# Supplementary material
Source: PubMed Central journal article supplement (PMC2783737)
Supplement: NIHMS112301-supplement-2.pdf [file NIHMS112301-supplement-2.pdf]

Please note, below are 11,369 shRNA sequences targeting human CD antigens. The entire library consisted of 22,000 shRNA sequences, which included additional mouse genes not used in this study.

```
>CD_NM_001766:590
CgCCtGcgagtctGGtatGATCCAGATCTCGTCCTTCGCCATTCAAGAGATGGCGAAGGACGAGATCTGGAGTTTTTGct
cgagctggcgaattcc
>CD_NM_001766:683
CgCCtGcgagtctGGtatGCCGGACACCGTCCGCTCTCTGATTCAAGAGATCAGAGAGCGGACGGTGTCCGATTTTTTGct
cgagctggcgaattcc
>CD_NM_001766:749
CgCCtGcgagtctGGtatGATGCAGCATATATTTTCGGGTTTTTCAAGAGAAAACCCGAAATATATGCTGCAGTTTTTGct
cgagctggcgaattcc
>CD_NM_001766:893
CgCCtGcgagtctGGtatGCTCCATGTAGCATTTCAAGGAATTCAAGAGATTCCTTGAAATGCTACATGGAATTTTTGct
cgagctggcgaattcc
>CD_NM_001766:1454
CgCCtGcgagtctGGtatGATGGGCTTTACCTCCCGGTTTTATTCAAGAGATAAACCGGGAGGTAAAGCCACTTTTTGct
cgagctggcgaattcc
>CD_NM_001766.2:1454
CgCCtGcgagtctGGtatGCGGGCTTTACCTCCCGGTTTAATTCAAGAGATTAAACCGGGAGGTAAAGCCACTTTTTGct
cgagctggcgaattcc
>CD_NM_001766.2:1172
CgCCtGcgagtctGGtatGCTGTCTCAGGATTCTACCCAAATTCAAGAGATTTGGGTAGAATCCTGAGACATTTTTTGct
cgagctggcgaattcc
>CD_NM_001766.2:590
CgCCtGcgagtctGGtatGCCAGATCTCGTCCTTCGCCAATTCAAGAGATTGGCGAAGGACGAGATCTGGATTTTTGct
cgagctggcgaattcc
>CD_NM_001766.2:1020
CgCCtGcgagtctGGtatGCACAGTGCAGTGGCTCCTTAATTTCAAGAGAATTAAGGAGCCACTGCACTGTTTTTTGct
cgagctggcgaattcc
>CD_NM_001766.2:738
CgCCtGcgagtctGGtatGATGGGAGACGCTGCAGCATATATTTCAAGAGATATATGCTGCAGCGTCTCCACTTTTTGct
cgagctggcgaattcc
>CD_NM_001766.2:1359
CgCCtGcgagtctGGtatGAGGCCAGGACATCGTCCTTACTTCAAGAGAGTAGAGGACGATGTCTTGCCCTTTTTGct
cgagctggcgaattcc
>CD_NM_001766.2:981
CgCCtGcgagtctGGtatGAGCCATTCAAGTGCTCAACCAGTTCAAGAGACTGGTTGAGCACTTGAATGGCCTTTTTGct
cgagctggcgaattcc
>CD_NM_001766.2:683
CgCCtGcgagtctGGtatGAGGACACCGTCCGCTCTCTGAATTCAAGAGATTCAGAGAGCGGACGGTGTCCGTTTTTGct
cgagctggcgaattcc
>CD_NM_001766.2:867
CgCCtGcgagtctGGtatGACCTGGGAACGCCCAAATAACTTCAAGAGAGTTATTTGAGGCGTTCCAGGGTTTTTGct
cgagctggcgaattcc
>CD_NM_001766.2:1056
CgCCtGcgagtctGGtatGCTTTGTCAGTGGCCTCCTTGAGTTCAAGAGACTCAAGGAGGCCACTGACAAATTTTTGct
cgagctggcgaattcc
>CD_NM_001766.2:1445
CgCCtGcgagtctGGtatGCCCTCATTGTGGGCTTTACCTCTTCAAGAGAGAGGTAAAGCCACAATGAGGATTTTTGct
cgagctggcgaattcc
>CD_NM_001766.2:879
CgCCtGcgagtctGGtatGATCAAATAACTTCTTCATGTATTCAAGAGATACATGGAAGAAGTTATTTGAGTTTTTGct
cgagctggcgaattcc
```

>CD\_NM\_001766.2:1421  
CgCCtGcgagtctGGtatGAAGTCCTGGCGTGCTTGTCTGTTTTCAAGAGAAACAGCAAGCACGCCAGGACTGTTTTTGct  
cgagctggcgaattcc

>CD\_NM\_001766.2:1146  
CgCCtGcgagtctGGtatGACCTGGCCGTCTGCTGCTGGTGTTC AAGAGACACCAGCAGCAGACGGCCAGGGTTTTTGct  
cgagctggcgaattcc

>CD\_NM\_001766.2:1077  
CgCCtGcgagtctGGtatGATCAGGGAAGTCGGA ACTGAAGTTCAAGAGACTTCAGTTC CGACTTCCCTGACTTTTTTGct  
cgagctggcgaattcc

>CD\_NM\_001766.2:1157  
CgCCtGcgagtctGGtatGCGCTGCTGGTGTGCCATGTCTCTTCAAGAGAGAGACATGGCACACCAGCAGCATTTTTTGct  
cgagctggcgaattcc

>CD\_NM\_001766.2:866  
CgCCtGcgagtctGGtatGCCCTGGGAACGCCTCAAATAATTCAAGAGATTATTTGAGGCGTTCCAGGGTTTTTGct  
cgagctggcgaattcc

>CD\_NM\_001766.2:1152  
CgCCtGcgagtctGGtatGACGTCTGCTGCTGGTGTGCCATTTCAAGAGAATGGCACACCAGCAGCAGACGGTTTTTGct  
cgagctggcgaattcc

>CD\_NM\_001766.2:1194  
CgCCtGcgagtctGGtatGACCTGTATGGGTGAAGTGGATGTTCAAGAGACATCCACTTCACCCATACAGGCTTTTTTGct  
cgagctggcgaattcc

>CD\_NM\_001766.2:742  
CgCCtGcgagtctGGtatGAAGACGCTGCAGCATATATTTCTTCAAGAGAGAAATATATGCTGCAGCGTCTTTTTTGct  
cgagctggcgaattcc

>CD\_NM\_001766.2:1273  
CgCCtGcgagtctGGtatGAAGACATGGTATCTCCGAGCAATTCAAGAGATTGCTCGGAGATAACCATGTCTTTTTTGct  
cgagctggcgaattcc

>CD\_NM\_001766.2:1067  
CgCCtGcgagtctGGtatGACCTCCTTGAGTCAGGGAAGTCTTCAAGAGAGACTTCCCTGACTCAAGGAGGCTTTTTTGct  
cgagctggcgaattcc

>CD\_NM\_001766.2:1434  
CgCCtGcgagtctGGtatGATTGCTGTTCTCCTCATTGTGTTCAAGAGACACAATGAGGAGGAACAGCAAGTTTTTGct  
cgagctggcgaattcc

>CD\_NM\_001766.2:656  
CgCCtGcgagtctGGtatGCGCAGACGCACAGCTGGAGCAATTCAAGAGATTGCTCCAGCTGTGCGTCTGCATTTTTTGct  
cgagctggcgaattcc

>CD\_NM\_001766.2:1159  
CgCCtGcgagtctGGtatGATGCTGGTGTGCCATGTCTCAGTTC AAGAGACTGAGACATGGCACACCAGCAGTTTTTGct  
cgagctggcgaattcc

>CD\_NM\_001766.2:1398  
CgCCtGcgagtctGGtatGATCCATGGGCTTGATTGCCTTGTTCAAGAGACAAGGCAATCAAGCCCATGGAGTTTTTGct  
cgagctggcgaattcc

>CD\_NM\_001766.2:1060  
CgCCtGcgagtctGGtatGATCAGTGGCCTCCTTGAGTCAGTTC AAGAGACTGACTCAAGGAGGCCACTGACTTTTTTGct  
cgagctggcgaattcc

>CD\_NM\_001766.2:1025  
CgCCtGcgagtctGGtatGCGCAGTGGCTCCTTAATGGCACTTCAAGAGAGTGCATTAAGGAGGCCACTGCATTTTTTGct  
cgagctggcgaattcc

>CD\_NM\_030893:302  
CgCCtGcgagtctGGtatGATGCTGGTCAATTTAGCTTGATTCAAGAGATCAAGCTGAAATTGACCAGCAGTTTTTGct  
cgagctggcgaattcc

>CD\_NM\_030893:458  
CgCCtGcgagtctGGtatGCCCGGGCC CAGAACATCTGTAATTCAAGAGATTACAGATGTTCTGGGCCCGGATTTTTTGct  
cgagctggcgaattcc

>CD\_NM\_030893:481

CgCtGcgagtctGGtatGATGCTCAATCGCTACCTAGATATTCAAGAGATATCTAGGTAGCGATTGAGCACTTTTTGct  
cgagctggcgaattcc  
>CD\_NM\_030893:489  
CgCtGcgagtctGGtatGCCGCTACCTAGATATTAAGGAATTCAGAGATTCCTTAATATCTAGGTAGCGATTTTTTGct  
cgagctggcgaattcc  
>CD\_NM\_030893:571  
CgCtGcgagtctGGtatGAGGGAGTCAGAACTGAAACGGATTCAAGAGATCCGTTTCAGTTCTGACTCCCCTTTTTGct  
cgagctggcgaattcc  
>CD\_NM\_030893:848  
CgCtGcgagtctGGtatGAGGGCCATGATCTAATCATCCATTCAAGAGATGGATGATTAGATCATGGCCCCTTTTGct  
cgagctggcgaattcc  
>CD\_NM\_030893:181  
CgCtGcgagtctGGtatGCTGGGCACCATCCGCTTCTGATTCAAGAGATCAGAAAGCGGATGGTGCCCAATTTTTGct  
cgagctggcgaattcc  
>CD\_NM\_030893.1:291  
CgCtGcgagtctGGtatGATGCAAGCTTCTGCTGGTCAATTTCAAGAGAATTGACCAGCAGAAGCTTGCACTTTTGct  
cgagctggcgaattcc  
>CD\_NM\_030893.1:247  
CgCtGcgagtctGGtatGCACAGTCACTGTTCCAGTTATATTCAAGAGATATAACTGGAACAGTACTGTATTTTTGct  
cgagctggcgaattcc  
>CD\_NM\_030893.1:683  
CgCtGcgagtctGGtatGACCCGTGTGGGTGATGTGGATGTTCAAGAGACATCCACATCACCCACACGGGCTTTTTGct  
cgagctggcgaattcc  
>CD\_NM\_030893.1:661  
CgCtGcgagtctGGtatGCTGTCTCAGGATTCTACCCAAATTCAGAGATTTGGGTAGAATCCTGAGACATTTTTGct  
cgagctggcgaattcc  
>CD\_NM\_030893.1:181  
CgCtGcgagtctGGtatGCGGGCACCATCCGCTTCTGAATTCAGAGATTCAGAAAGCGGATGGTGCCATTTTTGct  
cgagctggcgaattcc  
>CD\_NM\_030893.1:914  
CgCtGcgagtctGGtatGAATAGTTACCTGGTCATATTGTTCAAGAGACAATATGACCAGGGTAACTATCTTTTTGct  
cgagctggcgaattcc  
>CD\_NM\_030893.1:407  
CgCtGcgagtctGGtatGCTTCTGAGTTTCCAAGGAATTTTCAAGAGAAATTCCTTGAAACTCAGGAAATTTTTGct  
cgagctggcgaattcc  
>CD\_NM\_030893.1:531  
CgCtGcgagtctGGtatGAACACCTGCCCTCGATTTCTAGTTCAAGAGACTAGAAATCGAGGGCAGGTGTGTTTTGct  
cgagctggcgaattcc  
>CD\_NM\_030893.1:881  
CgCtGcgagtctGGtatGCTCCATCTTCTCATCCTGATCTTCAAGAGAGATCAGGATGAGAAAGATGGAATTTTTGct  
cgagctggcgaattcc  
>CD\_NM\_030893.1:848  
CgCtGcgagtctGGtatGAGGCCATGATCTAATCATCCATTTCAGAGAAATGGATGATTAGATCATGGCCCCTTTTGct  
cgagctggcgaattcc  
>CD\_NM\_030893.1:305  
CgCtGcgagtctGGtatGCGGTCAATTCAGCTTGAATACTTCAAGAGAGTATTCAAGCTGAAATTGACCATTTTTGct  
cgagctggcgaattcc  
>CD\_NM\_030893.1:887  
CgCtGcgagtctGGtatGATTTCTCATCCTGATCTGTTTGTTCAGAGACAAACAGATCAGGATGAGAAAGTTTTGct  
cgagctggcgaattcc  
>CD\_NM\_030893.1:401  
CgCtGcgagtctGGtatGATCAGATTTCTGAGTTTCCAATTCAGAGATTTGAAACTCAGGAAATCTGACTTTTTGct  
cgagctggcgaattcc  
>CD\_NM\_030893.1:303

CgCtGcgagtctGGtatGACTGGTCAATTCAGCTTGAATTTCAAGAGAATTCAGCTGAAATTGACCAGCTTTTTGct  
cgagctggcgaattcc  
>CD\_NM\_030893.1:339  
CgCtGcgagtctGGtatGAAGATATTAGCTGGCTGTAGAATTCAGAGATTCACAGCCAGCTAATATCTGTTTTGct  
cgagctggcgaattcc  
>CD\_NM\_030893.1:900  
CgCtGcgagtctGGtatGCTCTGTTGACTGTGATAGTTATTCAAGAGATAACTATCACAGTCAAACAGATTTTTGct  
cgagctggcgaattcc  
>CD\_NM\_030893.1:646  
CgCtGcgagtctGGtatGCGCAGCTTGTGTGCCATGTCTCTTCAAGAGAGAGACATGGCACACAAGCTGCATTTTTGct  
cgagctggcgaattcc  
>CD\_NM\_030893.1:88  
CgCtGcgagtctGGtatGCCAAACTTCTCCTTTGCCAATTCAGAGATTGGCAAAGGAGGAAGTTGGATTTTTGct  
cgagctggcgaattcc  
>CD\_NM\_030893.1:937  
CgCtGcgagtctGGtatGCTGTAGTTGACTCACGGTTAAATTCAGAGATTTAACCGTGAGTCAACTACAATTTTTGct  
cgagctggcgaattcc  
>CD\_NM\_030893.1:245  
CgCtGcgagtctGGtatGATTACAGTCACTGTTCCAGTTATTCAAGAGATAACTGGAACAGTGACTGTAAGTTTTGct  
cgagctggcgaattcc  
>CD\_NM\_030893.1:117  
CgCtGcgagtctGGtatGCGGGCACACAGTGAGGGCTCAGTTCAAGAGACTGAGCCCTCACTGTGTGCCATTTTTGct  
cgagctggcgaattcc  
>CD\_NM\_030893.1:121  
CgCtGcgagtctGGtatGAACACAGTGAGGGCTCAGGATGTTCAAGAGACATCCTGAGCCCTCACTGTGTTTTTGct  
cgagctggcgaattcc  
>CD\_NM\_030893.1:889  
CgCtGcgagtctGGtatGCTCTCATCTGATCTGTTTACTTCAAGAGAGTCAAACAGATCAGGATGAGAATTTTTGct  
cgagctggcgaattcc  
>CD\_NM\_030893.1:578  
CgCtGcgagtctGGtatGCGAACTGAAACGGAAAGTGAAGTTCAAGAGACTTCACTTTCCGTTTCACTTTTTGct  
cgagctggcgaattcc  
>CD\_NM\_030893.1:648  
CgCtGcgagtctGGtatGAAGCTTGTGTGCCATGTCTCAGTTCAAGAGACTGAGACATGGCACACAAGCTTTTTGct  
cgagctggcgaattcc  
>CD\_NM\_030893.1:154  
CgCtGcgagtctGGtatGCGCAGACTCATGGCTGGGACACTTCAAGAGAGTGTCCAGCCATGAGTCTGCATTTTTGct  
cgagctggcgaattcc  
>CD\_M28825:803  
CgCtGcgagtctGGtatGAACCATTGGTCAATTTGAGGGATTCAAGAGATCCCTCAAATGACCGAATGGTGTTTTTGct  
cgagctggcgaattcc  
>CD\_M28825:835  
CgCtGcgagtctGGtatGCCGCCATGAATTGCAGTTTGATTCAAGAGATCAAACGCAATTCATGGGCGTTTTGct  
cgagctggcgaattcc  
>CD\_M28825:836  
CgCtGcgagtctGGtatGAGCCCATGAATTGCAGTTTGATTCAAGAGATCAAACGCAATTCATGGGCGTTTTGct  
cgagctggcgaattcc  
>CD\_M28825:884  
CgCtGcgagtctGGtatGCGGCTGTGAGCTGCACTCTGATTCAAGAGATCCAGAGTGCAGCTCACAGCTTTTTGct  
cgagctggcgaattcc  
>CD\_M28825:979  
CgCtGcgagtctGGtatGCGCCATATCCAGTGGCTGGGAATTCAGAGATCCAGCCACTGGATATGGCATTTTTGct  
cgagctggcgaattcc  
>CD\_NM\_001763.1:1054

CgCtGcgagtctGGtatGCACACACAATCTTCTCAGTGACTTCAAGAGAGTCACTGAGAAGATTGTGTGTTTTTTGct  
cgagctggcgaattcc  
>CD\_NM\_001763.1:1457  
CgCtGcgagtctGGtatGATGCCTTTACTTCTTCTGATAGTTCAAGAGACTATCAGAAGAAGTAAAGGCACTTTTTGct  
cgagctggcgaattcc  
>CD\_NM\_001763.1:835  
CgCtGcgagtctGGtatGAGCCCATGAATTGCAGTTTGAATTCAAGAGATTCAAACCTGCAATTCATGGGCGTTTTTGct  
cgagctggcgaattcc  
>CD\_NM\_001763.1:945  
CgCtGcgagtctGGtatGAAGACTTTGTGAGCTTCCAGAATTCAAGAGATTCTGGAAGCTCACAAAGTCTGTTTTTGct  
cgagctggcgaattcc  
>CD\_NM\_001763.1:1225  
CgCtGcgagtctGGtatGACCCGTGTGGGTGATGTGGATGTTCAAGAGACATCCACATCACCCACACGGGCTTTTTGct  
cgagctggcgaattcc  
>CD\_NM\_001763.1:1203  
CgCtGcgagtctGGtatGCTGTCTCAGGATTCTACCCAAATTCAAGAGATTGGGTAGAATCCTGAGACATTTTTTGct  
cgagctggcgaattcc  
>CD\_NM\_001763.1:1462  
CgCtGcgagtctGGtatGCTTACTTCTTCTGATAGGTCTTTTCAAGAGAAAGACCTATCAGAAGAAGTAAATTTTTGct  
cgagctggcgaattcc  
>CD\_NM\_001763.1:607  
CgCtGcgagtctGGtatGATCCTTCCATGTCATCTGGATCTTCAAGAGAGATCCAGATGACATGGAAGGAGTTTTTGct  
cgagctggcgaattcc  
>CD\_NM\_001763.1:943  
CgCtGcgagtctGGtatGCTCAGACTTTGTGAGCTTCCAGTTCAAGAGACTGGAAGCTCACAAAGTCTGATTTTTTGct  
cgagctggcgaattcc  
>CD\_NM\_001763.1:1390  
CgCtGcgagtctGGtatGAGGCCAGGACATCGTCCTTACTTCAAGAGAGTAGAGGACGATGTCTTGCCCTTTTTGct  
cgagctggcgaattcc  
>CD\_NM\_001763.1:568  
CgCtGcgagtctGGtatGACCAGGTGATGGCAATGCAGACTTCAAGAGAGTCTGCATTGCCATCACCTGGGTTTTTGct  
cgagctggcgaattcc  
>CD\_NM\_001763.1:667  
CgCtGcgagtctGGtatGATCAGGTTGGCTGAGTGATTTGTTCAAGAGACAAATCACTCAGCCAACCTGAGTTTTTGct  
cgagctggcgaattcc  
>CD\_NM\_001763.1:949  
CgCtGcgagtctGGtatGATTTGTGAGCTTCCAGAACAATTTCAAGAGAATTGTTCTGGAAGCTCACAAAGTTTTTGct  
cgagctggcgaattcc  
>CD\_NM\_001763.1:1188  
CgCtGcgagtctGGtatGCGCAGCTTGTGTGCCATGTCTTCAAGAGAGAGACATGGCACACAAGCTGCATTTTTTGct  
cgagctggcgaattcc  
>CD\_NM\_001763.1:1177  
CgCtGcgagtctGGtatGACCTGGCCATCTGCAGCTTGTGTTCAAGAGACACAAGCTGCAGATGGCCAGGGTTTTTGct  
cgagctggcgaattcc  
>CD\_NM\_001763.1:1496  
CgCtGcgagtctGGtatGCGGAAACGCTGTTTCTGTTAAGTTCAAGAGACTTAACAGAAACAGCGTTTCCTTTTTTGct  
cgagctggcgaattcc  
>CD\_NM\_001763.1:1294  
CgCtGcgagtctGGtatGAAGTGCTGATGGGACATGGTATTTCAAGAGAATACCATGTCCATCAGCACTGTTTTTGct  
cgagctggcgaattcc  
>CD\_NM\_001763.1:1025  
CgCtGcgagtctGGtatGATCAATCAGAAATCAGCATGAAATTCAAGAGATTTTCATGCTGATTCTGATTGAGTTTTTGct  
cgagctggcgaattcc  
>CD\_NM\_001763.1:1012

CgCctGcgagtctGGtatGCTTCTGCAAAGTGCTCAATCAGTTCAAGAGACTGATTGAGCACTTTGCAGAAATTTTTGct  
cgagctggcgaattcc  
>CD\_NM\_001763.1:601  
CgCctGcgagtctGGtatGACCTCTCTCCTCCATGTCATCTTCAAGAGAGATGACATGGAAGGAGAGAGGCTTTTTGct  
cgagctggcgaattcc  
>CD\_NM\_001763.1:769  
CgCctGcgagtctGGtatGATGGAAGGAACCTGAAACATTATTCAAGAGATAATGTTTCCAGTTCCCTCCACTTTTTGct  
cgagctggcgaattcc  
>CD\_NM\_001763.1:702  
CgCctGcgagtctGGtatGAGGACAGCAATTCAGCACCATTTCAAGAGAATGGTGCTGGAATTGCTGTCCCTTTTTGct  
cgagctggcgaattcc  
>CD\_NM\_001763.1:926  
CgCctGcgagtctGGtatGAAGTTAGCTTATCAAGGATCAGTTCAAGAGACTGATCCTTGATAAGCTAACTGTTTTGct  
cgagctggcgaattcc  
>CD\_NM\_001763.1:836  
CgCctGcgagtctGGtatGACCCATGAATTGCAGTTTGAATTTCAAGAGAATTCAAACCTGCAATTCATGGGCTTTTTGct  
cgagctggcgaattcc  
>CD\_NM\_001763.1:777  
CgCctGcgagtctGGtatGCACTGGAAACATTATTCCGTATTTCAAGAGAATACGGAATAATGTTTCCAGTTTTTTGct  
cgagctggcgaattcc  
>CD\_NM\_001763.1:979  
CgCctGcgagtctGGtatGACCATATCCAGTGGCTGGGAATTTCAAGAGAATTCAGCCACTGGATATGGCTTTTTGct  
cgagctggcgaattcc  
>CD\_NM\_001763.1:1190  
CgCctGcgagtctGGtatGAAGCTTGTGTGCCATGTCTCAGTTCAAGAGACTGAGACATGGCACACAAGCTGTTTTGct  
cgagctggcgaattcc  
>CD\_NM\_001763.1:612  
CgCctGcgagtctGGtatGCCCATGTTCATCTGGATCGCATCTTCAAGAGAGATGCGATCCAGATGACATGGATTTTTGct  
cgagctggcgaattcc  
>CD\_NM\_001765:223  
CgCctGcgagtctGGtatGCGGGACAGTGAATCAGGCACAATTCAGAGATTGTGCCTGATTCCTGTCCTTTTTGct  
cgagctggcgaattcc  
>CD\_NM\_001765:225  
CgCctGcgagtctGGtatGAGACAGTGAATCAGGCACAATTCAGAGATATTGTGCCTGATTCCTGTCCTTTTTGct  
cgagctggcgaattcc  
>CD\_NM\_001765:314  
CgCctGcgagtctGGtatGCTCGTTTCTACCTCTTTGGATTTTTCAAGAGAAATCCAAAGAGGTAGAAACGAATTTTTGct  
cgagctggcgaattcc  
>CD\_NM\_001765:565  
CgCctGcgagtctGGtatGAGCGTCACAGAAACAGTGTATATTCAAGAGATATACTGTTTCTGTGACGCCTTTTTGct  
cgagctggcgaattcc  
>CD\_NM\_001765:973  
CgCctGcgagtctGGtatGATAGTGATAGTGCCCTTGGTGATTCAAGAGATCACCAAGGGCACTATCACTACTTTTTGct  
cgagctggcgaattcc  
>CD\_NM\_001765.1:142  
CgCctGcgagtctGGtatGCCAGATCTTCTCATTTGTCAATTCAGAGATTGACAAATGAGAAGATCTGGATTTTTGct  
cgagctggcgaattcc  
>CD\_NM\_001765.1:1000  
CgCctGcgagtctGGtatGCAGTCCTTGTGTTATGGTTTAAATTCAGAGATTAAACCATAACACAAGGACTATTTTTGct  
cgagctggcgaattcc  
>CD\_NM\_001765.1:973  
CgCctGcgagtctGGtatGCAGTGATAGTGCCCTTGGTGATTTCAAGAGAATCACCAAGGGCACTATCACTATTTTTGct  
cgagctggcgaattcc  
>CD\_NM\_001765.1:914

CgCtGcgagtctGGtatGCGGCCAGGACATCATCCTCTACTTCAAGAGAGTAGAGGATGATGTCTTGGCCTTTTTTgct  
cgagctggcgaattcc  
>CD\_NM\_001765.1:225  
CgCtGcgagtctGGtatGAACAGTGAATCAGGCACAATAATTCAGAGATTATTGTGCCTGATTCACTGTCTTTTTGct  
cgagctggcgaattcc  
>CD\_NM\_001765.1:536  
CgCtGcgagtctGGtatGATGTCATCTACTCAATCATCAGTTCAAGAGACTGATGATTGAGTAGATGACAGTTTTTgct  
cgagctggcgaattcc  
>CD\_NM\_001765.1:632  
CgCtGcgagtctGGtatGCGCAGGGAAGATGTATGTACACTTCAAGAGAGTGTACATACATCTTCCCTGCATTTTTGct  
cgagctggcgaattcc  
>CD\_NM\_001765.1:314  
CgCtGcgagtctGGtatGCCGTTTCTACCTCTTTGGATTATTCAAGAGATAATCCAAAGAGGTAGAAACGATTTTTGct  
cgagctggcgaattcc  
>CD\_NM\_001765.1:128  
CgCtGcgagtctGGtatGATCCTTCCATGTCATCCAGATCTTCAAGAGAGATCTGGATGACATGGAAGGAGTTTTTgct  
cgagctggcgaattcc  
>CD\_NM\_001765.1:530  
CgCtGcgagtctGGtatGCAGTGTCTGTCATCTACTCAATTTCAAGAGAATTGAGTAGATGACAGACACTTTTTTgct  
cgagctggcgaattcc  
>CD\_NM\_001765.1:727  
CgCtGcgagtctGGtatGCTGCCTCCGGCTTCTACCCAAATTCAGAGATTTGGGTAGAAGCCGGAGGCATTTTTTgct  
cgagctggcgaattcc  
>CD\_NM\_001765.1:749  
CgCtGcgagtctGGtatGACCTGTTTGGGTGACATGGATGTTCAAGAGACATCCATGTCACCCAAACAGGCTTTTTTgct  
cgagctggcgaattcc  
>CD\_NM\_001765.1:223  
CgCtGcgagtctGGtatGAGGACAGTGAATCAGGCACAATTTCAAGAGAATTGTGCCTGATTCACTGTCCCTTTTTGct  
cgagctggcgaattcc  
>CD\_NM\_001765.1:792  
CgCtGcgagtctGGtatGAGCACTAAACATGGTGATATTCTTCAAGAGAGAATATCACCATGTTTAGTGCCTTTTTGct  
cgagctggcgaattcc  
>CD\_NM\_001765.1:998  
CgCtGcgagtctGGtatGCATAGTCCTTGTGTTATGGTTTTTCAAGAGAAAACCATAACACAAGGACTATTTTTTgct  
cgagctggcgaattcc  
>CD\_NM\_001765.1:369  
CgCtGcgagtctGGtatGCACTCGAAATATCCCTTTGAAGTTCAAGAGACTTCAAAGGGATATTTGAGTATTTTTGct  
cgagctggcgaattcc  
>CD\_NM\_001765.1:147  
CgCtGcgagtctGGtatGCTCTTCTCATTTGTCAACCAATTTCAAGAGAATTGGTTGACAAATGAGAAGATTTTTTgct  
cgagctggcgaattcc  
>CD\_NM\_001765.1:466  
CgCtGcgagtctGGtatGCAGATTTACTGAGTTTCCAGAATTCAAGAGATTCTGGAAACTCAGTAAATCTATTTTTGct  
cgagctggcgaattcc  
>CD\_NM\_001765.1:795  
CgCtGcgagtctGGtatGCCTAAACATGGTGATATTCTTCTTCAAGAGAGAAGAATATCACCATGTTTAGTTTTTgct  
cgagctggcgaattcc  
>CD\_NM\_001765.1:567  
CgCtGcgagtctGGtatGATCACAGAAACAGTGTATAATCTTCAAGAGAGATTATACACTGTTTCTGTGACTTTTTGct  
cgagctggcgaattcc  
>CD\_NM\_001765.1:345  
CgCtGcgagtctGGtatGCTTCAAGACCATGCAAGTCAAGTTCAAGAGACTTGACTTGCATGGTCTTGAATTTTTTgct  
cgagctggcgaattcc  
>CD\_NM\_001765.1:87

CgCctGcgagtctGGtatGATCCCAGGTGGTGACAATGCAGTTCAAGAGACTGCATTGTCACCACCTGGGAGTTTTTGct  
cgagctggcgaattcc  
>CD\_NM\_001765.1:1003  
CgCctGcgagtctGGtatGCCCTTGTGTTATGGTTTAAGAATTCAAGAGATTCTTAAACCATAACACAAGGATTTTTTGct  
cgagctggcgaattcc  
>CD\_NM\_001765.1:451  
CgCctGcgagtctGGtatGCAGCTTTC AACCGATTAGATTTTTTCAAGAGAAAATCTAATCCGTTGAAAGCTATTTTTTGct  
cgagctggcgaattcc  
>CD\_NM\_001765.1:980  
CgCctGcgagtctGGtatGCGTGCCCTTGGTGATTCTAATATTCAAGAGATATTAGAATCACCAAGGGCACTTTTTTGct  
cgagctggcgaattcc  
>CD\_NM\_001765.1:464  
CgCctGcgagtctGGtatGCTTAGATTTACTGAGTTTCCAGTTCAAGAGACTGGAACTCAGTAAATCTAATTTTTTGct  
cgagctggcgaattcc  
>CD\_NM\_001765.1:800  
CgCctGcgagtctGGtatGCCATGGTGATATTCTTCCTAATTTCAAGAGAATTAGGAAGAATATCACCATGTTTTTGct  
cgagctggcgaattcc  
>CD\_NM\_001765.1:208  
CgCctGcgagtctGGtatGCGCAGACTCATGGCTGGGACAGTTCAAGAGACTGTCCCAGCCATGAGTCTGCATTTTTTGct  
cgagctggcgaattcc  
>CD\_NM\_001764:114  
CgCctGcgagtctGGtatGAGGGCCGACCTCCTTTCATGTTTTTCAAGAGAAACATGAAAGGAGGTCGGCCCTTTTTTGct  
cgagctggcgaattcc  
>CD\_NM\_001764:222  
CgCctGcgagtctGGtatGCAGCGACTCAGGCCTGCCATATTCAAGAGATATGGCAGTGCCTGAGTCGCTATTTTTTGct  
cgagctggcgaattcc  
>CD\_NM\_001764:350  
CgCctGcgagtctGGtatGCTGCCGGTGATTTCCAGATGAATTCAAGAGATTCATCTGGAAATCACCGCAATTTTTTGct  
cgagctggcgaattcc  
>CD\_NM\_001764:506  
CgCctGcgagtctGGtatGCAGGTGGCAGCAGGGCACAGAATTCAAGAGATTCCTGTGCCCTGCTGCCACCTTTTTTGct  
cgagctggcgaattcc  
>CD\_NM\_001764:881  
CgCctGcgagtctGGtatGATCGGGTGAAGCACAGCAGTTTTTCAAGAGAAAACCTGCTGTGCTTCACCCGACTTTTTTGct  
cgagctggcgaattcc  
>CD\_NM\_001764:1017  
CgCctGcgagtctGGtatGAAGGCGCCGGTCATATCAGAATTTCAAGAGAATTCTGATATGACCGGCGCCTTTTTTGct  
cgagctggcgaattcc  
>CD\_NM\_001764.1:165  
CgCctGcgagtctGGtatGCGGGCACAAACTCAAGGCTCAGTTCAAGAGACTGAGCCTTGAGTTTGTGCCATTTTTTGct  
cgagctggcgaattcc  
>CD\_NM\_001764.1:350  
CgCctGcgagtctGGtatGCGCCGGTGATTTCCAGATGAATTCAAGAGATTCATCTGGAAATCACCGCAATTTTTTGct  
cgagctggcgaattcc  
>CD\_NM\_001764.1:308  
CgCctGcgagtctGGtatGACGAGTCTACATCTTTGGATTCTTCAAGAGAGAATCCAAAGATGTAGACTCGGTTTTTGct  
cgagctggcgaattcc  
>CD\_NM\_001764.1:905  
CgCctGcgagtctGGtatGAGGCCAGGACATCATCCTCTACTTCAAGAGAGTAGAGGATGATGTCTTGCCCTTTTTTGct  
cgagctggcgaattcc  
>CD\_NM\_001764.1:353  
CgCctGcgagtctGGtatGAGGTGATTTCCAGATGAATACTTCAAGAGAGTATTTTCATCTGGAAATCACCGTTTTTGct  
cgagctggcgaattcc  
>CD\_NM\_001764.1:740



CgCctGcgagtctGGtatGACCCGTGTGGGTGATGTGGATGTTCAAGAGACATCCACATCACCCACACGGGCTTTTTTGct  
cgagctggcgaattcc  
>CD\_NM\_001764.1:202  
CgCctGcgagtctGGtatGCGCAGATTCATGGCTGGGATAGTTCAAGAGACTATCCCAGCCATGAATCTGCATTTTTTGct  
cgagctggcgaattcc  
>CD\_NM\_001764.1:520  
CgCctGcgagtctGGtatGAACAGAAATTCGTGCTACTAATTTCAAGAGAATTAGTGCACAGAATTTCTGTGTTTTTGct  
cgagctggcgaattcc  
>CD\_NM\_001764.1:718  
CgCctGcgagtctGGtatGCTGTCTCAGGATTCTACCCAAATTTCAAGAGATTTGGGTAGAATCCTGAGACATTTTTTGct  
cgagctggcgaattcc  
>CD\_NM\_001764.1:796  
CgCctGcgagtctGGtatGAGGACATCCTGCCCAATGCTAATTTCAAGAGATTAGCATTGGGCAGGATGTCCCTTTTTTGct  
cgagctggcgaattcc  
>CD\_NM\_001764.1:191  
CgCctGcgagtctGGtatGATTGGATGATTTGCAGATTCATTTCAAGAGAATGAATCTGCAAATCATCCAACTTTTTGct  
cgagctggcgaattcc  
>CD\_NM\_001764.1:272  
CgCctGcgagtctGGtatGCAGTGATAAGGAGGTTGCTGAGTTCAAGAGACTCAGCAACCTCCTTATCACTATTTTTTGct  
cgagctggcgaattcc  
>CD\_NM\_001764.1:136  
CgCctGcgagtctGGtatGCCAGACCTCGTCCTTTACCAATTTCAAGAGATTGGTAAAGGACGAGGTCTGGATTTTTTGct  
cgagctggcgaattcc  
>CD\_NM\_001764.1:421  
CgCctGcgagtctGGtatGATGCCATAGTAAGCTTCTGAGTTCAAGAGACTCAGGAAGCTTACTATGGCACTTTTTGct  
cgagctggcgaattcc  
>CD\_NM\_001764.1:910  
CgCctGcgagtctGGtatGCGGACATCATCCTCTACTGGAGTTCAAGAGACTCCAGTAGAGGATGATGTCCTTTTTTGct  
cgagctggcgaattcc  
>CD\_NM\_001764.1:997  
CgCctGcgagtctGGtatGACCTTGCATTATGGTATATGAGTTCAAGAGACTCATATACCATAATGCAAGGCTTTTTTGct  
cgagctggcgaattcc  
>CD\_NM\_001764.1:56  
CgCctGcgagtctGGtatGACCATTTCAACTGTTAGCTGTTTTCAAGAGAAACAGCTAACAGTTGAAATGGCTTTTTTGct  
cgagctggcgaattcc  
>CD\_NM\_001764.1:411  
CgCctGcgagtctGGtatGAATTCTGGAGGTGCCATAGTAATTTCAAGAGATTACTATGGCACCTCCAGAATGTTTTTGct  
cgagctggcgaattcc  
>CD\_NM\_001764.1:51  
CgCctGcgagtctGGtatGATGCTGCCATTTCAACTGTTAGTTCAAGAGACTAACAGTTGAAATGGCAGCAGTTTTTGct  
cgagctggcgaattcc  
>CD\_NM\_001764.1:298  
CgCctGcgagtctGGtatGCGGAGATATCCGAGTCTACATTTCAAGAGAATGTAGACTCGGAATATCTCCTTTTTTGct  
cgagctggcgaattcc  
>CD\_NM\_001764.1:703  
CgCctGcgagtctGGtatGCGCAGCTTGTGTGCCATGTCTCTTCAAGAGAGAGACATGGCACACAAGCTGCATTTTTTGct  
cgagctggcgaattcc  
>CD\_NM\_001764.1:458  
CgCctGcgagtctGGtatGCTTGGATTTCTGAGTGTCAAGTTCAAGAGACTTGACACTCAGGAAATCCAATTTTTTGct  
cgagctggcgaattcc  
>CD\_NM\_001764.1:455  
CgCctGcgagtctGGtatGCGGATTGGATTTCTGAGTGTCTTCAAGAGAGACACTCAGGAAATCCAATCCTTTTTTGct  
cgagctggcgaattcc  
>CD\_NM\_001764.1:276

CgCctGcgagtctGGtatGAATAAGGAGGTTGCTGAGTTAGTTCAAGAGACTAACTCAGCAACCTCCTTATCTTTTTTGct  
cgagctggcgaattcc  
>CD\_NM\_001764.1:530  
CgCctGcgagtctGGtatGATGTGCACTAATCATAACAATATTTCAAGAGAATATTGTATGATTAGTGCACAGTTTTTGct  
cgagctggcgaattcc  
>CD\_NM\_001764.1:351  
CgCctGcgagtctGGtatGACCGGTGATTTCCAGATGAAATTTCAAGAGAATTTTCATCTGGAAATCACCGGCTTTTTTGct  
cgagctggcgaattcc  
>CD\_NM\_001764.1:994  
CgCctGcgagtctGGtatGCATGCCTTGCATTATGGTATATTTCAAGAGAATATACCATAATGCAAGGCATATTTTTTGct  
cgagctggcgaattcc  
>CD\_NM\_001767:418  
CgCctGcgagtctGGtatGATCCTGGACTTGTATCAACACATTCAAGAGATGTGTTGATACAAGTCCAGGAGTTTTTGct  
cgagctggcgaattcc  
>CD\_NM\_001767:576  
CgCctGcgagtctGGtatGAAGGGAACAAAGTCAGCAAGGATTCAAGAGATCCTTGCTGACTTTGTTCCTGTTTTTGct  
cgagctggcgaattcc  
>CD\_NM\_001767:608  
CgCctGcgagtctGGtatGAAGCCTGTCAGCTGTCCAGAGATTCAAGAGATCTCTGGACAGCTGACAGGCTTTTTTGct  
cgagctggcgaattcc  
>CD\_NM\_001767:768  
CgCctGcgagtctGGtatGAAGCCCACAGAGTAGCTACTGATTCAAGAGATCAGTAGCTACTCTGTGGGCTTTTTTGct  
cgagctggcgaattcc  
>CD\_NM\_001767.2:513  
CgCctGcgagtctGGtatGCTCTCAGAGGGTCATCACACTTCAAGAGAGTGTGTGATGACCCTCTGAGAATTTTTTGct  
cgagctggcgaattcc  
>CD\_NM\_001767.2:772  
CgCctGcgagtctGGtatGAACAGAGTAGCTACTGAAGAAATTTCAAGAGATTTCTTCAGTAGCTACTCTGTGTTTTTGct  
cgagctggcgaattcc  
>CD\_NM\_001767.2:306  
CgCctGcgagtctGGtatGAACCGATGATCAGGATATCTACTTCAAGAGAGTAGATATCCTGATCATCGGTCTTTTTTGct  
cgagctggcgaattcc  
>CD\_NM\_001767.2:71  
CgCctGcgagtctGGtatGCAGGTGCAGTCTCAAAGAGATTTCAAGAGAATCTCTTTGGAGACTGCACCTTTTTTTTGct  
cgagctggcgaattcc  
>CD\_NM\_001767.2:162  
CgCctGcgagtctGGtatGAAGTGATGATATTGACGATATATTTCAAGAGATATATCGTCAATATCATCACTCTTTTTTGct  
cgagctggcgaattcc  
>CD\_NM\_001767.2:16  
CgCctGcgagtctGGtatGCGCTTTCCATGTAAATTTGTAGTTCAAGAGACTACAAATTTACATGGAAAGCTTTTTTTTGct  
cgagctggcgaattcc  
>CD\_NM\_001767.2:291  
CgCctGcgagtctGGtatGCATTAAGCATCTGAAGACCGATTTCAAGAGAATCGGTCTTCAGATGCTTAATTTTTTTTGct  
cgagctggcgaattcc  
>CD\_NM\_001767.2:123  
CgCctGcgagtctGGtatGAGGTCAGGACATCAACTTGGACTTCAAGAGAGTCCAAGTTGATGTCTTGACCCTTTTTTGct  
cgagctggcgaattcc  
>CD\_NM\_001767.2:232  
CgCctGcgagtctGGtatGAAGAAAGAGACTTTCAAGGAAATTTCAAGAGATTTCTTGAAGTCTCTTTCTTTTTTGct  
cgagctggcgaattcc  
>CD\_NM\_001767.2:912  
CgCctGcgagtctGGtatGCGGACACCGTGTTCAGCACAGTTCAAGAGACTGGTGCTGAACACGGTGTCCATTTTTTGct  
cgagctggcgaattcc  
>CD\_NM\_001767.2:621

CgCctGcgagtctGGtatGCCAGAGAAAGGCTGGACATCTTCAAGAGAGATGTCCAGACCTTTCTCTGGATTTTTGct  
cgagctggcgaattcc  
>CD\_NM\_001767.2:630  
CgCctGcgagtctGGtatGCGGTCTGGACATCTATCTCATCTTCAAGAGAGATGAGATAGATGTCCAGACCTTTTTTgct  
cgagctggcgaattcc  
>CD\_NM\_001767.2:407  
CgCctGcgagtctGGtatGCACCAAAGATCTCCTGGACTTGTTC AAGAGACAAGTCCAGGAGATCTTTGGTTTTTTTTGct  
cgagctggcgaattcc  
>CD\_NM\_001767.2:847  
CgCctGcgagtctGGtatGCCCCAACATCCTCCTCCACCCTTCAAGAGAGTGGTGGAGGAGGATGTTGGGATTTTTGct  
cgagctggcgaattcc  
>CD\_NM\_001767.2:576  
CgCctGcgagtctGGtatGCGGGAACAAAGTCAGCAAGGAATTCAAGAGATTCCTTGCTGACTTTGTTCCCTTTTTTgct  
cgagctggcgaattcc  
>CD\_NM\_001767.2:416  
CgCctGcgagtctGGtatGCCTCCTGGACTTGTATCAACACTTCAAGAGAGTGTGATACAAGTCCAGGAGATTTTTGct  
cgagctggcgaattcc  
>CD\_NM\_001767.2:844  
CgCctGcgagtctGGtatGCCTTCCCAACATCCTCCTCCACTTCAAGAGAGTGGAGGAGGATGTTGGGAAGTTTTTgct  
cgagctggcgaattcc  
>CD\_NM\_001767.2:314  
CgCctGcgagtctGGtatGCTCAGGATATCTACAAGGTATCTTCAAGAGAGATACCTTGTAGATATCCTGATTTTTTgct  
cgagctggcgaattcc  
>CD\_NM\_001767.2:33  
CgCctGcgagtctGGtatGCGTAGCCAGCTTCCTTCTGATTTTTCAAGAGAAATCAGAAGGAAGCTGGCTACATTTTTTgct  
cgagctggcgaattcc  
>CD\_NM\_001767.2:666  
CgCctGcgagtctGGtatGCGGAGGCAGCCTCTTGATGGTCTTCAAGAGAGACCATCAAGAGGCTGCCTCCTTTTTTgct  
cgagctggcgaattcc  
>CD\_NM\_001767.2:78  
CgCctGcgagtctGGtatGCGTCTCCAAAGAGATTACGAATTTCAAGAGAATTCGTAATCTCTTTGGAGACTTTTTTgct  
cgagctggcgaattcc  
>CD\_NM\_001767.2:154  
CgCctGcgagtctGGtatGCTTCAAATGAGTGATGATATTGTTCAAGAGACAATATCATCACTCATTTGAAATTTTTGct  
cgagctggcgaattcc  
>CD\_NM\_001767.2:375  
CgCctGcgagtctGGtatGCTTTGATTTGAAGATTCAAGAGTTCAAGAGACTCTTGAATCTTCAAATCAAATTTTTTgct  
cgagctggcgaattcc  
>CD\_NM\_001767.2:515  
CgCctGcgagtctGGtatGATCAGAGGGTCATCACACACAATTCAAGAGATTGTGTGTGATGACCTCTGAGTTTTTgct  
cgagctggcgaattcc  
>CD\_NM\_001767.2:918  
CgCctGcgagtctGGtatGACGTGTTTCAGCACCAGCCTCAGTTCAAGAGACTGAGGCTGGTGCTGAACACGGTTTTTgct  
cgagctggcgaattcc  
>CD\_NM\_001767.2:672  
CgCctGcgagtctGGtatGAAGCCTCTTGATGGTCTTTGTGTTCAAGAGACACAAAGACCATCAAGAGGCTGTTTTTgct  
cgagctggcgaattcc  
>CD\_NM\_001767.2:668  
CgCctGcgagtctGGtatGAAGGCAGCCTCTTGATGGTCTTTTTCAAGAGAAAGACCATCAAGAGGCTGCCTTTTTTgct  
cgagctggcgaattcc  
>CD\_NM\_001767.2:484  
CgCctGcgagtctGGtatGATGTATCAAGATGGGAAACATCTTCAAGAGAGATGTTTCCATCTTGATACAGTTTTTgct  
cgagctggcgaattcc  
>CD\_NM\_001767.2:437

CgCtGcgagtctGGtatGAAACCCCTGACCTGTGAGGTAATTTCAAGAGAATTACCTCACAGGTCAGGGTTGTTTTTGct  
cgagctggcgaattcc  
>CD\_NM\_000732:143  
CgCtGcgagtctGGtatGATGGGAACACTGCTCTCAGACATTTCAAGAGATGTCTGAGAGCAGTGTCCCACTTTTTTGct  
cgagctggcgaattcc  
>CD\_NM\_000732:187  
CgCtGcgagtctGGtatGCCGCATCCTGGACCCACGAGGATTTCAAGAGATCCTCGTGGGTCCAGGATGCGTTTTTTTGct  
cgagctggcgaattcc  
>CD\_NM\_000732:191  
CgCtGcgagtctGGtatGCTCCTGGACCCACGAGGAATATTTCAAGAGAATATTCCTCGTGGGTCCAGGATTTTTTTGct  
cgagctggcgaattcc  
>CD\_NM\_000732:214  
CgCtGcgagtctGGtatGCAGGTGTAATGGGACAGATATATTCAAGAGATATATCTGTCCCATTACACCTATTTTTTGct  
cgagctggcgaattcc  
>CD\_NM\_000732:253  
CgCtGcgagtctGGtatGCACCGTGCAAGTTCATTATCGATTCAAGAGATCGATAATGAACTTGCACGGTATTTTTTGct  
cgagctggcgaattcc  
>CD\_NM\_000732:312  
CgCtGcgagtctGGtatGCGGCTGGCATCATTGTCACTGATTCAAGAGATCAGTGACAATGATGCCAGCCATTTTTTGct  
cgagctggcgaattcc  
>CD\_NM\_000732:254  
CgCtGcgagtctGGtatGCCCGTGCAAGTTCATTATCGAATTTCAAGAGATTCGATAATGAACTTGCACGGTTTTTTTGct  
cgagctggcgaattcc  
>CD\_NM\_000732.3:93  
CgCtGcgagtctGGtatGAAGAGTGTGTTGTGAATTTGCAATTTCAAGAGAATTGCAATTCACAAACACTCTGTTTTTTGct  
cgagctggcgaattcc  
>CD\_NM\_000732.3:414  
CgCtGcgagtctGGtatGAACACAAGCTCTGTTGAGGAATTTCAAGAGAATTCCTCAACAGAGCTTGTGTGTTTTTTGct  
cgagctggcgaattcc  
>CD\_NM\_000732.3:319  
CgCtGcgagtctGGtatGCTCATTGTCACCTGATGTCATTGTTCAAGAGACAATGACATCAGTGACAATGATTTTTTTGct  
cgagctggcgaattcc  
>CD\_NM\_000732.3:89  
CgCtGcgagtctGGtatGCGGACAGAGTGTGTTGTGAATTTGTTCAAGAGACAATTCACAAACACTCTGTCCTTTTTTTGct  
cgagctggcgaattcc  
>CD\_NM\_000732.3:194  
CgCtGcgagtctGGtatGCGGACCCACGAGGAATATATAGTTCAAGAGACTATATATTCCTCGTGGGTCCATTTTTTTGct  
cgagctggcgaattcc  
>CD\_NM\_000732.3:87  
CgCtGcgagtctGGtatGCGAGGACAGAGTGTGTTGTGAATTTCAAGAGAATTCACAAACACTCTGTCCTATTTTTTTGct  
cgagctggcgaattcc  
>CD\_NM\_000732.3:253  
CgCtGcgagtctGGtatGCCCGTGCAAGTTCATTATCGAATTTCAAGAGATTCGATAATGAACTTGCACGGTTTTTTTGct  
cgagctggcgaattcc  
>CD\_NM\_000732.3:13  
CgCtGcgagtctGGtatGCCGTTTCTCTCTGGCCTGGTACTTTCAAGAGAGTACCAGGCCAGAGAGAAACGTTTTTTTGct  
cgagctggcgaattcc  
>CD\_NM\_000732.3:306  
CgCtGcgagtctGGtatGAACCGTGGCTGGCATCATTGTCTTCAAGAGAGACAATGATGCCAGCCACGGTGTTTTTTTGct  
cgagctggcgaattcc  
>CD\_NM\_000732.3:241  
CgCtGcgagtctGGtatGAACAAAGAACTACCGTGCAAGTTCAAGAGACTTGCACGGTAGATTCTTTGTCTTTTTTTGct  
cgagctggcgaattcc  
>CD\_NM\_000732.3:225

CgCtGcgagtctGGtatGAACAGATATATACAAGGACAAATTCAAGAGATTTGTCCTTGTATATATCTGTCTTTTTGct  
cgagctggcgaattcc  
>CD\_NM\_000732.3:304  
CgCtGcgagtctGGtatGACCACCGTGGCTGGCATCATTGTTCAAGAGACAATGATGCCAGCCACGGTGGCTTTTTGct  
cgagctggcgaattcc  
>CD\_NM\_000732.3:95  
CgCtGcgagtctGGtatGAAGTGTGTTGTAATTGCAATACTTCAAGAGAGTATTGCAATTCACAAACACTCTTTTTGct  
cgagctggcgaattcc  
>CD\_NM\_000732.3:339  
CgCtGcgagtctGGtatGCGCCACTCTGCTCCTTGCTTTGTTCAAGAGACAAAGCAAGGAGCAGAGTGGCATTTTTTGct  
cgagctggcgaattcc  
>CD\_NM\_000732.3:364  
CgCtGcgagtctGGtatGATCTTCTGCTTTGCTGGACATGTTCAAGAGACATGTCCAGCAAAGCAGAAGACTTTTTGct  
cgagctggcgaattcc  
>CD\_NM\_000732.3:315  
CgCtGcgagtctGGtatGCGGCATCATTGTCACTGATGTCTTCAAGAGAGACATCAGTGACAATGATGCCATTTTTTGct  
cgagctggcgaattcc  
>CD\_NM\_000732.3:312  
CgCtGcgagtctGGtatGAGCTGGCATCATTGTCACTGATTTCAAGAGAATCAGTGACAATGATGCCAGCCTTTTTGct  
cgagctggcgaattcc  
>CD\_NM\_000732.3:213  
CgCtGcgagtctGGtatGCAGGTGTAATGGGACAGATATATTCAAGAGATATATCTGTCCCATTACACCTATTTTTGct  
cgagctggcgaattcc  
>CD\_NM\_000732.3:354  
CgCtGcgagtctGGtatGCGCTTTGGGAGTCTTCTGCTTTTTCAAGAGAAAAGCAGAAGACTCCCAAAGCATTTTTTGct  
cgagctggcgaattcc  
>CD\_NM\_000732.3:15  
CgCtGcgagtctGGtatGATTTCTCTCTGGCCTGGTACTGTTCAAGAGACAGTACCAGGCCAGAGAGAACTTTTTGct  
cgagctggcgaattcc  
>CD\_NM\_000732.3:38  
CgCtGcgagtctGGtatGATACCCTTCTCTCGCAAGTGAGTTCAAGAGACTCACTTGCAGAGAGAAGGGTAGTTTTGct  
cgagctggcgaattcc  
>CD\_NM\_000732.3:300  
CgCtGcgagtctGGtatGCCAGCCACCGTGGCTGGCATCTTCAAGAGAGATGCCAGCCACGGTGGCTGGATTTTTGct  
cgagctggcgaattcc  
>CD\_NM\_000732.3:261  
CgCtGcgagtctGGtatGCGTTTCATTATCGAATGTGCCAGTTCAAGAGACTGGCACATTCGATAATGAACTTTTTGct  
cgagctggcgaattcc  
>CD\_NM\_000732.3:143  
CgCtGcgagtctGGtatGCGGGAACACTGCTCTCAGACATTTCAAGAGAATGTCTGAGAGCAGTGTCCCATTTTTGct  
cgagctggcgaattcc  
>CD\_NM\_000732.3:229  
CgCtGcgagtctGGtatGAATATATACAAGGACAAAGAATTTCAAGAGAATCTTTGTCCTTGTATATATCTTTTTGct  
cgagctggcgaattcc  
>CD\_NM\_000732.3:410  
CgCtGcgagtctGGtatGACGACACACAAGCTCTGTTGAGTTCAAGAGACTCAACAGAGCTTGTGTGTCGGTTTTGct  
cgagctggcgaattcc  
>CD\_NM\_000733:128  
CgCtGcgagtctGGtatGCGGGCCTCTGCCTTATCAGTTTCAAGAGAACTGATAAGAGGCAGAGGCCATTTTTGct  
cgagctggcgaattcc  
>CD\_NM\_000733:245  
CgCtGcgagtctGGtatGACCCTCAGTATCCTGGATCTGATTCAAGAGATCAGATCCAGGATACTGAGGGCTTTTTGct  
cgagctggcgaattcc  
>CD\_NM\_000733:296

CgCctGcgagtctGGtatGCAGGCGGTGATGAGGATGATAAATCAAGAGATTATCATCCTCATCACCGCTATTTTTGct  
cgagctggcgaattcc  
>CD\_NM\_000733.2:252  
CgCctGcgagtctGGtatGCATCCTGGATCTGAAATACTATTTCAAGAGAATAGTATTTTCAGATCCAGGATATTTTTGct  
cgagctggcgaattcc  
>CD\_NM\_000733.2:243  
CgCctGcgagtctGGtatGCGCCCTCAGTATCCTGGATCTGTTCAAGAGACAGATCCAGGATACTGAGGGCATTTTTTGct  
cgagctggcgaattcc  
>CD\_NM\_000733.2:189  
CgCctGcgagtctGGtatGCTTACACAGACACCATATAAAGTTCAAGAGACTTTATATGGTGTCTGTGTAATTTTTTGct  
cgagctggcgaattcc  
>CD\_NM\_000733.2:524  
CgCctGcgagtctGGtatGAGGCTTGCTGCTGCTGGTTTACTTCAAGAGAGTAAACCAGCAGCAGCAAGCCCTTTTTGct  
cgagctggcgaattcc  
>CD\_NM\_000733.2:366  
CgCctGcgagtctGGtatGCTGGAGCAAAGTGGTTATTATGTTCAAGAGACATAATAACCACTTTGCTCCAATTTTTGct  
cgagctggcgaattcc  
>CD\_NM\_000733.2:296  
CgCctGcgagtctGGtatGCGGCGGTGATGAGGATGATAAATCAAGAGATTATCATCCTCATCACCGCTTTTTTGct  
cgagctggcgaattcc  
>CD\_NM\_000733.2:318  
CgCctGcgagtctGGtatGCACATAGGCAGTGATGAGGATCTTCAAGAGAGATCCTCATCACTGCCATATGTTTTTTGct  
cgagctggcgaattcc  
>CD\_NM\_000733.2:262  
CgCctGcgagtctGGtatGATGAAATACTATGGCAACACAATTCAAGAGATTGTGTTGCCATAGTATTTTCAGTTTTTGct  
cgagctggcgaattcc  
>CD\_NM\_000733.2:128  
CgCctGcgagtctGGtatGAGGCCTCTGCCCTTATCAGTTTTCAAGAGAACTGATAAGAGGCAGAGGCCCTTTTTGct  
cgagctggcgaattcc  
>CD\_NM\_000733.2:208  
CgCctGcgagtctGGtatGCAGTCTCCATCTCTGGAACCACTTCAAGAGAGTGGTTCAGAGATGGAGACTTTTTTTGct  
cgagctggcgaattcc  
>CD\_NM\_000733.2:291  
CgCctGcgagtctGGtatGCACATAGGCGGTGATGAGGATGTTCAAGAGACATCCTCATCACCGCTATGTTTTTTGct  
cgagctggcgaattcc  
>CD\_NM\_000733.2:124  
CgCctGcgagtctGGtatGCTCTGGGCCCTCTGCCCTTATCTTCAAGAGAGATAAGAGGCAGAGGCCCAGAATTTTTGct  
cgagctggcgaattcc  
>CD\_NM\_000733.2:210  
CgCctGcgagtctGGtatGATCTCCATCTCTGGAACCACAGTTCAAGAGACTGTGGTTCAGAGATGGAGACTTTTTGct  
cgagctggcgaattcc  
>CD\_NM\_000733.2:488  
CgCctGcgagtctGGtatGAGCCACAATTGTCATAGTGGACTTCAAGAGAGTCCACTATGACAATTGTGGCCTTTTTGct  
cgagctggcgaattcc  
>CD\_NM\_000733.2:527  
CgCctGcgagtctGGtatGATTGCTGCTGCTGGTTTACTACTTCAAGAGAGTAGTAAACCAGCAGCAGCAAGTTTTGct  
cgagctggcgaattcc  
>CD\_NM\_000733.2:245  
CgCctGcgagtctGGtatGACCTCAGTATCCTGGATCTGAATTCAGATCCAGGATACTGAGGGTTTTTTGct  
cgagctggcgaattcc  
>CD\_NM\_000733.2:452  
CgCctGcgagtctGGtatGATGTGAGAACTGCATGGAGATGTTCAAGAGACATCTCCATGCAGTTCTCACACTTTTTGct  
cgagctggcgaattcc  
>CD\_NM\_000733.2:698

CgCctGcgagtctGGtatGCGGCCTGAATCAGAGACGCATCTTCAAGAGAGATGCGTCTCTGATTCAGGCCATTTTTGct  
cgagctggcgaattcc  
>CD\_NM\_000733.2:247  
CgCctGcgagtctGGtatGATCAGTATCCTGGATCTGAAATTTCAAGAGAATTTCAAGATCCAGGATACTGAGTTTTGct  
cgagctggcgaattcc  
>CD\_NM\_000733.2:159  
CgCctGcgagtctGGtatGAGGCAAGATGGTAATGAAGAAATTTCAAGAGATTTCTTCATTACCATCTTGCCTTTTGct  
cgagctggcgaattcc  
>CD\_NM\_000733.2:102  
CgCctGcgagtctGGtatGAAGTCGGGCACTCACTGGAGAGTTCAAGAGACTCTCCAGTGAGTGCCCGACTGTTTTGct  
cgagctggcgaattcc  
>CD\_NM\_000733.2:689  
CgCctGcgagtctGGtatGACTGTATTCTGGCCTGAATCAGTTCAAGAGACTGATTCAGGCCAGAATACAGGTTTTGct  
cgagctggcgaattcc  
>CD\_NM\_000733.2:446  
CgCctGcgagtctGGtatGCAGAGTGTGTGAGAACTGCATGTTCAAGAGACATGCAGTTCTCACACTCTTTTTGct  
cgagctggcgaattcc  
>CD\_NM\_000733.2:442  
CgCctGcgagtctGGtatGAGGCAAGAGTGTGTGAGAACTGTTCAAGAGACAGTTCTCACACTCTTGCCTTTTGct  
cgagctggcgaattcc  
>CD\_NM\_000733.2:185  
CgCctGcgagtctGGtatGCGGTATTACACAGACACCATATTTCAAGAGAATATGGTGTCTGTGTAATACCATTTTTGct  
cgagctggcgaattcc  
>CD\_NM\_000733.2:532  
CgCctGcgagtctGGtatGCGCTGCTGGTTTACTACTGGAGTTCAAGAGACTCCAGTAGTAAACCAGCAGCATTTTTGct  
cgagctggcgaattcc  
>CD\_NM\_000733.2:638  
CgCctGcgagtctGGtatGCCACCTGTTCACCAACCCAGACTTCAAGAGAGTCTGGGTTGGGAACAGGTGGTTTTGct  
cgagctggcgaattcc  
>CD\_NM\_000733.2:237  
CgCctGcgagtctGGtatGCTGACATGCCCTCAGTATCCTGTTCAAGAGACAGGATACTGAGGGCATGTCAATTTTTGct  
cgagctggcgaattcc  
>CD\_NM\_000733.2:338  
CgCctGcgagtctGGtatGCCACCTGTCACTGAAGGAATTTTTCAAGAGAAAATTCCTTCAGTGACAGGTGATTTTTGct  
cgagctggcgaattcc  
>CD\_NM\_000733.2:246  
CgCctGcgagtctGGtatGACTCAGTATCCTGGATCTGAAATTTCAAGAGATTTCAAGATCCAGGATACTGAGTTTTGct  
cgagctggcgaattcc  
>CD\_NM\_000073:99  
CgCctGcgagtctGGtatGCGGCCAGTCAATCAAAGGAAATTTCAAGAGATTTCTTTGATTGACTGGGCCATTTTTGct  
cgagctggcgaattcc  
>CD\_NM\_000073:345  
CgCctGcgagtctGGtatGCGTGTGTCAGAACTGCATTGAACTTTCAAGAGAAGTTCAATGCAGTTCTGACACATTTTTGct  
cgagctggcgaattcc  
>CD\_NM\_000073:325  
CgCctGcgagtctGGtatGCCTCCAAGTGTATTACAGAATGTTCAAGAGACATTTCTGTAATACACTTGAGTTTTGct  
cgagctggcgaattcc  
>CD\_NM\_000073:374  
CgCctGcgagtctGGtatGACCACCATATCTGGCTTTCTCTTTCAAGAGAAGAGAAAGCCAGATATGGTGGCTTTTTGct  
cgagctggcgaattcc  
>CD\_NM\_000073:114  
CgCctGcgagtctGGtatGCAGGAAACCACTTGGTTAAGTTTTCAAGAGAACCTTAACCAAGTGGTTTTCTTTTTGct  
cgagctggcgaattcc  
>CD\_NM\_000073.1:99

CgCtGcgagtctGGtatGAGCCCAGTCAATCAAAGGAACTTCAAGAGAGTTTCCTTTGATTGACTGGGCCTTTTTGct  
cgagctggcgaattcc  
>CD\_NM\_000073.1:381  
CgCtGcgagtctGGtatGCTCTGGCTTCTCTTTGCTGAATTCAGCAAGAGAAAGCCAGATTTTTGct  
cgagctggcgaattcc  
>CD\_NM\_000073.1:123  
CgCtGcgagtctGGtatGATTGGTTAAGGTGTATGACTATTTCAAGAGAATAGTCATACACCTTAACCAAGTTTTGct  
cgagctggcgaattcc  
>CD\_NM\_000073.1:290  
CgCtGcgagtctGGtatGCTCAGTGTAAGGATCACAGAATTCAGAGATTCCTGTGATCCTTTACACTGATTTTTGct  
cgagctggcgaattcc  
>CD\_NM\_000073.1:212  
CgCtGcgagtctGGtatGAGAAGATGATCGGCTTCCTAACTTCAAGAGAGTTAGGAAGCCGATCATCTTCCTTTTTGct  
cgagctggcgaattcc  
>CD\_NM\_000073.1:383  
CgCtGcgagtctGGtatGATGGCTTCTCTTTGCTGAAATTTCAAGAGAATTCAGCAAGAGAAAGCCAGTTTTGct  
cgagctggcgaattcc  
>CD\_NM\_000073.1:335  
CgCtGcgagtctGGtatGCTTACAGAATGTGTCAGAAGTTCAGAGACAGTTCTGACACATTCTGTAATTTTTGct  
cgagctggcgaattcc  
>CD\_NM\_000073.1:566  
CgCtGcgagtctGGtatGCCAGTTGAGGAGGAATTGAACTTCAAGAGAGTTCAATTCCTCCTCAACTGGTTTTGct  
cgagctggcgaattcc  
>CD\_NM\_000073.1:133  
CgCtGcgagtctGGtatGATGTATGACTATCAAGAAGATGTTCAAGAGACATCTTCTTGATAGTCATACACTTTTTGct  
cgagctggcgaattcc  
>CD\_NM\_000073.1:142  
CgCtGcgagtctGGtatGCATCAAGAAGATGGTTCGGTACTTCAAGAGAGTACCGAACCATCTTCTTGATATTTTTGct  
cgagctggcgaattcc  
>CD\_NM\_000073.1:483  
CgCtGcgagtctGGtatGAAAGCAGACTCTGTTGCCAATTTCAAGAGAATTTGGGCAACAGAGTCTGCTTGTTTTTGct  
cgagctggcgaattcc  
>CD\_NM\_000073.1:51  
CgCtGcgagtctGGtatGAGGCCTGGCTGTCCTCATCTGTTCAAGAGACAGGATGAGGACAGCCAGGCCTTTTGct  
cgagctggcgaattcc  
>CD\_NM\_000073.1:66  
CgCtGcgagtctGGtatGAATCCTGGCTATCATCTTCTTTTTCAAGAGAAAGAAGATGATAGCCAGGATGTTTTGct  
cgagctggcgaattcc  
>CD\_NM\_000073.1:57  
CgCtGcgagtctGGtatGAGCTGTCTCATCTGGCTATCTTCAAGAGAGATAGCCAGGATGAGGACAGCCTTTTGct  
cgagctggcgaattcc  
>CD\_NM\_000073.1:323  
CgCtGcgagtctGGtatGAACTCCAAGTGTATTACAGAATTTCAAGAGAATTCCTGTAATACACTTGAGTGTTTTTGct  
cgagctggcgaattcc  
>CD\_NM\_000073.1:561  
CgCtGcgagtctGGtatGCGGAAACCAGTTGAGGAGGAATTTCAAGAGAATTCCTCCTCAACTGGTTTCCTTTTTGct  
cgagctggcgaattcc  
>CD\_NM\_000073.1:127  
CgCtGcgagtctGGtatGATTAAGGTGTATGACTATCAAGTTCAGAGACTTGATAGTCATACACCTTAACTTTTGct  
cgagctggcgaattcc  
>CD\_NM\_000073.1:345  
CgCtGcgagtctGGtatGATGTCAGAAGTGCATTGAACTATTCAAGAGATAGTTCAATGCAGTTCTGACACTTTTTGct  
cgagctggcgaattcc  
>CD\_NM\_000073.1:286



CgCctGcgagtctGGtatGCTGTATCAGTGTAAGGATCACTTCAAGAGAGTGATCCTTTACACTGATACATTTTTTGct  
cgagctggcgaattcc  
>CD\_NM\_000073.1:70  
CgCctGcgagtctGGtatGATGGCTATCATTTCTTCAAGTTCAAGAGACTTGAAGAAGAATGATAGCCAGTTTTTGct  
cgagctggcgaattcc  
>CD\_NM\_000073.1:464  
CgCctGcgagtctGGtatGACCAGTCGAGAGCTTCAGACAATTCAGAGATTGTCTGAAGCTCTCGACTGGCTTTTTTGct  
cgagctggcgaattcc  
>CD\_NM\_000073.1:156  
CgCctGcgagtctGGtatGCTCGGTACTTCTGACTTGTGATTTCAAGAGAATCACAAGTCAGAAGTACCGAATTTTTTGct  
cgagctggcgaattcc  
>CD\_NM\_000073.1:221  
CgCctGcgagtctGGtatGCCGGCTTCTTAAGATAATTCAAGAGATTATCTTCAAGTTAGGAAGCCGATTTTTTGct  
cgagctggcgaattcc  
>CD\_NM\_000073.1:489  
CgCctGcgagtctGGtatGAACTCTGTTGCCAATGACCAGTTCAAGAGACTGGTCATTGGGCAACAGAGTCTTTTTTGct  
cgagctggcgaattcc  
>CD\_NM\_000073.1:477  
CgCctGcgagtctGGtatGCTCAGACAAGCAGACTCTGTTGTTCAAGAGACAACAGAGTCTGCTTGTCTGAATTTTTTGct  
cgagctggcgaattcc  
>CD\_NM\_000073.1:495  
CgCctGcgagtctGGtatGATTGCCCAATGACCAGCTCTACTTCAAGAGAGTAGAGCTGGTCATTGGGCAACTTTTTTGct  
cgagctggcgaattcc  
>CD\_NM\_000073.1:216  
CgCctGcgagtctGGtatGAATGATCGGCTTCTTAAGATAATTCAAGAGATTAGTTAGGAAGCCGATCATTTTTTGct  
cgagctggcgaattcc  
>CD\_NM\_000073.1:393  
CgCctGcgagtctGGtatGATTTGCTGAAATCGTCAGCATTTTTCAAGAGAAATGCTGACGATTTAGCAAAGTTTTTGct  
cgagctggcgaattcc  
>CD\_NM\_000616:429  
CgCctGcgagtctGGtatGACCCTGATCATCAAGAATCTTATTCAAGAGATAAGATTCTTGATGATCAGGGTTTTTGct  
cgagctggcgaattcc  
>CD\_NM\_000616:768  
CgCctGcgagtctGGtatGCAGGCCTCCAGCATAGTCTATATTCAAGAGATATAGACTATGCTGGAGGCCTTTTTTTGct  
cgagctggcgaattcc  
>CD\_NM\_000616:820  
CgCctGcgagtctGGtatGCCCCACTCGCCTTTACAGTTGATTCAAGAGATCAACTGTAAAGGCGAGTGGGATTTTTTGct  
cgagctggcgaattcc  
>CD\_NM\_000616.2:1252  
CgCctGcgagtctGGtatGATGGCAGTGTCTGCTGAGTGACTTCAAGAGAGTCACTCAGCAGACACTGCCACTTTTTTGct  
cgagctggcgaattcc  
>CD\_NM\_000616.2:697  
CgCctGcgagtctGGtatGAACATGCACTGTCCTTGCAGAACTTCAAGAGAGTTCTGCAAGACAGTGCATGTCTTTTTTGct  
cgagctggcgaattcc  
>CD\_NM\_000616.2:907  
CgCctGcgagtctGGtatGAACCTTTGACCTGAAGAACAAGTTCAAGAGACTTGTCTTCAAGGTTAAAGGTTTTTGct  
cgagctggcgaattcc  
>CD\_NM\_000616.2:384  
CgCctGcgagtctGGtatGCTCGCGCTGACTCAAGAAGAAGTTCAAGAGACTTCTTCTTGGAGTCAGCGGATTTTTTGct  
cgagctggcgaattcc  
>CD\_NM\_000616.2:1171  
CgCctGcgagtctGGtatGAAGCTTGAACTGGAGAACAAGTTCAAGAGACTTGTCTCCAGTTTCAAGCTTTTTTGct  
cgagctggcgaattcc  
>CD\_NM\_000616.2:460

CgCtGcgagtctGGtatGATCAGATACTTACATCTGTGAATTCAAGAGATTCACAGATGTAAGTATCTGAGTTTTTGct  
cgagctggcgaattcc  
>CD\_NM\_000616.2:436  
CgCtGcgagtctGGtatGAATCAAGAATCTTAAGATAGAATTCAAGAGATTCATCTTAAGATTCTTGATTTTTTGct  
cgagctggcgaattcc  
>CD\_NM\_000616.2:1437  
CgCtGcgagtctGGtatGAAGAGCGGATGTCTCAGATCAATTCAAGAGATTGATCTGAGACATCCGCTCTGTTTTTGct  
cgagctggcgaattcc  
>CD\_NM\_000616.2:1392  
CgCtGcgagtctGGtatGCAGGCATCTTCTTCTGTGTCAAGAGACTGACACAGAAGAAGATGCCTATTTTTTGct  
cgagctggcgaattcc  
>CD\_NM\_000616.2:564  
CgCtGcgagtctGGtatGACCTGACCCTGACCTTGGAGAGTTCAAGAGACTCTCCAAGGTCAGGGTCAGGCTTTTTTGct  
cgagctggcgaattcc  
>CD\_NM\_000616.2:888  
CgCtGcgagtctGGtatGACTCCTCCAAGTCTTGGATCACTTCAAGAGAGTGATCCAAGACTTGGAGGAGTTTTTGct  
cgagctggcgaattcc  
>CD\_NM\_000616.2:403  
CgCtGcgagtctGGtatGCAGCCTTTGGGACCAAGGAACTTCAAGAGAGTTTCTTGGTCCCAAAGCTTTTTTTGct  
cgagctggcgaattcc  
>CD\_NM\_000616.2:1013  
CgCtGcgagtctGGtatGCTGCCTCAGTATGCTGGCTCTGTTCAAGAGACAGAGCCAGCATACTGAGGCAATTTTTTGct  
cgagctggcgaattcc  
>CD\_NM\_000616.2:1102  
CgCtGcgagtctGGtatGAAGAGCCACTCAGCTCCAGAAATTCAGAGATTTCTGGAGCTGAGTGGCTCTTTTTTGct  
cgagctggcgaattcc  
>CD\_NM\_000616.2:1453  
CgCtGcgagtctGGtatGAATCAAGAGACTCCTCAGTGAGTTCAAGAGACTCACTGAGGAGTCTTTGATTTTTTGct  
cgagctggcgaattcc  
>CD\_NM\_000616.2:342  
CgCtGcgagtctGGtatGCTCAGGGCTCCTTCTTAATAATTCAAGAGATTAGTTAAGAAGGAGCCCTGATTTTTTGct  
cgagctggcgaattcc  
>CD\_NM\_000616.2:1284  
CgCtGcgagtctGGtatGCCCTGCTGGAATCCAACATCAATTCAAGAGATTGATGTTGGATTCCAGCAGGATTTTTTGct  
cgagctggcgaattcc  
>CD\_NM\_000616.2:434  
CgCtGcgagtctGGtatGCTCATCAAGAATCTTAAGATAGTTCAAGAGACTATCTTAAGATTCTTGATGATTTTTTGct  
cgagctggcgaattcc  
>CD\_NM\_000616.2:772  
CgCtGcgagtctGGtatGATCCAGCATAGTCTATAAGAAATTCAGAGATTTCTTATAGACTATGCTGGAGTTTTTGct  
cgagctggcgaattcc  
>CD\_NM\_000616.2:325  
CgCtGcgagtctGGtatGAATAAAGATCTGGGAAATCAGTTCAAGAGACTGATTTCCAGAATCTTATCTTTTTTGct  
cgagctggcgaattcc  
>CD\_NM\_000616.2:1042  
CgCtGcgagtctGGtatGAACCCTGGCCCTTGAAGCGAAATTCAGAGATTTTCGCTTCAAGGGCCAGGGTGTTTTTTGct  
cgagctggcgaattcc  
>CD\_NM\_000616.2:1489  
CgCtGcgagtctGGtatGATGCCCTACCGGTTTCAGAAGTTCAAGAGACTTCTGAAACCGGTGAGGGCACTTTTTGct  
cgagctggcgaattcc  
>CD\_NM\_000616.2:535  
CgCtGcgagtctGGtatGATCTGACACCCACCTGCTTCAAGAGACTGAAGCAGGTGGGTGTCAGAGTTTTTGct  
cgagctggcgaattcc  
>CD\_NM\_000616.2:211

CgCtGcgagtctGGtatGCGCAGCCACTCAGGGAAAGAAATTCAAGAGATTTCTTTCCCTGAGTGGCTGCTTTTTTgct  
cgagctggcgaattcc  
>CD\_NM\_000616.2:518  
CgCtGcgagtctGGtatGCTCGGATTGACTGCCAACTCTGTTCAAGAGACAGAGTTGGCAGTCAATCCGAATTTTTGct  
cgagctggcgaattcc  
>CD\_NM\_000616.2:429  
CgCtGcgagtctGGtatGACCTGATCATCAAGAATCTTAATTCAAGAGATTAAGATTCTTGATGATCAGGGTTTTGct  
cgagctggcgaattcc  
>CD\_NM\_000616.2:507  
CgCtGcgagtctGGtatGCATTGCTAGTGTTCGGATTGACTTCAAGAGAGTCAATCCGAACACTAGCAATTTTTTgct  
cgagctggcgaattcc  
>CD\_NM\_000616.2:562  
CgCtGcgagtctGGtatGAAGCCTGACCCTGACCTTGGAGTTCAAGAGACTCCAAGGTCAGGGTCAGGCTTTTTGct  
cgagctggcgaattcc  
>CD\_NM\_000616.2:876  
CgCtGcgagtctGGtatGAGGAGAGGGCTTCCCTCCAATTCAAGAGATTGGAGGAGGAAGCCCTCTCCGTTTTGct  
cgagctggcgaattcc  
>CD\_NM\_000616.2:520  
CgCtGcgagtctGGtatGAGGATTGACTGCCAACTCTGACTTCAAGAGAGTCAGAGTTGGCAGTCAATCCGTTTTGct  
cgagctggcgaattcc  
>CD\_NM\_014207:1126  
CgCtGcgagtctGGtatGCGGGAGAGAAATTCCTACTGCATTCAAGAGATGCAGTAGGAATTTCTCTCCATTTTTGct  
cgagctggcgaattcc  
>CD\_NM\_014207:676  
CgCtGcgagtctGGtatGATCCAGTGTGGCTCCTTCTTGATTCAAGAGATCAAGAAGGAGCCACACTGGAGTTTTGct  
cgagctggcgaattcc  
>CD\_NM\_014207:758  
CgCtGcgagtctGGtatGCGCCCTTGCCAATCCAATGGAATTCAAGAGATTCATTGGATTGGCAAGGGCTTTTTGct  
cgagctggcgaattcc  
>CD\_NM\_014207:1114  
CgCtGcgagtctGGtatGCGCCACGAACTTTGGGAGAGAATTCAAGAGATTTCTCTCCAAAGTTCGTGGCATTTTTTGct  
cgagctggcgaattcc  
>CD\_NM\_014207.2:676  
CgCtGcgagtctGGtatGCCAGTGTGGCTCCTTCTTGAATTCAAGAGATTCAGAAGGAGCCACACTGGATTTTTGct  
cgagctggcgaattcc  
>CD\_NM\_014207.2:1126  
CgCtGcgagtctGGtatGAGGAGAGAAATTCCTACTGCAATTCAAGAGATTGCAGTAGGAATTTCTCTCCCTTTTTGct  
cgagctggcgaattcc  
>CD\_NM\_014207.2:1515  
CgCtGcgagtctGGtatGAACAGTACTATGATCTGCATGTTCAAGAGACATGCAGATCATAGTCACTGTCTTTTTGct  
cgagctggcgaattcc  
>CD\_NM\_014207.2:232  
CgCtGcgagtctGGtatGAGCACATGGTTTGCAGCCAGAGTTCAAGAGACTCTGGCTGCAAACCATGTGCCTTTTTGct  
cgagctggcgaattcc  
>CD\_NM\_014207.2:650  
CgCtGcgagtctGGtatGACTGGAGAACTTCTCTGCAACTTCAAGAGAGTTGCAGAGGAAGTTCTCCAGTTTTGct  
cgagctggcgaattcc  
>CD\_NM\_014207.2:536  
CgCtGcgagtctGGtatGAAGGCTGCAGCTGGTGGCACAGTTCAAGAGACTGTGCCACCAGCTGCAGCCTTTTTGct  
cgagctggcgaattcc  
>CD\_NM\_014207.2:1401  
CgCtGcgagtctGGtatGACCTCCCACGTGGATAACGAATTTCAAGAGAATTCGTTATCCACGTGGGAGGCTTTTTGct  
cgagctggcgaattcc  
>CD\_NM\_014207.2:1025

CgCctGcgagtctGGtatGATGTGGCAGCGTCAACTCCTATTTCAAGAGAATAGGAGTTGACGCTGCCACACTTTTTGct  
cgagctggcgaattcc  
>CD\_NM\_014207.2:397  
CgCctGcgagtctGGtatGCGGGCTCCTTCTCCAAGACTGCAGTTCAAGAGACTGCAGTTGGAGAAGGAGCCATTTTTGct  
cgagctggcgaattcc  
>CD\_NM\_014207.2:474  
CgCctGcgagtctGGtatGCAGACAACACCTCCAACGACAATTCAAGAGATTGTCGTTGGAGGTGTTGCTTTTTTTGct  
cgagctggcgaattcc  
>CD\_NM\_014207.2:1509  
CgCctGcgagtctGGtatGCCCTCCGACAGTGACTATGATCTTCAAGAGAGATCATAGTCACTGTCGGAGGATTTTTGct  
cgagctggcgaattcc  
>CD\_NM\_014207.2:641  
CgCctGcgagtctGGtatGAACCCAGGACCTGGAGAACTTCTTCAAGAGAGAAGTTCTCCAGGTCTGGGTCTTTTTGct  
cgagctggcgaattcc  
>CD\_NM\_014207.2:403  
CgCctGcgagtctGGtatGACTTCTCCAAGTGCAGCCACAGTTCAAGAGACTGTGGCTGCAGTTGGAGAAGTTTTGct  
cgagctggcgaattcc  
>CD\_NM\_014207.2:1265  
CgCctGcgagtctGGtatGCGCCTACAAGAAGCTAGTGAAGTTCAAGAGACTTCACTAGCTTCTTGTAGGCATTTTTGct  
cgagctggcgaattcc  
>CD\_NM\_014207.2:758  
CgCctGcgagtctGGtatGACCCTTGCCAATCCAATGGAAGTTCAAGAGACTTCCATTGGATTGGCAAGGGCTTTTTGct  
cgagctggcgaattcc  
>CD\_NM\_014207.2:1443  
CgCctGcgagtctGGtatGCCCCGCTGTCAGCTTATCCAGTTCAAGAGACTGGATAAGCTGACAGGCGGGATTTTTGct  
cgagctggcgaattcc  
>CD\_NM\_014207.2:1397  
CgCctGcgagtctGGtatGAACAGCCTCCCACGTGGATAACTTCAAGAGAGTTATCCACGTGGGAGGCTGTGTTTTGct  
cgagctggcgaattcc  
>CD\_NM\_014207.2:853  
CgCctGcgagtctGGtatGCTGCCCTCCTTTGCTCAGTTTTTTCAAGAGAAAACCTGAGCAAAGGAGGGCAATTTTTGct  
cgagctggcgaattcc  
>CD\_NM\_014207.2:172  
CgCctGcgagtctGGtatGAGCTCACCCGTTCCAAGTCAAGAGATTGAGTTGGAACGGGTGAGCCTTTTTGct  
cgagctggcgaattcc  
>CD\_NM\_014207.2:391  
CgCctGcgagtctGGtatGAACAACCTGGGCTCCTTCTCCAATTCAAGAGATTGGAGAAGGAGCCCAGTTGCTTTTTGct  
cgagctggcgaattcc  
>CD\_NM\_014207.2:1114  
CgCctGcgagtctGGtatGACCACGAACCTTGGGAGAGAAATTCAAGAGATTCTCTCCCAAAGTTCGTGGCTTTTTGct  
cgagctggcgaattcc  
>CD\_NM\_014207.2:1195  
CgCctGcgagtctGGtatGAAGGCACGGTGGCAAGCATCATTTCAAGAGAATGATGCTTGCCACCGTGCCTGTTTTGct  
cgagctggcgaattcc  
>CD\_NM\_014207.2:803  
CgCctGcgagtctGGtatGACTGGAGCATGCTTCAAGAAATTCAAGAGATTCTTGAAGCAATGCTCCAGTTTTGct  
cgagctggcgaattcc  
>CD\_NM\_014207.2:680  
CgCctGcgagtctGGtatGATGTGGCTCCTTCTTGAAGCATTTCAAGAGAATGCTTCAAGAAGGAGCCACACTTTTTGct  
cgagctggcgaattcc  
>CD\_NM\_014207.2:1193  
CgCctGcgagtctGGtatGAGCAGGCACGGTGGCAAGCATCTTCAAGAGAGATGCTTGCCACCGTGCCTGCGTTTTGct  
cgagctggcgaattcc  
>CD\_NM\_014207.2:575

CgCctGcgagtctGGtatGCGCCGGCGTGGTGGAGTTCTACTTCAAGAGAGTAGAACTCCACCACGCCGGCATTMTTGGct  
cgagctggcgaattcc  
>CD\_NM\_014207.2:151  
CgCctGcgagtctGGtatGCTGACCCAGATTTCCAGGCAAGTTCAAGAGACTTGCCTGGAAATCTGGGTCATMTTGGct  
cgagctggcgaattcc  
>CD\_NM\_014207.2:141  
CgCctGcgagtctGGtatGATCAGCTGGTATGACCCAGATMTTCAAGAGAAATCTGGGTCATAACCAGCTGAGMTTGGct  
cgagctggcgaattcc  
>CD\_NM\_014207.2:1511  
CgCctGcgagtctGGtatGATCCGACAGTGACTATGATCTGTTCAAGAGACAGATCATAGTCACTGTCGGAGMTTGGct  
cgagctggcgaattcc  
>CD\_NM\_006725:1499  
CgCctGcgagtctGGtatGACCGGCAGGGAGCAATAGCTATMTTCAAGAGAATAGCTATTGCTCCCTGCCGGGMTTGGct  
cgagctggcgaattcc  
>CD\_NM\_006725:1653  
CgCctGcgagtctGGtatGATGGCCCTGACCACCTTCTACATTCAAGAGATGTAGAAGGTGGTCAGGGCCACTMTTGGct  
cgagctggcgaattcc  
>CD\_NM\_006725:790  
CgCctGcgagtctGGtatGCGGCCCTGCCCGCTTGCACMTTTCAGAGAAAGTGCAAGCCGGGCAGGGCMTTGGct  
cgagctggcgaattcc  
>CD\_NM\_006725:1420  
CgCctGcgagtctGGtatGCAGCCTTCATCCTCTTGAGAATMTTCAAGAGAATCTCAAGAGGATGAAGGCTATMTTGGct  
cgagctggcgaattcc  
>CD\_NM\_006725:1305  
CgCctGcgagtctGGtatGATCACTATAGAATCTTCTGTGATTCAAGAGATCACAGAAGATTCTATAGTGACTMTTGGct  
cgagctggcgaattcc  
>CD\_NM\_006725:1428  
CgCctGcgagtctGGtatGCTCCTCTTGAGAATTAAGGAATTCAGAGATTCCTTTAATTCTCAAGAGGATMTTGGct  
cgagctggcgaattcc  
>CD\_NM\_006725.2:1283  
CgCctGcgagtctGGtatGATCCCTGCAAGTGTTCAGACAGTTCAAGAGACTGTCTGAACACTTGCAGGGACTMTTGGct  
cgagctggcgaattcc  
>CD\_NM\_006725.2:1656  
CgCctGcgagtctGGtatGACCTGACCACCTTCTACAATCTTCAAGAGAGAATGTAGAAGGTGGTCAGGGMTTGGct  
cgagctggcgaattcc  
>CD\_NM\_006725.2:1422  
CgCctGcgagtctGGtatGACTTCATCCTCTTGAGAATTAATTCAGAGATTAATTCTCAAGAGGATGAAGGMTTGGct  
cgagctggcgaattcc  
>CD\_NM\_006725.2:1610  
CgCctGcgagtctGGtatGAACTCAGACTATGAGCACTATGTTCAAGAGACATAGTGCTCATAGTCTGAGTCTMTTGGct  
cgagctggcgaattcc  
>CD\_NM\_006725.2:1032  
CgCctGcgagtctGGtatGATGACAGTGAGTGGTACCCATCTTCAAGAGAGATGGGTACCACTCACTGTCACMTTGGct  
cgagctggcgaattcc  
>CD\_NM\_006725.2:1612  
CgCctGcgagtctGGtatGATCAGACTATGAGCACTATGACTTCAAGAGAGTCATAGTGCTCATAGTCTGAGMTTGGct  
cgagctggcgaattcc  
>CD\_NM\_006725.2:1419  
CgCctGcgagtctGGtatGCAGCCTTCATCCTCTTGAGAATMTTCAAGAGAATCTCAAGAGGATGAAGGCTATMTTGGct  
cgagctggcgaattcc  
>CD\_NM\_006725.2:1307  
CgCctGcgagtctGGtatGCCTATAGAATCTTCTGTGACAGTTCAAGAGACTGTACAGAAGATTCTATAGMTTGGct  
cgagctggcgaattcc  
>CD\_NM\_006725.2:1294

CgCctGcgagtctGGtatGCGTTCAGACAGTCACTATAGAATTCAAGAGATTCTATAGTACTGTCTGAACATTTTTGct  
cgagctggcgaattcc  
>CD\_NM\_006725.2:1071  
CgCctGcgagtctGGtatGACCAGTCCTTGGGCTGTGGAACCTCAAGAGAGTCCACAGCCCAAGGACTGGCTTTTTGct  
cgagctggcgaattcc  
>CD\_NM\_006725.2:1296  
CgCctGcgagtctGGtatGCTCAGACAGTCACTATAGAATCTTCAAGAGAGATTCTATAGTACTGTCTGAATTTTTGct  
cgagctggcgaattcc  
>CD\_NM\_006725.2:256  
CgCctGcgagtctGGtatGCGCAGAGAGTGAGCTCTGGGAGTTCAAGAGACTCCCAGAGCTCACTCTCTGCATTTTTGct  
cgagctggcgaattcc  
>CD\_NM\_006725.2:1340  
CgCctGcgagtctGGtatGCACAAGGAATCTCGGGAGCTAATTCAAGAGATTAGCTCCCGAGATTCTTGTTTTTTGct  
cgagctggcgaattcc  
>CD\_NM\_006725.2:2118  
CgCctGcgagtctGGtatGATCAGCCTGACTCCACCGACAATTCAAGAGATTGTCGGTGGAGTCAGGCTGAGTTTTGct  
cgagctggcgaattcc  
>CD\_NM\_006725.2:1164  
CgCctGcgagtctGGtatGCGCTCACCCCTCTCCAAGTCTTCAAGAGAGAGCAGTTGGAGAGGGTGAGCTTTTTGct  
cgagctggcgaattcc  
>CD\_NM\_006725.2:1681  
CgCctGcgagtctGGtatGACGGCATCGGGTACAGATGAGTTCAAGAGACTCATCTGTGACCCGATGCCGTTTTGct  
cgagctggcgaattcc  
>CD\_NM\_006725.2:1405  
CgCctGcgagtctGGtatGATCCCTCATCTTCATAGCCTTCTTCAAGAGAGAAGGCTATGAAGATGAGGGAGTTTTGct  
cgagctggcgaattcc  
>CD\_NM\_006725.2:679  
CgCctGcgagtctGGtatGACGCGTGGAGATGCTGGAGCATTTC AAGAGAATGCTCCAGCATCTCCACGCGTTTTGct  
cgagctggcgaattcc  
>CD\_NM\_006725.2:1420  
CgCctGcgagtctGGtatGCGCCTTCATCTCTTGAGAATTTTCAAGAGAAATCTCAAGAGGATGAAGGTTTTGct  
cgagctggcgaattcc  
>CD\_NM\_006725.2:1131  
CgCctGcgagtctGGtatGACGGCAGGATGTACTACTCATGTTCAAGAGACATGAGTAGTACATCTGCCGTTTTGct  
cgagctggcgaattcc  
>CD\_NM\_006725.2:177  
CgCctGcgagtctGGtatGCCGGGATCACTGGATTGCTGACTTCAAGAGAGTCAGCAATCCAGTGATCCCGATTTTTGct  
cgagctggcgaattcc  
>CD\_NM\_006725.2:1119  
CgCctGcgagtctGGtatGACCACTCCTTGTCCGGCAGGATTTCAAGAGAATCCTGCCGACAAGGAGTGGGTTTTGct  
cgagctggcgaattcc  
>CD\_NM\_006725.2:1065  
CgCctGcgagtctGGtatGCGCTCTGCCAGTCCTTGGGCTGTTCAAGAGACAGCCCAAGGACTGGCAGAGCATTGct  
cgagctggcgaattcc  
>CD\_NM\_006725.2:1277  
CgCctGcgagtctGGtatGACCGAAGTCCCTGCAAGTGTCTTCAAGAGAGAACACTTGCAGGGACTTCGGTTTTGct  
cgagctggcgaattcc  
>CD\_NM\_006725.2:1249  
CgCctGcgagtctGGtatGCTCCCGGAGTTTGCACAATCTGTTCAAGAGACAGATTGTGCAAACCTCCGGGAATTTTTGct  
cgagctggcgaattcc  
>CD\_NM\_006725.2:300  
CgCctGcgagtctGGtatGATCTGACAAACGGGAGCAGCAGTTCAAGAGACTGCTGCTCCCGTTTGTGAGACTTTTTGct  
cgagctggcgaattcc  
>CD\_NM\_006725.2:1654

CgCctGcgagtctGGtatGAGCCCTGACCACCTTCTACAATTTCAAGAGAATTGTAGAAGGTGGTCAGGGCCTTTTTTGct  
cgagctggcgaattcc  
>CD\_NM\_006137:449  
CgCctGcgagtctGGtatGCGCCAGGCCATCACGGAGGTCATTCAAGAGATGACCTCCGTGATGGCCTGGCATTTTTTTGct  
cgagctggcgaattcc  
>CD\_NM\_006137:651  
CgCctGcgagtctGGtatGAGGCCCTGGCGGTGATCTCCTTTTTCAAGAGAAAGGAGATCACCGCCAGGGCCGTTTTTGct  
cgagctggcgaattcc  
>CD\_NM\_006137:730  
CgCctGcgagtctGGtatGCCTGTGCTCGTGGCGGGATAAGTTCAAGAGACTTATCCCGCCACGAGCACAGTTTTTTTGct  
cgagctggcgaattcc  
>CD\_NM\_006137:756  
CgCctGcgagtctGGtatGAGGCGGCATGTGTGGTGTACGATTCAAGAGATCGTACACCACACATGCCGCCGTTTTTTGct  
cgagctggcgaattcc  
>CD\_NM\_006137:228  
CgCctGcgagtctGGtatGCGGGAGCCTCCGTCAACATCACTTCAAGAGAGTGATGTTGACGGAGGCTCCATTTTTTGct  
cgagctggcgaattcc  
>CD\_NM\_006137:708  
CgCctGcgagtctGGtatGCGGCGAGGACACAGATAAAGAATTCAAGAGATTCTTTATCTGTGTCTCGCCATTTTTTGct  
cgagctggcgaattcc  
>CD\_NM\_006137:704  
CgCctGcgagtctGGtatGATGCTGGCGAGGACACAGATAAATTCAAGAGATTATCTGTGTCTCGCCAGCACTTTTTTGct  
cgagctggcgaattcc  
>CD\_NM\_006137:733  
CgCctGcgagtctGGtatGATGCTCGTGGCGGGATAAGAATTTCAAGAGAATTCTTATCCCGCCACGAGCACTTTTTTGct  
cgagctggcgaattcc  
>CD\_NM\_006137.6:486  
CgCctGcgagtctGGtatGAACCCTGGTCTGGTGACAGAGTTCAAGAGACTCTGTACCAGGACCAGGGTGTTTTTTGct  
cgagctggcgaattcc  
>CD\_NM\_006137.6:603  
CgCctGcgagtctGGtatGAACAGCCTCTGCCCTCCCTGACTTCAAGAGAGTCAGGGAGGGCAGAGGCTGTCTTTTTTGct  
cgagctggcgaattcc  
>CD\_NM\_006137.6:651  
CgCctGcgagtctGGtatGAGCCCTGGCGGTGATCTCCTTCTTCAAGAGAGAAGGAGATCACCGCCAGGGCCTTTTTTGct  
cgagctggcgaattcc  
>CD\_NM\_006137.6:733  
CgCctGcgagtctGGtatGCGCTCGTGGCGGGATAAGAATTTTTCAAGAGAAATCTTATCCCGCCACGAGCATTTTTTTGct  
cgagctggcgaattcc  
>CD\_NM\_006137.6:374  
CgCctGcgagtctGGtatGCCTTCTCAGGGTCCCAGGACAATTCAAGAGATTGTCCTGGGACCTGAGAAGTTTTTTTGct  
cgagctggcgaattcc  
>CD\_NM\_006137.6:728  
CgCctGcgagtctGGtatGCACTGTGCTCGTGGCGGGATAAATTCAAGAGATTATCCCGCCACGAGCACAGTTTTTTTGct  
cgagctggcgaattcc  
>CD\_NM\_006137.6:708  
CgCctGcgagtctGGtatGAGCGAGGACACAGATAAAGAAATTCAAGAGATTCTTTATCTGTGTCTCGCCTTTTTTGct  
cgagctggcgaattcc  
>CD\_NM\_006137.6:224  
CgCctGcgagtctGGtatGACGTGGGAGCCTCCGTCAACATTTCAAGAGAATGTTGACGGAGGCTCCCACGGTTTTTTTGct  
cgagctggcgaattcc  
>CD\_NM\_006137.6:456  
CgCctGcgagtctGGtatGAATCACGGAGGTCAATGTCTACTTCAAGAGAGTAGACATTGACCTCCGTGATTTTTTTGct  
cgagctggcgaattcc  
>CD\_NM\_006137.6:704

CgCctGcgagtctGGtatGCGCTGGCGAGGACACAGATAAAATTC AAGAGATTTATCTGTGTCTCGCCAGCATT TTTTGct  
cgagctggcgaattcc  
>CD\_NM\_006137.6:756  
CgCctGcgagtctGGtatGAGCGGCATGTGTGGTGTACGAGTTCAAGAGACTCGTACACCACACATGCCGCCTTT TTTGct  
cgagctggcgaattcc  
>CD\_NM\_006137.6:117  
CgCctGcgagtctGGtatGACCTCCGAGGCTCCTGCTGCTGTTCAAGAGACAGCAGCAGGAGCCTCGGAGGCTTT TTTGct  
cgagctggcgaattcc  
>CD\_NM\_006137.6:509  
CgCctGcgagtctGGtatGCACAGTCCCAAGGATGGCACAGTTCAAGAGACTGTGCCATCCTTGGGACTGTT TTTTTGct  
cgagctggcgaattcc  
>CD\_NM\_006137.6:384  
CgCctGcgagtctGGtatGATCCCAGGACAACCTGACTATCTTCAAGAGAGATAGTCAGGTTGTCTGGGACTTT TTTGct  
cgagctggcgaattcc  
>CD\_NM\_006137.6:239  
CgCctGcgagtctGGtatGCCAACATCACCTGCTCCACCAGTTCAAGAGACTGGTGGAGCAGGTGATGTTGATTT TTTGct  
cgagctggcgaattcc  
>CD\_NM\_006137.6:266  
CgCctGcgagtctGGtatGACCTGCGTGGGATCTACCTGAGTTCAAGAGACTCAGGTAGATCCCACGCAGGCTTT TTTGct  
cgagctggcgaattcc  
>CD\_NM\_006137.6:365  
CgCctGcgagtctGGtatGACCGCATCGACTTCTCAGGGTCTTCAAGAGAGACCCTGAGAAGTCGATGCGGCTTT TTTGct  
cgagctggcgaattcc  
>CD\_NM\_006137.6:499  
CgCctGcgagtctGGtatGATGACAGAGGAACAGTCCCAAGTTCAAGAGACTTGGGACTGTTCTCTGTCACTTT TTTGct  
cgagctggcgaattcc  
>CD\_NM\_006137.6:449  
CgCctGcgagtctGGtatGACCAGGCCATCACGGAGGTCAATTCAAGAGATTGACCTCCGTGATGGCTGGCTTT TTTGct  
cgagctggcgaattcc  
>CD\_NM\_006137.6:236  
CgCctGcgagtctGGtatGACGTCAACATCACCTGCTCCACTTCAAGAGAGTGGAGCAGGTGATGTTGACGGTT TTTGct  
cgagctggcgaattcc  
>CD\_NM\_006137.6:174  
CgCctGcgagtctGGtatGAGCCCTGGCTGCCAAGAGGTGTTCAAGAGACACCTCTTGGGCAGCCAGGGCTTT TTTGct  
cgagctggcgaattcc  
>CD\_NM\_006137.6:601  
CgCctGcgagtctGGtatGAAGACAGCCTCTGCCCTCCCTGTTCAAGAGACAGGGAGGGCAGAGGCTGTCTGT TTTTTGct  
cgagctggcgaattcc  
>CD\_NM\_006137.6:732  
CgCctGcgagtctGGtatGATGCTCGTGGCGGGATAAGAATTTCAAGAGAATTCTTATCCCGCCACGAGCACTTT TTTGct  
cgagctggcgaattcc  
>CD\_NM\_006137.6:264  
CgCctGcgagtctGGtatGAGGCCTGCGTGGGATCTACCTGTTCAAGAGACAGGTAGATCCCACGCAGGCCCTTT TTTGct  
cgagctggcgaattcc  
>CD\_NM\_006137.6:503  
CgCctGcgagtctGGtatGAAGAGGAACAGTCCCAAGGATGTTCAAGAGACATCCTTGGGACTGTTCTCTGT TTTTTGct  
cgagctggcgaattcc  
>CD\_NM\_001768.4:746  
CgCctGcgagtctGGtatGCACCGAAGACGTGTTTGCAAATTTCAAGAGAATTTGCAAACACGTCTTCGGTT TTTTTGct  
cgagctggcgaattcc  
>CD\_NM\_001768.4:223  
CgCctGcgagtctGGtatGAGGCGAGACAGTGGAGCTGAAGTTCAAGAGACTTCAGCTCCACTGTCTCGCCCTTT TTTGct  
cgagctggcgaattcc  
>CD\_NM\_001768.4:313



CgCctGcgagtctGGtatGAAGTCCCACCTTCCTCCTATACTTCAAGAGAGTATAGGAGGAAGGTGGGACTGTTTTTGct  
cgagctggcgaattcc  
>CD\_NM\_001768.4:712  
CgCctGcgagtctGGtatGATCACTGGTTATCACCCCTTACTTCAAGAGAGTAAAGGGTGATAACCAGTGACTTTTTTGct  
cgagctggcgaattcc  
>CD\_NM\_001768.4:244  
CgCctGcgagtctGGtatGATGCCAGGTGCTGCTGTCCAACCTTCAAGAGAGTTGGACAGCAGCACCTGGCACTTTTTTGct  
cgagctggcgaattcc  
>CD\_NM\_001768.4:229  
CgCctGcgagtctGGtatGAACAGTGGAGCTGAAGTGCCAGTTCAAGAGACTGGCACTTCAGCTCCACTGTCTTTTTTGct  
cgagctggcgaattcc  
>CD\_NM\_001768.4:702  
CgCctGcgagtctGGtatGCCCTTCTCCTGTCACCTGGTTATTTCAAGAGAATAACCAGTGACAGGAGAAGGATTTTTTGct  
cgagctggcgaattcc  
>CD\_NM\_001768.4:468  
CgCctGcgagtctGGtatGACCTGAGCAACTCCATCATGTATTCAAGAGATACATGATGGAGTTGCTCAGGGTTTTTGct  
cgagctggcgaattcc  
>CD\_NM\_001768.4:249  
CgCctGcgagtctGGtatGCGGTGCTGCTGTCCAACCCGACTTCAAGAGAGTCGGGTTGGACAGCAGCACCTTTTTTGct  
cgagctggcgaattcc  
>CD\_NM\_001768.4:505  
CgCctGcgagtctGGtatGACCGGTCTTCTGCCAGCGAAGTTCAAGAGACTTCGCTGGCAGGAAGACCGGCTTTTTTGct  
cgagctggcgaattcc  
>CD\_NM\_001768.4:199  
CgCctGcgagtctGGtatGACCGCTGGATCGGACCTGGAACCTTCAAGAGAGTTCCAGGTCCGATCCAGCGGCTTTTTTGct  
cgagctggcgaattcc  
>CD\_NM\_001768.4:375  
CgCctGcgagtctGGtatGACCAGCGGTTCTCGGGCAAGAGTTCAAGAGACTCTTGCCCGAGAACCCTGGGTTTTTGct  
cgagctggcgaattcc  
>CD\_NM\_001768.4:148  
CgCctGcgagtctGGtatGACCGCTGGCCTTGTGCTCCACTTCAAGAGAGTGGAGCAGCAAGGCCAGCGGCTTTTTTGct  
cgagctggcgaattcc  
>CD\_NM\_001768.4:472  
CgCctGcgagtctGGtatGAAGCAACTCCATCATGTACTTCTTCAAGAGAGAAGTACATGATGGAGTTGCTTTTTTGct  
cgagctggcgaattcc  
>CD\_NM\_001768.4:648  
CgCctGcgagtctGGtatGCGGACTTCGCCTGTGATATCTATTCAAGAGATAGATATCACAGGCGAAGTCCATTTTTTGct  
cgagctggcgaattcc  
>CD\_NM\_001768.4:424  
CgCctGcgagtctGGtatGAAGCGACTTCCGCCGAGAGAACTTCAAGAGAGTTCTCTCGGCGGAAGTCGCTTTTTTGct  
cgagctggcgaattcc  
>CD\_NM\_001768.4:645  
CgCctGcgagtctGGtatGAGCTGGACTTCGCCTGTGATATTTCAAGAGAATATCACAGGCGAAGTCCAGCCTTTTTTGct  
cgagctggcgaattcc  
>CD\_NM\_001768.4:373  
CgCctGcgagtctGGtatGAACCCAGCGGTTCTCGGGCAAGTTCAAGAGACTTGCCCGAGAACCCTGGGTGTTTTTGct  
cgagctggcgaattcc  
>CD\_NM\_001768.4:436  
CgCctGcgagtctGGtatGACGAGAGAACGAGGGCTACTATTTCAAGAGAATAGTAGCCCTCGTTCTCTCGTTTTTGct  
cgagctggcgaattcc  
>CD\_NM\_001768.4:438  
CgCctGcgagtctGGtatGAAGAGAACGAGGGCTACTATTTTTCAAGAGAAAATAGTAGCCCTCGTTCTCTTTTTTGct  
cgagctggcgaattcc  
>CD\_NM\_001768.4:777

CgCctGcgagtctGGtatGATGTGGTCAAATCGGGAGACAATTCAAGAGATTGTCTCCCGATTTGACCACAGTTTTTGct  
cgagctggcgaattcc  
>CD\_NM\_001768.4:493  
CgCctGcgagtctGGtatGAAGCCACTTCGTGCCGGTCTTCTTCAAGAGAGAAGACCGGCACGAAGTGGCTTTTTTGct  
cgagctggcgaattcc  
>CD\_NM\_001768.4:798  
CgCctGcgagtctGGtatGCGCCCAGCCTTTCGGCGAGATATTCAAGAGATATCTCGCCGAAAGGCTGGGCTTTTTTGct  
cgagctggcgaattcc  
>CD\_NM\_001768.4:718  
CgCctGcgagtctGGtatGAGTTATCACCCCTTACTGCAACTTCAAGAGAGTTGCAGTAAAGGGTGATAACCTTTTTGct  
cgagctggcgaattcc  
>CD\_NM\_001768.4:714  
CgCctGcgagtctGGtatGAACTGGTTATCACCCCTTACTGTTCAAGAGACAGTAAAGGGTGATAACCAGTTTTTGct  
cgagctggcgaattcc  
>CD\_NM\_001768.4:412  
CgCctGcgagtctGGtatGAGTCTCACCCCTGAGCGACTTCTTCAAGAGAGAAGTCGCTCAGGGTGAGGACGTTTTGct  
cgagctggcgaattcc  
>CD\_NM\_001768.4:723  
CgCctGcgagtctGGtatGCCACCCTTACTGCAACCACAGTTCAAGAGACTGTGGTTGCAGTAAAGGGTGATTTTTGct  
cgagctggcgaattcc  
>CD\_NM\_001768.4:650  
CgCctGcgagtctGGtatGAACTTCGCTGTGATATCTACATTCAAGAGATGTAGATATCACAGGCGAAGCTTTTTGct  
cgagctggcgaattcc  
>CD\_NM\_001768.4:316  
CgCctGcgagtctGGtatGCCCCACCTTCTCTTATACCTCTTCAAGAGAGAGGTATAGGAGGAAGGTGGGATTTTTGct  
cgagctggcgaattcc  
>CD\_NM\_001768.4:717  
CgCctGcgagtctGGtatGCGGTTATCACCCCTTACTGCAATTCAAGAGATTGCAGTAAAGGGTGATAACCATTTTTGct  
cgagctggcgaattcc  
>CD\_NM\_001768.4:127  
CgCctGcgagtctGGtatGCCAGTGACCGCCTTGCTCTGTTCAGAGACAGGAGCAAGGCGGTCAGTGGTTTTGct  
cgagctggcgaattcc  
>CD\_NM\_001768.4:474  
CgCctGcgagtctGGtatGACAACCTCCATCATGTACTTCAAGAGACTGAAGTACATGATGGAGTTGCTTTTTGct  
cgagctggcgaattcc  
>CD\_NM\_001768.4:778  
CgCctGcgagtctGGtatGCGTGGTCAAATCGGGAGACAAGTTCAAGAGACTTGTCTCCCGATTTGACCACATTTTTGct  
cgagctggcgaattcc  
>CD\_NM\_004931:292  
CgCctGcgagtctGGtatGCCGGTGAAGAGGTGGAACAGGATTCAAGAGATCCTGTTCCACCTTTCACCGTTTTTGct  
cgagctggcgaattcc  
>CD\_NM\_004931:381  
CgCctGcgagtctGGtatGCGTGGCATCTACTTCTGCATGATTCAAGAGATCATGCAGAAGTAGATGCCACTTTTTGct  
cgagctggcgaattcc  
>CD\_NM\_004931:340  
CgCctGcgagtctGGtatGACCGGTTCAATCTCAATCTCACTTCAAGAGAGTGAGATTGAGAATGAACCGGCTTTTTGct  
cgagctggcgaattcc  
>CD\_NM\_004931:334  
CgCctGcgagtctGGtatGCTGCAAGCCGGTTCAATCTCAATTCAAGAGATTGAGAATGAACCGGCTTGCATTTTTGct  
cgagctggcgaattcc  
>CD\_NM\_004931:89  
CgCctGcgagtctGGtatGAACAGTCTCCATGGCAACTCATTCAAGAGATGAGTTGCCATGGAGAACTGTCTTTTTGct  
cgagctggcgaattcc  
>CD\_NM\_004931:258

CgCctGcgagtctGGtatGATGGCCCTCTGGGATTCCGCAATTCAAGAGATTGCGGAATCCCAGAGGGCCAGTTTTTGct  
cgagctggcgaattcc  
>CD\_NM\_004931:84  
CgCctGcgagtctGGtatGAAGCTGACAGTCTCCATGGCATTCAAGAGATGCCATGGAGAACTGTCAGCTGTTTTTGct  
cgagctggcgaattcc  
>CD\_NM\_004931:80  
CgCctGcgagtctGGtatGAGCGCAGCTGACAGTCTCCATTTCAAGAGAATGGAGAACTGTCAGCTGCGCGTTTTTGct  
cgagctggcgaattcc  
>CD\_NM\_004931:76  
CgCctGcgagtctGGtatGCGGCCGCGCAGCTGACAGTCTTTTCAAGAGAAGAACTGTCAGCTGCGCGGCCATTTTTGct  
cgagctggcgaattcc  
>CD\_NM\_004931:450  
CgCctGcgagtctGGtatGATGGTTGATTTCCCTCCCACCATTCAAGAGATGGTGGGAAGGAAATCAACCACTTTTGct  
cgagctggcgaattcc  
>CD\_NM\_004931:124  
CgCctGcgagtctGGtatGACCCTGCATACATAAAGGTGCATTCAAGAGATGCACCTTTATGTATGCAGGGGTTTTGct  
cgagctggcgaattcc  
>CD\_NM\_004931:79  
CgCctGcgagtctGGtatGACGCGCAGCTGACAGTCTCCATTCAAGAGATGGAGAACTGTCAGCTGCGCGTTTTTGct  
cgagctggcgaattcc  
>CD\_NM\_172099.1:649  
CgCctGcgagtctGGtatGACGGCTTCGTTTCATGAAACAGTTCAAGAGACTGTTTCATGAAACGAAGCCGGTTTTGct  
cgagctggcgaattcc  
>CD\_NM\_172099.1:443  
CgCctGcgagtctGGtatGATGAGTGTGGTTGATTTCCCTTCTTCAAGAGAGAAGGAAATCAACCACACTCAGTTTTTGct  
cgagctggcgaattcc  
>CD\_NM\_172099.1:417  
CgCctGcgagtctGGtatGCGCTGACCTTCGGAAGGGAACCTCAAGAGAGTTCCTTCCCGAAGGTCAGCTTTTTTGct  
cgagctggcgaattcc  
>CD\_NM\_172099.1:702  
CgCctGcgagtctGGtatGATTTCACAACTTGCTGTTGTTTTTCAAGAGAAAACAACAGCAAGTTGTGAACTTTTTGct  
cgagctggcgaattcc  
>CD\_NM\_172099.1:652  
CgCctGcgagtctGGtatGACTTCGTTTCATGAAACAGAAATTCAGAGATTTCTGTTTCATGAAACGAAGCTTTTTGct  
cgagctggcgaattcc  
>CD\_NM\_172099.1:346  
CgCctGcgagtctGGtatGAATTCTCAATCTCACAAGCGTGTTCAGAGACACGCTTGTGAGATTGAGAATTTTTGct  
cgagctggcgaattcc  
>CD\_NM\_172099.1:381  
CgCctGcgagtctGGtatGATGGCATCTACTTCTGCATGATTTCAAGAGAATCATGCAGAAGTAGATGCCACTTTTTGct  
cgagctggcgaattcc  
>CD\_NM\_172099.1:439  
CgCctGcgagtctGGtatGCCAGCTGAGTGTGGTTGATTTCTTCAAGAGAGAAATCAACCACACTCAGCTGATTTTTGct  
cgagctggcgaattcc  
>CD\_NM\_172099.1:334  
CgCctGcgagtctGGtatGCGCAAGCCGGTTCATTCTCAATTTCAAGAGAATTGAGAATGAACCGGCTTGCATTTTGct  
cgagctggcgaattcc  
>CD\_NM\_172099.1:100  
CgCctGcgagtctGGtatGCGGCAACTCAGTCCCTCCAGCAGTTCAGAGACTGCTGGAGGACTGAGTTGCCATTTTTGct  
cgagctggcgaattcc  
>CD\_NM\_172099.1:257  
CgCctGcgagtctGGtatGATGGCCCTCTGGGATTCCGCAATTCAAGAGATTGCGGAATCCCAGAGGGCCAGTTTTGct  
cgagctggcgaattcc  
>CD\_NM\_172099.1:658

CgCctGcgagtctGGtatGCTTCATGAAACAGAAATTC AATTTCAAGAGAATTGAATTTCTGTTTCATGAAATTTTTGct  
cgagctggcgaattcc  
>CD\_NM\_172099.1:292  
CgCctGcgagtctGGtatGAGGTGAAGAGGTGGAACAGGAGTTCAAGAGACTCCTGTTCCACCTCTCACCGTTTTTGct  
cgagctggcgaattcc  
>CD\_NM\_172099.1:647  
CgCctGcgagtctGGtatGACCCGGCTTCGTTTCATGAAACTTCAAGAGAGTTTCATGAAACGAAGCCGGGCTTTTTTGct  
cgagctggcgaattcc  
>CD\_NM\_172099.1:348  
CgCctGcgagtctGGtatGCTCTCAATCTCACAAGCGTGAATTCAAGAGATTCACGCTTGTGAGATTGAGAATTTTTGct  
cgagctggcgaattcc  
>CD\_NM\_172099.1:184  
CgCctGcgagtctGGtatGATCCCTCAGTAACATGCGCATCTTCAAGAGAGATGCGCATGTTACTGAGGGAGTTTTTGct  
cgagctggcgaattcc  
>CD\_NM\_172099.1:76  
CgCctGcgagtctGGtatGAGCCGCGCAGCTGACAGTTCTTCAAGAGAGAGAACTGTCAGCTGCGCGGCCTTTTTGct  
cgagctggcgaattcc  
>CD\_NM\_172099.1:235  
CgCctGcgagtctGGtatGAAGTGACAGTCACCACGAGTTCTTCAAGAGAGAACTCGTGGTACTGTCACTGTTTTTGct  
cgagctggcgaattcc  
>CD\_NM\_172099.1:339  
CgCctGcgagtctGGtatGACCCGGTTCATTCTCAATCTCACTTCAAGAGAGTGAGATTGAGAATGAACCGGCTTTTTTGct  
cgagctggcgaattcc  
>CD\_NM\_172099.1:645  
CgCctGcgagtctGGtatGAAGCCCGGCTTCGTTTCATGAATTTCAAGAGATTCATGAAACGAAGCCGGGCTTTTTTGct  
cgagctggcgaattcc  
>CD\_NM\_172099.1:145  
CgCctGcgagtctGGtatGCACCAACAAGATGGTGATGCTGTTCAAGAGACAGCATCACCATCTTGTGGTTTTTTTTGct  
cgagctggcgaattcc  
>CD\_NM\_000902:360  
CgCctGcgagtctGGtatGCGCGGAGGCTGGTTGAAACGTATTCAAGAGATACGTTTCAACCAGCCTCCGCATTTTTGct  
cgagctggcgaattcc  
>CD\_NM\_000902:508  
CgCctGcgagtctGGtatGCAGCATTGTACAGGTCTTGTATTTCAAGAGAATACAAGACCTGTACAATGCTTTTTTTTTGct  
cgagctggcgaattcc  
>CD\_NM\_000902:900  
CgCctGcgagtctGGtatGAAGCTTGCTTTGGAAATGAATATTCAAGAGATATTCATTTCCAAAGCAAGCTGTTTTTGct  
cgagctggcgaattcc  
>CD\_NM\_000902:1330  
CgCctGcgagtctGGtatGATGCAAACATATGTCAATGGGAATTTCAAGAGATTCACATTGACATAGTTTGCACTTTTTGct  
cgagctggcgaattcc  
>CD\_NM\_000902:2002  
CgCctGcgagtctGGtatGATGGACAGCACCTTAATGGAATTTCAAGAGAATTCATTAAAGGTGCTGTCCACTTTTTTGct  
cgagctggcgaattcc  
>CD\_NM\_000902:361  
CgCctGcgagtctGGtatGACGGAGGCTGGTTGAAACGTAATTCAAGAGATTACGTTTCAACCAGCCTCCGCTTTTTTGct  
cgagctggcgaattcc  
>CD\_NM\_000902.2:1548  
CgCctGcgagtctGGtatGCTGACATTGTTTCAATGATAATTCAAGAGATTATCATTTGAAACAATGTCATTTTTTGct  
cgagctggcgaattcc  
>CD\_NM\_000902.2:1330  
CgCctGcgagtctGGtatGCGCAAACATATGTCAATGGGAATTTCAAGAGAATTCACATTGACATAGTTTGCATTTTTTGct  
cgagctggcgaattcc  
>CD\_NM\_000902.2:565

CgCctGcgagtctGGtatGCCTACTCAAAC TGTACCAGACTTCAAGAGAGTCTGGTAACAGTTTGAGTAGATTTTTGct  
cgagctggcgaattcc  
>CD\_NM\_000902.2:854  
CgCctGcgagtctGGtatGACCAGATTGATTCGTCAGGAAGTTCAAGAGACTTCCTGACGAATCAATCTGGCTTTTTGct  
cgagctggcgaattcc  
>CD\_NM\_000902.2:1319  
CgCctGcgagtctGGtatGCGGAGACGTTGTGCAAAC TATGTTCAAGAGACATAGTTTGCACAACGTCTCCATTTTTGct  
cgagctggcgaattcc  
>CD\_NM\_000902.2:1139  
CgCctGcgagtctGGtatGACTCCAGAAATATTTAAACCAAAC TTTCAAGAGAGTTTGGTTAAATATTCTGGAGCTTTTTGct  
cgagctggcgaattcc  
>CD\_NM\_000902.2:1080  
CgCctGcgagtctGGtatGCTGAAATCATGTCAACTGTGAATTCAAGAGATTCACAGTTGACATGATTTCAATTTTTGct  
cgagctggcgaattcc  
>CD\_NM\_000902.2:1543  
CgCctGcgagtctGGtatGCCCTGATGACATTGTTTCAAATTTCAAGAGAATTTGAAACAATGTCATCAGGATTTTTGct  
cgagctggcgaattcc  
>CD\_NM\_000902.2:1414  
CgCctGcgagtctGGtatGAGTCGAGGATTTGATTGCACAGTTCAAGAGACTGTGCAATCAAATCCTCGACCTTTTTGct  
cgagctggcgaattcc  
>CD\_NM\_000902.2:2072  
CgCctGcgagtctGGtatGCACAGAGCCTATCAGAATTATATTCAAGAGATATAATTTCTGATAGGCTCTGTATTTTTGct  
cgagctggcgaattcc  
>CD\_NM\_000902.2:361  
CgCctGcgagtctGGtatGAGGAGGCTGGTTGAAACGTAATTTCAAGAGAATTACGTTTCAACCAGCCTCCGTTTTTgct  
cgagctggcgaattcc  
>CD\_NM\_000902.2:1800  
CgCctGcgagtctGGtatGCGCAGTCCAAC TCAATTGAAC TATTCAAGAGATAGTTCAATGAGTTGGACTGCTTTTTTgct  
cgagctggcgaattcc  
>CD\_NM\_000902.2:982  
CgCctGcgagtctGGtatGCCCAATGCTTCTGTATAACAAGTTCAAGAGACTTGT TATACAGAAGCATTGGATTTTTGct  
cgagctggcgaattcc  
>CD\_NM\_000902.2:730  
CgCctGcgagtctGGtatGCTCTGTGAATCATGTAATTCATTTCAAGAGAATGAATTACATGATTCACAGAATTTTTGct  
cgagctggcgaattcc  
>CD\_NM\_000902.2:104  
CgCctGcgagtctGGtatGCAGTCAGAAAGTCAGATGGATATTCAAGAGATATCCATCTGACTTTCTGACTTTTTTgct  
cgagctggcgaattcc  
>CD\_NM\_000902.2:2007  
CgCctGcgagtctGGtatGCGCACCTTAATGGAATTAATACTTCAAGAGAGTATTAATTCATTAAGGTGCTTTTTTgct  
cgagctggcgaattcc  
>CD\_NM\_000902.2:554  
CgCctGcgagtctGGtatGAGTGGAGAACCTCTACTCAAAC TTTCAAGAGAGTTTGGTAGAGGTTCTCCACCTTTTTGct  
cgagctggcgaattcc  
>CD\_NM\_000902.2:2236  
CgCctGcgagtctGGtatGCCCAGGCAATTT CAGGATTATTTTCAAGAGAAATAATCCTGAAATTGCCTGGATTTTTGct  
cgagctggcgaattcc  
>CD\_NM\_000902.2:1640  
CgCctGcgagtctGGtatGCTGAAATTCAGCCAAAGTAAAC TTTCAAGAGAGTTTACTTTGGCTGAATTTCAATTTTTGct  
cgagctggcgaattcc  
>CD\_NM\_000902.2:1951  
CgCctGcgagtctGGtatGCTCCCAGTGCATGGTGTATCAGTTCAAGAGACTGATACACCATGCACTGGGATTTTTTgct  
cgagctggcgaattcc  
>CD\_NM\_000902.2:1063

CgCtGcgagtctGGtatGATGGTTGAATTCACAAATGAATTCAAGAGATTCATTTGTGAAATTCACCAGTTTTTgct  
cgagctggcgaattcc  
>CD\_NM\_000902.2:2002  
CgCtGcgagtctGGtatGCGGACAGCACCTTAATGGAATTTTCAAGAGAAATTCATTAAGGTGCTGTCCATTTTTGct  
cgagctggcgaattcc  
>CD\_NM\_000902.2:1535  
CgCtGcgagtctGGtatGCTCGGCTATCCTGATGACATTGTTCAAGAGACAATGTCATCAGGATAGCCGATTTTTGct  
cgagctggcgaattcc  
>CD\_NM\_000902.2:2074  
CgCtGcgagtctGGtatGAAGAGCCTATCAGAATTATATTTTCAAGAGAAATATAATTCTGATAGGCTCTGTTTTGct  
cgagctggcgaattcc  
>CD\_NM\_000902.2:1053  
CgCtGcgagtctGGtatGCGCCATTCAGCTGGTTGAATTTTCAAGAGAAAATTCACCAGCTGAATGGCTTTTTGct  
cgagctggcgaattcc  
>CD\_NM\_000902.2:1960  
CgCtGcgagtctGGtatGAATGGTGTATCAGTATGGAACTTCAAGAGAGTTCCATACTGATACACCATGTTTTGct  
cgagctggcgaattcc  
>CD\_NM\_000902.2:728  
CgCtGcgagtctGGtatGCATTCTGTGAATCATGTAATTTTCAAGAGAGAATTACATGATTCACAGAATTTTTGct  
cgagctggcgaattcc  
>CD\_NM\_002209:761  
CgCtGcgagtctGGtatGCAGCACATGTTGCTGTTGACCATTCAAGAGATGGTCAACAGCAACATGTGCTTTTTGct  
cgagctggcgaattcc  
>CD\_NM\_002209:980  
CgCtGcgagtctGGtatGCCCCTCCACAAATTTGCATCAATTCAGAGATGATGCAAATTTGTGGAGGGTTTTGct  
cgagctggcgaattcc  
>CD\_NM\_002209:1444  
CgCtGcgagtctGGtatGCGGGACCCAGATTGGCTCTTATTTCAAGAGAATAAGAGCCAATCTGGGTCCATTTTTGct  
cgagctggcgaattcc  
>CD\_NM\_002209:1505  
CgCtGcgagtctGGtatGAGGGAGACAGAGCTGCTGCTGATTCAAGAGATCAGCAGCAGCTCTGTCTCCCTTTTTGct  
cgagctggcgaattcc  
>CD\_NM\_002209:1635  
CgCtGcgagtctGGtatGCCCCACTCGGGCGGTTTGGAGATTCAGAGATCTCCAACCGCCCGAGTGGTTTTGct  
cgagctggcgaattcc  
>CD\_NM\_002209:2771  
CgCtGcgagtctGGtatGAACGCCAATGTGACCTGTAACATTCAGAGATGTTACAGGTCACATTGGCGTTTTTGct  
cgagctggcgaattcc  
>CD\_NM\_002209:119  
CgCtGcgagtctGGtatGCTGGCGCTGCTGTCTGGGTTCTTTCAAGAGAAGAACCAGACAGCAGCGCCATTTTTGct  
cgagctggcgaattcc  
>CD\_NM\_002209:2405  
CgCtGcgagtctGGtatGAAGGACAAGAAGTGTGAGGCAATTCAGAGATGCCTCACACTTCTTGCTCTTTTTGct  
cgagctggcgaattcc  
>CD\_NM\_002209.1:711  
CgCtGcgagtctGGtatGATCAGATTATGTTAAATGGAAGTTCAAGAGACTTCATTTAACATAATCTGAGTTTTGct  
cgagctggcgaattcc  
>CD\_NM\_002209.1:3248  
CgCtGcgagtctGGtatGACCTCTCCATCTCCTTCAACAGTTCAAGAGACTGTTGAAGGAGATGGAGAGGGTTTTGct  
cgagctggcgaattcc  
>CD\_NM\_002209.1:2709  
CgCtGcgagtctGGtatGCGCTCTGCAGATGATGTTAATTTCAAGAGAATTAACATCATCTGCAGAGCATTTTTGct  
cgagctggcgaattcc  
>CD\_NM\_002209.1:2160

CgCtGcgagtctGGtatGAAGACATGAACTCAGAAGGAATTTCAAGAGAATTCCTTCTGAGTTCATGTCTCTTTTTGct  
cgagctggcgaattcc  
>CD\_NM\_002209.1:338  
CgCtGcgagtctGGtatGACCTGAGAGGTTCCAACATACTTCAAGAGAGTATAGTTGGAACCTCTCAGGGTTTTGct  
cgagctggcgaattcc  
>CD\_NM\_002209.1:735  
CgCtGcgagtctGGtatGACCTGATGCTCTGCTGAAGCATTTCAGAGAATGCTTCAGCAGAGCATCAGGGTTTTGct  
cgagctggcgaattcc  
>CD\_NM\_002209.1:2434  
CgCtGcgagtctGGtatGATGTCTTCTCTCTGCAAGATTTCAAGAGAATCTTGCAGGAGAGAAGGACACTTTTTGct  
cgagctggcgaattcc  
>CD\_NM\_002209.1:917  
CgCtGcgagtctGGtatGCAGACATCATCCGCTACATCATTTCAGAGAATGATGTAGCGGATGATGTCTTTTTGct  
cgagctggcgaattcc  
>CD\_NM\_002209.1:621  
CgCtGcgagtctGGtatGAATGAAGGATGTGATGAAGAAATTCAGAGATTTCTTCATCACATCCTTCATGTTTTGct  
cgagctggcgaattcc  
>CD\_NM\_002209.1:3192  
CgCtGcgagtctGGtatGAACTCTGGAGCTGGTGGGAGAGTTCAAGAGACTCTCCCACCAGCTCCAGAGTCTTTTTGct  
cgagctggcgaattcc  
>CD\_NM\_002209.1:2033  
CgCtGcgagtctGGtatGCTATCACAATCTGTTTCCAGATTTCAAGAGAATCTGGAAACAGATTGTGATATTTTTGct  
cgagctggcgaattcc  
>CD\_NM\_002209.1:2037  
CgCtGcgagtctGGtatGAACAATCTGTTTCCAGATCAAGTTCAAGAGACTTGATCTGGAAACAGATTGTGTTTTGct  
cgagctggcgaattcc  
>CD\_NM\_002209.1:1246  
CgCtGcgagtctGGtatGAACACATTTATTGGGAATGAACTTCAAGAGAGTTCATTCCCAATAAATGTGTCTTTTTGct  
cgagctggcgaattcc  
>CD\_NM\_002209.1:1557  
CgCtGcgagtctGGtatGCGGAGGCCGGGTGTTTATCTACTTCAAGAGAGTAGATAAACACCCGGCTCCTTTTTGct  
cgagctggcgaattcc  
>CD\_NM\_002209.1:783  
CgCtGcgagtctGGtatGCACCTTTGGTGCCATCAATTATTTCAAGAGAATAATTGATGGCACCAAAGGTATTTTTGct  
cgagctggcgaattcc  
>CD\_NM\_002209.1:1565  
CgCtGcgagtctGGtatGAGGTGTTTATCTACCAGAGAAGTTCAAGAGACTTCTCTGGTAGATAAACACCCTTTTTGct  
cgagctggcgaattcc  
>CD\_NM\_002209.1:2703  
CgCtGcgagtctGGtatGATCGGTTGCTCTGCAGATGATGTTCAAGAGACATCATCTGCAGAGCAACCGAGTTTTGct  
cgagctggcgaattcc  
>CD\_NM\_002209.1:2100  
CgCtGcgagtctGGtatGAACTTACACTCTGCAGCTGGATTTCAAGAGAATCCAGCTGCAGAGGTAAAGTTTTTGct  
cgagctggcgaattcc  
>CD\_NM\_002209.1:1035  
CgCtGcgagtctGGtatGCTTTGAGAAGCTGAAAGATCTATTCAAGAGATAGATCTTTCAGCTTCTCAAATTTTTGct  
cgagctggcgaattcc  
>CD\_NM\_002209.1:1106  
CgCtGcgagtctGGtatGCGGACCTGACTTCTTCAACATTTCAAGAGAATGTTGAAGGAAGTCAGGTCCTTTTTGct  
cgagctggcgaattcc  
>CD\_NM\_002209.1:849  
CgCtGcgagtctGGtatGCGCCACCAAAGTGCTTATCATCTTCAAGAGAGATGATAAGCACTTTGGTGGCATTTTTTGct  
cgagctggcgaattcc  
>CD\_NM\_002209.1:99

CgCctGcgagtctGGtatGATGCATCACTGTGATGGCCATGTTCAAGAGACATGGCCATCACAGTGATGCAGTTTTTgct  
cgagctggcgaattcc  
>CD\_NM\_002209.1:929  
CgCctGcgagtctGGtatGACTACATCATCGGGATTGGAAATTC AAGAGATTTCCAATCCCGATGATGTAGCTTTTTGct  
cgagctggcgaattcc  
>CD\_NM\_002209.1:1215  
CgCctGcgagtctGGtatGATTTCTTGACCTGAAGGCAGACTTCAAGAGAGTCTGCCTTCAGGTCAAGAAAGTTTTGct  
cgagctggcgaattcc  
>CD\_NM\_002209.1:2200  
CgCctGcgagtctGGtatGCTGTGCATGCACTGACTTCTCATTTC AAGAGAATGAGAAGTCAGTGCATGACATTTTTGct  
cgagctggcgaattcc  
>CD\_NM\_000632:77  
CgCctGcgagtctGGtatGCGGCTCTCAGAGTCCTTCTGTTTTCAAGAGAAACAGAAGGACTCTGAGAGCCATTTTTGct  
cgagctggcgaattcc  
>CD\_NM\_000632:662  
CgCctGcgagtctGGtatGCCCCGATTCACTTTACCTTCAATTCAAGAGATTGAAGGTAAAGTGAATCCGGATTTTTGct  
cgagctggcgaattcc  
>CD\_NM\_000632:1196  
CgCctGcgagtctGGtatGAGGCTGGTGGAGTCTTCTATATTCAAGAGATATAGAAAGACTCCACCAGCCTTTTGct  
cgagctggcgaattcc  
>CD\_NM\_000632:2476  
CgCctGcgagtctGGtatGCACGTGACAGTGACTGTGAGAATTCAAGAGATTCTCACAGTCACTGTCACGTTTTTgct  
cgagctggcgaattcc  
>CD\_NM\_000632:2918  
CgCctGcgagtctGGtatGATCGGGTCATGCAGCATCAATATTCAAGAGATATTGATGCTGCATGACCCGACTTTTTGct  
cgagctggcgaattcc  
>CD\_NM\_000632:2999  
CgCctGcgagtctGGtatGCCCCGCTGAACCAGACTGTCATTTCAAGAGAATGACAGTCTGGTTCAGCCGGATTTTTGct  
cgagctggcgaattcc  
>CD\_NM\_000632:1195  
CgCctGcgagtctGGtatGCGGGCTGGTGGAGTCTTCTATTTCAAGAGAATAGAAAGACTCCACCAGCCATTTTTGct  
cgagctggcgaattcc  
>CD\_NM\_000632:583  
CgCctGcgagtctGGtatGCAGGAGTTTGTCTCAACTGTGATTCAAGAGATCACAGTTGAGACAAACTCCTTTTTTgct  
cgagctggcgaattcc  
>CD\_NM\_000632:3031  
CgCctGcgagtctGGtatGACCCAGGTCACCTTCTCCGAGATTCAAGAGATCTCGGAGAAGGTGACCTGGGGTTTTTgct  
cgagctggcgaattcc  
>CD\_NM\_000632.2:2480  
CgCctGcgagtctGGtatGAACAGTGACTGTGAGAAATGATTTCAAGAGAATCATTTCTCACAGTCACTGTCTTTTGct  
cgagctggcgaattcc  
>CD\_NM\_000632.2:583  
CgCctGcgagtctGGtatGCGGAGTTTGTCTCAACTGTGATTTCAAGAGAATCACAGTTGAGACAAACTCCTTTTTTgct  
cgagctggcgaattcc  
>CD\_NM\_000632.2:902  
CgCctGcgagtctGGtatGAAGAGAGGGAGTCATTCGCTACTTCAAGAGAGTAGCGAATGACTCCCTCTCTGTTTTGct  
cgagctggcgaattcc  
>CD\_NM\_000632.2:2204  
CgCctGcgagtctGGtatGCTGTGAGACCCTGAAACTACAGTTCAAGAGACTGTAGTTTCAGGGTCTCACAATTTTTGct  
cgagctggcgaattcc  
>CD\_NM\_000632.2:2747  
CgCctGcgagtctGGtatGCGGAAACAAACTGCTCCTCAAGTTCAAGAGACTTGAGGAGCAGTTTGTTCATTTTTGct  
cgagctggcgaattcc  
>CD\_NM\_000632.2:3278



CgCctGcgagtctGGtatGAACAGCTGAGATCTTGTTTAACTTCAAGAGAGTTAAACAAGATCTCAGCTGTGTTTTTGct  
cgagctggcgaattcc  
>CD\_NM\_000632.2:2081  
CgCctGcgagtctGGtatGAATCCAGAGTGTGTGACTTATTTCAAGAGAATAAGTCACAACACTCTGGATCTTTTTTGct  
cgagctggcgaattcc  
>CD\_NM\_000632.2:1196  
CgCctGcgagtctGGtatGAGCTGGTGGAGTCTTTCTATATTTCAAGAGAATATAGAAAGACTCCACCAGCCTTTTTTGct  
cgagctggcgaattcc  
>CD\_NM\_000632.2:77  
CgCctGcgagtctGGtatGAGCTCTCAGAGTCCTTCTGTTATTCAAGAGATAACAGAAGGACTCTGAGAGCCTTTTTTGct  
cgagctggcgaattcc  
>CD\_NM\_000632.2:2054  
CgCctGcgagtctGGtatGAACACGGGATCGGCTAAGAGAATTCAAGAGATTCTCTTAGCCGATCCCGTGTGTTTTTGct  
cgagctggcgaattcc  
>CD\_NM\_000632.2:3226  
CgCctGcgagtctGGtatGCCTCGTTGACTGGTACATCAATTCAAGAGATTGATGTACCAGTCAAACGAGATTTTTTGct  
cgagctggcgaattcc  
>CD\_NM\_000632.2:1031  
CgCctGcgagtctGGtatGAGCTCTGAAGACCATTCAAGACTTCAAGAGAGTTCTGAATGGTCTTCAGAGCCTTTTTTGct  
cgagctggcgaattcc  
>CD\_NM\_000632.2:1578  
CgCctGcgagtctGGtatGAGGTGGCAGTGTGATGCTGTTCTTCAAGAGAGAACAGCATCACACTGCCACCGTTTTTGct  
cgagctggcgaattcc  
>CD\_NM\_000632.2:1460  
CgCctGcgagtctGGtatGATCCGTGGACGTGGACAGCAACTTCAAGAGAGTTGCTGTCCACGTCCACGGAGTTTTTGct  
cgagctggcgaattcc  
>CD\_NM\_000632.2:667  
CgCctGcgagtctGGtatGCTCACTTTACCTTCAAAGAGTTTTTCAAGAGAAACTCTTTGAAGGTAAAGTGAATTTTTTGct  
cgagctggcgaattcc  
>CD\_NM\_000632.2:2705  
CgCctGcgagtctGGtatGAACCTTTAATATCACGTTTGATTTCAAGAGAATCAAACGTGATATTAAGGTGTTTTTGct  
cgagctggcgaattcc  
>CD\_NM\_000632.2:3281  
CgCctGcgagtctGGtatGCGCTGAGATCTTGTTTAACTTCAAGAGAGTTTCAAGAGAATCGTTAAACAAGATCTCAGCTTTTTTGct  
cgagctggcgaattcc  
>CD\_NM\_000632.2:764  
CgCctGcgagtctGGtatGAATCCGCAAAGTGGTACGAGAGTTCAAGAGACTCTCGTACCACTTTGCGGATGTTTTTGct  
cgagctggcgaattcc  
>CD\_NM\_000632.2:2478  
CgCctGcgagtctGGtatGATGACAGTACTGTGAGAAATGTTCAAGAGACATTTCTCACAGTCACTGTCACTTTTTGct  
cgagctggcgaattcc  
>CD\_NM\_000632.2:143  
CgCctGcgagtctGGtatGAGCAATGACCTTCCAAGAGAACTTCAAGAGAGTTCTCTTGAAGGTCATTGCGTTTTTGct  
cgagctggcgaattcc  
>CD\_NM\_000632.2:3005  
CgCctGcgagtctGGtatGAAACCAGACTGTCATATGGGACTTCAAGAGAGTCCCATATGACAGTCTGGTCTTTTTTGct  
cgagctggcgaattcc  
>CD\_NM\_000632.2:2736  
CgCctGcgagtctGGtatGCAGGCTTCCCTTGGAAACAACTTCAAGAGAGTTTGTTCCTCAAGGGAAGCCTTTTTTGct  
cgagctggcgaattcc  
>CD\_NM\_000632.2:1971  
CgCctGcgagtctGGtatGCGGAATGTATTTGAGTGTAATGTTCAAGAGACATTACACTCAAATACATTCCTTTTTTGct  
cgagctggcgaattcc  
>CD\_NM\_000632.2:3152

CgCtGcgagtctGGtatGATGCCAGAGAATCCAGTGTGACTTCAAGAGAGTCACACTGGATTCTCTGGCAGTTTTTGct  
cgagctggcgaattcc  
>CD\_XM\_113880:3323  
CgCtGcgagtctGGtatGAAGGCATTTATGAGAGCTCAGATTCAAGAGATCTGAGCTCTCATAAATGCCTTTTTTGct  
cgagctggcgaattcc  
>CD\_NM\_000887:177  
CgCtGcgagtctGGtatGCTGGAGACAGCGTGGTCCAGTATTCAAGAGATACTGGACCACGCTGTCTCCAATTTTTGct  
cgagctggcgaattcc  
>CD\_NM\_000887:725  
CgCtGcgagtctGGtatGAACCAGCTGCAAGGGTTTACATTTCAAGAGAATGTAAACCCTTGCAGCTGGTGTTTTTGct  
cgagctggcgaattcc  
>CD\_NM\_000887:903  
CgCtGcgagtctGGtatGAAGGCATCATCCGCTATGCAATTTCAAGAGAATTGCATAGCGGATGATGCCTGTTTTTGct  
cgagctggcgaattcc  
>CD\_NM\_000887:988  
CgCtGcgagtctGGtatGACCCTCCAGGAACACATATTTTTCAAGAGAAAATATGTGTTCTGGGAGGGCTTTTTGct  
cgagctggcgaattcc  
>CD\_NM\_000887:2854  
CgCtGcgagtctGGtatGAAGCCACGAACAATTCACCAATTTCAAGAGATTTGGTGAATTGTTCTGGCTGTTTTTGct  
cgagctggcgaattcc  
>CD\_NM\_000887:3535  
CgCtGcgagtctGGtatGACCAGCCCAGTGGAGAAATTTCAAGAGATTTCTCACTGGGCGGGCTGGGGTTTTTGct  
cgagctggcgaattcc  
>CD\_NM\_000887:632  
CgCtGcgagtctGGtatGCCCTGATGCAGTCTCCAACATTTCAAGAGATGTTGGAGAACTGCATCAGGGATTTTTGct  
cgagctggcgaattcc  
>CD\_NM\_000887:3259  
CgCtGcgagtctGGtatGATCGGTCTGTGAGTGTGGCTGAATTTCAAGAGATTCAGCCACACTCACGACCGACTTTTTGct  
cgagctggcgaattcc  
>CD\_NM\_000887:3050  
CgCtGcgagtctGGtatGCCCTTCGGTGCTCCTCAGAGATTTCAAGAGATCTCTGAGGAGCACCGAAGGGATTTTTGct  
cgagctggcgaattcc  
>CD\_NM\_000887:2351  
CgCtGcgagtctGGtatGCCGGCCTCCCTACCTTTGAGATTTCAAGAGATCTCAAAGGGTAGGGAGGCCGTTTTTGct  
cgagctggcgaattcc  
>CD\_NM\_000887:2384  
CgCtGcgagtctGGtatGACCGACCATATCTGCCAGGACATTTCAAGAGATGTCTGGCAGATATGGTCGGCTTTTTGct  
cgagctggcgaattcc  
>CD\_NM\_000887.3:855  
CgCtGcgagtctGGtatGCGGCGACAGCCTGGATTATAAGTTCAAGAGACTTATAATCCAGGCTGTGCCTTTTTTGct  
cgagctggcgaattcc  
>CD\_NM\_000887.3:990  
CgCtGcgagtctGGtatGATCCCAGGAACACATATTTAAATTTCAAGAGATTTAAATATGTGTTCTGGGAGTTTTGct  
cgagctggcgaattcc  
>CD\_NM\_000887.3:2687  
CgCtGcgagtctGGtatGACCAGATCACCTTCTGGCTACTTCAAGAGAGTAGCCAAGAAGGTGATCTGGTTTTTGct  
cgagctggcgaattcc  
>CD\_NM\_000887.3:2754  
CgCtGcgagtctGGtatGAACAGCCAATGTGAGCAGTGTGAGTTCAAGAGACTCACTGCTCACATTGGCTGTTTTTGct  
cgagctggcgaattcc  
>CD\_NM\_000887.3:822  
CgCtGcgagtctGGtatGCATTCTCATTTGTCATCACTGATTTCAAGAGAATCAGTGATGACAATGAGAATTTTTTGct  
cgagctggcgaattcc  
>CD\_NM\_000887.3:1020

CgCctGcgagtctGGtatGATTTGATGCTCTGAAAGATATTTTCAAGAGAAATATCTTTCAGAGCATCAAAGTTTTTGct  
cgagctggcgaattcc  
>CD\_NM\_000887.3:902  
CgCctGcgagtctGGtatGAAGGCATCATCCGCTATGCAATTTCAAGAGAATTGCATAGCGGATGATGCCTGTTTTTGct  
cgagctggcgaattcc  
>CD\_NM\_000887.3:177  
CgCctGcgagtctGGtatGCGGAGACAGCGTGGTCCAGTATTTCAAGAGAATACTGGACCACGCTGTCTCCATTTTTTGct  
cgagctggcgaattcc  
>CD\_NM\_000887.3:3263  
CgCctGcgagtctGGtatGCCGTGAGTGTGGCTGAAATTACTTCAAGAGAGTAATTTTCAGCCACACTCACGATTTTTTGct  
cgagctggcgaattcc  
>CD\_NM\_000887.3:542  
CgCctGcgagtctGGtatGAAGGCAGCATCTCCTCCC GCAATTTCAAGAGATTGCGGGAGGAGATGCTGCCTGTTTTTGct  
cgagctggcgaattcc  
>CD\_NM\_000887.3:2592  
CgCctGcgagtctGGtatGCTCCCTGCACCTGACATGTGACTTCAAGAGAGTCACATGTCAGGTGCAGGGAATTTTTGct  
cgagctggcgaattcc  
>CD\_NM\_000887.3:3234  
CgCctGcgagtctGGtatGACGCCAGATATTGCAGAAGAAGTTCAAGAGACTTCTTCTGCAATATCTGGCGTTTTTGct  
cgagctggcgaattcc  
>CD\_NM\_000887.3:645  
CgCctGcgagtctGGtatGATCCAACAAATTTCCAACACACTTCAAGAGAGTGTGTTTGAATTTGTTGGAGTTTTTGct  
cgagctggcgaattcc  
>CD\_NM\_000887.3:2979  
CgCctGcgagtctGGtatGATGGGTGCTGTGGAGCTGAACTTCAAGAGAGTTCAGCTCCACAGGCACCCAGTTTTTGct  
cgagctggcgaattcc  
>CD\_NM\_000887.3:1573  
CgCctGcgagtctGGtatGCGGTGGTGGTGTGATGCTGTTCTTCAAGAGAGAACAGCATCACACCACCACCTTTTTTGct  
cgagctggcgaattcc  
>CD\_NM\_000887.3:2985  
CgCctGcgagtctGGtatGACCTGTGGAGCTGAACCAGGAGTTCAAGAGACTCCTGGTTCAGCTCCACAGGCTTTTTTGct  
cgagctggcgaattcc  
>CD\_NM\_000887.3:92  
CgCctGcgagtctGGtatGCCCTGTTACAGCCTTAGCAACTTCAAGAGAGTTGCTAAGGCTGTGAACAGGATTTTTTGct  
cgagctggcgaattcc  
>CD\_NM\_000887.3:1983  
CgCctGcgagtctGGtatGCCGGGAGCAGGTGGTCTCTGAGTTCAAGAGACTCAGAGACCACCTGCTCCCGATTTTTTGct  
cgagctggcgaattcc  
>CD\_NM\_000887.3:2742  
CgCctGcgagtctGGtatGACGGCTGCTTCTGACAGCCAATTTCAAGAGAATTGGCTGTCAGAAGCAGCCGGTTTTTGct  
cgagctggcgaattcc  
>CD\_NM\_000887.3:632  
CgCctGcgagtctGGtatGACCTGATGCAGTCTCCAACAATTTCAAGAGATTGTTGGAGAACTGCATCAGGGTTTTTGct  
cgagctggcgaattcc  
>CD\_NM\_000887.3:775  
CgCctGcgagtctGGtatGAACCGATTGTTCCATGCCTCATTTC AAGAGAATGAGGCATGGAACAATCGGTGTTTTTGct  
cgagctggcgaattcc  
>CD\_M22324:934  
CgCctGcgagtctGGtatGCCGCCAAGATGTCCACGTACTTTCAAGAGAAGTACGTGGACATCTTGGGCGTTTTTGct  
cgagctggcgaattcc  
>CD\_M22324:1393  
CgCctGcgagtctGGtatGACGGAGCCCACCTGGAAC TTGATTCAAGAGATCAAGTTCAGGTGGGCTCCGCTTTTTTGct  
cgagctggcgaattcc  
>CD\_M22324:2221

CgCctGcgagtctGGtatGCGCCTGAGCTACTTCAAGCTCATTCAAGAGATGAGCTTGAAGTAGCTCAGGCTTTTTTGct  
cgagctggcgaattcc  
>CD\_M22324:2545  
CgCctGcgagtctGGtatGCGGGACTTCGCCTGGGAGCAGTTTCAAGAGAACTGCTCCCAGGCGAAGTCCATTTTTTGct  
cgagctggcgaattcc  
>CD\_M22324:2551  
CgCctGcgagtctGGtatGCTCGCCTGGGAGCAGTTCCGAATTC AAGAGATTCGGA ACTGCTCCCAGGCGAATTTTTGct  
cgagctggcgaattcc  
>CD\_M22324:799  
CgCctGcgagtctGGtatGACGGCCATGAAGGCCGAGTTCATTCAAGAGATGAACTCGGCCTTCATGGCCGGTTTTTGct  
cgagctggcgaattcc  
>CD\_M22324:691  
CgCctGcgagtctGGtatGACGGGCTTCTACCGCAGCGAGTTTCAAGAGAACTCGCTGCGGTAGAAGCCCGCTTTTTGct  
cgagctggcgaattcc  
>CD\_NM\_001150.1:2165  
CgCctGcgagtctGGtatGAACCCCTTCTCCTGATTGAAGAGTTCAAGAGACTCTTCAATCAGGAAGAGGGTGTTTTTGct  
cgagctggcgaattcc  
>CD\_NM\_001150.1:1262  
CgCctGcgagtctGGtatGAGTGGTCACTGTGATTGCTCATTTC AAGAGAA TGAGCAATCACAGTGACCACTTTTTGct  
cgagctggcgaattcc  
>CD\_NM\_001150.1:1534  
CgCctGcgagtctGGtatGCTGACGCCATCTCCTACAGCAATTC AAGAGAT TGCTGTAGGAGATGGCGTCAATTTTTGct  
cgagctggcgaattcc  
>CD\_NM\_001150.1:2747  
CgCctGcgagtctGGtatGATGGGACTTTGTCCAGAGCAACTTC AAGAGAG TTGCTCTGGACAAAGTCCCAGTTTTTGct  
cgagctggcgaattcc  
>CD\_NM\_001150.1:593  
CgCctGcgagtctGGtatGAACCGAGTACCTGGTGGTGC ACTTCAAGAGAGTGCACCACCAGGTACTCGGTGTTTTTGct  
cgagctggcgaattcc  
>CD\_NM\_001150.1:2141  
CgCctGcgagtctGGtatGACCTGTCACTCTGGCGCTGA ACTTCAAGAGAG TTCAGCGCCAGAGTGACAGGGTTTTTGct  
cgagctggcgaattcc  
>CD\_NM\_001150.1:2717  
CgCctGcgagtctGGtatGCACCAACAACGTCATTGGGCAATTC AAGAGAT TGCCCAATGACGTTGTTGGTATTTTTGct  
cgagctggcgaattcc  
>CD\_NM\_001150.1:2305  
CgCctGcgagtctGGtatGCCTTCATTCACTTCAGAAATAATTC AAGAGATTATTTCTGAAGTGAATGAAGATTTTTGct  
cgagctggcgaattcc  
>CD\_NM\_001150.1:1106  
CgCctGcgagtctGGtatGCGGTCAATTATGACACACCCTACTTC AAGAGAG TAGGGTGTGTCATAATGACCATTTTTGct  
cgagctggcgaattcc  
>CD\_NM\_001150.1:704  
CgCctGcgagtctGGtatGAAGCGAGTACATGGAGGGCAATTC AAGAGAA TTGCCCTCCATGTACTCGCTGTTTTTGct  
cgagctggcgaattcc  
>CD\_NM\_001150.1:1393  
CgCctGcgagtctGGtatGAGGAGCCCACCTGGA ACTTGAATTCAAGAGAT TCAAGTTCCAGGTGGGCTCCGTTTTTGct  
cgagctggcgaattcc  
>CD\_NM\_001150.1:2849  
CgCctGcgagtctGGtatGAACCGAGTATGAGCTGCAGCAGTTC AAGAGACTGCTGCAGCTCATACTCGGTGTTTTTGct  
cgagctggcgaattcc  
>CD\_NM\_001150.1:306  
CgCctGcgagtctGGtatGCCACCTTGGACCAAAGTAAAGTTCA AAGAGACTTTACTTTGGTCCAAGGTGGTTTTTGct  
cgagctggcgaattcc  
>CD\_NM\_001150.1:2797

CgCctGcgagtctGGtatGATGGCTCGTTCTCCTTCTCCAATTCAAGAGATTGGAGAAGGAGAACGAGCCACTTTTTTGct  
cgagctggcgaattcc  
>CD\_NM\_001150.1:2803  
CgCctGcgagtctGGtatGAGTTCTCCTTCTCCAACCTCATTTCAAGAGAATGAGGTTGGAGAAGGAGAACGTTTTTGct  
cgagctggcgaattcc  
>CD\_NM\_001150.1:2221  
CgCctGcgagtctGGtatGACCTGAGCTACTTCAAGCTCATTTCAAGAGAATGAGCTTGAAGTAGCTCAGGCTTTTTTGct  
cgagctggcgaattcc  
>CD\_NM\_001150.1:301  
CgCctGcgagtctGGtatGAGGCCACCACCTTGGACCAAAGTTCAAGAGACTTTGGTCCAAGGTGGTGGCCGTTTTTGct  
cgagctggcgaattcc  
>CD\_NM\_001150.1:2960  
CgCctGcgagtctGGtatGAATCAAGTGGGTGAAGGAGAACTTCAAGAGAGTTCTCCTTACCCACTTGATGTTTTTGct  
cgagctggcgaattcc  
>CD\_NM\_001150.1:766  
CgCctGcgagtctGGtatGCTGCCCGGAAGTCCTTCCCATGTTCAAGAGACATGGGAAGGACTTCCGGGCATTTTTTGct  
cgagctggcgaattcc  
>CD\_NM\_001150.1:440  
CgCctGcgagtctGGtatGAACCGTCCGTTTACCTGCAAGTTCAAGAGACTTGCAGGTGAAACGGACGGTGTTTTTTGct  
cgagctggcgaattcc  
>CD\_NM\_001150.1:1630  
CgCctGcgagtctGGtatGCCACACCTTTGCCTACCAGAATTCAAGAGATTCTGGTAGGCAAAGGTGTGGATTTTTTGct  
cgagctggcgaattcc  
>CD\_NM\_001150.1:1556  
CgCctGcgagtctGGtatGAGGCGCCTCAGTCCTCAGGATGTTCAAGAGACATCCTGAGGACTGAGGCGCCTTTTTGct  
cgagctggcgaattcc  
>CD\_NM\_001150.1:1967  
CgCctGcgagtctGGtatGAAATGAGTGGGTCCTGCTGAACTTCAAGAGAGTTCAGCAGGACCCACTCATTTTTTTGct  
cgagctggcgaattcc  
>CD\_NM\_001150.1:2306  
CgCctGcgagtctGGtatGATTCATTCACTTCAGAAATAATTTCAAGAGAATTATTTCTGAAGTGAATGAAGTTTTTGct  
cgagctggcgaattcc  
>CD\_NM\_001150.1:1058  
CgCctGcgagtctGGtatGAGGCGATTATGCCCTGAACGTGTTCAAGAGACACGTTTCAGGGCATAATCGCCGTTTTTGct  
cgagctggcgaattcc  
>CD\_NM\_001150.1:977  
CgCctGcgagtctGGtatGATTCGACTACGTGGAGAAGCAGTTCAAGAGACTGCTTCTCCACGTAGTCGAACTTTTTTGct  
cgagctggcgaattcc  
>CD\_NM\_000591:120  
CgCctGcgagtctGGtatGCTGGAGCGCGCTCCTGCTTGTTCCTTCAAGAGAACAAAGCAGGACGCGCGCTCCATTTTTTGct  
cgagctggcgaattcc  
>CD\_NM\_000591:187  
CgCctGcgagtctGGtatGCACCTTGTGAGCTGGACGATGATTCAAGAGATCATCGTCCAGCTCACAAGGTTTTTTTTGct  
cgagctggcgaattcc  
>CD\_NM\_000591:243  
CgCctGcgagtctGGtatGAAGCCCGACTGGTCCGAAGCCTTTCAAGAGAAGGCTTCGGACCAGTCGGGCTGTTTTTTGct  
cgagctggcgaattcc  
>CD\_NM\_000591:277  
CgCctGcgagtctGGtatGATGCAGTAGAGGTGGAGATTCATTTCAAGAGATGGATCTCCACCTCTACTGCAGTTTTTGct  
cgagctggcgaattcc  
>CD\_NM\_000591:603  
CgCctGcgagtctGGtatGACCGAGCTGCAGCAGTGGCTCATTTCAAGAGATGAGCCACTGCTGCAGCTCGGCTTTTTTGct  
cgagctggcgaattcc  
>CD\_NM\_000591:628

CgCctGcgagtctGGtatGAAGGCCTCAAGGTACTGAGCATTTC AAGAGAATGCTCAGTACCTTGAGGCCTGTTTTTGct  
cgagctggcgaattcc  
>CD\_NM\_000591.1:1065  
CgCctGcgagtctGGtatGAACGAGCTGCCGAGGTGGATATTC AAGAGATATCCACCTCGGGCAGCTCGTCTTTTTTGct  
cgagctggcgaattcc  
>CD\_NM\_000591.1:442  
CgCctGcgagtctGGtatGAGCCCTGCGTGTGCTAGCGTACTT CAAGAGAGTACGCTAGCACACGCAGGGCGTTTTTGct  
cgagctggcgaattcc  
>CD\_NM\_000591.1:298  
CgCctGcgagtctGGtatGCGCCGGCGGTCTCAACCTAGAGTT CAAGAGACTCTAGGTTGAGACCGCCGGCATTTTTTTGct  
cgagctggcgaattcc  
>CD\_NM\_000591.1:213  
CgCctGcgagtctGGtatGCCGCTGCGTCTGCAACTTCTCTT CAAGAGAGAGAAGTTGCAGACGCAGCGGATTTTTTGct  
cgagctggcgaattcc  
>CD\_NM\_000591.1:1078  
CgCctGcgagtctGGtatGAGTGGATAACCTGACACTGGACTT CAAGAGAGTCCAGTGT CAGGTTATCCACCTTTTTTGct  
cgagctggcgaattcc  
>CD\_NM\_000591.1:1018  
CgCctGcgagtctGGtatGCGTGCTCGATCTCAGCTGCAACTT CAAGAGAGTTCAGCTGAGATCGAGCACTTTTTTGct  
cgagctggcgaattcc  
>CD\_NM\_000591.1:364  
CgCctGcgagtctGGtatGCGCTGACACGGTCAAGGCTCTCTT CAAGAGAGAGAGCCTTGACCGTGCAGCATTTTTTTGct  
cgagctggcgaattcc  
>CD\_NM\_000591.1:976  
CgCctGcgagtctGGtatGCGGGCTGGAACAGGTGCCTAAATT CAAGAGATTTAGGCACCTGTTCCAGCCCATTTTTTTGct  
cgagctggcgaattcc  
>CD\_NM\_000591.1:1011  
CgCctGcgagtctGGtatGCGCTCAGAGTGCTCGATCTCAGTT CAAGAGACTGAGATCGAGCACTCTGAGCTTTTTTGct  
cgagctggcgaattcc  
>CD\_NM\_000591.1:965  
CgCctGcgagtctGGtatGATGTTCGTTTCGTTGGGCTGGAAC TCAAGAGAGTTCAGCCCAGCGAACGACAGTTTTTGct  
cgagctggcgaattcc  
>CD\_NM\_000591.1:1003  
CgCctGcgagtctGGtatGACCAGCCAAGCTCAGAGTGCTCTT CAAGAGAGAGCACTCTGAGCTTGCTGGCTTTTTTGct  
cgagctggcgaattcc  
>CD\_NM\_000591.1:628  
CgCctGcgagtctGGtatGCGGCCTCAAGGTACTGAGCATTTC AAGAGAAATGCTCAGTACCTTGAGGCCTTTTTTGct  
cgagctggcgaattcc  
>CD\_NM\_000591.1:564  
CgCctGcgagtctGGtatGCACGCAACGTGTCGTGGGCGACTT CAAGAGAGTCGCCACGACACGTTGCGTATTTTTTGct  
cgagctggcgaattcc  
>CD\_NM\_000591.1:187  
CgCctGcgagtctGGtatGCCCTTGTGAGCTGGACGATGAATT CAAGAGATTCATCGTCCAGCTCACAAGTTTTTTGct  
cgagctggcgaattcc  
>CD\_NM\_000591.1:120  
CgCctGcgagtctGGtatGCGGAGCGCGTCCTGCTTGT TTTTCAAGAGAAACAAGCAGGACGCGCTCCATTTTTTTGct  
cgagctggcgaattcc  
>CD\_NM\_000591.1:260  
CgCctGcgagtctGGtatGACCTTCCAGTGTGTGTCTGCAGTT CAAGAGACTGCAGACACACTGGAAGCTTTTTGct  
cgagctggcgaattcc  
>CD\_NM\_000591.1:277  
CgCctGcgagtctGGtatGCGCAGTAGAGGTGGAGATCCATTT CAAGAGAATGGATCTCCACCTCTACTGCATTTTTTGct  
cgagctggcgaattcc  
>CD\_NM\_000591.1:709

CgCctGcgagtctGGtatGAAGCCTAGACCTGTCTGACAATTTCAAGAGAATTGTCAGACAGGTCTAGGCTGTTTTTGct  
cgagctggcgaattcc  
>CD\_NM\_000591.1:1090  
CgCctGcgagtctGGtatGAACACTGGACGGGAATCCCTTCTTCAAGAGAGAAGGGATTCCCGTCCAGTGTCTTTTTTGct  
cgagctggcgaattcc  
>CD\_NM\_000591.1:262  
CgCctGcgagtctGGtatGATTCCAGTGTGTGTCTGCAGTATTCAAGAGATACTGCAGACACACACTGGAAGTTTTTGct  
cgagctggcgaattcc  
>CD\_NM\_000591.1:874  
CgCctGcgagtctGGtatGAAGCCTAGACCTCAGCCACAACCTTCAAGAGAGTTGTGGCTGAGGTCTAGGCTGTTTTTGct  
cgagctggcgaattcc  
>CD\_NM\_000591.1:967  
CgCctGcgagtctGGtatGATCGTTTCGCTGGGCTGGAACAGTTCAAGAGACTGTTCCAGCCCAGCGAACGACTTTTTTGct  
cgagctggcgaattcc  
>CD\_NM\_000591.1:1084  
CgCctGcgagtctGGtatGCAACCTGACACTGGACGGGAATTTCAAGAGAATTCCCGTCCAGTGTGAGTTATTTTTTGct  
cgagctggcgaattcc  
>CD\_NM\_000591.1:946  
CgCctGcgagtctGGtatGAGCCCTGAACTCCCTCAATCTGTTCAAGAGACAGATTGAGGGAGTTCAGGGCGTTTTTGct  
cgagctggcgaattcc  
>CD\_NM\_000591.1:309  
CgCctGcgagtctGGtatGCCAACCTAGAGCCGTTTCTAAATTTCAAGAGATTTAGAAACGGCTCTAGGTTGTTTTTGct  
cgagctggcgaattcc  
>CD\_NM\_000591.1:512  
CgCctGcgagtctGGtatGCTGCCTCCGCTGCCTCTGGAAGTTCAAGAGACTTCCAGAGGCAGCGGAGGCATTTTTTGct  
cgagctggcgaattcc  
>CD\_NM\_000591.1:895  
CgCctGcgagtctGGtatGATCGCTGCGCGCCACCGTAAACTTCAAGAGAGTTTACGGTGGCGCGCAGCGAGTTTTTGct  
cgagctggcgaattcc  
>CD\_NM\_000569:309  
CgCctGcgagtctGGtatGCCCCAACTGCTCTGCTACTTCTTTCAAGAGAAGAAGTAGCAGAGCAGTTGGGATTTTTTGct  
cgagctggcgaattcc  
>CD\_NM\_000569:336  
CgCctGcgagtctGGtatGAAGCTGGCATGCGGACTGAAGATTTCAAGAGATCTTCAGTCCGCATGCCAGCTGTTTTTGct  
cgagctggcgaattcc  
>CD\_NM\_000569:585  
CgCctGcgagtctGGtatGCCCCGGTGCAGCTAGAAGTCCATTTCAAGAGATGGACTTCTAGCTGCACCGGGTTTTTGct  
cgagctggcgaattcc  
>CD\_NM\_000569:693  
CgCctGcgagtctGGtatGATGCTCTGCATAAGGTCACATATTCAAGAGATATGTGACCTTATGCAGAGCAGTTTTTGct  
cgagctggcgaattcc  
>CD\_NM\_000569.6:914  
CgCctGcgagtctGGtatGCAGTCTCTTTCTGCTTGGTGATTTCAAGAGAATCACCAAGCAGAAAGAGACTTTTTTGct  
cgagctggcgaattcc  
>CD\_NM\_000569.6:248  
CgCctGcgagtctGGtatGAGCTCCGGATATCTTTGGTGACTTCAAGAGAGTCAACAAAGATATCCGGAGCCTTTTTTGct  
cgagctggcgaattcc  
>CD\_NM\_000569.6:414  
CgCctGcgagtctGGtatGAAGTGTGACTCTGAAGTGCCAGTTCAAGAGACTGGCACTTCAGAGTCACACTGTTTTTGct  
cgagctggcgaattcc  
>CD\_NM\_000569.6:458  
CgCctGcgagtctGGtatGCTTCCACACAGTGGTTTCAATTTCAAGAGATTTGTGAAACCACTGTGTGGAATTTTTTGct  
cgagctggcgaattcc  
>CD\_NM\_000569.6:693A

CgCctGcgagtctGGtatGCGCTCTGCATAAGGTCACATATTTCAAGAGAATATGTGACCTTATGCAGAGCATTTTTGct  
cgagctggcgaattcc  
>CD\_NM\_000569.6:693B  
CgCctGcgagtctGGtatGCCTGCATAAGGTCACATATTTATTCAAGAGATAAATATGTGACCTTATGCAGATTTTTGct  
cgagctggcgaattcc  
>CD\_NM\_000569.6:785  
CgCctGcgagtctGGtatGCAGACAGCGGCTCCTACTTCTGTTCAAGAGACAGAAGTAGGAGCCGCTGTCTTTTTTTGct  
cgagctggcgaattcc  
>CD\_NM\_000569.6:630  
CgCctGcgagtctGGtatGACCTCGGTGGGTGTTCAAGGAGTTCAAGAGACTCCTTGAACACCCACCGAGGGTTTTTgct  
cgagctggcgaattcc  
>CD\_NM\_000569.6:579  
CgCctGcgagtctGGtatGAAGTGACCCGGTGCAGCTAGAATTCAAGAGATTCTAGCTGCACCGGGTCACTGTTTTTgct  
cgagctggcgaattcc  
>CD\_NM\_000569.6:960  
CgCctGcgagtctGGtatGCGGACTATATTTCTCTGTGAAGTTCAAGAGACTTCACAGAGAAATATAGTCCTTTTTTgct  
cgagctggcgaattcc  
>CD\_NM\_000569.6:309  
CgCctGcgagtctGGtatGACCAACTGCTCTGCTACTTCTATTCAAGAGATAGAAGTAGCAGAGCAGTTGGTTTTTgct  
cgagctggcgaattcc  
>CD\_NM\_000569.6:462  
CgCctGcgagtctGGtatGAACACAGTGGTTTCACAATGAGTTCAAGAGACTCATTGTGAAACCACTGTGTGTTTTTgct  
cgagctggcgaattcc  
>CD\_NM\_000569.6:966  
CgCctGcgagtctGGtatGCTATTTCTCTGTGAAGACAAACTTCAAGAGAGTTTGTCTTTCACAGAGAAATATTTTTTgct  
cgagctggcgaattcc  
>CD\_NM\_000569.6:304  
CgCctGcgagtctGGtatGATCCTCCCAACTGCTCTGCTACTTCAAGAGAGTAGCAGAGCAGTTGGGAGGAGTTTTTgct  
cgagctggcgaattcc  
>CD\_NM\_000569.6:460  
CgCctGcgagtctGGtatGCCACACAGTGGTTTCACAATGTTCAAGAGACATTGTGAAACCACTGTGTGGATTTTTgct  
cgagctggcgaattcc  
>CD\_NM\_000569.6:878  
CgCctGcgagtctGGtatGCGTCAACCATCTCATCTTTTCAAGAGAAAGAATGATGAGATGGTTGACATTTTTTgct  
cgagctggcgaattcc  
>CD\_NM\_000569.6:545  
CgCctGcgagtctGGtatGAAGAGTACAGGTGCCAGACAAATTCAGAGATTTGTCTGGCACCTGTACTCTTTTTTgct  
cgagctggcgaattcc  
>CD\_NM\_000569.6:657  
CgCctGcgagtctGGtatGACCTATTCACCTGAGGTGTCACTTCAAGAGAGTGACACCTCAGGTGAATAGGGTTTTTgct  
cgagctggcgaattcc  
>CD\_NM\_000569.6:408  
CgCctGcgagtctGGtatGAAAGGACAGTGTGACTCTGAAGTTCAAGAGACTTCAGAGTCACACTGTCTTCTTTTTTgct  
cgagctggcgaattcc  
>CD\_NM\_000569.6:895  
CgCctGcgagtctGGtatGCTCTTTCCACCTGGGTACCAAGTTCAAGAGACTTGGTACCCAGGTGGAAAGAATTTTTTgct  
cgagctggcgaattcc  
>CD\_NM\_000569.6:238  
CgCctGcgagtctGGtatGATCCCTTTAGGGCTCCGGATATTTCAAGAGAATATCCGGAGCCCTAAAGGGACTTTTTTgct  
cgagctggcgaattcc  
>CD\_NM\_000569.6:225  
CgCctGcgagtctGGtatGCCTAGTCGGTTTGGTCCCTTTATTCAAGAGATAAAGGGACCAACCGACTAGATTTTTTgct  
cgagctggcgaattcc  
>CD\_NM\_000569.6:708



CgCtGcgagtctGGtatGAACATATTTACAGAATGGCAAATTC AAGAGATTTGCCATTCTGTAAATATGTGTTTTTgct  
cgagctggcgaattcc  
>CD\_NM\_000569.6:979  
CgCtGcgagtctGGtatGCAGACAAACATTCGAAGCTCAATTC AAGAGATTGAGCTTCGAATGTTGTCTTTTTTgct  
cgagctggcgaattcc  
>CD\_NM\_000569.6:869  
CgCtGcgagtctGGtatGATTTGGCAGTGTCAACCATCTCTTC AAGAGAGAGATGGTTGACACTGCCAAACTTTTTGct  
cgagctggcgaattcc  
>CD\_NM\_000569.6:837  
CgCtGcgagtctGGtatGCTCAGAGACTGTGAACATCACCTTC AAGAGAGGTGATGTTACAGTCTCTGAATTTTTGct  
cgagctggcgaattcc  
>CD\_NM\_000569.6:1002  
CgCtGcgagtctGGtatGCAGAGACTGGAAGGACCATAAATTC AAGAGATTTATGGTCTTCCAGTCTCTTTTTTgct  
cgagctggcgaattcc  
>CD\_NM\_000569.6:360  
CgCtGcgagtctGGtatGACCAAAGGCTGTGGTGTTCCTGTTCA AAGAGACAGGAACACCACAGCCTTTGGGTTTTTgct  
cgagctggcgaattcc  
>CD\_NM\_000569.6:333  
CgCtGcgagtctGGtatGCTCAGCTGGCATGCGGACTGAATTC AAGAGATTCAGTCCGCATGCCAGCTGAATTTTTGct  
cgagctggcgaattcc  
>CD\_NM\_000569:34  
CgCtGcgagtctGGtatGCCCAACTGCTCTGCTACTTCTTTTCA AAGAGAAGAAGTAGCAGAGCAGTTGGGATTTTTGct  
cgagctggcgaattcc  
>CD\_NM\_000569:61  
CgCtGcgagtctGGtatGAAGCTGGCATGCGGACTGAAGATTC AAGAGATCTTCAGTCCGCATGCCAGCTGTTTTTgct  
cgagctggcgaattcc  
>CD\_NM\_000569:310  
CgCtGcgagtctGGtatGCCCCGGTGCAGCTAGAAGTCCATTC AAGAGATGGACTTCTAGCTGCACCGGGTTTTTgct  
cgagctggcgaattcc  
>CD\_NM\_000569:418  
CgCtGcgagtctGGtatGATGCTCTGCATAAGGTCACATATTC AAGAGATATGTGACCTTATGCAGAGCAGTTTTTgct  
cgagctggcgaattcc  
>CD\_NM\_000570.2:639  
CgCtGcgagtctGGtatGCAGTCTCTTTCTGCTTGGTGATTTCA AAGAGAATCACCAAGCAGAAAGAGACTTTTTTgct  
cgagctggcgaattcc  
>CD\_NM\_000570.2:139  
CgCtGcgagtctGGtatGAAGTGTGACTCTGAAGTGCCAGTTCA AAGAGACTGGCACTTCAGAGTCACACTGTTTTTgct  
cgagctggcgaattcc  
>CD\_NM\_000570.2:183  
CgCtGcgagtctGGtatGCTTCCACACAGTGGTTTCACAATTC AAGAGATTGTGAAACCACTGTGTGGAATTTTTTgct  
cgagctggcgaattcc  
>CD\_NM\_000570.2:418A  
CgCtGcgagtctGGtatGCGCTCTGCATAAGGTCACATATTTCA AAGAGAATATGTGACCTTATGCAGAGCATTTTTTgct  
cgagctggcgaattcc  
>CD\_NM\_000570.2:620  
CgCtGcgagtctGGtatGCTCTCTCCACCTGGGTACCAAGTTCA AAGAGACTTGGTACCCAGGTGGAGAGAATTTTTGct  
cgagctggcgaattcc  
>CD\_NM\_000570.2:418B  
CgCtGcgagtctGGtatGCCTGCATAAGGTCACATATTTATTC AAGAGATAAATATGTGACCTTATGCAGATTTTTGct  
cgagctggcgaattcc  
>CD\_NM\_000570.2:355  
CgCtGcgagtctGGtatGACCTCGGTGGGTGTTCAAGGAGTTCA AAGAGACTCCTTGAACACCCACCGAGGGTTTTTgct  
cgagctggcgaattcc  
>CD\_NM\_000570.2:304

CgCctGcgagtctGGtatGAAGTGACCCGGTGCAGCTAGAATTCAAGAGATTCTAGCTGCACCGGGTCACTGTTTTTGct  
cgagctggcgaattcc  
>CD\_NM\_000570.2:685  
CgCctGcgagtctGGtatGCGGACTATATTTCTCTGTGAAGTTCAAGAGACTTCACAGAGAAATATAGTCCTTTTTTGct  
cgagctggcgaattcc  
>CD\_NM\_000570.2:34  
CgCctGcgagtctGGtatGACCAACTGCTCTGCTACTTCTATTCAAGAGATAGAAGTAGCAGAGCAGTTGGGTTTTTGct  
cgagctggcgaattcc  
>CD\_NM\_000570.2:187  
CgCctGcgagtctGGtatGAACACAGTGGTTTCACAATGAGTTCAAGAGACTCATTGTGAAACCACTGTGTGTTTTTGct  
cgagctggcgaattcc  
>CD\_NM\_000570.2:691  
CgCctGcgagtctGGtatGCTATTTCTCTGTGAAGACAACTTCAAGAGAGTTTGTCTTCACAGAGAAATATTTTTTGct  
cgagctggcgaattcc  
>CD\_NM\_000570.2:29  
CgCctGcgagtctGGtatGATCCTCCCAACTGCTCTGCTACTTCAAGAGAGTAGCAGAGCAGTTGGGAGGAGTTTTTGct  
cgagctggcgaattcc  
>CD\_NM\_000570.2:185  
CgCctGcgagtctGGtatGCCCACACAGTGGTTTCACAATGTTCAAGAGACATTGTGAAACCACTGTGTGGATTTTTTGct  
cgagctggcgaattcc  
>CD\_NM\_000570.2:603  
CgCctGcgagtctGGtatGCGTCAACCATCTCATCTCTTCAAGAGAGAGAATGATGAGATGGTTGACATTTTTTGct  
cgagctggcgaattcc  
>CD\_NM\_000570.2:270  
CgCctGcgagtctGGtatGAAGAGTACAGGTGCCAGACAAATTCAAGAGATTTGTCTGGCACCTGTACTCTTTTTTGct  
cgagctggcgaattcc  
>CD\_NM\_000570.2:382  
CgCctGcgagtctGGtatGACCTATTCACCTGAGGTGTCACTTCAAGAGAGTGACACCTCAGGTGAATAGGGTTTTTGct  
cgagctggcgaattcc  
>CD\_NM\_000570.2:133  
CgCctGcgagtctGGtatGAAAGGACAGTGTGACTCTGAAGTTCAAGAGACTTCAGAGTCACACTGTCCTTCTTTTTTGct  
cgagctggcgaattcc  
>CD\_NM\_000570.2:510  
CgCctGcgagtctGGtatGCAGATAGCGCTCCTACTTCTGTTCAGAGACAGAAGTAGGAGCCGCTATCTTTTTTGct  
cgagctggcgaattcc  
>CD\_NM\_000570.2:433  
CgCctGcgagtctGGtatGAACATATTTACAGAATGGCAAATTCAAGAGATTTGCCATTCTGTAAATATGTGTTTTTGct  
cgagctggcgaattcc  
>CD\_NM\_000570.2:196  
CgCctGcgagtctGGtatGATTTCACAATGAGAACCTCATCTTCAAGAGAGATGAGGTTCTCATTGTGAAACTTTTTTGct  
cgagctggcgaattcc  
>CD\_NM\_000570.2:594  
CgCctGcgagtctGGtatGATTTGGCAGTGTCAACCATCTCTTCAAGAGAGAGATGGTTGACACTGCCAAACTTTTTTGct  
cgagctggcgaattcc  
>CD\_NM\_000570.2:562  
CgCctGcgagtctGGtatGCTCAGAGACTGTGAACATCACCTTCAAGAGAGGTGATGTTACAGTCTCTGAATTTTTTGct  
cgagctggcgaattcc  
>CD\_NM\_000570.2:85  
CgCctGcgagtctGGtatGACCAAAGGCTGTGGTGTTCCTGTTCAAGAGACAGGAACACCACAGCCTTTGGGTTTTTGct  
cgagctggcgaattcc  
>CD\_NM\_000570.2:58  
CgCctGcgagtctGGtatGCTCAGCTGGCATGCGGACTGAATTCAAGAGATTCAGTCCGCATGCCAGCTGAATTTTTTGct  
cgagctggcgaattcc  
>CD\_NM\_000570.2:302

CgCctGcgagtctGGtatGATCAGTGACCCGGTGCAGCTAGTTCAAGAGACTAGCTGCACCGGGTCACTGAGTTTTTGct  
cgagctggcgaattcc  
>CD\_NM\_000570.2:687  
CgCctGcgagtctGGtatGAACTATATTTCTCTGTGAAGACTTCAAGAGAGTCTTACAGAGAAATATAGTCTTTTTTGct  
cgagctggcgaattcc  
>CD\_NM\_000570.2:331  
CgCctGcgagtctGGtatGCGTCGGCTGGCTGTTGCTCCAGTTCAAGAGACTGGAGCAACAGCCAGCCGACATTTTTTGct  
cgagctggcgaattcc  
>CD\_NM\_000570.2:588  
CgCctGcgagtctGGtatGATCAAGGTTTGGCAGTGTCAACTTCAAGAGAGTTGACACTGCCAAACCTTGAGTTTTTGct  
cgagctggcgaattcc  
>CD\_NM\_000211:1955  
CgCctGcgagtctGGtatGACGCCGAGTGCCTGAAGTTCGATTCAAGAGATCGAACTTCAGGCACTCGGCGCTTTTTTGct  
cgagctggcgaattcc  
>CD\_NM\_000211:193  
CgCctGcgagtctGGtatGACCGGCTGCACCTGGTGCCAGATTCAAGAGATCTGGCACCAGGTGCAGCCGGGTTTTTGct  
cgagctggcgaattcc  
>CD\_NM\_000211:2110  
CgCctGcgagtctGGtatGAACGGGATGGACCGCTACCTCATTCAAGAGATGAGGTAGCGGTCCATCCCGTCTTTTTTGct  
cgagctggcgaattcc  
>CD\_NM\_000211:2269  
CgCctGcgagtctGGtatGAGGGAGTACAGGCGCTTTGAGATTCAAGAGATCTCAAAGCGCTGTACTCCCGTTTTTGct  
cgagctggcgaattcc  
>CD\_NM\_000211:1357  
CgCctGcgagtctGGtatGAGGGCGCTGGGCTTACGGACATTCAAGAGATGTCCGTGAAGCCCAGCGCCCGTTTTTGct  
cgagctggcgaattcc  
>CD\_NM\_000211.1:1124  
CgCctGcgagtctGGtatGCGTGGTCCATCTCATTAAAGAATTTCAAGAGAATTCTTAATGAGATGGACCACATTTTTTGct  
cgagctggcgaattcc  
>CD\_NM\_000211.1:1268  
CgCctGcgagtctGGtatGATGTGATGGCGTGCAGATCAATTTCAAGAGAATTGATCTGCACGCCATCACAGTTTTTGct  
cgagctggcgaattcc  
>CD\_NM\_000211.1:2044  
CgCctGcgagtctGGtatGCGGGCAGGACCTGCAAGGAGAGTTCAAGAGACTCTCCTTGCAGGTCTGCCCTTTTTTGct  
cgagctggcgaattcc  
>CD\_NM\_000211.1:1955  
CgCctGcgagtctGGtatGAGCCGAGTGCCTGAAGTTCGAATTTCAAGAGATTCGAACTTCAGGCACTCGGCGTTTTTGct  
cgagctggcgaattcc  
>CD\_NM\_000211.1:1676  
CgCctGcgagtctGGtatGATGTGACACCATCAACTGTGAGTTCAAGAGACTCACAGTTGATGGTGTACACTTTTTTGct  
cgagctggcgaattcc  
>CD\_NM\_000211.1:476  
CgCctGcgagtctGGtatGATCCTACTCCATGCTTGATGACTTCAAGAGAGTCATCAAGCATGGAGTAGGAGTTTTTGct  
cgagctggcgaattcc  
>CD\_NM\_000211.1:1615  
CgCctGcgagtctGGtatGAGCAGTGCCTGTGCCACACCAGTTCAAGAGACTGGTGTGGCACAGGCACTGCCTTTTTGct  
cgagctggcgaattcc  
>CD\_NM\_000211.1:1199  
CgCctGcgagtctGGtatGAACCTGAAAGTCACCTACGACTTCAAGAGAGTCGTAGGTGACTTTCAGGGTGTTTTTTGct  
cgagctggcgaattcc  
>CD\_NM\_000211.1:193  
CgCctGcgagtctGGtatGACGGCTGCACCTGGTGCCAGAATTTCAAGAGATTTCTGGCACCAGGTGCAGCCGGTTTTTGct  
cgagctggcgaattcc  
>CD\_NM\_000211.1:1852

CgCctGcgagtctGGtatGACCGGTGCCGCTGCAACGTATGTTCAAGAGACATACGTTGCAGCGGCACCGGCTTTTTGct  
cgagctggcgaattcc  
>CD\_NM\_000211.1:2303  
CgCctGcgagtctGGtatGATCCCAGTGAACAATGATAATTTCAAGAGAATTATCATTGTTCCACTGGGACTTTTTGct  
cgagctggcgaattcc  
>CD\_NM\_000211.1:689  
CgCctGcgagtctGGtatGAGTGCTGAAGCTGACCAACAACCTTCAAGAGAGTTGTTGGTCAGCTTCAGCACGTTTTGct  
cgagctggcgaattcc  
>CD\_NM\_000211.1:1166  
CgCctGcgagtctGGtatGAAGGGTCTTCTGGATCACAACCTTCAAGAGAGTTGTGATCCAGGAAGACCCTGTTTTGct  
cgagctggcgaattcc  
>CD\_NM\_000211.1:2015  
CgCctGcgagtctGGtatGAGGCCTGCAGCTGTCGAACAACCTTCAAGAGAGTTGTTGACAGCTGCAGGCCCTTTTTGct  
cgagctggcgaattcc  
>CD\_NM\_000211.1:2222  
CgCctGcgagtctGGtatGCCTCTGCTGGTCATCTGGAAGTTCAAGAGACTTCCAGATGACCAGCAGGAGATTTTTGct  
cgagctggcgaattcc  
>CD\_NM\_000211.1:1291  
CgCctGcgagtctGGtatGCCCCGATCACCTTCCAGGTGAATTCAAGAGATTCACCTGGAAGGTGATCGGGATTTTTGct  
cgagctggcgaattcc  
>CD\_NM\_000211.1:1435  
CgCctGcgagtctGGtatGCCCCGAGCCTCTGCCATGGCAATTCAAGAGATTGCCATGGCAGAGGCTGCGGTTTTGct  
cgagctggcgaattcc  
>CD\_NM\_000211.1:1322  
CgCctGcgagtctGGtatGAACAGAGTGCATCCAGGAGCAGTTCAAGAGACTGCTCCTGGATGCACTCTGTGTTTTGct  
cgagctggcgaattcc  
>CD\_NM\_000211.1:1482  
CgCctGcgagtctGGtatGCGGTGTGACACTGGCTACATTGTTCAAGAGACAATGTAGCCAGTGTACACCTTTTTGct  
cgagctggcgaattcc  
>CD\_NM\_000211.1:485  
CgCctGcgagtctGGtatGAATGCTTGATGACCTCAGGAATTTCAAGAGAATTCCTGAGGTCATCAAGCATGTTTTGct  
cgagctggcgaattcc  
>CD\_NM\_000211.1:241  
CgCctGcgagtctGGtatGATGACTCCATTCGCTGCGACACTTCAAGAGAGTGTGCGCAGCGAATGGAGTCAGTTTTGct  
cgagctggcgaattcc  
>CD\_NM\_000211.1:157  
CgCctGcgagtctGGtatGCGGTGACGAGCTGCCGGGAATGTTCAAGAGACATTCCTGGCAGCTGCTGACCTTTTTGct  
cgagctggcgaattcc  
>CD\_NM\_000211.1:536  
CgCctGcgagtctGGtatGAGCCCTCAACGAGATCACCGAGTTCAAGAGACTCGGTGATCTCGTTGAGGGCCTTTTTGct  
cgagctggcgaattcc  
>CD\_NM\_000211.1:1600  
CgCctGcgagtctGGtatGAGGACTGTGTCTGCGGGCAGTGTTCAGAGACACTGCCCCGAGACACAGTCCCTTTTTGct  
cgagctggcgaattcc  
>CD\_NM\_000211.1:857  
CgCctGcgagtctGGtatGAACTGATGACGGCTTCCATTTCTTCAAGAGAGAAATGGAAGCCGTATCAGTGTTTTTGct  
cgagctggcgaattcc  
>CD\_NM\_000211.1:1670  
CgCctGcgagtctGGtatGATGCGAGTGTGACACCATCAACCTTCAAGAGAGTTGATGGTGTCACTCGCAGTTTTGct  
cgagctggcgaattcc  
>CD\_NM\_000211.1:2282  
CgCctGcgagtctGGtatGATTTGAGAAGGAGAAGCTCAAGTTCAAGAGACTTGAGCTTCTCCTTCTCAAAGTTTTGct  
cgagctggcgaattcc  
>CD\_NM\_000211.1:1894

CgCtGcgagtctGGtatGCGCTGCCTCTGTGCCAGGAGTGTTC AAGAGACACTCCTGGCACAGAGGCAGCTTTTTTGct  
cgagctggcgaattcc  
>CD\_NM\_001770:363  
CgCtGcgagtctGGtatGCGGCAGCCTGGCTGGACAGTCATTCAAGAGATGACTGTCCAGCCAGGCTGCCATTTTTGct  
cgagctggcgaattcc  
>CD\_NM\_001770:747  
CgCtGcgagtctGGtatGACGGCCAGAGATATGTGGGTAATTCAAGAGATTACCCACATATCTCTGGCCGGTTTTTGct  
cgagctggcgaattcc  
>CD\_NM\_001770:799  
CgCtGcgagtctGGtatGAAGCTCAAGACGCTGGAAAGTATTCAAGAGATACTTCCAGCGTCTTGAGCTGTTTTTGct  
cgagctggcgaattcc  
>CD\_NM\_001770:988  
CgCtGcgagtctGGtatGAAGCCCTGGTCCCTGAGGAGGAATTCAAGAGATTCCTCCTCAGGACCAGGGCTTTTTTGct  
cgagctggcgaattcc  
>CD\_NM\_001770:1449  
CgCtGcgagtctGGtatGCCCCAGCCGGTCGCCAGGACAATTCAAGAGATTGTCTGGCGACCCGGCTGGGTTTTTGct  
cgagctggcgaattcc  
>CD\_NM\_001770:1545  
CgCtGcgagtctGGtatGAAGGATATGAGAGGAATCCTGTTTCAAGAGAACAGGATTCCTCTCATATCCTTTTTTGct  
cgagctggcgaattcc  
>CD\_NM\_001770.3:1290  
CgCtGcgagtctGGtatGCGGACTCCGAGTCTATGAGAATTCAAGAGATTCTCATAGAACTCGGAGTCTTTTTGct  
cgagctggcgaattcc  
>CD\_NM\_001770.3:924  
CgCtGcgagtctGGtatGATGTGACTTTGGCTTATCTGATTTCAAGAGAATCAGATAAGCCAAAGTCACAGTTTTTGct  
cgagctggcgaattcc  
>CD\_NM\_001770.3:402  
CgCtGcgagtctGGtatGCGCTGTTCCGGTGAATGTTTCTTCAAGAGAGAAACATTCCACCGGAACAGCTTTTTTGct  
cgagctggcgaattcc  
>CD\_NM\_001770.3:1620  
CgCtGcgagtctGGtatGCAGATGCAGACTCTTATGAGAATTCAAGAGATTCTCATAAGAGTCTGCATTTTTTGct  
cgagctggcgaattcc  
>CD\_NM\_001770.3:1601  
CgCtGcgagtctGGtatGACTGGACCCAATCATGAGGAAGTTCAAGAGACTTCCTCATGATTGGGTCCAGGTTTTTGct  
cgagctggcgaattcc  
>CD\_NM\_001770.3:363  
CgCtGcgagtctGGtatGAGCAGCCTGGCTGGACAGTCAATTCAAGAGATTGACTGTCCAGCCAGGCTGCCTTTTTTGct  
cgagctggcgaattcc  
>CD\_NM\_001770.3:939  
CgCtGcgagtctGGtatGCTCTGATCTTCTGCCTGTGTTCTTCAAGAGAGAACACAGGCAGAAGATCAGATTTTTTGct  
cgagctggcgaattcc  
>CD\_NM\_001770.3:988  
CgCtGcgagtctGGtatGCGCCCTGGTCCCTGAGGAGGAATTCAAGAGATTCCTCCTCAGGACCAGGGCTTTTTTGct  
cgagctggcgaattcc  
>CD\_NM\_001770.3:1630  
CgCtGcgagtctGGtatGATCTTATGAGAACATGGATAATTTCAAGAGAAATTATCCATGTTCTCATAAGAGTTTTTGct  
cgagctggcgaattcc  
>CD\_NM\_001770.3:1339  
CgCtGcgagtctGGtatGATCCCAGGATGGCAGCGGCTACTTCAAGAGAGTAGCCGCTGCCATCCTGGGAGTTTTTGct  
cgagctggcgaattcc  
>CD\_NM\_001770.3:958  
CgCtGcgagtctGGtatGCTCCCTTGTGGGCATTCTTCATTTCAAGAGAATGAAGAATGCCACAAGGGAATTTTTTGct  
cgagctggcgaattcc  
>CD\_NM\_001770.3:968

CgCctGcgagtctGGtatGAGCATTCTTCATCTTCAAAGAGTTCAAGAGACTCTTTGAAGATGAAGAATGCCTTTTTTGct  
cgagctggcgaattcc  
>CD\_NM\_001770.3:800  
CgCctGcgagtctGGtatGACTCAAGACGCTGGAAAGTATTTTCAAGAGAAATACTTTCCAGCGTCTTGAGCTTTTTTGct  
cgagctggcgaattcc  
>CD\_NM\_001770.3:49  
CgCctGcgagtctGGtatGCCCTCCTCGCCTCCTCTTCTTCTTCAAGAGAGAAGAAGAGGAGGCGAGGAGGTTTTTTTGct  
cgagctggcgaattcc  
>CD\_NM\_001770.3:1449  
CgCctGcgagtctGGtatGACCAGCCGGTCGCCAGGACAATTTCAAGAGAATTGTCCTGGCGACCGGCTGGGTTTTTTTGct  
cgagctggcgaattcc  
>CD\_NM\_001770.3:1232  
CgCctGcgagtctGGtatGACGGGAGTGGGCCCAGAAGAAGTTCAAGAGACTTCTTCTGGGCCACTCCCGTTTTTTTGct  
cgagctggcgaattcc  
>CD\_NM\_001770.3:1535  
CgCctGcgagtctGGtatGAAGTCCTATGAGGATATGAGAGTTCAAGAGACTTCATATCCTCATAGGACTGTTTTTTGct  
cgagctggcgaattcc  
>CD\_NM\_001770.3:436  
CgCctGcgagtctGGtatGACTGGGCTGTGGCCTGAAGAACTTCAAGAGAGTTCTTCAGGCCACAGCCCAGTTTTTTGct  
cgagctggcgaattcc  
>CD\_NM\_001770.3:751  
CgCctGcgagtctGGtatGAAGAGATATGTGGGTAATGGAGTTCAAGAGACTCCATTACCCACATATCTCTGTTTTTTGct  
cgagctggcgaattcc  
>CD\_NM\_001770.3:922  
CgCctGcgagtctGGtatGCGCTGTGACTTTGGCTTATCTGTTCAAGAGACAGATAAGCCAAAGTCACAGCTTTTTTTGct  
cgagctggcgaattcc  
>CD\_NM\_001770.3:370  
CgCctGcgagtctGGtatGCGGCTGGACAGTCAATGTGGAGTTCAAGAGACTCCACATTGACTGTCCAGCCATTTTTTGct  
cgagctggcgaattcc  
>CD\_NM\_001770.3:1032  
CgCctGcgagtctGGtatGACAGGAGATTCTTCAAAGTGACTTCAAGAGAGTCACTTTGAAGAATCTCCTGGTTTTTTGct  
cgagctggcgaattcc  
>CD\_NM\_001770.3:359  
CgCctGcgagtctGGtatGACCTGGCAGCCTGGCTGGACAGTTCAAGAGACTGTCCAGCCAGGCTGCCAGGTTTTTTGct  
cgagctggcgaattcc  
>CD\_NM\_001770.3:1410  
CgCctGcgagtctGGtatGACAACGCTGAGTCTTATGAGAATTTCAAGAGATTCTCATAAGACTCAGCGTTGGTTTTTTGct  
cgagctggcgaattcc  
>CD\_NM\_001770.3:964  
CgCctGcgagtctGGtatGCGTGGGCATTTCTTCATCTTCAATTCAAGAGATTGAAGATGAAGAATGCCACATTTTTTTGct  
cgagctggcgaattcc  
>CD\_NM\_001770.3:1540  
CgCctGcgagtctGGtatGATATGAGGATATGAGAGGAATCTTCAAGAGAGATTCTCCTCATATCCTCATAGTTTTTTGct  
cgagctggcgaattcc  
>CD\_NM\_001770.3:1529  
CgCctGcgagtctGGtatGAGGTCCCAGTCCATGAGGATATTCAAGAGATATCCTCATAGGACTGGGACCCTTTTTTGct  
cgagctggcgaattcc  
>CD\_NM\_021950:887  
CgCctGcgagtctGGtatGCCACACACCATATATTAACATATTCAAGAGATATGTTAATATATGGTGTGTGATTTTTTTGct  
cgagctggcgaattcc  
>CD\_NM\_021950:741  
CgCctGcgagtctGGtatGCGGAAGTGTGGTCAAAGGAATTTCAAGAGATTCTTTGACCAAACACTTCCTTTTTTTGct  
cgagctggcgaattcc  
>CD\_NM\_021950:1271

CgCtGcgagtctGGtatGCCAGGAATCCTACCAATAGAATTCAAGAGATTCTATTGGTGAGGATTCCTGATTTTTGct  
cgagctggcgaattcc  
>CD\_NM\_152866.2:887  
CgCtGcgagtctGGtatGAACACACCATATATTAACATATTTCAAGAGAATATGTTAATATATGGTGTGTGTTTTGct  
cgagctggcgaattcc  
>CD\_NM\_152866.2:953  
CgCtGcgagtctGGtatGCCCCAATACTGTTACAGCATACTTCAAGAGAGTATGCTGTAACAGTATTGGGTTTTTGGct  
cgagctggcgaattcc  
>CD\_NM\_152866.2:735  
CgCtGcgagtctGGtatGCCTCCAGGAAGTGTGGTCAATTCAAGAGATTGACCAAACACTTCTGGAGTTTTTGGct  
cgagctggcgaattcc  
>CD\_NM\_152866.2:682  
CgCtGcgagtctGGtatGAGGAGGCATTATGTATATTATTTTCAAGAGAAATAATATACATAATGCCTCCCTTTTTGct  
cgagctggcgaattcc  
>CD\_NM\_152866.2:779  
CgCtGcgagtctGGtatGCTGAGCCTCTTGGCTGCCATTTTTCAAGAGAAAATGGCAGCAAAGAGGCTCAATTTTTGct  
cgagctggcgaattcc  
>CD\_NM\_152866.2:972  
CgCtGcgagtctGGtatGCACAATCTCTGTTCTTGGGCATTTCAAGAGAATGCCAAGAACAGAGATTGTATTTTTGct  
cgagctggcgaattcc  
>CD\_NM\_152866.2:814  
CgCtGcgagtctGGtatGCTCAATCATGGACATACTTAATTTCAAGAGAATTAAGTATGTCCATGATTGAATTTTTGct  
cgagctggcgaattcc  
>CD\_NM\_152866.2:919  
CgCtGcgagtctGGtatGCCAGCTAATCCCTCTGAGAAATTTCAAGAGATTTCTCAGAGGGATTAGCTGGTTTTTGGct  
cgagctggcgaattcc  
>CD\_NM\_152866.2:808  
CgCtGcgagtctGGtatGAATTCTTTCAATCATGGACATATTCAAGAGATATGTCCATGATTGAAAGAATCTTTTTGct  
cgagctggcgaattcc  
>CD\_NM\_152866.2:1214  
CgCtGcgagtctGGtatGCTCCAAGAAGAGGAAGAAGAAGTTCAAGAGACTTCTTCTTCTTCTTGGATTTTTTGGct  
cgagctggcgaattcc  
>CD\_NM\_152866.2:1076  
CgCtGcgagtctGGtatGCCAGACCCAAATCTAACATAGTTCAAGAGACTATGTTAGATTTGGGTCTGGATTTTTGct  
cgagctggcgaattcc  
>CD\_NM\_152866.2:1036  
CgCtGcgagtctGGtatGCATAGCTGGCATCGTTGAGAATTTCAAGAGAATTTCTCAACGATGCCAGCTATTTTTTGGct  
cgagctggcgaattcc  
>CD\_NM\_152866.2:621  
CgCtGcgagtctGGtatGCTCTGATGATCCCAGCAGGGATTTCAAGAGAATCCCTGCTGGGATCATCAGAATTTTTGct  
cgagctggcgaattcc  
>CD\_NM\_152866.2:883  
CgCtGcgagtctGGtatGCGCTCACACACCATATATTAACCTTCAAGAGAGTTAATATATGGTGTGTGAGCTTTTTTGGct  
cgagctggcgaattcc  
>CD\_NM\_152866.2:449  
CgCtGcgagtctGGtatGCTCCCGCAGAGCCAATGAAAGTTCAAGAGACTTTCATTGGCTCTGCCGGAATTTTTGct  
cgagctggcgaattcc  
>CD\_NM\_152866.2:1072  
CgCtGcgagtctGGtatGATGCTCCAGACCCAAATCTAACCTTCAAGAGAGTTAGATTTGGGTCTGGAGCACTTTTTGct  
cgagctggcgaattcc  
>CD\_NM\_152866.2:1237  
CgCtGcgagtctGGtatGCACAGAGACGAACTTTCCAGAATTTCAAGAGATTCTGGAAAGTTCTGCTCTGTTTTTGGct  
cgagctggcgaattcc  
>CD\_NM\_152866.2:543

CgCctGcgagtctGGtatGACTTCTTCATGAGGGAATCTAATTCAAGAGATTAGATTCCCTCATGAAGAAGCTTTTTGct  
cgagctggcgaattcc  
>CD\_NM\_152866.2:1271  
CgCctGcgagtctGGtatGAAGGAATCCTCACCAATAGAAATTCAGAGATTTCTATTGGTGAGGATTCCTGTTTTGct  
cgagctggcgaattcc  
>CD\_NM\_152866.2:1164  
CgCctGcgagtctGGtatGATGAAACATCTTCCAACCAAAATTCAGAGATTTGGTTGGGAAGATGTTTCAGTTTTGct  
cgagctggcgaattcc  
>CD\_NM\_152866.2:1154  
CgCctGcgagtctGGtatGATTGGGCTAACTGAAACATCTTTTCAAGAGAAAGATGTTTCAGTTAGCCCAACTTTTTGct  
cgagctggcgaattcc  
>CD\_NM\_152866.2:737  
CgCctGcgagtctGGtatGCCAGGAAGTGTGGTCAAAGTTCAAGAGACTTTGACCAAACACTTCTGGATTTTTGct  
cgagctggcgaattcc  
>CD\_NM\_152866.2:1039  
CgCctGcgagtctGGtatGCGCTGGCATCGTTGAGAATGAATTCAGAGATTCATTCTCAACGATGCCAGCTTTTTGct  
cgagctggcgaattcc  
>CD\_NM\_152866.2:583  
CgCctGcgagtctGGtatGAATTATGAATGGGCTCTTCCACTTCAAGAGAGTGAAGAGCCCATTACATAATTTTTGct  
cgagctggcgaattcc  
>CD\_NM\_152866.2:1204  
CgCctGcgagtctGGtatGCATTATTCCAATCCAAGAAGAGTTCAAGAGACTTCTTGGATTGGAATAATTTTTGct  
cgagctggcgaattcc  
>CD\_NM\_152866.2:443  
CgCctGcgagtctGGtatGAGGACTTTCCCGGCAGAGCCAATTCAGAGATTGGCTCTGCCGGGAAAGTCCCTTTTTGct  
cgagctggcgaattcc  
>CD\_NM\_152866.2:577  
CgCctGcgagtctGGtatGCGTCCAGATTATGAATGGGCTCTTCAAGAGAGAGCCCATTACATAATCTGGACATTTTTGct  
cgagctggcgaattcc  
>CD\_NM\_152866.2:885  
CgCctGcgagtctGGtatGATCACACACCATATATTAACATTTCAAGAGAATGTTAATATATGGTGTGTGAGTTTTGct  
cgagctggcgaattcc  
>CD\_NM\_152866.2:1149  
CgCctGcgagtctGGtatGCAGTGGTTGGGCTAACTGAACTTCAAGAGAGTTTCAGTTAGCCCAACCACTTTTTGct  
cgagctggcgaattcc  
>CD\_NM\_152866.2:802  
CgCctGcgagtctGGtatGCGGAATGATTCTTCAATCATGTTCAAGAGACATGATTGAAAGAATCATTCCATTTTTGct  
cgagctggcgaattcc  
>CD\_NM\_001877:163  
CgCctGcgagtctGGtatGCGGCTCTCTCCGCCTATCTATTCAAGAGATAGGATAGGCGGAGGAGACCATTTTTGct  
cgagctggcgaattcc  
>CD\_NM\_001877:316  
CgCctGcgagtctGGtatGATGGGATAAACCTGCTCCTAAATTCAGAGATTTAGGAGCAGGTTTATCCAGTTTTGct  
cgagctggcgaattcc  
>CD\_NM\_001877:1026  
CgCctGcgagtctGGtatGCAGGAGTGAACCTCATCCTTATTTCAAGAGAATAAGGATGAAGTTCACTCTTTTTGct  
cgagctggcgaattcc  
>CD\_NM\_001877:1768  
CgCctGcgagtctGGtatGCGGGCCAGAAAGAGAGTGAATTCAGAGATTCCTCCTCTTCTGGCCATTTTTGct  
cgagctggcgaattcc  
>CD\_NM\_001877:2336  
CgCctGcgagtctGGtatGCACCAGTTGACTGGACATGCTTTTCAAGAGAAAGCATGTCCAGTCAACTGGTATTTTTGct  
cgagctggcgaattcc  
>CD\_NM\_001877:2549



CgCctGcgagtctGGtatGCTGCAGTGCAGAAGTGATTCTATTCAAGAGATAGAATCACTTCTGCACTGCAATTTTTGct  
cgagctggcgaattcc  
>CD\_NM\_001006658.1:2436  
CgCctGcgagtctGGtatGCCAGTGATTGTCAATGGGAAGTTCAAGAGACTTCCCATTGACAATCACTGGTTTTTTGct  
cgagctggcgaattcc  
>CD\_NM\_001006658.1:895  
CgCctGcgagtctGGtatGCTGCCAGTATGTGAAGAAATTTTTCAAGAGAAAATTTCTTCACATACTGGCATTTTTTGct  
cgagctggcgaattcc  
>CD\_NM\_001006658.1:2688  
CgCctGcgagtctGGtatGCTCCCACAATGACATAGTGTATTTCAAGAGAATACACTATGTCATTGTGGGAATTTTTGct  
cgagctggcgaattcc  
>CD\_NM\_001006658.1:3242  
CgCctGcgagtctGGtatGCTGTCATTACCTTATACGTGATTTCAAGAGAATCACGTATAAGGTAATGACAATTTTTGct  
cgagctggcgaattcc  
>CD\_NM\_001006658.1:2263  
CgCctGcgagtctGGtatGATGAGACAGAGTCTTCAAGAACTTCAAGAGAGTTCTTGAAGACTCTGTCTCACTTTTTGct  
cgagctggcgaattcc  
>CD\_NM\_001006658.1:558  
CgCctGcgagtctGGtatGCGCACTTCCATGATCCACAATTTCAAGAGAATTGTGGATCATAGGAAGTGCTTTTTTTGct  
cgagctggcgaattcc  
>CD\_NM\_001006658.1:2755  
CgCctGcgagtctGGtatGCGGTGTCATACTGATAACACATTTCAAGAGAATGTGTTATCAGTATGACACCTTTTTTTGct  
cgagctggcgaattcc  
>CD\_NM\_001006658.1:2479  
CgCctGcgagtctGGtatGCACTTTCTATATGGAATGAAGTTCAAGAGACTTCATTTCCATATAGAAAGTTTTTTTTGct  
cgagctggcgaattcc  
>CD\_NM\_001006658.1:2520  
CgCctGcgagtctGGtatGCGGATTCTATCTCCTGGGAGAGTTCAAGAGACTCTCCCAGGAGATAGAATCCTTTTTTTGct  
cgagctggcgaattcc  
>CD\_NM\_001006658.1:2198  
CgCctGcgagtctGGtatGCTCACTGTATGCC TTCAGGAAATTTCAAGAGATTTCTGAAGGCATACAGTGAATTTTTGct  
cgagctggcgaattcc  
>CD\_NM\_001006658.1:1965  
CgCctGcgagtctGGtatGAACTGTGACATTTCAAGTGTATTTTCAAGAGAATAACACTTGAATGTCACAGTGTTTTTGct  
cgagctggcgaattcc  
>CD\_NM\_001006658.1:219  
CgCctGcgagtctGGtatGCGTTGGTACCGTGATAAGGTACTTCAAGAGAGTACCTTATCACGGTACCAACATTTTTGct  
cgagctggcgaattcc  
>CD\_NM\_001006658.1:1026  
CgCctGcgagtctGGtatGCGGAGTGAAC TTCATCCTTATTTTTCAAGAGAAATAAGGATGAAGTTCCTCCTTTTTTTGct  
cgagctggcgaattcc  
>CD\_NM\_001006658.1:3130  
CgCctGcgagtctGGtatGAAGTGCCAAATCGGATCACCAATTTCAAGAGAATTGGTGATCCGATTGGCACTGTTTTTTGct  
cgagctggcgaattcc  
>CD\_NM\_001006658.1:968  
CgCctGcgagtctGGtatGCAGCAAATGTCTCATATGGAAGTTCAAGAGACTTCCATATGAGACATTTGCTATTTTTGct  
cgagctggcgaattcc  
>CD\_NM\_001006658.1:2551  
CgCctGcgagtctGGtatGAAGTGCAGAAGTGATTCTAAAGTTCAAGAGACTTTAGAATCACTTCTGCACTGTTTTTTGct  
cgagctggcgaattcc  
>CD\_NM\_001006658.1:2008  
CgCctGcgagtctGGtatGCGTAGTCAGATTCGTTGCAAAGTTCAAGAGACTTTGCAACGAATCTGACTACTTTTTTTGct  
cgagctggcgaattcc  
>CD\_NM\_001006658.1:1622

CgCtGcgagtctGGtatGCAGGCACAATTCCTTGGTTTATTTCAAGAGAATAAACCAAGGAATTGTGCCTTTTTTTgct  
cgagctggcgaattcc  
>CD\_NM\_001006658.1:1495  
CgCtGcgagtctGGtatGATGGCAGCGTGTGAAGCTACAGTTCAAGAGACTGTAGCTTACACGCTGCCACTTTTTTgct  
cgagctggcgaattcc  
>CD\_NM\_001006658.1:753  
CgCtGcgagtctGGtatGCTTTCCCAATGGGAAGGTAAAGTTCAAGAGACTTTACCTTCCATTGGGAAATTTTTTgct  
cgagctggcgaattcc  
>CD\_NM\_001006658.1:2700  
CgCtGcgagtctGGtatGAATAGTGTATGTTGACTGCAATTTCAAGAGAATTGCAGTCAACATACACTATGTTTTTgct  
cgagctggcgaattcc  
>CD\_NM\_001006658.1:2265  
CgCtGcgagtctGGtatGAAGACAGAGTCTTCAAGAACTTTTCAAGAGAAAGTTCTTGAAGACTCTGTCTTTTTTgct  
cgagctggcgaattcc  
>CD\_NM\_001006658.1:733  
CgCtGcgagtctGGtatGAGCTGTAAATCTCTAGGACGATTTCAAGAGAATCGTCCTAGAGATTTACAGCGTTTTTgct  
cgagctggcgaattcc  
>CD\_NM\_001006658.1:3336  
CgCtGcgagtctGGtatGCGTATATTCTGTTGATCCATACTTCAAGAGAGTATGGATCAACAGAATATACTTTTTTgct  
cgagctggcgaattcc  
>CD\_NM\_001006658.1:2430  
CgCtGcgagtctGGtatGACCTCCACCAGTGATTGTCAATTTCAAGAGAATTGACAATCACTGGTGGAGGGTTTTTgct  
cgagctggcgaattcc  
>CD\_NM\_001006658.1:252  
CgCtGcgagtctGGtatGCACCTTCGCTCATTTGGAGAATTTCAAGAGATTTCTCCAATGAGGCGGAAGGTATTTTTTgct  
cgagctggcgaattcc  
>CD\_NM\_001006658.1:1959  
CgCtGcgagtctGGtatGAAATGACACTGTGACATTTCAAGTTCAAGAGACTTGAATGTCACAGTGTCAATTTTTTgct  
cgagctggcgaattcc  
>CD\_NM\_001771:103  
CgCtGcgagtctGGtatGCGGCTTTCTCTGACTCAAGTAATTTCAAGAGATTACTTGAGTCAGAGAAAGCCATTTTTTgct  
cgagctggcgaattcc  
>CD\_NM\_001771:1123  
CgCtGcgagtctGGtatGCGGCCAATCCTCTTCCAACAAATTTCAAGAGATTTGTTGGAAGAGGATTGGCCATTTTTTgct  
cgagctggcgaattcc  
>CD\_NM\_001771:1217  
CgCtGcgagtctGGtatGACCCTGGCACGCTGGGACTTATTTCAAGAGAATAAGTCCCAGCGTGCCAGGGTTTTTgct  
cgagctggcgaattcc  
>CD\_NM\_001771:1706  
CgCtGcgagtctGGtatGAGGGAAAGAAAGCCAGCTGAATTTCAAGAGAATTCAGCTGGCTTTCTTTCCCTTTTTTgct  
cgagctggcgaattcc  
>CD\_NM\_001771:2072  
CgCtGcgagtctGGtatGAAGCACCTTACTGTCTACTATTTCAAGAGAATAGTAGACAGTAAGGGTGCTGTTTTTgct  
cgagctggcgaattcc  
>CD\_NM\_001771:2350  
CgCtGcgagtctGGtatGCGCGCTTTCCCGAGATGAACATTTCAAGAGAATGTTTCATCTCGGGAAAGCGCATTTTTTgct  
cgagctggcgaattcc  
>CD\_NM\_001771.1:2572  
CgCtGcgagtctGGtatGCGTGGACTATGTGATCCTCAAATTTCAAGAGATTTGAGGATCACATAGTCCACATTTTTTgct  
cgagctggcgaattcc  
>CD\_NM\_001771.1:797  
CgCtGcgagtctGGtatGATCACTCCCAGTGATGCCATAGTTCAAGAGACTATGGCATCACTGGGAGTGACTTTTTTgct  
cgagctggcgaattcc  
>CD\_NM\_001771.1:751

CgCtGcgagtctGGtatGAACGGTGCAGCTGAACGTGAAGTTCAAGAGACTTACGTTTACGCTGCACCGTGTGTTTTGct  
cgagctggcgaattcc  
>CD\_NM\_001771.1:1624  
CgCtGcgagtctGGtatGATCGGTCAGCTCCAATGTGACTTCAAGAGAGTCACATTGGAGGCTGACCGAGTTTTGct  
cgagctggcgaattcc  
>CD\_NM\_001771.1:1975  
CgCtGcgagtctGGtatGAAGCCAGAAGCTGAGATTGGAGTTCAAGAGACTCCAATCTCAGCTTCTGGCTGTGTTTTGct  
cgagctggcgaattcc  
>CD\_NM\_001771.1:2239  
CgCtGcgagtctGGtatGAAGCTTCTTTGTGAGGAATAAATTCAAGAGATTTATTCCTCACAAAGAAGCTTTTTGct  
cgagctggcgaattcc  
>CD\_NM\_001771.1:1406  
CgCtGcgagtctGGtatGATTACCCGGTATGAATGGAACTTCAAGAGAGTTCCATTACATACCGGGTAACTTTTTGct  
cgagctggcgaattcc  
>CD\_NM\_001771.1:1123  
CgCtGcgagtctGGtatGAGCCAATCCTCTTCCAACAAATTTCAAGAGAATTTGTTGGAAGAGGATTGGCCTTTTTGct  
cgagctggcgaattcc  
>CD\_NM\_001771.1:2292  
CgCtGcgagtctGGtatGACCACTCCCTGGGATGCTACAATTTCAAGAGATTGTAGCATCCCAGGGAGTGGTTTTGct  
cgagctggcgaattcc  
>CD\_NM\_001771.1:2154  
CgCtGcgagtctGGtatGCCCTGGCAATCTGTGGGCTCAATTTCAAGAGATTGAGCCACAGATTGCCAGGATTTTTGct  
cgagctggcgaattcc  
>CD\_NM\_001771.1:2473  
CgCtGcgagtctGGtatGATATGAGAACGTCATTCCAGATTTCAAGAGAATCTGGAATGACGTTCTCATAGTTTTGct  
cgagctggcgaattcc  
>CD\_NM\_001771.1:1631  
CgCtGcgagtctGGtatGCGCCTCCAATGTGACTTCTCAATTTCAAGAGATTGAGAAGTCACATTGGAGGCTTTTTGct  
cgagctggcgaattcc  
>CD\_NM\_001771.1:105  
CgCtGcgagtctGGtatGATTTCTCTGACTCAAGTAAATGTTCAAGAGACATTTACTTGAGTCAGAGAAAGTTTTGct  
cgagctggcgaattcc  
>CD\_NM\_001771.1:2429  
CgCtGcgagtctGGtatGAACACGGTCACTTATTCAGCATTTCAAGAGAATGCTGAATAAGTGACCGTGTCTTTTTGct  
cgagctggcgaattcc  
>CD\_NM\_001771.1:1540  
CgCtGcgagtctGGtatGACCTGTCGCCCTGAATGTCCAGTTCAAGAGACTGGACATTCAGGGCGACAGGGTTTTGct  
cgagctggcgaattcc  
>CD\_NM\_001771.1:325  
CgCtGcgagtctGGtatGCAGGGTGCAATCCTGGGAGACTTCAAGAGAGTCTCCAGGAATTGCACCCTTTTTTGct  
cgagctggcgaattcc  
>CD\_NM\_001771.1:270  
CgCtGcgagtctGGtatGCTGGGACAAGACTCTATGAAAGTTCAAGAGACTTTCATAGAGTCTTGTCCATTTTTGct  
cgagctggcgaattcc  
>CD\_NM\_001771.1:1363  
CgCtGcgagtctGGtatGAACAGTGACCTTCTCTGTAACCTTCAAGAGAGTTACAGGAAAGGGTCACTGTGTTTTGct  
cgagctggcgaattcc  
>CD\_NM\_001771.1:257  
CgCtGcgagtctGGtatGCCCTCGAAGTTTGTGAGGACAATTTCAAGAGATTGTCCATCAAATTCGAGGTTTTTTGct  
cgagctggcgaattcc  
>CD\_NM\_001771.1:2382  
CgCtGcgagtctGGtatGAAGATGCAGAGTCTCAGAGATTTCAAGAGAATCTCTGAGGACTCTGCATCTTTTTGct  
cgagctggcgaattcc  
>CD\_NM\_001771.1:229

CgCctGcgagtctGGtatGATTCCACAATCCTGAGTATAACTTCAAGAGAGTTATACTCAGGATTGTGGAACTTTTTGct  
cgagctggcgaattcc  
>CD\_NM\_001771.1:101  
CgCctGcgagtctGGtatGCTGGCTTTCTCTGACTCAAGTATTCAAGAGATACTTGAGTCAGAGAAAGCCAATTTTTGct  
cgagctggcgaattcc  
>CD\_NM\_001771.1:2237  
CgCctGcgagtctGGtatGAAGAGCTTCTTTGTGAGGAATATTCAAGAGATATTCCTCACAAAGAAGCTCTGTTTTTGct  
cgagctggcgaattcc  
>CD\_NM\_001771.1:918  
CgCctGcgagtctGGtatGCGCAGAATACATTCACGCTAAATTCAAGAGATTTAGCGTGAATGTATTCTGCTTTTTTGct  
cgagctggcgaattcc  
>CD\_NM\_001771.1:455  
CgCctGcgagtctGGtatGATCAATGTCTCTGAAAGGCCTTTTCAAGAGAAAGGCCTTTCAGAGACATTGAGTTTTTGct  
cgagctggcgaattcc  
>CD\_NM\_001771.1:275  
CgCctGcgagtctGGtatGCCAAGACTCTATGAAAGCACAAATTCAAGAGATTGTGCTTTCATAGAGTCTTGTTTTTTGct  
cgagctggcgaattcc  
>CD\_NM\_001771.1:1934  
CgCctGcgagtctGGtatGCACACCTGGTTGACTGGAATATTCAAGAGATATTCAGTCAAACCAGGTGTATTTTTGct  
cgagctggcgaattcc  
>CD\_NM\_002002:402  
CgCctGcgagtctGGtatGCCGGTGACCAGATGGCGCAGAATTCAAGAGATTCTGCGCCATCTGGTCACCGTTTTTGct  
cgagctggcgaattcc  
>CD\_NM\_002002:465  
CgCctGcgagtctGGtatGAAGCTGAACAGCAGAGATTGAATTCAAGAGATTCAATCTCTGCTGTTACAGCTTTTTTGct  
cgagctggcgaattcc  
>CD\_NM\_002002:600  
CgCctGcgagtctGGtatGCCC GGGAGGAGGTGACAAAGCTTTCAAGAGAAGCTTTGTACCTCCTCCCGATTTTTGct  
cgagctggcgaattcc  
>CD\_NM\_002002:983  
CgCctGcgagtctGGtatGCACGACGCCCTTCTGCGACCGTATTCAAGAGATACGGTCGCAGAAGGCGTCGTTTTTGct  
cgagctggcgaattcc  
>CD\_NM\_002002:1065  
CgCctGcgagtctGGtatGACGCGGAGTCCATGGGACCTGATTCAAGAGATCAGGTCCCATGGACTCCCGGTTTTTGct  
cgagctggcgaattcc  
>CD\_NM\_002002.3:675  
CgCctGcgagtctGGtatGATGGATCAATTTCCAACGGAAGTTCAAGAGACTTCCGTTGGA AATTGATCCACTTTTTGct  
cgagctggcgaattcc  
>CD\_NM\_002002.3:294  
CgCctGcgagtctGGtatGAACTCTGCTTCTCCTGTGGCACTTCAAGAGAGTGCCACAGGAGAAGCAGAGTCTTTTTGct  
cgagctggcgaattcc  
>CD\_NM\_002002.3:1072  
CgCctGcgagtctGGtatGCCCATGGGACCTGATTCAAGACTTCAAGAGAGTCTTGAATCAGGTCCCATGGATTTTTGct  
cgagctggcgaattcc  
>CD\_NM\_002002.3:579  
CgCctGcgagtctGGtatGCTCAGATTTGCTGGA AAGACTTCAAGAGAGAGTCTTCCAGCAAATCTGAATTTTTGct  
cgagctggcgaattcc  
>CD\_NM\_002002.3:178  
CgCctGcgagtctGGtatGCTGGAGGAAGGTCAATATTCAAGACTTCAAGAGACTGAATATTGACCTTCTCCATTTTTGct  
cgagctggcgaattcc  
>CD\_NM\_002002.3:644  
CgCctGcgagtctGGtatGACGGCTTTGTGTGCAACACGTGTTCAAGAGACACGTGTTGCACACAAAGCCGTTTTGct  
cgagctggcgaattcc  
>CD\_NM\_002002.3:983

CgCctGcgagtctGGtatGCCGACGCCTTCTGCGACCGTAATTCAAGAGATTACGGTCGCAGAAGGCGTCGTTTTTTGct  
cgagctggcgaattcc  
>CD\_NM\_002002.3:441  
CgCctGcgagtctGGtatGCTCACAGGAAGTGGAGGAACCTTTCAAGAGAAAGTTCCCTCCAGTTCCCTGTGAATTTTTGct  
cgagctggcgaattcc  
>CD\_NM\_002002.3:747  
CgCctGcgagtctGGtatGATGTGACGACATGGAAGGGCAGTTCAAGAGACTGCCCTTCCATGTGTCACAGTTTTTGct  
cgagctggcgaattcc  
>CD\_NM\_002002.3:288  
CgCctGcgagtctGGtatGACTGCTGACTCTGCTTCTCCTGTTCAAGAGACAGGAGAAGCAGAGTCAGCAGCTTTTTGct  
cgagctggcgaattcc  
>CD\_NM\_002002.3:378  
CgCctGcgagtctGGtatGCTCCAAGAACTTGGAAAGCCACTTCAAGAGAGTGGCTTCCAAAGTTCTTGAATTTTTGct  
cgagctggcgaattcc  
>CD\_NM\_002002.3:430  
CgCctGcgagtctGGtatGCCACGCAGATTTACAGGAACCTTCAAGAGAGTTCCCTGTGAAATCTGCGTGGATTTTTGct  
cgagctggcgaattcc  
>CD\_NM\_002002.3:686  
CgCctGcgagtctGGtatGCCAACGGAAGTGCTACTACTTTTCAAGAGAAAGTAGTAGCACTTCCGTTGGATTTTTGct  
cgagctggcgaattcc  
>CD\_NM\_002002.3:497  
CgCctGcgagtctGGtatGCGGAGCTGTCTGGAACCTGAATTCAAGAGATTCCAGGTTCCAGGACAGCTCCATTTTTGct  
cgagctggcgaattcc  
>CD\_NM\_002002.3:831  
CgCctGcgagtctGGtatGATCCTGGATTGGCCTTCGGAACCTTCAAGAGAGTTCCGAAGGCCAATCCAGGAGTTTTGct  
cgagctggcgaattcc  
>CD\_NM\_002002.3:402  
CgCctGcgagtctGGtatGAGGTGACCAGATGGCGCAGAAATTTCAAGAGATTTCTGCGCCATCTGGTCACCGTTTTGct  
cgagctggcgaattcc  
>CD\_NM\_002002.3:843  
CgCctGcgagtctGGtatGACTTCGGAACCTGGACCTGAAGTTCAAGAGACTTCAGGTCCAAGTTCCGAAGTTTTGct  
cgagctggcgaattcc  
>CD\_NM\_002002.3:1065  
CgCctGcgagtctGGtatGAGCGGAGTCCATGGGACCTGATTTCAAGAGAATCAGGTCCCATGGACTCCGCGTTTTGct  
cgagctggcgaattcc  
>CD\_NM\_002002.3:764  
CgCctGcgagtctGGtatGAGCAGCTGGTCAGCATCCACAGTTCAAGAGACTGTGGATGCTGACCAGCTGCCTTTTTGct  
cgagctggcgaattcc  
>CD\_NM\_002002.3:359  
CgCctGcgagtctGGtatGACCGGAACGTCTCTCAAGTTTCTTCAAGAGAGAACTTGAGAGACGTTCCGGGTTTTGct  
cgagctggcgaattcc  
>CD\_NM\_002002.3:305  
CgCctGcgagtctGGtatGCCCTGTGGCACTGGGACACCACTTCAAGAGAGTGGTGTCCCAGTGCCACAGGATTTTTGct  
cgagctggcgaattcc  
>CD\_NM\_002002.3:1067  
CgCctGcgagtctGGtatGAGGAGTCCATGGGACCTGATTTCAAGAGAGAATCAGGTCCCATGGACTCCGTTTTGct  
cgagctggcgaattcc  
>CD\_NM\_002002.3:602  
CgCctGcgagtctGGtatGAGGAGGAGGTGACAAAGCTAAGTTCAAGAGACTTAGCTTTGTACCTCCTCCTTTTTGct  
cgagctggcgaattcc  
>CD\_NM\_002002.3:307  
CgCctGcgagtctGGtatGATGTGGCACTGGGACACCACACTTCAAGAGAGTGTGGTGTCCCAGTGCCACAGTTTTGct  
cgagctggcgaattcc  
>CD\_NM\_002002.3:635

CgCctGcgagtctGGtatGCGGTGTCCAGCGGCTTTGTGTGTTCAAGAGACACACAAAGCCGCTGGACACCTTTTTTGct  
cgagctggcgaattcc  
>CD\_NM\_002002.3:212  
CgCctGcgagtctGGtatGCTCCCAGGAGGCGGTGTTGCAGTTCAAGAGACTGCAACACCGCCTCCTGGGAATTTTTGct  
cgagctggcgaattcc  
>CD\_NM\_002002.3:471  
CgCctGcgagtctGGtatGCCAGCAGAGATTGAAATCTCAGTTCAAGAGACTGAGATTTCAATCTCTGCTGTTTTTTGct  
cgagctggcgaattcc  
>CD\_NM\_002002.3:600  
CgCctGcgagtctGGtatGACGGGAGGAGGTGACAAAGCTATTCAAGAGATAGCTTTGTACCTCCTCCCGTTTTTTGct  
cgagctggcgaattcc  
>CD\_NM\_013230.2:174  
CgCctGcgagtctGGtatGAGCAGATTTATTCAGTGAAACTTCAAGAGAGTTTCACTGGAATAAATCTGCGTTTTTTGct  
cgagctggcgaattcc  
>CD\_NM\_013230.2:331  
CgCctGcgagtctGGtatGCCTTCTGCATCTCTACTCTTAATTCAAGAGATTAAGAGTAGAGATGCAGAAGATTTTTGct  
cgagctggcgaattcc  
>CD\_NM\_013230.2:320  
CgCctGcgagtctGGtatGATCTCACTCTCTTCTGCATCTTCAAGAGAGATGCAGAAGAGAGAGTGAGACTTTTTGct  
cgagctggcgaattcc  
>CD\_NM\_013230.2:322  
CgCctGcgagtctGGtatGATCACTCTCTTCTGCATCTCTTCAAGAGAGAGATGCAGAAGAGAGAGTGAGTTTTTTGct  
cgagctggcgaattcc  
>CD\_NM\_013230.2:207  
CgCctGcgagtctGGtatGATTCAAGTAACTCTCCAGAGTTCAAGAGACTCTGGGAGGAGTTACTTGAAGTTTTTTGct  
cgagctggcgaattcc  
>CD\_NM\_013230.2:301  
CgCctGcgagtctGGtatGCACAGCCAGTCTCTTCGTGGTCTTCAAGAGAGACCACGAAGAGACTGGCTGTTTTTTGct  
cgagctggcgaattcc  
>CD\_NM\_013230.2:179  
CgCctGcgagtctGGtatGCTTTATTCCAGTGAAACAACAATTCAAGAGATTGTTGTTTCACTGGAATAAATTTTTGct  
cgagctggcgaattcc  
>CD\_NM\_013230.2:256  
CgCctGcgagtctGGtatGCCCAACTAATGCCACCACCAAGTTCAAGAGACTTGGTGGTGGCATTAGTTGGATTTTTGct  
cgagctggcgaattcc  
>CD\_NM\_013230.2:288  
CgCctGcgagtctGGtatGATGCCCTGCAGTCAACAGCCAGTTCAAGAGACTGGCTGTTGACTGCAGGGCACTTTTTGct  
cgagctggcgaattcc  
>CD\_NM\_013230.2:325  
CgCctGcgagtctGGtatGCCTCTCTTCTGCATCTCTACTTCAAGAGAGTAGAGATGCAGAAGAGAGAGTTTTTTGct  
cgagctggcgaattcc  
>CD\_NM\_013230.2:303  
CgCctGcgagtctGGtatGAAGCCAGTCTCTTCGTGGTCTCTTCAAGAGAGAGACCACGAAGAGACTGGCTGTTTTTTGct  
cgagctggcgaattcc  
>CD\_NM\_013230.2:307  
CgCctGcgagtctGGtatGAAGTCTCTTCGTGGTCTCACTCTTCAAGAGAGAGTGAGACCACGAAGAGACTGTTTTTTGct  
cgagctggcgaattcc  
>CD\_NM\_013230.2:170  
CgCctGcgagtctGGtatGACCACGCAGATTTATTCAGTGTTCAAGAGACACTGGAATAAATCTGCGTGGTTTTTTGct  
cgagctggcgaattcc  
>CD\_NM\_013230.2:309  
CgCctGcgagtctGGtatGATCTCTTCGTGGTCTCACTCTCTTCAAGAGAGAGAGTGAGACCACGAAGAGACTTTTTTTGct  
cgagctggcgaattcc  
>CD\_NM\_013230.2:305

CgCtGcgagtctGGtatGACCAGTCTCTTCGTGGTCTCACTTCAAGAGAGTGAGACCACGAAGAGACTGGCTTTTTGct  
cgagctggcgaattcc  
>CD\_NM\_013230.2:159  
CgCtGcgagtctGGtatGAACTGCTCCTACCCACGCAGATTTCAAGAGAATCTGCGTGGGTAGGAGCAGTGTGTTTTGct  
cgagctggcgaattcc  
>CD\_NM\_013230.2:191  
CgCtGcgagtctGGtatGAAAACAACAACCTGGAACCTCAATTCAAGAGATTGAAGTTCCAGTTGTTGTTCTTTTTGct  
cgagctggcgaattcc  
>CD\_NM\_013230.2:185  
CgCtGcgagtctGGtatGCCAGTGAAACAACAACCTGGAATTTCAAGAGATTCCAGTTGTTGTTTCACTGGATTTTTGct  
cgagctggcgaattcc  
>CD\_NM\_013230.2:294  
CgCtGcgagtctGGtatGCGCAGTCAACAGCCAGTCTCTTTTTCAAGAGAAAGAGACTGGCTGTTGACTGCATTTTTGct  
cgagctggcgaattcc  
>CD\_NM\_013230.2:168  
CgCtGcgagtctGGtatGCACCCACGCAGATTTATTCCAGTTCAAGAGACTGGAATAAATCTGCGTGGGTATTTTTGct  
cgagctggcgaattcc  
>CD\_NM\_013230.2:164  
CgCtGcgagtctGGtatGATCCTACCCACGCAGATTTATTTTTCAAGAGAAATAAATCTGCGTGGGTAGGAGTTTTGct  
cgagctggcgaattcc  
>CD\_NM\_013230.2:222  
CgCtGcgagtctGGtatGACCAGAGTACTTCCAACCTCTGGTTCAAGAGACCAGAGTTGGAAGTACTCTGGTTTTGct  
cgagctggcgaattcc  
>CD\_NM\_013230.2:162  
CgCtGcgagtctGGtatGCGCTCCTACCCACGCAGATTTATTCAAGAGATAAATCTGCGTGGGTAGGAGCATTTTTGct  
cgagctggcgaattcc  
>CD\_NM\_013230.2:176  
CgCtGcgagtctGGtatGAAGATTTATTCCAGTGAACAATTTCAAGAGATTGTTTCACTGGAATAAATCTGTTTTGct  
cgagctggcgaattcc  
>CD\_NM\_013230.2:316  
CgCtGcgagtctGGtatGAGTGGTCTCACTCTCTCTTCTGTTCAAGAGACAGAAGAGAGAGTGAGACCAGTTTTGct  
cgagctggcgaattcc  
>CD\_NM\_013230.2:153  
CgCtGcgagtctGGtatGCGTGGCACTGCTCCTACCCACTTCAAGAGAGTGGGTAGGAGCAGTGCCAGCATTTTTGct  
cgagctggcgaattcc  
>CD\_NM\_013230.2:255  
CgCtGcgagtctGGtatGCTCCAACCTAATGCCACCACCAATTTCAAGAGATTGGTGGTGGCATTAGTTGGATTTTTGct  
cgagctggcgaattcc  
>CD\_NM\_013230.2:163  
CgCtGcgagtctGGtatGACTCCTACCCACGCAGATTTATTTTTCAAGAGAATAAATCTGCGTGGGTAGGAGCTTTTTGct  
cgagctggcgaattcc  
>CD\_NM\_013230.2:196  
CgCtGcgagtctGGtatGCACAACCTGGAACCTCAAGTAACTTCAAGAGAGTTACTTGAAGTTCCAGTTGTTTTTTGct  
cgagctggcgaattcc  
>CD\_NM\_013230.2:173  
CgCtGcgagtctGGtatGCCGCAGATTTATTCCAGTGAATTTCAAGAGATTTCACTGGAATAAATCTGCGTTTTTTGct  
cgagctggcgaattcc  
>CD\_NM\_013230.2:172  
CgCtGcgagtctGGtatGAACGCAGATTTATTCCAGTGAATTTCAAGAGATTTCACTGGAATAAATCTGCGTTTTTTGct  
cgagctggcgaattcc  
>CD\_NM\_013230.2:318  
CgCtGcgagtctGGtatGCGGTCTCACTCTCTCTTCTGCAATTTCAAGAGATGCAGAAGAGAGAGTGAGACCATTTTTGct  
cgagctggcgaattcc  
>CD\_NM\_013230.2:192

CgCctGcgagtctGGtatGCAACAACAACCTGGAACCTCAAGTTCAAGAGACTTGAAGTTCCAGTTGTTGTTTTTTTTGct  
cgagctggcgaattcc  
>CD\_NM\_000417.1:726  
CgCctGcgagtctGGtatGCCAGTCAGTTCCAGGTGAAGTTCAAGAGACTTACCTGGAACTGACTGGTTTTTTTTGct  
cgagctggcgaattcc  
>CD\_NM\_000417.1:387  
CgCctGcgagtctGGtatGAACAACCAATGTCAATGCACAATTCAAGAGATTGTGCATTGACATTGGTTGTCTTTTTTGct  
cgagctggcgaattcc  
>CD\_NM\_000417.1:352  
CgCctGcgagtctGGtatGCGCTCTGTACAGGAACTCTAGTTCAAGAGACTAGAGTTTCTGTACAGAGCATTTTTTGct  
cgagctggcgaattcc  
>CD\_NM\_000417.1:346  
CgCctGcgagtctGGtatGCCTATATGCTCTGTACAGGAAATTCAGAGATTCTGTACAGAGCATATAGATTTTTGct  
cgagctggcgaattcc  
>CD\_NM\_000417.1:260  
CgCctGcgagtctGGtatGAACATTCAAAGCCATGGCCTACTTCAAGAGAGTAGGCCATGGCTTTGAATGTGTTTTTGct  
cgagctggcgaattcc  
>CD\_NM\_000417.1:563  
CgCctGcgagtctGGtatGAACAGAGAGAATTTATCATTCTTCAAGAGAGAAATGATAAATTCCTCTGTGTTTTTGct  
cgagctggcgaattcc  
>CD\_NM\_000417.1:474  
CgCctGcgagtctGGtatGCCACAGAAATGCAAAGTCCAATTCAAGAGATTGGACTTTGCATTTCTGTGGTTTTTTGct  
cgagctggcgaattcc  
>CD\_NM\_000417.1:949  
CgCctGcgagtctGGtatGAACAGAGGAAGAGTAGAAGAATTCAGAGAGTTCTTCTACTCTTCTCTGTCTTTTTTGct  
cgagctggcgaattcc  
>CD\_NM\_000417.1:784  
CgCctGcgagtctGGtatGATGAGACTTCTGCCTCGTCACTTCAAGAGAGTGACGAGGCAGGAAGTCTCACTTTTTTGct  
cgagctggcgaattcc  
>CD\_NM\_000417.1:408  
CgCctGcgagtctGGtatGCGCTCTGCCACTCGGAACACAATTCAAGAGATTGTGTTCCGAGTGGCAGAGCTTTTTTGct  
cgagctggcgaattcc  
>CD\_NM\_000417.1:375  
CgCctGcgagtctGGtatGAACTCGTCTGGGACAACCAATTTCAAGAGAATTGGTTGTCCCAGGACGAGTGTTTTTTGct  
cgagctggcgaattcc  
>CD\_NM\_000417.1:605  
CgCctGcgagtctGGtatGCTATCAGTGCCTCCAGGGATACTTCAAGAGAGTATCCCTGGACGCACTGATAATTTTTTGct  
cgagctggcgaattcc  
>CD\_NM\_000417.1:943  
CgCctGcgagtctGGtatGCGCGGAGACAGAGGAAGAGTAGTTCAAGAGACTACTTCTCTCTGTCTCCGCTTTTTTTGct  
cgagctggcgaattcc  
>CD\_NM\_000417.1:700  
CgCctGcgagtctGGtatGCGCTCATATGCACAGGTGAAATTTCAAGAGAATTTACCTGTGCATATGAGCTTTTTTGct  
cgagctggcgaattcc  
>CD\_NM\_000417.1:341  
CgCctGcgagtctGGtatGATCACTCTATATGCTCTGTACATTCAAGAGATGTACAGAGCATATAGAGTGACTTTTTTGct  
cgagctggcgaattcc  
>CD\_NM\_000417.1:866  
CgCctGcgagtctGGtatGCACAGAGTACCAGGTAGCAGTGTTCAGAGACACTGCTACCTGGTACTCTGTTTTTTTTGct  
cgagctggcgaattcc  
>CD\_NM\_000417.1:381  
CgCctGcgagtctGGtatGCCCTGGGACAACCAATGTCAATTTCAAGAGAATTGACATTGGTTGTCCCAGGATTTTTTGct  
cgagctggcgaattcc  
>CD\_NM\_000417.1:212



CgCctGcgagtctGGtatGATGCCAGGCAGAGCTCTGTGACTTCAAGAGAGTCACAGAGCTCTGCCTGGCAGTTTTTGct  
cgagctggcgaattcc  
>CD\_NM\_000417.1:847  
CgCctGcgagtctGGtatGCGGAGACGTCCATATTTACAACCTCAAGAGAGTTGTAAATATGGACGTCTCATTTTTTGct  
cgagctggcgaattcc  
>CD\_NM\_000417.1:312  
CgCctGcgagtctGGtatGCAGAGAGGTTTCCGCAGAATAATTC AAGAGATTATCTGCGGAAACCTCTCTTTTTTTGct  
cgagctggcgaattcc  
>CD\_NM\_000417.1:253  
CgCctGcgagtctGGtatGAACACGCCACATTC AAGCCATTTCAAGAGAATGGCTTTGAATGTGGCGTGTGTTTTTGct  
cgagctggcgaattcc  
>CD\_NM\_000417.1:730  
CgCctGcgagtctGGtatGATCAGTTTCCAGGTGAAGAGAATTC AAGAGATTCTCTTCACCTGGAAACTGACTTTTTGct  
cgagctggcgaattcc  
>CD\_NM\_000417.1:592  
CgCctGcgagtctGGtatGAGCAGATGGTTTATTATCAGTGTTC AAGAGACACTGATAATAAACCATCTGCCTTTTTGct  
cgagctggcgaattcc  
>CD\_NM\_000417.1:438  
CgCctGcgagtctGGtatGATGACACCTCAACCTGAAGAACCTCAAGAGAGTTCTTCAGGTTGAGGTGTCACTTTTTGct  
cgagctggcgaattcc  
>CD\_NM\_000417.1:225  
CgCctGcgagtctGGtatGATCTGTGACGATGACCCGCCAGTTCAAGAGACTGGCGGGTCATCGTCACAGAGTTTTTGct  
cgagctggcgaattcc  
>CD\_NM\_000417.1:737  
CgCctGcgagtctGGtatGCCCAGGTGAAGAGAAGCCTCAGTTCAAGAGACTGAGGCTTCTCTTCACCTGGATTTTTGct  
cgagctggcgaattcc  
>CD\_NM\_000417.1:644  
CgCctGcgagtctGGtatGCCCTGCTGAGAGCGTCTGCAAATTC AAGAGATTTGCAGACGCTCTCAGCAGGATTTTTGct  
cgagctggcgaattcc  
>CD\_NM\_000417.1:249  
CgCctGcgagtctGGtatGCTCCCACACGCCACATTC AAGTTCAAGAGACTTTGAATGTGGCGTGTGGGATTTTTTGct  
cgagctggcgaattcc  
>CD\_NM\_000417.1:404  
CgCctGcgagtctGGtatGAACAAGCTCTGCCACTCGGAACCTCAAGAGAGTTCCGAGTGGCAGAGCTTGTGTTTTTGct  
cgagctggcgaattcc  
>CD\_NM\_000417.1:227  
CgCctGcgagtctGGtatGATGTGACGATGACCCGCCAGAGTTCAAGAGACTCTGGCGGGTCATCGTCACAGTTTTTGct  
cgagctggcgaattcc  
>CD\_NM\_000417.1:765  
CgCctGcgagtctGGtatGACCGAAGGCCGTCTGAGAGTGTTC AAGAGACACTCTCAGGACGGCCTTCGGGTTTTTGct  
cgagctggcgaattcc  
>CD\_NM\_000417.1:287  
CgCctGcgagtctGGtatGCGGAACCATGTTGAACTGTGAATTC AAGAGATTCACAGTTCAACATGGTTCCTTTTTTGct  
cgagctggcgaattcc  
>CD\_NM\_000417.1:335  
CgCctGcgagtctGGtatGCAGCGGGTCACTCTATATGCTCTTC AAGAGAGAGCATATAGAGTGACCCGCTTTTTTTGct  
cgagctggcgaattcc  
>CD\_NM\_001935:629  
CgCctGcgagtctGGtatGCGCCCGTGGTTCTGCTGAACAATTC AAGAGATTGTTTCAGCAGAACCACGGGCATTTTTTGct  
cgagctggcgaattcc  
>CD\_NM\_001935:854  
CgCctGcgagtctGGtatGCTGGACATTCTATCAATGATTATTCAAGAGATAATCATTGATAGAATGTCCAATTTTTTGct  
cgagctggcgaattcc  
>CD\_NM\_001935:892

CgCctGcgagtctGGtatGAGGCAGTTTATTCCTTAGAATTTCAAGAGAATTCTAAGAGAATAAACTGCCCTTTTTGct  
cgagctggcgaattcc  
>CD\_NM\_001935:1838  
CgCctGcgagtctGGtatGAAGGAGGAAGGAATCTTTATAATTTCAAGAGATTATAAAGATTCCTTCTCCTGTTTTGct  
cgagctggcgaattcc  
>CD\_NM\_001935:2169  
CgCctGcgagtctGGtatGCTCCAAGAAATATCCTCTACTATTCAAGAGATAGTAGAGGATATTTCTTGATTTTTGct  
cgagctggcgaattcc  
>CD\_NM\_001935:2793  
CgCctGcgagtctGGtatGAAGCACAGCACACCAACATATATTCAAGAGATATATGTTGGTGTGCTGTGCTGTTTTGct  
cgagctggcgaattcc  
>CD\_NM\_001935.3:687  
CgCctGcgagtctGGtatGCACACTCTAACTGATTACTTAATTTCAAGAGATTAAGTAATCAGTTAGAGTGTATTTTTGct  
cgagctggcgaattcc  
>CD\_NM\_001935.3:854  
CgCctGcgagtctGGtatGCGGACATTCATCAATGATTATTTCAAGAGAATAATCATTGATAGAATGTCCATTTTTGct  
cgagctggcgaattcc  
>CD\_NM\_001935.3:2298  
CgCctGcgagtctGGtatGAGCAGAGGAAGTGGTTACCAAGTTCAAGAGACTTGGTAACCACTTCTCTGCCTTTTTGct  
cgagctggcgaattcc  
>CD\_NM\_001935.3:2651  
CgCctGcgagtctGGtatGCGTTGAGTACCTCCTTATTCATTTCAAGAGAATGAATAAGGAGGTACTCAACTTTTTGct  
cgagctggcgaattcc  
>CD\_NM\_001935.3:629  
CgCctGcgagtctGGtatGACCCGTGGTTCTGCTGAACAAATTTCAAGAGATTTGTTTCAGCAGAACCACGGGCTTTTGct  
cgagctggcgaattcc  
>CD\_NM\_001935.3:713  
CgCctGcgagtctGGtatGCACTTATAGACTGAAGTTATACTTTCAAGAGAGTATAACTTCAGTCTATAAGTATTTTTGct  
cgagctggcgaattcc  
>CD\_NM\_001935.3:1275  
CgCctGcgagtctGGtatGCCCTTCTACTCTGATGAGTCACTTTCAAGAGAGTGACTCATCAGAGTAGAAGGATTTTTGct  
cgagctggcgaattcc  
>CD\_NM\_001935.3:1927  
CgCctGcgagtctGGtatGCCTATTCTGTGTCATTCAGTAATTTCAAGAGATTACTGAATGACACAGAATAGTTTTGct  
cgagctggcgaattcc  
>CD\_NM\_001935.3:2224  
CgCctGcgagtctGGtatGAAGACACTGTCTTCAGACTGAATTTCAAGAGATTCAGTCTGAAGACAGTGTCTGTTTTGct  
cgagctggcgaattcc  
>CD\_NM\_001935.3:1452  
CgCctGcgagtctGGtatGAACTACTTGTGTGATGTGACATTTCAAGAGAATGTCACATCACACAAGTAGTTTTGct  
cgagctggcgaattcc  
>CD\_NM\_001935.3:2222  
CgCctGcgagtctGGtatGCGCAGACACTGCTTCAGACTGTTCAAGAGACAGTCTGAAGACAGTGTCTGCTTTTTGct  
cgagctggcgaattcc  
>CD\_NM\_001935.3:1158  
CgCctGcgagtctGGtatGAACTGGGTTTATGAAGAGGAAGTTCAAGAGACTTCTTCTTATAAACCAGTCTTTTTGct  
cgagctggcgaattcc  
>CD\_NM\_001935.3:2027  
CgCctGcgagtctGGtatGCGGGCTGAGAGTCTGGAAGACTTTCAAGAGAGTCTCCAGGACTCTCAGCCTTTTGct  
cgagctggcgaattcc  
>CD\_NM\_001935.3:2250  
CgCctGcgagtctGGtatGACCACTTACCTTGCAAGCACAGTTCAAGAGACTGTGCTTGAAGGTAAGTGGCTTTTTGct  
cgagctggcgaattcc  
>CD\_NM\_001935.3:940

CgCctGcgagtctGGtatGACTACACAGCTTCATATGACATTTCAAGAGAATGTCATATGAAGCTGTGTAGGTTTTTgct  
cgagctggcgaattcc  
>CD\_NM\_001935.3:834  
CgCctGcgagtctGGtatGCACAGTACATTTGATGAGTTTGTTC AAGAGACAAACTCATCAAATGTACTGTTTTTTGct  
cgagctggcgaattcc  
>CD\_NM\_001935.3:2605  
CgCctGcgagtctGGtatGCTTACAGAAATTC AACAGTCATTTCAAGAGAATGACTGTTGAATTTCTGTAATTTTTTgct  
cgagctggcgaattcc  
>CD\_NM\_001935.3:2172  
CgCctGcgagtctGGtatGCAGAAATATCCTCTACTATTAGTTCAAGAGACTAATAGTAGAGGATATTTCTTTTTTTGct  
cgagctggcgaattcc  
>CD\_NM\_001935.3:1705  
CgCctGcgagtctGGtatGAACACATTTGCTATTTCCAAATTTCAAGAGAATTTGGAAATAGCAAATGTGTCTTTTTGct  
cgagctggcgaattcc  
>CD\_NM\_001935.3:2738  
CgCctGcgagtctGGtatGCGGAGTGGATTTCCAGGCAATGTTCAAGAGACATTGCCTGGAAATCCACTCCATTTTTGct  
cgagctggcgaattcc  
>CD\_NM\_001935.3:892  
CgCctGcgagtctGGtatGAGCAGTTTATTCTCTTAGAATATTTCAAGAGATATTTCTAAGAGAATAAACTGCCTTTTTGct  
cgagctggcgaattcc  
>CD\_NM\_001935.3:1374  
CgCctGcgagtctGGtatGCATACAGACTCTCTCAGCTCAGTTCAAGAGACTGAGCTGAGAGAGTCTGTATTTTTTTGct  
cgagctggcgaattcc  
>CD\_NM\_001935.3:2839  
CgCctGcgagtctGGtatGCACAATGTTTCTCTTTACCTTATTCAAGAGATAAGGTAAAGAGAAACATTGTTTTTTGct  
cgagctggcgaattcc  
>CD\_NM\_001935.3:744  
CgCctGcgagtctGGtatGCGGATTT CAGATCATGAATATCTTCAAGAGAGATATTCATGATCTGAAATCCATTTTTGct  
cgagctggcgaattcc  
>CD\_NM\_001935.3:1931  
CgCctGcgagtctGGtatGCTCTGTGTCATTCAGTAAAGAGTTCAAGAGACTCTTTACTGAATGACACAGAATTTTTGct  
cgagctggcgaattcc  
>CD\_NM\_001935.3:1378  
CgCctGcgagtctGGtatGAAGACTCTCTCAGCTCAGTCACTTCAAGAGAGTGACTGAGCTGAGAGAGTCTGTTTTTgct  
cgagctggcgaattcc  
>CD\_NM\_001935.3:1483  
CgCctGcgagtctGGtatGCAGAAAGAATTTCTTTGCAGTGTTC AAGAGACACTGCAAAGAAATTTCTTTCTTTTTTTGct  
cgagctggcgaattcc  
>CD\_NM\_001242:284  
CgCctGcgagtctGGtatGAAGGCACTACTGGGCTCAGGGATTCAAGAGATCCCTGAGCCCAGTAGTGCCTCTTTTTGct  
cgagctggcgaattcc  
>CD\_NM\_001242:300  
CgCctGcgagtctGGtatGAAGGGAAAGCTGTGCTGCCAGATTCAAGAGATCTGGCAGCACAGCTTTCCCTGTTTTTgct  
cgagctggcgaattcc  
>CD\_NM\_001242:549  
CgCctGcgagtctGGtatGCCCAGTGTGATCCTCTTCCAATTTCAAGAGATTTGGAAGAGGATCACACTCGTTTTTTGct  
cgagctggcgaattcc  
>CD\_NM\_001242:825  
CgCctGcgagtctGGtatGCTCCTCCATCAACGAAGGAAATTTCAAGAGAATTTCTTCGTTGATGGAGGAATTTTTGct  
cgagctggcgaattcc  
>CD\_NM\_001242:876  
CgCctGcgagtctGGtatGAAGCCTGCAGAGCCTTGTCGTTTTTCAAGAGAAACGACAAGGCTCTGCAGGCTTTTTTgct  
cgagctggcgaattcc  
>CD\_NM\_001242:932

CgCctGcgagtctGGtatGACCCATCCAGGAGGATTACCGATTCAAGAGATCGGTAATCCTCCTGGATGGGGTTTTTGct  
cgagctggcgaattcc  
>CD\_NM\_001242:548  
CgCctGcgagtctGGtatGAACCGAGTGTGATCCTCTTCCATTCAAGAGATGGAAGAGGATCACACTCGGTGTTTTTGct  
cgagctggcgaattcc  
>CD\_NM\_001242:448  
CgCctGcgagtctGGtatGATCGGCACTGTAACCTCTGGTCTTTCAAGAGAAGACCAGAGTTACAGTGCCGACTTTTTTGct  
cgagctggcgaattcc  
>CD\_NM\_001242.3:545  
CgCctGcgagtctGGtatGCGCACCGAGTGTGATCCTCTTCTTCAAGAGAGAAGAGGATCACACTCGGTGCATTTTTTGct  
cgagctggcgaattcc  
>CD\_NM\_001242.3:460  
CgCctGcgagtctGGtatGATCTGGTCTTCTCGTTCGCAACTTCAAGAGAGTTGCGAACGAGAAGACCAGAGTTTTTGct  
cgagctggcgaattcc  
>CD\_NM\_001242.3:771  
CgCctGcgagtctGGtatGCCCTTGTGATCTTCTCTGGAATTTCAAGAGAATTCAGAGAAGATCACAAGGATTTTTTGct  
cgagctggcgaattcc  
>CD\_NM\_001242.3:628  
CgCctGcgagtctGGtatGATTACCTTATGTCAGTGAGATGTTCAAGAGACATCTCACTGACATAAGGTAAGTTTTTGct  
cgagctggcgaattcc  
>CD\_NM\_001242.3:675  
CgCctGcgagtctGGtatGCGCAGACTCTGGCTGACTTCAGTTCAAGAGACTGAAGTCAGCCAGAGTCTGCATTTTTTGct  
cgagctggcgaattcc  
>CD\_NM\_001242.3:499  
CgCctGcgagtctGGtatGCGCTGAGTGTGCCTGTGCAATTTCAAGAGAATGCGACAGGCACACTCAGCATTTTTTGct  
cgagctggcgaattcc  
>CD\_NM\_001242.3:488  
CgCctGcgagtctGGtatGCTCACTGCCAATGCTGAGTGTGTTCAAGAGACACACTCAGCATTGGCAGTGATTTTTTGct  
cgagctggcgaattcc  
>CD\_NM\_001242.3:484  
CgCctGcgagtctGGtatGAACCATCACTGCCAATGCTGAGTTCAAGAGACTCAGCATTGGCAGTGATGGTGTTTTTTGct  
cgagctggcgaattcc  
>CD\_NM\_001242.3:519  
CgCctGcgagtctGGtatGCTGGCTGGCAGTGCAGGGACAATTTCAAGAGATTGTCCCTGCACTGCCAGCCATTTTTTGct  
cgagctggcgaattcc  
>CD\_NM\_001242.3:706  
CgCctGcgagtctGGtatGCGCCCGGACTCTCTTACCCACTTCAAGAGAGTGGGTAGAGAGAGTCCGGGCATTTTTTGct  
cgagctggcgaattcc  
>CD\_NM\_001242.3:328  
CgCctGcgagtctGGtatGACCAGGAACATTCCTCGTGAAGTTCAAGAGACTTCACGAGGAATGTTCTTGGCTTTTTTGct  
cgagctggcgaattcc  
>CD\_NM\_001242.3:708  
CgCctGcgagtctGGtatGACCGGACTCTCTTACCCACTGTTCAAGAGACAGTGGGTAGAGAGAGTCCGGGTTTTTGct  
cgagctggcgaattcc  
>CD\_NM\_001242.3:592  
CgCctGcgagtctGGtatGATCTCAGGCCCTGAGCCCACACTTCAAGAGAGTGTGGGCTCAGGGCCTGAGACTTTTTTGct  
cgagctggcgaattcc  
>CD\_NM\_001242.3:774  
CgCctGcgagtctGGtatGCTGTGATCTTCTCTGGAATGTTTTCAAGAGAAACATTCAGAGAAGATCACAATTTTTTGct  
cgagctggcgaattcc  
>CD\_NM\_001242.3:471  
CgCctGcgagtctGGtatGCCGTTGCAACTGCACCATCACTTCAAGAGAGTGATGGTGCAGTTGCGAACGATTTTTTGct  
cgagctggcgaattcc  
>CD\_NM\_001242.3:679

CgCctGcgagtctGGtatGAACTCTGGCTGACTTCAGGCAGTTCAAGAGACTGCCTGAAGTCAGCCAGAGTCTTTTTGct  
cgagctggcgaattcc  
>CD\_NM\_001242.3:673  
CgCctGcgagtctGGtatGAATGCAGACTCTGGCTGACTTCTTCAAGAGAGAAGTCAGCCAGAGTCTGCATGTTTTGct  
cgagctggcgaattcc  
>CD\_NM\_001242.3:300  
CgCctGcgagtctGGtatGCGGAAAGCTGTGCTGCCAGATTTCAAGAGAATCTGGCAGCACAGCTTCCCTTTTTGct  
cgagctggcgaattcc  
>CD\_NM\_001242.3:284  
CgCctGcgagtctGGtatGCGGCACTACTGGGCTCAGGGAATTTCAAGAGATTCCTTGAGCCCAGTAGTGCCTTTTTGct  
cgagctggcgaattcc  
>CD\_NM\_001242.3:344  
CgCctGcgagtctGGtatGATGAAGGACTGTGACCAGCATATTTCAAGAGATATGCTGGTCACAGTCCTTCACTTTTTGct  
cgagctggcgaattcc  
>CD\_NM\_001242.3:362  
CgCctGcgagtctGGtatGAATAGAAAGGCTGCTCAGTGTGTTCAAGAGACACACTGAGCAGCCTTCTATGTTTTGct  
cgagctggcgaattcc  
>CD\_NM\_001242.3:623  
CgCctGcgagtctGGtatGCCCCACTTACCTTATGTGTCAGTGTTCAGGACACTGACATAAGGTAAGTGGTTTTTTGct  
cgagctggcgaattcc  
>CD\_NM\_001242.3:561  
CgCctGcgagtctGGtatGATCTTCCAAACCTTTCGCTGACTTCAAGAGAGTCAGCGAAGGGTTTGAAGAGTTTTGct  
cgagctggcgaattcc  
>CD\_NM\_001242.3:374  
CgCctGcgagtctGGtatGACTCAGTGTGATCCTTGCATACTTCAAGAGAGTATGCAAGGATCACACTGAGCTTTTTGct  
cgagctggcgaattcc  
>CD\_NM\_001242.3:664  
CgCctGcgagtctGGtatGCGCTGGGCACATGCAGACTCTGTTCAAGAGACAGAGTCTGCATGTGCCAGCTTTTTGct  
cgagctggcgaattcc  
>CD\_NM\_006139:468  
CgCctGcgagtctGGtatGAGGGTTCAACTGTGATGGGAAATTTCAAGAGATTTCCCATCACAGTTGAACCCCTTTTTGct  
cgagctggcgaattcc  
>CD\_NM\_006139:442  
CgCctGcgagtctGGtatGAAGCAGCTTCAGGTTTACTCAATTTCAAGAGATTGAGTAAACCTGAAGCTGCTGTTTTGct  
cgagctggcgaattcc  
>CD\_NM\_006139:539  
CgCctGcgagtctGGtatGCAACAGATATTTACTTCTGCAATTTCAAGAGATTGCAGAAGTAAATATCTGTTTTTTGct  
cgagctggcgaattcc  
>CD\_NM\_006139.1:515  
CgCctGcgagtctGGtatGACTCCAGAATTTGTATGTTAACTTCAAGAGAGTTAACATACAAATTTCTGGAGTTTTGct  
cgagctggcgaattcc  
>CD\_NM\_006139.1:519  
CgCctGcgagtctGGtatGAAGAATTTGTATGTTAACCAAATTTCAAGAGATTTGGTTAACATACAAATTTCTGTTTTGct  
cgagctggcgaattcc  
>CD\_NM\_006139.1:727  
CgCctGcgagtctGGtatGCAGTAACAGTGGCCTTTATTATTTCAAGAGAATAATAAAGGCCACTGTACTATTTTTGct  
cgagctggcgaattcc  
>CD\_NM\_006139.1:614  
CgCctGcgagtctGGtatGAATTATCCATGTGAAAGGGAAATTTCAAGAGATTTCCCTTTCACATGGATAATGTTTTGct  
cgagctggcgaattcc  
>CD\_NM\_006139.1:437  
CgCctGcgagtctGGtatGATCCCAGCAGCTTCAGGTTTACTTCAAGAGAGTAAACCTGAAGCTGCTGGGAGTTTTGct  
cgagctggcgaattcc  
>CD\_NM\_006139.1:587

CgCctGcgagtctGGtatGACTAGACAATGAGAAGAGCAATTTCAAGAGAATTGCTCTTCTCATTGTCTAGGTTTTTgct  
cgagctggcgaattcc  
>CD\_NM\_006139.1:408  
CgCctGcgagtctGGtatGATGGAAGTCTGTGTTGTATATGTTCAAGAGACATATAACAACACAGACTTCCACTTTTTGct  
cgagctggcgaattcc  
>CD\_NM\_006139.1:468  
CgCctGcgagtctGGtatGAGGTTCAACTGTGATGGGAAATTTCAAGAGAATTTCCCATCACAGTTGAACCCTTTTTGct  
cgagctggcgaattcc  
>CD\_NM\_006139.1:252  
CgCctGcgagtctGGtatGCTCCCTTCAATTCAAGTAACAGTTCAAGAGACTGTTACTTGAATTGAAGGGAATTTTTGct  
cgagctggcgaattcc  
>CD\_NM\_006139.1:506  
CgCctGcgagtctGGtatGAACATTCTACCTCCAGAATTTGTTCAAGAGACAAATTCTGGAGGTAGAATGTCTTTTGct  
cgagctggcgaattcc  
>CD\_NM\_006139.1:372  
CgCctGcgagtctGGtatGCTCCGGGCATCCCTTCACAAAGTTCAAGAGACTTTGTGAAGGGATGCCCGGAATTTTTGct  
cgagctggcgaattcc  
>CD\_NM\_006139.1:246  
CgCctGcgagtctGGtatGCACTTATCCCTTCAATTCAAGTTCAAGAGACTTGAATTGAAGGGAATAAGTTTTTTGct  
cgagctggcgaattcc  
>CD\_NM\_006139.1:608  
CgCctGcgagtctGGtatGCGGAACCATTATCCATGTGAAATTTCAAGAGATTTACATGGATAATGGTTCATTTTTGct  
cgagctggcgaattcc  
>CD\_NM\_006139.1:539  
CgCctGcgagtctGGtatGCACAGATATTTACTTCTGCAATTTCAAGAGATTTGCAGAAGTAAATATCTGTTTTTTGct  
cgagctggcgaattcc  
>CD\_NM\_006139.1:570  
CgCctGcgagtctGGtatGCTGTATCCTCCTCCTTACCTAGTTCAAGAGACTAGGTAAGGAGGAGGATACATTTTTGct  
cgagctggcgaattcc  
>CD\_NM\_006139.1:781  
CgCctGcgagtctGGtatGCGCACAGTGACTACATGAACATTTCAAGAGAATGTTTCATGTAGTCACTGTGCATTTTTGct  
cgagctggcgaattcc  
>CD\_NM\_006139.1:575  
CgCctGcgagtctGGtatGCCCTCCTCCTTACCTAGACAATTTCAAGAGAATTTGTCTAGGTAAGGAGGAGGATTTTTGct  
cgagctggcgaattcc  
>CD\_NM\_006139.1:323  
CgCctGcgagtctGGtatGCGCGGTCAACCTTAGCTGCAAGTTCAAGAGACTTGCAGCTAAGGTTGACCGCATTTTTGct  
cgagctggcgaattcc  
>CD\_NM\_006139.1:442  
CgCctGcgagtctGGtatGCGCAGCTTCAGGTTTACTCAAATTTCAAGAGATTTGAGTAAACCTGAAGCTGCTTTTTGct  
cgagctggcgaattcc  
>CD\_NM\_006139.1:231  
CgCctGcgagtctGGtatGATGCTCTTGCTCTCAACTTATTTCAAGAGAATAAGTTGAGAGCCAAGAGCAGTTTTGct  
cgagctggcgaattcc  
>CD\_NM\_006139.1:296  
CgCctGcgagtctGGtatGATCGCCCATGCTTGTAGCGTACTTCAAGAGAGTACGCTACAAGCATGGGCGACTTTTTGct  
cgagctggcgaattcc  
>CD\_NM\_006139.1:243  
CgCctGcgagtctGGtatGATCAACTTATCCCTTCAATTTCAAGAGAGAATTGAAGGGAATAAGTTGAGTTTTGct  
cgagctggcgaattcc  
>CD\_NM\_006139.1:412  
CgCctGcgagtctGGtatGCAGTCTGTGTTGTATATGGGAATTTCAAGAGATTTCCCATATAACAACACAGACTTTTTGct  
cgagctggcgaattcc  
>CD\_NM\_006139.1:514

CgCctGcgagtctGGtatGCCCTCCAGAATTTGTATGTAAATTC AAGAGATTAACATACAAATTTCTGGAGGTTTTTTGct  
cgagctggcgaattcc  
>CD\_NM\_006139.1:500  
CgCctGcgagtctGGtatGCTCAGTGACATTTCTACCTCCAGTTCAAGAGACTGGAGGTAGAATGTCACTGATTTTTTTGct  
cgagctggcgaattcc  
>CD\_NM\_006139.1:257  
CgCctGcgagtctGGtatGCTCAATTC AAGTAACAGGAACTTCAAGAGAGTTTCTGTACTTGAATTGAATTTTTTTGct  
cgagctggcgaattcc  
>CD\_NM\_006139.1:328  
CgCctGcgagtctGGtatGCCAACCTTAGCTGCAAGTATTCTTCAAGAGAGAATACTTGCAGCTAAGGTTGATTTTTTTGct  
cgagctggcgaattcc  
>CD\_NM\_006139.1:864  
CgCctGcgagtctGGtatGCTCGCAGCCTATCGCTCCTGACTTCAAGAGAGTCAGGAGCGATAGGCTGCGAATTTTTTTGct  
cgagctggcgaattcc  
>CD\_NM\_006139.1:404  
CgCctGcgagtctGGtatGCGCTGTGGAAGTCTGTGTTGTATTCAAGAGATACAACACAGACTTCCACAGCATTTTTTTGct  
cgagctggcgaattcc  
>CD\_NM\_006139.1:818  
CgCctGcgagtctGGtatGAGGGCCCACCCGCAAGCATTACTTCAAGAGAGTAATGCTTGC GGGTGGGCCCGTTTTTTGct  
cgagctggcgaattcc  
>CD\_NM\_002211:348  
CgCctGcgagtctGGtatGCTGCCCTCCAGATGACATAGAATTC AAGAGATTCATATGTCATCTGGAGGGCAATTTTTTTGct  
cgagctggcgaattcc  
>CD\_NM\_002211:505  
CgCctGcgagtctGGtatGAAGCCACAGACATTTACATTAATTC AAGAGATTAATGTAAATGTCTGTGGCTTTTTTTGct  
cgagctggcgaattcc  
>CD\_NM\_002211:1208  
CgCctGcgagtctGGtatGATGCAAATTTCTAGCAATGTAATTTCAAGAGAATTACATTGCTAGAAATTTGCAGTTTTTTGct  
cgagctggcgaattcc  
>CD\_NM\_002211:1284  
CgCctGcgagtctGGtatGAGGCCAAATTTGTCAGAAGGAGTATTCAAGAGATACTCCTTCTGACAATTTGCCGTTTTTTGct  
cgagctggcgaattcc  
>CD\_NM\_002211:1773  
CgCctGcgagtctGGtatGCGGCCAAATTTCTGCGAGTGTGATTTCAAGAGAATCACACTCGCAGAATTTGCCATTTTTTTGct  
cgagctggcgaattcc  
>CD\_NM\_002211:2406  
CgCctGcgagtctGGtatGCAGGGAGTTTGCTAAATTTGAATTC AAGAGATTC A AATTTAGCAA ACTCCCTTTTTTTGct  
cgagctggcgaattcc  
>CD\_NM\_002211:1151  
CgCctGcgagtctGGtatGCGCCTGTTTACAAGGAGCTGAATTC AAGAGATTCAGCTCCTTG TAAACAGGCTTTTTTTGct  
cgagctggcgaattcc  
>CD\_NM\_002211.2:1506  
CgCctGcgagtctGGtatGCTCTGTGAATGTGAATGCCAAATTC AAGAGATTTGGCATTACATTCACAGATTTTTTTGct  
cgagctggcgaattcc  
>CD\_NM\_002211.2:306  
CgCctGcgagtctGGtatGCCTGCACGATGTGATGATTTAGTTCAAGAGACTAAATCATCACATCGTGCAGATTTTTTTGct  
cgagctggcgaattcc  
>CD\_NM\_002211.2:370  
CgCctGcgagtctGGtatGCTCCCAGAGGCTCCAAAGATATTTCAAGAGAATATCTTTGGAGCCTCTGGGATTTTTTTGct  
cgagctggcgaattcc  
>CD\_NM\_002211.2:1787  
CgCctGcgagtctGGtatGATGTGATAATTTCAACTGTGATTTCAAGAGAATCACAGTTGAAATTATCACACTTTTTTTGct  
cgagctggcgaattcc  
>CD\_NM\_002211.2:171

CgCctGcgagtctGGtatGCGCTGTGTGTTTGTCAAACAGTTCAAGAGACTGTTTGAGCAAACACACAGCATTTTTTGct  
cgagctggcgaattcc  
>CD\_NM\_002211.2:431  
CgCctGcgagtctGGtatGCGCAGAGAAGCTCAAGCCAGAGTTCAAGAGACTCTGGCTTGAGCTTCTCTGCTTTTTTTGct  
cgagctggcgaattcc  
>CD\_NM\_002211.2:1634  
CgCctGcgagtctGGtatGAACAGATGAAGTTAACAGTGAATTC AAGAGATTCAC TGT TAACTTCATCTGTGTTTTTTGct  
cgagctggcgaattcc  
>CD\_NM\_002211.2:1726  
CgCctGcgagtctGGtatGAACAGTGTGTTTGTAGGAAGAGTTCAAGAGACTCTTCCTACAAACACACTGTCTTTTTTGct  
cgagctggcgaattcc  
>CD\_NM\_002211.2:1385  
CgCctGcgagtctGGtatGCGGAGATGAGGTTCAATTTGAATTC AAGAGATTC A AATTGAACCTCATCTCCATTTTTTGct  
cgagctggcgaattcc  
>CD\_NM\_002211.2:1724  
CgCctGcgagtctGGtatGAGGACAGTGTGTTTGTAGGAAGTTCAAGAGACTTCCTACAAACACACTGTCCGTTTTTTGct  
cgagctggcgaattcc  
>CD\_NM\_002211.2:2234  
CgCctGcgagtctGGtatGCACGTATTCAGTGAATGGGAAC TTCAAGAGAGTTCCCATTCACTGAATACGTATTTTTTGct  
cgagctggcgaattcc  
>CD\_NM\_002211.2:1816  
CgCctGcgagtctGGtatGCTGGCTTAATTTGTGGAGGAAATTC AAGAGATTTCCCTCCACAAATTAAGCCATTTTTTTGct  
cgagctggcgaattcc  
>CD\_NM\_002211.2:2240  
CgCctGcgagtctGGtatGCTCAGTGAATGGGAACAACGAGTTCAAGAGACTCGTTGTTCCCATTCACTGAATTTTTTGct  
cgagctggcgaattcc  
>CD\_NM\_002211.2:788  
CgCctGcgagtctGGtatGCGTGCTCAGTCTTACTAATAAATTC AAGAGATTTATTAGTAAGACTGAGCACATTTTTTGct  
cgagctggcgaattcc  
>CD\_NM\_002211.2:1290  
CgCctGcgagtctGGtatGCTGT CAGAAGGAGTAACAATAATTC AAGAGATTATTGTTACTCCTTCTGACAATTTTTTGct  
cgagctggcgaattcc  
>CD\_NM\_002211.2:1017  
CgCctGcgagtctGGtatGAATGGACAATGTCACCTGGAAATTC AAGAGATTTCCAGGTGACATTGTCCATCTTTTTTGct  
cgagctggcgaattcc  
>CD\_NM\_002211.2:2065  
CgCctGcgagtctGGtatGCTCAGTGCAGAGCCTTCAATAATTC AAGAGATTATTGAAGGCTCTGCACTGAATTTTTTGct  
cgagctggcgaattcc  
>CD\_NM\_002211.2:1884  
CgCctGcgagtctGGtatGAGCAGTGCATGTGACTGTTCTTTTTCAAGAGAAAGAACAGTCACATGCACTGCCTTTTTTGct  
cgagctggcgaattcc  
>CD\_NM\_002211.2:348  
CgCctGcgagtctGGtatGCGCCCTCCAGATGACATAGAAATTC AAGAGATTTCTATGT CATCTGGAGGGC ATTTTTTGct  
cgagctggcgaattcc  
>CD\_NM\_002211.2:1053  
CgCctGcgagtctGGtatGCTGAGCCATTATTATGATTATCTTCAAGAGAGATAATCATAATAATGGCTCATTTTTTTGct  
cgagctggcgaattcc  
>CD\_NM\_002211.2:2264  
CgCctGcgagtctGGtatGAATGGTTCATGTTGTGGAGAATTTCAAGAGAATTC TCCACAACATGAACCATGTTTTTTGct  
cgagctggcgaattcc  
>CD\_NM\_002211.2:1197  
CgCctGcgagtctGGtatGAGAACATTATCTGCAAATTTCTATTCAAGAGATAGAATTTGCAGATAATGTTCTTTTTTGct  
cgagctggcgaattcc  
>CD\_NM\_002211.2:623



CgCctGcgagtctGGtatGCACAGATCTGATGAATGAAATGTTCAAGAGACATTTTCATTCATCAGATCTGTTTTTTTGct  
cgagctggcgaattcc  
>CD\_NM\_002211.2:864  
CgCctGcgagtctGGtatGCCTCCAGAAGGTGGTTTTGCATGTTCAAGAGACATCGAAACCACCTTCTGGAGATTTTTTGct  
cgagctggcgaattcc  
>CD\_NM\_002211.2:2034  
CgCctGcgagtctGGtatGATTGGTGTCTGTGCTGAGCATATTTCAAGAGATATGCTCAGCACAGACACCAAGTTTTTGct  
cgagctggcgaattcc  
>CD\_NM\_002211.2:1961  
CgCctGcgagtctGGtatGATGCGAGTGTGGTGTCTGTAAGTTCAAGAGACTTACAGACACCACACTCGCAGTTTTTGct  
cgagctggcgaattcc  
>CD\_NM\_001243:1591  
CgCctGcgagtctGGtatGATCGCGAAGAGCGAGGGTTAATTCAAGAGATTAACCCTCGCTCTTCCGCGACTTTTTTGct  
cgagctggcgaattcc  
>CD\_NM\_001243:1984  
CgCctGcgagtctGGtatGCTGCCACAGCTGCCTCTGGAATTCAAGAGATTCAGAGGCAGCTGTGGGCAATTTTTTGct  
cgagctggcgaattcc  
>CD\_NM\_001243.3:822  
CgCctGcgagtctGGtatGACCCAGGAAGCTGCTTCTAAACTTCAAGAGAGTTTAGAAGCAGCTTCTGGGCTTTTTTGct  
cgagctggcgaattcc  
>CD\_NM\_001243.3:485  
CgCctGcgagtctGGtatGCCGAGACGACCTCGTGGAGAAGTTCAAGAGACTTCTCCACGAGGTCGTCTCGATTTTTTGct  
cgagctggcgaattcc  
>CD\_NM\_001243.3:1010  
CgCctGcgagtctGGtatGCCGAGATGACCTTGTGGAGAAGTTCAAGAGACTTCTCCACAAGGTCATCTCGATTTTTTGct  
cgagctggcgaattcc  
>CD\_NM\_001243.3:1271  
CgCctGcgagtctGGtatGAACTCAGAGCTTGTGGTGGACTTCAAGAGAGTCCACCAGCAAGCTCTGAGTGTTTTTGct  
cgagctggcgaattcc  
>CD\_NM\_001243.3:1748  
CgCctGcgagtctGGtatGAACCAATAACAAGATTGAGAAATTTCAAGAGATTTCTCAATCTTGTATTGGTGTTTTTGct  
cgagctggcgaattcc  
>CD\_NM\_001243.3:547  
CgCctGcgagtctGGtatGAACCCGGCATGTTCTGTTCCACTTCAAGAGAGTGAACAGAACATGCCGGGTCTTTTTTGct  
cgagctggcgaattcc  
>CD\_NM\_001243.3:1952  
CgCctGcgagtctGGtatGATCAGTGAAGAGGAAGGGAAATTTCAAGAGATTTCCCTTCTTCCACTGAGTTTTTGct  
cgagctggcgaattcc  
>CD\_NM\_001243.3:431  
CgCctGcgagtctGGtatGACCTGACTACTACCTGGATGAGTTCAAGAGACTCATCCAGGTAGTAGTCAGGCTTTTTTGct  
cgagctggcgaattcc  
>CD\_NM\_001243.3:1739  
CgCctGcgagtctGGtatGAACGGAGCACACCAATAACAAGTTCAAGAGACTTGTATTGGTGTGCTCCGTGTTTTTGct  
cgagctggcgaattcc  
>CD\_NM\_001243.3:1984  
CgCctGcgagtctGGtatGCGCCCACAGCTGCCTCTGGAATTTCAAGAGATTTCCAGAGGCAGCTGTGGGCATTTTTTGct  
cgagctggcgaattcc  
>CD\_NM\_001243.3:865  
CgCctGcgagtctGGtatGACTCCTCTGTGGGAAGGCCTAGTTCAAGAGACTAGGCCTTCCACAGAGGAGTTTTTGct  
cgagctggcgaattcc  
>CD\_NM\_001243.3:1375  
CgCctGcgagtctGGtatGAGCCAGTGCTTCTTGGGTGATTTCAAGAGAATCACCCAGAAGAGCACTGGCCTTTTTTGct  
cgagctggcgaattcc  
>CD\_NM\_001243.3:638

CgCctGcgagtctGGtatGACCAGGCACGGCGCAGAAGAACTTCAAGAGAGTTCTTCTGCGCCGTGCTGGGTTTTTGct  
cgagctggcgaattcc  
>CD\_NM\_001243.3:1075  
CgCctGcgagtctGGtatGATGGCATGATCTGTGCCACATCTTCAAGAGAGATGTGGCACAGATCATGCCAGTTTTTGct  
cgagctggcgaattcc  
>CD\_NM\_001243.3:522  
CgCctGcgagtctGGtatGCACTCCTCCCGTGTCTGCGAATTTCAAGAGAATTCGCAGACACGGGAGGAGTTTTTTTGct  
cgagctggcgaattcc  
>CD\_NM\_001243.3:457  
CgCctGcgagtctGGtatGCCCCTGTACAGCCTGCGTGACTTCAAGAGAGTACGCAGGCTGTACAGCGTTTTTTTGct  
cgagctggcgaattcc  
>CD\_NM\_001243.3:1946  
CgCctGcgagtctGGtatGAATGCTCTCAGTGAAGAGGAATTCAGAGATTCCTCTTCCACTGAGAGCATGTTTTTGct  
cgagctggcgaattcc  
>CD\_NM\_001243.3:1039  
CgCctGcgagtctGGtatGATGCATGGAACCTCCCGCACTTCAAGAGAGTGGGGAGGAGTCCATGCACTTTTTGct  
cgagctggcgaattcc  
>CD\_NM\_001243.3:1578  
CgCctGcgagtctGGtatGATGACAGAACCCGTGCGGAAGTTCAAGAGACTTCCGCGACGGGTCTGTCACTTTTTTGct  
cgagctggcgaattcc  
>CD\_NM\_001243.3:1424  
CgCctGcgagtctGGtatGAAGCGCCTTCTCCTGTGCCACTTCAAGAGAGTGGCACAGGAGGAAGGCGTGTTTTTTGct  
cgagctggcgaattcc  
>CD\_NM\_001243.3:1621  
CgCctGcgagtctGGtatGAACTGATGGAGACCTGCCACAGTTCAAGAGACTGTGGCAGGTCTCCATCAGTGTTTTTTGct  
cgagctggcgaattcc  
>CD\_NM\_001243.3:1989  
CgCctGcgagtctGGtatGCCAGCTGCCTCTGGAAAGTGAGTTCAAGAGACTCACTTTCAGAGGCAGCTGTTTTTTGct  
cgagctggcgaattcc  
>CD\_NM\_001243.3:614  
CgCctGcgagtctGGtatGCCCAGGATGATTGTCAAGTTCAAGAGACTTGACAATCATCCCTGCCGATTTTTTGct  
cgagctggcgaattcc  
>CD\_NM\_001243.3:550  
CgCctGcgagtctGGtatGACGGCATGTTCTGTTCCACGTCTTCAAGAGAGACGTGGAACAGAACATGCCGTTTTTTGct  
cgagctggcgaattcc  
>CD\_NM\_001243.3:826  
CgCctGcgagtctGGtatGCGGAAGCTGCTTCTAAACTGACTTCAAGAGAGTCAGTTTAGAAGCAGCTTCTTTTTTTGct  
cgagctggcgaattcc  
>CD\_NM\_001243.3:1429  
CgCctGcgagtctGGtatGACTTCTCCTGTGCCACCGGAGTTCAAGAGACTCCGGTGGCACAGGAGGAAGTTTTTTGct  
cgagctggcgaattcc  
>CD\_NM\_001243.3:1288  
CgCctGcgagtctGGtatGCGGACTCCCAGGCCAGTAAGACTTCAAGAGAGTCTTACTGGCCTGGGAGTCCATTTTTTGct  
cgagctggcgaattcc  
>CD\_NM\_001243.3:239  
CgCctGcgagtctGGtatGAGCGCTGGGACTGCTGTTCTGTTCAAGAGACAGGAACAGCAGTCCCAGCGTTTTTTGct  
cgagctggcgaattcc  
>CD\_NM\_001243.3:858  
CgCctGcgagtctGGtatGAACTCTCCCTCCTCTGTGGGAATTCAGAGATTCACACAGAGGAGGGAGAGTCTTTTTTGct  
cgagctggcgaattcc  
>CD\_NM\_001243.3:1282  
CgCctGcgagtctGGtatGCGCTGGTGGACTCCCAGGCCAGTTCAAGAGACTGGCCTGGGAGTCCACCAGCATTTTTTGct  
cgagctggcgaattcc  
>CD\_NM\_001243.3:1649

CgCctGcgagtctGGtatGAGCAGCCTACCTGGAGAGCCTGTTCAAGAGACAGGCTCTCCAGGTAGGCTGCCTTTTTTGct  
cgagctggcgaattcc  
>CD\_NM\_021642:961  
CgCctGcgagtctGGtatGACAACGACCATGTCAACAGTAATTTCAAGAGATTACTGTTGACATGGTCGTTGGTTTTTGct  
cgagctggcgaattcc  
>CD\_NM\_004001:373  
CgCctGcgagtctGGtatGCCCTGTGCATCTGACTGTGCTTTCAAGAGAAGCACAGTCAGATGCACAGGGTTTTTTTGct  
cgagctggcgaattcc  
>CD\_NM\_004001:741  
CgCctGcgagtctGGtatGATGGCCTTGATCTACTGCAGGATTCAAGAGATCCTGCAGTAGATCAAGGCCACTTTTTTGct  
cgagctggcgaattcc  
>CD\_NM\_021642:914  
CgCctGcgagtctGGtatGAAGGGCACCTACTGACGATGATTTCAAGAGAATCATCGTCAGTAGGTGCCCTGTTTTTGct  
cgagctggcgaattcc  
>CD\_NM\_021642.2:202  
CgCctGcgagtctGGtatGATCTGTGACTCTGACATGCCAGTTCAAGAGACTGGCATGTCAGAGTCACAGAGTTTTTGct  
cgagctggcgaattcc  
>CD\_NM\_021642.2:961  
CgCctGcgagtctGGtatGAAACGACCATGTCAACAGTAATTTCAAGAGAATTACTGTTGACATGGTCGTTGTTTTTGct  
cgagctggcgaattcc  
>CD\_NM\_021642.2:916  
CgCctGcgagtctGGtatGAGCACCTACTGACGATGATAAATTTCAAGAGATTTATCATCGTCAGTAGGTGCCTTTTTTGct  
cgagctggcgaattcc  
>CD\_NM\_021642.2:246  
CgCctGcgagtctGGtatGCCTCCATTCAGTGGTTCCACAATTTCAAGAGATTGTGGAACCACTGAATGGAGTTTTTTTGct  
cgagctggcgaattcc  
>CD\_NM\_021642.2:50  
CgCctGcgagtctGGtatGCCCCAAATGTCTCAGAATGTATTTCAAGAGAATACATTCTGAGACATTTGGGTTTTTTTGct  
cgagctggcgaattcc  
>CD\_NM\_021642.2:148  
CgCctGcgagtctGGtatGACCAAAGGCTGTGCTGAAACTTTTTCAAGAGAAAGTTTCAGCACAGCCTTTGGGTTTTTTTGct  
cgagctggcgaattcc  
>CD\_NM\_021642.2:820  
CgCctGcgagtctGGtatGCGGACGTCAAATGATTGCCATCTTCAAGAGAGATGGCAATCATTTGACGTCCATTTTTTGct  
cgagctggcgaattcc  
>CD\_NM\_021642.2:521  
CgCctGcgagtctGGtatGAAGAAATTCCTCCATTTGGATCTTCAAGAGAGATCCAAATGGGAGAATTTCTGTTTTTTGct  
cgagctggcgaattcc  
>CD\_NM\_021642.2:825  
CgCctGcgagtctGGtatGATCAAATGATTGCCATCAGAAATTTCAAGAGATTTCTGATGGCAATCATTTGACTTTTTTGct  
cgagctggcgaattcc  
>CD\_NM\_021642.2:379  
CgCctGcgagtctGGtatGACATCTGACTGTGCTTTCCGAATTTCAAGAGATTCGAAAGCACAGTCAGATGCTTTTTTGct  
cgagctggcgaattcc  
>CD\_NM\_021642.2:889  
CgCctGcgagtctGGtatGAGGCGGCTACATGACTCTGAACTTTCAAGAGAGTTCAGAGTCATGTAGCCCGCTTTTTTGct  
cgagctggcgaattcc  
>CD\_NM\_021642.2:373  
CgCctGcgagtctGGtatGACCTGTGCATCTGACTGTGCTTTTCAAGAGAAAGCACAGTCAGATGCACAGGGTTTTTTTGct  
cgagctggcgaattcc  
>CD\_NM\_021642.2:259  
CgCctGcgagtctGGtatGATTCCACAATGGGAATCTCATTTTTCAAGAGAAATGAGATTTCCATTGTGGAACTTTTTTGct  
cgagctggcgaattcc  
>CD\_NM\_021642.2:494

CgCctGcgagtctGGtatGATCACATTCTTCCAGAATGGAATTCAAGAGATTCCATTCTGGAAGAATGTGACTTTTTTGct  
cgagctggcgaattcc  
>CD\_NM\_021642.2:609  
CgCctGcgagtctGGtatGACTACACGCTGTTCTCATCCAATTCAAGAGATTGGATGAGAACAGCGTGTAGCTTTTTTGct  
cgagctggcgaattcc  
>CD\_NM\_021642.2:741  
CgCctGcgagtctGGtatGCGGCCTTGATCTACTGCAGGAATTCAAGAGATTCCCTGCAGTAGATCAAGGCCATTTTTTGct  
cgagctggcgaattcc  
>CD\_NM\_021642.2:178  
CgCctGcgagtctGGtatGATGGATCAACGTGCTCCAGGAGTTCAAGAGACTCCTGGAGCACGTTGATCCACTTTTTTGct  
cgagctggcgaattcc  
>CD\_NM\_021642.2:701  
CgCctGcgagtctGGtatGATCATTGCGACTGCTGTAGCAGTTCAAGAGACTGCTACAGCAGTCGCAATGACTTTTTTGct  
cgagctggcgaattcc  
>CD\_NM\_021642.2:546  
CgCctGcgagtctGGtatGACTTCTCCATCCCACAAGCAAATTCAAGAGATTTGCTTGTGGGATGGAGAAGTTTTTGct  
cgagctggcgaattcc  
>CD\_NM\_021642.2:955  
CgCctGcgagtctGGtatGCCCTCCCAACGACCATGTCAACTTCAAGAGAGTTGACATGGTCGTTGGGAGATTTTTTGct  
cgagctggcgaattcc  
>CD\_NM\_021642.2:237  
CgCctGcgagtctGGtatGATGAGAGCGACTCCATTCAAGTGTTCAGAGACTGAATGGAGTCGCTCTCAGTTTTTGct  
cgagctggcgaattcc  
>CD\_NM\_021642.2:866  
CgCctGcgagtctGGtatGCACAATGACTATGAAACAGCTGTTCAAGAGACAGCTGTTTCATAGTCATTGTTTTTTTTGct  
cgagctggcgaattcc  
>CD\_NM\_021642.2:517  
CgCctGcgagtctGGtatGCTCCCAGAAATTCCTCCATTTGTTCAAGAGACAAATGGGAGAATTTCTGGGATTTTTTGct  
cgagctggcgaattcc  
>CD\_NM\_021642.2:60  
CgCctGcgagtctGGtatGATCAGAATGTATGTCCAGAAATTCAGAGATTTCTGGGACATACATTCTGAGTTTTTGct  
cgagctggcgaattcc  
>CD\_NM\_021642.2:298  
CgCctGcgagtctGGtatGAAGCTACAGTTCAAGGCCAACTTCAAGAGAGTTGGCCTTGAACCTGTAGCTGTTTTTGct  
cgagctggcgaattcc  
>CD\_NM\_021642.2:631  
CgCctGcgagtctGGtatGACCTGTGACCATCACTGTCCAATTCAAGAGATTGGACAGTGATGGTCACAGGCTTTTTTGct  
cgagctggcgaattcc  
>CD\_NM\_021642.2:381  
CgCctGcgagtctGGtatGCTCTGACTGTGCTTTCCGAATGTTCAAGAGACATTCGAAAGCACAGTCAGATTTTTTGct  
cgagctggcgaattcc  
>CD\_NM\_021642.2:654  
CgCctGcgagtctGGtatGCGCCCAGCATGGGCAGCTCTTCTTCAAGAGAGAAGAGCTGCCCATGCTGGGCATTTTTTGct  
cgagctggcgaattcc  
>CD\_NM\_021642.2:643  
CgCctGcgagtctGGtatGAACTGTCCAAGTGCCAGCATGTTCAAGAGACATGCTGGGCACTTGGACAGTGTTTTTTGct  
cgagctggcgaattcc  
>CD\_NM\_001772:50  
CgCctGcgagtctGGtatGAGGCCCTGGCTATGGATCCAATTCAAGAGATTTGGATCCATAGCCAGGGCCCTTTTTTGct  
cgagctggcgaattcc  
>CD\_NM\_001772:343  
CgCctGcgagtctGGtatGCGGGATAATGGTTCATACTTCTTTTCAAGAGAAGAAGTATGAACCATTATCCCTTTTTTGct  
cgagctggcgaattcc  
>CD\_NM\_001772:838

CgCctGcgagtctGGtatGCGCCTCATCTTCTTCATAGTGATTCAAGAGATCACTATGAAGAAGATGAGGCATTTTTGct  
cgagctggcgaattcc  
>CD\_NM\_001772:1021  
CgCctGcgagtctGGtatGAAGCTGCATTATGCTTCCCTCATTTCAAGAGATGAGGGAAGCATAATGCAGCTCTTTTTGct  
cgagctggcgaattcc  
>CD\_NM\_001772.2:838  
CgCctGcgagtctGGtatGACCTCATCTTCTTCATAGTGAATTCAAGAGATTCACATATGAAGAAGATGAGGCTTTTTGct  
cgagctggcgaattcc  
>CD\_NM\_001772.2:132  
CgCctGcgagtctGGtatGCGCACTTTCTTCCATCCCATACTTCAAGAGAGTATGGGATGGAAGAAAGTGCATTTTTGct  
cgagctggcgaattcc  
>CD\_NM\_001772.2:413  
CgCctGcgagtctGGtatGATCTGTGCATGTGACAGACTTGTTC AAGAGACAAGTCTGTACATGCACAGAGTTTTGct  
cgagctggcgaattcc  
>CD\_NM\_001772.2:830  
CgCctGcgagtctGGtatGCTGTCTCTGCCTCATCTTCTTCTTCAAGAGAGAAGAAGATGAGGCAGAGACAATTTTTGct  
cgagctggcgaattcc  
>CD\_NM\_001772.2:720  
CgCctGcgagtctGGtatGCACCAACAACCTGGTATCTTTCTTCAAGAGAGAAAGATACCAGTTGTTGGGTTTTTTTTGct  
cgagctggcgaattcc  
>CD\_NM\_001772.2:145  
CgCctGcgagtctGGtatGCTCCCATAACCTACTACGACAATTCAAGAGATTGTCGTAGTAGGGTATGGGATTTTTGct  
cgagctggcgaattcc  
>CD\_NM\_001772.2:237  
CgCctGcgagtctGGtatGCACAAGCTAGATCAAGAAGTACTTCAAGAGAGTACTTCTTGATCTAGCTTGTTTTTTTTGct  
cgagctggcgaattcc  
>CD\_NM\_001772.2:662  
CgCctGcgagtctGGtatGCGGAGCTGGTGTGACTACGGAGTTCAAGAGACTCCGTAGTCACACCAGCTCCATTTTTGct  
cgagctggcgaattcc  
>CD\_NM\_001772.2:824  
CgCctGcgagtctGGtatGAGCTCTTTGTCTCTGCCTCATCTTCAAGAGAGATGAGGCAGAGACAAAGAGCGTTTTGct  
cgagctggcgaattcc  
>CD\_NM\_001772.2:795  
CgCctGcgagtctGGtatGCTTGGAGGAGCTGGTGTACAGTTCAAGAGACTGTAACACCAGCTCCTCCAATTTTTGct  
cgagctggcgaattcc  
>CD\_NM\_001772.2:1001  
CgCctGcgagtctGGtatGCACTGTGGAGATGGATGAGGAGTTCAAGAGACTCCTCATCCATCTCCACAGTATTTTTGct  
cgagctggcgaattcc  
>CD\_NM\_001772.2:839  
CgCctGcgagtctGGtatGACTCATCTTCTTCATAGTGAAGTTCAAGAGACTTCACATATGAAGAAGATGAGGTTTTGct  
cgagctggcgaattcc  
>CD\_NM\_001772.2:832  
CgCctGcgagtctGGtatGATCTCTGCCTCATCTTCTTCAATTTCAAGAGAATGAAGAAGATGAGGCAGAGACTTTTTGct  
cgagctggcgaattcc  
>CD\_NM\_001772.2:1010  
CgCctGcgagtctGGtatGAATGGATGAGGAGCTGCATTATTTCAAGAGAATAATGCAGCTCCTCATCCATTTTTGct  
cgagctggcgaattcc  
>CD\_NM\_001772.2:137  
CgCctGcgagtctGGtatGCTTCTTCCATCCCATAACCTACTTCAAGAGAGTAGGGTATGGGATGGAAGAAATTTTTGct  
cgagctggcgaattcc  
>CD\_NM\_001772.2:507  
CgCctGcgagtctGGtatGCCCTGGGCCGTGTGAGCAGGGAATTCAAGAGATTCCTGCTCACAGGCCAGGATTTTTGct  
cgagctggcgaattcc  
>CD\_NM\_001772.2:192

CgCctGcgagtctGGtatGCTCCGGGAAGGAGCCATTATATTTCAAGAGAATATAATGGCTCCTTCCCGGAATTTTTGct  
cgagctggcgaattcc  
>CD\_NM\_001772.2:421  
CgCctGcgagtctGGtatGCTGTGACAGACTTGACCCACAGTTCAAGAGACTGTGGGTCAAGTCTGTCACATTTTTGct  
cgagctggcgaattcc  
>CD\_NM\_001772.2:1034  
CgCctGcgagtctGGtatGCTCCCTCAACTTTCATGGGATGTTCAAGAGACATCCCATGAAAGTTGAGGGAATTTTTGct  
cgagctggcgaattcc  
>CD\_NM\_001772.2:1068  
CgCctGcgagtctGGtatGAACACCTCCACCGAATACTCAGTTCAAGAGACTGAGTATTCGGTGGAGGTGTCTTTTTGct  
cgagctggcgaattcc  
>CD\_NM\_001772.2:657  
CgCctGcgagtctGGtatGCTCGCTGGAGCTGGTGTGACTATTCAAGAGATAGTCACACCAGCTCCAGCGAATTTTTGct  
cgagctggcgaattcc  
>CD\_NM\_001772.2:826  
CgCctGcgagtctGGtatGATCTTTGTCTCTGCCTCATCTTTTCAAGAGAAAGATGAGGCAGAGACAAAGAGTTTTGct  
cgagctggcgaattcc  
>CD\_NM\_001772.2:701  
CgCctGcgagtctGGtatGAGTCACCTATGTTCCACAGAACTTCAAGAGAGTCTGTGGAACATAGGTGACGTTTTGct  
cgagctggcgaattcc  
>CD\_NM\_001772.2:384  
CgCctGcgagtctGGtatGCCCAAATACAGTTACAAATCTCTTCAAGAGAGAGATTTGTAAGTGTATTTGGTTTTTTGct  
cgagctggcgaattcc  
>CD\_NM\_001772.2:233  
CgCctGcgagtctGGtatGAACAAACAAGCTAGATCAAGAATTCAAGAGATTCTTGATCTAGCTTGTGTTTTTTGct  
cgagctggcgaattcc  
>CD\_NM\_001772.2:496  
CgCctGcgagtctGGtatGACTGCTCTGTGTCCTGGGCTGTTCAAGAGACAGGCCAGGACACAGAGCAGTTTTGct  
cgagctggcgaattcc  
>CD\_NM\_001772.2:836  
CgCctGcgagtctGGtatGATGCCTCATCTTCTTCATAGTGTTCAGAGACACTATGAAGAAGATGAGGCAGTTTTGct  
cgagctggcgaattcc  
>CD\_NM\_001772.2:629  
CgCctGcgagtctGGtatGAGGCACCAACCTGACCTGTCAGTTCAAGAGACTGACAGGTGAGTTGGTGCCGTTTTGct  
cgagctggcgaattcc  
>CD\_NM\_001772.2:966  
CgCctGcgagtctGGtatGACCACTGAAACCTCAAGCTGTTTTCAAGAGAAACAGCTTGAGGTTTCAGTGGTTTTGct  
cgagctggcgaattcc  
>CD\_NM\_001773:555  
CgCctGcgagtctGGtatGCACCTCAGTTTATGGAAACACATTCAAGAGATGTGTTTCCATAAACTGAGGTTTTTTGct  
cgagctggcgaattcc  
>CD\_NM\_001773:586  
CgCctGcgagtctGGtatGATCCAGTCACAGACCTCTGTAATTCAAGAGATTACAGAGGTCTGTGACTGGACTTTTTGct  
cgagctggcgaattcc  
>CD\_NM\_001773:661  
CgCctGcgagtctGGtatGCAGCCTAGCCTGTCACCTGGAATTCAAGAGATTCCAGGTGACAGGCTAGGCTTTTTGct  
cgagctggcgaattcc  
>CD\_NM\_001773:712  
CgCctGcgagtctGGtatGCGCCTTGCAACATCTCCCACTATTCAAGAGATAGTGGGAGATGTTGCAAGGTTTTTTGct  
cgagctggcgaattcc  
>CD\_NM\_001773:843  
CgCctGcgagtctGGtatGAACCTCCAGCTGTGCGGAGTTTTTCAAGAGAAAACCTCCGCACAGCTGGAGGTCTTTTTGct  
cgagctggcgaattcc  
>CD\_NM\_001773.2:1175

CgCctGcgagtctGGtatGAACTGGCTATTTCTGATGAATTTCAAGAGAATTCATCAGGAAATAGCCAGTGTTTTTGct  
cgagctggcgaattcc  
>CD\_NM\_001773.2:555  
CgCctGcgagtctGGtatGCCCTCAGTTTATGAAACACAATTCAGAGATTGTGTTTCCATAAACTGAGGTTTTTTGct  
cgagctggcgaattcc  
>CD\_NM\_001773.2:646  
CgCctGcgagtctGGtatGAAGAGACAACCTTGAAGCCTAGTTCAAGAGACTAGGCTTCAAGGTTGTCTCTGTTTTTGct  
cgagctggcgaattcc  
>CD\_NM\_001773.2:746  
CgCctGcgagtctGGtatGCTCTTCTCCTATCCTAAGTGACTTCAAGAGAGTCACTTAGGATAGGAGAAGATTTTTTGct  
cgagctggcgaattcc  
>CD\_NM\_001773.2:586  
CgCctGcgagtctGGtatGCCAGTCACAGACCTCTGTAATTTCAAGAGAATTACAGAGGTCTGTGACTGGATTTTTGct  
cgagctggcgaattcc  
>CD\_NM\_001773.2:311  
CgCctGcgagtctGGtatGAGCGCTTTGCTTGCTGAGTTTGTTCAGAGACAACTCAGCAAGCAAAGCGCGTTTTTGct  
cgagctggcgaattcc  
>CD\_NM\_001773.2:557  
CgCctGcgagtctGGtatGATCAGTTTATGAAACACAACCTTCAAGAGAGTTTGTGTTTCCATAAACTGAGTTTTTGct  
cgagctggcgaattcc  
>CD\_NM\_001773.2:741  
CgCctGcgagtctGGtatGCCATCATCTTCTCCTATCCTAATTCAGAGATTAGGATAGGAGAAGATGATGTTTTTGct  
cgagctggcgaattcc  
>CD\_NM\_001773.2:1016  
CgCctGcgagtctGGtatGCTCCAGCAAACCTCAACTTATGTTCAAGAGACATAAGTTGGAGTTTGCTGGAATTTTTGct  
cgagctggcgaattcc  
>CD\_NM\_001773.2:763  
CgCctGcgagtctGGtatGATGACATCAAGGCAGAAATCAATTCAGAGATTGATTTCTGCCTTGATGTCACTTTTTGct  
cgagctggcgaattcc  
>CD\_NM\_001773.2:714  
CgCctGcgagtctGGtatGATTGCAACATCTCCACTAACTTCAAGAGAGTTTAGTGGGAGATGTTGCAAGTTTTTGct  
cgagctggcgaattcc  
>CD\_NM\_001773.2:633  
CgCctGcgagtctGGtatGCACGTTTCAACTCCAGAGACAATTCAGAGATTGTCTCTGGAGTTGAAACGTTTTTTGct  
cgagctggcgaattcc  
>CD\_NM\_001773.2:661  
CgCctGcgagtctGGtatGCGCCTAGCCTGTCACCTGGAAATTCAGAGATTTCCAGGTGACAGGCTAGGCTTTTTTGct  
cgagctggcgaattcc  
>CD\_NM\_001773.2:988  
CgCctGcgagtctGGtatGCGCTGGTCTTGGCCAACAGAACTTCAAGAGAGTTCTGTTGGCCAAGACCAGCATTTTTGct  
cgagctggcgaattcc  
>CD\_NM\_001773.2:724  
CgCctGcgagtctGGtatGATCCACTAAACCCTATACATCTTCAAGAGAGATGTATAGGGTTTAGTGGGAGTTTTTGct  
cgagctggcgaattcc  
>CD\_NM\_001773.2:775  
CgCctGcgagtctGGtatGAAGAAATCAAATGTTTCAGGCATTTCAAGAGAATGCCTGAACATTTGATTTCTGTTTTTGct  
cgagctggcgaattcc  
>CD\_NM\_001773.2:534  
CgCctGcgagtctGGtatGCTCACATCTACCTCTGTGATAATTCAGAGATTATCACAGAGGTAGATGTGAATTTTTGct  
cgagctggcgaattcc  
>CD\_NM\_001773.2:983  
CgCctGcgagtctGGtatGCCTACTGCTGGTCTTGGCCAACCTTCAAGAGAGTTGGCCAAGACCAGCAGTAGATTTTTGct  
cgagctggcgaattcc  
>CD\_NM\_001773.2:513

CgCtGcgagtctGGtatGCTCACAGAAACGACAGTCAAATTTCAAGAGAATTTGACTGTGCTTTCTGTGATTTTTTgct  
cgagctggcgaattcc  
>CD\_NM\_001773.2:726  
CgCtGcgagtctGGtatGACCACTAAACCTATAATCATTTCAAGAGAATGATGTATAGGGTTTAGTGGTTTTTgct  
cgagctggcgaattcc  
>CD\_NM\_001773.2:344  
CgCtGcgagtctGGtatGATTCATGAGTCTTGACAACAACCTCAAGAGAGTTGTTGTCAAGACTCATGAACTTTTTgct  
cgagctggcgaattcc  
>CD\_NM\_001773.2:491  
CgCtGcgagtctGGtatGCGGCAATGAGGCCACAACAACCTCAAGAGAGTTGTTGTGGCCTCATTGCCATTTTTTgct  
cgagctggcgaattcc  
>CD\_NM\_001773.2:667  
CgCtGcgagtctGGtatGACCTGTCACCTGGAAATGTTTCTTCAAGAGAGAAACATTTCCAGGTGACAGGCTTTTTTgct  
cgagctggcgaattcc  
>CD\_NM\_001773.2:1154  
CgCtGcgagtctGGtatGACTGCTGGCTGTCTTGGGCATCTTCAAGAGAGATGCCAAGACAGCCAGCAGTTTTTgct  
cgagctggcgaattcc  
>CD\_NM\_001773.2:338  
CgCtGcgagtctGGtatGCTCTGGGTTTCATGAGTCTTGACTTCAAGAGAGTCAAGACTCATGAACCCAGAATTTTTTgct  
cgagctggcgaattcc  
>CD\_NM\_001773.2:845  
CgCtGcgagtctGGtatGATCCAGCTGTGCGGAGTTTAAGTTCAAGAGACTTAAACTCCGCACAGCTGGAGTTTTTgct  
cgagctggcgaattcc  
>CD\_NM\_001773.2:545  
CgCtGcgagtctGGtatGATCTGTGATAACCTCAGTTTTATTTCAAGAGAATAAACTGAGGTTATCACAGAGTTTTTgct  
cgagctggcgaattcc  
>CD\_NM\_001773.2:470  
CgCtGcgagtctGGtatGACTGCACCCTGTGTCTCAACATTTCAAGAGAATGTTGAGACACAGGGTGCAGTTTTTgct  
cgagctggcgaattcc  
>CD\_NM\_000573:6622  
CgCtGcgagtctGGtatGAGCCGTGTGCTACTTCCACTTATTCAAGAGATAAGTGGAAAGTAGCACACGGCCTTTTTTgct  
cgagctggcgaattcc  
>CD\_NM\_000573:5263  
CgCtGcgagtctGGtatGAGCCGTGTGCTATTTCCACTTATTCAAGAGATAAGTGGAAATAGCACACGGCCTTTTTTgct  
cgagctggcgaattcc  
>CD\_NM\_000573:1213  
CgCtGcgagtctGGtatGAGCCGTGTGCTATTTCCAGTAATTTCAAGAGATTACTGGAATAGCACACGGCCTTTTTTgct  
cgagctggcgaattcc  
>CD\_NM\_000651:468  
CgCtGcgagtctGGtatGCGGCATCCAGTTCGGATCCCAAATTTCAAGAGATTGGGATCCGAACTGGATGCCTTTTTTgct  
cgagctggcgaattcc  
>CD\_NM\_000573:472  
CgCtGcgagtctGGtatGCTCCAGTTCGGATCCCAAATTTATTCAAGAGATAATTTGGGATCCGAACTGGATTTTTTgct  
cgagctggcgaattcc  
>CD\_NM\_000651:6209  
CgCtGcgagtctGGtatGATCGGTGTATTTCTACTAATAATTCAAGAGATTATTAGTAGAAATACACCGAGTTTTTgct  
cgagctggcgaattcc  
>CD\_NM\_000573:4630  
CgCtGcgagtctGGtatGCAGCCGCAATTTGTCAACGAATTTCAAGAGATTCGTTGACAAATTGGCGGCTTTTTTgct  
cgagctggcgaattcc  
>CD\_NM\_000573:7373  
CgCtGcgagtctGGtatGCTGCTCTCATAGTTGGCACTTTTTTCAAGAGAAAAGTGCCAACTATGAGAGCATTTTTTgct  
cgagctggcgaattcc  
>CD\_NM\_000651.3:7250



CgCctGcgagtctGGtatGCGGAGATTATGTGACTTTGAAGTTCAAGAGACTTCAAAGTCACATAATCTCCATTTTTGct  
cgagctggcgaattcc  
>CD\_NM\_000651.3:554  
CgCctGcgagtctGGtatGCGGTGATACTGTCATTTGGGATTTCAAGAGAATCCCAAATGACAGTATCACCTTTTTGct  
cgagctggcgaattcc  
>CD\_NM\_000651.3:4847  
CgCctGcgagtctGGtatGACCTCAGTGCATTATACCTAACTTCAAGAGAGTTAGGTATAATGCACTGAGGGTTTTGct  
cgagctggcgaattcc  
>CD\_NM\_000651.3:3497  
CgCctGcgagtctGGtatGACCTCAGTGCATTATACCTAACTTCAAGAGAGTTAGGTATAATGCACTGAGGGTTTTGct  
cgagctggcgaattcc  
>CD\_NM\_000651.3:797  
CgCctGcgagtctGGtatGACCTCAGTGCATTATACCTAACTTCAAGAGAGTTAGGTATAATGCACTGAGGGTTTTGct  
cgagctggcgaattcc  
>CD\_NM\_000651.3:2147  
CgCctGcgagtctGGtatGACCTCAGTGCATTATACCTAACTTCAAGAGAGTTAGGTATAATGCACTGAGGGTTTTGct  
cgagctggcgaattcc  
>CD\_NM\_000651.3:5881  
CgCctGcgagtctGGtatGAACAGTTTGGATCAACAGTTAATTCAAGAGATTAAGTGTGATCCAACTGTGTTTTGct  
cgagctggcgaattcc  
>CD\_NM\_000651.3:6208  
CgCctGcgagtctGGtatGATCGGTGTATTTCTACTAATAATTCAAGAGATTATTAGTAGAAATACACCGAGTTTTGct  
cgagctggcgaattcc  
>CD\_NM\_000651.3:7193  
CgCctGcgagtctGGtatGACCACTGTTTATGAATGGAATCTTCAAGAGAGATTCCATTCATAAACAGTGGGTTTTGct  
cgagctggcgaattcc  
>CD\_NM\_000651.3:431  
CgCctGcgagtctGGtatGCCAGATCCTGTGAATGGCATGTTCAAGAGACATGCCATTCACAGGATCTGGATTTTTGct  
cgagctggcgaattcc  
>CD\_NM\_000651.3:1799  
CgCctGcgagtctGGtatGAATGGTGCATGTGATCACAGACTTCAAGAGAGTCTGTGATCACATGCACCATGTTTTGct  
cgagctggcgaattcc  
>CD\_NM\_000651.3:4499  
CgCctGcgagtctGGtatGAATGGTGCATGTGATCACAGACTTCAAGAGAGTCTGTGATCACATGCACCATGTTTTGct  
cgagctggcgaattcc  
>CD\_NM\_000651.3:3149  
CgCctGcgagtctGGtatGAATGGTGCATGTGATCACAGACTTCAAGAGAGTCTGTGATCACATGCACCATGTTTTGct  
cgagctggcgaattcc  
>CD\_NM\_000651.3:1787  
CgCctGcgagtctGGtatGCCAGTGAATGGCATGGTGCATTTCAAGAGAATGCACCATGCCATTCCTGGATTTTTGct  
cgagctggcgaattcc  
>CD\_NM\_000651.3:4487  
CgCctGcgagtctGGtatGCCAGTGAATGGCATGGTGCATTTCAAGAGAATGCACCATGCCATTCCTGGATTTTTGct  
cgagctggcgaattcc  
>CD\_NM\_000651.3:3137  
CgCctGcgagtctGGtatGCCAGTGAATGGCATGGTGCATTTCAAGAGAATGCACCATGCCATTCCTGGATTTTTGct  
cgagctggcgaattcc  
>CD\_NM\_000651.3:437  
CgCctGcgagtctGGtatGCCCTGTGAATGGCATGGTGCATTTCAAGAGAATGCACCATGCCATTCACAGGATTTTTGct  
cgagctggcgaattcc  
>CD\_NM\_000651.3:273  
CgCctGcgagtctGGtatGCCAACCTAACTGATGAATTTGTTCAAGAGACAAATTCATCAGTTAGGTTGGTTTTGct  
cgagctggcgaattcc  
>CD\_NM\_000651.3:2726

CgCctGcgagtctGGtatGCAGTCCCTCCAGTTATTCCCTAATTTCAAGAGAATTAGGAATAACTGGAGGACTTTTTTTGct  
cgagctggcgaattcc  
>CD\_NM\_000651.3:4076  
CgCctGcgagtctGGtatGCAGTCCCTCCAGTTATTCCCTAATTTCAAGAGAATTAGGAATAACTGGAGGACTTTTTTTGct  
cgagctggcgaattcc  
>CD\_NM\_000651.3:1376  
CgCctGcgagtctGGtatGCAGTCCCTCCAGTTATTCCCTAATTTCAAGAGAATTAGGAATAACTGGAGGACTTTTTTTGct  
cgagctggcgaattcc  
>CD\_NM\_000651.3:7138  
CgCctGcgagtctGGtatGCCAGGGAATCTGGAGCCAATTTTCAAGAGAAATTGGCTCCAGATTCCTTGGTTTTTTGct  
cgagctggcgaattcc  
>CD\_NM\_000651.3:541  
CgCctGcgagtctGGtatGAATGCATCATCTCAGGTGATACTTCAAGAGAGTATCACCTGAGATGATGCATGTTTTTTGct  
cgagctggcgaattcc  
>CD\_NM\_000651.3:1648  
CgCctGcgagtctGGtatGCTCCCATTGGGACATCTTTAAATTCAAGAGATTTAAAGATGTCCCAATGGGAATTTTTGct  
cgagctggcgaattcc  
>CD\_NM\_000651.3:2998  
CgCctGcgagtctGGtatGCTCCCATTGGGACATCTTTAAATTCAAGAGATTTAAAGATGTCCCAATGGGAATTTTTGct  
cgagctggcgaattcc  
>CD\_NM\_000072:1517  
CgCctGcgagtctGGtatGCTTGTGCCTATTCTTTGGCTTATTCAAGAGATAAGCCAAAGAATAGGCACAATTTTTTTGct  
cgagctggcgaattcc  
>CD\_NM\_000072:681  
CgCctGcgagtctGGtatGCGGCTGACAACCTCACAGTTCTTTCAAGAGAAGAACTGTGAAGTTGTCAGCCTTTTTTTGct  
cgagctggcgaattcc  
>CD\_NM\_000072:1105  
CgCctGcgagtctGGtatGAAGGTCAATCTATGCTGTATTTTTCAAGAGAAAATACAGCATAGATTGACCTGTTTTTTGct  
cgagctggcgaattcc  
>CD\_NM\_000072:1604  
CgCctGcgagtctGGtatGCACCTCCTTGGCTGATAGAAATTTCAAGAGATTTCTATCAGGCCAAGGAGTTTTTTTTGct  
cgagctggcgaattcc  
>CD\_NM\_000072:715  
CgCctGcgagtctGGtatGAGCAGCTGCATCCCATATCTATTTCAAGAGAATAGATATGGGATGCAGCTGCCTTTTTTTGct  
cgagctggcgaattcc  
>CD\_NM\_001001548.1:504  
CgCctGcgagtctGGtatGCCACAGGAAGTGATGATGAACTTCAAGAGAGTTCATCATCACTTCTGTGGATTTTTTTGct  
cgagctggcgaattcc  
>CD\_NM\_001001548.1:1390  
CgCctGcgagtctGGtatGCGGACATACTTGGATATTGAACTTCAAGAGAGTTCATATCCAAGTATGTCCTTTTTTTGct  
cgagctggcgaattcc  
>CD\_NM\_001001548.1:1491  
CgCctGcgagtctGGtatGCTTAAAGAATCTGAAGAGGAACCTTCAAGAGAGTTCCTCTCAGATTCTTTAATTTTTTTGct  
cgagctggcgaattcc  
>CD\_NM\_001001548.1:1669  
CgCctGcgagtctGGtatGCTTTCATATTGTGCATGCAGATTTCAAGAGAATCTGCATGCACAATATGAAATTTTTTTGct  
cgagctggcgaattcc  
>CD\_NM\_001001548.1:1252  
CgCctGcgagtctGGtatGCGTACATCATATGGTGTGCTAGTTCAAGAGACTAGCACACCATATGATGTACATTTTTTTGct  
cgagctggcgaattcc  
>CD\_NM\_001001548.1:1257  
CgCctGcgagtctGGtatGCTCATATGGTGTGCTAGACATCTTCAAGAGAGATGTCTAGCACACCATATGATTTTTTTGct  
cgagctggcgaattcc  
>CD\_NM\_001001548.1:1008

CgCtGcgagtctGGtatGCAGTCACTGCGACATGATTAATTTCAAGAGAATTAATCATGTGCGAGTACTTTTTTTGct  
cgagctggcgaattcc  
>CD\_NM\_001001548.1:1131  
CgCtGcgagtctGGtatGAGACGTTAATCTGAAAGGAATCTTCAAGAGAGATTCCTTTTCAAGATTAACGTCGTTTTTTGct  
cgagctggcgaattcc  
>CD\_NM\_001001548.1:1635  
CgCtGcgagtctGGtatGAAGTGTGGTGTGGTGTATTTTTTCAAGAGAAAACATCACCACACCAACTGTTTTTTGct  
cgagctggcgaattcc  
>CD\_NM\_001001548.1:744  
CgCtGcgagtctGGtatGCTTTGTTCAAATGATCCTCAATTTCAAGAGAATTGAGGATCATTGAAACAAATTTTTTTGct  
cgagctggcgaattcc  
>CD\_NM\_001001548.1:1183  
CgCtGcgagtctGGtatGACCTTTGCCTCTCCAGTTGAAATTTCAAGAGATTTCAACTGGAGAGGCAAAGGCTTTTTTTGct  
cgagctggcgaattcc  
>CD\_NM\_001001548.1:1605  
CgCtGcgagtctGGtatGACTCCTTGGCCTGATAGAAATGTTCAAGAGACATTTCTATCAGGCCAAGGAGTTTTTTGct  
cgagctggcgaattcc  
>CD\_NM\_001001548.1:1105  
CgCtGcgagtctGGtatGCGGTCAATCTATGCTGTATTTGTTCAAGAGACAAATACAGCATAGATTGACCTTTTTTTGct  
cgagctggcgaattcc  
>CD\_NM\_001001548.1:656  
CgCtGcgagtctGGtatGCACCTTCACTATCAGTTGGAACCTTCAAGAGAGTTCCAAGTATAGTGAAGTTTTTTTTGct  
cgagctggcgaattcc  
>CD\_NM\_001001548.1:375  
CgCtGcgagtctGGtatGCGGAGACCTGCTTATCCAGAAGTTCAAGAGACTTCTGGATAAGCAGGTCTCCATTTTTTTGct  
cgagctggcgaattcc  
>CD\_NM\_001001548.1:1146  
CgCtGcgagtctGGtatGCGGAATCCCTGTGTATAGATTTTTTCAAGAGAAAATCTATACACAGGGATTCCTTTTTTTGct  
cgagctggcgaattcc  
>CD\_NM\_001001548.1:959  
CgCtGcgagtctGGtatGCTGCCATAATCGACACATATAATTTCAAGAGATTATATGTGTCGATTATGGCAATTTTTTTGct  
cgagctggcgaattcc  
>CD\_NM\_001001548.1:1118  
CgCtGcgagtctGGtatGATGTATTTGAATCCGACGTTAATTTCAAGAGATTAACGTCGATTCAAATACAGTTTTTTGct  
cgagctggcgaattcc  
>CD\_NM\_001001548.1:1107  
CgCtGcgagtctGGtatGATCAATCTATGCTGTATTTGAATTTCAAGAGATTTCAAATACAGCATAGATTGACTTTTTTTGct  
cgagctggcgaattcc  
>CD\_NM\_001001548.1:1004  
CgCtGcgagtctGGtatGAGGAAAGTCACTGCGACATGATTTCAAGAGAATCATGTGCGAGTACTTTCCCTTTTTTTGct  
cgagctggcgaattcc  
>CD\_NM\_001001548.1:658  
CgCtGcgagtctGGtatGACTTCACTATCAGTTGGAACAGTTCAAGAGACTGTTCCAAGTATAGTGAAGTTTTTTGct  
cgagctggcgaattcc  
>CD\_NM\_001001548.1:988  
CgCtGcgagtctGGtatGCGGAATCTGTCTATTGGGAAATTTCAAGAGATTTCCCAATAGGACAGATTCCTTTTTTTGct  
cgagctggcgaattcc  
>CD\_NM\_001001548.1:1443  
CgCtGcgagtctGGtatGCCGGCTGCAGGTCAACCTATTGTTCAAGAGACAATAGGTTGACCTGCAGCCGTTTTTTTTGct  
cgagctggcgaattcc  
>CD\_NM\_001001548.1:1327  
CgCtGcgagtctGGtatGATGTATGCAAGTCTGTATTTTTTCAAGAGAAAACATCAGGACTTGCATACAGTTTTTTGct  
cgagctggcgaattcc  
>CD\_NM\_001001548.1:347

CgCctGcgagtctGGtatGATGTGTTTGGAGGTATTCTAATTTCAAGAGAATTAGAATACCTCCAAACACAGTTTTTgct  
cgagctggcgaattcc  
>CD\_NM\_001001548.1:343  
CgCctGcgagtctGGtatGATGGCTGTGTTTGGAGGTATTCTTCAAGAGAGAATACCTCCAAACACAGCCAGTTTTTgct  
cgagctggcgaattcc  
>CD\_NM\_001001548.1:525  
CgCctGcgagtctGGtatGAAGCAGCAACATTCAAGTTAAGTTCAAGAGACTTAACTTGAATGTTGCTGCTGTTTTTgct  
cgagctggcgaattcc  
>CD\_NM\_001001548.1:1360  
CgCctGcgagtctGGtatGAATGGATTAAACCCAAATGAAGTTCAAGAGACTTCATTTGGGTTTAAATCCATCTTTTTGct  
cgagctggcgaattcc  
>CD\_NM\_001774:142  
CgCctGcgagtctGGtatGCGCCTGATCTTCTGCTTCGGCATTCAAGAGATGCCGAAGCAGAAGATCAGGCTTTTTTgct  
cgagctggcgaattcc  
>CD\_NM\_001774:311  
CgCctGcgagtctGGtatGCCCCTGCCCTCCTGGGCCTGTATTCAAGAGATACAGGCCAGGAGGCAGCGGATTTTTGct  
cgagctggcgaattcc  
>CD\_NM\_001774:589  
CgCctGcgagtctGGtatGAGCGTGCCCTGCTCCTGCTACATTCAAGAGATGTAGCAGGAGCAGGGCACGCTTTTTGct  
cgagctggcgaattcc  
>CD\_NM\_001774:592  
CgCctGcgagtctGGtatGATGCCCTGCTCCTGCTACAACCTTTCAAGAGAAGTTGTAGCAGGAGCAGGGCACTTTTTgct  
cgagctggcgaattcc  
>CD\_NM\_001774:833  
CgCctGcgagtctGGtatGCCGGGTTTCATGACGCTCTCGATTTCAAGAGAATCGAGAGCGTCATGAACCCGATTTTTGct  
cgagctggcgaattcc  
>CD\_NM\_001774.1:80  
CgCctGcgagtctGGtatGATGCCTCAGCCTCATCAAGTACTTCAAGAGAGTACTTGATGAGGCTGAGGCAGTTTTTgct  
cgagctggcgaattcc  
>CD\_NM\_001774.1:142  
CgCctGcgagtctGGtatGACCTGATCTTCTGCTTCGGCATTTCAGAGAATGCCGAAGCAGAAGATCAGGCTTTTTGct  
cgagctggcgaattcc  
>CD\_NM\_001774.1:488  
CgCctGcgagtctGGtatGATGGGACTATGTGCAGTTCCAGTTCAAGAGACTGGAAGTGCACATAGTCCCAGTTTTTgct  
cgagctggcgaattcc  
>CD\_NM\_001774.1:551  
CgCctGcgagtctGGtatGCGTCCTCATCCTGAGAGGTAACCTTCAAGAGAGTTACCTCTCAGGATGAGGACTTTTTTgct  
cgagctggcgaattcc  
>CD\_NM\_001774.1:416  
CgCctGcgagtctGGtatGATTGCGGGACGTCGTAGAGAAATTCAAGAGATTTCTCTACGACGTCCCGCAAGTTTTTgct  
cgagctggcgaattcc  
>CD\_NM\_001774.1:592  
CgCctGcgagtctGGtatGCGCCCTGCTCCTGCTACAACCTTTTCAAGAGAAAGTTGTAGCAGGAGCAGGGCATTTTTTgct  
cgagctggcgaattcc  
>CD\_NM\_001774.1:589  
CgCctGcgagtctGGtatGACGTGCCCTGCTCCTGCTACAATTCAAGAGATTGTAGCAGGAGCAGGGCACGTTTTTgct  
cgagctggcgaattcc  
>CD\_NM\_001774.1:241  
CgCctGcgagtctGGtatGCCCTGGCCATCTCAGGAATCTTTTCAAGAGAAAGATTCCTGAGATGGCCAGGATTTTTGct  
cgagctggcgaattcc  
>CD\_NM\_001774.1:679  
CgCctGcgagtctGGtatGCCCTGGCGGGTCCAGACACAGTTCAAGAGACTGTGTCTGGACCGCGCCAGGTTTTTgct  
cgagctggcgaattcc  
>CD\_NM\_001774.1:218

CgCctGcgagtctGGtatGACCTCTGCAGATCTGGTCCAAATTCAAGAGATTTGGACCAGATCTGCAGAGGCTTTTTGct  
cgagctggcgaattcc  
>CD\_NM\_001774.1:761  
CgCctGcgagtctGGtatGACTCCAGAAGTGGCTGCACAACCTCAAGAGAGTTGTGCAGCCACTTCTGGAGTTTTGct  
cgagctggcgaattcc  
>CD\_NM\_001774.1:844  
CgCctGcgagtctGGtatGAGCTCTCGATATTCCTGTGCAGTTCAAGAGACTGCACAGGAATATCGAGAGCGTTTTGct  
cgagctggcgaattcc  
>CD\_NM\_001774.1:349  
CgCctGcgagtctGGtatGCCCTGTTTGCCACACAGATCACTTCAAGAGAGTGATCTGTGTGGCAAACAGGATTTTTGct  
cgagctggcgaattcc  
>CD\_NM\_001774.1:847  
CgCctGcgagtctGGtatGCCTCGATATTCCTGTGCAGAAATTCAAGAGATTTCTGCACAGGAATATCGAGATTTTTGct  
cgagctggcgaattcc  
>CD\_NM\_001774.1:88  
CgCctGcgagtctGGtatGACCTCATCAAGTACTTCTCTTTTTCAAGAGAAAGAGGAAGTACTTGATGAGGCTTTTTGct  
cgagctggcgaattcc  
>CD\_NM\_001774.1:359  
CgCctGcgagtctGGtatGAACACAGATCACCTGGGAATCTTCAAGAGAGATTTCCAGGGTGATCTGTGTGTTTTGct  
cgagctggcgaattcc  
>CD\_NM\_001774.1:370  
CgCctGcgagtctGGtatGACCTGGGAATCCTCATCTCCACTTCAAGAGAGTGGAGATGAGGATTTCCAGGGTTTTGct  
cgagctggcgaattcc  
>CD\_NM\_001774.1:550  
CgCctGcgagtctGGtatGCAGTCTCATCCTGAGAGGTAATTCAAGAGATTACCTCTCAGGATGAGGACTTTTTTTGct  
cgagctggcgaattcc  
>CD\_NM\_001774.1:230  
CgCctGcgagtctGGtatGATGGTCCAAAGTCTGGCCATCTTCAAGAGAGATGGCCAGGACTTTGGACCAGTTTTGct  
cgagctggcgaattcc  
>CD\_NM\_001774.1:626  
CgCctGcgagtctGGtatGAGACTCCACAATCCTAGATAAGTTCAAGAGACTTATCTAGGATTGTGGAGTCGTTTTGct  
cgagctggcgaattcc  
>CD\_NM\_001774.1:244  
CgCctGcgagtctGGtatGCGGCCATCTCAGGAATCTTCACTTCAAGAGAGTGAAGATTCCTGAGATGGCCATTTTTGct  
cgagctggcgaattcc  
>CD\_NM\_001774.1:208  
CgCctGcgagtctGGtatGCGGCCTTCGTGCCCTCTGCAGATTTCAAGAGAATCTGCAGAGGCACGAAGGCCATTTTTGct  
cgagctggcgaattcc  
>CD\_NM\_001774.1:193  
CgCctGcgagtctGGtatGCGTCTTTGTGGGCTTGGCCTTTTTCAAGAGAAAGGCCAAGCCCACAAAGGACATTTTTGct  
cgagctggcgaattcc  
>CD\_NM\_001774.1:148  
CgCctGcgagtctGGtatGCCTTCTGCTTCGGCATCTGGATTTCAAGAGAATCCAGATGCCGAAGCAGAAGATTTTTGct  
cgagctggcgaattcc  
>CD\_NM\_001774.1:690  
CgCctGcgagtctGGtatGCCCAGACACAGTGCAGACATCTTCAAGAGAAGATGTCTGCACTGTGTCTGGATTTTTGct  
cgagctggcgaattcc  
>CD\_NM\_001774.1:835  
CgCctGcgagtctGGtatGAGTTCATGACGCTCTCGATATTTTTCAAGAGAAATATCGAGAGCGTCATGAACTTTTGct  
cgagctggcgaattcc  
>CD\_NM\_001774.1:346  
CgCctGcgagtctGGtatGCGCTCCTGTTTGCCACACAGATTTCAAGAGAATCTGTGTGGCAAACAGGAGCATTTTTGct  
cgagctggcgaattcc  
>CD\_NM\_001774.1:127

CgCctGcgagtctGGtatGCCTTCGTCCCTCGGCAGCCTGATTTCAAGAGAATCAGGCTGCCGAGGACGAAGATTTTTGct  
cgagctggcgaattcc  
>CD\_NM\_001775:367  
CgCctGcgagtctGGtatGCTGCTTTCAAGGGTGCATTTATTTCAAGAGAATAAATGCACCCTTGAAAGCATTTTTGct  
cgagctggcgaattcc  
>CD\_NM\_001775:397  
CgCctGcgagtctGGtatGCTCCTTGCAACATTACTGAAGATTCAAGAGATCTTCAGTAATGTTGCAAGGATTTTTGct  
cgagctggcgaattcc  
>CD\_NM\_001775:655  
CgCctGcgagtctGGtatGCCCCTGTTTCAGTATTCTGGAATTCAAGAGATTCCAGAATACTGAAACAGGGTTTTGct  
cgagctggcgaattcc  
>CD\_NM\_001775.2:712  
CgCctGcgagtctGGtatGCGTGGTCCATGTGATGCTCAATTTCAAGAGAATTGAGCATCACATGGACCACATTTTTGct  
cgagctggcgaattcc  
>CD\_NM\_001775.2:784  
CgCctGcgagtctGGtatGCGTCCATAATTTGCAACCAGAGTTCAAGAGACTCTGGTTGCAAATTATGGACTTTTTGct  
cgagctggcgaattcc  
>CD\_NM\_001775.2:775  
CgCctGcgagtctGGtatGAAGTGTGGAAGTCCATAATTTGTTCAAGAGACAAATTATGGACTTCCACTCTTTTTGct  
cgagctggcgaattcc  
>CD\_NM\_001775.2:885  
CgCctGcgagtctGGtatGCAGAGCTGGAATCGATTATAAGTTCAAGAGACTTATAATCGATTCCAGCTTTTTGct  
cgagctggcgaattcc  
>CD\_NM\_001775.2:347  
CgCctGcgagtctGGtatGAACTGCCAAAGTGTATGGGATGTTCAAGAGACATCCCATACTTTGGCAGTCTTTTTGct  
cgagctggcgaattcc  
>CD\_NM\_001775.2:830  
CgCctGcgagtctGGtatGATGATACATGGTGGAGAGAAGTTCAAGAGACTTCTCTTCCACCATGTATCACTTTTTGct  
cgagctggcgaattcc  
>CD\_NM\_001775.2:308  
CgCctGcgagtctGGtatGATCAAGTACACTGAAATTCATCTTCAAGAGAGATGAATTTTCAAGTACTTACTTTTTGct  
cgagctggcgaattcc  
>CD\_NM\_001775.2:655  
CgCctGcgagtctGGtatGACCTGTTTCAGTATTCTGGAATTCAAGAGATTTCCAGAATACTGAAACAGGGTTTTGct  
cgagctggcgaattcc  
>CD\_NM\_001775.2:799  
CgCctGcgagtctGGtatGCCAGAGAAGGTTTCAGACACTATTCAAGAGATAGTGTCTGAACCTTCTCTGGTTTTGct  
cgagctggcgaattcc  
>CD\_NM\_001775.2:322  
CgCctGcgagtctGGtatGCATTCATCCTGAGATGAGACATTTCAAGAGAATGTCTCATCTCAGGATGAATTTTTGct  
cgagctggcgaattcc  
>CD\_NM\_001775.2:706  
CgCctGcgagtctGGtatGATGTGATGTGGTCCATGTGATGTTCAAGAGACATCACATGGACCACATCACAGTTTTGct  
cgagctggcgaattcc  
>CD\_NM\_001775.2:541  
CgCctGcgagtctGGtatGAGAGGACACGCTGCTAGGCTACTTCAAGAGAGTAGCCTAGCAGCGTGTCTCTTTTTGct  
cgagctggcgaattcc  
>CD\_NM\_001775.2:184  
CgCctGcgagtctGGtatGCGGCGTCAGTATCCTGGTCTGTTCAAGAGACAGGACCAGGATACTGACGCCATTTTTGct  
cgagctggcgaattcc  
>CD\_NM\_001775.2:174  
CgCctGcgagtctGGtatGCACTCTGTCTTGGCGTCAGTATTTCAAGAGAATACTGACGCCAAGACAGAGTTTTGct  
cgagctggcgaattcc  
>CD\_NM\_001775.2:573

CgCctGcgagtctGGtatGCCCTCACATGGTGTGGTGAATTTTCAAGAGAAATTCACCACACCATGTGAGGTTTTTTGct  
cgagctggcgaattcc  
>CD\_NM\_001775.2:447  
CgCctGcgagtctGGtatGATCAGACCGTACCTTGCAACAATTC AAGAGATTGTTGCAAGGTACGGTCTGAGTTTTTTGct  
cgagctggcgaattcc  
>CD\_NM\_001775.2:647  
CgCctGcgagtctGGtatGCGCAACAACCCGTTTTCAGTATTTCAAGAGAATACTGAAACAGGGTTGTTGCTTTTTTTGct  
cgagctggcgaattcc  
>CD\_NM\_001775.2:341  
CgCctGcgagtctGGtatGAATGTAGACTGCCAAAGTGTATTTCAAGAGAATACACTTTGGCAGTCTACATGTTTTTTGct  
cgagctggcgaattcc  
>CD\_NM\_001775.2:692  
CgCctGcgagtctGGtatGCTTGCAGAAGCTGCCTGTGATGTTCAAGAGACATCACAGGCAGCTTCTGCAAATTTTTGct  
cgagctggcgaattcc  
>CD\_NM\_001775.2:437  
CgCctGcgagtctGGtatGCAGTTGGAACTCAGACCGTACTTCAAGAGAGTACGGTCTGAGTTCCCAACTTTTTTTGct  
cgagctggcgaattcc  
>CD\_NM\_001775.2:703  
CgCctGcgagtctGGtatGCGCCTGTGATGTGGTCCATGTGTTCAAGAGACACATGGACCACATCACAGGCATTTTTGct  
cgagctggcgaattcc  
>CD\_NM\_001775.2:989  
CgCctGcgagtctGGtatGCCTTGCACATCTGAGATCTGAGTTCAAGAGACTCAGATCTCAGATGTGCAAGATTTTTGct  
cgagctggcgaattcc  
>CD\_NM\_001775.2:889  
CgCctGcgagtctGGtatGACTGGAATCGATTATAAGCAAATTC AAGAGATTTGCTTATAATCGATTCCAGCTTTTTTTGct  
cgagctggcgaattcc  
>CD\_NM\_001775.2:351  
CgCctGcgagtctGGtatGACCAAAGTGATGGGATGCTTTTTTCAAGAGAAAAGCATCCCATACACTTTGGCTTTTTTTGct  
cgagctggcgaattcc  
>CD\_NM\_001775.2:445  
CgCctGcgagtctGGtatGCACTCAGACCGTACCTTGCAACTTCAAGAGAGTTGCAAGGTACGGTCTGAGTTTTTTTgct  
cgagctggcgaattcc  
>CD\_NM\_001775.2:186  
CgCctGcgagtctGGtatGACGTCAGTATCCTGGTCTGATTTCAAGAGAATCAGGACCAGGATACTGACGTTTTTTGct  
cgagctggcgaattcc  
>CD\_NM\_001775.2:291  
CgCctGcgagtctGGtatGACGTCCTGGCGGATGCGTCAATTC AAGAGATTGACGCATCGCGCCAGGACGGTTTTTTGct  
cgagctggcgaattcc  
>CD\_NM\_001775.2:430  
CgCctGcgagtctGGtatGCCTAATGAAGTTGGAACTCAGTTCAAGAGACTGAGTTCCCAACTTCATTAGTTTTTTGct  
cgagctggcgaattcc  
>CD\_NM\_001775.2:471  
CgCctGcgagtctGGtatGCTCTTCTTTGGAGCAGAATAAATTC AAGAGATTTATTCTGCTCCAAAGAAGAATTTTTGct  
cgagctggcgaattcc  
>CD\_NM\_001775.2:943  
CgCctGcgagtctGGtatGAAGACCTGACAAGTTTCTTCAGTTCAAGAGACTGAAGAACTTGTGAGGCTGTTTTTTGct  
cgagctggcgaattcc  
>CD\_NM\_001776:243  
CgCctGcgagtctGGtatGCGCGGGTTCTTCTCACACAAGTTTCAAGAGAACTTGTGTGAGAAGAACCCGCATTTTTTTGct  
cgagctggcgaattcc  
>CD\_NM\_001776:883  
CgCctGcgagtctGGtatGCAGGACATTCAGTTGCAAGTATTC AAGAGATACTTGCAACCTGAATGTCCTTTTTTTgct  
cgagctggcgaattcc  
>CD\_NM\_001776:1102

CgCctGcgagtctGGtatGCCCCAGTGTGCCTTCAATGGGATTCAAGAGATCCCATTGAAGGCACACTGGGATTTTTGct  
cgagctggcgaattcc  
>CD\_NM\_001776.1355  
CgCctGcgagtctGGtatGCAGGCTATCATTTACAGCTGATTCAAGAGATCAGCTGTGAAATGATAGCCTTTTTTTGct  
cgagctggcgaattcc  
>CD\_NM\_001776.1552  
CgCctGcgagtctGGtatGATGGCCATCATAGGCTTGCTTATTCAAGAGATAAGCAAGCCTATGATGGCCACTTTTTGct  
cgagctggcgaattcc  
>CD\_NM\_001776.3:391  
CgCctGcgagtctGGtatGCCCTGACTGATTGCATGGAAAGTTCAAGAGACTTCCATGCAATCAGTCAGGTTTTTTGct  
cgagctggcgaattcc  
>CD\_NM\_001776.3:1552  
CgCctGcgagtctGGtatGCGGCCATCATAGGCTTGCTTATTTCAAGAGAATAAGCAAGCCTATGATGGCCATTTTTGct  
cgagctggcgaattcc  
>CD\_NM\_001776.3:1340  
CgCctGcgagtctGGtatGATCCCTCCTTCTGCAAGGCTATTTCAAGAGAATAGCCTTGCAGAAGGAGGGAGTTTTGct  
cgagctggcgaattcc  
>CD\_NM\_001776.3:623  
CgCctGcgagtctGGtatGCATCAACTATCTGCTGGGCAAATTCAGAGATTTGCCAGCAGATAGTTGATATTTTTGct  
cgagctggcgaattcc  
>CD\_NM\_001776.3:827  
CgCctGcgagtctGGtatGAACACATAGCTTCTTGTGCTATTTCAAGAGAATAGCACAGAAGCTATGTGTGTTTTGct  
cgagctggcgaattcc  
>CD\_NM\_001776.3:119  
CgCctGcgagtctGGtatGATCCAAGAATATCCTAGCCATCTTCAAGAGAGATGGCTAGGATATTCTTGAGTTTTTTGct  
cgagctggcgaattcc  
>CD\_NM\_001776.3:918  
CgCctGcgagtctGGtatGAACCCATGCTTTCATCCTGGATTTCAAGAGAATCCAGGATGAAAGCATGGGTCTTTTTGct  
cgagctggcgaattcc  
>CD\_NM\_001776.3:797  
CgCctGcgagtctGGtatGCCGCTCTATGGCAAGGACTACTTCAAGAGAGTAGTCCTTGCCATAGAGGCGATTTTTGct  
cgagctggcgaattcc  
>CD\_NM\_001776.3:776  
CgCctGcgagtctGGtatGACCAGATAATGCTCTGCAATTTTTCAAGAGAAAATTGCAGAGCATTATCTGGTTTTTTGct  
cgagctggcgaattcc  
>CD\_NM\_001776.3:1199  
CgCctGcgagtctGGtatGCTCAGAGAAAGTCTCTCAGGAATTCAGAGATTCCTGAGAGACTTCTCTGATTTTTTTGct  
cgagctggcgaattcc  
>CD\_NM\_001776.3:253  
CgCctGcgagtctGGtatGATCACACAAGTTTATACATCTATTCAAGAGATAGATGTATAAACTTGTGTGAGTTTTTTGct  
cgagctggcgaattcc  
>CD\_NM\_001776.3:1350  
CgCctGcgagtctGGtatGATGCAAGGCTATCATTTACAGTTCAAGAGACTGTGAAATGATAGCCTTGCAGTTTTTTGct  
cgagctggcgaattcc  
>CD\_NM\_001776.3:1581  
CgCctGcgagtctGGtatGCAGCCTTCATATTTCTGGAAAGTTCAAGAGACTTCCAGAAATATGAAGGCTTTTTTTGct  
cgagctggcgaattcc  
>CD\_NM\_001776.3:1098  
CgCctGcgagtctGGtatGCACTCCCAGTGTGCCTTCAATGTTCAAGAGACATTGAAGGCACACTGGGAGTATTTTTGct  
cgagctggcgaattcc  
>CD\_NM\_001776.3:667  
CgCctGcgagtctGGtatGCCAGCATAGTCCCATATGAAACTTCAAGAGAGTTTCATATGGGACTATGCTGATTTTTGct  
cgagctggcgaattcc  
>CD\_NM\_001776.3:1102



CgCtGcgagtctGGtatGACCAGTGTGCCCTCAATGGGATTTCAAGAGAATCCCATTGAAGGCACACTGGGTTTTTGct  
cgagctggcgaattcc  
>CD\_NM\_001776.3:1334  
CgCtGcgagtctGGtatGAATTCTCTCCCTCTTCTGCAATTTCAAGAGATTGCAGAAGGAGGGAGAGAATTTTTTGct  
cgagctggcgaattcc  
>CD\_NM\_001776.3:1547  
CgCtGcgagtctGGtatGAACAGTGGCCATCATAGGCTTGTTCAAGAGACAAGCCTATGATGGCCACTGTGTTTTTGct  
cgagctggcgaattcc  
>CD\_NM\_001776.3:1355  
CgCtGcgagtctGGtatGCGGCTATCATTTACAGCTGATTTCAAGAGAATCAGCTGTGAAATGATAGCCTTTTTTGct  
cgagctggcgaattcc  
>CD\_NM\_001776.3:481  
CgCtGcgagtctGGtatGCGGGTTGCTCAGGATGGAAAGTTCAAGAGACTTCCATCTGAGCAACCGCATTTTTTGct  
cgagctggcgaattcc  
>CD\_NM\_001776.3:1562  
CgCtGcgagtctGGtatGCGGCTTGCTTATCTTTCAAGTTCAAGAGACTTGTGAAAGATAAGCAAGCCTTTTTTGct  
cgagctggcgaattcc  
>CD\_NM\_001776.3:885  
CgCtGcgagtctGGtatGAACATTCAGGTTGCAAGTAATGTTCAAGAGACATTACTTGCAACCTGAATGTCTTTTTTGct  
cgagctggcgaattcc  
>CD\_NM\_001776.3:1502  
CgCtGcgagtctGGtatGATCCACCTATGTCTTCTCATGTTCAAGAGACATGAGGAAGACATAGGTGGAGTTTTTGct  
cgagctggcgaattcc  
>CD\_NM\_001776.3:512  
CgCtGcgagtctGGtatGAGCAGACAGGGTCTGGATGTGTTCAAGAGACACATCCAGAACCCTGTCTGCCTTTTTTGct  
cgagctggcgaattcc  
>CD\_NM\_001776.3:402  
CgCtGcgagtctGGtatGCGCATGGAAAGAGCTAGGGAAAGTTCAAGAGACTTCCCTAGCTCTTTCCATGCATTTTTTGct  
cgagctggcgaattcc  
>CD\_NM\_001776.3:935  
CgCtGcgagtctGGtatGCGGATATAAGAAGGTAGTGAACTTCAAGAGAGTTCACTACCTTCTTATATCCATTTTTTGct  
cgagctggcgaattcc  
>CD\_NM\_001776.3:868  
CgCtGcgagtctGGtatGAGCAGAACTGGCCAAGGACATTTCAAGAGAATGTCTTGGCCAGTTTCTGCCTTTTTTGct  
cgagctggcgaattcc  
>CD\_NM\_001776.3:139  
CgCtGcgagtctGGtatGCCCTTGGCTTCTCCTCTATATTTCAAGAGAATGATAGAGGAGAAGCCAAGGATTTTTTGct  
cgagctggcgaattcc  
>CD\_NM\_001250:216  
CgCtGcgagtctGGtatGATGGTGAGTGACTGCACAGAGTTTCAAGAGAACTCTGTGCAGTCACTCACCAGTTTTTGct  
cgagctggcgaattcc  
>CD\_NM\_001250:514  
CgCtGcgagtctGGtatGACCCAGTCGGCTTCTTCTCCAATTTCAAGAGATTGGAGAAGAAGCCGACTGGGCTTTTTTGct  
cgagctggcgaattcc  
>CD\_NM\_001250:648  
CgCtGcgagtctGGtatGAGGCTGAGAGCCCTGGTGGTGATTCAAGAGATCACCACCAGGGCTCTCAGCCGTTTTTGct  
cgagctggcgaattcc  
>CD\_NM\_001250:699  
CgCtGcgagtctGGtatGCTCCTCTTGGTGCTGGTCTTTATTCAAGAGATAAAGACCAGCACCAAGAGATTTTTTGct  
cgagctggcgaattcc  
>CD\_NM\_001250:729  
CgCtGcgagtctGGtatGATGGCCAAGAAGCCAACCAATTTCAAGAGATATTGGTTGGCTTCTTGGCCACTTTTTTGct  
cgagctggcgaattcc  
>CD\_NM\_001250:513

CgCtGcgagtctGGtatGCGCCAGTCGGCTTCTTCTCCATTCAAGAGATGGAGAAGAAGCCGACTGGGCATTTTTGct  
cgagctggcgaattcc  
>CD\_NM\_001250.3:205  
CgCtGcgagtctGGtatGCGGACAGAACTGGTGAGTGACTTCAAGAGAGTCACTCACCAGTTTCTGTCCTTTTTGct  
cgagctggcgaattcc  
>CD\_NM\_001250.3:833  
CgCtGcgagtctGGtatGAAGACTTTACATGGATGCCAACTTCAAGAGAGTTGGCATCCATGTAAAGTCTTTTTGct  
cgagctggcgaattcc  
>CD\_NM\_001250.3:566  
CgCtGcgagtctGGtatGCGGACAAGCTGTGAGACCAAAGTTCAAGAGACTTTGGTCTCACAGCTTGTCATTTTTGct  
cgagctggcgaattcc  
>CD\_NM\_001250.3:254  
CgCtGcgagtctGGtatGATTCTTTCGGGTGAAAGCGAATTTCAAGAGAATTCGCTTTCACCGCAAGGAAGTTTTGct  
cgagctggcgaattcc  
>CD\_NM\_001250.3:533  
CgCtGcgagtctGGtatGCATGTGTCATCTGCTTTCGAAATTTCAAGAGATTTTCGAAAGCAGATGACACATTTTTGct  
cgagctggcgaattcc  
>CD\_NM\_001250.3:337  
CgCtGcgagtctGGtatGCGGGCTTCGGGTCCAGCAGAAGTTCAAGAGACTTCTGCTGGACCCGAAGCCTTTTGct  
cgagctggcgaattcc  
>CD\_NM\_001250.3:857  
CgCtGcgagtctGGtatGATCACCCAGGAGATGGCAAAGTTCAAGAGACTTTGCCATCCTCCTGGGTGACTTTTTGct  
cgagctggcgaattcc  
>CD\_NM\_001250.3:514  
CgCtGcgagtctGGtatGACCAGTCGGCTTCTTCTCCAATTTCAAGAGAATTTGGAGAAGAAGCCGACTGGGTTTTGct  
cgagctggcgaattcc  
>CD\_NM\_001250.3:703  
CgCtGcgagtctGGtatGATTGGTGCTGGTCTTTATCAAATTTCAAGAGATTTGATAAAGACCAGCACCAAGTTTTGct  
cgagctggcgaattcc  
>CD\_NM\_001250.3:216  
CgCtGcgagtctGGtatGCGGTGAGTGACTGCACAGAGTTTTCAAGAGAACTCTGTGCAGTCACTCACCATTTTTGct  
cgagctggcgaattcc  
>CD\_NM\_001250.3:225  
CgCtGcgagtctGGtatGCCTGCACAGAGTTCACTGAACTTCAAGAGAGTTTCAGTGAACCTCTGTGCAGTTTTGct  
cgagctggcgaattcc  
>CD\_NM\_001250.3:236  
CgCtGcgagtctGGtatGCTCACTGAAACGGAATGCCTTCTTCAAGAGAGAAGGCATTCCGTTTCAGTGAATTTTTGct  
cgagctggcgaattcc  
>CD\_NM\_001250.3:519  
CgCtGcgagtctGGtatGCCGGCTTCTTCTCCAATGTGTCTTCAAGAGAGACACATTGGAGAAGAAGCCGATTTTTGct  
cgagctggcgaattcc  
>CD\_NM\_001250.3:872  
CgCtGcgagtctGGtatGAGCAAAGAGAGTCGCATCTCAGTTCAAGAGACTGAGATGCGACTCTCTTGCCTTTTTGct  
cgagctggcgaattcc  
>CD\_NM\_001250.3:298  
CgCtGcgagtctGGtatGAACACACTGCCACCAGCACAAATTTCAAGAGATTTGTGCTGGTGGCAGTGTGTCTTTTTGct  
cgagctggcgaattcc  
>CD\_NM\_001250.3:528  
CgCtGcgagtctGGtatGCCTCCAATGTGTCATCTGCTTTTTTCAAGAGAAAAGCAGATGACACATTGGAGATTTTTGct  
cgagctggcgaattcc  
>CD\_NM\_001250.3:122  
CgCtGcgagtctGGtatGCCCGCTGTCCATCCAGAACCCTTCAAGAGAGTGGTCTGGATGGACAGCGGTTTTGct  
cgagctggcgaattcc  
>CD\_NM\_001250.3:600

CgCtGcgagtctGGtatGCACAGGCAGGCACAAACAAGACTTCAAGAGAGTCTTGTGGTGGCTGCCTGTTTTTTGct  
cgagctggcgaattcc  
>CD\_NM\_001250.3:82  
CgCtGcgagtctGGtatGCCGTCTGCCTCTGCAGTGCCTTCAAGAGAGACGACTGCAGAGGCAGACGATTTTTGct  
cgagctggcgaattcc  
>CD\_NM\_001250.3:806  
CgCtGcgagtctGGtatGAGCTCCAACACTGCTGCTCCAGTTCAAGAGACTGGAGCAGCAGTGTGGAGCCTTTTTGct  
cgagctggcgaattcc  
>CD\_NM\_001250.3:699  
CgCtGcgagtctGGtatGCCCTCTTGGTGCTGGTCTTTATTTCAAGAGAATAAAGACCAGCACCAAGAGGATTTTTGct  
cgagctggcgaattcc  
>CD\_NM\_001250.3:697  
CgCtGcgagtctGGtatGAATCCTCTTGGTGCTGGTCTTTTTCAAGAGAAAAGACCAGCACCAAGAGGATGTTTTGct  
cgagctggcgaattcc  
>CD\_NM\_001250.3:564  
CgCtGcgagtctGGtatGATTGGACAAGCTGTGAGACCAATTCAAGAGATTGGTCTCACAGCTTGTCCAAGTTTTGct  
cgagctggcgaattcc  
>CD\_NM\_001250.3:351  
CgCtGcgagtctGGtatGCGCAGAAGGGCACCTCAGAACTTCAAGAGAGTTTCTGAGGTGCCCTTCTGCTTTTTGct  
cgagctggcgaattcc  
>CD\_NM\_001250.3:194  
CgCtGcgagtctGGtatGCTGTGCCAGCCAGGACAGAACTTCAAGAGAGTTTCTGTCTGGCTGGCACAATTTTTGct  
cgagctggcgaattcc  
>CD\_NM\_001250.3:729  
CgCtGcgagtctGGtatGCGGCCAAGAAGCCAACCAATAATTCAAGAGATTATTGGTTGGCTTCTTGGCCATTTTTGct  
cgagctggcgaattcc  
>CD\_NM\_001250.3:174  
CgCtGcgagtctGGtatGCAAACAGTCAGTGTCTTTTTTCAAGAGAAAAGAACAGCACTGACTGTTATTTTTGct  
cgagctggcgaattcc  
>CD\_NM\_000419:136  
CgCtGcgagtctGGtatGCCCCAGTGCAGCTCACCTTCTATTCAAGAGATAGAAGGTGAGCTGCACTGGGTTTTGct  
cgagctggcgaattcc  
>CD\_NM\_000419:861  
CgCtGcgagtctGGtatGAGGGATCTCAACACTACAGAATTTCAAGAGAATTCTGTAGTGTGAGATCCCCTTTTTGct  
cgagctggcgaattcc  
>CD\_NM\_000419:967  
CgCtGcgagtctGGtatGACGCAGAGCAGATGGCGTCGTATTCAAGAGATACGACGCCATCTGCTCTGCGTTTTGct  
cgagctggcgaattcc  
>CD\_NM\_000419:1041  
CgCtGcgagtctGGtatGATGCTGGTGGGCGCTCCACTGTTTTCAAGAGAACAGTGGAGCGCCCACCAGCAGTTTTGct  
cgagctggcgaattcc  
>CD\_NM\_000419:1224  
CgCtGcgagtctGGtatGAACCGGGATGGCTACAATGACATTCAAGAGATGTCATTGTAGCCATCCCGTCTTTTTGct  
cgagctggcgaattcc  
>CD\_NM\_000419:2494  
CgCtGcgagtctGGtatGACCCTGGGACTGTGAATGGTCTTTCAAGAGAAGACCATTACAGTCCCAGGGCTTTTTGct  
cgagctggcgaattcc  
>CD\_NM\_000419:2211  
CgCtGcgagtctGGtatGCACGCCAGATAGGAATCGCGATTCAAGAGATCGCGATTCTATCTGGGCGTTTTTTGct  
cgagctggcgaattcc  
>CD\_NM\_000419:1711  
CgCtGcgagtctGGtatGAAGGCACCACCCTGAACCTGGATTCAAGAGATCCAGGTTAGGGTGGTGCCTGTTTTGct  
cgagctggcgaattcc  
>CD\_NM\_000419.2:2128

CgCtGcgagtctGGtatGATTTGAGAGACTCATCTGTAATTTCAAGAGAATTACAGATGAGTCTCTCAAAGTTTTTGct  
cgagctggcgaattcc  
>CD\_NM\_000419.2:2002  
CgCtGcgagtctGGtatGAGCAGATAATGTCCTGGAGCTGTTCAAGAGACAGCTCCAGGACATTATCTGCCTTTTTTGct  
cgagctggcgaattcc  
>CD\_NM\_000419.2:1102  
CgCtGcgagtctGGtatGACGTGTGTATTTGTTTCCTGCAGTTCAAGAGACTGCAGGAACAAATACACACGCTTTTTTGct  
cgagctggcgaattcc  
>CD\_NM\_000419.2:777  
CgCtGcgagtctGGtatGACCAGAGCCTCTCCTTTGACTCTTCAAGAGAGAGTCAAAGGAGAGGCTCTGGGTTTTTGct  
cgagctggcgaattcc  
>CD\_NM\_000419.2:1563  
CgCtGcgagtctGGtatGAACCCGTGAGCTGCTTCAACATTTCAAGAGAATGTTGAAGCAGCTCACGGGTGTTTTTGct  
cgagctggcgaattcc  
>CD\_NM\_000419.2:805  
CgCtGcgagtctGGtatGACCAGAGTACTTCGACGGCTACTTCAAGAGAGTAGCCGTCGAAGTACTCTGGGTTTTTGct  
cgagctggcgaattcc  
>CD\_NM\_000419.2:2470  
CgCtGcgagtctGGtatGAACCTATGAGCTCCACAACAATTTCAAGAGAATGTTGTGGAGCTCATAGGTGTTTTTGct  
cgagctggcgaattcc  
>CD\_NM\_000419.2:2494  
CgCtGcgagtctGGtatGACCTGGGACTGTGAATGGTCTTTTTCAAGAGAAAGACCATTACAGTCCCAGGGTTTTTGct  
cgagctggcgaattcc  
>CD\_NM\_000419.2:136  
CgCtGcgagtctGGtatGACCAGTGCAGCTCACCTTCTATTTCAAGAGAATAGAAGGTGAGCTGCACTGGGTTTTTGct  
cgagctggcgaattcc  
>CD\_NM\_000419.2:2320  
CgCtGcgagtctGGtatGAAGCAAGATTGTGCTGCTGGACTTCAAGAGAGTCCAGCAGCACAACTTGCTGTTTTTGct  
cgagctggcgaattcc  
>CD\_NM\_000419.2:685  
CgCtGcgagtctGGtatGAGGCTATTATTTCTTAGGTCTCTTCAAGAGAGAGACCTAAGAAATAATAGCCGTTTTTGct  
cgagctggcgaattcc  
>CD\_NM\_000419.2:2698  
CgCtGcgagtctGGtatGAAGACAGATCTTCTGCCAGAGTTCAAGAGACTCTGGCAGGAAGATCTGTCTGTTTTTGct  
cgagctggcgaattcc  
>CD\_NM\_000419.2:1870  
CgCtGcgagtctGGtatGCGCTGTGCTGCTGCATGGAGACTTCAAGAGAGTCTCCATGCAGCACGACAGCATTTTTTGct  
cgagctggcgaattcc  
>CD\_NM\_000419.2:2286  
CgCtGcgagtctGGtatGCGCAGATACGGAGCAAGAACAGTTCAAGAGACTGTTCTTGCTCCGTATCTGCATTTTTGct  
cgagctggcgaattcc  
>CD\_NM\_000419.2:680  
CgCtGcgagtctGGtatGACTGGCGCTATTATTTCTTAGTTCAAGAGACTAAGAAATAATAGCCGCCAGGTTTTTGct  
cgagctggcgaattcc  
>CD\_NM\_000419.2:187  
CgCtGcgagtctGGtatGCTCACTGGACTTCCACAAGGACTTCAAGAGAGTCCCTTGTGGAAGTCCAGTGAATTTTTGct  
cgagctggcgaattcc  
>CD\_NM\_000419.2:775  
CgCtGcgagtctGGtatGATCCAGAGCCTCTCCTTTGACTTCAAGAGAGTCAAAGGAGAGGCTCTGGGAGTTTTTGct  
cgagctggcgaattcc  
>CD\_NM\_000419.2:2557  
CgCtGcgagtctGGtatGACTGCTCTACATCTGGATATATTCAAGAGATATATCCAGGATGTAGAGCAGGTTTTTGct  
cgagctggcgaattcc  
>CD\_NM\_000419.2:1516

CgCctGcgagtctGGtatGCTCACTGAATCCTGCTGTGAAGTTCAAGAGACTTCACAGCAGGATTCAGTGAATTTTTGct  
cgagctggcgaattcc  
>CD\_NM\_000419.2:2895  
CgCctGcgagtctGGtatGCGCAGTCGCACGCATGGTTCAATTC AAGAGATTGAACCATGCGTGC GACTGCATTTTTGct  
cgagctggcgaattcc  
>CD\_NM\_000419.2:630  
CgCctGcgagtctGGtatGAGGGCTTCAGCTCCGTGGTCACTTCAAGAGAGTGACCACGGAGCTGAAGCCGTTTTGct  
cgagctggcgaattcc  
>CD\_NM\_000419.2:2509  
CgCctGcgagtctGGtatGCGGTCTTCACCTCAGCATCCACTTCAAGAGAGTGGATGCTGAGGTGAAGACCATTTTTGct  
cgagctggcgaattcc  
>CD\_NM\_000419.2:1048  
CgCctGcgagtctGGtatGAGGCGCTCCACTGTATATGGAGTTCAAGAGACTCCATATACAGTGGAGCGCCTTTTGct  
cgagctggcgaattcc  
>CD\_NM\_000419.2:2011  
CgCctGcgagtctGGtatGCGTCTGGAGCTGCAGATGGACTTCAAGAGAGTCCATCTGCAGCTCCAGGACATTTTTGct  
cgagctggcgaattcc  
>CD\_NM\_000419.2:1618  
CgCctGcgagtctGGtatGCCCTCAGAAGCTATCCCTAAATTTCAAGAGAATTTAGGGATAGCTTCTGAGGATTTTTGct  
cgagctggcgaattcc  
>CD\_NM\_000174:347  
CgCctGcgagtctGGtatGAGCCACCTTCTGCTGGCCAACATTCAAGAGATGTTGGCCAGCAGAAGGTGGCGTTTTGct  
cgagctggcgaattcc  
>CD\_NM\_000174:657  
CgCctGcgagtctGGtatGCGGCCCGCTGGGCCTGGCTCTTTCAAGAGAAGAGCCAGGCCAGCGGCCATTTTTGct  
cgagctggcgaattcc  
>CD\_NM\_000174.2:345  
CgCctGcgagtctGGtatGACGCCACCTTCTGCTGGCCAACCTTCAAGAGAGTTGGCCAGCAGAAGGTGGCGTTTTGct  
cgagctggcgaattcc  
>CD\_NM\_000174.2:420  
CgCctGcgagtctGGtatGAACCCCTCGATGTGACGCAGAACTTCAAGAGAGTTCTGCGTCACATCGAGGGTCTTTTTGct  
cgagctggcgaattcc  
>CD\_NM\_000174.2:446  
CgCctGcgagtctGGtatGAGCACTGTGACTGCAGCCTCACTTCAAGAGAGTGAGGCTGCAGTCACAGTGCCTTTTTGct  
cgagctggcgaattcc  
>CD\_NM\_000174.2:450  
CgCctGcgagtctGGtatGATGTGACTGCAGCCTCACCTATTTCAAGAGAATAGGTGAGGCTGCAGTCACAGTTTTGct  
cgagctggcgaattcc  
>CD\_NM\_000174.2:685  
CgCctGcgagtctGGtatGAGCCTGCTGTGTGCCACCACAGTTCAAGAGACTGTGGTGGCACACAGCAGGCCTTTTGct  
cgagctggcgaattcc  
>CD\_NM\_000174.2:700  
CgCctGcgagtctGGtatGCCACAGAGGCCCTGGATTGAGTTCAAGAGACTCAATCCAGGGCCTCTGTGGTTTTTTGct  
cgagctggcgaattcc  
>CD\_NM\_000174.2:203  
CgCctGcgagtctGGtatGACCTGTTCTGCTCTGGGCCACTTCAAGAGAGTGGCCCAGAGCAGGAACAGGGTTTTGct  
cgagctggcgaattcc  
>CD\_NM\_000174.2:350  
CgCctGcgagtctGGtatGCCCTTCTGCTGGCCAACAACAGTTCAAGAGACTGTTGTTGGCCAGCAGAAGGTTTTTGct  
cgagctggcgaattcc  
>CD\_NM\_000174.2:261  
CgCctGcgagtctGGtatGATGCCGCGCCCTGGAAACCATGTTCAAGAGACATGGTTTTCCAGGGCGCGGCAGTTTTGct  
cgagctggcgaattcc  
>CD\_NM\_000174.2:555

CgCtGcgagtctGGtatGACTGGCCGGCTGACAGGCTACTTCAAGAGAGTAGCCTGTCAGCCGGCCAGCTTTTTTGct  
cgagctggcgaattcc  
>CD\_NM\_000174.2:687  
CgCtGcgagtctGGtatGACTGCTGTGTGCCACCACAGAGTTCAAGAGACTCTGTGGTGGCACACAGCAGTTTTTGct  
cgagctggcgaattcc  
>CD\_NM\_000174.2:683  
CgCtGcgagtctGGtatGATGGCCTGCTGTGTGCCACCCTTCAAGAGAGTGGTGGCACACAGCAGGCCAGTTTTTGct  
cgagctggcgaattcc  
>CD\_NM\_000174.2:664  
CgCtGcgagtctGGtatGATGGGCCTGGCTCTTCTGGCTGTTCAAGAGACAGCCAGAAGAGCCAGGCCAGTTTTTGct  
cgagctggcgaattcc  
>CD\_NM\_000174.2:657  
CgCtGcgagtctGGtatGAGCGCTGGGCCTGGCTCTTCTGTTCAAGAGACAGAAGAGCCAGGCCAGCGTTTTTGct  
cgagctggcgaattcc  
>CD\_NM\_000174.2:347  
CgCtGcgagtctGGtatGACCACCTTCTGCTGGCCAACAATTCAAGAGATTGTTGGCCAGCAGAAGGTGGCTTTTTTGct  
cgagctggcgaattcc  
>CD\_NM\_000174.2:509  
CgCtGcgagtctGGtatGCGCTGCAGGTCCGCTGTGCCAGTTCAAGAGACTGGCACAGCGGACCTGCAGCATTTTTTGct  
cgagctggcgaattcc  
>CD\_NM\_000174.2:210  
CgCtGcgagtctGGtatGACTGCTCTGGGCCACAGCAGAGTTCAAGAGACTCTGCTGTGGCCCAGAGCAGTTTTTGct  
cgagctggcgaattcc  
>CD\_NM\_000174.2:208  
CgCtGcgagtctGGtatGCTCCTGCTCTGGGCCACAGCAGTTCAAGAGACTGCTGTGGCCCAGAGCAGGAATTTTTTGct  
cgagctggcgaattcc  
>CD\_NM\_000174.2:348  
CgCtGcgagtctGGtatGACACCTTCTGCTGGCCAACAATTCAAGAGAGTTGTTGGCCAGCAGAAGGTGGTTTTTGct  
cgagctggcgaattcc  
>CD\_NM\_000174.2:256  
CgCtGcgagtctGGtatGCGTACCTGCCGCGCCCTGGAAATTCAAGAGATTTCCAGGGCGCGGCAGGTACATTTTTTGct  
cgagctggcgaattcc  
>CD\_NM\_000174.2:575  
CgCtGcgagtctGGtatGCCAGCTGGGCAGCTGTGGCTGTTCAAGAGACAGCCACAGCTGCCAGCTGGTTTTTTTGct  
cgagctggcgaattcc  
>CD\_NM\_000174.2:257  
CgCtGcgagtctGGtatGATACCTGCCGCGCCCTGGAACTTCAAGAGAGTTTCCAGGGCGCGGCAGGTACTTTTTTGct  
cgagctggcgaattcc  
>CD\_NM\_000174.2:442  
CgCtGcgagtctGGtatGACCTGGCACTGTGACTGCAGCCTTCAAGAGAGGCTGCAGTCACAGTGCCAGGGTTTTTGct  
cgagctggcgaattcc  
>CD\_NM\_000174.2:561  
CgCtGcgagtctGGtatGACGGCTGACAGGCTACCAGCTGTTCAAGAGACAGCTGGTAGCCTGTCAGCCGGTTTTTGct  
cgagctggcgaattcc  
>CD\_NM\_000174.2:702  
CgCtGcgagtctGGtatGAACAGAGGCCCTGGATTGAGCCTTCAAGAGAGGCTCAATCCAGGGCCTCTGTGTTTTTGct  
cgagctggcgaattcc  
>CD\_NM\_000174.2:666  
CgCtGcgagtctGGtatGAGGCCTGGCTCTTCTGGCTGGCTTCAAGAGAGCCAGCCAGAAGAGCCAGGCCTTTTTGct  
cgagctggcgaattcc  
>CD\_NM\_000174.2:222  
CgCtGcgagtctGGtatGAACAGCAGAGGCCACCAAGGACTTCAAGAGAGTCTTGGTGGCCTCTGCTGTGTTTTTGct  
cgagctggcgaattcc  
>CD\_NM\_000174.2:468

CgCtGcgagtctGGtatGATATCTGCGCTCTGGCTGGAGTTCAAGAGACTCCAGCCAGAGGCGCAGATAGTTTTTGct  
cgagctggcgaattcc  
>CD\_NM\_000174.2:698  
CgCtGcgagtctGGtatGACACCACAGAGGCCCTGGATTGTTCAAGAGACAATCCAGGGCCTCTGTGGTGGTTTTTGct  
cgagctggcgaattcc  
>CD\_NM\_000174.2:413  
CgCtGcgagtctGGtatGCGCTGCAGACCCTCGATGTGACTTCAAGAGAGTCCATCGAGGGTCTGCAGCTTTTTTGct  
cgagctggcgaattcc  
>CD\_NM\_000174.2:444  
CgCtGcgagtctGGtatGATGGCACTGTGACTGCAGCCTTTCAAGAGAGAGGCTGCAGTCCAGTCCAGTTTTTGct  
cgagctggcgaattcc  
>CD\_NM\_000173:1092  
CgCtGcgagtctGGtatGATCCTCCTTGCATCCAACACAATTCAAGAGATTGTGTTGGATGCAAGGAGGAGTTTTTGct  
cgagctggcgaattcc  
>CD\_NM\_000173:852  
CgCtGcgagtctGGtatGAGCCAGTGTGCAGTGTGACAATTTCAAGAGAATTGTCACACTGCACACTGGCCTTTTTTGct  
cgagctggcgaattcc  
>CD\_NM\_000173:503  
CgCtGcgagtctGGtatGCAGAGCTCTACCTGAAAGGCAATTCAAGAGATTGCCTTTAGGTAGAGCTTTTTTTGct  
cgagctggcgaattcc  
>CD\_NM\_000173:746  
CgCtGcgagtctGGtatGCATGCAACTGTGAGATCCTCTATTCAAGAGATAGAGGATCTCACAGTTGCATATTTTTTGct  
cgagctggcgaattcc  
>CD\_NM\_000173.3:647  
CgCtGcgagtctGGtatGAACCCCTCTCCTCCAAGAGAACTTCAAGAGAGTTCTCTTGGAGGAGAAGGGTGTTTTTTGct  
cgagctggcgaattcc  
>CD\_NM\_000173.3:620  
CgCtGcgagtctGGtatGACTCCTGAATGGGCTGGAGAATTTCAAGAGAATTCTCCAGCCCATTAGGAGCTTTTTTGct  
cgagctggcgaattcc  
>CD\_NM\_000173.3:1479  
CgCtGcgagtctGGtatGCTCCCTGAACTTGATCAGCCACTTCAAGAGAGTGGCTGATCAAGTTCAGGGATTTTTTGct  
cgagctggcgaattcc  
>CD\_NM\_000173.3:1092  
CgCtGcgagtctGGtatGCCCTCCTTGCATCCAACACAAGTTCAAGAGACTTGTGTTGGATGCAAGGAGGATTTTTTGct  
cgagctggcgaattcc  
>CD\_NM\_000173.3:1658  
CgCtGcgagtctGGtatGAGTTGGGCATGTGAAACCACAGTTCAAGAGACTGTGGTTTACATGCCCAACCTTTTTTGct  
cgagctggcgaattcc  
>CD\_NM\_000173.3:577  
CgCtGcgagtctGGtatGCGCTCAGTCTGGCTAACAACAATTCAAGAGATTGTTGTTAGCCAGACTGAGCTTTTTTGct  
cgagctggcgaattcc  
>CD\_NM\_000173.3:932  
CgCtGcgagtctGGtatGCGGTGACACAGACCTATATGATTTCAAGAGAATCATATAGGTCTGTGTCACCTTTTTTGct  
cgagctggcgaattcc  
>CD\_NM\_000173.3:770  
CgCtGcgagtctGGtatGCCGTGCTGGCTGCAGGACAATTTCAAGAGAATTGTCCTGCAGCCAGCGACGATTTTTTGct  
cgagctggcgaattcc  
>CD\_NM\_000173.3:278  
CgCtGcgagtctGGtatGACCTTACTCGCTCACTCAGTTCAAGAGACTGAGTGGGCGAGTGAAGCTTTTTTGct  
cgagctggcgaattcc  
>CD\_NM\_000173.3:224  
CgCtGcgagtctGGtatGAATCCTCCACCTGAGTGAGAATTTCAAGAGAGTTCTCACTCAGGTGGAGGATTTTTTGct  
cgagctggcgaattcc  
>CD\_NM\_000173.3:668

CgCctGcgagtctGGtatGATCGCTGTATAACAATACCAAAGTTCAAGAGACTTTGGTATTGTATACAGCGAGTTTTTGct  
cgagctggcgaattcc  
>CD\_NM\_000173.3:1653  
CgCctGcgagtctGGtatGCGCTGGGTTGGGCATGTGAACTTCAAGAGAGTTTCACATGCCCAACCCAGCTTTTTTGct  
cgagctggcgaattcc  
>CD\_NM\_000173.3:1589  
CgCctGcgagtctGGtatGAGGCTTCTATGTCTTGGGTCTCTTCAAGAGAGAGACCCAAGACATAGAAGCCTTTTTGct  
cgagctggcgaattcc  
>CD\_NM\_000173.3:250  
CgCctGcgagtctGGtatGCGTACACCTTCTCCCTGGCAACTTCAAGAGAGTTGCCAGGGAGAAGGTGTACATTTTTTGct  
cgagctggcgaattcc  
>CD\_NM\_000173.3:848  
CgCctGcgagtctGGtatGAGTGGCCAGTGTGCAGTGTGACTTCAAGAGAGTCACTGCACACTGGCCACGTTTTTGct  
cgagctggcgaattcc  
>CD\_NM\_000173.3:995  
CgCctGcgagtctGGtatGAACAAGGACTGTGGTCAAGTTCTTCAAGAGAGAACTTGACCACAGTCCTTGTGTTTTTGct  
cgagctggcgaattcc  
>CD\_NM\_000173.3:934  
CgCctGcgagtctGGtatGATGACACAGACCTATATGATTATTCAAGAGATAATCATATAGGTCTGTGTCATTTTTTGct  
cgagctggcgaattcc  
>CD\_NM\_000173.3:1163  
CgCctGcgagtctGGtatGAACACTTCACATGGAATCCATCTTCAAGAGAGATGGATTCCATGTGAAGTGTGTTTTTGct  
cgagctggcgaattcc  
>CD\_NM\_000173.3:1168  
CgCctGcgagtctGGtatGCTCACATGGAATCCATCACATTTTTCAAGAGAAATGTGATGGATTCCATGTGAATTTTTTGct  
cgagctggcgaattcc  
>CD\_NM\_000173.3:503  
CgCctGcgagtctGGtatGCGAGCTCTACCTGAAAGGCAATTTCAAGAGAAATGCCTTTCAGGTAGAGCTTTTTTGct  
cgagctggcgaattcc  
>CD\_NM\_000173.3:818  
CgCctGcgagtctGGtatGCGGTGTGGACGTCAAGGCCATGTTCAAGAGACATGGCCTTGACGTCCACACCTTTTTTGct  
cgagctggcgaattcc  
>CD\_NM\_000173.3:1705  
CgCctGcgagtctGGtatGATCTGACCACAGCCACACAACTTCAAGAGAGTTTGTGTGGCTGTGGTCAGAGTTTTTGct  
cgagctggcgaattcc  
>CD\_NM\_000173.3:392  
CgCctGcgagtctGGtatGCAGCCTGCCCTTGCTAGGGCAGTTCAAGAGACTGCCCTAGCAAGGGCAGGCTTTTTTGct  
cgagctggcgaattcc  
>CD\_NM\_000173.3:746  
CgCctGcgagtctGGtatGCTGCAACTGTGAGATCCTCTATTTCAAGAGAAATAGAGGATCTCACAGTTGCATTTTTTGct  
cgagctggcgaattcc  
>CD\_NM\_000173.3:422  
CgCctGcgagtctGGtatGCGCTCTCACCGTCTGGACGTCTTCAAGAGAGACGTCCAGGACGGTGAGAGCATTTTTTGct  
cgagctggcgaattcc  
>CD\_NM\_000173.3:872  
CgCctGcgagtctGGtatGCTCAGACAAGTTTCCCGTCTACTTCAAGAGAGTAGACGGGAACTTGTCTGAATTTTTTGct  
cgagctggcgaattcc  
>CD\_NM\_000173.3:1045  
CgCctGcgagtctGGtatGATCTATTCTACTCATGGTCCACTTCAAGAGAGTGGACCATGAGTAGAATAGACTTTTTTGct  
cgagctggcgaattcc  
>CD\_NM\_000173.3:1447  
CgCctGcgagtctGGtatGACGTATCACTCTTAGAATCCACTTCAAGAGAGTGGATTCTAAGAGTGATACGGTTTTTGct  
cgagctggcgaattcc  
>CD\_NM\_000173.3:1622



CgCctGcgagtctGGtatGATTTGCCTCTGTGGTCCTCATCTTCAAGAGAGATGAGGACCACAGAGGCCAAAGTTTTTGct  
cgagctggcgaattcc  
>CD\_NM\_000407:199  
CgCctGcgagtctGGtatGCCCCGAGCTGGTGCTGACCGGCATTCAAGAGATGCCGGTCAGCACCAGCTCGGTTTTTTGct  
cgagctggcgaattcc  
>CD\_NM\_000407:398  
CgCctGcgagtctGGtatGCGCGCGGCCGCCTGCTGCCCTATTCAAGAGATAGGGCAGCAGGCGGCCGCGCATTTTTTGct  
cgagctggcgaattcc  
>CD\_NM\_000407:357  
CgCctGcgagtctGGtatGCGCGCCCTACCGCGACCTGCGTTTTCAAGAGAACGCAGGTCGCGGTAGGGCGCATTTTTTGct  
cgagctggcgaattcc  
>CD\_NM\_000407:202  
CgCctGcgagtctGGtatGAAGCTGGTGCTGACCGGCAACATTCAAGAGATGTTGCCGGTCAGCACCAGCTCTTTTTGct  
cgagctggcgaattcc  
>CD\_NM\_000407.3:410  
CgCctGcgagtctGGtatGACTGCCCTATCTGGCCGAGGACTTCAAGAGAGTCCTCGGCCAGATAGGGCAGCTTTTTTGct  
cgagctggcgaattcc  
>CD\_NM\_000407.3:202  
CgCctGcgagtctGGtatGCGCTGGTGCTGACCGGCAACAATTCAAGAGATTGTTGCCGGTCAGCACCAGCTTTTTTGct  
cgagctggcgaattcc  
>CD\_NM\_000407.3:215  
CgCctGcgagtctGGtatGAGGCAACAACCTGACGGCGCTGTTCAAGAGACAGCGCCGTCAGGTTGTTGCCGTTTTTGct  
cgagctggcgaattcc  
>CD\_NM\_000407.3:521  
CgCctGcgagtctGGtatGATTGCTGCTGGTGCTGCTGCTGTTCAAGAGACAGCAGCAGCACCAGCAGCAACTTTTTTGct  
cgagctggcgaattcc  
>CD\_NM\_000407.3:512  
CgCctGcgagtctGGtatGACTGCACGCTTGCTGCTGGTGTTCAAGAGACACCAGCAGCAACGCGTGCAGCTTTTTTGct  
cgagctggcgaattcc  
>CD\_NM\_000407.3:503  
CgCctGcgagtctGGtatGACTTGGGCTGCTGCACGCGTTGTTCAAGAGACAACGCGTGCAGCAGCCCAAGGTTTTTGct  
cgagctggcgaattcc  
>CD\_NM\_000407.3:497  
CgCctGcgagtctGGtatGACTGGGCCTTGGGCTGCTGCACTTCAAGAGAGTGCAGCAGCCCAAGGCCAGCTTTTTTGct  
cgagctggcgaattcc  
>CD\_NM\_000407.3:208  
CgCctGcgagtctGGtatGCGCTGACCGGCAACAACCTGACTTCAAGAGAGTCAGGTTGTTGCCGGTCAGCATTTTTTGct  
cgagctggcgaattcc  
>CD\_NM\_000407.3:199  
CgCctGcgagtctGGtatGACGAGCTGGTGCTGACCGGCAATTCAAGAGATTGCCGGTCAGCACCAGCTCGGTTTTTTGct  
cgagctggcgaattcc  
>CD\_NM\_000407.3:518  
CgCctGcgagtctGGtatGAGCGTTGCTGCTGGTGCTGCTGTTCAAGAGACAGCAGCACCAGCAGCAACGCGTTTTTGct  
cgagctggcgaattcc  
>CD\_NM\_000407.3:200  
CgCctGcgagtctGGtatGAGAGCTGGTGCTGACCGGCAACTTCAAGAGAGTTGCCGGTCAGCACCAGCTCGTTTTTTGct  
cgagctggcgaattcc  
>CD\_NM\_000407.3:401  
CgCctGcgagtctGGtatGAGGCCGCCTGCTGCCCTATCTGTTCAAGAGACAGATAGGGCAGCAGGCGGCCGTTTTTGct  
cgagctggcgaattcc  
>CD\_NM\_000407.3:47  
CgCctGcgagtctGGtatGAGCGCTGAGCTTACTGCTCCTGTTCAAGAGACAGGAGCAGTAAGCTCAGCGCCTTTTTTGct  
cgagctggcgaattcc  
>CD\_NM\_000407.3:413

CgCtGcgagtctGGtatGACCCTATCTGGCCGAGGACGAGTTCAAGAGACTCGTCCTCGGCCAGATAGGGCTTTTTGct  
cgagctggcgaattcc  
>CD\_NM\_000407.3:206  
CgCtGcgagtctGGtatGAGTGCTGACCGGCAACAACCTGTTCAAGAGACAGGTTGTTGCCGGTCAGCACCTTTTTGct  
cgagctggcgaattcc  
>CD\_NM\_000407.3:485  
CgCtGcgagtctGGtatGACAGCTTGCGCTGCTGGGCCTTTTTCAAGAGAAAGGCCAGCAGCGCAAGCTGCTTTTTGct  
cgagctggcgaattcc  
>CD\_NM\_000407.3:509  
CgCtGcgagtctGGtatGACTGCTGCACGCGTTGCTGCTGTTCAAGAGACAGCAGCAACGCGTGCAGCAGCTTTTTGct  
cgagctggcgaattcc  
>CD\_NM\_000407.3:515  
CgCtGcgagtctGGtatGACACGCGTTGCTGCTGGTGTGTTCAAGAGACAGCACCAGCAGCAACGCGTGCCTTTTTGct  
cgagctggcgaattcc  
>CD\_NM\_000407.3:50  
CgCtGcgagtctGGtatGACTGAGCTTACTGCTCCTGCTGTTCAAGAGACAGCAGGAGCAGTAAGCTCAGCTTTTTGct  
cgagctggcgaattcc  
>CD\_NM\_000407.3:523  
CgCtGcgagtctGGtatGCGCTGCTGGTGCTGCTGCTGTTCAAGAGACACAGCAGCAGCACCAGCAGCATTTTTTGct  
cgagctggcgaattcc  
>CD\_NM\_000407.3:627  
CgCtGcgagtctGGtatGACCGGAACCGACGAGTCTGAGTTCAAGAGACTCAGGACTCGTCGGTTCGGCTTTTTGct  
cgagctggcgaattcc  
>CD\_NM\_000407.3:170  
CgCtGcgagtctGGtatGACTGCCGACCGCCTTCCCTGTCTTCAAGAGAGACAGGGAAGGGTTCGGCAGCTTTTTGct  
cgagctggcgaattcc  
>CD\_NM\_000407.3:194  
CgCtGcgagtctGGtatGAACAACCGAGCTGGTGCTGACCTTCAAGAGAGGTCAGCACCAGCTCGGTTGTGTTTTGct  
cgagctggcgaattcc  
>CD\_NM\_000407.3:53  
CgCtGcgagtctGGtatGAAGCTTACTGCTCCTGCTGCTGTTCAAGAGACAGCAGCAGGAGCAGTAAGCTTTTTGct  
cgagctggcgaattcc  
>CD\_NM\_000407.3:403  
CgCtGcgagtctGGtatGACCGCCTGCTGCCCTATCTGGCTTCAAGAGAGCCAGATAGGGCAGCAGGCGCTTTTTGct  
cgagctggcgaattcc  
>CD\_NM\_000407.3:152  
CgCtGcgagtctGGtatGAGGGCTGACTTGGGCCTCGCTGTTCAAGAGACAGCAGGCCCCAAGTCAGCCGTTTTGct  
cgagctggcgaattcc  
>CD\_NM\_000407.3:203  
CgCtGcgagtctGGtatGACTGGTGCTGACCGGCAACAACCTTCAAGAGAGTGTGTTGCCGGTCAGCACCAGCTTTTTGct  
cgagctggcgaattcc  
>CD\_NM\_000407.3:524  
CgCtGcgagtctGGtatGACTGCTGGTGCTGCTGCTGCTGTTCAAGAGAGCACAGCAGCAGCACCAGCAGCTTTTTGct  
cgagctggcgaattcc  
>CD\_NM\_000407.3:154  
CgCtGcgagtctGGtatGAGCTGACTTGGGCCTCGCTGCCTTCAAGAGAGGCAGCAGGCCCCAAGTCAGCTTTTTGct  
cgagctggcgaattcc  
>CD\_NM\_004488:1881  
CgCtGcgagtctGGtatGAATCATCGTGTGTTGCTATGATTTTTCAAGAGAAATCATAGCAAACACGATGATTTTTGct  
cgagctggcgaattcc  
>CD\_NM\_004488:543  
CgCtGcgagtctGGtatGAGGCACCTTCAGTGACCTGATATTCAAGAGATATCAGGTCAGTGAAGGTGCCGTTTTGct  
cgagctggcgaattcc  
>CD\_NM\_004488:1876

CgCctGcgagtctGGtatGCCCCGTGATCATCGTGTTTGCTATTCAAGAGATAGCAAACACGATGATCACGGTTTTTTGct  
cgagctggcgaattcc  
>CD\_NM\_004488.1:1931  
CgCctGcgagtctGGtatGCCAGAGAGAGAGCCCTTGGGTATTCAAGAGATACCCAAGGGCTCTCTCTGATTTTTGct  
cgagctggcgaattcc  
>CD\_NM\_004488.1:752  
CgCctGcgagtctGGtatGCCCTGCCAGTCTCTTCACGAATTTCAAGAGAATTTCGTGAAGAGACTGGCAGGATTTTTGct  
cgagctggcgaattcc  
>CD\_NM\_004488.1:608  
CgCctGcgagtctGGtatGCCAGGTGCGCTGCTGGATAAGTTCAAGAGACTTATCCAGCAGCGCACCTGGATTTTTGct  
cgagctggcgaattcc  
>CD\_NM\_004488.1:1061  
CgCctGcgagtctGGtatGCTCGCACAATCTGACTCTGTTGTTCAAGAGACAACAGAGTCAGATTGTGCGAATTTTTGct  
cgagctggcgaattcc  
>CD\_NM\_004488.1:543  
CgCctGcgagtctGGtatGAGCACCTTCAGTGACCTGATAAATTCAAGAGATTATCAGGTCACTGAAGGTGCCTTTTGct  
cgagctggcgaattcc  
>CD\_NM\_004488.1:1931  
CgCctGcgagtctGGtatGAAGAGAGAGAGCCCTTGGGTAATTCAAGAGATTACCCAAGGGCTCTCTCTGTTTTGct  
cgagctggcgaattcc  
>CD\_NM\_004488.1:1881  
CgCctGcgagtctGGtatGCTCATCGTGTTTGCTATGATTATTCAAGAGATAATCATAGCAAACACGATGATTTTTGct  
cgagctggcgaattcc  
>CD\_NM\_004488.1:427  
CgCctGcgagtctGGtatGAGCACATCTGCTCTTCGGAATTTCAAGAGAATTCCGAAGAGCAGGATGTGCGTTTTGct  
cgagctggcgaattcc  
>CD\_NM\_004488.1:1876  
CgCctGcgagtctGGtatGACGTGATCATCGTGTTTGCTATTTCAAGAGAATAGCAAACACGATGATCACGGTTTTGct  
cgagctggcgaattcc  
>CD\_NM\_004488.1:1076  
CgCctGcgagtctGGtatGCCTGTTGACTCTGTTTCGAGAATTCAAGAGAGTTCTCGAACAGAGTCAACAGATTTTTGct  
cgagctggcgaattcc  
>CD\_NM\_004488.1:1883  
CgCctGcgagtctGGtatGAATCGTGTTTGCTATGATTAAATTCAAGAGATTTAATCATAGCAAACACGATGTTTTGct  
cgagctggcgaattcc  
>CD\_NM\_004488.1:860  
CgCctGcgagtctGGtatGAAGACTTCTGCTCCACTCGAACTTCAAGAGAGTTCGAGTGGAGCAGAAGTCTTTTTGct  
cgagctggcgaattcc  
>CD\_NM\_004488.1:341  
CgCctGcgagtctGGtatGCTGCAAGTGTGCTTCCGGGACTTCAAGAGAGTCCCGGAAGACACACTTGCAATTTTTGct  
cgagctggcgaattcc  
>CD\_NM\_004488.1:1439  
CgCctGcgagtctGGtatGAAGCGTCCAGCTCGACCACAACCTTCAAGAGAGTTGTGGTCGAGCTGGACGCTTTTTGct  
cgagctggcgaattcc  
>CD\_NM\_004488.1:692  
CgCctGcgagtctGGtatGATTTAGAACTGGTTAACCTGTTCAAGAGACAGGTTAACAGTTTCTGAACTTTTTGct  
cgagctggcgaattcc  
>CD\_NM\_004488.1:572  
CgCctGcgagtctGGtatGCACCCTGAGGCTGTCGCGCAACTTCAAGAGAGTTGCGCGACAGCCTCAGGGTTTTTTGct  
cgagctggcgaattcc  
>CD\_NM\_004488.1:773  
CgCctGcgagtctGGtatGCCTGGAGAACCTGAAGTTGTTGTTCAAGAGACAACAACCTCAGGTTCTCCAGATTTTTGct  
cgagctggcgaattcc  
>CD\_NM\_004488.1:574

CgCtGcgagtctGGtatGACCTGAGGCTGTCGCGCAACAATTCAAGAGATTGTTGCGCGACAGCCTCAGGGTTTTTGct  
cgagctggcgaattcc  
>CD\_NM\_004488.1:937  
CgCtGcgagtctGGtatGCGCAGTTCCACCGAAATCACATTTCAAGAGAATGTGATTTCCGGTGGAACTGCATTTTTGct  
cgagctggcgaattcc  
>CD\_NM\_004488.1:880  
CgCtGcgagtctGGtatGCCC GCCTTGTGTCCTCTGGATTCTTCAAGAGAGAATCCAGAGACACAAGGCGGTTTTTTGct  
cgagctggcgaattcc  
>CD\_NM\_004488.1:1046  
CgCtGcgagtctGGtatGCGCGCTCTTCTTCATTCGCACTTCAAGAGAGTGC GAATGAAGAAAGAGCGCATTTTTGct  
cgagctggcgaattcc  
>CD\_NM\_004488.1:1088  
CgCtGcgagtctGGtatGATTCGAGAACCCGCTGGCAGAGTTCAAGAGACTCTGCCAGCGGGTCTCGAACTTTTTGct  
cgagctggcgaattcc  
>CD\_NM\_004488.1:982  
CgCtGcgagtctGGtatGCCGACCGGCTCCCAAACCTCAGTTCAAGAGACTGAGGTTTGGGAGCCGGTCGATTTTTGct  
cgagctggcgaattcc  
>CD\_NM\_004488.1:787  
CgCtGcgagtctGGtatGCGTTGTTGGATTTATCGGGAAATTCAAGAGATTTCCCGATAAATCCAACAATTTTTGct  
cgagctggcgaattcc  
>CD\_NM\_004488.1:1002  
CgCtGcgagtctGGtatGCGTTCTTTGACGCTTTCGAGAATTCAAGAGATTTCTCGAAAGCGTCAAAGAACTTTTTGct  
cgagctggcgaattcc  
>CD\_NM\_004488.1:1864  
CgCtGcgagtctGGtatGCGGCCATGATCACCGTGATCATTTC AAGAGAATGATCACGGTGATCATGGCCTTTTTGct  
cgagctggcgaattcc  
>CD\_NM\_004488.1:977  
CgCtGcgagtctGGtatGAGCCTTCGACCGGCTCCCAAAC TCAAGAGAGTTTGGGAGCCGGTCGAAGGCCTTTTTGct  
cgagctggcgaattcc  
>CD\_NM\_004488.1:1069  
CgCtGcgagtctGGtatGCTCTGACTCTGTTGACTCTGTTTTCAAGAGAAACAGAGTCAACAGAGTCAGATTTTTGct  
cgagctggcgaattcc  
>CD\_NM\_004488.1:1004  
CgCtGcgagtctGGtatGCTCTTTGACGCTTTCGAGAAACTTCAAGAGAGTTTCTCGAAAGCGTCAAAGAATTTTTGct  
cgagctggcgaattcc  
>CD\_NM\_004488.1:710  
CgCtGcgagtctGGtatGACTGCAGGAGCTCGCTCTGAACTTCAAGAGAGTTCAGAGCGAGCTCCTGCAGGTTTTGct  
cgagctggcgaattcc  
>CD\_NM\_003123:419  
CgCtGcgagtctGGtatGCACCAGGAAGTTTCCATCAAGATTCAAGAGATCTTGATGGAAACTTCTTGGTATTTTTGct  
cgagctggcgaattcc  
>CD\_NM\_003123:520  
CgCtGcgagtctGGtatGAACCGTGACAGGTGGAACCATATTCAAGAGATATGGTTCCACCTGTCACGGTGTTTTTGct  
cgagctggcgaattcc  
>CD\_NM\_003123:1151  
CgCtGcgagtctGGtatGAGGCCACGCTCACC ACTTTCTTTCAAGAGAAGAAAGTGGTGAGCGTGGGCCGTTTTGct  
cgagctggcgaattcc  
>CD\_NM\_001030288.1:266  
CgCtGcgagtctGGtatGCGTACACCACTTCAATAACAAGTTCAAGAGACTTGTATTGAAGTGGTGTACATTTTTGct  
cgagctggcgaattcc  
>CD\_NM\_001030288.1:690  
CgCtGcgagtctGGtatGACCTGTTACCATGGCAACTGACTTCAAGAGAGTCAGTTGCCATGGTAACAGGGTTTTGct  
cgagctggcgaattcc  
>CD\_NM\_001030288.1:521

CgCctGcgagtctGGtatGACGTGACAGGTGGAACCATAACTTCAAGAGAGTTATGGTTCCACCTGTCACGGTTTTTgct  
cgagctggcgaattcc  
>CD\_NM\_001030288.1:647  
CgCctGcgagtctGGtatGCGGCAACTGTCTCTCTGGAGACTTCAAGAGAGTCTCCAGAGAGACAGTTGCCATTTTTGct  
cgagctggcgaattcc  
>CD\_NM\_001030288.1:1157  
CgCctGcgagtctGGtatGAGCTCACCACTTTCTTTGGCAGTTCAAGAGACTGCCAAAGAAAGTGGTGAGCGTTTTTgct  
cgagctggcgaattcc  
>CD\_NM\_001030288.1:419  
CgCctGcgagtctGGtatGCCAGGAAGTTCCATCAAGATTTCAAGAGAATCTTGATGGAACTTCTTGTTTTTTGct  
cgagctggcgaattcc  
>CD\_NM\_001030288.1:515  
CgCctGcgagtctGGtatGACCACACCGTGACAGGTGGAACCTTCAAGAGAGTCCACCTGTCACGGTGTGGTTTTTgct  
cgagctggcgaattcc  
>CD\_NM\_001030288.1:1050  
CgCctGcgagtctGGtatGACCAGCCAGGTCCCTGAGGAGTTCAAGAGACTCCTCAGGGACCTGGGCTGGCTTTTTGct  
cgagctggcgaattcc  
>CD\_NM\_001030288.1:1164  
CgCctGcgagtctGGtatGAACTTTCTTTGGCAGACGGAAGTTCAAGAGACTTCCGTCTGCCAAAGAAAGTGTTTTTGct  
cgagctggcgaattcc  
>CD\_NM\_001030288.1:224  
CgCctGcgagtctGGtatGAAGAGCCTTTGGTCTCTACTAGTTCAAGAGACTAGTAGAGACCAAAGGCTCTTTTTGct  
cgagctggcgaattcc  
>CD\_NM\_001030288.1:701  
CgCctGcgagtctGGtatGCGGCAACTGACTCTCTGGAGACTTCAAGAGAGTCTCCAGAGAGTCAGTTGCCATTTTTGct  
cgagctggcgaattcc  
>CD\_NM\_001030288.1:636  
CgCctGcgagtctGGtatGACCTCTTACCATGGCAACTGTCTTCAAGAGAGACAGTTGCCATGGTAAGAGGGTTTTTgct  
cgagctggcgaattcc  
>CD\_NM\_001030288.1:475  
CgCctGcgagtctGGtatGCGTCATCCTGCTGTTCCATAAATCAAGAGATTATGGGAACAGCAGGATGACTTTTTTgct  
cgagctggcgaattcc  
>CD\_NM\_001030288.1:942  
CgCctGcgagtctGGtatGACTCGTGGCTCTGCTCCTGCTGTTCAAGAGACAGCAGGAGCAGAGCCACGAGTTTTTgct  
cgagctggcgaattcc  
>CD\_NM\_001030288.1:483  
CgCctGcgagtctGGtatGCGCTGTTCCATAACAGCAAACCTTCAAGAGAGTTTGTGTTATGGGAACAGCATTTTTGct  
cgagctggcgaattcc  
>CD\_NM\_001030288.1:871  
CgCctGcgagtctGGtatGAGGAACCCAGATGAGAACTCACTTCAAGAGAGTGAGTTCTCATCTGGGTTCGGTTTTTgct  
cgagctggcgaattcc  
>CD\_NM\_001030288.1:326  
CgCctGcgagtctGGtatGACCTACCTCCCTCAACTTCCATTTCAAGAGAATGGAAGTTGAGGGAGGTAGGGTTTTTgct  
cgagctggcgaattcc  
>CD\_NM\_001030288.1:1149  
CgCctGcgagtctGGtatGCCGGCCCACGCTCACCACTTTCTTCAAGAGAGAAAGTGGTGAGCGTGGGCCGATTTTTGct  
cgagctggcgaattcc  
>CD\_NM\_001030288.1:655  
CgCctGcgagtctGGtatGATCTCTCTGGAGACTTCCAAAGTTCAAGAGACTTTGGAAGTCTCCAGAGAGACTTTTTGct  
cgagctggcgaattcc  
>CD\_NM\_001030288.1:593  
CgCctGcgagtctGGtatGAGGCAGCTAGCTCTCTGGAGACTTCAAGAGAGTCTCCAGAGAGCTAGCTGCCGTTTTTgct  
cgagctggcgaattcc  
>CD\_NM\_001030288.1:651

CgCctGcgagtctGGtatGCACTGTCTCTCTGGAGACTTCCTTCAAGAGAGGAAGTCTCCAGAGAGACAGTTTTTTTGct  
cgagctggcgaattcc  
>CD\_NM\_001030288.1:474  
CgCctGcgagtctGGtatGAAGTCATCCTGCTGTTCCCATATTTCAAGAGATATGGGAACAGCAGGATGACTGTTTTTTGct  
cgagctggcgaattcc  
>CD\_NM\_001030288.1:924  
CgCctGcgagtctGGtatGACTGCTGGCGGTCATAGTCTCTTCAAGAGAGAGGACTATGACCGCCAGCAGGTTTTTTGct  
cgagctggcgaattcc  
>CD\_NM\_001030288.1:605  
CgCctGcgagtctGGtatGATCTGGAGACCTCCAGAGGCACTTCAAGAGAGTGCCTCTGGAGGTCTCCAGAGTTTTTTGct  
cgagctggcgaattcc  
>CD\_NM\_001030288.1:520  
CgCctGcgagtctGGtatGCCCGTGACAGGTGGAACCATAATTCAAGAGATTATGGTTCACCTGTCACGGTTTTTTGct  
cgagctggcgaattcc  
>CD\_NM\_001030288.1:287  
CgCctGcgagtctGGtatGATGACCCTAAGGCCGACAGCACTTCAAGAGAGTGTGTCGGCCTTAGGGTCACTTTTTTGct  
cgagctggcgaattcc  
>CD\_NM\_001030288.1:659  
CgCctGcgagtctGGtatGATCTGGAGACTTCCAAAGGCACTTCAAGAGAGTGCCTTTGGAAGTCTCCAGAGTTTTTTGct  
cgagctggcgaattcc  
>CD\_NM\_001030288.1:638  
CgCctGcgagtctGGtatGATCTTACCATGGCAACTGTCTCTTCAAGAGAGAGACAGTTGCCATGGTAAGAGTTTTTTGct  
cgagctggcgaattcc  
>CD\_NM\_001030288.1:138  
CgCctGcgagtctGGtatGAGCCACGCTTCTCCTTCTCCTTTTTCAAGAGAAAGGAGAAGGAGAAGCGTGGCCTTTTTTTGct  
cgagctggcgaattcc  
>CD\_NM\_001030288.1:331  
CgCctGcgagtctGGtatGACTCCCTCAACTTCCATCAATGTTCAAGAGACATTGATGGAAGTTGAGGGAGTTTTTTGct  
cgagctggcgaattcc  
>CD\_NM\_000610:491  
CgCctGcgagtctGGtatGAGCGCAGATCGATTTGAATATATTCAAGAGATATATTCAAATCGATCTGCGCCTTTTTTTGct  
cgagctggcgaattcc  
>CD\_NM\_000610:512  
CgCctGcgagtctGGtatGCACCTGCCGCTTTGCAGGTGTATTCAAGAGATACACCTGCAAAGCGGCAGGTTTTTTTTGct  
cgagctggcgaattcc  
>CD\_NM\_000610:764  
CgCctGcgagtctGGtatGAACCTCCCAGTATGACACATATTTCAAGAGAATATGTGTCTACTGGGAGGTGTTTTTTGct  
cgagctggcgaattcc  
>CD\_NM\_000610:2538  
CgCctGcgagtctGGtatGAAGGCCAGCAAGTCTCAGGAAATTCAAGAGATTTCTGAGACTTGCTGGCCTTTTTTTGct  
cgagctggcgaattcc  
>CD\_NM\_000610:489  
CgCctGcgagtctGGtatGATGGCGCAGATCGATTTGAATATTTCAAGAGATATTCAAATCGATCTGCGCCAGTTTTTTGct  
cgagctggcgaattcc  
>CD\_NM\_000610:1484  
CgCctGcgagtctGGtatGCGGCACCACTGCTTATGAAGGATTCAAGAGATCCTTCATAAGCAGTGGTGCCATTTTTTTGct  
cgagctggcgaattcc  
>CD\_NM\_000610.3:639  
CgCctGcgagtctGGtatGATCTGAGCATCGATTTGAGACTTCAAGAGAGTCTCAAATCCGATGCTCAGAGTTTTTTGct  
cgagctggcgaattcc  
>CD\_NM\_000610.3:2629  
CgCctGcgagtctGGtatGACTGCAGAAATGTGGACATGAAGTTCAAGAGACTTCATGTCCACATTCTGCAGTTTTTTGct  
cgagctggcgaattcc  
>CD\_NM\_000610.3:2339

CgCctGcgagtctGGtatGCACACAACCTCTGGTCCTATAATTCAAGAGATTATAGGACCAGAGGTTGTGTTTTTTTgct  
cgagctggcgaattcc  
>CD\_NM\_000610.3:2538  
CgCctGcgagtctGGtatGCGGCCAGCAAGTCTCAGGAAATTTCAAGAGAATTTCCCTGAGACTTGCTGGCCTTTTTTTGct  
cgagctggcgaattcc  
>CD\_NM\_000610.3:585  
CgCctGcgagtctGGtatGCCCTCTGCAAGGCTTCAATAGTTCAAGAGACTATTGAAAGCCTTGCAGAGGTTTTTTGct  
cgagctggcgaattcc  
>CD\_NM\_000610.3:492  
CgCctGcgagtctGGtatGAGCAGATCGATTTGAATATAACTTCAAGAGAGTTATATTCAAATCGATCTGCGTTTTTTGct  
cgagctggcgaattcc  
>CD\_NM\_000610.3:1850  
CgCctGcgagtctGGtatGCTGGACTCCAGTCATAGTATAATTCAAGAGATTATACTATGACTGGAGTCCATTTTTTTGct  
cgagctggcgaattcc  
>CD\_NM\_000610.3:1538  
CgCctGcgagtctGGtatGAACCATGAGCATCATGAGGAAGTTCAAGAGACTTCCTCATGATGCTCATGGTGTTTTTGct  
cgagctggcgaattcc  
>CD\_NM\_000610.3:1224  
CgCctGcgagtctGGtatGCGGCTGGTACGTCTTCAAATACTTCAAGAGAGTATTTGAAGACGTACCAGCCATTTTTGct  
cgagctggcgaattcc  
>CD\_NM\_000610.3:2557  
CgCctGcgagtctGGtatGCATGGTGCATTTGGTGAACAAGTTCAAGAGACTTGTTCACCAAATGCACCATTTTTTTGct  
cgagctggcgaattcc  
>CD\_NM\_000610.3:2548  
CgCctGcgagtctGGtatGATCTCAGGAAATGGTGCATTTGTTCAAGAGACAAATGCACCATTTCTGAGACTTTTTTTGct  
cgagctggcgaattcc  
>CD\_NM\_000610.3:1814  
CgCctGcgagtctGGtatGCTGGGACGAGGTCATCAAGCAGTTCAAGAGACTGCTTGATGACCTCGTCCCATTTTTTTGct  
cgagctggcgaattcc  
>CD\_NM\_000610.3:2092  
CgCctGcgagtctGGtatGCACTACTTTACTGGAAGGTTATTTCAAGAGAATAACCTTCCAGTAAAGTAGTTTTTTTgct  
cgagctggcgaattcc  
>CD\_NM\_000610.3:1845  
CgCctGcgagtctGGtatGCGGATATGGACTCCAGTCATAGTTCAAGAGACTATGACTGGAGTCCATATCCATTTTTTTGct  
cgagctggcgaattcc  
>CD\_NM\_000610.3:764  
CgCctGcgagtctGGtatGCCCTCCCAGTATGACACATATTTTTCAAGAGAAATATGTGTCTACTGGGAGGTTTTTTTgct  
cgagctggcgaattcc  
>CD\_NM\_000610.3:1978  
CgCctGcgagtctGGtatGCTCACATGAAGGCTTGAAGAATTCAAGAGATTCTTCCAAGCCTTCATGTGATTTTTTTGct  
cgagctggcgaattcc  
>CD\_NM\_000610.3:512  
CgCctGcgagtctGGtatGCCCTGCCGCTTTGCAGGTGTATTTCAAGAGAATACACCTGCAAAGCGGCAGGTTTTTTTgct  
cgagctggcgaattcc  
>CD\_NM\_000610.3:1880  
CgCctGcgagtctGGtatGACTACTGCAAATCCAAACACAGTTCAAGAGACTGTGTTTGGATTTGCAGTAGGTTTTTTGct  
cgagctggcgaattcc  
>CD\_NM\_000610.3:2608  
CgCctGcgagtctGGtatGAACAGCTGATGAGACAAGGAACCTTCAAGAGAGTTCCCTTGTCTCATCAGCTGTCTTTTTTgct  
cgagctggcgaattcc  
>CD\_NM\_000610.3:2208  
CgCctGcgagtctGGtatGAAGATTCCAACCTAATGTCAATTCAAGAGATTGACATTAGAGTTGGAATCTTTTTTTGct  
cgagctggcgaattcc  
>CD\_NM\_000610.3:1446

CgCctGcgagtctGGtatGCTCAGACAACCACAAGGATGACTTCAAGAGAGTCATCCTTGTGGTTGTCTGAATTTTTGct  
cgagctggcgaattcc  
>CD\_NM\_000610.3:1897  
CgCctGcgagtctGGtatGAACAGGTTTGGTGAAGATTTGTTCAAGAGACAAATCTTCCACCAAACCTGTGTTTTGct  
cgagctggcgaattcc  
>CD\_NM\_000610.3:1930  
CgCctGcgagtctGGtatGCCCTCTTCAATGACAACGCAGTTCAAGAGACTGCGTTGTCATTGAAAGAGGTTTTTGTct  
cgagctggcgaattcc  
>CD\_NM\_000610.3:2219  
CgCctGcgagtctGGtatGCCTAATGTCAATCGTTCCTTATTTCAAGAGAATAAGGAACGATTGACATTAGATTTTTGct  
cgagctggcgaattcc  
>CD\_NM\_000610.3:887  
CgCctGcgagtctGGtatGAGCACCCGCTATGTCCAGAAAGTTCAAGAGACTTCTGGACATAGCGGGTGCCTTTTTGct  
cgagctggcgaattcc  
>CD\_NM\_000610.3:2374  
CgCctGcgagtctGGtatGCCAGAATGGCTGATCATCTTGTTCAGAGACAAGATGATCAGCCATTCTGGATTTTTGct  
cgagctggcgaattcc  
>CD\_NM\_000610.3:791  
CgCctGcgagtctGGtatGCATGCTTCAGCTCCACCTGAAGTTCAAGAGACTTCAGGTGGAGCTGAAGCATTTTTTGTct  
cgagctggcgaattcc  
>CD\_NM\_002838:1033  
CgCctGcgagtctGGtatGCAGCAGATACTACTATTTGTTTTTCAAGAGAAAACAAATAGTAGTATCTGCTTTTTTGTct  
cgagctggcgaattcc  
>CD\_NM\_002838:1657  
CgCctGcgagtctGGtatGATGGAAATACTCTGGTTAGAAATTTCAAGAGATTTCTAACCAGAGTATTTCCAGTTTTTGTct  
cgagctggcgaattcc  
>CD\_NM\_002838:2161  
CgCctGcgagtctGGtatGCCCGTGTGAACTCTCTGAGATTTCAAGAGAATCTCAGAGAGTTCAACACGGTTTTTGTct  
cgagctggcgaattcc  
>CD\_NM\_002838:2270  
CgCctGcgagtctGGtatGAAGGGATGAACTGTTGATGATTTCAAGAGAATCATCAACAGTTTCATCCCTGTTTTTGTct  
cgagctggcgaattcc  
>CD\_NM\_002838:2452  
CgCctGcgagtctGGtatGATCCAGATTACATCATTCAGAATTTCAAGAGATTTCTGAATGATGTAATCTGGACTTTTTGTct  
cgagctggcgaattcc  
>CD\_NM\_002838:3225  
CgCctGcgagtctGGtatGCGGCAGATGATCTTCCAAAGAATTTCAAGAGATTTCTTTGGAAGATCATCTGCCATTTTTGTct  
cgagctggcgaattcc  
>CD\_NM\_002838:468  
CgCctGcgagtctGGtatGCGCGGCTCCGCCGCAATGCAATTTCAAGAGATTGCATTGGCGGCGGAGCCGCTTTTTTGTct  
cgagctggcgaattcc  
>CD\_NM\_002838.2:1657  
CgCctGcgagtctGGtatGCGGAAATACTCTGGTTAGAAATTTCAAGAGAATTTCTAACCAGAGTATTTCCATTTTTGTct  
cgagctggcgaattcc  
>CD\_NM\_002838.2:2452  
CgCctGcgagtctGGtatGCCAGATTACATCATTCAGAAATTTCAAGAGATTTCTGAATGATGTAATCTGGATTTTTGTct  
cgagctggcgaattcc  
>CD\_NM\_002838.2:1114  
CgCctGcgagtctGGtatGATGTGGTAATATGATATTTGATTTCAAGAGAATCAAATATCATATTACCACACTTTTTGTct  
cgagctggcgaattcc  
>CD\_NM\_002838.2:3225  
CgCctGcgagtctGGtatGAGCAGATGATCTTCCAAAGAATTTCAAGAGATTTCTTTGGAAGATCATCTGCCATTTTTGTct  
cgagctggcgaattcc  
>CD\_NM\_002838.2:2336



CgCtGcgagtctGGtatGATCACTCGATGTGAAGAAGGAATTCAAGAGATTCCTTCTTACATCGAGTGACTTTTTGct  
cgagctggcgaattcc  
>CD\_NM\_002838.2:2593  
CgCtGcgagtctGGtatGAAGAGTGAATGCCCTCAGCAATTTCAAGAGAATTGCTGAAGGCATTCCTCTTTTTGct  
cgagctggcgaattcc  
>CD\_NM\_002838.2:926  
CgCtGcgagtctGGtatGATTTCCATATCTCATAATTCATTTCAAGAGAATGAATTATGAGATATGGAACTTTTTGct  
cgagctggcgaattcc  
>CD\_NM\_002838.2:1560  
CgCtGcgagtctGGtatGATGTCTCCATGACATCAGATAAATTCAGAGATTATCTGATGTCATGGAGACAGTTTTGct  
cgagctggcgaattcc  
>CD\_NM\_002838.2:2928  
CgCtGcgagtctGGtatGCCAGAGACTTCCTTCATATAGTTCAAGAGACTATATGAAGGAAGTCTCTGGATTTTTGct  
cgagctggcgaattcc  
>CD\_NM\_002838.2:790  
CgCtGcgagtctGGtatGAACTGTGGATTACTTATATAACTTCAAGAGAGTTATATAAGTAATCCACAGTTTTTGct  
cgagctggcgaattcc  
>CD\_NM\_002838.2:3764  
CgCtGcgagtctGGtatGCGCACCTACCCTGCTCAGAATGTTCAAGAGACATTCCTGAGCAGGGTAGGTGCTTTTTGct  
cgagctggcgaattcc  
>CD\_NM\_002838.2:880  
CgCtGcgagtctGGtatGAACAAACAATGAGGTGCATAACTTCAAGAGAGTTATGCACCTCATTGTTTGTGTTTTGct  
cgagctggcgaattcc  
>CD\_NM\_002838.2:1757  
CgCtGcgagtctGGtatGCATGGAGACTATCCTGGAGAACTTCAAGAGAGTTCTCCAGGATAGTCTCCATTTTTGct  
cgagctggcgaattcc  
>CD\_NM\_002838.2:100  
CgCtGcgagtctGGtatGATGGCTTAAACTCTTGGCATTTTTCAAGAGAAAATGCCAAGAGTTAAGCCACTTTTTGct  
cgagctggcgaattcc  
>CD\_NM\_002838.2:2843  
CgCtGcgagtctGGtatGATGAATTTGTCTGAATTACATCTTCAAGAGAGATGTAATTCAGACAAATTCATTTTTGct  
cgagctggcgaattcc  
>CD\_NM\_002838.2:3971  
CgCtGcgagtctGGtatGAGTCTGCAAGTCCAGCTTTAATTCAGAGATTAAAGCTGGACTTGCAGGACTTTTGct  
cgagctggcgaattcc  
>CD\_NM\_002838.2:3775  
CgCtGcgagtctGGtatGCGCTCAGAATGGACAAGTAAAGTTCAAGAGACTTTACTTGTCCATTCTGAGCATTGCT  
cgagctggcgaattcc  
>CD\_NM\_002838.2:2243  
CgCtGcgagtctGGtatGCGGAAATACATTGCTGCACAAGTTCAAGAGACTTGTGCAGCAATGTATTTCTTTTTGct  
cgagctggcgaattcc  
>CD\_NM\_002838.2:3071  
CgCtGcgagtctGGtatGAAGAGTGAGCATGATTCAGATGTTCAAGAGACATCTGAATCATGCTCACTCTTTTTGct  
cgagctggcgaattcc  
>CD\_NM\_002838.2:947  
CgCtGcgagtctGGtatGCGTACTGCTCCTGATAAGACATTTCAAGAGAATGTCTTATCAGGAGCAGTACATTTTTGct  
cgagctggcgaattcc  
>CD\_NM\_002838.2:2782  
CgCtGcgagtctGGtatGAGCCCAGTACATCTTGATCCATTTCAAGAGAATGGATCAAGATGTACTGGGCCTTTTTGct  
cgagctggcgaattcc  
>CD\_NM\_002838.2:1861  
CgCtGcgagtctGGtatGCGCCCTGCTTGTGTTCTCTACTTCAAGAGAGTAGAGAACAACAAGCAGGGCTTTTTGct  
cgagctggcgaattcc  
>CD\_NM\_002838.2:1810

CgCctGcgagtctGGtatGCTCTAAGGCACTGATAGCATTTTTCAAGAGAAAATGCTATCAGTGCCTTAGAATTTTTGct  
cgagctggcgaattcc  
>CD\_NM\_002838.2:3382  
CgCctGcgagtctGGtatGCACCCCTTCGTGTCCTTTGAACTGTTCAAGAGACAGTTCAAAGACACGAAGGGTATTTTTGct  
cgagctggcgaattcc  
>CD\_NM\_002838.2:3399  
CgCctGcgagtctGGtatGCACTGAGACATTCGAAGAGGAATTCGAAGAGATTCCTCTTGAATGTCTCAGTTTTTTTTGct  
cgagctggcgaattcc  
>CD\_NM\_002838.2:2413  
CgCctGcgagtctGGtatGCGGAGATGTTGTTGTAAAGATCTTCAAGAGAGATCTTTACAACAACATCTCCATTTTTGct  
cgagctggcgaattcc  
>CD\_NM\_002389:281  
CgCctGcgagtctGGtatGCAGCTATGGAGCTCATTGGTAATTCAAGAGATTACCAATGAGCTCCATAGCTTTTTTTGct  
cgagctggcgaattcc  
>CD\_NM\_002389:371  
CgCctGcgagtctGGtatGATCCTCTTGCCACCCATACTATTTCAAGAGAATAGTATGGGTGGCAAGAGGAGTTTTTTGct  
cgagctggcgaattcc  
>CD\_NM\_002389:452  
CgCctGcgagtctGGtatGATCCATATATACGGGATCCTTTTTCAAGAGAAAAGGATCCCGTATATATGGACTTTTTGct  
cgagctggcgaattcc  
>CD\_NM\_002389:497  
CgCctGcgagtctGGtatGCTGGGACTTACGAGTTTGTTATTCAAGAGATAACCAAACCTCGTAAGTCCCATTTTTTTGct  
cgagctggcgaattcc  
>CD\_NM\_002389:512  
CgCctGcgagtctGGtatGCTGGTTATCAGATGCACCTTTATTTCAAGAGAATAAAGTGCATCTGATAACCAATTTTTTTGct  
cgagctggcgaattcc  
>CD\_NM\_002389:774  
CgCctGcgagtctGGtatGAACGATTTATTGTGGTGACAATTTCAAGAGAATTGTCACCACAATAAATCGTGTTTTTTTGct  
cgagctggcgaattcc  
>CD\_NM\_002389.3:281  
CgCctGcgagtctGGtatGCGCTATGGAGCTCATTGGTAAATTCAAGAGATTTACCAATGAGCTCCATAGCTTTTTTTGct  
cgagctggcgaattcc  
>CD\_NM\_002389.3:672  
CgCctGcgagtctGGtatGAACACCTTTAGTGAAGTAGAAGTTCAAGAGACTTCTACTTCACTAAAGGTGTGTTTTTTTGct  
cgagctggcgaattcc  
>CD\_NM\_002389.3:1196  
CgCctGcgagtctGGtatGCGCTGTGATTGTTATTGCCATATTCGAAGAGATATGGCAATAACAATCACAGCATTTTTTTGct  
cgagctggcgaattcc  
>CD\_NM\_002389.3:774  
CgCctGcgagtctGGtatGCCGATTTATTGTGGTGACAATTTTCAAGAGAAATTGTCACCACAATAAATCGTGTTTTTTTGct  
cgagctggcgaattcc  
>CD\_NM\_002389.3:534  
CgCctGcgagtctGGtatGCGTAATGAGGGTTATTACTTAATTCAAGAGATTAAGTAATAACCCCTATTACATTTTTTTGct  
cgagctggcgaattcc  
>CD\_NM\_002389.3:517  
CgCctGcgagtctGGtatGCTCAGATGCACCTTTATTTGTAATTCAAGAGATTACAAATAAAGTGCATCTGATTTTTTTGct  
cgagctggcgaattcc  
>CD\_NM\_002389.3:308  
CgCctGcgagtctGGtatGCCCTACTATGAGATTGGTGAATTCAAGAGATTCACCAATCTCATAGTAGGGTTTTTTTTGct  
cgagctggcgaattcc  
>CD\_NM\_002389.3:865  
CgCctGcgagtctGGtatGCACAGATATCAGGATTTGGAAATTCAAGAGATTTCCAAATCCTGATATCTGTTTTTTTTTGct  
cgagctggcgaattcc  
>CD\_NM\_002389.3:1190

CgCctGcgagtctGGtatGAGTCATTGCTGTGATTGTTATTTTTCAAGAGAAATAACAATCACAGCAATGACCTTTTTTGct  
cgagctggcgaattcc  
>CD\_NM\_002389.3:547  
CgCctGcgagtctGGtatGCTTACTTAATTGGTGAAGAAATTTCAAGAGAAATTTCTTCACCAATTAAGTAATTTTTTGct  
cgagctggcgaattcc  
>CD\_NM\_002389.3:708  
CgCctGcgagtctGGtatGAATGCAGTAACTTATAGTTGTGTTCAAGAGACACAACCTATAAGTTACTGCATCTTTTTTGct  
cgagctggcgaattcc  
>CD\_NM\_002389.3:949  
CgCctGcgagtctGGtatGACGACACAATTGTCTGTGACAGTTCAAGAGACTGTCACAGACAATTGTGTCGCTTTTTTGct  
cgagctggcgaattcc  
>CD\_NM\_002389.3:384  
CgCctGcgagtctGGtatGAATACTATTTGTGATCGGAATCTTCAAGAGAGATTCCGATCACAATAAGTATGTTTTTGct  
cgagctggcgaattcc  
>CD\_NM\_002389.3:286  
CgCctGcgagtctGGtatGCGGAGCTCATTGGTAAACCAAATTTCAAGAGATTTGGTTTACCAATGAGCTCCATTTTTTGct  
cgagctggcgaattcc  
>CD\_NM\_002389.3:1297  
CgCctGcgagtctGGtatGCTGAGACCCACAGAGAAGTAAATTTCAAGAGATTTACTTCTCTGTGGGTCTCATTTTTTGct  
cgagctggcgaattcc  
>CD\_NM\_002389.3:382  
CgCctGcgagtctGGtatGACCATACTATTTGTGATCGGAATTTCAAGAGATTTCCGATCACAATAAGTATGGTTTTTGct  
cgagctggcgaattcc  
>CD\_NM\_002389.3:1128  
CgCctGcgagtctGGtatGATCTCAAATTTATCCAGGATATCTTCAAGAGAGATATCCTGGATAAATTTGAGACTTTTTTGct  
cgagctggcgaattcc  
>CD\_NM\_002389.3:1137  
CgCctGcgagtctGGtatGCATCCAGGATATCCTAAACCTGTTCAAGAGACAGGTTTAGGATATCCTGGATATTTTTTGct  
cgagctggcgaattcc  
>CD\_NM\_002389.3:546  
CgCctGcgagtctGGtatGCATTACTTAATTGGTGAAGAAATTTCAAGAGATTTCTTCACCAATTAAGTAATTTTTTGct  
cgagctggcgaattcc  
>CD\_NM\_002389.3:592  
CgCctGcgagtctGGtatGAAGTAGCAATTTGGAGCGGTAATTTCAAGAGATTACCGCTCAAATTTGCTACTGTTTTTGct  
cgagctggcgaattcc  
>CD\_NM\_002389.3:1232  
CgCctGcgagtctGGtatGCGTAATTTGTGTTGTCCCCTACTTTCAAGAGAGTACGGGACAACACAATACTTTTTTGct  
cgagctggcgaattcc  
>CD\_NM\_002389.3:1012  
CgCctGcgagtctGGtatGCGCTGCCTCCATCTAGTACAAATTTCAAGAGATTTGTACTAGATGGAGGCAGCATTTTTTGct  
cgagctggcgaattcc  
>CD\_NM\_002389.3:1202  
CgCctGcgagtctGGtatGAATTGTTATTGCCATAGTTGTTTTCAAGAGAAACAACCTATGGCAATAACAATTTTTTGct  
cgagctggcgaattcc  
>CD\_NM\_002389.3:958  
CgCctGcgagtctGGtatGCTGTCTGTGACAGTAACAGTACTTTCAAGAGAGTACTGTTACTGTACAGACAATTTTTTGct  
cgagctggcgaattcc  
>CD\_NM\_002389.3:912  
CgCctGcgagtctGGtatGCTGTTTGAATGCGATAAGGGTTTTCAAGAGAAACCTTATCGCATTCAAACATTTTTTGct  
cgagctggcgaattcc  
>CD\_NM\_002389.3:947  
CgCctGcgagtctGGtatGAAGCGACACAATTGTCTGTGACTTTCAAGAGAGTACAGACAATTGTGTCGCTGTTTTTGct  
cgagctggcgaattcc  
>CD\_NM\_002389.3:695

CgCctGcgagtctGGtatGCTTTGAGTATCTTGATGCAGTATTCAAGAGATACTGCATCAAGATACTCAAATTTTTTGct  
cgagctggcgaattcc  
>CD\_NM\_001777:222  
CgCctGcgagtctGGtatGATGCGGATCAGCTCAGCTACTATTCAAGAGATAGTAGCTGAGCTGATCCGCAGTTTTTGct  
cgagctggcgaattcc  
>CD\_NM\_001777:230  
CgCctGcgagtctGGtatGAAGCTCAGCTACTATTTAATAAATTC AAGAGATTATTAATAAGTAGCTGAGCTGTTTTTGct  
cgagctggcgaattcc  
>CD\_NM\_001777:769  
CgCctGcgagtctGGtatGCTCGTCCCAGGTGAATATTCATTTCAAGAGAATGAATATTCACCTGGGACGAATTTTTTGct  
cgagctggcgaattcc  
>CD\_NM\_001777:797  
CgCctGcgagtctGGtatGCTGCTACTGGCCTTGGTTTAATTTCAAGAGAATTAACCAAGGCCAGTAGCATTTTTTGct  
cgagctggcgaattcc  
>CD\_NM\_001777:882  
CgCctGcgagtctGGtatGCACCTCCTTCGTCATTGCCATATTCAAGAGATATGGCAATGACGAAGGAGTTTTTTTGct  
cgagctggcgaattcc  
>CD\_NM\_001777:889  
CgCctGcgagtctGGtatGCTCGTCATTGCCATATTGGTTATTTCAAGAGATAACCAATATGGCAATGACGAATTTTTTGct  
cgagctggcgaattcc  
>CD\_NM\_001777.3:289  
CgCctGcgagtctGGtatGCCGTCATTCCATGCTTTGTTACTTCAAGAGAGTAACAAAGCATGGAATGACGATTTTTTGct  
cgagctggcgaattcc  
>CD\_NM\_001777.3:340  
CgCctGcgagtctGGtatGCATACGTAAAGTGGAATTTAATTTCAAGAGATTAATTTCCACTTTACGTATATTTTTTGct  
cgagctggcgaattcc  
>CD\_NM\_001777.3:1071  
CgCctGcgagtctGGtatGCCTATAACAACCTCCTAGGAAAGTTCAAGAGACTTTCCTAGGAGGTTGTATAGTTTTTTTGct  
cgagctggcgaattcc  
>CD\_NM\_001777.3:1029  
CgCctGcgagtctGGtatGATTGGACTAGTTTATATGAAATTTCAAGAGAAATTCATATAAACTAGTCCAAGTTTTTTGct  
cgagctggcgaattcc  
>CD\_NM\_001777.3:227  
CgCctGcgagtctGGtatGCTCAGCTCAGCTACTATTTAATTTCAAGAGAATTAATAAGTAGCTGAGCTGATTTTTTTGct  
cgagctggcgaattcc  
>CD\_NM\_001777.3:874  
CgCctGcgagtctGGtatGCTGGATTAACCTCCTTCGTCATTTCAAGAGAATGACGAAGGAGGTTAATCCAATTTTTTGct  
cgagctggcgaattcc  
>CD\_NM\_001777.3:905  
CgCctGcgagtctGGtatGAGTTATTCAGGTGATAGCCTATTTCAAGAGAATAGGCTATCACCTGAATAACCTTTTTTGct  
cgagctggcgaattcc  
>CD\_NM\_001777.3:294  
CgCctGcgagtctGGtatGCTTCCATGCTTTGTTACTAATATTCAAGAGATATTAGTAACAAAGCATGGAATTTTTTTGct  
cgagctggcgaattcc  
>CD\_NM\_001777.3:230  
CgCctGcgagtctGGtatGCGCTCAGCTACTATTTAATAAATTC AAGAGATTATTAATAAGTAGCTGAGCTTTTTTTGct  
cgagctggcgaattcc  
>CD\_NM\_001777.3:889  
CgCctGcgagtctGGtatGCCGTCATTGCCATATTGGTTATTTCAAGAGAATAACCAATATGGCAATGACGATTTTTTTGct  
cgagctggcgaattcc  
>CD\_NM\_001777.3:683  
CgCctGcgagtctGGtatGCTCCGGTGGTATGGATGAGAAATTC AAGAGATTTCTCATCCATAACCACCGATTTTTTTGct  
cgagctggcgaattcc  
>CD\_NM\_001777.3:222

CgCctGcgagtctGGtatGCGCGGATCAGCTCAGCTACTATTTCAAGAGAATAGTAGCTGAGCTGATCCGCATTTTTTGct  
cgagctggcgaattcc  
>CD\_NM\_001777.3:219  
CgCctGcgagtctGGtatGCGCTGCGGATCAGCTCAGCTACTTCAAGAGAGTAGCTGAGCTGATCCGCAGCATTTTTTGct  
cgagctggcgaattcc  
>CD\_NM\_001777.3:731  
CgCctGcgagtctGGtatGCGTGATCACTGTCATTGTCAATTTTCAAGAGAAATGACAATGACAGTGATCACTTTTTTTGct  
cgagctggcgaattcc  
>CD\_NM\_001777.3:988  
CgCctGcgagtctGGtatGCTCTGATTTTCAAGTTTGTAGTATTTTCAAGAGAATACTCAAACCTGAAATCAGAATTTTTTGct  
cgagctggcgaattcc  
>CD\_NM\_001777.3:491  
CgCctGcgagtctGGtatGCGCTGTCTCACACACAGGAACTTCAAGAGAGTTTCTGTGTGTGAGACAGCATTTTTTGct  
cgagctggcgaattcc  
>CD\_NM\_001777.3:678  
CgCctGcgagtctGGtatGCATAGATCCGGTGGTATGGATGTTCAAGAGACATCCATACCACCGGATCTATATTTTTTGct  
cgagctggcgaattcc  
>CD\_NM\_001777.3:768  
CgCctGcgagtctGGtatGCTCGTCCCAGGTGAATATTTCAATTTTCAAGAGAATGAATATTCACCTGGGACGAATTTTTTGct  
cgagctggcgaattcc  
>CD\_NM\_001777.3:998  
CgCctGcgagtctGGtatGCGGTTTGTAGTATCTTAGCTCTATTCAAGAGATAGAGCTAAGATACTCAAACCTTTTTTTGct  
cgagctggcgaattcc  
>CD\_NM\_001777.3:411  
CgCctGcgagtctGGtatGACCACTGACTTTAGTAGTGCAATTTCAAGAGATTGCACTACTAAAGTCAGTGGGTTTTTTGct  
cgagctggcgaattcc  
>CD\_NM\_001777.3:821  
CgCctGcgagtctGGtatGAACTTCTACAGGGATATTAATATTTCAAGAGATATTAATATCCCTGTAGAAGTCTTTTTTGct  
cgagctggcgaattcc  
>CD\_NM\_001777.3:375  
CgCctGcgagtctGGtatGCACACCTTTGATGGAGCTCTAATTTCAAGAGATTAGAGCTCCATCAAAGGTGTATTTTTTGct  
cgagctggcgaattcc  
>CD\_NM\_001777.3:893  
CgCctGcgagtctGGtatGAATTGCCATATTTGGTTATTCAGTTCAAGAGACTGAATAACCAATATGGCAATGTTTTTTGct  
cgagctggcgaattcc  
>CD\_NM\_001777.3:917  
CgCctGcgagtctGGtatGAATAGCCTATATCCTCGCTGTGTTCAAGAGACACAGCGAGGATATAGGCTATCTTTTTTGct  
cgagctggcgaattcc  
>CD\_NM\_001777.3:708  
CgCctGcgagtctGGtatGCTTGCTTTACTTGTGTGCTGGACTTCAAGAGAGTCCAGCAACAAGTAAAGCAATTTTTTTGct  
cgagctggcgaattcc  
>CD\_NM\_001777.3:537  
CgCctGcgagtctGGtatGCCAGAGAAGGTGAAACGATCATTCAAGAGATGATCGTTTACCTTCTCTGGTTTTTTTGct  
cgagctggcgaattcc  
>CD\_NM\_001777.3:985  
CgCctGcgagtctGGtatGATCTTCTGATTTTCAAGTTTGTAGTTCAAGAGACTCAAACCTGAAATCAGAAGAGTTTTTTGct  
cgagctggcgaattcc  
>CD\_NM\_001778:462  
CgCctGcgagtctGGtatGCTGGATGACAACCTGTTATTTGATTCAAGAGATCAAATAACAGTTGTATCCATTTTTTTGct  
cgagctggcgaattcc  
>CD\_NM\_001778:578  
CgCctGcgagtctGGtatGCACCACCTTATGCCACATAATTTTCAAGAGAATTATGTGGCATAAGGGTGGTTTTTTTTGct  
cgagctggcgaattcc  
>CD\_NM\_001778:683

CgCtGcgagtctGGtatGAGCCCGGTCCTTTGGAGTAGAATTCAAGAGATTCTACTCCAAAGGACCGGGCCTTTTTGct  
cgagctggcgaattcc  
>CD\_NM\_001778:733  
CgCtGcgagtctGGtatGCGCCACCATTTCTGGCCTGTTTTCAAGAGAAACAGGCCAAGAATGGTGGGCATTTTTGct  
cgagctggcgaattcc  
>CD\_NM\_001778.2:166  
CgCtGcgagtctGGtatGATCTGAGAGCCTGCCTGAGAACTTCAAGAGAGTTCTCAGGCAGGCTCTCAGAGTTTTGct  
cgagctggcgaattcc  
>CD\_NM\_001778.2:477  
CgCtGcgagtctGGtatGCTTTGAAACTGTCATGTGTGATTTCAAGAGAATCACACATGACAGTTTCAAATTTTTGct  
cgagctggcgaattcc  
>CD\_NM\_001778.2:625  
CgCtGcgagtctGGtatGAAGCAATTCTGTGAGCAGCAAGTTCAAGAGACTTGCTGCTCACAGAATTGCTGTTTTGct  
cgagctggcgaattcc  
>CD\_NM\_001778.2:104  
CgCtGcgagtctGGtatGCGCATTCAAGGTCACCTGGTACTTCAAGAGAGTACCAAGTGACCTTGAATGCTTTTTGct  
cgagctggcgaattcc  
>CD\_NM\_001778.2:251  
CgCtGcgagtctGGtatGCCCTAAGTACTTTGAATCCAAATTTCAAGAGAATTTGGATTCAAAGTACTTAGATTTTTGct  
cgagctggcgaattcc  
>CD\_NM\_001778.2:295  
CgCtGcgagtctGGtatGCCCTCAGAGTGGCGCACTGTACTTCAAGAGAGTACAGTGCGCCACTCTGAGGATTTTTGct  
cgagctggcgaattcc  
>CD\_NM\_001778.2:597  
CgCtGcgagtctGGtatGCTTACTCCAGGTGTTATACTTGTTC AAGAGACAAGTATAACACCTGGAGTAATTTTTGct  
cgagctggcgaattcc  
>CD\_NM\_001778.2:683  
CgCtGcgagtctGGtatGACCCGGTCCTTTGGAGTAGAATTTCAAGAGAATTTCTACTCCAAAGGACCGGGCCTTTTTGct  
cgagctggcgaattcc  
>CD\_NM\_001778.2:371  
CgCtGcgagtctGGtatGCAGACTGGGAATGAGCAAGAATTTCAAGAGAATTTCTTGCTCATTCCCAGTCTTTTTGct  
cgagctggcgaattcc  
>CD\_NM\_001778.2:227  
CgCtGcgagtctGGtatGCTTGTAGAATGGGATTCAGAATTTCAAGAGATTCTGGAATCCCATTCTACAATTTTTGct  
cgagctggcgaattcc  
>CD\_NM\_001778.2:61  
CgCtGcgagtctGGtatGAGCTCTGGAATTGCTACTGCTGTTCAAGAGACAGCAGTAGCAATTCAGAGCCTTTTTGct  
cgagctggcgaattcc  
>CD\_NM\_001778.2:142  
CgCtGcgagtctGGtatGAGGCAGCAACGTGACTCTGAACTTCAAGAGAGTTTCAAGAGTACAGTTCACGTTGCTGCCGTTTTGct  
cgagctggcgaattcc  
>CD\_NM\_001778.2:38  
CgCtGcgagtctGGtatGCCAGAGGTTGGGATTCGTGTCTTCAAGAGAGACACGAATCCCAACCTCTGGATTTTTGct  
cgagctggcgaattcc  
>CD\_NM\_001778.2:250  
CgCtGcgagtctGGtatGCTCTAAGTACTTTGAATCCAAATTTCAAGAGATTTGGATTCAAAGTACTTAGATTTTTGct  
cgagctggcgaattcc  
>CD\_NM\_001778.2:284  
CgCtGcgagtctGGtatGATCAGACTTGATCCTCAGAGTGTTC AAGAGACACTCTGAGGATCAAGTCTGACTTTTTGct  
cgagctggcgaattcc  
>CD\_NM\_001778.2:55  
CgCtGcgagtctGGtatGATGTCTGGCTCTGGAATTGCTATTCAAGAGATAGCAATTCAGAGCCAGACACTTTTTGct  
cgagctggcgaattcc  
>CD\_NM\_001778.2:172

CgCctGcgagtctGGtatGAAGCCTGCCTGAGAACTACAAATTC AAGAGATTTGTAGTTCTCAGGCAGGCTCTTTTTTGct  
cgagctggcgaattcc  
>CD\_NM\_001778.2:316  
CgCctGcgagtctGGtatGAATCTCTAAGGTCAGAAAGAGTTCAAGAGACTCTTCTGGACCTTAGAGATGTTTTTGct  
cgagctggcgaattcc  
>CD\_NM\_001778.2:280  
CgCctGcgagtctGGtatGAAGGGTCAGACTTGATCCTCAGTTCAAGAGACTGAGGATCAAGTCTGACCCTGTTTTTGct  
cgagctggcgaattcc  
>CD\_NM\_001778.2:577  
CgCctGcgagtctGGtatGCACCACCCTTATGCCACATAATTTCAAGAGAATTATGTGGCATAAGGGTGGTTTTTTTGct  
cgagctggcgaattcc  
>CD\_NM\_001778.2:297  
CgCctGcgagtctGGtatGATCAGAGTGGCGCACTGTACATTTCAAGAGAATGTACAGTGCGCCACTCTGAGTTTTTGct  
cgagctggcgaattcc  
>CD\_NM\_001778.2:479  
CgCctGcgagtctGGtatGCTGAAACTGTCATGTGTGATACTTCAAGAGAGTATCACACATGACAGTTCAATTTTTGct  
cgagctggcgaattcc  
>CD\_NM\_001778.2:462  
CgCctGcgagtctGGtatGCGGATGACAACCTGTTATTTGAATTC AAGAGATTC AATAACAGTTGTCATCCATTTTTGct  
cgagctggcgaattcc  
>CD\_NM\_001778.2:602  
CgCctGcgagtctGGtatGCCAGGTGTTATACTTGCCAAGTTCAAGAGACTTGGCAAGTATAACACCTGGATTTTTTGct  
cgagctggcgaattcc  
>CD\_NM\_001778.2:464  
CgCctGcgagtctGGtatGAATGACAACCTGTTATTTGAACTTCAAGAGAGTTTCAATAACAGTTGTCATCTTTTTGct  
cgagctggcgaattcc  
>CD\_NM\_001778.2:303  
CgCctGcgagtctGGtatGATGGCGCACTGTACATCTCTAATTC AAGAGATTAGAGATGTACAGTGCGCCACTTTTTGct  
cgagctggcgaattcc  
>CD\_NM\_001778.2:621  
CgCctGcgagtctGGtatGCAGTCAGCAATTCGTGTGAGCAGTTCAAGAGACTGCTCACAGAATTGCTGACTTTTTTTGct  
cgagctggcgaattcc  
>CD\_NM\_001778.2:381  
CgCctGcgagtctGGtatGCTGAGCAAGAATGGAAGATCAATTC AAGAGATTGATCTTCCATTCTTGCTCATTTTTTGct  
cgagctggcgaattcc  
>CD\_NM\_001778.2:348  
CgCctGcgagtctGGtatGACTACATCATGAGGGTGTGAAATTC AAGAGATTCAACACCCTCATGATGTAGGTTTTTGct  
cgagctggcgaattcc  
>CD\_X68742:982  
CgCctGcgagtctGGtatGCGGCAGCTATAACCGAGGAAATTTCAAGAGAATTCCTCGGTTATAGCTGCCATTTTTGct  
cgagctggcgaattcc  
>CD\_X68742:1088  
CgCctGcgagtctGGtatGCTGGCTCTAGTCACCATTGTTATTCAAGAGATAACAATGGTACTAGAGCCAATTTTTGct  
cgagctggcgaattcc  
>CD\_X68742:1961  
CgCctGcgagtctGGtatGCTCCACGGAGAAATGGATTTAATTC AAGAGATTAAATCCATTTCTCCGTGGATTTTTTGct  
cgagctggcgaattcc  
>CD\_X68742:2043  
CgCctGcgagtctGGtatGACCGAGATGTGGCCGTAGTTAATTC AAGAGATTA ACTACGGCCACATCTCGGTTTTTTGct  
cgagctggcgaattcc  
>CD\_X68742:3289  
CgCctGcgagtctGGtatGAAGCCAAGTCAATGTTTCGCTTTTTCAAGAGAAAGCGAAACATTGACTTGGCTGTTTTTGct  
cgagctggcgaattcc  
>CD\_X68742:3346

CgCctGcgagtctGGtatGCTCCAGCTTAAATCTTACTATATTCAAGAGATATAGTAAGATTTAAGCTGGAATTTTTGct  
cgagctggcgaattcc  
>CD\_NM\_181501.1:3346  
CgCctGcgagtctGGtatGCCAGCTTAAATCTTACTATAATTCAAGAGATTATAGTAAGATTTAAGCTGGATTTTTGct  
cgagctggcgaattcc  
>CD\_NM\_181501.1:931  
CgCctGcgagtctGGtatGCTCCAAGACTGTGAAGATGAAATTTCAAGAGATTTTCATCTTCACAGTCTTGATTTTTGct  
cgagctggcgaattcc  
>CD\_NM\_181501.1:1434  
CgCctGcgagtctGGtatGCACAGGCCAGGTCATTATCTACTTCAAGAGAGTAGATAATGACCTGGCCTGTATTTTTGct  
cgagctggcgaattcc  
>CD\_NM\_181501.1:192  
CgCctGcgagtctGGtatGCGGATATACTGTTCAACAATATTTCAAGAGAATATTGTTGAACAGTATATCCATTTTTGct  
cgagctggcgaattcc  
>CD\_NM\_181501.1:2437  
CgCctGcgagtctGGtatGCACTCAGTACATGAATATATTCTTCAAGAGAGAATATATTCATGTACTGAGTTTTTTGct  
cgagctggcgaattcc  
>CD\_NM\_181501.1:2626  
CgCctGcgagtctGGtatGATGCATTATCTCCAAATCTAGTTCAAGAGACTAGATTTGGAGAATAATGCACTTTTGct  
cgagctggcgaattcc  
>CD\_NM\_181501.1:2260  
CgCctGcgagtctGGtatGCTCTCTGGAACCTCAAGAGAGAATTTCAAGAGATTTCTCTCTTGAGTTCCAGAGAATTTTTGct  
cgagctggcgaattcc  
>CD\_NM\_181501.1:892  
CgCctGcgagtctGGtatGAATGGAGAGTCTCATGACAATCTTCAAGAGAGATTGTCATGAGACTCTCCATTTTTGct  
cgagctggcgaattcc  
>CD\_NM\_181501.1:132  
CgCctGcgagtctGGtatGCTCATTCAATGTTGATGTGAAATTTCAAGAGATTTTCACATCAACATTGAATGATTTTTGct  
cgagctggcgaattcc  
>CD\_NM\_181501.1:2055  
CgCctGcgagtctGGtatGAGTAGTTAAAGTGACCATGAATTTCAAGAGAATTCATGGTCACTTTAACTACGTTTTGct  
cgagctggcgaattcc  
>CD\_NM\_181501.1:2850  
CgCctGcgagtctGGtatGCTCTGATAATGTAGTAAACATTTTCAAGAGAAATGTTTACTACATTATCAGAATTTTTGct  
cgagctggcgaattcc  
>CD\_NM\_181501.1:2537  
CgCctGcgagtctGGtatGCGCTGATTGTCCGATCCCAGAATTTCAAGAGATTTCTGGGATCGGACAATCAGCATTTTTGct  
cgagctggcgaattcc  
>CD\_NM\_181501.1:2950  
CgCctGcgagtctGGtatGAAGACAGTCCCTGAAGTTATTATTCAAGAGATAATAACTTCAGGGACTGTCTTTTTGct  
cgagctggcgaattcc  
>CD\_NM\_181501.1:667  
CgCctGcgagtctGGtatGAAGACACAGGTTGGAATTGTACTTCAAGAGAGTACAATTTCAACCTGTGTCTGTTTTGct  
cgagctggcgaattcc  
>CD\_NM\_181501.1:2773  
CgCctGcgagtctGGtatGCACACATCCTATCTCATGGAAATTTCAAGAGATTTCCATGAGATAGGATGTGTTTTTTGct  
cgagctggcgaattcc  
>CD\_NM\_181501.1:1153  
CgCctGcgagtctGGtatGAAGTCAGCAGCTTCATTTGAAATTTCAAGAGATTTCAAATGAAGCTGCTGACTGTTTTGct  
cgagctggcgaattcc  
>CD\_NM\_181501.1:3305  
CgCctGcgagtctGGtatGAGCTTATCTTGTGGAACCAACTTCAAGAGAGTTGGTTTTCCACAAGATAAGCGTTTTGct  
cgagctggcgaattcc  
>CD\_NM\_181501.1:2948



CgCctGcgagtctGGtatGCTGAGACAGTCCCTGAAGTTATTTCAAGAGAATAACTTCAGGGACTGTCTCATTTTTTgct  
cgagctggcgaattcc  
>CD\_NM\_181501.1:442  
CgCctGcgagtctGGtatGAGGCCCTTATATGCCATATAGATTTCAAGAGAATCTATAGGCATATAAGGGCCTTTTTgct  
cgagctggcgaattcc  
>CD\_NM\_181501.1:2842  
CgCctGcgagtctGGtatGAAAACCCCTTCTGATAATGTAGTTCAAGAGACTACATTATCAGAAAGGGTTCTTTTTGct  
cgagctggcgaattcc  
>CD\_NM\_181501.1:705  
CgCctGcgagtctGGtatGAACCCATGAGTTCAACCTCAATTTCAAGAGAATTGAGGTTGAACTCATGGGTCTTTTTGct  
cgagctggcgaattcc  
>CD\_NM\_181501.1:3115  
CgCctGcgagtctGGtatGCTGTCATCTTCTGAGAATGCAATTCAAGAGATTGCATTCTCAGAAGATGACAATTTTTGct  
cgagctggcgaattcc  
>CD\_NM\_181501.1:1648  
CgCctGcgagtctGGtatGAAGACAAGGTTTGAATATCAAATTCAAGAGATTTGATATTCAAACCTGTCTGTTTTTgct  
cgagctggcgaattcc  
>CD\_NM\_181501.1:1950  
CgCctGcgagtctGGtatGCGGCCAGTCTATCCACGGAGAATTCAAGAGATTCTCCGTGGATAGACTGGCCATTTTTGct  
cgagctggcgaattcc  
>CD\_NM\_181501.1:190  
CgCctGcgagtctGGtatGCTTGGATATACTGTTCAACAATTTCAAGAGAATTGTTGAACAGTATATCCAAATTTTTGct  
cgagctggcgaattcc  
>CD\_NM\_181501.1:2550  
CgCctGcgagtctGGtatGCTCCCAGAAATGATAAGTTCAACTTCAAGAGAGTTGAACTTATCATTCTGGGATTTTTTgct  
cgagctggcgaattcc  
>CD\_NM\_181501.1:2043  
CgCctGcgagtctGGtatGACGAGATGTGGCCGTAGTTAAATTTCAAGAGATTTAACTACGGCCACATCTCGGTTTTTgct  
cgagctggcgaattcc  
>CD\_NM\_002203:1283  
CgCctGcgagtctGGtatGCTGGCCATTTGATCTTTCCTAATTTCAAGAGATTAGGAAAGATCAAATGGCCATTTTTTgct  
cgagctggcgaattcc  
>CD\_NM\_002203:1352  
CgCctGcgagtctGGtatGCAGGTTACTCTGTGGCTGCAATTTCAAGAGAATTGCAGCCACAGAGTAACCTATTTTTGct  
cgagctggcgaattcc  
>CD\_NM\_002203:3080  
CgCctGcgagtctGGtatGCGGCTGGTGACATCAGTTGTAATTTCAAGAGATTACAACCTGATGTCACCAGCCTTTTTTgct  
cgagctggcgaattcc  
>CD\_NM\_002203:3329  
CgCctGcgagtctGGtatGAAGCTGCAGAAATCAACACCTATTCAAGAGATAGGTGTTGATTTCTGCAGCTGTTTTTgct  
cgagctggcgaattcc  
>CD\_NM\_002203:3424  
CgCctGcgagtctGGtatGACCGAAGTACCAACAGGAGTTATTCAAGAGATAACTCCTGTTGGTACTTCGGCTTTTTTgct  
cgagctggcgaattcc  
>CD\_NM\_002203:3437  
CgCctGcgagtctGGtatGAAGGAGTTATAATAGGAAGTATTTCAAGAGAATACTTCTATTATAACTCCTGTTTTTgct  
cgagctggcgaattcc  
>CD\_NM\_002203.2:849  
CgCctGcgagtctGGtatGAGGCGACGAAGTGCTACGAAAGTTCAAGAGACTTTCGTAGCACTTCGTGCGCCTTTTTgct  
cgagctggcgaattcc  
>CD\_NM\_002203.2:1529  
CgCctGcgagtctGGtatGCTCAGTTGATGTGGATAAAGACTTCAAGAGAGTCTTTATCCACATCAACTGAATTTTTGct  
cgagctggcgaattcc  
>CD\_NM\_002203.2:1616

CgCctGcgagtctGGtatGCAGAGTCTACCTGTTTACTATCTTCAAGAGAGATAGTAAACAGGTAGACTCTTTTTTTGct  
cgagctggcgaattcc  
>CD\_NM\_002203.2:1439  
CgCctGcgagtctGGtatGACTATATAGTGTGAATGAGAATTTCAAGAGAATTCTCATTACACTATATAGCTTTTTTGct  
cgagctggcgaattcc  
>CD\_NM\_002203.2:1065  
CgCctGcgagtctGGtatGCTCAATGTGTCTGATGAAGCAGTTCAAGAGACTGCTTCATCAGACACATTGAATTTTTTGct  
cgagctggcgaattcc  
>CD\_NM\_002203.2:1283  
CgCctGcgagtctGGtatGCGGCCATTTGATCTTTCCTAAATTTCAAGAGATTTAGGAAAGATCAAATGGCCATTTTTTGct  
cgagctggcgaattcc  
>CD\_NM\_002203.2:567  
CgCctGcgagtctGGtatGATGGTTGTGTGTGATGAATCAATTTCAAGAGATTGATTCATCACACACAACCACTTTTTGct  
cgagctggcgaattcc  
>CD\_NM\_002203.2:1445  
CgCctGcgagtctGGtatGCAGTGTGAATGAGAATGGCAATTTCAAGAGAATTGCCATTCTCATTACACTATTTTTGct  
cgagctggcgaattcc  
>CD\_NM\_002203.2:191  
CgCctGcgagtctGGtatGCGCAGTGCAGCAGTTTATAAATTTCAAGAGAATTTATAAACTGCTGCACTGCATTTTTGct  
cgagctggcgaattcc  
>CD\_NM\_002203.2:1692  
CgCctGcgagtctGGtatGCACACTCGATTTGGTTCAGCAATTTCAAGAGATTGCTGAACCAAATCGAGTGTTTTTTTGct  
cgagctggcgaattcc  
>CD\_NM\_002203.2:2369  
CgCctGcgagtctGGtatGAACTGCCAAGGTCCTCAGTATTTTTCAAGAGAAATACTGAAGACCTTGGCAGTCTTTTTTGct  
cgagctggcgaattcc  
>CD\_NM\_002203.2:2282  
CgCctGcgagtctGGtatGATCTGATGTTGTCAACTCTTTGTTCAAGAGACAAAGAGTTGACAACATCAGAGTTTTTGct  
cgagctggcgaattcc  
>CD\_NM\_002203.2:2397  
CgCctGcgagtctGGtatGAACAAAGACTGTGGTGAGGATGTTCAAGAGACATCCTCACCACAGTCTTGTGTTTTTGct  
cgagctggcgaattcc  
>CD\_NM\_002203.2:3283  
CgCctGcgagtctGGtatGCCGGGACTTTCGCATCATCAACTTTCAAGAGAGTTGATGATGCGAAAGTCCCGTTTTTTGct  
cgagctggcgaattcc  
>CD\_NM\_002203.2:2804  
CgCctGcgagtctGGtatGAGCTGATAATTTGGTCAACCTCTTCAAGAGAGAGGTTGACCAAATTATCAGCCTTTTTTGct  
cgagctggcgaattcc  
>CD\_NM\_002203.2:2759  
CgCctGcgagtctGGtatGATCTCTCAGTTTCCAAGCCTTATTCAAGAGATAAGGCTTGGAAACTGAGAGACTTTTTTGct  
cgagctggcgaattcc  
>CD\_NM\_002203.2:2429  
CgCctGcgagtctGGtatGCTCTGATCTAGTCCTAGATGTCTTCAAGAGAGACATCTAGGACTAGATCAGAATTTTTTGct  
cgagctggcgaattcc  
>CD\_NM\_002203.2:3080  
CgCctGcgagtctGGtatGAGCTGGTGACATCAGTTGTAATTTCAAGAGAATTACAACCTGATGTCACCAGCCTTTTTTGct  
cgagctggcgaattcc  
>CD\_NM\_002203.2:792  
CgCctGcgagtctGGtatGCACACATTCGGAGCAATTTCAATTTCAAGAGAATTGAATTGCTCCGAATGTGTTTTTTGct  
cgagctggcgaattcc  
>CD\_NM\_002203.2:968  
CgCctGcgagtctGGtatGCGCAGTCTTGGGTACTTAACTTTCAAGAGAGTTTAAGTACCCAAGAACTGCTTTTTTTGct  
cgagctggcgaattcc  
>CD\_NM\_002203.2:2989

CgCtGcgagtctGGtatGAAGTAAGCATGGCAACTGTAATTTCAAGAGAATTACAGTTGCCATGCTTACTGTTTTTGct  
cgagctggcgaattcc  
>CD\_NM\_002203.2:1356  
CgCtGcgagtctGGtatGCACTCTGTGGCTGCAATTTCTATTCAAGAGATAGAAATTGCAGCCACAGAGTATTTTTGct  
cgagctggcgaattcc  
>CD\_NM\_002203.2:545  
CgCtGcgagtctGGtatGATGCCCTTCCCTCATAGATGTTTTCAAGAGAAACATCTATGAGGGAAGGGCAGTTTTTGct  
cgagctggcgaattcc  
>CD\_NM\_002203.2:2216  
CgCtGcgagtctGGtatGACAGAAGAATATGGTAGTAAATTTCAAGAGAATTTACTACCATATTCTTCTGCTTTTTTGct  
cgagctggcgaattcc  
>CD\_NM\_002203.2:798  
CgCtGcgagtctGGtatGCTCGGAGCAATCAATATGCAATTCAGAGATTGCATATTGAATTGCTCCGAATTTTTGct  
cgagctggcgaattcc  
>CD\_NM\_002203.2:165  
CgCtGcgagtctGGtatGAGTCCTTCAAGTGAACAGTTTGTTCAGAGACAACTGTTCACTTGAAGGACTTTTTGct  
cgagctggcgaattcc  
>CD\_NM\_002203.2:565  
CgCtGcgagtctGGtatGCTGTGGTTGTGTGTGATGAATCTTCAAGAGAGATTCATCACACACAACCACAATTTTTGct  
cgagctggcgaattcc  
>CD\_NM\_002204:384  
CgCtGcgagtctGGtatGCGCGGATGAACATCACAGTGAATTCAGAGATTCACTGTGATGTTTCATCCGCTTTTTTGct  
cgagctggcgaattcc  
>CD\_NM\_002204:761  
CgCtGcgagtctGGtatGCAGGAGTGGGACTTATCTGAGTTTTCAAGAGAACTCAGATAAGTCCCCTTTTTTGct  
cgagctggcgaattcc  
>CD\_NM\_002204:766  
CgCtGcgagtctGGtatGATGGGACTTATCTGAGTATAGTTTTCAAGAGAACTATACTCAGATAAGTCCCCTTTTTTGct  
cgagctggcgaattcc  
>CD\_NM\_002204:1211  
CgCtGcgagtctGGtatGCACCAGGATGGATTTCAAGGATATTCAGAGATATCCTGAAATCCATCCTGGTTTTTTGct  
cgagctggcgaattcc  
>CD\_NM\_002204:1347  
CgCtGcgagtctGGtatGATGGGTTGGCCACCTTCGGCTATTCAAGAGATAGCCGAAGGTGGCCAACCCAGTTTTTGct  
cgagctggcgaattcc  
>CD\_NM\_002204:767  
CgCtGcgagtctGGtatGCGGGACTTATCTGAGTATAGTTTTCAAGAGAACTATACTCAGATAAGTCCCCTTTTTTGct  
cgagctggcgaattcc  
>CD\_NM\_002204:383  
CgCtGcgagtctGGtatGAAGCGGATGAACATCACAGTGAATTCAGAGATTCACTGTGATGTTTCATCCGCTTTTTTGct  
cgagctggcgaattcc  
>CD\_NM\_002204.1:1092  
CgCtGcgagtctGGtatGCGCCATCTATGTCCTTCATGAACTTCAAGAGAGTTCATGAAGACATAGATGGCATTTTTTGct  
cgagctggcgaattcc  
>CD\_NM\_002204.1:2358  
CgCtGcgagtctGGtatGATCGCTTAGCATGGTAAATCACTTCAAGAGAGTGAATTTACCATGCTAAGCGAGTTTTTGct  
cgagctggcgaattcc  
>CD\_NM\_002204.1:2322  
CgCtGcgagtctGGtatGAATCCTCACTCTGCTGGTGGACTTCAAGAGAGTCCACCAGCAGAGTGAGGATTTTTTGct  
cgagctggcgaattcc  
>CD\_NM\_002204.1:411  
CgCtGcgagtctGGtatGACCTGGCCATCACATTATTGAGTTCAAGAGACTCAATAATGTGATGGCCAGGGTTTTTGct  
cgagctggcgaattcc  
>CD\_NM\_002204.1:1869

CgCtGcgagtctGGtatGAGCACAGGCTCTGGAGAACCCTTCAAGAGAGTGGTTCTCCAGAGCCTGTGCCTTTTTTGct  
cgagctggcgaattcc  
>CD\_NM\_002204.1:2796  
CgCtGcgagtctGGtatGCGCCACTGTGTGGCTAGAGTTCAAGAGACTCTAGCCACACACAGTGGGCATTTTTTGct  
cgagctggcgaattcc  
>CD\_NM\_002204.1:1614  
CgCtGcgagtctGGtatGAGCCTACACTCTGGAGGCTGACTTCAAGAGAGTCAGCCTCCAGAGTGTAGGCCTTTTTTGct  
cgagctggcgaattcc  
>CD\_NM\_002204.1:1533  
CgCtGcgagtctGGtatGAACCTCTTGTGTGCAAGTGGAGTTCAAGAGACTCCACTTGCACACAAGAGGTGTTTTTGct  
cgagctggcgaattcc  
>CD\_NM\_002204.1:719  
CgCtGcgagtctGGtatGATGCCTACAACCTGGAAAGGAAATTCAGAGATTTCCCTTCCAGTTGTAGGCATTTTTTGct  
cgagctggcgaattcc  
>CD\_NM\_002204.1:414  
CgCtGcgagtctGGtatGCGGCCATCACATTATTGAGGACTTCAAGAGAGTCCTCAATAATGTGATGGCCATTTTTTGct  
cgagctggcgaattcc  
>CD\_NM\_002204.1:240  
CgCtGcgagtctGGtatGAGCCCTCCATCGGCAGACAGAGTTCAAGAGACTCTGTCTGCCGATGGAGGGCGTTTTTGct  
cgagctggcgaattcc  
>CD\_NM\_002204.1:1743  
CgCtGcgagtctGGtatGAATGGACAACCTCCGTGACAAATTCAGAGATTTGTACGGAGGTTGTCCATTTTTTGct  
cgagctggcgaattcc  
>CD\_NM\_002204.1:720  
CgCtGcgagtctGGtatGCGCCTACAACCTGGAAAGGAACTTCAAGAGAGTTTCCCTTCCAGTTGTAGGCATTTTTTGct  
cgagctggcgaattcc  
>CD\_NM\_002204.1:2961  
CgCtGcgagtctGGtatGAACCATCAACATGGAGAACAAGTTCAAGAGACTTGTCTCCATGTTGATGGTGTTTTTTGct  
cgagctggcgaattcc  
>CD\_NM\_002204.1:2798  
CgCtGcgagtctGGtatGACCACTGTGTGGCTAGAGTGTTCAGAGACACTCTAGCCACACACAGTGGGTTTTTGct  
cgagctggcgaattcc  
>CD\_NM\_002204.1:1168  
CgCtGcgagtctGGtatGAGCTCTGCCTTTGGTTTATCTGTTCAAGAGACAGATAAACCAAAGGCAGAGCCTTTTTTGct  
cgagctggcgaattcc  
>CD\_NM\_002204.1:2988  
CgCtGcgagtctGGtatGATGGTTCTCTGTGGACATTGACTTCAAGAGAGTCAATGTCCACAGAGAACCCTTTTTTGct  
cgagctggcgaattcc  
>CD\_NM\_002204.1:213  
CgCtGcgagtctGGtatGACCGGGCAGCCTCTTCGGCTACTTCAAGAGAGTAGCCGAAGAGGCTGCCCGGGTTTTTGct  
cgagctggcgaattcc  
>CD\_NM\_002204.1:1368  
CgCtGcgagtctGGtatGCTCCCTCAGTGGGCAGATGGATTTCAAGAGAATCCATCTGCCCACTGAGGGAATTTTTTGct  
cgagctggcgaattcc  
>CD\_NM\_002204.1:3201  
CgCtGcgagtctGGtatGAACAGAGAGGCTGACCGACGACTTCAAGAGAGTCGTCGGTCAGCCTCTCTGTCTTTTTTGct  
cgagctggcgaattcc  
>CD\_NM\_002204.1:354  
CgCtGcgagtctGGtatGACCACTCACTGCCACAAGGATTTCAAGAGAATCCTTGTGGGCAGTGTGGTTTTTGct  
cgagctggcgaattcc  
>CD\_NM\_002204.1:2613  
CgCtGcgagtctGGtatGCCACCTGGAGACCTTATCAACTTCAAGAGAGTTGATAAGGTCTCCAGGTGGTTTTTGct  
cgagctggcgaattcc  
>CD\_NM\_002204.1:444

CgCctGcgagtctGGtatGCGGAGTACTGTGGCCAGCCAGTTCAAGAGACTGGCTGGCCACAGTCACTCCATTTTTGct  
cgagctggcgaattcc  
>CD\_NM\_002204.1:2904  
CgCctGcgagtctGGtatGATTTGACCGAGTCCGGGTAAATTTCAAGAGAAATTTACCCGGACTCGGTCAAAGTTTTTgct  
cgagctggcgaattcc  
>CD\_NM\_002204.1:3165  
CgCctGcgagtctGGtatGAAGGCAGAAGGCGGAGATGAAGTTCAAGAGACTTCATCTCCGCCTTCTGCCTCTTTTTGct  
cgagctggcgaattcc  
>CD\_NM\_002204.1:905  
CgCctGcgagtctGGtatGCGGGCGCGGTGTTCTTGCTGAGTTCAAGAGACTCAGCAAGAACACCGCGCCCATTTTTGct  
cgagctggcgaattcc  
>CD\_NM\_000885:1589  
CgCctGcgagtctGGtatGAAGCAGATTGGTAAGGCATATATTCAAGAGATATATGCCTTACCAATCTGCTCTTTTTGct  
cgagctggcgaattcc  
>CD\_NM\_000885:2206  
CgCctGcgagtctGGtatGCACGAAATTTGACTGTGTTGAATTCAAGAGATTCAACACAGTCAAATTTGTTTTTTTTGct  
cgagctggcgaattcc  
>CD\_NM\_000885:2511  
CgCctGcgagtctGGtatGCTGGTCCATGTCATCAGTAATTCAAGAGATTACTGATGACATGAGGACCAATTTTTGct  
cgagctggcgaattcc  
>CD\_NM\_000885:2800  
CgCctGcgagtctGGtatGCCCCGTGGGTCTTTATTTTCATTTTTCAAGAGAAATGAAATAAAGACCCACGGTTTTTTTTGct  
cgagctggcgaattcc  
>CD\_NM\_000885:3438  
CgCctGcgagtctGGtatGCAGCTGATCCACATTTGTTTAAATTTCAAGAGATTTAAACAATGTGGATCAGCTTTTTTTTTGct  
cgagctggcgaattcc  
>CD\_NM\_000885:3681  
CgCctGcgagtctGGtatGCACGTTATTTACCATAGTGATTTCAAGAGAATCACTATGGTGAAATAACGTTTTTTTTGct  
cgagctggcgaattcc  
>CD\_NM\_000885:3220  
CgCctGcgagtctGGtatGCCCCAATGTTAGTGTGGAAATATTCAAGAGATATTTCCACACTAACATTGGGATTTTTGct  
cgagctggcgaattcc  
>CD\_NM\_000885.4:3737  
CgCctGcgagtctGGtatGCTCTGTTGATCTCATATGTTATTTCAAGAGAATAACATATGAGATCAACAGAATTTTTGct  
cgagctggcgaattcc  
>CD\_NM\_000885.4:2511  
CgCctGcgagtctGGtatGCGGTCCATGTCATCAGTAAATTTCAAGAGATTTACTGATGACATGAGGACCATTTTTGct  
cgagctggcgaattcc  
>CD\_NM\_000885.4:2054  
CgCctGcgagtctGGtatGAACAGTCTATATCAGGACAAATTTCAAGAGAAATTTGTCCTGATATAGACTGTCTTTTTGct  
cgagctggcgaattcc  
>CD\_NM\_000885.4:3090  
CgCctGcgagtctGGtatGAACTGTTTCATGGGTTTGTAAACTTTCAAGAGAGTTTACAAACCCATGAACAGTCTTTTTGct  
cgagctggcgaattcc  
>CD\_NM\_000885.4:2256  
CgCctGcgagtctGGtatGCACACTTTGTTTCTCATATAAGTTCAAGAGACTTATATGAGAAACAAAGTTTTTTTTTGct  
cgagctggcgaattcc  
>CD\_NM\_000885.4:1641  
CgCctGcgagtctGGtatGATTACATGAAATGAAAGGTAAATTTCAAGAGATTTACCTTTTCATTTTCATGTAAGTTTTTgct  
cgagctggcgaattcc  
>CD\_NM\_000885.4:3046  
CgCctGcgagtctGGtatGCGCAGAGTACTGTAGCAATACTTTCAAGAGAGTATTGCTACAGTCACTCTGCTTTTTTgct  
cgagctggcgaattcc  
>CD\_NM\_000885.4:2319

CgCctGcgagtctGGtatGAAGTTTGGATGTGAACAGAAAGTTCAAGAGACTTCTGTTTACATCCAAACTCTTTTTTGct  
cgagctggcgaattcc  
>CD\_NM\_000885.4:2735  
CgCctGcgagtctGGtatGCGTTGAATGTGTCCTTGTTTAATTTCAAGAGATTAAACAAGGACACATTCAACATTTTTTGct  
cgagctggcgaattcc  
>CD\_NM\_000885.4:1773  
CgCctGcgagtctGGtatGCAGAGTGTGTTGTGTACATCAACTTCAAGAGAGTTGATGTACACAAACACTCTTTTTTTGct  
cgagctggcgaattcc  
>CD\_NM\_000885.4:3267  
CgCctGcgagtctGGtatGCACTGATAAGCTGTTCAACATTTTTCAAGAGAAATGTTGAACAGCTTATCAGTTTTTTTTGct  
cgagctggcgaattcc  
>CD\_NM\_000885.4:3408  
CgCctGcgagtctGGtatGAACTGATAAGAGGCTATTGTACTTCAAGAGAGTACAATAGCCTCTTATCAGTCTTTTTTGct  
cgagctggcgaattcc  
>CD\_NM\_000885.4:2183  
CgCctGcgagtctGGtatGACCACCTGAGTCAGTAAATAGTTCAAGAGACTATTTACTGACTCAGGGTGGCTTTTTTGct  
cgagctggcgaattcc  
>CD\_NM\_000885.4:2359  
CgCctGcgagtctGGtatGCTCTATTTCTCTTCTAATGGAATTTCAAGAGATTCATTAGAAGAGAAATAGAATTTTTTGct  
cgagctggcgaattcc  
>CD\_NM\_000885.4:1695  
CgCctGcgagtctGGtatGCGCTGTGGACCTCAATGCAGATTTCAAGAGAATCTGCATTGAGGTCCACAGCATTTTTTGct  
cgagctggcgaattcc  
>CD\_NM\_000885.4:3501  
CgCctGcgagtctGGtatGAAGTGTTCATATCCAACCTGGAATTTCAAGAGATTCAGTTGGATATGAACACTGTTTTTTGct  
cgagctggcgaattcc  
>CD\_NM\_000885.4:2338  
CgCctGcgagtctGGtatGCAGGCAGAGTCTCCACCAAGATTTCAAGAGAATCTTGGTGGAGACTCTGCCTTTTTTTTGct  
cgagctggcgaattcc  
>CD\_NM\_000885.4:3825  
CgCctGcgagtctGGtatGCTGGAGTTATATCAACAGTAAATTTCAAGAGATTTACTGTTGATATAACTCCAATTTTTTGct  
cgagctggcgaattcc  
>CD\_NM\_000885.4:873  
CgCctGcgagtctGGtatGAACTGAGAGCGCGCTGCTTTACTTCAAGAGAGTAAAGCAGCGCGCTCTCAGTGTTTTTTGct  
cgagctggcgaattcc  
>CD\_NM\_000885.4:2843  
CgCctGcgagtctGGtatGCGCAAATAAACTGTGAAGTCACTTCAAGAGAGTGACTTCACAGTTTATTTGCTTTTTTTGct  
cgagctggcgaattcc  
>CD\_NM\_000885.4:1945  
CgCctGcgagtctGGtatGAACTTGCAAGGTGCTATTTATATTCAAGAGATATAAATAGCACCTTGCAAGTCTTTTTTGct  
cgagctggcgaattcc  
>CD\_NM\_000885.4:2355  
CgCctGcgagtctGGtatGCAGATTCTATTTCTCTTCTAATTTCAAGAGAATTAGAAGAGAAATAGAATCTTTTTTTGct  
cgagctggcgaattcc  
>CD\_NM\_000885.4:2779  
CgCctGcgagtctGGtatGCCGACTCTACATGTCAAACACTTCAAGAGAGTAGTTTGACATGTAGAGTCGTTTTTTGct  
cgagctggcgaattcc  
>CD\_NM\_000885.4:1846  
CgCctGcgagtctGGtatGAACAAATATGCTGCAAGATTTGTTCAAGAGACAAATCTTGCAGCATATTTGCTTTTTTTGct  
cgagctggcgaattcc  
>CD\_NM\_000885.4:2185  
CgCctGcgagtctGGtatGAACCTGAGTCAGTAAATAGAATTTCAAGAGATTCATTTACTGACTCAGGGTGTTTTTTGct  
cgagctggcgaattcc  
>CD\_NM\_000885.4:1345

CgCtGcgagtctGGtatGCTTGCATCATGTCAAGCTGGAATTCAAGAGATTCCAGCTTGACATGATGCAAATTTTTGct  
cgagctggcgaattcc  
>CD\_NM\_002205:780  
CgCtGcgagtctGGtatGAAGGAGCAGATTGCAGAATCTTTTCAAGAGAAAGATTCTGCAATCTGCTCCTGTTTTGct  
cgagctggcgaattcc  
>CD\_NM\_002205:966  
CgCtGcgagtctGGtatGCACGGCTATGTCACCATCCTTATTCAAGAGATAAGGATGGTGACATAGCCGTATTTTTGct  
cgagctggcgaattcc  
>CD\_NM\_002205:1329  
CgCtGcgagtctGGtatGAAGCAGGGAGTAGTGTGTATTTC AAGAGAATACAAACTACTCCCTGCTGTTTTGct  
cgagctggcgaattcc  
>CD\_NM\_002205:1453  
CgCtGcgagtctGGtatGAAGGCCGAGACCTGGATGGCAATTCAAGAGATTGCCATCCAGGTCTCGGCCTTTTTGct  
cgagctggcgaattcc  
>CD\_NM\_002205:1836  
CgCtGcgagtctGGtatGCACCTCAGGAACGAGTCAGAATTTCAAGAGAATTCTGACTCGTTCCTGAGGTATTTTTGct  
cgagctggcgaattcc  
>CD\_NM\_002205:2955  
CgCtGcgagtctGGtatGACCCTGAAGATGCCCTACCGAATTCAAGAGATTGGTAGGGCATCTTCAGGGCTTTTTGct  
cgagctggcgaattcc  
>CD\_NM\_002205:3054  
CgCtGcgagtctGGtatGAGCGTCCCCTGTGGATCATCATTCAAGAGATGATGATCCACAGTGGGACGCCTTTTTGct  
cgagctggcgaattcc  
>CD\_NM\_002205:2661  
CgCtGcgagtctGGtatGCCGGGACTCAACTGCACCACCATTCAAGAGATGGTGGTGCAGTTGAGTCCCCTTTTTGct  
cgagctggcgaattcc  
>CD\_NM\_002205:967  
CgCtGcgagtctGGtatGCCGGCTATGTCACCATCCTTAATTCAAGAGATTAAGGATGGTGACATAGCCGTTTTTGct  
cgagctggcgaattcc  
>CD\_NM\_002205.2:1847  
CgCtGcgagtctGGtatGAAGTCAGAAATTCGAGACAAACTTCAAGAGAGTTTGTCTCGAAATTCGACTCTTTTTGct  
cgagctggcgaattcc  
>CD\_NM\_002205.2:395  
CgCtGcgagtctGGtatGACCATTGAATTTGACAGCAAAGTTCAAGAGACTTTGCTGTCAAATTCATGGGTTTTGct  
cgagctggcgaattcc  
>CD\_NM\_002205.2:887  
CgCtGcgagtctGGtatGCACTCTGTGGCTGTTGGTGAATTTCAAGAGAATTCACCAACAGCCACAGAGTATTTTTGct  
cgagctggcgaattcc  
>CD\_NM\_002205.2:2933  
CgCtGcgagtctGGtatGAAGTGTGAGGCTGTGTACAAAGTTCAAGAGACTTTGTACACAGCCTCACACTGTTTTGct  
cgagctggcgaattcc  
>CD\_NM\_002205.2:1777  
CgCtGcgagtctGGtatGAACCCAGACCTGCTCATCCAGTTCAAGAGACTGGATGAGCAGGGTCTGGGTCTTTTTGct  
cgagctggcgaattcc  
>CD\_NM\_002205.2:3054  
CgCtGcgagtctGGtatGACGTCCCCTGTGGATCATCATTTC AAGAGAATGATGATCCACAGTGGGACGCCTTTTTGct  
cgagctggcgaattcc  
>CD\_NM\_002205.2:2629  
CgCtGcgagtctGGtatGCGGTCAGCAGCTCCTATATGTGTTCAAGAGACACATATAGGAGCTGCTGACCTTTTTGct  
cgagctggcgaattcc  
>CD\_NM\_002205.2:1214  
CgCtGcgagtctGGtatGATCACTGGCCATGATGAGTTTGTTC AAGAGACAACTCATCATGGCCAGTGAGTTTTGct  
cgagctggcgaattcc  
>CD\_NM\_002205.2:1210

CgCtGcgagtctGGtatGCACCTCACTGGCCATGATGAGTTCAAGAGACTCATCATGGCCAGTGAGGGTATTTTTGct  
cgagctggcgaattcc  
>CD\_NM\_002205.2:2920  
CgCtGcgagtctGGtatGACCATTTAGCTGCAGTGTGAGTTCAAGAGACTCACACTGCAGGCTAAATGGCTTTTTGct  
cgagctggcgaattcc  
>CD\_NM\_002205.2:957  
CgCtGcgagtctGGtatGCCCTCACTTACGGCTATGTCACTTCAAGAGAGTGACATAGCCGTAAGTGAGGTTTTTTGct  
cgagctggcgaattcc  
>CD\_NM\_002205.2:2083  
CgCtGcgagtctGGtatGCGCCCTGAACCTCACTTTCCATTTCAAGAGAATGGAAAGTGAGGTTTCAGGGCATTTTTGct  
cgagctggcgaattcc  
>CD\_NM\_002205.2:2955  
CgCtGcgagtctGGtatGACCTGAAGATGCCCTACCGAATTTCAAGAGAATTCGGTAGGGCATCTTCAGGGTTTTTTGct  
cgagctggcgaattcc  
>CD\_NM\_002205.2:2587  
CgCtGcgagtctGGtatGCAGCCAGGGTGTGCTGGAACCTTCAAGAGAGAGTTCAGCACACCTGGCTATTTTTGct  
cgagctggcgaattcc  
>CD\_NM\_002205.2:775  
CgCtGcgagtctGGtatGAACTCAGGAGCAGATTGCAGAATTTCAAGAGATTCTGCAATCTGCTCCTGAGTGTTTTTGct  
cgagctggcgaattcc  
>CD\_NM\_002205.2:1646  
CgCtGcgagtctGGtatGCTCTGCCCTCAATGCTTCTGGAATTTCAAGAGATTCCAGAAGCATTGAGGCAGAATTTTTGct  
cgagctggcgaattcc  
>CD\_NM\_002205.2:604  
CgCtGcgagtctGGtatGAACAGATAACTTCACCCGAATTTTCAAGAGAAATTCGGGTGAAGTTATCTGTGTTTTTTGct  
cgagctggcgaattcc  
>CD\_NM\_002205.2:636  
CgCtGcgagtctGGtatGAACCTGCCGCTCAGATTTCAAGAGACTGAAATCTGAGCGGCAGGGTGTTTTTGct  
cgagctggcgaattcc  
>CD\_NM\_002205.2:1687  
CgCtGcgagtctGGtatGCGGTTTACAGTGGAACCTCAGTTCAAGAGACTGAAGTTCCACTGTGAAACCATTTTTGct  
cgagctggcgaattcc  
>CD\_NM\_002205.2:2159  
CgCtGcgagtctGGtatGACTCCAGAGCTGAGTACTCAGTTCAAGAGACTGAGTACTCAGCCTCTGGAGTTTTTTGct  
cgagctggcgaattcc  
>CD\_NM\_002205.2:1472  
CgCtGcgagtctGGtatGCATGGATATCCTGATCTGATTGTTCAAGAGACAATCAGATCAGGATATCCATTTTTTTGct  
cgagctggcgaattcc  
>CD\_NM\_002205.2:2857  
CgCtGcgagtctGGtatGAAGCCAAAGTCTGCAGTTGCATTTCAAGAGAATGCAACTGCAGACTTTGGCTTTTTTTGct  
cgagctggcgaattcc  
>CD\_NM\_002205.2:1227  
CgCtGcgagtctGGtatGCTGAGTTTGCCGATTTGGCAGTTCAAGAGACTGCCAAATCGGCCAAACTCATTTTTTTGct  
cgagctggcgaattcc  
>CD\_NM\_002205.2:993  
CgCtGcgagtctGGtatGAAGACATTCGATCCCTCTACAATTTCAAGAGATTGTAGAGGGATCGAATGTCTGTTTTTTGct  
cgagctggcgaattcc  
>CD\_NM\_000210:1212  
CgCtGcgagtctGGtatGCACCAGCAAGGCAGATGGAATATTTCAAGAGATATCCATCTGCCTTGCTGGTTTTTTTTGct  
cgagctggcgaattcc  
>CD\_NM\_000210:1506  
CgCtGcgagtctGGtatGCCCTCTCAGATTCAGTAACTATTCAAGAGATAGTTACTGAATCTGAGAGGGATTTTTTTGct  
cgagctggcgaattcc  
>CD\_NM\_000210:3321



CgCctGcgagtctGGtatGCTCCATGCTCAGCCATCTGATATTCAAGAGATATCAGATGGCTGAGCATGGATTTTTTGct  
cgagctggcgaattcc  
>CD\_NM\_000210:1540  
CgCctGcgagtctGGtatGAGCCTGTGATTAATATTCAAGAGATTCTGAATATTAATCACAGGCCTTTTTTGct  
cgagctggcgaattcc  
>CD\_NM\_000210:2976  
CgCctGcgagtctGGtatGATGGACAGCAAGGCGTCTCTTATTCAAGAGATAAGAGACGCCTTGCTGTCCAGTTTTTGct  
cgagctggcgaattcc  
>CD\_NM\_000210:937  
CgCctGcgagtctGGtatGAAGGGAAAGGTATTGTTTCTAATTCAAGAGATTAGAAACAATACCTTTCCCTGTTTTTGct  
cgagctggcgaattcc  
>CD\_NM\_000210.1:1565  
CgCctGcgagtctGGtatGCTCACAGTAACTCCTAACAGAATTCAAGAGATTCTGTTAGGAGTTACTGTGATTTTTTGct  
cgagctggcgaattcc  
>CD\_NM\_000210.1:1192  
CgCctGcgagtctGGtatGCGCAGTGTATGTCTACATGAACTTCAAGAGAGTTCATGTAGACATACTGCATTTTTTGct  
cgagctggcgaattcc  
>CD\_NM\_000210.1:616  
CgCctGcgagtctGGtatGAAGTCAGAACTCAGGATTGAATTCAAGAGATTCAATCCTGAGATTCTGACTTTTTTGct  
cgagctggcgaattcc  
>CD\_NM\_000210.1:1534  
CgCctGcgagtctGGtatGCTCCCGCCTGTGATTAATATTTTTCAAGAGAAATATTAATCACAGGCCGGGATTTTTTGct  
cgagctggcgaattcc  
>CD\_NM\_000210.1:556  
CgCctGcgagtctGGtatGCAGGCAGCATGTTAATACGAAGTTCAAGAGACTTCGTATTAACATGCTGCCTTTTTTTGct  
cgagctggcgaattcc  
>CD\_NM\_000210.1:2347  
CgCctGcgagtctGGtatGCGCTGACTGTGAGCTCGGAAATTTCAAGAGAATTTCCGAGCTCACAGTCAGCTTTTTTGct  
cgagctggcgaattcc  
>CD\_NM\_000210.1:1408  
CgCctGcgagtctGGtatGCACACAGGTTCTCAAGGTATATTCAAGAGATATACCCTTGAGAACCTGTGTTTTTTTGct  
cgagctggcgaattcc  
>CD\_NM\_000210.1:1781  
CgCctGcgagtctGGtatGACCAAATATACTCAAGAACTAATTCAAGAGATTAGTTCCTTGAGTATATTTGGGTTTTTGct  
cgagctggcgaattcc  
>CD\_NM\_000210.1:1225  
CgCctGcgagtctGGtatGCTGGAATAATGTGAAGCCAATTTTTCAAGAGAAATTGGCTTACATTATCCATTTTTTGct  
cgagctggcgaattcc  
>CD\_NM\_000210.1:601  
CgCctGcgagtctGGtatGACGGTGTATATGTCCTGAGTCAGTTCAAGAGACTGACTCAGGACATAACACCGCTTTTTTGct  
cgagctggcgaattcc  
>CD\_NM\_000210.1:1673  
CgCctGcgagtctGGtatGACTGGTTATAATCCTTCAATATTTCAAGAGAATATTGAAGGATTATAACCAGCTTTTTTGct  
cgagctggcgaattcc  
>CD\_NM\_000210.1:1506  
CgCctGcgagtctGGtatGACCTCTCAGATTCAGTAACTATTTCAAGAGAATAGTTACTGAATCTGAGAGGGTTTTTGct  
cgagctggcgaattcc  
>CD\_NM\_000210.1:1852  
CgCctGcgagtctGGtatGCCAGGATAATATCAGAGATAAATTCAAGAGATTTATCTCTGATATTATCCTGTTTTTTTGct  
cgagctggcgaattcc  
>CD\_NM\_000210.1:865  
CgCctGcgagtctGGtatGCGGAGAGACTGAGCATGATGAATTCAAGAGATTCATCATGCTCAGTCTCTCCATTTTTTGct  
cgagctggcgaattcc  
>CD\_NM\_000210.1:3259

CgCtGcgagtctGGtatGATGTGGTTTCTTCAAGAGAAATTTCAAGAGAATTTCTCTTGAAGAAACCACACTTTTTGct  
cgagctggcgaattcc  
>CD\_NM\_000210.1:1864  
CgCtGcgagtctGGtatGAAGAGATAAACTGCGTCCCATTTTCAAGAGAAATGGGACGCAGTTTATCTCTGTTTTGct  
cgagctggcgaattcc  
>CD\_NM\_000210.1:431  
CgCtGcgagtctGGtatGAGGATCGAGTTTGATAACGATGTTCAAGAGACATCGTTATCAAACCTCGATCCGTTTTGct  
cgagctggcgaattcc  
>CD\_NM\_000210.1:2976  
CgCtGcgagtctGGtatGCGGACAGCAAGGCGTCTTATTTCAAGAGAATAAGAGACGCCTTGCTGTCCATTTTTGct  
cgagctggcgaattcc  
>CD\_NM\_000210.1:938  
CgCtGcgagtctGGtatGAGGAAAGGTATTGTTTCTAAAGTTCAAGAGACTTTAGAAACAATACCTTCCCTTTTTGct  
cgagctggcgaattcc  
>CD\_NM\_000210.1:869  
CgCtGcgagtctGGtatGAAGACTGAGCATGATGAAAGTCTTCAAGAGAGACTTTCATCATGCTCAGTCTTTTTGct  
cgagctggcgaattcc  
>CD\_NM\_000210.1:895  
CgCtGcgagtctGGtatGCCCTGTTCTGCTAACAGTTACTTCAAGAGAGTAAGTGTAGCAGGAACAGGATTTTTGct  
cgagctggcgaattcc  
>CD\_NM\_000210.1:1186  
CgCtGcgagtctGGtatGCGGAGGTGCAGTGTATGTCTACTTCAAGAGAGTAGACATACTGCACCTCCATTTTTGct  
cgagctggcgaattcc  
>CD\_NM\_000210.1:1373  
CgCtGcgagtctGGtatGCATCATGGATCTGCAAATGGAATTTCAAGAGATTCATTTGCAGATCCATGATATTTTTGct  
cgagctggcgaattcc  
>CD\_NM\_000210.1:1984  
CgCtGcgagtctGGtatGAACAGCTCATATTGATGTTCACTTCAAGAGAGTGAACATCAATATGAGCTGTCTTTTTGct  
cgagctggcgaattcc  
>CD\_NM\_000210.1:1036  
CgCtGcgagtctGGtatGATCTGCACATCTCCTCCCTGAGTTCAAGAGACTCAGGGAGGAGATGTGCAGACTTTTTGct  
cgagctggcgaattcc  
>CD\_NM\_000210.1:2929  
CgCtGcgagtctGGtatGCAGCGTGAACGTGAAGTGTGTGTTCAAGAGACACACAGTTCACGTTACGCTATTTTTGct  
cgagctggcgaattcc  
>CD\_NM\_000210.1:2261  
CgCtGcgagtctGGtatGAACACTTTAACCTATTCTGCATTTCAAGAGAATGCAGAATAGGTTAAAGTGTCTTTTTGct  
cgagctggcgaattcc  
>CD\_NM\_002162:322  
CgCtGcgagtctGGtatGCCCCAGATAACAGGCTCCTCTATTCAAGAGATAGAGGAGCCTGTTATCTGGGATTTTTGct  
cgagctggcgaattcc  
>CD\_NM\_002162:928  
CgCtGcgagtctGGtatGACCCGGGAGAACTTGACGGTCTTTCAAGAGAAGACCGTCAAGTTCTCCGGGCTTTTTGct  
cgagctggcgaattcc  
>CD\_NM\_002162:1082  
CgCtGcgagtctGGtatGCGCCAGCTCAACTTCAGCTAAATTTCAAGAGATTTAGCTGAAGTTGAGCTGGCTTTTTGct  
cgagctggcgaattcc  
>CD\_NM\_002162:1159  
CgCtGcgagtctGGtatGAACGGCGAGTTCTTGACAGGATTTCAAGAGATCCTGTGCAAGAACTCGCCGCTTTTTGct  
cgagctggcgaattcc  
>CD\_NM\_002162:1429  
CgCtGcgagtctGGtatGCCCTGGTCGTGGTGTGACATTTCAAGAGATGTCCATCACCACGACCAGGGTTTTGct  
cgagctggcgaattcc  
>CD\_NM\_002162:1196

CgCtGcgagtctGGtatGCGCGAGTCTGTATGGTCCCAATTCAAGAGATTGGGACCATACAGGACTCGCATTTTTTGct  
cgagctggcgaattcc  
>CD\_NM\_002162:226  
CgCtGcgagtctGGtatGCAGGAGCTGGTGGCCAGTGGCATTCAAGAGATGCCACTGGCCACCAGCTCTTTTTTTGct  
cgagctggcgaattcc  
>CD\_NM\_002162:204  
CgCtGcgagtctGGtatGAGCCTTGAGACGTCCCTATCATTCAAGAGATGATAGGGACGTCTCCAAGGCGTTTTTGct  
cgagctggcgaattcc  
>CD\_NM\_002162:274  
CgCtGcgagtctGGtatGCACGTGACTGGCAACAGTCGGATTCAAGAGATCCGACTGTTGCCAGTCACGTTTTTTGct  
cgagctggcgaattcc  
>CD\_NM\_002162:295  
CgCtGcgagtctGGtatGCTCCTCTGCTCAGTGTACTGCATTCAAGAGATGCAGTACACTGAGCAGAGGATTTTTTGct  
cgagctggcgaattcc  
>CD\_NM\_002162.2:1240  
CgCtGcgagtctGGtatGCGCACTTGAATGGAAAGATAATTCAAGAGATTATCTTTCCATTTCAAGTGCTTTTTTGct  
cgagctggcgaattcc  
>CD\_NM\_002162.2:883  
CgCtGcgagtctGGtatGAGGAGATCGTCTGCAACGTGACTTCAAGAGAGTCACGTTGCAGACGATCTCCTTTTTGct  
cgagctggcgaattcc  
>CD\_NM\_002162.2:149  
CgCtGcgagtctGGtatGCGGAGGGTCCCTGTTTGTGAACTTCAAGAGAGTTCACAAACAGGGACCCCTCATTTTTTGct  
cgagctggcgaattcc  
>CD\_NM\_002162.2:1082  
CgCtGcgagtctGGtatGACCAGCTCAACTTCAGCTAAATTTCAAGAGAATTTAGCTGAAGTTGAGCTGGCTTTTTTGct  
cgagctggcgaattcc  
>CD\_NM\_002162.2:322  
CgCtGcgagtctGGtatGACCAGATAACAGGCTCCTCTAATTTCAAGAGATTAGAGGAGCCTGTTATCTGGGTTTTTGct  
cgagctggcgaattcc  
>CD\_NM\_002162.2:1376  
CgCtGcgagtctGGtatGCACACATAATGGTACTTATCAGTTCAAGAGACTGATAAGTACCATTATGTGTTTTTTGct  
cgagctggcgaattcc  
>CD\_NM\_002162.2:1499  
CgCtGcgagtctGGtatGAACCCTGGGCGTGGTACTATCTTCAAGAGAGATAGTCACCACGCCAGGGTCTTTTTTGct  
cgagctggcgaattcc  
>CD\_NM\_002162.2:1160  
CgCtGcgagtctGGtatGAGGCGAGTCTTGCACAGGAACCTCAAGAGAGTTCCTGTGCAAGAACTCGCCGTTTTTGct  
cgagctggcgaattcc  
>CD\_NM\_002162.2:1357  
CgCtGcgagtctGGtatGCCCCGTTCTTCGTCAACGTAACCTTCAAGAGAGTTACGTTGACGAAGAACGGGATTTTTTGct  
cgagctggcgaattcc  
>CD\_NM\_002162.2:1004  
CgCtGcgagtctGGtatGAACAGTGACCGTGAGTTGCATGTTCAAGAGACATGCAACTCACGGTCACTGTGTTTTTGct  
cgagctggcgaattcc  
>CD\_NM\_002162.2:1525  
CgCtGcgagtctGGtatGCGGCCTTAATGTACGTCTTCAAGAGACTGAAGACGTACATTAAGGCCATTTTTTGct  
cgagctggcgaattcc  
>CD\_NM\_002162.2:613  
CgCtGcgagtctGGtatGAGCTGGGACTGTTTCGTGAACACTTCAAGAGAGTGTTCACGAACAGTCCCAGCCTTTTTTGct  
cgagctggcgaattcc  
>CD\_NM\_002162.2:176  
CgCtGcgagtctGGtatGCACTGATTGTCCAGCTCTGAGTTCAAGAGACTCAGAGCTGGGACAATCAGTATTTTTTGct  
cgagctggcgaattcc  
>CD\_NM\_002162.2:1427

CgCtGcgagtctGGtatGAACCTGGTCGTGGTGATGGACTTCAAGAGAGTCCATCACCACGACCAGGGTGTGTTTTGct  
cgagctggcgaattcc  
>CD\_NM\_002162.2:878  
CgCtGcgagtctGGtatGCGCCGGGAGATCGTCTGCAACTTCAAGAGAGTTGCAGACGATCTCCCGGCATTTTTGct  
cgagctggcgaattcc  
>CD\_NM\_002162.2:1529  
CgCtGcgagtctGGtatGATTAATGTACGTCCTCAGGGAGTTCAAGAGACTCCCTGAAGACGTACATTAAGTTTTGct  
cgagctggcgaattcc  
>CD\_NM\_002162.2:1156  
CgCtGcgagtctGGtatGCGGACGGCGAGTCTTGACACAGTTCAAGAGACTGTGCAAGAACTCGCCGTCCATTTTTGct  
cgagctggcgaattcc  
>CD\_NM\_002162.2:1364  
CgCtGcgagtctGGtatGATTCGTCAACGTAACACATAATTTCAAGAGAATTATGTGTTACGTTGACGAAGTTTTGct  
cgagctggcgaattcc  
>CD\_NM\_002162.2:1034  
CgCtGcgagtctGGtatGCCGAGTCCAGGTCACGCTGGACTTCAAGAGAGTCCAGCGTGACCTGGACTCGATTTTTGct  
cgagctggcgaattcc  
>CD\_NM\_002162.2:206  
CgCtGcgagtctGGtatGATTGGAGACGTCCCTATCAAAGTTCAAGAGACTTTGATAGGGACGTCTCCAAGTTTTGct  
cgagctggcgaattcc  
>CD\_NM\_002162.2:1495  
CgCtGcgagtctGGtatGCACTGACCTGGGCGTGGTGACTTCAAGAGAGTCCACCACGCCAGGGTCAGTATTTTTGct  
cgagctggcgaattcc  
>CD\_NM\_002162.2:1402  
CgCtGcgagtctGGtatGCAGCGTCCAGCTCACGAGGCAATTTCAAGAGATTGCCTCGTGAGCTGGACGCTTTTTTGTct  
cgagctggcgaattcc  
>CD\_NM\_002162.2:310  
CgCtGcgagtctGGtatGCCTGCAATGGCTCCAGATAACTTCAAGAGAGTTATCTGGGAGCCATTGCAGTTTTTGTct  
cgagctggcgaattcc  
>CD\_NM\_002210:549  
CgCtGcgagtctGGtatGAGCCGGTGCCAGCCAATTTGAATTTCAAGAGAATTCAATTGGCTGGCACCGGCGTTTTTGTct  
cgagctggcgaattcc  
>CD\_NM\_002210:1159  
CgCtGcgagtctGGtatGATGGCGAGCAGATGGCTGCATATTTCAAGAGATATGCAGCCATCTGCTCGCCAGTTTTTGTct  
cgagctggcgaattcc  
>CD\_NM\_002210:1407  
CgCtGcgagtctGGtatGAACCAGGATGGTTTCAATGATATTTCAAGAGATATCATTGAAACCATCCTGGTCTTTTTGTct  
cgagctggcgaattcc  
>CD\_NM\_002210:1582  
CgCtGcgagtctGGtatGCAGGAGCCACAGATATAGACAATTTCAAGAGATTGTCTATATCTGTGGCTCCTTTTTTGTct  
cgagctggcgaattcc  
>CD\_NM\_002210:2354  
CgCtGcgagtctGGtatGCTCCTGTGCATTTAAGACAGAATTTCAAGAGATTCTGTCTTAAATGCACAGGAATTTTTGTct  
cgagctggcgaattcc  
>CD\_NM\_002210:2832  
CgCtGcgagtctGGtatGCTGGAGATCAACCTTTGAGAATTTCAAGAGATTCTCAAAGGGTTGATCTCCATTTTTTGTct  
cgagctggcgaattcc  
>CD\_NM\_002210:1664  
CgCtGcgagtctGGtatGAGCCAGACCAGTTATCACTGTATTTCAAGAGATACAGTGATAACTGGTCTGGCCTTTTTGTct  
cgagctggcgaattcc  
>CD\_NM\_002210.2:2911  
CgCtGcgagtctGGtatGACGGGACCATCTCATCACTAAGTTCAAGAGACTTAGTGATGAGATGGTCCCGCTTTTTGTct  
cgagctggcgaattcc  
>CD\_NM\_002210.2:2224

CgCctGcgagtctGGtatGACCTCTGACATTGATTGTTAAGTTCAAGAGACTTAACAATCAATGTCAGAGGGTTTTTGct  
cgagctggcgaattcc  
>CD\_NM\_002210.2:3127  
CgCctGcgagtctGGtatGCTCATTTAATGTCATAGAGTTTTTCAAGAGAAAACCTCTATGACATTAAATGAATTTTTTGct  
cgagctggcgaattcc  
>CD\_NM\_002210.2:1957  
CgCctGcgagtctGGtatGATGTGAGGAATTGATAGCGTATTTCAAGAGAATACGCTATCAATTCCCTCACACTTTTTTGct  
cgagctggcgaattcc  
>CD\_NM\_002210.2:1259  
CgCctGcgagtctGGtatGAATCGTGGCTCTGATGGCAAACCTTCAAGAGAGTTTGCCATCAGAGCCACGATCTTTTTTGct  
cgagctggcgaattcc  
>CD\_NM\_002210.2:1298  
CgCctGcgagtctGGtatGATCTCAGTGTCTCTACAGAGAGTTCAAGAGACTCTCTGTAGAGACACTGAGACTTTTTTGct  
cgagctggcgaattcc  
>CD\_NM\_002210.2:1982  
CgCctGcgagtctGGtatGAGGGATGAATCTGAATTTAGAGTTCAAGAGACTCTAAATTCAGATTCATCCCGTTTTTGct  
cgagctggcgaattcc  
>CD\_NM\_002210.2:586  
CgCctGcgagtctGGtatGCAGAGATTATGCCAAGGATGATTTCAAGAGAATCATCCTTGGCATAATCTCTATTTTTTGct  
cgagctggcgaattcc  
>CD\_NM\_002210.2:2776  
CgCctGcgagtctGGtatGCCTGTTGTATATCCTTCATTATTTCAAGAGAATAATGAAGGATATACAACAGATTTTTTGct  
cgagctggcgaattcc  
>CD\_NM\_002210.2:2417  
CgCctGcgagtctGGtatGCAGGCTGGAACCTCACTCTTAGTTCAAGAGACTAAGAGTTGAGTTCCAGCCTTTTTTTTGct  
cgagctggcgaattcc  
>CD\_NM\_002210.2:716  
CgCctGcgagtctGGtatGAAGCGAGAGCCTGTTGGAACATTTCAAGAGAATGTTCCAACAGGCTCTCGCTCTTTTTTGct  
cgagctggcgaattcc  
>CD\_NM\_002210.2:1999  
CgCctGcgagtctGGtatGCAGAGACAACTCACTCCAATTTTTCAAGAGAAATTTGGAGTGAGTTTGTCTCTATTTTTTGct  
cgagctggcgaattcc  
>CD\_NM\_002210.2:1296  
CgCctGcgagtctGGtatGCGGTCTCAGTGTCTCTACAGAGTTCAAGAGACTCTGTAGAGACACTGAGACCTTTTTTTGct  
cgagctggcgaattcc  
>CD\_NM\_002210.2:2380  
CgCctGcgagtctGGtatGCACTCGCCAGGTGGTATGTGACTTCAAGAGAGTCACATACCACCTGGCGAGTTTTTTTTGct  
cgagctggcgaattcc  
>CD\_NM\_002210.2:1676  
CgCctGcgagtctGGtatGCTCACTGTAAATGCTGGTCTTGTTCAAGAGACAAGACCAGCATTTACAGTGATTTTTTTGct  
cgagctggcgaattcc  
>CD\_NM\_002210.2:2832  
CgCctGcgagtctGGtatGCGGAGATCAACCCTTTGAGAATTTCAAGAGAATCTCAAAGGGTTGATCTCCATTTTTTGct  
cgagctggcgaattcc  
>CD\_NM\_002210.2:2648  
CgCctGcgagtctGGtatGCACCCTGAGACTGAAGAAGATGTTCAAGAGACATCTTCTTCAGTCTCAGGGTTTTTTTTGct  
cgagctggcgaattcc  
>CD\_NM\_002210.2:3335  
CgCctGcgagtctGGtatGATCCGGCCACCTCAAGAAGAACCTTCAAGAGAGTTCTTCTTGAGGTGGCCGACTTTTTTGct  
cgagctggcgaattcc  
>CD\_NM\_002210.2:774  
CgCctGcgagtctGGtatGATCCATGTAGATCAAGAATATTTCAAGAGAATATCTTGTGATCTACATGGAGTTTTTTGct  
cgagctggcgaattcc  
>CD\_NM\_002210.2:3045

CgCctGcgagtctGGtatGCGTACGTAAAGTCATTACTGTGTTCAAGAGACACAGTAATGACTTTACGTACATTTTTTGct  
cgagctggcgaattcc  
>CD\_NM\_002210.2:2786  
CgCctGcgagtctGGtatGCTCCTTCATTATGATATTGATGTTCAAGAGACATCAATATCATAATGAAGGATTTTTTGct  
cgagctggcgaattcc  
>CD\_NM\_002210.2:3002  
CgCctGcgagtctGGtatGATCTGCCAAGTTGGGAGATTAGTTCAAGAGACTAATCTCCCAACTTGGCAGACTTTTTTGct  
cgagctggcgaattcc  
>CD\_NM\_002210.2:2243  
CgCctGcgagtctGGtatGCAGGCTCAGAATCAAGGAGAAGTTCAAGAGACTTCTCCTTGATTCTGAGCCTTTTTTTGct  
cgagctggcgaattcc  
>CD\_NM\_002210.2:3113  
CgCctGcgagtctGGtatGATGAAGTCGTCTGCTTCATTTATTCAAGAGATAAATGAAGCAGACGACTTCAGTTTTTGct  
cgagctggcgaattcc  
>CD\_NM\_002210.2:490  
CgCctGcgagtctGGtatGAACCCAGCCTGGGATTGTGGAATTCAAGAGATTCCACAATCCCAGGCTGGGTGTTTTTGct  
cgagctggcgaattcc  
>CD\_NM\_002210.2:1562  
CgCctGcgagtctGGtatGCGCTTTGGCTATTCAATGAAAGTTCAAGAGACTTTCATTGAATAGCCAAAGCTTTTTTGct  
cgagctggcgaattcc  
>CD\_NM\_001803:137  
CgCctGcgagtctGGtatGACTGGTTATGGTACAGATAACAATTC AAGAGATTGTATCTGTACCATAACCAGGTTTTTGct  
cgagctggcgaattcc  
>CD\_NM\_001803:261  
CgCctGcgagtctGGtatGCTCCACCTCTTCTGCTTCAGTTTTTCAAGAGAAACTGAAGCAGAAGAGGTGGATTTTTTGct  
cgagctggcgaattcc  
>CD\_NM\_001803.2:261  
CgCctGcgagtctGGtatGCCACCTCTTCTGCTTCAGTTGTTCAAGAGACA ACTGAAGCAGAAGAGGTGGATTTTTTGct  
cgagctggcgaattcc  
>CD\_NM\_001803.2:124  
CgCctGcgagtctGGtatGAACCATCAGCTCCTGGTTATGTTCAAGAGACATAACCAGGAGGCTGATGGTGTTTTTGct  
cgagctggcgaattcc  
>CD\_NM\_001803.2:149  
CgCctGcgagtctGGtatGAAGATACAACTGGACTCTCAGTTCAAGAGACTGAGAGTCCAGTTTGTATCTGTTTTTGct  
cgagctggcgaattcc  
>CD\_NM\_001803.2:244  
CgCctGcgagtctGGtatGAGTGGCCAATGCCATAATCCACTTCAAGAGAGTGGATTATGGCATTGGCCACGTTTTTGct  
cgagctggcgaattcc  
>CD\_NM\_001803.2:130  
CgCctGcgagtctGGtatGAAGCCTCCTGGTTATGGTACAGTTCAAGAGACTGTACCATAACCAGGAGGCTGTTTTTGct  
cgagctggcgaattcc  
>CD\_NM\_001803.2:128  
CgCctGcgagtctGGtatGCTCAGCTCCTGGTTATGGTACTTCAAGAGAGTACCATAACCAGGAGGCTGATTTTTTGct  
cgagctggcgaattcc  
>CD\_NM\_001803.2:133  
CgCctGcgagtctGGtatGACTCCTGGTTATGGTACAGATATTCAAGAGATATCTGTACCATAACCAGGAGTTTTTGct  
cgagctggcgaattcc  
>CD\_NM\_001803.2:200  
CgCctGcgagtctGGtatGACCTCAGCATCCAGCAACATAATTC AAGAGATTATGTTGCTGGATGCTGAGGGTTTTTGct  
cgagctggcgaattcc  
>CD\_NM\_001803.2:256  
CgCctGcgagtctGGtatGAATAATCCACCTCTTCTGCTTCTTCAAGAGAGAAGCAGAAGAGGTGGATTATGTTTTTGct  
cgagctggcgaattcc  
>CD\_NM\_001803.2:108

CgCtGcgagtctGGtatGCCCTCTCCTCCTACTCACCATTTCAAGAGAATGGTGAGTAGGAGGAAGAGGATTTTTGct  
cgagctggcgaattcc  
>CD\_NM\_001803.2:136  
CgCtGcgagtctGGtatGACTGGTTATGGTACAGATACAATTTCAAGAGATTGTATCTGTACCATAACCAGTTTTGct  
cgagctggcgaattcc  
>CD\_NM\_001803.2:201  
CgCtGcgagtctGGtatGACTCAGCATCCAGCAACATAAGTTCAAGAGACTTATGTTGCTGGATGCTGAGTTTTGct  
cgagctggcgaattcc  
>CD\_NM\_001803.2:263  
CgCtGcgagtctGGtatGAACCTCTTCTGCTTCAGTTGAGTTCAAGAGACTCAACTGAAGCAGAAGAGGTGTTTTGct  
cgagctggcgaattcc  
>CD\_NM\_001803.2:138  
CgCtGcgagtctGGtatGCGGTTATGGTACAGATACAACTTTCAAGAGAGTTTGTATCTGTACCATAACCATTTTTGct  
cgagctggcgaattcc  
>CD\_NM\_001803.2:134  
CgCtGcgagtctGGtatGATCCTGGTTATGGTACAGATACTTTCAAGAGAGTATCTGTACCATAACCAGGAGTTTTGct  
cgagctggcgaattcc  
>CD\_NM\_001803.2:143  
CgCtGcgagtctGGtatGCTGGTACAGATACAACTGGACTTTCAAGAGAGTCCAGTTTGTATCTGTACCATTTTTGct  
cgagctggcgaattcc  
>CD\_NM\_001803.2:239  
CgCtGcgagtctGGtatGCTCTTCGTGGCCAATGCCATAATTTCAAGAGATTATGGCATTGGCCACGAAGAATTTTTGct  
cgagctggcgaattcc  
>CD\_NM\_001803.2:252  
CgCtGcgagtctGGtatGCTGCCATAATCCACCTCTTCTGTTCAAGAGACAGAAGAGGTGGATTATGGCATTTTTGct  
cgagctggcgaattcc  
>CD\_NM\_001803.2:103  
CgCtGcgagtctGGtatGACGCTTCTCCTCCTACTCTTCAAGAGAGAGTAGGAGGAAGAGGAAGCGTTTTGct  
cgagctggcgaattcc  
>CD\_NM\_001803.2:258  
CgCtGcgagtctGGtatGCAATCCACCTCTTCTGCTTCAGTTCAAGAGACTGAAGCAGAAGAGGTGGATTATTTTTGct  
cgagctggcgaattcc  
>CD\_NM\_001803.2:147  
CgCtGcgagtctGGtatGCACAGATACAACTGGACTCTTCAAGAGAGAGTCCAGTTTGTATCTGTATTTTTGct  
cgagctggcgaattcc  
>CD\_NM\_001803.2:106  
CgCtGcgagtctGGtatGATTCTCCTCCTCCTACTCACCTTTCAAGAGAGGTGAGTAGGAGGAAGAGGAAGTTTTGct  
cgagctggcgaattcc  
>CD\_NM\_001803.2:123  
CgCtGcgagtctGGtatGCCACCATCAGCCTCCTGGTTATTTCAAGAGAATAACCAGGAGGCTGATGGTGATTTTTGct  
cgagctggcgaattcc  
>CD\_NM\_001803.2:118  
CgCtGcgagtctGGtatGACTACTCACCATCAGCCTCCTGTTCAAGAGACAGGAGGCTGATGGTGAGTAGTTTTGct  
cgagctggcgaattcc  
>CD\_NM\_001803.2:177  
CgCtGcgagtctGGtatGCCGACACCAGCCAAACCAGCAGTTCAAGAGACTGCTGGTTTGGCTGGTGTCGTTTTGct  
cgagctggcgaattcc  
>CD\_NM\_001803.2:105  
CgCtGcgagtctGGtatGACTTCTCCTCCTACTCACTTTCAAGAGAGTGAAGTAGGAGGAAGAGGAAGCTTTTTGct  
cgagctggcgaattcc  
>CD\_NM\_001803.2:111  
CgCtGcgagtctGGtatGCCTTCTCCTACTCACCATCAGTTCAAGAGACTGATGGTGAGTAGGAGGAAGATTTTTGct  
cgagctggcgaattcc  
>CD\_NM\_001803.2:132

CgCctGcgagtctGGtatGACCTCCTGGTTATGGTACAGATTTCAAGAGAATCTGTACCATAACCAGGAGGCTTTTTTGct  
cgagctggcgaattcc  
>CD\_NM\_001803.2:135  
CgCctGcgagtctGGtatGCCCTGGTTATGGTACAGATACATTCAAGAGATGTATCTGTACCATAACCAGGATTTTTTGct  
cgagctggcgaattcc  
>CD\_NM\_001803.2:102  
CgCctGcgagtctGGtatGCGCGCTTCTCTTCTCTACTTTCAAGAGAAGTAGGAGGAAGAGGAAGCGCTTTTTTGct  
cgagctggcgaattcc  
>CD\_NM\_001803.2:212  
CgCctGcgagtctGGtatGCGCAACATAAGCGGAGGCATTTTTCAAGAGAAAATGCCTCCGCTTATGTTGCTTTTTTGct  
cgagctggcgaattcc  
>CD\_NM\_000560:411  
CgCctGcgagtctGGtatGCGGCCATCCTGCTCTTTGTATATTCAAGAGATATACAAAGAGCAGGATGGCCATTTTTTGct  
cgagctggcgaattcc  
>CD\_NM\_000560.2:353  
CgCctGcgagtctGGtatGATCTGCTTATGTCGTTCTTCATTTCAAGAGAATGAAGAACGACATAAGCAGACTTTTTTGct  
cgagctggcgaattcc  
>CD\_NM\_000560.2:126  
CgCctGcgagtctGGtatGCAGCTTGAACTGCTGAAGTATTTCAAGAGAATACTTCAGCAGTTTCAAGCTATTTTTTGct  
cgagctggcgaattcc  
>CD\_NM\_000560.2:281  
CgCctGcgagtctGGtatGCTGTTCATCGTGGGCTCTATTATTTCAAGAGAATAATAGAGCCCACGATGACAATTTTTTGct  
cgagctggcgaattcc  
>CD\_NM\_000560.2:468  
CgCctGcgagtctGGtatGAACCGACAGCATCCACCGTTACTTCAAGAGAGTAACGGTGGATGCTGTTCGGTCTTTTTTGct  
cgagctggcgaattcc  
>CD\_NM\_000560.2:632  
CgCctGcgagtctGGtatGCAGCAAGACTGTGGTTTCATTCTTCAAGAGAGAATGAAACCACAGTCTTGCTTTTTTTGct  
cgagctggcgaattcc  
>CD\_NM\_000560.2:432  
CgCctGcgagtctGGtatGCGAACAGAAGCTGAATGAGTATTTCAAGAGAATACTCATTTCAGCTTCTGTTTCAATTTTTGct  
cgagctggcgaattcc  
>CD\_NM\_000560.2:411  
CgCctGcgagtctGGtatGAGCCATCCTGCTCTTTGTATATTTCAAGAGAATATACAAAGAGCAGGATGGCCTTTTTTGct  
cgagctggcgaattcc  
>CD\_NM\_000560.2:720  
CgCctGcgagtctGGtatGCGCACTGACCCGAACTGCCAGTTCAAGAGACTGGCAGTTTCAGGGTCAGTGCATTTTTTGct  
cgagctggcgaattcc  
>CD\_NM\_000560.2:267  
CgCctGcgagtctGGtatGACTGGGCAATGTGTTTGTTCATCTTCAAGAGAGATGACAAACACATTGCCAGCTTTTTTGct  
cgagctggcgaattcc  
>CD\_NM\_000560.2:659  
CgCctGcgagtctGGtatGCCCTGTATATCGGAATCATCACTTCAAGAGAGTGATGATTCCGATATACAGGATTTTTTGct  
cgagctggcgaattcc  
>CD\_NM\_000560.2:415  
CgCctGcgagtctGGtatGCTCCTGCTCTTTGTATATGAACTTCAAGAGAGTTCATATACAAAGAGCAGGATTTTTTGct  
cgagctggcgaattcc  
>CD\_NM\_000560.2:320  
CgCctGcgagtctGGtatGCGGGCTGCATGGGCTCTATCAATTTCAAGAGATTGATAGAGCCCATGCAGCCATTTTTTGct  
cgagctggcgaattcc  
>CD\_NM\_000560.2:204  
CgCctGcgagtctGGtatGCGGGATCTACCTGCTGATCCACTTCAAGAGAGTGGATCAGCAGGTAGATCCCATTTTTTGct  
cgagctggcgaattcc  
>CD\_NM\_000560.2:636



CgCtGcgagtctGGtatGCAGACTGTGGTTTCATTCCAATTTCAAGAGAATTGGAATGAAACCACAGTCTTTTTTTGct  
cgagctggcgaattcc  
>CD\_NM\_000560.2:684  
CgCtGcgagtctGGtatGATGTGTATGTGTGATTGAGGTGTTCAAGAGACACCTCAATCACACATACACAGTTTTTTGct  
cgagctggcgaattcc  
>CD\_NM\_000560.2:538  
CgCtGcgagtctGGtatGATGCAGTGTGTGGTATAAATGTTCAAGAGACATTTATACCACAACACTGCAGTTTTTTGct  
cgagctggcgaattcc  
>CD\_NM\_000560.2:410  
CgCtGcgagtctGGtatGCGGCCATCCTGCTCTTTGTATATTCAAGAGATATACAAAGAGCAGGATGGCCATTTTTTTGct  
cgagctggcgaattcc  
>CD\_NM\_000560.2:726  
CgCtGcgagtctGGtatGAACCCTGAACTGCCAGATTGACTTCAAGAGAGTCAATCTGGCAGTTCAGGGTCTTTTTTTGct  
cgagctggcgaattcc  
>CD\_NM\_000560.2:616  
CgCtGcgagtctGGtatGAAGGGTTGCTATGCGAAAGCAATTCAAGAGATTGCTTTCGCATAGCAACCCTCTTTTTTTGct  
cgagctggcgaattcc  
>CD\_NM\_000560.2:657  
CgCtGcgagtctGGtatGCTTCTGTATATCGGAATCATCTTCAAGAGAGATGATTCCGATATACAGGAAATTTTTTTGct  
cgagctggcgaattcc  
>CD\_NM\_000560.2:230  
CgCtGcgagtctGGtatGCCTTCGGAGTGCTCTTCCATAAATCAAGAGATTATGGAAGAGCACTCCGAAGTTTTTTTTGct  
cgagctggcgaattcc  
>CD\_NM\_000560.2:535  
CgCtGcgagtctGGtatGCTTCTGCAGTGTGTGGTATAAATCAAGAGATTATACCACAACACTGCAGAAATTTTTTTGct  
cgagctggcgaattcc  
>CD\_NM\_000560.2:381  
CgCtGcgagtctGGtatGACTGATTATCCTCCTTGCTGAGTTCAAGAGACTCAGCAAGGAGGATAATCAGCTTTTTTTGct  
cgagctggcgaattcc  
>CD\_NM\_000560.2:714  
CgCtGcgagtctGGtatGATCCTTTGCACTGACCCTGAACTTCAAGAGAGTTCAGGGTCAGTGCAAAGGACTTTTTTTGct  
cgagctggcgaattcc  
>CD\_NM\_000560.2:260  
CgCtGcgagtctGGtatGACCTCACGCTGGGCAATGTGTTTTCAAGAGAAACACATTGCCAGCGTGAGGGTTTTTTGct  
cgagctggcgaattcc  
>CD\_NM\_000560.2:419  
CgCtGcgagtctGGtatGCGCTCTTTGTATATGAACAGAATTCAAGAGATTCTGTTTCATATACAAAGAGCATTTTTTTGct  
cgagctggcgaattcc  
>CD\_NM\_000560.2:516  
CgCtGcgagtctGGtatGATGGGACTCCATCCAGTCATTTTTTTCAAGAGAAAATGACTGGATGGAGTCCCACTTTTTTGct  
cgagctggcgaattcc  
>CD\_NM\_000560.2:647  
CgCtGcgagtctGGtatGCTCATTCCAATTCCTGTATATTTCAAGAGAATATACAGGAAATTGGAATGAATTTTTTTGct  
cgagctggcgaattcc  
>CD\_NM\_000560.2:207  
CgCtGcgagtctGGtatGAATCTACCTGCTGATCCACAACCTTCAAGAGAGTTGTGGATCAGCAGGTAGATCTTTTTTTGct  
cgagctggcgaattcc  
>CD\_NM\_000560.2:291  
CgCtGcgagtctGGtatGAGGCTCTATTATCATGGTAGTTTTTTCAAGAGAACTACCATGATAATAGAGCCCTTTTTTTGct  
cgagctggcgaattcc  
>CD\_NM\_000560.2:512  
CgCtGcgagtctGGtatGAAGCGTGGGACTCCATCCAGTCTTCAAGAGAGACTGGATGGAGTCCCACGCTTTTTTTGct  
cgagctggcgaattcc  
>CD\_NM\_000560.2:533

CgCctGcgagtctGGtatGAATTTCTGCAGTGTGTGGTATTTCAAGAGAATACCACAACACTGCAGAAATGTTTTTGct  
cgagctggcgaattcc  
>CD\_NM\_000201:319  
CgCctGcgagtctGGtatGCGCCAACCAATGTGCTATTCAATTCAAGAGATTGAATAGCACATTGGTTGGCTTTTTTTGct  
cgagctggcgaattcc  
>CD\_NM\_000201:346  
CgCctGcgagtctGGtatGACTGATGGGCAGTCAACAGCTATTCAAGAGATAGCTGTTGACTGCCCATCAGGTTTTTTGct  
cgagctggcgaattcc  
>CD\_NM\_000201.1:319  
CgCctGcgagtctGGtatGACCAACCAATGTGCTATTCAAATTCAAGAGATTTGAATAGCACATTGGTTGGCTTTTTTTGct  
cgagctggcgaattcc  
>CD\_NM\_000201.1:641  
CgCctGcgagtctGGtatGCGGGCTGGAGCTGTTTGAGAACTTCAAGAGAGTTCTCAAACAGCTCCAGCCTTTTTTGct  
cgagctggcgaattcc  
>CD\_NM\_000201.1:878  
CgCctGcgagtctGGtatGATCAGTCAGTGTGACCGCAGAGTTCAAGAGACTCTGCGGTACACTGACTGAGTTTTTTGct  
cgagctggcgaattcc  
>CD\_NM\_000201.1:1187  
CgCctGcgagtctGGtatGAGCCGGCCAGCTTATACACAAGTTCAAGAGACTTGTGTATAAGCTGGCCGGCTTTTTTGct  
cgagctggcgaattcc  
>CD\_NM\_000201.1:1064  
CgCctGcgagtctGGtatGCAGAGCCAAGGTGACGCTGAATTTCAAGAGAATTCAGCGTCACCTTGCTCTATTTTTGct  
cgagctggcgaattcc  
>CD\_NM\_000201.1:1112  
CgCctGcgagtctGGtatGAAGGGCCAGCTCCTGCTGAAGTTCAAGAGACTTCAGCAGGAGCTGGGCCCTTTTTTTGct  
cgagctggcgaattcc  
>CD\_NM\_000201.1:961  
CgCctGcgagtctGGtatGCGCAGACAGTGACCATCTACAGTTCAAGAGACTGTAGATGGTCACTGTCTGCATTTTTTTGct  
cgagctggcgaattcc  
>CD\_NM\_000201.1:296  
CgCctGcgagtctGGtatGCCTGAGCAATGTGCAAGAAGATTTCAAGAGAATCTTCTTGCACATTGCTCAGTTTTTTGct  
cgagctggcgaattcc  
>CD\_NM\_000201.1:913  
CgCctGcgagtctGGtatGCGCGGCTGACGTGTGCAGTAATTTCAAGAGAATTTACTGCACACGTCAGCCGTTTTTTGct  
cgagctggcgaattcc  
>CD\_NM\_000201.1:876  
CgCctGcgagtctGGtatGACCTCAGTCAGTGTGACCGCAGTTCAAGAGACTGCGGTACACTGACTGAGGTTTTTTGct  
cgagctggcgaattcc  
>CD\_NM\_000201.1:959  
CgCctGcgagtctGGtatGCCTGCAGACAGTGACCATCTACTTCAAGAGAGTAGATGGTCACTGTCTGCAGTTTTTTGct  
cgagctggcgaattcc  
>CD\_NM\_000201.1:1454  
CgCctGcgagtctGGtatGAACCCGCGAGGTGACCGTGAATTTCAAGAGAATTCACGGTCACCTCGCGGGTGTTTTTGct  
cgagctggcgaattcc  
>CD\_NM\_000201.1:214  
CgCctGcgagtctGGtatGCCAGCCCAAGTTGTTGGGCATTTCAAGAGAATGCCCAACAACCTGGGCTGGTTTTTTGct  
cgagctggcgaattcc  
>CD\_NM\_000201.1:1546  
CgCctGcgagtctGGtatGACCTCAGCACGTACCTCTATAATTCAAGAGATTATAGAGGTACGTGCTGAGGTTTTTTGct  
cgagctggcgaattcc  
>CD\_NM\_000201.1:1057  
CgCctGcgagtctGGtatGACCACCTAGAGCCAAGGTGACTTCAAGAGAGTCACCTTGCTCTAGGGTGGTTTTTTGct  
cgagctggcgaattcc  
>CD\_NM\_000201.1:425

CgCctGcgagtctGGtatGCTGGCAGCCAGTGGGCAAGAACTTCAAGAGAGTTCTTGCCCACTGGCTGCCAATTTTTGct  
cgagctggcgaattcc  
>CD\_NM\_000201.1:965  
CgCctGcgagtctGGtatGAACAGTGACCATCTACAGCTTTTTCAAGAGAAAAGCTGTAGATGGTCACTGTCTTTTTGct  
cgagctggcgaattcc  
>CD\_NM\_000201.1:598  
CgCctGcgagtctGGtatGAAGCCAATTTCTCGTGCCGCACTTCAAGAGAGTGCGGCACGAGAAATTGGCTCTTTTTGct  
cgagctggcgaattcc  
>CD\_NM\_000201.1:272  
CgCctGcgagtctGGtatGCGGGAACAACCGGAAGGTGTATTTCAAGAGAATACACCTTCCGGTTGTTCCCATTTTTGct  
cgagctggcgaattcc  
>CD\_NM\_000201.1:346  
CgCctGcgagtctGGtatGATGATGGGCACTCAACAGCTAATTCAAGAGATTAGCTGTTGACTGCCCATCAGTTTTGct  
cgagctggcgaattcc  
>CD\_NM\_000201.1:1568  
CgCctGcgagtctGGtatGACGCCAGCGGAAGATCAAGAAATTCAAGAGATTTCTTGATCTTCCGCTGGCGTTTTGct  
cgagctggcgaattcc  
>CD\_NM\_000201.1:569  
CgCctGcgagtctGGtatGAACGGTGCTGGTGAGGAGAGATTTCAAGAGAATCTCTCCTCACCAGCACCGTGTTTTTGct  
cgagctggcgaattcc  
>CD\_NM\_000201.1:1028  
CgCctGcgagtctGGtatGCGGGACCGAGGTGACAGTGAAGTTCAAGAGACTTCACTGTCACCTCGGTCCCTTTTTGct  
cgagctggcgaattcc  
>CD\_NM\_000201.1:1252  
CgCctGcgagtctGGtatGCCGAGAGGGATTGTCCGGAAATTTCAAGAGATTTCCCGGACAATCCCTCTCGTTTTTTGct  
cgagctggcgaattcc  
>CD\_NM\_000201.1:1571  
CgCctGcgagtctGGtatGACAGCGGAAGATCAAGAAATACTTCAAGAGAGTATTTCTTGATCTTCCGCTGGTTTTGct  
cgagctggcgaattcc  
>CD\_NM\_000201.1:915  
CgCctGcgagtctGGtatGAGGCTGACGTGTGCAGTAATACTTCAAGAGAGTATTACTGCACACGTACCCGTTTTGct  
cgagctggcgaattcc  
>CD\_NM\_000201.1:1190  
CgCctGcgagtctGGtatGAGGCCAGCTTATACACAAGAACTTCAAGAGAGTTCTTGTGTATAAGCTGGCCGTTTTGct  
cgagctggcgaattcc  
>CD\_NM\_000201.1:1034  
CgCctGcgagtctGGtatGAGAGGTGACAGTGAAGTGTGAGTTCAAGAGACTCACACTTCACTGTCACCTCGTTTTGct  
cgagctggcgaattcc  
>CD\_NM\_000201.1:184  
CgCctGcgagtctGGtatGACGTGCTGGTGACATGCAGCACTTCAAGAGAGTGCTGCATGTCACCAGCACGGTTTTGct  
cgagctggcgaattcc  
>CD\_NM\_000201.1:992  
CgCctGcgagtctGGtatGACCCAACGTGATTCTGACGAAGTTCAAGAGACTTCGTCAGAATCACGTTGGGCTTTTTGct  
cgagctggcgaattcc  
>CD\_NM\_000201.1:1180  
CgCctGcgagtctGGtatGCGGAGGTGGCCGGCCAGCTTATTTCAAGAGAATAAGCTGGCCGGCCACCTCCATTTTTGct  
cgagctggcgaattcc  
>CD\_NM\_000574:472  
CgCctGcgagtctGGtatGCAGGACTCAGTGATCTGCCTTATTTCAAGAGATAAGGCAGATCACTGAGTCCTTTTTGct  
cgagctggcgaattcc  
>CD\_NM\_000574:493  
CgCctGcgagtctGGtatGCAGGGCAGTCAATGGTCAGATATTTCAAGAGATATCTGACCATTGACTGCCCTTTTTGct  
cgagctggcgaattcc  
>CD\_NM\_000574:538

CgCtGcgagtctGGtatGCGCGAGGTGCCAACAAGGCTAATTCAAGAGATTAGCCTTGTGGCACCTCGCATTTTTTGct  
cgagctggcgaattcc  
>CD\_NM\_000574:577  
CgCtGcgagtctGGtatGAAGCCTTATATCACTCAGAATTTTCAAGAGAAATCTGAGTGATATAAGGCTTTTTTGct  
cgagctggcgaattcc  
>CD\_NM\_000574:891  
CgCtGcgagtctGGtatGACCGTTGCCAGAGTGCAGAGAATTTCAAGAGATTCTCTGCACTCTGGCAACGGTTTTTGct  
cgagctggcgaattcc  
>CD\_NM\_000574:929  
CgCtGcgagtctGGtatGAACCACAAAATTGACAATGGAATTTCAAGAGAATTCATTGTCAATTTGTGGTTTTTTGct  
cgagctggcgaattcc  
>CD\_NM\_000574:578  
CgCtGcgagtctGGtatGCGCCTTATATCACTCAGAATTATTCAAGAGATAATTCTGAGTGATATAAGGCTTTTTTGct  
cgagctggcgaattcc  
>CD\_NM\_000574:1143  
CgCtGcgagtctGGtatGCACCACAGTAAATGTTCCAATTTCAAGAGAAGTTGGAACATTTACTGTGGTATTTTTGct  
cgagctggcgaattcc  
>CD\_NM\_000574.2:978  
CgCtGcgagtctGGtatGCATAGACAGTCTGTAACGTATGTTCAAGAGACATACGTTACAGACTGTCTATATTTTTGct  
cgagctggcgaattcc  
>CD\_NM\_000574.2:1077  
CgCtGcgagtctGGtatGAGCCCACCACCTGAATGCAGAGTTCAAGAGACTCTGCATTAGGTGGTGGGCCTTTTTGct  
cgagctggcgaattcc  
>CD\_NM\_000574.2:493  
CgCtGcgagtctGGtatGCGGGCAGTCAATGGTCAGATATTTCAAGAGAATATCTGACCATTGACTGCCCTTTTTTGct  
cgagctggcgaattcc  
>CD\_NM\_000574.2:903  
CgCtGcgagtctGGtatGCGCAGAGAAATTTATTGTCCAGTTCAAGAGACTGGACAATAAATTTCTCTGCATTTTTGct  
cgagctggcgaattcc  
>CD\_NM\_000574.2:1206  
CgCtGcgagtctGGtatGCCACACCAAATGCTCAAGCAATTTCAAGAGATTGCTTGAGCATTTGGTGTGGTTTTTGct  
cgagctggcgaattcc  
>CD\_NM\_000574.2:892  
CgCtGcgagtctGGtatGAGTTGCCAGAGTGCAGAGAATTTCAAGAGAATTTCTCTGCACTCTGGCAACGTTTTTGct  
cgagctggcgaattcc  
>CD\_NM\_000574.2:793  
CgCtGcgagtctGGtatGATGCAACCATCTCCTTCTCATGTTCAAGAGACATGAGAAGGAGATGGTTGCACTTTTTGct  
cgagctggcgaattcc  
>CD\_NM\_000574.2:605  
CgCtGcgagtctGGtatGCGTCGGTACTGTTGTGGAATATTTCAAGAGAATATCCACAACAGTACCGACTTTTTTGct  
cgagctggcgaattcc  
>CD\_NM\_000574.2:1119  
CgCtGcgagtctGGtatGATCCCACCAACAGTTCAGAACTTTCAAGAGAGTTTCTGAACTGTTGGTGGGACTTTTTGct  
cgagctggcgaattcc  
>CD\_NM\_000574.2:1010  
CgCtGcgagtctGGtatGCGGATTCACCATGATTGGAGAGTTCAAGAGACTCTCCAATCATGGTGAATCCTTTTTTGct  
cgagctggcgaattcc  
>CD\_NM\_000574.2:472  
CgCtGcgagtctGGtatGCGGACTCAGTGATCTGCCTTAATTCAAGAGATTAAGGCAGATCACTGAGTCCTTTTTTGct  
cgagctggcgaattcc  
>CD\_NM\_000574.2:1143  
CgCtGcgagtctGGtatGCCACAGTAAATGTTCCAATTTCAAGAGATAGTTGGAACATTTACTGTGGTTTTTTGct  
cgagctggcgaattcc  
>CD\_NM\_000574.2:1370

CgCctGcgagtctGGtatGCACCATGGGCTTGCTGACTTAGTTCAAGAGACTAAGTCAGCAAGCCCATGGTTTTTTTTGct  
cgagctggcgaattcc  
>CD\_NM\_000574.2:495  
CgCctGcgagtctGGtatGAGCAGTCAATGGTCAGATATTGTTCAAGAGACAATATCTGACCATTGACTGCCTTTTTTGct  
cgagctggcgaattcc  
>CD\_NM\_000574.2:1366  
CgCctGcgagtctGGtatGCAGTAACCATGGGCTTGCTGACTTCAAGAGAGTCAGCAAGCCCATGGTACTATTTTTTGct  
cgagctggcgaattcc  
>CD\_NM\_000574.2:935  
CgCctGcgagtctGGtatGCATTGACAATGGAATAATTCAATTCAAGAGATTGAATTATTCATTGTCAATTTTTTTGct  
cgagctggcgaattcc  
>CD\_NM\_000574.2:993  
CgCctGcgagtctGGtatGCCGTATGCATGTAATAAAGGATTTCAAGAGAATCCTTTATTACATGCATACGTTTTTTGct  
cgagctggcgaattcc  
>CD\_NM\_000574.2:498  
CgCctGcgagtctGGtatGCGTCAATGGTCAGATATTGAAGTTCAAGAGACTTCAATATCTGACCATTGACTTTTTTTGct  
cgagctggcgaattcc  
>CD\_NM\_000574.2:630  
CgCctGcgagtctGGtatGCGCCGTCCAGGTTACAGAAGAGTTCAAGAGACTCTTCTGTAACCTGGACGGCATTTTTTGct  
cgagctggcgaattcc  
>CD\_NM\_000574.2:608  
CgCctGcgagtctGGtatGAGGTAAGTGTGTTGGAATATGAGTTCAAGAGACTCATATTCCACAACAGTACCGTTTTTTGct  
cgagctggcgaattcc  
>CD\_NM\_000574.2:413  
CgCctGcgagtctGGtatGAGAGGATACTGTAATAACGTACTTCAAGAGAGTACGTTATTACAGTATCCTCGTTTTTTGct  
cgagctggcgaattcc  
>CD\_NM\_000574.2:1044  
CgCctGcgagtctGGtatGCGTACTGTGAATAATGATGAAGTTCAAGAGACTTCATCATTATTCACAGTACATTTTTGct  
cgagctggcgaattcc  
>CD\_NM\_000574.2:801  
CgCctGcgagtctGGtatGCTCTCCTTCTCATGTAACACAGTTCAAGAGACTGTGTTACATGAGAAGGAGATTTTTTTGct  
cgagctggcgaattcc  
>CD\_NM\_000574.2:570  
CgCctGcgagtctGGtatGATCAAACAGCCTTATATCACTCTTCAAGAGAGAGTGATATAAGGCTGTTTGAGTTTTTTGct  
cgagctggcgaattcc  
>CD\_NM\_000574.2:797  
CgCctGcgagtctGGtatGCACCATCTCCTTCTCATGTAACCTTCAAGAGAGTTACATGAGAAGGAGATGGTTTTTTTTGct  
cgagctggcgaattcc  
>CD\_NM\_000615:401  
CgCctGcgagtctGGtatGCGCGGATCTCAGTGGTGTGGAATTCAAGAGATTCACACCACTGAGATCCGCTTTTTTTGct  
cgagctggcgaattcc  
>CD\_NM\_000615:635  
CgCctGcgagtctGGtatGCCCCACCAACCATCATCTGGAATTCAAGAGATTCAGATGATGGTTGGTGGGATTTTTTTGct  
cgagctggcgaattcc  
>CD\_NM\_000615:662  
CgCctGcgagtctGGtatGCAGGCCGAGATGTCATCCTGAATTCAAGAGATTCAGGATGACATCTCGGCCTTTTTTTGct  
cgagctggcgaattcc  
>CD\_NM\_000615:1099  
CgCctGcgagtctGGtatGCTCCACCTCAAAGTCTTTGCAATTCAAGAGATTGCAAAGACTTTGAGGTGGATTTTTTTGct  
cgagctggcgaattcc  
>CD\_NM\_000615:1528  
CgCctGcgagtctGGtatGAAGCTGCTGCCAAGCTCCAATTTTTCAAGAGAAATTGGAGCTTGGCAGCAGCTTTTTTTGct  
cgagctggcgaattcc  
>CD\_NM\_000615:2492

CgCctGcgagtctGGtatGCGGGCAAGGCCGCTTCTCGAATTCAAGAGATTCGAGAAGGCGGCCTTGCCCTTTTTTGct  
cgagctggcgaattcc  
>CD\_NM\_000615:328  
CgCctGcgagtctGGtatGATGGCAGGAGATGCCAAAGATATTC AAGAGATATCTTTGGCATCTCCTGCCACTTTTTTGct  
cgagctggcgaattcc  
>CD\_NM\_000615.1:2096  
CgCctGcgagtctGGtatGAAGACACTATCTGGTCAGGTACTTCAAGAGAGTACCTGACCAGATAGTGTCTGTTTTTGct  
cgagctggcgaattcc  
>CD\_NM\_000615.1:542  
CgCctGcgagtctGGtatGATTT CAGAAGCTCATGTTCAAGTTCAAGAGACTTGAACATGAGCTTCTGAAAGTTTTTGct  
cgagctggcgaattcc  
>CD\_NM\_000615.1:2165  
CgCctGcgagtctGGtatGAAGTGACCACGTCATGCTGAAGTTCAAGAGACTTCAGCATGACGTGGTCACTGTTTTTGct  
cgagctggcgaattcc  
>CD\_NM\_000615.1:248  
CgCctGcgagtctGGtatGCGCAGTTTCTCTGCAGGTGGATTTCAAGAGAATCCACCTGCAGAGAACTGCATTTTTTGct  
cgagctggcgaattcc  
>CD\_NM\_000615.1:1531  
CgCctGcgagtctGGtatGCGCTGCCAAGCTCCAATTACAGTTCAAGAGACTGTAATTGGAGCTTGGCAGCATTTTTTGct  
cgagctggcgaattcc  
>CD\_NM\_000615.1:1809  
CgCctGcgagtctGGtatGCGGAGAGCAGTTGGTGAAGAAGTTCAAGAGACTTCTTCACCAACTGCTCTCCATTTTTTGct  
cgagctggcgaattcc  
>CD\_NM\_000615.1:790  
CgCctGcgagtctGGtatGAGGAGATCAACTTCAAGGACATTTCAAGAGAATGTCCTTGAAGTTGATCTCCCTTTTTTGct  
cgagctggcgaattcc  
>CD\_NM\_000615.1:524  
CgCctGcgagtctGGtatGAACCGTCAACGTGAAGATCTTTTTCAAGAGAAAAGATCTTCACGTTGACGGTGTTTTTTGct  
cgagctggcgaattcc  
>CD\_NM\_000615.1:2042  
CgCctGcgagtctGGtatGCGGAAACTCTATTAAAGTGAACTTCAAGAGAGTTCACTTTAATAGAGTTCCATTTTTTGct  
cgagctggcgaattcc  
>CD\_NM\_000615.1:925  
CgCctGcgagtctGGtatGCGCCCACCATGAGCTGGACAAATTC AAGAGATTTGTCCAGCTCATGGTGGGCTTTTTTGct  
cgagctggcgaattcc  
>CD\_NM\_000615.1:1291  
CgCctGcgagtctGGtatGCTGCCCGTGTGTCGTGCTGACTTCAAGAGAGTCAGCGACGACACACGGGCATTTTTTGct  
cgagctggcgaattcc  
>CD\_NM\_000615.1:2009  
CgCctGcgagtctGGtatGCGCACCTAAGCTCGAAGGGCAGTTCAAGAGACTGCCCTTCGAGCTTAGGTGCATTTTTTGct  
cgagctggcgaattcc  
>CD\_NM\_000615.1:1640  
CgCctGcgagtctGGtatGCGCAGTGAACCGCATTGGGCAGTTCAAGAGACTGCCCAATGCGGTTCACTGCATTTTTTGct  
cgagctggcgaattcc  
>CD\_NM\_000615.1:662  
CgCctGcgagtctGGtatGCGGCCGAGATGTCATCCTGAAATTC AAGAGATTT CAGGATGACATCTCGGCCTTTTTTGct  
cgagctggcgaattcc  
>CD\_NM\_000615.1:1739  
CgCctGcgagtctGGtatGAACAGCCCAGGTGCAGTTT GATTTCAAGAGAATCAA ACTGCACCTGGGCTGTGTTTTTGct  
cgagctggcgaattcc  
>CD\_NM\_000615.1:2048  
CgCctGcgagtctGGtatGATCTATTAAAGTGAACCTGATCTTCAAGAGAGATCAGGTTCACTTTAATAGAGTTTTTGct  
cgagctggcgaattcc  
>CD\_NM\_000615.1:692

CgCctGcgagtctGGtatGACGATTCATAGTCCTGTCCAACCTCAAGAGAGTTGGACAGGACTATGAATCGGTTTTTgct  
cgagctggcgaattcc  
>CD\_NM\_000615.1:301  
CgCctGcgagtctGGtatGAAGAGTCCAAATCTTCTTATGTTCAAGAGACATAAGAAGAATTTGGACTCTTTTTTgct  
cgagctggcgaattcc  
>CD\_NM\_000615.1:1310  
CgCctGcgagtctGGtatGAACCTGAAGAGCATCCAGTACTTCAAGAGAGTACTGGATGCTCTTCAGGGTCTTTTTTgct  
cgagctggcgaattcc  
>CD\_NM\_000615.1:887  
CgCctGcgagtctGGtatGATCCGTACCCCTGGTGTGCGATTTCAAGAGAATCGCACACCAGGGTGACGGACTTTTTTgct  
cgagctggcgaattcc  
>CD\_NM\_000615.1:329  
CgCctGcgagtctGGtatGAGCAGGAGATGCCAAAGATAAATTCAGAGATTTATCTTTGGCATCTCCTGCCTTTTTTgct  
cgagctggcgaattcc  
>CD\_NM\_000615.1:254  
CgCctGcgagtctGGtatGCTCTCTGCAGGTGGATATTGTTTTCAAGAGAAACAATATCCACCTGCAGAGAATTTTTTgct  
cgagctggcgaattcc  
>CD\_NM\_000615.1:2584  
CgCctGcgagtctGGtatGCACACACAGAGCCCAACGAGACTTCAAGAGAGTCTCGTTGGGCTCTGTGTGTTTTTTTTgct  
cgagctggcgaattcc  
>CD\_NM\_000615.1:1712  
CgCctGcgagtctGGtatGAATCGACCAGGTGGAGCCATACTTCAAGAGAGTATGGCTCCACCTGGTCGATTTTTTgct  
cgagctggcgaattcc  
>CD\_NM\_000615.1:1304  
CgCctGcgagtctGGtatGATCGCTGACCCCTGAAGAGCATCTTCAAGAGAGATGCTCTTCAGGGTCAGCGACTTTTTTgct  
cgagctggcgaattcc  
>CD\_NM\_000615.1:640  
CgCctGcgagtctGGtatGAAACCATCATCTGGAACACAATTCAGAGATTGTGTTTCCAGATGATGGTTGTTTTTgct  
cgagctggcgaattcc  
>CD\_NM\_018644.1:1003  
CgCctGcgagtctGGtatGAACCGCCATTTGCAATAGACATTCAGAGATGTCTATTGCAAATGGCCGGTGTTTTTTgct  
cgagctggcgaattcc  
>CD\_NM\_018644.3:860  
CgCctGcgagtctGGtatGAAGCCTGGAGCTCTTTCGAAGAGTTCAAGAGACTCTTTCGAAGAGCTCCAGGCTGTTTTTTgct  
cgagctggcgaattcc  
>CD\_NM\_018644.3:662  
CgCctGcgagtctGGtatGACGCGACACCGGCCTCAACTACTTCAAGAGAGTAGTTGAGGCCGGTGTTCGCGCTTTTTTgct  
cgagctggcgaattcc  
>CD\_NM\_018644.3:815  
CgCctGcgagtctGGtatGAAGCCAGCCTGGCGTGGTCTACTTCAAGAGAGTAGACCACGCCAGGCTGGCTGTTTTTTgct  
cgagctggcgaattcc  
>CD\_NM\_018644.3:602  
CgCctGcgagtctGGtatGACTCCACTGGCTGGTGGTGGAGTTCAAGAGACTCCACCACCAGCCAGTGGAGTTTTTgct  
cgagctggcgaattcc  
>CD\_NM\_018644.3:269  
CgCctGcgagtctGGtatGAAGACGGGACATCCTAGCGATCTTCAAGAGAGATCGCTAGGATGTCCCGTCTTTTTTgct  
cgagctggcgaattcc  
>CD\_NM\_018644.3:1034  
CgCctGcgagtctGGtatGCGCCGTCAACCTGCGGCTCATTTTTCAAGAGAAATGAGCCGAGGTTGACGGCATTTTTTTgct  
cgagctggcgaattcc  
>CD\_NM\_018644.3:1187  
CgCctGcgagtctGGtatGATGGCACACACGGACAGAGAAGTTCAAGAGACTTCTCTGTCCGTGTGTGCCACTTTTTTgct  
cgagctggcgaattcc  
>CD\_NM\_018644.3:920

CgCctGcgagtctGGtatGATTCGTGGGTGGCCTGCGGTACTTCAAGAGAGTACCGCAGGCCACCCACGAAGTTTTTGct  
cgagctggcgaattcc  
>CD\_NM\_018644.3:791  
CgCctGcgagtctGGtatGACGCGAGACCTCCCCGCGCAACTTCAAGAGAGTTGCGCGGGAAGGTCTCGCGTTTTTGct  
cgagctggcgaattcc  
>CD\_NM\_018644.3:1226  
CgCctGcgagtctGGtatGAGGCAAGAAGGGCTTCACTGACTTCAAGAGAGTCAGTGAAGCCCTTCTTGCCTTTTTGct  
cgagctggcgaattcc  
>CD\_NM\_018644.3:1172  
CgCctGcgagtctGGtatGAACCAAGATCCTGGTGTGGCACTTCAAGAGAGTGCCACACCAGGATCTTGGTGTTTTTGct  
cgagctggcgaattcc  
>CD\_NM\_018644.3:839  
CgCctGcgagtctGGtatGAGCCGACGACGACAACACCTACTTCAAGAGAGTAGGTGTTGTCGTGTCGCGTTTTTGct  
cgagctggcgaattcc  
>CD\_NM\_018644.3:1124  
CgCctGcgagtctGGtatGCCGAGAACTTGTCAACCCTCAACTTCAAGAGAGTTGAGGGTGACAAGTTCTCGATTTTTGct  
cgagctggcgaattcc  
>CD\_NM\_018644.3:497  
CgCctGcgagtctGGtatGATCCGACACGCTGCCACCATCTTCAAGAGAGATGGTGGGCAGCGTGTGCGACTTTTTGct  
cgagctggcgaattcc  
>CD\_NM\_018644.3:1003  
CgCctGcgagtctGGtatGCCCGCCATTTGCAATAGACATTTCAAGAGAATGTCTATTGCAAATGGCCGGTTTTTGct  
cgagctggcgaattcc  
>CD\_NM\_018644.3:1159  
CgCctGcgagtctGGtatGCGGCAGCCAACCTGCACCAAGATTTCAAGAGAATCTTGGTGCAGTTGGCTGCCTTTTTTGct  
cgagctggcgaattcc  
>CD\_NM\_018644.3:319  
CgCctGcgagtctGGtatGCCATCACTGTCTGGCACCAGAGTTCAAGAGACTCTGGTGCCAGACAGTGATGATTTTTGct  
cgagctggcgaattcc  
>CD\_NM\_018644.3:1060  
CgCctGcgagtctGGtatGCGCGAAGCCAGGCCTACTTCAATTCAAGAGATTGAAGTAGGCCTGGCTTCGCTTTTTTGct  
cgagctggcgaattcc  
>CD\_NM\_018644.3:575  
CgCctGcgagtctGGtatGAGCCAACACGCTGCTGCACGTGTTCAAGAGACACGTGCAGCAGCGTGTGGCCTTTTTGct  
cgagctggcgaattcc  
>CD\_NM\_018644.3:1139  
CgCctGcgagtctGGtatGACTCAACGACCTGGAGCCCAAGTTCAAGAGACTTGGGCTCCAGGTGCGTTGAGTTTTTGct  
cgagctggcgaattcc  
>CD\_NM\_018644.3:434  
CgCctGcgagtctGGtatGATCTGACCGGACATCGTGGAGTTCAAGAGACTCCACGATGTGCGGGTCAGACTTTTTGct  
cgagctggcgaattcc  
>CD\_NM\_018644.3:1214  
CgCctGcgagtctGGtatGACTGGTGAATGAGGGCAAGAAGTTCAAGAGACTTCTTGCCCTCATTACCAGTTTTTGct  
cgagctggcgaattcc  
>CD\_NM\_018644.3:854  
CgCctGcgagtctGGtatGAACCTACAGCCTGGAGCTTCTTCAAGAGAGAAGAGCTCCAGGCTGTAGGTGTTTTTGct  
cgagctggcgaattcc  
>CD\_NM\_018644.3:1113  
CgCctGcgagtctGGtatGCGCAGCCTCCTTCGAGAACTTGTTCAGAGACAAGTTCTCGAAGGAGGCTGTTTTTGct  
cgagctggcgaattcc  
>CD\_NM\_018644.3:1040  
CgCctGcgagtctGGtatGAAACCTGCGGCTCATTCTGCAGTTCAAGAGACTGCAGAATGAGCCGAGGTTGTTTTTGct  
cgagctggcgaattcc  
>CD\_NM\_018644.3:862



CgCctGcgagtctGGtatGACCTGGAGCTCTTCGAAGAGATTTCAAGAGAATCTCTTCGAAGAGCTCCAGGCTTTTTTGct  
cgagctggcgaattcc  
>CD\_NM\_018644.3:664  
CgCctGcgagtctGGtatGACGACACCGGCCTCAACTACACTTCAAGAGAGTGTAGTTGAGGCCGGTGTGCGTTTTTTGct  
cgagctggcgaattcc  
>CD\_NM\_018644.3:1191  
CgCctGcgagtctGGtatGAACACACGGACAGAGAAGCCAGTTCAAGAGACTGGCTTCTCTGTCCGTGTGTGTTTTTTGct  
cgagctggcgaattcc  
>CD\_NM\_018644.3:440  
CgCctGcgagtctGGtatGACGCGACATCGTGGAGGTGGTGTTCGAAGAGACACCACCTCCACGATGTGCGGGTTTTTTGct  
cgagctggcgaattcc  
>CD\_NM\_018644.3:559  
CgCctGcgagtctGGtatGACGAGCTGACGCGCATGGCCAATTCAAGAGATTGGCCATGCGCGTCAGCTCGGTTTTTTGct  
cgagctggcgaattcc  
>CD\_NM\_018644.3:520  
CgCctGcgagtctGGtatGCCGTGGTGACGCCACCTACAGTTCAAGAGACTGTAGGTGGGCGTCACCACGTTTTTTGct  
cgagctggcgaattcc  
>CD\_NM\_018644.3:1130  
CgCctGcgagtctGGtatGCCTTGTACCCCTCAACGACCTGTTCAAGAGACAGGTCGTTGAGGGTGACAAGTTTTTTGct  
cgagctggcgaattcc  
>CD\_NM\_001779:509  
CgCctGcgagtctGGtatGCACGTAACCTCAACCAGTATATATTCAAGAGATATATACTGGTTGAGTTACGTTTTTTGct  
cgagctggcgaattcc  
>CD\_NM\_001779:656  
CgCctGcgagtctGGtatGCTGCACTTATACCATAACCATTTTTCAAGAGAAATGGTATGGGTATAAGTGCATTTTTTTGct  
cgagctggcgaattcc  
>CD\_NM\_001779:737  
CgCctGcgagtctGGtatGCACCAGACAGAACCAACTCCAATTCAAGAGATTGGAGTTGGTTCTGTCTGGTTTTTTGct  
cgagctggcgaattcc  
>CD\_NM\_001779.1:274  
CgCctGcgagtctGGtatGACCTCACTATCTACAACCTAACTTCAAGAGAGTTAAGTTGTAGATAGTGAGGCTTTTTTTGct  
cgagctggcgaattcc  
>CD\_NM\_001779.1:344  
CgCctGcgagtctGGtatGCACCATGAAGTCTTTCTTTATTTCAAGAGAATAAAGAAAGAACTTCATGGTATTTTTTTGct  
cgagctggcgaattcc  
>CD\_NM\_001779.1:698  
CgCctGcgagtctGGtatGCGTGCTGTATATGAATGGTATTTTTCAAGAGAAATACCATTATATACAGCACATTTTTTTGct  
cgagctggcgaattcc  
>CD\_NM\_001779.1:266  
CgCctGcgagtctGGtatGATCAGGTAGCCTCACTATCTACTTCAAGAGAGTAGATAGTGAGGCTACCTGACTTTTTTTGct  
cgagctggcgaattcc  
>CD\_NM\_001779.1:689  
CgCctGcgagtctGGtatGCACATGTATTGTGCTGTATATGTTCAAGAGACATATACAGCACAATACATGTTTTTTTGGct  
cgagctggcgaattcc  
>CD\_NM\_001779.1:571  
CgCctGcgagtctGGtatGATCTTAGCAATCCATTATTTAATTCAAGAGATTAAATAATGGATTGCTAAGAGTTTTTTGct  
cgagctggcgaattcc  
>CD\_NM\_001779.1:656  
CgCctGcgagtctGGtatGCGCACTTATACCATAACCATTATTTCAAGAGATAATGGTATGGGTATAAGTGCATTTTTTTGct  
cgagctggcgaattcc  
>CD\_NM\_001779.1:664  
CgCctGcgagtctGGtatGCACCCATAACCATTAGCAGTAATTTCAAGAGAATTACTGCTAATGGTATGGGTATTTTTTTGct  
cgagctggcgaattcc  
>CD\_NM\_001779.1:338

CgCctGcgagtctGGtatGCACTGATACCATGAAGTTCTTTTTCAAGAGAAAAGAACTTCATGGTATCAGTATTTTTGct  
cgagctggcgaattcc  
>CD\_NM\_001779.1:61  
CgCctGcgagtctGGtatGACCTGCTGCACTGCTTTGGTTTTTCAAGAGAAAACCAAAGCAGTGCAGCAGGCTTTTTGct  
cgagctggcgaattcc  
>CD\_NM\_001779.1:692  
CgCctGcgagtctGGtatGCTGTATTGTGCTGTATATGAATTTCAAGAGAATTCATATACAGCACAATACATTTTTTGct  
cgagctggcgaattcc  
>CD\_NM\_001779.1:272  
CgCctGcgagtctGGtatGCAGCCTCACTATCTACAACCTTATTCAAGAGATAAGTTGTAGATAGTGAGGCTATTTTTGct  
cgagctggcgaattcc  
>CD\_NM\_001779.1:710  
CgCctGcgagtctGGtatGAAATGGTATTCTGAAATGTGACTTCAAGAGAGTCACATTTTCAAGAAATACCATTTTTGct  
cgagctggcgaattcc  
>CD\_NM\_001779.1:488  
CgCctGcgagtctGGtatGCTGTCCCTATGGAGCAATGTAAATTCAAGAGATTTACATTGCTCCATAGGACAATTTTTGct  
cgagctggcgaattcc  
>CD\_NM\_001779.1:560  
CgCctGcgagtctGGtatGCATACAGTGTACTCTTAGCAATTTCAAGAGAATTGCTAAGAGTACTGTATTTTTTTGct  
cgagctggcgaattcc  
>CD\_NM\_001779.1:375  
CgCctGcgagtctGGtatGCCTCTTCCATCTCCACACTAATTCAAGAGATTAGTGTGGGAGATGGAAGAGATTTTTGct  
cgagctggcgaattcc  
>CD\_NM\_001779.1:416  
CgCctGcgagtctGGtatGCAGCATTGAAGTCCAATGCATGTTCAAGAGACATGCATTGGACTTCAATGCTTTTTTTGct  
cgagctggcgaattcc  
>CD\_NM\_001779.1:67  
CgCctGcgagtctGGtatGCGCACTGCTTTGGTTTCATCAGTTCAAGAGACTGATGAAACCAAAGCAGTGCATTTTTGct  
cgagctggcgaattcc  
>CD\_NM\_001779.1:366  
CgCctGcgagtctGGtatGATGCTTGAGTCTCTTCCATCTCTTCAAGAGAGAGATGGAAGAGACTCAAGCACTTTTTGct  
cgagctggcgaattcc  
>CD\_NM\_001779.1:737  
CgCctGcgagtctGGtatGCCAGACAGAACCAACTCCAATTTCAAGAGAATTGGAGTTGGTTCTGTCTGGTTTTTTGct  
cgagctggcgaattcc  
>CD\_NM\_001779.1:425  
CgCctGcgagtctGGtatGCGTCCAATGCATGATACCAGAGTTCAAGAGACTCTGGTATCATGCATTGGACTTTTTTTGct  
cgagctggcgaattcc  
>CD\_NM\_001779.1:499  
CgCctGcgagtctGGtatGCGCAATGTAAACGTAACCTCAACTTCAAGAGAGTTGAGTTACGTTTACATTGCTTTTTTTGct  
cgagctggcgaattcc  
>CD\_NM\_001779.1:650  
CgCctGcgagtctGGtatGAAGATATGCACTTATACCCATATTCAAGAGATATGGGTATAAGTGCATATCTGTTTTTTGct  
cgagctggcgaattcc  
>CD\_NM\_001779.1:482  
CgCctGcgagtctGGtatGCTGGGATTGTCCCTATGGAGCAATTCAAGAGATTGCTCCATAGGACAATCCATTTTTTTGct  
cgagctggcgaattcc  
>CD\_NM\_001779.1:123  
CgCctGcgagtctGGtatGAGGAATGTAACCTTCCATGTACTTCAAGAGAGTACATGGAAAGTTACATTCCTTTTTTTGct  
cgagctggcgaattcc  
>CD\_NM\_001779.1:370  
CgCctGcgagtctGGtatGCTGAGTCTCTTCCATCTCCACTTCAAGAGAGTGGGAGATGGAAGAGACTCAATTTTTTTGct  
cgagctggcgaattcc  
>CD\_NM\_001779.1:356

CgCctGcgagtctGGtatGATTTCTTTATGTGCTTGAGTCTTTCAAGAGAAGACTCAAGCACATAAAGAAAGTTTTTGct  
cgagctggcgaattcc  
>CD\_NM\_001779.1:131  
CgCctGcgagtctGGtatGCACTTTCCATGTACCAAGCAATTTCAAGAGAATTGCTTGGTACATGGAAAGTTTTTTTGct  
cgagctggcgaattcc  
>CD\_NM\_001779.1:440  
CgCctGcgagtctGGtatGCCAGAGCATTACAACAGCCATTTCAAGAGAATGGCTGTTGTAATGCTCTGGTTTTTTTGct  
cgagctggcgaattcc  
>CD\_NM\_001779.1:306  
CgCctGcgagtctGGtatGAAAGATGAGTATGAAATGGAATTTCAAGAGAATTCATTTTCATACTCATCTTCTTTTTTGct  
cgagctggcgaattcc  
>CD\_NM\_000611:396  
CgCctGcgagtctGGtatGCGCCGTCAATTGTTTCATCTGATTTCAAGAGAATCAGATGAACAATTGACGGCTTTTTTTTGct  
cgagctggcgaattcc  
>CD\_NM\_000611:468  
CgCctGcgagtctGGtatGCTGGAAGTTTGAGCATTGCAATTTCAAGAGAATTGCAATGCTCAAACCTCCAATTTTTTGct  
cgagctggcgaattcc  
>CD\_NM\_000611:523  
CgCctGcgagtctGGtatGAAGCTAACGTACTACTGCTGCATTCAAGAGATGCAGCAGTAGTACGTTAGCTCTTTTTTGct  
cgagctggcgaattcc  
>CD\_NM\_000611:641  
CgCctGcgagtctGGtatGAAGCCTGGAGCCTTCATCCCTATTCAAGAGATAGGGATGAAGGCTCCAGGCTTTTTTTTGct  
cgagctggcgaattcc  
>CD\_NM\_000611:395  
CgCctGcgagtctGGtatGAAGCCGTCAATTGTTTCATCTGATTTCAAGAGATCAGATGAACAATTGACGGCTTTTTTTTGct  
cgagctggcgaattcc  
>CD\_NM\_203330.1:341  
CgCctGcgagtctGGtatGCGGTCATAGCCTGCAGTGCTACTTCAAGAGAGTAGCACTGCAGGCTATGACCTTTTTTTTGct  
cgagctggcgaattcc  
>CD\_NM\_203330.1:419  
CgCctGcgagtctGGtatGCGATGCGTGTCTCATTACCAAATTTCAAGAGATTTGGTAATGAGACACGCATCATTTTTTGct  
cgagctggcgaattcc  
>CD\_NM\_203330.1:319  
CgCctGcgagtctGGtatGCCCTGGCTGTCTTCTGCCATTCTTCAAGAGAGAATGGCAGAAGACAGCCAGGATTTTTTTTGct  
cgagctggcgaattcc  
>CD\_NM\_203330.1:583  
CgCctGcgagtctGGtatGATGGGACATCCTTATCAGAGAATTTCAAGAGATTTCTCTGATAAGGATGTCCCACTTTTTTTGct  
cgagctggcgaattcc  
>CD\_NM\_203330.1:539  
CgCctGcgagtctGGtatGATGCAAGAAGGACCTGTGTAACCTTCAAGAGAGTTACACAGGTCCTTCTTGCAGTTTTTTTGct  
cgagctggcgaattcc  
>CD\_NM\_203330.1:473  
CgCctGcgagtctGGtatGATTTGAGCATTGCAATTTCAACTTCAAGAGAGTTGAAATTGCAATGCTCAAACCTTTTTTGct  
cgagctggcgaattcc  
>CD\_NM\_203330.1:357  
CgCctGcgagtctGGtatGCGCTACAACGTCCCTAACCCAATTTCAAGAGATTTGGGTTAGGACAGTTGTAGCATTTTTTTTGct  
cgagctggcgaattcc  
>CD\_NM\_203330.1:317  
CgCctGcgagtctGGtatGAGTCCTGGCTGTCTTCTGCCATTTCAAGAGAATGGCAGAAGACAGCCAGGACGTTTTTTTGct  
cgagctggcgaattcc  
>CD\_NM\_203330.1:621  
CgCctGcgagtctGGtatGATGACTCCATTTCTGGCAGCAGTTCAAGAGACTGCTGCCAGAAATGGAGTCACTTTTTTTTGct  
cgagctggcgaattcc  
>CD\_NM\_203330.1:642

CgCtGcgagtctGGtatGACCTGGAGCCTTCATCCCTAAGTTCAAGAGACTTAGGGATGAAGGCTCCAGGCTTTTTTGct  
cgagctggcgaattcc  
>CD\_NM\_203330.1:328  
CgCtGcgagtctGGtatGCCTTCTGCCATTCAGGTCATAGTTCAAGAGACTATGACCTGAATGGCAGAAGATTTTTGct  
cgagctggcgaattcc  
>CD\_NM\_203330.1:443  
CgCtGcgagtctGGtatGCGGGTTACAAGTGTATAACAAGTTCAAGAGACTTGTATACACTTGTAACCCATTTTTGct  
cgagctggcgaattcc  
>CD\_NM\_203330.1:397  
CgCtGcgagtctGGtatGACGTCAATTGTTTCATCTGATTTTTCAAGAGAAAATCAGATGAACAATTGACGGTTTTTGct  
cgagctggcgaattcc  
>CD\_NM\_203330.1:467  
CgCtGcgagtctGGtatGCTGGAAGTTGAGCATTGCAATTTCAAGAGAATTGCAATGCTCAAACCTCCAATTTTTGct  
cgagctggcgaattcc  
>CD\_NM\_203330.1:581  
CgCtGcgagtctGGtatGCGGTGGGACATCCTTATCAGAGTTCAAGAGACTCTGATAAGGATGTCCCACCATTTTTGct  
cgagctggcgaattcc  
>CD\_NM\_203330.1:641  
CgCtGcgagtctGGtatGCGCCTGGAGCCTTCATCCCTAATTCAGAGATTAGGGATGAAGGCTCCAGGCTTTTTTGct  
cgagctggcgaattcc  
>CD\_NM\_203330.1:395  
CgCtGcgagtctGGtatGCGCCGTCAATTGTTTCATCTGATTTCAAGAGAATCAGATGAACAATTGACGGCTTTTTTGct  
cgagctggcgaattcc  
>CD\_NM\_203330.1:432  
CgCtGcgagtctGGtatGCTTACCAAAGCTGGGTACAAGTTCAAGAGACTTGTAACCCAGCTTTGGTAATTTTTTGct  
cgagctggcgaattcc  
>CD\_NM\_203330.1:544  
CgCtGcgagtctGGtatGCGAAGGACCTGTGTAACCTTAATTCAGAGATTAAAGTTACACAGGTCTTCTTTTTTGct  
cgagctggcgaattcc  
>CD\_NM\_203330.1:442  
CgCtGcgagtctGGtatGATGGGTACAAGTGTATAACAATTCAGAGATTGTTATACACTTGTAACCCAGTTTTTGct  
cgagctggcgaattcc  
>CD\_NM\_203330.1:520  
CgCtGcgagtctGGtatGCTGAGCTAACGTACTACTGCTGTTCAAGAGACAGCAGTAGTACGTTAGCTCATTTTTTGct  
cgagctggcgaattcc  
>CD\_NM\_203330.1:605  
CgCtGcgagtctGGtatGCACAGTTCTTCTGCTGGTGACTTTCAAGAGAAGTCACCAGCAGAAGAACTGTTTTTTGct  
cgagctggcgaattcc  
>CD\_NM\_203330.1:611  
CgCtGcgagtctGGtatGCCTTCTGCTGGTGACTCCATTTTTCAAGAGAAAATGGAGTCACCAGCAGAAGATTTTTGct  
cgagctggcgaattcc  
>CD\_NM\_203330.1:550  
CgCtGcgagtctGGtatGCCCTGTGTAACCTTAACGAACATTCAGAGATGTTTCGTTAAAGTTACACAGGTTTTTTGct  
cgagctggcgaattcc  
>CD\_NM\_203330.1:308  
CgCtGcgagtctGGtatGACTGCTGCTCGTCCCTGGCTGTCTTCAAGAGAGACAGCCAGGACGAGCAGCAGCTTTTTGct  
cgagctggcgaattcc  
>CD\_NM\_203330.1:468  
CgCtGcgagtctGGtatGCGGAAGTTGAGCATTGCAATTTCAAGAGAAAATGCAATGCTCAAACCTCCATTTTTGct  
cgagctggcgaattcc  
>CD\_NM\_203330.1:440  
CgCtGcgagtctGGtatGCGCTGGGTACAAGTGTATAACTTCAAGAGAGTTATACACTTGTAACCCAGCTTTTTTGct  
cgagctggcgaattcc  
>CD\_NM\_203330.1:454

CgCctGcgagtctGGtatGCGTATAACAAGTGTGGAAAGTTTTCAAGAGAACTTCCAACACTTGTATACATTTTTTGct  
cgagctggcgaattcc  
>CD\_NM\_000212:219  
CgCctGcgagtctGGtatGCAGGAGAATCTGCTGAAGGATATTTCAAGAGATATCCTTCAGCAGATTCTCCTTTTTTTGct  
cgagctggcgaattcc  
>CD\_NM\_000212:374  
CgCctGcgagtctGGtatGACGGCCAGATGATTCGAAGAATTTCAAGAGAATTTCTTCGAATCATCTGGCCGGTTTTTGct  
cgagctggcgaattcc  
>CD\_NM\_000212:883  
CgCctGcgagtctGGtatGCGGCAGGCATTGTCCAGCCTAATTTCAAGAGATTAGGCTGGACAATGCCTGCCATTTTTTGct  
cgagctggcgaattcc  
>CD\_NM\_000212:1326  
CgCctGcgagtctGGtatGCAGGAGAAGTCCTTTACCATAATTTCAAGAGATTATGGTAAAGGACTTCTCCTTTTTTTGct  
cgagctggcgaattcc  
>CD\_NM\_000212:1119  
CgCctGcgagtctGGtatGATCCAGCTCATTTGTTGATGCTTTTTCAAGAGAAAGCATCAACAATGAGCTGGAGTTTTTGct  
cgagctggcgaattcc  
>CD\_NM\_000212.2:1036  
CgCctGcgagtctGGtatGCGTAGTCAATCTCTATCAGAACTTTCAAGAGAGTTCTGATAGAGATTGACTACATTTTTTGct  
cgagctggcgaattcc  
>CD\_NM\_000212.2:2128  
CgCctGcgagtctGGtatGAATCCTGTATGTGGTAGAAGAGTTCAAGAGACTCTTCTACCACATACAGGATTTTTTGct  
cgagctggcgaattcc  
>CD\_NM\_000212.2:883  
CgCctGcgagtctGGtatGAGCAGGCATTGTCCAGCCTAATTTCAAGAGAATTAGGCTGGACAATGCCTGCCTTTTTTGct  
cgagctggcgaattcc  
>CD\_NM\_000212.2:1114  
CgCctGcgagtctGGtatGCGTCCCTCCAGCTCATTTGTTGATTTCAAGAGAATCAACAATGAGCTGGAGGACATTTTTTGct  
cgagctggcgaattcc  
>CD\_NM\_000212.2:2017  
CgCctGcgagtctGGtatGATCAGTGAAAGAGCTTAAGGACTTTCAAGAGAGTCCTTAAGCTCTTTCACTGACTTTTTTGct  
cgagctggcgaattcc  
>CD\_NM\_000212.2:376  
CgCctGcgagtctGGtatGACCAGATGATTCGAAGAATTTCTTCAAGAGAGAAATTTCTTCGAATCATCTGGCTTTTTTGct  
cgagctggcgaattcc  
>CD\_NM\_000212.2:217  
CgCctGcgagtctGGtatGAAAGGAGAATCTGCTGAAGGATTTCAAGAGAATCCTTCAGCAGATTCTCCTTCTTTTTTGct  
cgagctggcgaattcc  
>CD\_NM\_000212.2:2276  
CgCctGcgagtctGGtatGCTCGCTAAATTTGAGGAAGAACTTTCAAGAGAGTTCTTCTCAAATTTAGCGAATTTTTTGct  
cgagctggcgaattcc  
>CD\_NM\_000212.2:1040  
CgCctGcgagtctGGtatGATCAATCTCTATCAGAACTATATTTCAAGAGATATAGTTCTGATAGAGATTGACTTTTTTGct  
cgagctggcgaattcc  
>CD\_NM\_000212.2:1835  
CgCctGcgagtctGGtatGCAGTGTGAATGTGGCAGCTGTGTTCAAGAGACACAGCTGCCACATTCACACTTTTTTTGct  
cgagctggcgaattcc  
>CD\_NM\_000212.2:487  
CgCctGcgagtctGGtatGAATCCAGAACCTGGGTACCAAGTTCAAGAGACTTGGTACCAGGTTCTGGATTTTTTTGct  
cgagctggcgaattcc  
>CD\_NM\_000212.2:1737  
CgCctGcgagtctGGtatGACCTGTGTGACTCCGACTGGACTTTCAAGAGAGTCCAGTCCGAGTCACACAGGCTTTTTTGct  
cgagctggcgaattcc  
>CD\_NM\_000212.2:1595

CgCctGcgagtctGGtatGAAGTGCCCTCTGTGGTCAATGTGTTCAAGAGACACATTGACCACAGAGGCACTCTTTTTGct  
cgagctggcgaattcc  
>CD\_NM\_000212.2:2224  
CgCctGcgagtctGGtatGCGCCGCCCTGCTCATCTGGAAATTC AAGAGATTTCCAGATGAGCAGGGCGGCATTTTTGct  
cgagctggcgaattcc  
>CD\_NM\_000212.2:1409  
CgCctGcgagtctGGtatGAAGGCCCAAGCTGAACCTAATATTC AAGAGATATTAGGTTTCAGCTTGGGCCTGTTTTGct  
cgagctggcgaattcc  
>CD\_NM\_000212.2:919  
CgCctGcgagtctGGtatGCGTTGGTAGTGACAATCATTACTTCAAGAGAGTAATGATTGTCACTACCAACATTTTTGct  
cgagctggcgaattcc  
>CD\_NM\_000212.2:1608  
CgCctGcgagtctGGtatGATCAATGTGTCTGCCACAGCAGTTCAAGAGACTGCTGTGGCAGACACATTGACTTTTTGct  
cgagctggcgaattcc  
>CD\_NM\_000212.2:2050  
CgCctGcgagtctGGtatGCGCAGTGAATTGTACCTATAAGTTCAAGAGACTTATAGGTACAATTCACTGCATTTTTGct  
cgagctggcgaattcc  
>CD\_NM\_000212.2:2102  
CgCctGcgagtctGGtatGCACTATGAAGATTCTAGTGGAAATTC AAGAGATTCCTACTAGAATCTTCATAGTATTTTTGct  
cgagctggcgaattcc  
>CD\_NM\_000212.2:700  
CgCctGcgagtctGGtatGACGCTTCAATGAGGAAGTGAAGTTCAAGAGACTTCACTTCCTCATTGAAGCGGTTTTGct  
cgagctggcgaattcc  
>CD\_NM\_000212.2:923  
CgCctGcgagtctGGtatGAGTAGTGACAATCATTACTCTGTTCAAGAGACAGAGTAATGATTGTCACTACCTTTTTGct  
cgagctggcgaattcc  
>CD\_NM\_000212.2:457  
CgCctGcgagtctGGtatGATCTTACTCCATGAAGGATGATTTCAAGAGAATCATCCTTCATGGAGTAAGACTTTTTGct  
cgagctggcgaattcc  
>CD\_NM\_000212.2:905  
CgCctGcgagtctGGtatGAACGGGCAGTGTCTGTTGGTATTCAAGAGATACCAACATGACACTGCCCGTCTTTTTGct  
cgagctggcgaattcc  
>CD\_NM\_000212.2:1591  
CgCctGcgagtctGGtatGAGGCGAGTGCCTCTGTGGTCAATTC AAGAGATTGACCACAGAGGCACTCGCCTTTTGct  
cgagctggcgaattcc  
>CD\_NM\_000212.2:205  
CgCctGcgagtctGGtatGCCGCTGTGACCTGAAGGAGAATTTCAAGAGAATTCCTCCTCAGGTCACAGCGATTTTTGct  
cgagctggcgaattcc  
>CD\_NM\_000212.2:1593  
CgCctGcgagtctGGtatGACGAGTGCCTCTGTGGTCAATGTTC AAGAGACATTGACCACAGAGGCACTCGCTTTTTGct  
cgagctggcgaattcc  
>CD\_NM\_000212.2:943  
CgCctGcgagtctGGtatGCGCCTCCACTACCATGGATTATTTCAAGAGAATAATCCATGGTAGTGGAGGCATTTTTGct  
cgagctggcgaattcc  
>CD\_NM\_000212.2:1928  
CgCctGcgagtctGGtatGCAGAAAGAAATGTGTGGAGTGTATTCAAGAGATACACTCCACACATTCTTTCTTTTTGct  
cgagctggcgaattcc  
>CD\_NM\_000450:221  
CgCctGcgagtctGGtatGAGCCAGTGCTTATTGTGTCAGCAATTC AAGAGATTGCTGACAATAAGCACTGGCCTTTTTGct  
cgagctggcgaattcc  
>CD\_NM\_000450:866  
CgCctGcgagtctGGtatGCGGGTTTCGTGGAATGTTTCCAATTC AAGAGATTGGAAACATTCCACGAACCCATTTTTGct  
cgagctggcgaattcc  
>CD\_NM\_000450:1030

CgCtGcgagtctGGtatGAGGCCGTCCGCCAGCCTCAGAATTCAAGAGATTCTGAGGCTGGCGGACGGCCCTTTTTGct  
cgagctggcgaattcc  
>CD\_NM\_000450:1078  
CgCtGcgagtctGGtatGATGCTGGAGAGTTCACCTTCAATTCAAGAGATTGAAGGTGAACCTCCAGCAGTTTTTgct  
cgagctggcgaattcc  
>CD\_NM\_000450:1493  
CgCtGcgagtctGGtatGAAGCTGTGAGGAGGGATTTGAATTCAAGAGATTCAAATCCCTCCTCACAGCTGTTTTTgct  
cgagctggcgaattcc  
>CD\_NM\_000450:1807  
CgCtGcgagtctGGtatGATGGACTCTCCCTCCTGACATTTTCAAGAGAAATGTCAGGAGGGAGAGTCCAGTTTTTgct  
cgagctggcgaattcc  
>CD\_NM\_000450:856  
CgCtGcgagtctGGtatGCTCCAGCCAATGGGTTCGTGGATTCAAGAGATCCACGAACCCATTGGCTGGATTTTTTgct  
cgagctggcgaattcc  
>CD\_NM\_000450:860  
CgCtGcgagtctGGtatGCGCCAATGGGTTCGTGGAATGTTTCAAGAGAACATTCCACGAACCCATTGGCTTTTTTgct  
cgagctggcgaattcc  
>CD\_NM\_000450.1:577  
CgCtGcgagtctGGtatGCGTAGAGACCATCAATAATTACTTCAAGAGAGTAATTATTGATGGTCTCTACATTTTTTgct  
cgagctggcgaattcc  
>CD\_NM\_000450.1:966  
CgCtGcgagtctGGtatGCTCAGTGACCTCATCTGGGAATTCAAGAGATCCCAGATGAGGTACACTGAATTTTTTgct  
cgagctggcgaattcc  
>CD\_NM\_000450.1:285  
CgCtGcgagtctGGtatGCGTACCTAACTCCATATTGAGTTCAAGAGACTCAATATGGAGTTTAGGTACTTTTTTgct  
cgagctggcgaattcc  
>CD\_NM\_000450.1:126  
CgCtGcgagtctGGtatGAACAGTTTCTCTCAGCTCTCACTTCAAGAGAGTGAGAGCTGAGAGAACTGTGTTTTTgct  
cgagctggcgaattcc  
>CD\_NM\_000450.1:148  
CgCtGcgagtctGGtatGCTTGGTGCTTCTCATTAAGAGTTCAAGAGACTCTTTAATGAGAAGCACCAAATTTTTTgct  
cgagctggcgaattcc  
>CD\_NM\_000450.1:1807  
CgCtGcgagtctGGtatGCGGACTCTCCCTCCTGACATTATTCAAGAGATAATGTCAGGAGGGAGAGTCCATTTTTTgct  
cgagctggcgaattcc  
>CD\_NM\_000450.1:351  
CgCtGcgagtctGGtatGCTGTGTGGGTCTGGGTAGGAACTTCAAGAGAGTTCCTACCCAGACCCACACATTTTTTgct  
cgagctggcgaattcc  
>CD\_NM\_000450.1:696  
CgCtGcgagtctGGtatGATCACCCACTGGGAACTTCAAGAGACTGAAGTTTCCCAGTGGGTGACTTTTTTgct  
cgagctggcgaattcc  
>CD\_NM\_000450.1:729  
CgCtGcgagtctGGtatGACTGCTCTATCAGCTGTGATAGTTCAAGAGACTATCACAGCTGATAGAGCAGTTTTTgct  
cgagctggcgaattcc  
>CD\_NM\_000450.1:226  
CgCtGcgagtctGGtatGCGCTTATTGTCAGCAAAGGTACTTCAAGAGAGTACCTTTGCTGACAATAAGCATTTTTTgct  
cgagctggcgaattcc  
>CD\_NM\_000450.1:1790  
CgCtGcgagtctGGtatGACTGGACTTCTGCTGCTGGACTTCAAGAGAGTCCAGCAGCAGAAAGTCCAGCTTTTTTgct  
cgagctggcgaattcc  
>CD\_NM\_000450.1:221  
CgCtGcgagtctGGtatGACCAGTGCTTATTGTCAGCAAATTCAAGAGATTTGCTGACAATAAGCACTGGCTTTTTTgct  
cgagctggcgaattcc  
>CD\_NM\_000450.1:1083

CgCctGcgagtctGGtatGAAGAGTTCACCTTCAAATCATCTTCAAGAGAGATGATTTGAAGGTGAACTCTCTTTTTGct  
cgagctggcgaattcc  
>CD\_NM\_000450.1:139  
CgCctGcgagtctGGtatGCGCTCTCACTTTGGTGTCTCTTCAAGAGAGAGAAGCACCAAAGTGAGAGCTTTTTTgct  
cgagctggcgaattcc  
>CD\_NM\_000450.1:914  
CgCctGcgagtctGGtatGCCCTGTACATTTGACTGTGAAGTTCAAGAGACTTTCACAGTCAAATGTACAGGTTTTTgct  
cgagctggcgaattcc  
>CD\_NM\_000450.1:445  
CgCctGcgagtctGGtatGATGCGTGAGATCTACATCAAGTTCAAGAGACTTGATGTAGATCTCCACGCAGTTTTTgct  
cgagctggcgaattcc  
>CD\_NM\_000450.1:856  
CgCctGcgagtctGGtatGCCAGCCAATGGGTTTCGTGGAATTCAGAGATTCACGAACCCATTGGCTGGATTTTTgct  
cgagctggcgaattcc  
>CD\_NM\_000450.1:145  
CgCctGcgagtctGGtatGAACTTTGGTGTCTCATTAAATTCAGAGATTTAATGAGAAGCACCAAAGTGTTTTTgct  
cgagctggcgaattcc  
>CD\_NM\_000450.1:702  
CgCctGcgagtctGGtatGAACTGGGAACTTCAGCTACAATTCAGAGATTTGATGCTGAAGTTCCAGTGTTTTTgct  
cgagctggcgaattcc  
>CD\_NM\_000450.1:370  
CgCctGcgagtctGGtatGCACCCAGAAACCTCTGACAGAATTCAGAGATTTCTGTGAGAGGTTTCTGGGTTTTTgct  
cgagctggcgaattcc  
>CD\_NM\_000450.1:1892  
CgCctGcgagtctGGtatGCGCTGCCAAAGCCTTGAATCAGTTCAAGAGACTGATTCAGGCTTTGGCAGCTTTTTTgct  
cgagctggcgaattcc  
>CD\_NM\_000450.1:560  
CgCctGcgagtctGGtatGCGTGGCCACGGTGAATGTGTAGTTCAAGAGACTACACATTCACCGTGGCCACTTTTTTgct  
cgagctggcgaattcc  
>CD\_NM\_000450.1:321  
CgCctGcgagtctGGtatGCTTACTGGATTGGAATCAGAAATTCAGAGATTTCTGATTCCAATCCAGTAATTTTTTgct  
cgagctggcgaattcc  
>CD\_NM\_000450.1:124  
CgCctGcgagtctGGtatGCTCACAGTTTCTCTCAGCTCTCTTCAAGAGAGAGAGCTGAGAGAACTGTGAATTTTTTgct  
cgagctggcgaattcc  
>CD\_NM\_000450.1:1664  
CgCctGcgagtctGGtatGCAGTTCGCCTGTCTGAAGGATTTCAAGAGAATCCTTCAGGACAGGCGAACTTTTTTgct  
cgagctggcgaattcc  
>CD\_NM\_000655:194  
CgCctGcgagtctGGtatGCCGACTGCTGGACTTACCATTTTTCAAGAGAAATGGTAAGTCCAGCAGTCGGTTTTTgct  
cgagctggcgaattcc  
>CD\_NM\_000655:202  
CgCctGcgagtctGGtatGATGGACTTACCATTATTCTGAATTCAGAGATTCAGAATAATGGTAAGTCCAGTTTTTgct  
cgagctggcgaattcc  
>CD\_NM\_000655:256  
CgCctGcgagtctGGtatGATGCCGAGACAATTACACAGATTTCAAGAGAATCTGTGTAATTGTCTCGGCAGTTTTTgct  
cgagctggcgaattcc  
>CD\_NM\_000655:464  
CgCctGcgagtctGGtatGAAGGACTGCGTGGAGATCTATATTCAGAGATATAGATCTCCACGCAGTCTCTTTTTTgct  
cgagctggcgaattcc  
>CD\_NM\_000655:587  
CgCctGcgagtctGGtatGAGCCATGGAGAATGTGTAGAAATTCAGAGATTTCTACACATTCTCCATGGCCTTTTTTgct  
cgagctggcgaattcc  
>CD\_NM\_000655:1012



CgCctGcgagtctGGtatGATGGTCAAATCCTAGTCCAATATTCAAGAGATATTGGACTAGGATTTGACCAGTTTTTGct  
cgagctggcgaattcc  
>CD\_NM\_000655.116  
CgCctGcgagtctGGtatGCCCCAGAGGGACTTATGGAACATTCAAGAGATGTTCCATAAGTCCCTCTGGGTTTTTTGct  
cgagctggcgaattcc  
>CD\_NM\_000655.2:202  
CgCctGcgagtctGGtatGCGGACTTACCATTATTCTGAAATTCAAGAGATTTTCCAGATAATGGTAAGTCCATTTTTGct  
cgagctggcgaattcc  
>CD\_NM\_000655.2:394  
CgCctGcgagtctGGtatGCCCAACAAATCTCTTACTGAAGTTCAAGAGACTTCAGTAAGAGATTTGTTGGTTTTTTGct  
cgagctggcgaattcc  
>CD\_NM\_000655.2:760  
CgCctGcgagtctGGtatGCTCAGCTGCTCTGAAGGAACAATTCAAGAGATGTTTCCTCAGAGCAGCTGAATTTTTGct  
cgagctggcgaattcc  
>CD\_NM\_000655.2:597  
CgCctGcgagtctGGtatGCTGTGTAGAAATCATCAATAATTTCAAGAGAATTATTGATGATTTCTACACATTTTTGct  
cgagctggcgaattcc  
>CD\_NM\_000655.2:823  
CgCctGcgagtctGGtatGCACTGGTCATCTCCAGAACCAATTCAAGAGATGGTTCCTGGAGATGACCAGTTTTTTGct  
cgagctggcgaattcc  
>CD\_NM\_000655.2:116  
CgCctGcgagtctGGtatGACCAGAGGGACTTATGGAACATTTCAAGAGAATGTTCCATAAGTCCCTCTGGGTTTTTTGct  
cgagctggcgaattcc  
>CD\_NM\_000655.2:965  
CgCctGcgagtctGGtatGATGAGTTAATTGGGAAGAAGAATTCAAGAGATTCCTTCTCCAATTAATCAGTTTTTTGct  
cgagctggcgaattcc  
>CD\_NM\_000655.2:468  
CgCctGcgagtctGGtatGATGCGTGGAGATCTATATCAAGTTCAAGAGACTTGATATAGATCTCCACGCAGTTTTTTGct  
cgagctggcgaattcc  
>CD\_NM\_000655.2:232  
CgCctGcgagtctGGtatGCACTGGCAAAGGGCTAGAAGATTTCAAGAGAATCTTCTAGCCCTTTGCCAGTTTTTTGct  
cgagctggcgaattcc  
>CD\_NM\_000655.2:1009  
CgCctGcgagtctGGtatGCTCTGGTCAAATCCTAGTCCAATTTCAAGAGATTTGGACTAGGATTTGACCAGATTTTTTTGct  
cgagctggcgaattcc  
>CD\_NM\_000655.2:114  
CgCctGcgagtctGGtatGAACCCAGAGGGACTTATGGAACTTCAAGAGAGTTCATAAGTCCCTCTGGGTGTTTTTTGct  
cgagctggcgaattcc  
>CD\_NM\_000655.2:853  
CgCctGcgagtctGGtatGATGATTCAGTGTGAGCCTCTATTTCAAGAGAATAGAGGCTCACACTGAATCACTTTTTTTGct  
cgagctggcgaattcc  
>CD\_NM\_000655.2:268  
CgCctGcgagtctGGtatGCACACAGATTTAGTTGCCATACTTCAAGAGAGTATGGCAACTAAATCTGTGTATTTTTTTGct  
cgagctggcgaattcc  
>CD\_NM\_000655.2:1050  
CgCctGcgagtctGGtatGCAGTTTCTCAATGATTAAGGAGTTCAAGAGACTCCTTAATCATTGAGAACTTTTTTTGct  
cgagctggcgaattcc  
>CD\_NM\_000655.2:911  
CgCctGcgagtctGGtatGACCTGGCCAGCTTTCAGCTTTACTTCAAGAGAGTAAAGCTGAAGCTGGCCAGGGTTTTTTGct  
cgagctggcgaattcc  
>CD\_NM\_000655.2:719  
CgCctGcgagtctGGtatGATCACCCTTTGGGAACTTTCAGTTCAAGAGACTGAAGTTTCCCAAAGGGTGAATTTTTTTGct  
cgagctggcgaattcc  
>CD\_NM\_000655.2:859

CgCctGcgagtctGGtatGAAGTGTGAGCCTCTATCAGCACTTCAAGAGAGTGTGATAGAGGCTCACACTGTTTTTGct  
cgagctggcgaattcc  
>CD\_NM\_000655.2:1185  
CgCctGcgagtctGGtatGCAGTATGAATGACCCATATTAATTCAAGAGATTAATATGGGTCATTCATACTTTTTTTGct  
cgagctggcgaattcc  
>CD\_NM\_000655.2:944  
CgCctGcgagtctGGtatGACTTCATCTGCTCAGAAGGAACCTCAAGAGAGTTCCTTCTGAGCAGATGAAGTTTTTTGct  
cgagctggcgaattcc  
>CD\_NM\_000655.2:168  
CgCctGcgagtctGGtatGCTGTGATTTCTTGGCACATCATTTCAAGAGAATGATGTGCCAGGAAATCACAATTTTTTGct  
cgagctggcgaattcc  
>CD\_NM\_000655.2:165  
CgCctGcgagtctGGtatGATGTTGTGATTTCTTGGCACATTTCAAGAGAATGTGCCAGGAAATCACAACAGTTTTTTGct  
cgagctggcgaattcc  
>CD\_NM\_000655.2:1166  
CgCctGcgagtctGGtatGCAGGCAAGAAATCCAAGAGAAGTTCAAGAGACTTCTCTTGGATTTCTTGCCTTTTTTTGct  
cgagctggcgaattcc  
>CD\_NM\_000655.2:952  
CgCctGcgagtctGGtatGCGCTCAGAAGGAAC TGAGTTAATTCAAGAGATTAAC T CAGTTCTTCTGAGCATTTTTTGct  
cgagctggcgaattcc  
>CD\_NM\_000655.2:836  
CgCctGcgagtctGGtatGAAGAACCAACCTGTCAAGTGATTTCAAGAGAATCACTTGACAGGTTGGTCTGTTTTTTGct  
cgagctggcgaattcc  
>CD\_NM\_000655.2:258  
CgCctGcgagtctGGtatGACGAGACAATTACACAGATTTATTCAAGAGATAAATCTGTGTAATTGTCTCGGTTTTTTGct  
cgagctggcgaattcc  
>CD\_NM\_000655.2:1004  
CgCctGcgagtctGGtatGATGGAATCTGGTCAAATCCTAGTTCAAGAGACTAGGATTTGACCAGATTCAGTTTTTTGct  
cgagctggcgaattcc  
>CD\_NM\_003005:132  
CgCctGcgagtctGGtatGCTCCAGAGAGTGGTCTTTGGAATTTCAAGAGATTCCAAAGACCACTCTCTGGAATTTTTTGct  
cgagctggcgaattcc  
>CD\_NM\_003005:1367  
CgCctGcgagtctGGtatGCGCCGATATAGTTCGGTGTGATTTCAAGAGAATCACACCGAACTATATCGGCTTTTTTTGct  
cgagctggcgaattcc  
>CD\_NM\_003005:1437  
CgCctGcgagtctGGtatGCGCCAGGATCTCCAGTTCCAATTTCAAGAGATTGGAAC TGGGAGATCCTGGCATTTTTTTGct  
cgagctggcgaattcc  
>CD\_NM\_003005:2204  
CgCctGcgagtctGGtatGCTGCTCAGAACTACATGTTAATTTCAAGAGAATTAACATGTAGTTCTGAGCATTTTTTTGct  
cgagctggcgaattcc  
>CD\_NM\_003005:2459  
CgCctGcgagtctGGtatGCGGGACGCTCCTGGCTTTGCTATTCAAGAGATAGCAAAGCCAGGAGCGTCCATTTTTTGct  
cgagctggcgaattcc  
>CD\_NM\_003005:2566  
CgCctGcgagtctGGtatGATGCATTTGACCCGAGTCCTTATTCAAGAGATAAGGACTCGGGTCAAATGCAGTTTTTTGct  
cgagctggcgaattcc  
>CD\_NM\_003005.2:1503  
CgCctGcgagtctGGtatGCCAGTCAGTCTGCAGCTTCACTTCAAGAGAGTGAAGCTGCAGACTGACTGGTTTTTTGct  
cgagctggcgaattcc  
>CD\_NM\_003005.2:2464  
CgCctGcgagtctGGtatGACTCCTGGCTTTGCTAAGAAAGTTCAAGAGACTTCTTAGCAAAGCCAGGAGCTTTTTTTGct  
cgagctggcgaattcc  
>CD\_NM\_003005.2:174

CgCctGcgagtctGGtatGATGCCCTGATCTCTGAACTAACTTCAAGAGAGTTAGTTCAGAGATCAGGGCACTTTTTTGct  
cgagctggcgaattcc  
>CD\_NM\_003005.2:1557  
CgCctGcgagtctGGtatGATGTGCTACAGTGCTTGGCTACTTCAAGAGAGTAGCCAAGCACTGTAGCACACTTTTTTGct  
cgagctggcgaattcc  
>CD\_NM\_003005.2:945  
CgCctGcgagtctGGtatGCTCAGTCTAGCTGCAGCTTCAAGAGACTGAAGCTGCAGCTAGACTGATTTTTTGct  
cgagctggcgaattcc  
>CD\_NM\_003005.2:2116  
CgCctGcgagtctGGtatGCGGATTCACACTCATAGGAGACTTCAAGAGAGTCTCCTATGAGTGTGAATCCATTTTTTGct  
cgagctggcgaattcc  
>CD\_NM\_003005.2:132  
CgCctGcgagtctGGtatGCCAGAGAGTGGTCTTTGGAATTTCAAGAGAATTCAAAGACCACTCTCTGGATTTTTTGct  
cgagctggcgaattcc  
>CD\_NM\_003005.2:437  
CgCctGcgagtctGGtatGAAGAACTGGGCTGATAATGAACTTCAAGAGAGTTCATTATCAGCCCAGTCTCTTTTTTGct  
cgagctggcgaattcc  
>CD\_NM\_003005.2:1724  
CgCctGcgagtctGGtatGCATTCTTTGTCTGGACCAGAAATTCAGAGATTTCTGGTCCAGACAAAGAATTTTTTGct  
cgagctggcgaattcc  
>CD\_NM\_003005.2:709  
CgCctGcgagtctGGtatGACCTCAACACGTGCTCATGAACTTCAAGAGAGTTCATGAGCACGTGTTGAGGGTTTTTGct  
cgagctggcgaattcc  
>CD\_NM\_003005.2:328  
CgCctGcgagtctGGtatGACTCAATAAGGTCCTACCCTACTTCAAGAGAGTAGGGTAGGACCTTATTGAGGTTTTTGct  
cgagctggcgaattcc  
>CD\_NM\_003005.2:683  
CgCctGcgagtctGGtatGATGAGAGAGTGTGGAGAACTTGTTCAAGAGACAAGTCTCCACACTCTCTCACTTTTTTGct  
cgagctggcgaattcc  
>CD\_NM\_003005.2:644  
CgCctGcgagtctGGtatGCCCTGTTACCCTGGATTCTATGTTCAAGAGACATAGAATCCAGGGTAACAGGATTTTTTGct  
cgagctggcgaattcc  
>CD\_NM\_003005.2:1847  
CgCctGcgagtctGGtatGCGTTCTGACACTCGTGGAGAATTTCAAGAGAATTTCTCCACGAGTGTGAGAACATTTTTTGct  
cgagctggcgaattcc  
>CD\_NM\_003005.2:288  
CgCctGcgagtctGGtatGAAGACTTAGTGGCCATCCAGAATTCAGAGATTTCTGGATGGCCACTAAGTCTGTTTTTGct  
cgagctggcgaattcc  
>CD\_NM\_003005.2:831  
CgCctGcgagtctGGtatGATTCTGGAATCTGGACAAATAATTCAGAGATTTATTTGTCCAGATTCCAGAAGTTTTTGct  
cgagctggcgaattcc  
>CD\_NM\_003005.2:271  
CgCctGcgagtctGGtatGATGCCAGAATCGCTACACAGACTTCAAGAGAGTCTGTGTAGCGATTCTGGCAGTTTTTGct  
cgagctggcgaattcc  
>CD\_NM\_003005.2:618  
CgCctGcgagtctGGtatGCCGAGACCATCGGGAACACTTCAAGAGAGTGTAGTTCCTCCGATGGTCTCGATTTTTTGct  
cgagctggcgaattcc  
>CD\_NM\_003005.2:292  
CgCctGcgagtctGGtatGATTAGTGGCCATCCAGAATAAATTCAGAGATTTATTCTGGATGGCCACTAAGTTTTTGct  
cgagctggcgaattcc  
>CD\_NM\_003005.2:2455  
CgCctGcgagtctGGtatGAGGTGGGACGCTCCTGGCTTTGTTCAAGAGACAAAGCCAGGAGCGTCCCACCCTTTTTTGct  
cgagctggcgaattcc  
>CD\_NM\_003005.2:1671

CgCctGcgagtctGGtatGATCTTGGAAAGTTCAGTTATAATTCAAGAGATTATAACTGGAACCTCCAAGAGTTTTTGct  
cgagctggcgaattcc  
>CD\_NM\_003005.2:2395  
CgCctGcgagtctGGtatGCATCCAGGAAGCCCTGACTTACTTCAAGAGAGTAAGTCAGGGCTTCTTGATATTTTTGct  
cgagctggcgaattcc  
>CD\_NM\_003005.2:319  
CgCctGcgagtctGGtatGCATTGATTACCTCAATAAGGTCTTCAAGAGAGACCTTATTGAGGTAATCAATTTTTTTGct  
cgagctggcgaattcc  
>CD\_NM\_003005.2:1617  
CgCctGcgagtctGGtatGCTCCCTGCACACCTTTGCTAAGTTCAAGAGACTTAGCAAAGGTGTGCAGGGAATTTTTGct  
cgagctggcgaattcc  
>CD\_NM\_003005.2:1368  
CgCctGcgagtctGGtatGACGATATAGTTCGGTGTGATAATTCAAGAGATTATCACACCGAACTATATCGGTTTTTGct  
cgagctggcgaattcc  
>CD\_NM\_003005.2:1358  
CgCctGcgagtctGGtatGATGAGAGGAGCCGATATAGTTCTTCAAGAGAGAACTATATCGGCTCCTCTCAGTTTTTGct  
cgagctggcgaattcc  
>CD\_NM\_003005.2:1886  
CgCctGcgagtctGGtatGCGTCATTTCTCTTGTAAACAATGTTCAAGAGACATTGTTACAAGAGAAATGACATTTTTGct  
cgagctggcgaattcc  
>CD\_NM\_001780:149  
CgCctGcgagtctGGtatGCGCGCCTGTGCAGTGGGACTGATTCAAGAGATCAGTCCCCTGCACAGGCGCATTTTTGct  
cgagctggcgaattcc  
>CD\_NM\_001780:310  
CgCctGcgagtctGGtatGATGCAAGGAGAACTATTGTCTTTTTCAAGAGAAAGACAATAGTTCTCCTTGCAGTTTTTGct  
cgagctggcgaattcc  
>CD\_NM\_001780:385  
CgCctGcgagtctGGtatGCGCCATTGCTGGCTATGTGTTTTTCAAGAGAAAACACATAGCCAGCAATGGCTTTTTTGct  
cgagctggcgaattcc  
>CD\_NM\_001780:390  
CgCctGcgagtctGGtatGCTGCTGGCTATGTGTTTAGAGATTCAAGAGATCTCTAAACACATAGCCAGCAATTTTTGct  
cgagctggcgaattcc  
>CD\_NM\_001780:413  
CgCctGcgagtctGGtatGCAGGTGATGTCAGAGTTTAATATTCAAGAGATATTAACCTCTGACATCACCTTTTTTTGct  
cgagctggcgaattcc  
>CD\_NM\_001780:608  
CgCctGcgagtctGGtatGATGGGCTGTGGGATTAATTTCAATCAAGAGATGAAATTAATCCCACAGCCCCTTTTTGct  
cgagctggcgaattcc  
>CD\_NM\_001780.3:405  
CgCctGcgagtctGGtatGCAGAGATAAGGTGATGTCAGAGTTCAAGAGACTCTGACATCACCTTATCTCTATTTTTGct  
cgagctggcgaattcc  
>CD\_NM\_001780.3:390  
CgCctGcgagtctGGtatGCGCTGGCTATGTGTTTAGAGATTTCAAGAGAATCTCTAAACACATAGCCAGCATTTTTTGct  
cgagctggcgaattcc  
>CD\_NM\_001780.3:186  
CgCctGcgagtctGGtatGAGCACAGCTTGTCCTGAGTCAGTTCAAGAGACTGACTCAGGACAAGCTGTGCCTTTTTGct  
cgagctggcgaattcc  
>CD\_NM\_001780.3:108  
CgCctGcgagtctGGtatGCTGTGTGAAGTCTTGCTCTACTTCAAGAGAGTAGAGCAAGAACTTCACACATTTTTTGct  
cgagctggcgaattcc  
>CD\_NM\_001780.3:615  
CgCctGcgagtctGGtatGCGGGATTAATTTCAACGAGAAGTTCAAGAGACTTCTCGTTGAAATTAATCCCATTTTTGct  
cgagctggcgaattcc  
>CD\_NM\_001780.3:441

CgCctGcgagtctGGtatGACGGCAGCAGATGGAGAATTACTTCAAGAGAGTAATTCTCCATCTGCTGCCGGTTTTTGct  
cgagctggcgaattcc  
>CD\_NM\_001780.3:258  
CgCctGcgagtctGGtatGAGCAGTGGGTGTCCTTCTTCTTCAAGAGAGAAGAGGAAGACACCCACTGCGTTTTTGct  
cgagctggcgaattcc  
>CD\_NM\_001780.3:348  
CgCctGcgagtctGGtatGATTTCTGTCTCTTATCATGTTGTTCAAGAGACAACATGATAAGAGACAGAAAGTTTTTGct  
cgagctggcgaattcc  
>CD\_NM\_001780.3:614  
CgCctGcgagtctGGtatGATGGGATTAATTTCAACGAGAATTCAAGAGATTCTCGTTGAAATTAATCCCACTTTTTGct  
cgagctggcgaattcc  
>CD\_NM\_001780.3:354  
CgCctGcgagtctGGtatGATCTCTTATCATGTTGGTGGAGTTCAAGAGACTCCACCAACATGATAAGAGACTTTTTGct  
cgagctggcgaattcc  
>CD\_NM\_001780.3:410  
CgCctGcgagtctGGtatGCTAAGGTGATGTCAGAGTTTAATTCAAGAGATTAACTCTGACATCACCTTATTTTTGct  
cgagctggcgaattcc  
>CD\_NM\_001780.3:228  
CgCctGcgagtctGGtatGACCTGGCTCTCTGTTGCCAGTGTTCAGAGACACTGGCAACAGAGAGCCAGGGTTTTGct  
cgagctggcgaattcc  
>CD\_NM\_001780.3:392  
CgCctGcgagtctGGtatGATGGCTATGTGTTTAGAGATAAATTCAAGAGATTATCTCTAAACACATAGCCAGTTTTGct  
cgagctggcgaattcc  
>CD\_NM\_001780.3:156  
CgCctGcgagtctGGtatGCGCAGTGGGACTGATTGCCGTGTTCAAGAGACACGGCAATCAGTCCCCTGCATTTTTGct  
cgagctggcgaattcc  
>CD\_NM\_001780.3:379  
CgCctGcgagtctGGtatGACCGCAGCCATTGCTGGCTATGTTCAAGAGACATAGCCAGCAATGGCTGCGGCTTTTTGct  
cgagctggcgaattcc  
>CD\_NM\_001780.3:342  
CgCctGcgagtctGGtatGCGCCATCTTTCTGTCTCTTATCTTCAAGAGAGATAAGAGACAGAAAGATGGCATTTTTGct  
cgagctggcgaattcc  
>CD\_NM\_001780.3:627  
CgCctGcgagtctGGtatGAAACGAGAAGGCGATCCATAAGTTCAAGAGACTTATGGATCGCCTTCTCGTTGTTTTGct  
cgagctggcgaattcc  
>CD\_NM\_001780.3:606  
CgCctGcgagtctGGtatGCGTGGGCTGTGGGATTAATTTCTTCAAGAGAGAAATTAATCCCACAGCCCACATTTTTGct  
cgagctggcgaattcc  
>CD\_NM\_001780.3:780  
CgCctGcgagtctGGtatGCAGTGGCTACGAGGTGATGTAGTTCAAGAGACTACATCACCTCGTAGCCACTTTTTTGct  
cgagctggcgaattcc  
>CD\_NM\_001780.3:599  
CgCctGcgagtctGGtatGCTGTTACTGTGGGCTGTGGGATTTCAAGAGAATCCCACAGCCCACAGTAACATTTTTGct  
cgagctggcgaattcc  
>CD\_NM\_001780.3:761  
CgCctGcgagtctGGtatGACCTCGTGAAGAGTATCAGAAGTTCAAGAGACTTCTGATACTCTTACGAGGCTTTTTGct  
cgagctggcgaattcc  
>CD\_NM\_001780.3:326  
CgCctGcgagtctGGtatGATCTTATGATCACGTTTGCCATTTCAAGAGAATGGCAAACGTGATCATAAGACTTTTTGct  
cgagctggcgaattcc  
>CD\_NM\_001780.3:344  
CgCctGcgagtctGGtatGACATCTTTCTGTCTCTTATCATTTTCAAGAGAATGATAAGAGACAGAAAGATGGTTTTGct  
cgagctggcgaattcc  
>CD\_NM\_001780.3:414

CgCtGcgagtctGGtatGAGTGATGTCAGAGTTTAATAACTTCAAGAGAGTTATTAAACTCTGACATCACCTTTTTGct  
cgagctggcgaattcc  
>CD\_NM\_001780.3:489  
CgCtGcgagtctGGtatGACTGGACAGGATGCAGGCAGATTTCAAGAGAATCTGCCTGCATCCTGTCCAGGTTTTGct  
cgagctggcgaattcc  
>CD\_NM\_001780.3:162  
CgCtGcgagtctGGtatGAGGACTGATTGCCGTGGGTGTCTTCAAGAGAGACACCCACGGCAATCAGTCCCTTTTTGct  
cgagctggcgaattcc  
>CD\_NM\_001780.3:243  
CgCtGcgagtctGGtatGACCAGTGGTCATCATCGCAGTGTTCAGAGACTGCGATGATGACCACTGGCTTTTTGct  
cgagctggcgaattcc  
>CD\_NM\_000566:533  
CgCtGcgagtctGGtatGCTCGCTACACATCAGCAGGAATTTCAAGAGAATTCCTGCTGATGTGTAGCGATTTTTGct  
cgagctggcgaattcc  
>CD\_NM\_000566:548  
CgCtGcgagtctGGtatGAAGGAATATCTGTCACTGTGAATTCAGAGATTCACAGTGACAGATATTCCTGTTTTGct  
cgagctggcgaattcc  
>CD\_NM\_000566:735  
CgCtGcgagtctGGtatGCTCCTCTGAATACCAAATACTATTCAAGAGATAGTATTTGGTATTCAGAGATTTTTGct  
cgagctggcgaattcc  
>CD\_NM\_000566.2:729  
CgCtGcgagtctGGtatGCACACATCCTCTGAATACCAAATTCAGAGATTTGGTATTCAGAGGATGTGTTTTGct  
cgagctggcgaattcc  
>CD\_NM\_000566.2:404  
CgCtGcgagtctGGtatGAGTGTACAATGTGCTTTACTATTTCAAGAGAATAGTAAAGCACATTGTACACCTTTTTGct  
cgagctggcgaattcc  
>CD\_NM\_000566.2:735  
CgCtGcgagtctGGtatGCCCTCTGAATACCAAATACTAATTCAGAGATTAGTATTTGGTATTCAGAGATTTTTGct  
cgagctggcgaattcc  
>CD\_NM\_000566.2:554  
CgCtGcgagtctGGtatGCTCTGTCACTGTGAAAGAGCTATTCAAGAGATAGCTCTTTCACAGTGACAGATTTTTGct  
cgagctggcgaattcc  
>CD\_NM\_000566.2:631  
CgCtGcgagtctGGtatGCGGTCACCCGAGCTGTGAAACTTCAAGAGAGTTTCACAGCTCAGGGTGACCATTTTTGct  
cgagctggcgaattcc  
>CD\_NM\_000566.2:44  
CgCtGcgagtctGGtatGCCAGTTGATGGGCAAGTGGACTTCAAGAGAGTCCACTTGCCCATCAACTGGATTTTTGct  
cgagctggcgaattcc  
>CD\_NM\_000566.2:668  
CgCtGcgagtctGGtatGAAGGCCTGGTTTGCAGCTTTACTTCAAGAGAGTAAAGCTGCAAACCAGGCCTTTTTGct  
cgagctggcgaattcc  
>CD\_NM\_000566.2:68  
CgCtGcgagtctGGtatGAACAAAGGCAGTGATCACTTTGTTCAAGAGACAAAGTGATCACTGCCTTTGTGTTTTGct  
cgagctggcgaattcc  
>CD\_NM\_000566.2:98  
CgCtGcgagtctGGtatGCTGGGTCAGCGTGTCCAAGAGTTCAAGAGACTCTTGGAACACGCTGACCCATTTTTGct  
cgagctggcgaattcc  
>CD\_NM\_000566.2:934  
CgCtGcgagtctGGtatGCTCTCTGGGTGACAATACGTAATTCAGAGATTACGTATTGTCACCCAGAGAATTTTTGct  
cgagctggcgaattcc  
>CD\_NM\_000566.2:236  
CgCtGcgagtctGGtatGAAGTGCAATGACAGTGGTGAATTCAGAGATTCACCACTGTCATTGACACTGTTTTGct  
cgagctggcgaattcc  
>CD\_NM\_000566.2:747

CgCctGcgagtctGGtatGAAAATACTAACTGCTAGAAAGAGTTCAAGAGACTCTTCTAGCAGTTAGTATTTGTTTTTGct  
cgagctggcgaattcc  
>CD\_NM\_000566.2:102  
CgCctGcgagtctGGtatGATCAGCGTGTCCAAGAGGAAATTC AAGAGATTTCTCTTGGAACACGCTGACTTTTTTGct  
cgagctggcgaattcc  
>CD\_NM\_000566.2:392  
CgCctGcgagtctGGtatGAAAGGATAAGCTGGTGTACAATTTCAAGAGAATTGTACACCAGCTTATCCTTCTTTTTTGct  
cgagctggcgaattcc  
>CD\_NM\_000566.2:548  
CgCctGcgagtctGGtatGCGGAATATCTGTCACTGTGAAATTC AAGAGATTTACAGTGACAGATATTCCTTTTTTGct  
cgagctggcgaattcc  
>CD\_NM\_000566.2:166  
CgCctGcgagtctGGtatGACTCTACACAGTGGTTTCTCAATTC AAGAGATTGAGAAACCACTGTGTAGAGCTTTTTTGct  
cgagctggcgaattcc  
>CD\_NM\_000566.2:380  
CgCctGcgagtctGGtatGATGTCATGCGTGGAAGGATAAGTTCAAGAGACTTATCCTTCCACGCATGACACTTTTTTGct  
cgagctggcgaattcc  
>CD\_NM\_000566.2:217  
CgCctGcgagtctGGtatGACTACAGAATCACCTCTGCCAGTTCAAGAGACTGGCAGAGGTGATTCTGTAGCTTTTTTGct  
cgagctggcgaattcc  
>CD\_NM\_000566.2:39  
CgCctGcgagtctGGtatGCGGGTTCCAGTTGATGGGCAAGTTCAAGAGACTTGCCCATCAACTGGAACCCATTTTTTGct  
cgagctggcgaattcc  
>CD\_NM\_000566.2:769  
CgCctGcgagtctGGtatGCAGACTCTGGGTATACTGGTGTTC AAGAGACACCAGTATAACCCAGAGTCTTTTTTTGct  
cgagctggcgaattcc  
>CD\_NM\_000566.2:682  
CgCctGcgagtctGGtatGCGCTTTACTTCTCCTTCTACATTTCAAGAGAATGTAGAAGGAGAAGTAAAGCTTTTTTTGct  
cgagctggcgaattcc  
>CD\_NM\_000566.2:990  
CgCctGcgagtctGGtatGCTCTCTTTGGATTCTGGTCATGTTCAAGAGACATGACCAGAATCCAAAGAGATTTTTTTGct  
cgagctggcgaattcc  
>CD\_NM\_000566.2:794  
CgCctGcgagtctGGtatGAGCTGCCACAGAGGATGGAAATTTCAAGAGAATTTCCATCCTCTGTGGCAGCCTTTTTTTGct  
cgagctggcgaattcc  
>CD\_NM\_000566.2:898  
CgCctGcgagtctGGtatGCTCTGGCAGTGGGAATAATGTTTTTCAAGAGAAACATTATTCCCCTGCCAGATTTTTTTGct  
cgagctggcgaattcc  
>CD\_NM\_000566.2:122  
CgCctGcgagtctGGtatGCACCGTAACCTTGCATTGTGAGTTCAAGAGACTCACAATGCAAGGTTACGGTTTTTTTTGct  
cgagctggcgaattcc  
>CD\_NM\_000566.2:828  
CgCctGcgagtctGGtatGCGCCCTGAGTTGGAGCTTCAAGTTCAAGAGACTTGAAGCTCCAACCTCAGGGCTTTTTTTGct  
cgagctggcgaattcc  
>CD\_NM\_000566.2:491  
CgCctGcgagtctGGtatGCAGTCACAAATGGCACCTACCATTTCAAGAGAATGGTAGGTGCCATTGTGACTTTTTTTGct  
cgagctggcgaattcc  
>CD\_NM\_000566.2:995  
CgCctGcgagtctGGtatGCTTGGATTCTGGTCATGAGAAGTTCAAGAGACTTCTCATGACCAGAATCCAAATTTTTTTGct  
cgagctggcgaattcc  
>CD\_NM\_000566.2:272  
CgCctGcgagtctGGtatGCGGTCTCTCAGGGCGAAGTGACTTCAAGAGAGTCACTTCGCCCTGAGAGACCTTTTTTTGct  
cgagctggcgaattcc  
>CD\_NM\_000566.2:1059

CgCctGcgagtctGGtatGAAGCTGAAATGTCAGGAACAAATTCAAGAGATTTGTTCCCTGACATTTACAGCTCTTTTTTGct  
cgagctggcgaattcc  
>CD\_NM\_001815:511  
CgCctGcgagtctGGtatGCAGCAACTGGACAGTTCCATGTTTTCAAGAGAACATGGAACGTCCAGTTGCTTTTTTTTGct  
cgagctggcgaattcc  
>CD\_NM\_001815:168  
CgCctGcgagtctGGtatGATGCTCACAGCCTCACTTCTAATTCAAGAGATTAGAAGTGAGGCTGTGAGCAGTTTTTTGct  
cgagctggcgaattcc  
>CD\_NM\_001712:1395  
CgCctGcgagtctGGtatGAGGGCCATTGCTGGCATTGTGATTCAAGAGATCACAATGCCAGCAATGGCCCCTTTTTTGct  
cgagctggcgaattcc  
>CD\_NM\_001712.3:490  
CgCctGcgagtctGGtatGATCAGATCTTGTGAATGAAGAATTCAAGAGATTCCTCATTACACAAGATCTGACTTTTTTGct  
cgagctggcgaattcc  
>CD\_NM\_001712.3:1521  
CgCctGcgagtctGGtatGCACCCTCAGTCTCCAACCACACTTCAAGAGAGTGTGGTTGGAGACTGAGGGTTTTTTTTGct  
cgagctggcgaattcc  
>CD\_NM\_001712.3:168  
CgCctGcgagtctGGtatGCGCTCACAGCCTCACTTCTAACTTCAAGAGAGTTAGAAGTGAGGCTGTGAGCATTTTTTGct  
cgagctggcgaattcc  
>CD\_NM\_001712.3:715  
CgCctGcgagtctGGtatGCCTACTCAGTGTCAAGGAATTTCAAGAGAAATTCCTTGTGACACTGAGTAGATTTTTTGct  
cgagctggcgaattcc  
>CD\_NM\_001712.3:549  
CgCctGcgagtctGGtatGCGCCCTCCATCTCCAGCAACAATTCAAGAGATTGTTGCTGGAGATGGAGGGCTTTTTTTGct  
cgagctggcgaattcc  
>CD\_NM\_001712.3:960  
CgCctGcgagtctGGtatGCGCTCTTTATCCCTAACATCACTTCAAGAGAGTGATGTTAGGGATAAAGAGCTTTTTTTGct  
cgagctggcgaattcc  
>CD\_NM\_001712.3:342  
CgCctGcgagtctGGtatGATCAAATTGTAGGATATGCAATTTCAAGAGAAATGCATATCCTACAATTTGACTTTTTTGct  
cgagctggcgaattcc  
>CD\_NM\_001712.3:1023  
CgCctGcgagtctGGtatGAAGTCACTGGCTGCAACAGGACTTCAAGAGAGTCTGTTGCAGCCAGTACTGTTTTTTGct  
cgagctggcgaattcc  
>CD\_NM\_001712.3:1402  
CgCctGcgagtctGGtatGCGCTGGCATTGTGATTGGAGTATTCAAGAGATACTCCAATCACAATGCCAGCATTTTTTGct  
cgagctggcgaattcc  
>CD\_NM\_001712.3:338  
CgCctGcgagtctGGtatGCACCGTCAAATTGTAGGATATGTTCAAGAGACATATCCTACAATTTGACGGTTTTTTTTGct  
cgagctggcgaattcc  
>CD\_NM\_001712.3:1302  
CgCctGcgagtctGGtatGCGGTCTTCAACCCAATCAGTAATTCAAGAGATTACTGATTGGGTGAAGACCTTTTTTTGct  
cgagctggcgaattcc  
>CD\_NM\_001712.3:488  
CgCctGcgagtctGGtatGCAGTCAGATCTTGTGAATGAAGTTCAAGAGACTTCATTACACAAGATCTGACTTTTTTTGct  
cgagctggcgaattcc  
>CD\_NM\_001712.3:436  
CgCctGcgagtctGGtatGAATCCAGAACGTCACCCAGAATTTCAAGAGAAATCTGGGTGACGTTCTGGATCTTTTTTGct  
cgagctggcgaattcc  
>CD\_NM\_001712.3:571  
CgCctGcgagtctGGtatGATCCAACCTGTGGAGGACAAGTTCAAGAGACTTGTCTCCACAGGGTTGGAGTTTTTTGct  
cgagctggcgaattcc  
>CD\_NM\_001712.3:1424



CgCctGcgagtctGGtatGATGGCCCTGGTTGCTCTGATAGTTCAAGAGACTATCAGAGCAACCAGGGCCACTTTTTTGct  
cgagctggcgaattcc  
>CD\_NM\_001712.3:1429  
CgCctGcgagtctGGtatGACTGGTTGCTCTGATAGCAGTATTCAAGAGATACTGCTATCAGAGCAACCAGTTTTTGct  
cgagctggcgaattcc  
>CD\_NM\_001712.3:1561  
CgCctGcgagtctGGtatGACCACCTAACAAAGATGAATGAATTCAAGAGATTCATTCATCTTGTTAGGTGGTTTTTGct  
cgagctggcgaattcc  
>CD\_NM\_001712.3:208  
CgCctGcgagtctGGtatGAACTGCCAGCTCACTACTGAATTCAAGAGATTCAGTAGTGAGCTGGGCAGTGTTTTTTGct  
cgagctggcgaattcc  
>CD\_NM\_001712.3:448  
CgCctGcgagtctGGtatGAACCCAGAAATGACACAGGATTCTTCAAGAGAGAATCCTGTGTCATTCTGGGTGTTTTTGct  
cgagctggcgaattcc  
>CD\_NM\_001712.3:325  
CgCctGcgagtctGGtatGCAGAGTGGATGGCAACCGTCAATTCAAGAGATTGACGGTTGCCATCCACTCTTTTTTTGct  
cgagctggcgaattcc  
>CD\_NM\_001712.3:787  
CgCctGcgagtctGGtatGAAGTGACCCAGTCACCTTGAATTTCAAGAGAATTCAAGGTGACTGGGTCAGTGTTTTTTGct  
cgagctggcgaattcc  
>CD\_NM\_001712.3:172  
CgCctGcgagtctGGtatGAACAGCCTCACTTCTAACCTTCTTCAAGAGAGAAGGTTAGAAGTGAGGCTGTTTTTTGct  
cgagctggcgaattcc  
>CD\_NM\_001712.3:967  
CgCctGcgagtctGGtatGCATCCCTAACATCACTGTGAATTTCAAGAGAATTCACAGTGATGTTAGGGATATTTTTTGct  
cgagctggcgaattcc  
>CD\_NM\_001712.3:977  
CgCctGcgagtctGGtatGCTCACTGTGAATAATAGTGGATTTCAAGAGAATCCACTATTATTACAGTGATTTTTTGct  
cgagctggcgaattcc  
>CD\_NM\_001712.3:1564  
CgCctGcgagtctGGtatGCCCTAACAAAGATGAATGAAGTTTTCAAGAGAAACTTCATTCATCTTGTTAGGTTTTTTGct  
cgagctggcgaattcc  
>CD\_NM\_001712.3:1126  
CgCctGcgagtctGGtatGCGGAGATAAGGACTCTGTGAACTTCAAGAGAGTTCACAGAGTCCTTATCTCCTTTTTTGct  
cgagctggcgaattcc  
>CD\_NM\_001712.3:424  
CgCctGcgagtctGGtatGCGCATCCCTGCTGATCCAGAACTTCAAGAGAGTTCAGGATCAGCAGGGATGCATTTTTTGct  
cgagctggcgaattcc  
>CD\_NM\_001712.3:1647  
CgCctGcgagtctGGtatGACCTAACAGCCACAGAAATAATTTCAAGAGAATTATTTCTGTGGCTGTTAGGGTTTTTGct  
cgagctggcgaattcc  
>CD\_NM\_001712.3:1342  
CgCctGcgagtctGGtatGAATGCTGAACGTAACTATAATTTCAAGAGAATTATAGTTTACGTTTACGCATGTTTTTGct  
cgagctggcgaattcc  
>CD\_NM\_001712.3:1176  
CgCctGcgagtctGGtatGCCTCCATCCGTTGGTTCTTCAATTCAAGAGATTGAAGAACCAACGGATGGAGATTTTTTGct  
cgagctggcgaattcc  
>CD\_NG\_001098:423  
CgCctGcgagtctGGtatGAATCCTACACCCTACAAGTCATTTCAAGAGAATGACTTGTAGGGTGTAGGATCTTTTTTGct  
cgagctggcgaattcc  
>CD\_NM\_001816:160  
CgCctGcgagtctGGtatGACCCACCACTGCTCAGCTCACTTTCAAGAGAAGTGAGCTGAGCAGTGGTGGGCTTTTTTGct  
cgagctggcgaattcc  
>CD\_NM\_001816:287

CgCctGcgagtctGGtatGATGGATGCCAACCGTCGAATTATTCAAGAGATAATTCGACGGTTGGCATCCACTTTTTTGct  
cgagctggcgaattcc  
>CD\_NM\_001816:431  
CgCctGcgagtctGGtatGCCCCACAAAGTCATAAAGCTAATTCGAAGAGATTAGCTTTATGACTTGTAGGGTTTTTTTGct  
cgagctggcgaattcc  
>CD\_NM\_001816:955  
CgCctGcgagtctGGtatGCTCCTATGCCTGCCACACCACCTTTCAAGAGAAGTGGTGTGGCAGGCATAGGATTTTTTTGct  
cgagctggcgaattcc  
>CD\_NM\_001816:1068  
CgCctGcgagtctGGtatGAAGCCACTGTCAGCATCATGATTTCAAGAGAATCATGATGCTGACAGTGGCTCTTTTTTGct  
cgagctggcgaattcc  
>CD\_NM\_001816.2:1015  
CgCctGcgagtctGGtatGCTCACAGTCTCTGATGCTTTAGTTCAAGAGACTAAAGCATCAGAGACTGTGATTTTTTTGct  
cgagctggcgaattcc  
>CD\_NM\_001816.2:1101  
CgCctGcgagtctGGtatGAAGGGTGGCTCTGATATAGTAGTTCAAGAGACTACTATATCAGAGCCACCCTGTTTTTTGct  
cgagctggcgaattcc  
>CD\_NM\_001816.2:299  
CgCctGcgagtctGGtatGATCGAATTATAGGATATGTAATTTCAAGAGAATTACATATCCTATAATTCGACTTTTTTTGct  
cgagctggcgaattcc  
>CD\_NM\_001816.2:672  
CgCctGcgagtctGGtatGCCTACTCAGTGTCAAGGAATTTCAAGAGAATTCCTTGTGACACTGAGTAGATTTTTTTGct  
cgagctggcgaattcc  
>CD\_NM\_001816.2:506  
CgCctGcgagtctGGtatGCGCCCTCCATCTCCAGCAACAATTCGAAGAGATTGTTGCTGGAGATGGAGGGCTTTTTTTGct  
cgagctggcgaattcc  
>CD\_NM\_001816.2:437  
CgCctGcgagtctGGtatGCAGTCATAAAGCTAAATCTTATTTCAAGAGAATAAGATTTAGCTTTATGACTTTTTTTGct  
cgagctggcgaattcc  
>CD\_NM\_001816.2:165  
CgCctGcgagtctGGtatGAACTGCTCAGCTCACTATTGAATTCGAAGAGATTCATAGTGAGCTGAGCAGTGTTTTTTTGct  
cgagctggcgaattcc  
>CD\_NM\_001816.2:865  
CgCctGcgagtctGGtatGACCTCACAGTATTCTTGGTCTGTTCAAGAGACAGACCAAGAATACTGTGAGGGTTTTTTGct  
cgagctggcgaattcc  
>CD\_NM\_001816.2:1002  
CgCctGcgagtctGGtatGAACAGTCAGGATGATCACAGTCTTCAAGAGAGACTGTGATCATCCTGACTGTGTTTTTTGct  
cgagctggcgaattcc  
>CD\_NM\_001816.2:1067  
CgCctGcgagtctGGtatGAAGCCACTGTCAGCATCATGATTTCAAGAGAATCATGATGCTGACAGTGGCTCTTTTTTTGct  
cgagctggcgaattcc  
>CD\_NM\_001816.2:882  
CgCctGcgagtctGGtatGATCTGTCAATGGCACATTCCAGTTCAAGAGACTGGAATGTGCCATTGACAGACTTTTTTTGct  
cgagctggcgaattcc  
>CD\_NM\_001816.2:1021  
CgCctGcgagtctGGtatGATCTCTGATGCTTTAGTACAAGTTCAAGAGACTTGTACTAAAGCATCAGAGACTTTTTTTGct  
cgagctggcgaattcc  
>CD\_NM\_001816.2:744  
CgCctGcgagtctGGtatGAAGTGACCCAGTCACCCTGAATTTCAAGAGAATTCAGGGTACTGGGTCAGTGTTTTTTTGct  
cgagctggcgaattcc  
>CD\_NM\_001816.2:892  
CgCctGcgagtctGGtatGAGCACATTCCAGCAATACACACTTCAAGAGAGTGTGTATTGCTGGAATGTGCCTTTTTTTGct  
cgagctggcgaattcc  
>CD\_NM\_001816.2:1065

CgCctGcgagtctGGtatGCAGAGCCACTGTCAGCATCATGTTCAAGAGACATGATGCTGACAGTGGCTCTATTTTTGct  
cgagctggcgaattcc  
>CD\_NM\_001816.2:393  
CgCctGcgagtctGGtatGAATGCGGAACGTCACCAGAAATTTCAAGAGAATTTCTGGTGACGTTCCGCATCTTTTTGct  
cgagctggcgaattcc  
>CD\_NM\_001816.2:386  
CgCctGcgagtctGGtatGACCTGCTGATGCGGAACGTCACCTTCAAGAGAGTGACGTTCCGCATCAGCAGGGTTTTGct  
cgagctggcgaattcc  
>CD\_NM\_001816.2:750  
CgCctGcgagtctGGtatGACCAGTCACCCCTGAATGTCTCTTCAAGAGAGAGGACATTCAGGGTGACTGGGTTTTGct  
cgagctggcgaattcc  
>CD\_NM\_001816.2:381  
CgCctGcgagtctGGtatGCGCATCCCTGCTGATGCGGAACTTCAAGAGAGTTCCGCATCAGCAGGGATGCATTTTTGct  
cgagctggcgaattcc  
>CD\_NM\_001816.2:429  
CgCctGcgagtctGGtatGAACCCCTACAAGTCATAAAGCTATTCAAGAGATAGCTTTATGACTTGTAGGGTGTTTTTGct  
cgagctggcgaattcc  
>CD\_NM\_001816.2:663  
CgCctGcgagtctGGtatGAACCCCTACTCTACTCAGTGTCTTCAAGAGAGACACTGAGTAGAGTGAGGGTCTTTTTGct  
cgagctggcgaattcc  
>CD\_NM\_001816.2:697  
CgCctGcgagtctGGtatGATAGGACCCCTATGAATGTGAAATTTCAAGAGATTTACATTCATAGGGTCTACTTTTTGct  
cgagctggcgaattcc  
>CD\_NM\_001816.2:601  
CgCctGcgagtctGGtatGCGGTGGGTAAAATGGTCAGAGTCTTCAAGAGAGACTCTGACCATTTACCCACCATTTTTGct  
cgagctggcgaattcc  
>CD\_NM\_001816.2:638  
CgCctGcgagtctGGtatGAGCTGCAGCTGTCCAATGGCAATTTCAAGAGATTGCCATTGGACAGCTGCAGCCTTTTTGct  
cgagctggcgaattcc  
>CD\_NM\_001816.2:180  
CgCctGcgagtctGGtatGCATTGAAGCTGTGCCATCCAATTTCAAGAGAATTGGATGGCACAGCTTCAATATTTTTGct  
cgagctggcgaattcc  
>CD\_NM\_001816.2:692  
CgCctGcgagtctGGtatGCTGACGTAGGACCCCTATGAATGTTCAAGAGACATTCATAGGGTCTACGTCATTTTTGct  
cgagctggcgaattcc  
>CD\_NM\_001816.2:219  
CgCctGcgagtctGGtatGAGTTCTTCTACTTGTCCACAATTTCAAGAGAATTGTGGACAAGTAGAAGAACCTTTTGct  
cgagctggcgaattcc  
>CD\_NM\_001815:285  
CgCctGcgagtctGGtatGCAGGATATGTAATAGGAACTCATTCAAGAGATGAGTTCCTATTACATATCCTATTTTTGct  
cgagctggcgaattcc  
>CD\_NM\_001815:101  
CgCctGcgagtctGGtatGATGCTCACAGCCCTACTTCTAATTTCAAGAGATTAGAAGTGAGGCTGTGAGCAGTTTTGct  
cgagctggcgaattcc  
>CD\_NM\_002483:444  
CgCctGcgagtctGGtatGCAGCAACCGGACAGTTCATGTTTCAAGAGAACATGGAACGTCCGGTGCTTTTTTTGct  
cgagctggcgaattcc  
>CD\_NM\_002483:630  
CgCctGcgagtctGGtatGCTGGCAACATGACCCCTACTCTTTCAAGAGAAGAGTGAGGGTCATGTTGCCATTTTTGct  
cgagctggcgaattcc  
>CD\_NM\_002483:641  
CgCctGcgagtctGGtatGCCCTCACTCTACTCAGCGTCATTTCAAGAGATGACGCTGAGTAGAGTGAGGGTTTTTTGct  
cgagctggcgaattcc  
>CD\_NM\_002483:1028

CgCctGcgagtctGGtatGATGGCCACCGTCGGCATCACGATTCAAGAGATCGTGATGCCGACGGTGGCCACTTTTTTGct  
cgagctggcgaattcc  
>CD\_NM\_002483:1055  
CgCctGcgagtctGGtatGATGCTGGCCAGGGTCGCTCTGATTCAAGAGATCAGAGCGACCTGGCCAGCACTTTTTTGct  
cgagctggcgaattcc  
>CD\_NM\_002483:1058  
CgCctGcgagtctGGtatGATGGCCAGGGTCGCTCTGATATTTCAAGAGAATATCAGAGCGACCTGGCCAGTTTTTGct  
cgagctggcgaattcc  
>CD\_NM\_002483.3:423  
CgCctGcgagtctGGtatGATCAGATCTTGTGAATGAAGAATTCAAGAGATTCTTCATTACACAAGATCTGACTTTTTTGct  
cgagctggcgaattcc  
>CD\_NM\_002483.3:101  
CgCctGcgagtctGGtatGCGCTCACAGCCTCACTTCTAACTTCAAGAGAGTTAGAAGTGAGGCTGTGAGCATTTTTTGct  
cgagctggcgaattcc  
>CD\_NM\_002483.3:275  
CgCctGcgagtctGGtatGATCTAATTGTAGGATATGTAATTTCAAGAGAATTACATATCCTACAATTAGACTTTTTTGct  
cgagctggcgaattcc  
>CD\_NM\_002483.3:482  
CgCctGcgagtctGGtatGCGCCCTCCATCTCCAGCAACAATTCAAGAGATTGTTGCTGGAGATGGAGGGCTTTTTTGct  
cgagctggcgaattcc  
>CD\_NM\_002483.3:1062  
CgCctGcgagtctGGtatGAAGGGTCGCTCTGATATAGCAGTTCAAGAGACTGCTATATCAGAGCGACCTGTTTTTGct  
cgagctggcgaattcc  
>CD\_NM\_002483.3:141  
CgCctGcgagtctGGtatGAACTGCCAAGCTCACTATTGAATTCAAGAGATTCAATAGTGAGCTTGGCAGTGTTTTTTGct  
cgagctggcgaattcc  
>CD\_NM\_002483.3:271  
CgCctGcgagtctGGtatGCACAGTCTAATTGTAGGATATGTTCAAGAGACATATCCTACAATTAGACTGTTTTTTTTGct  
cgagctggcgaattcc  
>CD\_NM\_002483.3:991  
CgCctGcgagtctGGtatGCTCACAGTCTCTGGAAGTGCTCTTCAAGAGAGAGCACTTCCAGAGACTGTGATTTTTTGct  
cgagctggcgaattcc  
>CD\_NM\_002483.3:937  
CgCctGcgagtctGGtatGCTGTGCCAAGCCCATAACTCAGTTCAAGAGACTGAGTTATGGGCTTGGCACATTTTTTGct  
cgagctggcgaattcc  
>CD\_NM\_002483.3:391  
CgCctGcgagtctGGtatGAACACAGGATTCTATACCCTACTTCAAGAGAGTAGGGTATAGAATCCTGTGTCTTTTTTGct  
cgagctggcgaattcc  
>CD\_NM\_002483.3:421  
CgCctGcgagtctGGtatGCAGTCAGATCTTGTGAATGAAGTTCAAGAGACTTCATTACACAAGATCTGACTTTTTTTGct  
cgagctggcgaattcc  
>CD\_NM\_002483.3:369  
CgCctGcgagtctGGtatGAATCCAGAACGTCACCCAGAATTTCAAGAGAATTCTGGGTGACGTTCTGGATCTTTTTTGct  
cgagctggcgaattcc  
>CD\_NM\_002483.3:978  
CgCctGcgagtctGGtatGAACAGTCACGATGATCACAGTCTTCAAGAGAGACTGTGATCATCGTGACTGTGTTTTTGct  
cgagctggcgaattcc  
>CD\_NM\_002483.3:381  
CgCctGcgagtctGGtatGAACCCAGAATGACACAGGATTCTTCAAGAGAGAATCCTGTGTCATTCTGGGTGTTTTTGct  
cgagctggcgaattcc  
>CD\_NM\_002483.3:105  
CgCctGcgagtctGGtatGAACAGCCTCACTTCTAACCTTCTTCAAGAGAGAAGGTTAGAAGTGAGGCTGTGTTTTTGct  
cgagctggcgaattcc  
>CD\_NM\_002483.3:252

CgCctGcgagtctGGtatGCGGCGAAAGAGTGGATGGCAACTTCAAGAGAGTTGCCATCCACTCTTTCGCCTTTTTTtGct  
cgagctggcgaattcc  
>CD\_NM\_002483.3:720  
CgCctGcgagtctGGtatGAAGTGACCCAGTCACCCTGAATTTCAAGAGAATTCAGGGTGACTGGGTCACTGTTTTTtGct  
cgagctggcgaattcc  
>CD\_NM\_002483.3:726  
CgCctGcgagtctGGtatGACCAGTCACCCTGAATGTCTCTTCAAGAGAGAGGACATTCAGGGTGACTGGGTTTTTTtGct  
cgagctggcgaattcc  
>CD\_NM\_002483.3:357  
CgCctGcgagtctGGtatGCGCATCCCTGCTGATCCAGAACTTCAAGAGAGTTCTGGATCAGCAGGGATGCATTTTTTtGct  
cgagctggcgaattcc  
>CD\_NM\_002483.3:910  
CgCctGcgagtctGGtatGCTCACTGTGAATAATAGCGGATTTCAAGAGAATCCGCTATTATTCACAGTGATTTTTTtGct  
cgagctggcgaattcc  
>CD\_NM\_002483.3:379  
CgCctGcgagtctGGtatGATCACCCAGAATGACACAGGATTTCAAGAGAATCCTGTGTCAATTCTGGGTGACTTTTTTtGct  
cgagctggcgaattcc  
>CD\_NM\_002483.3:620  
CgCctGcgagtctGGtatGCGCTGTCCAATGGCAACATGACTTCAAGAGAGTCATGTTGCCATTGGACAGCTTTTTTtGct  
cgagctggcgaattcc  
>CD\_NM\_002483.3:447  
CgCctGcgagtctGGtatGCACCGGACAGTTCATGTATACTTCAAGAGAGTATACATGGAAGTGTCCGGTTTTTTtGct  
cgagctggcgaattcc  
>CD\_NM\_002483.3:258  
CgCctGcgagtctGGtatGCAGAGTGGATGGCAACAGTCTATTCAAGAGATAGACTGTTGCCATCCACTCTTTTTTtGct  
cgagctggcgaattcc  
>CD\_NM\_002483.3:614  
CgCctGcgagtctGGtatGAGCTGCAGCTGTCCAATGGCAATTCAAGAGATTGCCATTGGACAGCTGCAGCCTTTTTTtGct  
cgagctggcgaattcc  
>CD\_NM\_001815:293  
CgCctGcgagtctGGtatGCGGGATATGTAATAGGAACTCATTCAAGAGATGAGTTCCTATTACATATCCATTTTTTtGct  
cgagctggcgaattcc  
>CD\_NM\_001815:452  
CgCctGcgagtctGGtatGCAGCAACTGGACAGTTCATGTTTTCAAGAGAACATGGAAGTGTCCAGTTGCTTTTTTTtGct  
cgagctggcgaattcc  
>CD\_NM\_001815:109  
CgCctGcgagtctGGtatGATGCTCACAGCCTCACTTCTAATTTCAAGAGATTAGAAGTGAGGCTGTGAGCAGTTTTTtGct  
cgagctggcgaattcc  
>CD\_NM\_001815:458  
CgCctGcgagtctGGtatGATGGACAGTTCATGTATAACCATTCAAGAGATGGTATAACATGGAAGTGTCCAGTTTTTtGct  
cgagctggcgaattcc  
>CD\_NM\_001815:202  
CgCctGcgagtctGGtatGAAGGTGCTTCTACTTGTCCACATTCAAGAGATGTGGACAAGTAGAAGCACCTTTTTTtGct  
cgagctggcgaattcc  
>CD\_NM\_001815.1:283  
CgCctGcgagtctGGtatGATCTAATTGTGGGATATGTAATTTCAAGAGAATTACATATCCCACAATTAGACTTTTTTtGct  
cgagctggcgaattcc  
>CD\_NM\_001815.1:431  
CgCctGcgagtctGGtatGATCAGATCTTGTGAATGAAGAATTCAAGAGATTCCTCATTACAAGATCTGACTTTTTTtGct  
cgagctggcgaattcc  
>CD\_NM\_001815.1:109  
CgCctGcgagtctGGtatGCGCTCACAGCCTCACTTCTAATTTCAAGAGATTTAGAAGTGAGGCTGTGAGCATTTTTTtGct  
cgagctggcgaattcc  
>CD\_NM\_001815.1:389

CgCtGcgagtctGGtatGAACCCAGAATGACATAGGATTCTTCAAGAGAGAATCCTATGTCATTCTGGGTGTTTTTGct  
cgagctggcgaattcc  
>CD\_NM\_001815.1:377  
CgCtGcgagtctGGtatGAATCCAGAATGTCACCCAGAATTTCAAGAGAATCTGGGTGACATTCTGGATCTTTTTTGct  
cgagctggcgaattcc  
>CD\_NM\_001815.1:149  
CgCtGcgagtctGGtatGAACTGCCAAGCTCACTATTGAATTTCAAGAGATTC AATAGTGAGCTTGGCAGTGTTTTTTGct  
cgagctggcgaattcc  
>CD\_NM\_001815.1:429  
CgCtGcgagtctGGtatGCAGTCAGATCTTGTGAATGAAGTTCAAGAGACTTCATTCACAAGATCTGACTTTTTTTGct  
cgagctggcgaattcc  
>CD\_NM\_001815.1:113  
CgCtGcgagtctGGtatGAACAGCCTCACTTCTAAACTTCTTCAAGAGAGAAGTTTAGAAGTGAGGCTGTGTTTTTTGct  
cgagctggcgaattcc  
>CD\_NM\_001815.1:279  
CgCtGcgagtctGGtatGCACAGTCTAATTGTGGGATATGTTCAAGAGACATATCCCACAATTAGACTGTTTTTTTGct  
cgagctggcgaattcc  
>CD\_NM\_001815.1:566  
CgCtGcgagtctGGtatGATGTTTCTGCTCCTTGCCAAATTTCAAGAGATTTGGCAAGGAGCAGGAAACACTTTTTTGct  
cgagctggcgaattcc  
>CD\_NM\_001815.1:365  
CgCtGcgagtctGGtatGCGCATCCCTGCTGATCCAGAATTTCAAGAGAATCTGGATCAGCAGGGATGCATTTTTTGct  
cgagctggcgaattcc  
>CD\_NM\_001815.1:670  
CgCtGcgagtctGGtatGCGGACAGCAGCTTCCATCTATGTTCAAGAGACATAGATGGAAGCTGCTGTCCTTTTTTTGct  
cgagctggcgaattcc  
>CD\_NM\_001815.1:387  
CgCtGcgagtctGGtatGATCACCAGAATGACATAGGATTTCAAGAGAATCCTATGTCATTCTGGGTGACTTTTTTGct  
cgagctggcgaattcc  
>CD\_NM\_001815.1:455  
CgCtGcgagtctGGtatGCACTGGACAGTTCATGTATACTTCAAGAGAGTATACATGGAAGTGTCCAGTTTTTTTGct  
cgagctggcgaattcc  
>CD\_NM\_001815.1:266  
CgCtGcgagtctGGtatGCAGAGTGGATGGCAACAGTCTATTTCAAGAGATAGACTGTTGCCATCCACTTTTTTTGct  
cgagctggcgaattcc  
>CD\_NM\_001815.1:142  
CgCtGcgagtctGGtatGAGCCCACCACTGCCAAGCTCACTTCAAGAGAGTGAGCTTGGCAGTGGTGGGCGTTTTTTGct  
cgagctggcgaattcc  
>CD\_NM\_001815.1:338  
CgCtGcgagtctGGtatGAAGCGGTCGAGAGACAATATACTTCAAGAGAGTATATTGTCTCTCGACCGCTGTTTTTTGct  
cgagctggcgaattcc  
>CD\_NM\_001815.1:344  
CgCtGcgagtctGGtatGCCGAGAGACAATATACACCAATTTCAAGAGAATTTGGTGTATATTGTCTCTCGATTTTTTGct  
cgagctggcgaattcc  
>CD\_NM\_001815.1:421  
CgCtGcgagtctGGtatGCAGTCATAAAGTCAGATCTTGTTC AAGAGAACAAGATCTGACTTTATGACTTTTTTTGct  
cgagctggcgaattcc  
>CD\_NM\_001815.1:119  
CgCtGcgagtctGGtatGATCACTTCTAAACTTCTGGAAC TTTCAAGAGAGTTCAGAAGTTTAGAAGTGAGTTTTTTGct  
cgagctggcgaattcc  
>CD\_NM\_001815.1:203  
CgCtGcgagtctGGtatGAGTGCTTCTACTTGTCCACAATTTCAAGAGAATTTGTGGACAAGTAGAAGCACTTTTTTGct  
cgagctggcgaattcc  
>CD\_NM\_001815.1:281

CgCctGcgagtctGGtatGAAGTCTAATTGTGGGATATGTATTCAAGAGATACATATCCCACAATTAGACTGTTTTTGct  
cgagctggcgaattcc  
>CD\_NM\_001815.1:435  
CgCctGcgagtctGGtatGAATCTTGTGAATGAAGAAGCAATTC AAGAGATTGCTTCTTCATTCACAAGATCTTTTTGct  
cgagctggcgaattcc  
>CD\_NM\_001815.1:368  
CgCctGcgagtctGGtatGCTCCCTGCTGATCCAGAATGTCTTCAAGAGAGACATTCTGGATCAGCAGGGATTTTTTGct  
cgagctggcgaattcc  
>CD\_NM\_001815.1:336  
CgCctGcgagtctGGtatGCACAGCGGTCGAGAGACAATATTTCAAGAGAATATTGTCTCTCGACCGCTGTATTTTTGct  
cgagctggcgaattcc  
>CD\_NM\_001815.1:560  
CgCctGcgagtctGGtatGACTGGTGTGTTTCTGCTCCTTTTTCAAGAGAAAGGAGCAGGAAACACACCAGCTTTTTGct  
cgagctggcgaattcc  
>CD\_NM\_001815.1:425  
CgCctGcgagtctGGtatGAATAAAGTCAGATCTTGTGAATTTCAAGAGAATTCACAAGATCTGACTTTATGTTTTGct  
cgagctggcgaattcc  
>CD\_NM\_001815.1:608  
CgCctGcgagtctGGtatGACCACAGCTCTGCCTTCTCGATTTCAAGAGAATCGAGAAGGCAGAGCTGTGGTTTTGct  
cgagctggcgaattcc  
>CD\_NM\_001815:353  
CgCctGcgagtctGGtatGCAGGATATGTAATAGGAACTCATTCAAGAGATGAGTTCCTATTACATATCCTATTTTTGct  
cgagctggcgaattcc  
>CD\_NM\_001815:169  
CgCctGcgagtctGGtatGATGCTCACAGCCTCACTTCTAATTC AAGAGATTAGAAGTGAGGCTGTGAGCAGTTTTGct  
cgagctggcgaattcc  
>CD\_NM\_001815:262  
CgCctGcgagtctGGtatGAAGGTGCTTCTACTTGTCCACATTC AAGAGATGTGGACAAGTAGAAGCACCTCTTTTTGct  
cgagctggcgaattcc  
>CD\_NM\_004363:788  
CgCctGcgagtctGGtatGACAGTGATTCAGTCATCCTGAATTC AAGAGATTCAGGATGACTGAATCACTGCTTTTTGct  
cgagctggcgaattcc  
>CD\_NM\_004363:1809  
CgCctGcgagtctGGtatGAGCAAGAGCCTATGTATGTGGATTC AAGAGATCCACATACATAGGCTCTTGCGTTTTGct  
cgagctggcgaattcc  
>CD\_NM\_004363:473  
CgCctGcgagtctGGtatGCCACCCTACACGTCATAAAGTCTTCAAGAGAGACTTTATGACGTGTAGGGTGTTTTTGct  
cgagctggcgaattcc  
>CD\_NM\_004363:2127  
CgCctGcgagtctGGtatGAATCACAGTCTCTGCATCTGGATTC AAGAGATCCAGATGCAGAGACTGTGATGTTTTGct  
cgagctggcgaattcc  
>CD\_NM\_004363:392  
CgCctGcgagtctGGtatGACGCATACAGTGGTCGAGAGATTTCAAGAGAATCTCTCGACCACTGTATGCGTTTTGct  
cgagctggcgaattcc  
>CD\_NM\_004363:1495  
CgCctGcgagtctGGtatGAAGCTCTTTATCTCCAACATCATTCAAGAGATGATGTTGGAGATAAAGAGCTTTTTGct  
cgagctggcgaattcc  
>CD\_NM\_004363:1981  
CgCctGcgagtctGGtatGACGCAGTATCTTGGCGTATCATTCAAGAGATGATACGCCAAGAATACTGCGTTTTGct  
cgagctggcgaattcc  
>CD\_NM\_004363:2051  
CgCctGcgagtctGGtatGAGCCAAATAATAACGGGACCTATTCAAGAGATAGGTCCCGTTATTATTTGGCGTTTTGct  
cgagctggcgaattcc  
>CD\_NM\_004363:1572

CgCctGcgagtctGGtatGAAGCAGGACTACAGTCAAGACATTCAAGAGATGTCTTGACTGTAGTCCTGCTGTTTTTGct  
cgagctggcgaattcc  
>CD\_NM\_004363.1:2101  
CgCctGcgagtctGGtatGAGCCGCAATAATTCCATAGTCATTCAAGAGATGACTATGGAATTATTGCGCCTTTTTTGct  
cgagctggcgaattcc  
>CD\_NM\_004363.1:1495  
CgCctGcgagtctGGtatGCGCTCTTTATCTCCAACATCACTTCAAGAGAGTGATGTTGGAGATAAAGAGCTTTTTTGct  
cgagctggcgaattcc  
>CD\_NM\_004363.1:788  
CgCctGcgagtctGGtatGAAGTGATTCAAGTCACTCCTGAATTTCAAGAGAATTCAGGATGACTGAATCACTGTTTTTGct  
cgagctggcgaattcc  
>CD\_NM\_004363.1:491  
CgCctGcgagtctGGtatGATCAGATCTTGTGAATGAAGAATTCAAGAGATTCCTCATTCAAGATCTGACTTTTTTGct  
cgagctggcgaattcc  
>CD\_NM\_004363.1:2127  
CgCctGcgagtctGGtatGCTCACAGTCTCTGCATCTGGAATTTCAAGAGATTCAGATGCAGAGACTGTGATTTTTTGct  
cgagctggcgaattcc  
>CD\_NM\_004363.1:716  
CgCctGcgagtctGGtatGCCTATTCAATGTCACAAGAAATTTCAAGAGAATTTCTTGTGACATTGAATAGATTTTTTGct  
cgagctggcgaattcc  
>CD\_NM\_004363.1:1784  
CgCctGcgagtctGGtatGCCTATTCAATGTCACAAGAAATTTCAAGAGAATTTCTTGTGACATTGAATAGATTTTTTGct  
cgagctggcgaattcc  
>CD\_NM\_004363.1:169  
CgCctGcgagtctGGtatGCGCTCACAGCCTCACTTCTAAGAGAGTTAGAAGTGAGGCTGTGAGCATTTTTTTGct  
cgagctggcgaattcc  
>CD\_NM\_004363.1:1250  
CgCctGcgagtctGGtatGCCTACTCAGTGTCAACAAGGAATTTCAAGAGAATTCCTTGTGACACTGAGTAGATTTTTTGct  
cgagctggcgaattcc  
>CD\_NM\_004363.1:550  
CgCctGcgagtctGGtatGCGCCCTCCATCTCCAGCAACAATTTCAAGAGATGTTGCTGGAGATGGAGGGCTTTTTTGct  
cgagctggcgaattcc  
>CD\_NM\_004363.1:1618  
CgCctGcgagtctGGtatGCGCCCTCCATCTCCAGCAACAATTTCAAGAGATGTTGCTGGAGATGGAGGGCTTTTTTGct  
cgagctggcgaattcc  
>CD\_NM\_004363.1:1322  
CgCctGcgagtctGGtatGAAGCGACCCAGTCATCCTGAATTTCAAGAGAATTCAGGATGACTGGGTCGCTGTTTTTGct  
cgagctggcgaattcc  
>CD\_NM\_004363.1:437  
CgCctGcgagtctGGtatGAATCCAGAACATCATCCAGAATTTCAAGAGAATTCCTGGATGATGTTCTGGATCTTTTTTGct  
cgagctggcgaattcc  
>CD\_NM\_004363.1:2102  
CgCctGcgagtctGGtatGACGCAATAATTCCATAGTCAAGTTCAAGAGACTTGACTATGGAATTATTGCGGTTTTTGct  
cgagctggcgaattcc  
>CD\_NM\_004363.1:709  
CgCctGcgagtctGGtatGACCTCACTCTATTCAATGTCACTTCAAGAGAGTGACATTGAATAGAGTGAGGGTTTTTGct  
cgagctggcgaattcc  
>CD\_NM\_004363.1:1777  
CgCctGcgagtctGGtatGACCTCACTCTATTCAATGTCACTTCAAGAGAGTGACATTGAATAGAGTGAGGGTTTTTGct  
cgagctggcgaattcc  
>CD\_NM\_004363.1:209  
CgCctGcgagtctGGtatGAACTGCCAAGCTCACTATTGAATTTCAAGAGATTCATAGTGAGCTTGGCAGTTTTTTGct  
cgagctggcgaattcc  
>CD\_NM\_004363.1:1059



CgCtGcgagtctGGtatGCTCACAGTCTATGCAGAGCCACTTCAAGAGAGTGGCTCTGCATAGACTGTGATTTTTTgct  
cgagctggcgaattcc  
>CD\_NM\_004363.1:2133  
CgCtGcgagtctGGtatGATCTCTGCATCTGGAACCTTCTTCAAGAGAGAGAAGTTCCAGATGCAGAGACTTTTTGct  
cgagctggcgaattcc  
>CD\_NM\_004363.1:398  
CgCtGcgagtctGGtatGAAGTGGTCGAGAGATAATATACTTCAAGAGAGTATATTATCTCTCGACCACTGTTTTTgct  
cgagctggcgaattcc  
>CD\_NM\_004363.1:1005  
CgCtGcgagtctGGtatGCCGTGCCAAGCCCATAACTCAGTTCAAGAGACTGAGTTATGGGCTTGGCACGTTTTTgct  
cgagctggcgaattcc  
>CD\_NM\_002781:859  
CgCtGcgagtctGGtatGCAGCCCTACATCACCATCAACATTCAAGAGATGTTGATGGTGTAGGGCTTTTTTgct  
cgagctggcgaattcc  
>CD\_NM\_002781:1029  
CgCtGcgagtctGGtatGCCCCAGTGTACGAGAAATGAATTCAAGAGATTCATTTCTCGTGACACTGGGTTTTTgct  
cgagctggcgaattcc  
>CD\_NM\_002781:1161  
CgCtGcgagtctGGtatGAACCTATTACCGTTCAGGAGAATTCAAGAGATTCCTCTGAACGGTAATAGGTGTTTTTgct  
cgagctggcgaattcc  
>CD\_NM\_002782:354  
CgCtGcgagtctGGtatGAAGGGACCTCTACCATTACATTTTTCAAGAGAAATGTAATGGTAGAGGTCCCTTTTTTgct  
cgagctggcgaattcc  
>CD\_NM\_002782:1161  
CgCtGcgagtctGGtatGAACCTATTACCGTTCAGGAGAATTCAAGAGATTCCTCTGAACGGTAATAGGTGTTTTTgct  
cgagctggcgaattcc  
>CD\_NM\_002780:1161  
CgCtGcgagtctGGtatGAACCTATTACCGTTCAGGAGAATTCAAGAGATTCCTCTGAACGGTAATAGGTGTTTTTgct  
cgagctggcgaattcc  
>CD\_NM\_002780:580  
CgCtGcgagtctGGtatGCAGCCCTCCATCTCCAGCAGCATTCAAGAGATGCTGCTGGAGATGGAGGGCTTTTTTgct  
cgagctggcgaattcc  
>CD\_NM\_006905.2:830  
CgCtGcgagtctGGtatGAACCTGAATCTCTCCCGAAGTTCAAGAGACTTCGGGAGGAGATTCAGGGTTTTTTgct  
cgagctggcgaattcc  
>CD\_NM\_006905.2:1270  
CgCtGcgagtctGGtatGCGCTCTTTATCCGCCATATTACTTCAAGAGAGTAATATGGCGGATAAAGAGCTTTTTTgct  
cgagctggcgaattcc  
>CD\_NM\_006905.2:1364  
CgCtGcgagtctGGtatGAACAGTCGAAGTCTCTGGTAAGTTCAAGAGACTTACCAGAGACTTCGACTGTCTTTTTTgct  
cgagctggcgaattcc  
>CD\_NM\_006905.2:164  
CgCtGcgagtctGGtatGAACACAGCGCATCAAATGGAAGTTCAAGAGACTTCCATTTGATGCGCTGTGTGTTTTTgct  
cgagctggcgaattcc  
>CD\_NM\_006905.2:1025  
CgCtGcgagtctGGtatGCCTACCCAGTGTACGAGAAATTTCAAGAGAATTTCTCGTGACACTGGGTAGATTTTTTgct  
cgagctggcgaattcc  
>CD\_NM\_006905.2:580  
CgCtGcgagtctGGtatGCGCCCTCCATCTCCAGCAGCAATTCAAGAGATGCTGCTGGAGATGGAGGGCTTTTTTgct  
cgagctggcgaattcc  
>CD\_NM\_006905.2:1218  
CgCtGcgagtctGGtatGACGGCACAGTATTCTTGGACAATTCAAGAGATTTGTCGAAGAATACTGTGCCGGTTTTTgct  
cgagctggcgaattcc  
>CD\_NM\_006905.2:1329

CgCctGcgagtctGGtatGCACTCAGCCACTGGCAAGGAAATTC AAGAGATTCCTTGCCAGTGGCTGAGTTTTTTTGct  
cgagctggcgaattcc  
>CD\_NM\_006905.2:645  
CgCctGcgagtctGGtatGAACCTGAGACTCCAGACGCAATTC AAGAGATTCGCTCTGGAGTCTCAGGGTCTTTTTTGct  
cgagctggcgaattcc  
>CD\_NM\_006905.2:639  
CgCctGcgagtctGGtatGCCCTGTGACCTGAGACTCCAGTTC AAGAGACTGGAGTCTCAGGGTCACAGGTTTTTTTGct  
cgagctggcgaattcc  
>CD\_NM\_006905.2:977  
CgCctGcgagtctGGtatGACCGGTCAGTCCCAGGGTAAAGTTCAAGAGACTTTACCTGGGACTGACCGGGTTTTTTGct  
cgagctggcgaattcc  
>CD\_NM\_006905.2:233  
CgCctGcgagtctGGtatGAACTGCCAAGTCACGATTGAATTC AAGAGATTC AATCGTGACTTGGGCAGTGTTTTTTGct  
cgagctggcgaattcc  
>CD\_NM\_006905.2:461  
CgCctGcgagtctGGtatGAATCCAGAATGTCACCCGGGAGTTCAAGAGACTCCCGGGTGACATTCCTGGATCTTTTTTGct  
cgagctggcgaattcc  
>CD\_NM\_006905.2:748  
CgCctGcgagtctGGtatGCATTGGGTGTCACAAAGTATACTTC AAGAGAGTATACTTTGTGACACCCAATTTTTTGct  
cgagctggcgaattcc  
>CD\_NM\_006905.2:746  
CgCctGcgagtctGGtatGCCTATTGGGTGTCACAAAGTATTTCAAGAGAATACTTTGTGACACCCAATAGATTTTTTGct  
cgagctggcgaattcc  
>CD\_NM\_006905.2:975  
CgCctGcgagtctGGtatGATCCCGGTCAGTCCCAGGGTAAATTC AAGAGATTACCCTGGGACTGACCGGGAGTTTTTTGct  
cgagctggcgaattcc  
>CD\_NM\_006905.2:818  
CgCctGcgagtctGGtatGAAGTGACCCAGTCACCCTGAATTTCAAGAGAATTCAGGGTGACTGGGTCACTGTTTTTTGct  
cgagctggcgaattcc  
>CD\_NM\_006905.2:1097  
CgCctGcgagtctGGtatGAAGTGACCCAGTCACCCTGAATTTCAAGAGAATTCAGGGTGACTGGGTCACTGTTTTTTGct  
cgagctggcgaattcc  
>CD\_NM\_006905.2:1282  
CgCctGcgagtctGGtatGACCATATTACTACAAAGCATAGTTCAAGAGACTATGCTTTGTAGTAATATGGCTTTTTTTGct  
cgagctggcgaattcc  
>CD\_NM\_006905.2:1161  
CgCctGcgagtctGGtatGCCCTATTACCGTTCAGGAGAAGTTCAAGAGACTTCTCCTGAACGGTAATAGGTTTTTTTGct  
cgagctggcgaattcc  
>CD\_NM\_006905.2:1018  
CgCctGcgagtctGGtatGCCCTCATTCTACCCAGTGTCACTTCAAGAGAGTGACACTGGGTAGAATGAGGATTTTTTTGct  
cgagctggcgaattcc  
>CD\_NM\_006905.2:414  
CgCctGcgagtctGGtatGACTGCATATAGTGGACGAGAAATTC AAGAGATTTCTCGTCCACTATATGCAGGTTTTTTGct  
cgagctggcgaattcc  
>CD\_NM\_006905.2:1103  
CgCctGcgagtctGGtatGACCAGTCACCCTGAATGTCCTCTTCAAGAGAGAGGACATTCAGGGTGACTGGGTTTTTTGct  
cgagctggcgaattcc  
>CD\_NM\_006905.2:618  
CgCctGcgagtctGGtatGCCCATGGAGGCTGTGAGCTTAATTC AAGAGATTAAGCTCACAGCCTCCATGGTTTTTTTGct  
cgagctggcgaattcc  
>CD\_NM\_006905.2:850  
CgCctGcgagtctGGtatGCGCTGCCAAGCCCTACATCACTTCAAGAGAGTGATGTAGGGCTTGGGCAGCTTTTTTTGct  
cgagctggcgaattcc  
>CD\_NM\_006905.2:824

CgCctGcgagtctGGtatGACCAGTCACCCTGAATCTCCTCTTCAAGAGAGAGGAGATTGAGGGTACTGGGTTTTTGct  
cgagctggcgaattcc  
>CD\_NM\_001251:74  
CgCctGcgagtctGGtatGAAGGGAATGACTGTCTCACAAATCAAGAGATTGTGAGGACAGTCATTCCCTGTTTTTGct  
cgagctggcgaattcc  
>CD\_NM\_001251:447  
CgCctGcgagtctGGtatGCCCTCTCCGAGTCCTAGCCCATCAAGAGATGGGCTAGGACTCGGAGAGGGTTTTTGct  
cgagctggcgaattcc  
>CD\_NM\_001251.1:777  
CgCctGcgagtctGGtatGCGGACATTCTCGGCTCAGAATGTTCAAGAGACATTCTGAGCCGAGAATGTCCATTTTTTGct  
cgagctggcgaattcc  
>CD\_NM\_001251.1:447  
CgCctGcgagtctGGtatGACCTCTCCGAGTCCTAGCCCAATCAAGAGATTGGGCTAGGACTCGGAGAGGGTTTTTGct  
cgagctggcgaattcc  
>CD\_NM\_001251.1:518  
CgCctGcgagtctGGtatGATGTGTCCACCTCCAAGCCCAGTTCAAGAGACTGGGCTTGAGGTGGACACAGTTTTTGct  
cgagctggcgaattcc  
>CD\_NM\_001251.1:695  
CgCctGcgagtctGGtatGAATGCAGGACCTCAGCAGAAGTTCAAGAGACTTCTGCTGGAGGTCTGCATGTTTTTGct  
cgagctggcgaattcc  
>CD\_NM\_001251.1:1016  
CgCctGcgagtctGGtatGAGCCCTGGTGCTTATTGCTTTCTTCAAGAGAGAAAGCAATAAGCACCAGGGCGTTTTTGct  
cgagctggcgaattcc  
>CD\_NM\_001251.1:316  
CgCctGcgagtctGGtatGACCAGGGACCTCAACTGCCACTTCAAGAGAGTGGCAGTTGAGGGTCCCTGGCTTTTTTGct  
cgagctggcgaattcc  
>CD\_NM\_001251.1:533  
CgCctGcgagtctGGtatGCGCCAGATTCAGATTCGAGTCTTCAAGAGAGACTCGAATCTGAATCTGGGCTTTTTTGct  
cgagctggcgaattcc  
>CD\_NM\_001251.1:1021  
CgCctGcgagtctGGtatGCGGTGCTTATTGCTTTCTGCATTTCAAGAGAATGCAGAAAGCAATAAGCACCATTTTTTGct  
cgagctggcgaattcc  
>CD\_NM\_001251.1:475  
CgCctGcgagtctGGtatGCGGAGACCATTTGAGACTACACTTCAAGAGAGTGTAGTCTCCAATGGTCTCCTTTTTTGct  
cgagctggcgaattcc  
>CD\_NM\_001251.1:1024  
CgCctGcgagtctGGtatGCGCTTATTGCTTTCTGCATCATTTCAAGAGAATGATGCAGAAAGCAATAAGCATTTTTTTGct  
cgagctggcgaattcc  
>CD\_NM\_001251.1:1010  
CgCctGcgagtctGGtatGACTCCTCGCCCTGGTGCTTATTTTTCAAGAGAAATAAGCACCAGGGCGAGGAGTTTTTGct  
cgagctggcgaattcc  
>CD\_NM\_001251.1:281  
CgCctGcgagtctGGtatGAACAGTTCATCCAACAAGCAATTTCAAGAGAATTGCTTGTGGATGAACTGTGTTTTTGct  
cgagctggcgaattcc  
>CD\_NM\_001251.1:676  
CgCctGcgagtctGGtatGAACACCTCAGCTTTGGATTCAATTTCAAGAGAATGAATCCAAAGCTGAGGTGTCTTTTTTGct  
cgagctggcgaattcc  
>CD\_NM\_001251.1:109  
CgCctGcgagtctGGtatGCGCTGCCATCCTTACGGTGACTTCAAGAGAGTACCGTGAAGGATGGCAGCATTTTTTGct  
cgagctggcgaattcc  
>CD\_NM\_001251.1:786  
CgCctGcgagtctGGtatGCCGGCTCAGAATGCATCCCTTCTTCAAGAGAGAAGGGATGCATTCTGAGCCGATTTTTTGct  
cgagctggcgaattcc  
>CD\_NM\_001251.1:348

CgCctGcgagtctGGtatGACCACCACTAGTCATGGAAATGTTCAAGAGACATTTCCATGACTAGTGGTGGCTTTTTGct  
cgagctggcgaattcc  
>CD\_NM\_001251.1:716  
CgCctGcgagtctGGtatGAGTTGTCTACCTGAGCTACATGTTCAAGAGACATGTAGCTCAGGTAGACAACCTTTTTGct  
cgagctggcgaattcc  
>CD\_NM\_001251.1:829  
CgCctGcgagtctGGtatGAGCAGAGCTTCAGTTGCAGCAATTC AAGAGATTGCTGCAACTGAAGCTCTGCCTTTTTGct  
cgagctggcgaattcc  
>CD\_NM\_001251.1:71  
CgCctGcgagtctGGtatGAACAGGGAATGACTGTCTCACTTCAAGAGAGTGAGGACAGTCATTCCCTGTCTTTTTGct  
cgagctggcgaattcc  
>CD\_NM\_001251.1:337  
CgCctGcgagtctGGtatGATCACAGTCCCTGCCACCACTAGTTCAAGAGACTAGTGGTGGCAGGACTGTGAGTTTTGct  
cgagctggcgaattcc  
>CD\_NM\_001251.1:683  
CgCctGcgagtctGGtatGAAGCTTTGGATTCATGCAGGACTTCAAGAGAGTCTGCATGAATCCAAAGCTGTTTTGct  
cgagctggcgaattcc  
>CD\_NM\_001251.1:470  
CgCctGcgagtctGGtatGATCCAAGGAGACCATTGGAGACTTCAAGAGAGTCTCCAATGGTCTCCTTGAGTTTTGct  
cgagctggcgaattcc  
>CD\_NM\_001251.1:541  
CgCctGcgagtctGGtatGCTCAGATTTCGAGTCATGTACACTTCAAGAGAGTGTACATGACTCGAATCTGAATTTTTGct  
cgagctggcgaattcc  
>CD\_NM\_001251.1:775  
CgCctGcgagtctGGtatGCGTGGACATTTCTCGGCTCAGAATTC AAGAGATTCTGAGCCGAGAATGTCCACTTTTTGct  
cgagctggcgaattcc  
>CD\_NM\_001251.1:397  
CgCctGcgagtctGGtatGATGCCACCAGCCCAGGATTCACTTCAAGAGAGTGAATCCTGGGCTGGTGGCAGTTTTGct  
cgagctggcgaattcc  
>CD\_NM\_001251.1:322  
CgCctGcgagtctGGtatGAACCCCTCAACTGCCACTCACAGTTCAAGAGACTGTGAGTGGCAGTTGAGGGTCTTTTTGct  
cgagctggcgaattcc  
>CD\_NM\_001251.1:792  
CgCctGcgagtctGGtatGAAGAATGCATCCCTTCGAGATCTTCAAGAGAGATCTCGAAGGGATGCATTCTGTTTTGct  
cgagctggcgaattcc  
>CD\_NM\_001251.1:866  
CgCctGcgagtctGGtatGCTCACCAGCTGTCCACCTCGACTTCAAGAGAGTCGAGGTGGACAGCTGGTGAATTTTTGct  
cgagctggcgaattcc  
>CD\_NM\_001251.1:460  
CgCctGcgagtctGGtatGATAGCCCAACCTCCAAGGAGACTTCAAGAGAGTCTCCTTGAGGTTGGGCTAGTTTTGct  
cgagctggcgaattcc  
>CD\_NM\_001251.1:485  
CgCctGcgagtctGGtatGCGGAGACTACACGTGGACCAATTTCAAGAGAATTGGTCCACGTGTAGTCTCCATTTTTGct  
cgagctggcgaattcc  
>CD\_NM\_001251.1:233  
CgCctGcgagtctGGtatGCCCCACGACTGCCACTCACAAC TCAAGAGAGTTGTGAGTGGCAGTCGTGGGTTTTGct  
cgagctggcgaattcc  
>CD\_NM\_001781:355  
CgCctGcgagtctGGtatGCACCAGAGGAAATGCTACTTTATTCAAGAGATAAAGTAGCATTTCCTCTGGTATTTTTGct  
cgagctggcgaattcc  
>CD\_NM\_001781:390  
CgCctGcgagtctGGtatGAAGGAGCTGGACTTCAGCCCAATTC AAGAGATTGGGCTGAAGTCCAGCTCCTTTTTGct  
cgagctggcgaattcc  
>CD\_NM\_001781.1:355

CgCctGcgagtctGGtatGCCAGAGGAAATGCTACTTTATTTCAAGAGAATAAAGTAGCATTTCCTCTGGTTTTTTGct  
cgagctggcgaattcc  
>CD\_NM\_001781.1:627  
CgCctGcgagtctGGtatGCGCATGGAATGTGAGAAGAATTTTCAAGAGAAATTCCTTCTCACATTCCATGCTTTTTTTGct  
cgagctggcgaattcc  
>CD\_NM\_001781.1:367  
CgCctGcgagtctGGtatGACTACTTTATTTCTACTGTGAATTCAGAGATTCACAGTAGAAATAAAGTAGCTTTTTTGct  
cgagctggcgaattcc  
>CD\_NM\_001781.1:438  
CgCctGcgagtctGGtatGATTGCTGTCATTGATTCTGAAATTCAGAGATTCAGAATCAATGACAGCAAGTTTTTTGct  
cgagctggcgaattcc  
>CD\_NM\_001781.1:298  
CgCctGcgagtctGGtatGAATTCTCAATGCCATCAGACAGTTCAAGAGACTGTCTGATGGCATTGAGAATGTTTTTTGct  
cgagctggcgaattcc  
>CD\_NM\_001781.1:292  
CgCctGcgagtctGGtatGCATACACATTCTCAATGCCATCTTCAAGAGAGATGGCATTGAGAATGTGTATTTTTTTGct  
cgagctggcgaattcc  
>CD\_NM\_001781.1:212  
CgCctGcgagtctGGtatGCGTAATGAATGTGGTCTTCATCTTCAAGAGAGATGAAGACCACATTCATTACATTTTTTTGct  
cgagctggcgaattcc  
>CD\_NM\_001781.1:340  
CgCctGcgagtctGGtatGCGGACTGGGTTGGCTACCAGAGTTCAAGAGACTCTGGTAGCCAACCCAGTCCTTTTTTTGct  
cgagctggcgaattcc  
>CD\_NM\_001781.1:200  
CgCctGcgagtctGGtatGCGTCTGTGTGCTGTAATGAATTTCAAGAGAATTCATTACAGCACACAGGACATTTTTTTGct  
cgagctggcgaattcc  
>CD\_NM\_001781.1:540  
CgCctGcgagtctGGtatGCAGTGGTCAAATGGCAAAGAATTTCAAGAGAATTCCTTTGCCATTTGACCACTTTTTTTGct  
cgagctggcgaattcc  
>CD\_NM\_001781.1:579  
CgCctGcgagtctGGtatGATTACAGGGTCTGACAAGTGTGTTCAAGAGACACACTTGTCTCAGACCCGTAACTTTTTTTGct  
cgagctggcgaattcc  
>CD\_NM\_001781.1:123  
CgCctGcgagtctGGtatGAATCCGGAGAGTGGACAAGAAATTCAGAGATTTCTTGTCCACTCTCCGGATGTTTTTTGct  
cgagctggcgaattcc  
>CD\_NM\_001781.1:434  
CgCctGcgagtctGGtatGCACTCTTGCTGTCATTGATTCTTTCAAGAGAAGAATCAATGACAGCAAGAGTATTTTTTTGct  
cgagctggcgaattcc  
>CD\_NM\_001781.1:335  
CgCctGcgagtctGGtatGATCTGAGGACTGGGTTGGCTACTTCAAGAGAGTAGCCAACCCAGTCCTCAGAGTTTTTTGct  
cgagctggcgaattcc  
>CD\_NM\_001781.1:248  
CgCctGcgagtctGGtatGCGCTCTCATTCGCTTATCAGTGTTCAGAGACACTGATAAGGCAATGAGAGCTTTTTTTGct  
cgagctggcgaattcc  
>CD\_NM\_001781.1:196  
CgCctGcgagtctGGtatGCTCCTGTCTGTGTGCTGTAATTTCAAGAGAATTACAGCACACAGGACAGGAATTTTTTTGct  
cgagctggcgaattcc  
>CD\_NM\_001781.1:637  
CgCctGcgagtctGGtatGATGAGAAGAATTTATACTGGATTTCAAGAGAATCCAGTATAAATTCCTTCTCACTTTTTTTGct  
cgagctggcgaattcc  
>CD\_NM\_001781.1:390  
CgCctGcgagtctGGtatGCGGAGCTGGACTTCAGCCCAAATTCAGAGATTTGGGCTGAAGTCCAGCTCCTTTTTTTGct  
cgagctggcgaattcc  
>CD\_NM\_001781.1:296

CgCctGcgagtctGGtatGAACATTCTCAATGCCATCAGACTTCAAGAGAGTCTGATGGCATTGAGAATGTGTTTTTGct  
cgagctggcgaattcc  
>CD\_NM\_001781.1:659  
CgCctGcgagtctGGtatGCTGTAACAAACCTTACAAATAATTCAAGAGATTATTTGTAAGGTTTGTACATTTTTTGct  
cgagctggcgaattcc  
>CD\_NM\_001781.1:417  
CgCctGcgagtctGGtatGCGTTCTGAACATGGTGTACTCTTCAAGAGAGAGTAGCACCATGTTTCAGAACATTTTTTGct  
cgagctggcgaattcc  
>CD\_NM\_001781.1:279  
CgCctGcgagtctGGtatGCATTGTCCAGGCCAATACACATTTCAAGAGAATGTGTATTGGCCTGGACAATTTTTTGct  
cgagctggcgaattcc  
>CD\_NM\_001781.1:428  
CgCctGcgagtctGGtatGCGGTGCTACTCTTGCTGTCATTTTCAAGAGAAATGACAGCAAGAGTAGCACCATTTTTTGct  
cgagctggcgaattcc  
>CD\_NM\_001781.1:541  
CgCctGcgagtctGGtatGCGTGGTCAAATGGCAAAGAATTTTCAAGAGAAATCTTTGCCATTTGACCATTTTTTGct  
cgagctggcgaattcc  
>CD\_NM\_001781.1:420  
CgCctGcgagtctGGtatGCCTGAACATGGTGTACTCTTGTTCAAGAGACAAGAGTAGCACCATGTTTCAGATTTTTTGct  
cgagctggcgaattcc  
>CD\_NM\_001781.1:114  
CgCctGcgagtctGGtatGCGCTCTTTGCATCCGGAGAGTGTTC AAGAGACACTCTCCGGATGCAAAGAGCTTTTTTGct  
cgagctggcgaattcc  
>CD\_NM\_001781.1:318  
CgCctGcgagtctGGtatGCGCCATGTTTCTTCATGCTCTGTTCAAGAGACAGAGCATGAAGAAACATGGCTTTTTTGct  
cgagctggcgaattcc  
>CD\_NM\_001781.1:350  
CgCctGcgagtctGGtatGCGGCTACCAGAGGAAATGCTACTTCAAGAGAGTAGCATTTCTCTGGTAGCCATTTTTTGct  
cgagctggcgaattcc  
>CD\_NM\_001781.1:432  
CgCctGcgagtctGGtatGACTACTCTTGCTGTCATTGATTTTCAAGAGAAATCAATGACAGCAAGAGTAGCTTTTTTGct  
cgagctggcgaattcc  
>CD\_NM\_001781.1:411  
CgCctGcgagtctGGtatGCATGCTTGTCTGAACATGGTGTTC AAGAGACACCATGTTTCAGAACAAAGCATTTTTTGct  
cgagctggcgaattcc  
>CD\_NM\_001781.1:616  
CgCctGcgagtctGGtatGAAGAGGTCAGCAGCATGGAATGTTCAAGAGACATTCATGCTGCTGACCTCTGTTTTTGct  
cgagctggcgaattcc  
>CD\_NM\_001252:195  
CgCctGcgagtctGGtatGCGGGTGCGTCTTGC GGGCTGCTTTCAAGAGAAGCAGCCCGCAGGACGCACCCATTTTTTGct  
cgagctggcgaattcc  
>CD\_NM\_001252:205  
CgCctGcgagtctGGtatGATGCGGGCTGCTTTGGTCCCATTTCAAGAGAATGGGACCAAAGCAGCCCGCAGTTTTTGct  
cgagctggcgaattcc  
>CD\_NM\_001252:316  
CgCctGcgagtctGGtatGAACGTAGCTGAGCTGCAGCTGATTCAAGAGATCAGCTGCAGCTCAGCTACGTCTTTTTTGct  
cgagctggcgaattcc  
>CD\_NM\_001252:382  
CgCctGcgagtctGGtatGAGCCCAGCACTGGGCCGCTCCTTTCAAGAGAAGGAGCGGCCAGTGCTGGGCCTTTTTTGct  
cgagctggcgaattcc  
>CD\_NM\_001252:446  
CgCctGcgagtctGGtatGCTCGTGATGGCCTTACATGGTTTTCAAGAGAACCATGTAGATGCCATCACGATTTTTTGct  
cgagctggcgaattcc  
>CD\_NM\_001252:442

CgCctGcgagtctGGtatGCTCCATCGTGATGGCATCTACATTCAAGAGATGTAGATGCCATCACGATGGATTTTTTGct  
cgagctggcgaattcc  
>CD\_NM\_001252.2:481  
CgCctGcgagtctGGtatGAGCTGGCCATCTGCTCCTCCACTTCAAGAGAGTGGAGGAGCAGATGGCCAGCGTTTTTGct  
cgagctggcgaattcc  
>CD\_NM\_001252.2:317  
CgCctGcgagtctGGtatGAGTAGCTGAGCTGCAGCTGAATTTCAAGAGAATTCAGCTGCAGCTCAGCTACGTTTTTGct  
cgagctggcgaattcc  
>CD\_NM\_001252.2:484  
CgCctGcgagtctGGtatGCGGCCATCTGCTCCTCCACGACTTCAAGAGAGTCGTGGAGGAGCAGATGGCCATTTTTTGct  
cgagctggcgaattcc  
>CD\_NM\_001252.2:452  
CgCctGcgagtctGGtatGCGGCATCTACATGGTACACATCTTCAAGAGAGATGTGTACCATGTAGATGCCATTTTTTGct  
cgagctggcgaattcc  
>CD\_NM\_001252.2:588  
CgCctGcgagtctGGtatGCTCCACCAAGGTTGTACCATTGTTCAAGAGACAATGGTACAACCTTGGTGAATTTTTTGct  
cgagctggcgaattcc  
>CD\_NM\_001252.2:320  
CgCctGcgagtctGGtatGCGCTGAGCTGCAGCTGAATCACTTCAAGAGAGTGATTCAGCTGCAGCTCAGCTTTTTTGct  
cgagctggcgaattcc  
>CD\_NM\_001252.2:206  
CgCctGcgagtctGGtatGACGGGCTGCTTTGGTCCCATTGTTCAAGAGACAATGGGACCAAAGCAGCCCGTTTTTGct  
cgagctggcgaattcc  
>CD\_NM\_001252.2:563  
CgCctGcgagtctGGtatGCAGCATCAGCCTGCTGCGTCTCTTCAAGAGAGAGACGCAGCAGGCTGATGCTATTTTTTGct  
cgagctggcgaattcc  
>CD\_NM\_001252.2:572  
CgCctGcgagtctGGtatGACTGCTGCGTCTCAGCTTCCACTTCAAGAGAGTGAAGCTGAGACGCAGCAGGTTTTTGct  
cgagctggcgaattcc  
>CD\_NM\_001252.2:544  
CgCctGcgagtctGGtatGCCTGCTCTCCCGCTCCCGTAGTTCAAGAGACTACGGGAGGCGGGAGAGCAGATTTTTTGct  
cgagctggcgaattcc  
>CD\_NM\_001252.2:223  
CgCctGcgagtctGGtatGAATTGGTCGCGGGCTTGGTGATTTCAAGAGAATCACCAAGCCCGCGACCAATGTTTTTGct  
cgagctggcgaattcc  
>CD\_NM\_001252.2:396  
CgCctGcgagtctGGtatGAGCTCCTTCCTGCATGGACCAGTTCAAGAGACTGGTCCATGCAGGAAGGAGCGTTTTTGct  
cgagctggcgaattcc  
>CD\_NM\_001252.2:209  
CgCctGcgagtctGGtatGAGCTGCTTTGGTCCCATTGGTCTTCAAGAGAGACCAATGGGACCAAAGCAGCCTTTTTTGct  
cgagctggcgaattcc  
>CD\_NM\_001252.2:446  
CgCctGcgagtctGGtatGCCGTGATGGCATCTACATGGTATTCAAGAGATACCATGTAGATGCCATCACGATTTTTTGct  
cgagctggcgaattcc  
>CD\_NM\_001252.2:305  
CgCctGcgagtctGGtatGCCTTGGGTGGGACGTAGCTGAGTTCAAGAGACTCAGCTACGTCCCACCAAGTTTTTTGct  
cgagctggcgaattcc  
>CD\_NM\_001252.2:475  
CgCctGcgagtctGGtatGCGGTGACGCTGGCCATCTGCTCTTCAAGAGAGAGCAGATGGCCAGCGTCACCTTTTTTGct  
cgagctggcgaattcc  
>CD\_NM\_001252.2:230  
CgCctGcgagtctGGtatGAGCGGGCTTGGTGATCTGCCTCTTCAAGAGAGAGGCAGATCACCAAGCCCGCGTTTTTGct  
cgagctggcgaattcc  
>CD\_NM\_001252.2:654

CgCctGcgagtctGGtatGCCAACCTCACTGGGACACTTTTTCAAGAGAAAAGTGTCCCAGTGAGGTTGGTTTTTTGct  
cgagctggcgaattcc  
>CD\_NM\_001252.2:245  
CgCctGcgagtctGGtatGATGCCTCGTGGTGTGCATCCAGTTCAAGAGACTGGATGCACACCACGAGGCAGTTTTTTGct  
cgagctggcgaattcc  
>CD\_NM\_001252.2:257  
CgCctGcgagtctGGtatGATGCATCCAGCGCTTCGCACAGTTCAAGAGACTGTGCGAAGCGCTGGATGCACTTTTTTGct  
cgagctggcgaattcc  
>CD\_NM\_001252.2:272  
CgCctGcgagtctGGtatGAGCACAGGCTCAGCAGCAGCTGTTCAAGAGACAGCTGCTGCTGAGCCTGTGCGTTTTTTGct  
cgagctggcgaattcc  
>CD\_NM\_001252.2:442  
CgCctGcgagtctGGtatGCCATCGTGATGGCATCTACATTTCAAGAGAATGTAGATGCCATCACGATGGATTTTTTTGct  
cgagctggcgaattcc  
>CD\_NM\_001252.2:251  
CgCctGcgagtctGGtatGAGTGGTGTGCATCCAGCGCTTCTTCAAGAGAGAAGCGCTGGATGCACACCACGTTTTTTGct  
cgagctggcgaattcc  
>CD\_NM\_001252.2:640  
CgCctGcgagtctGGtatGAGGACACACTCTGCACCAACCTTTCAAGAGAAGTTGGTGCAGAGTGTGTCCTTTTTTGct  
cgagctggcgaattcc  
>CD\_NM\_001252.2:327  
CgCctGcgagtctGGtatGATGCAGCTGAATCACACAGGACTTCAAGAGAGTCCGTGTGTGATTTCAGCTGCAGTTTTTTGct  
cgagctggcgaattcc  
>CD\_NM\_001252.2:529  
CgCctGcgagtctGGtatGACCTGGCCGTGGGAATCTGCTCTTCAAGAGAGAGCAGATTCCCACGGCCAGGGTTTTTTGct  
cgagctggcgaattcc  
>CD\_NM\_001252.2:692  
CgCctGcgagtctGGtatGCGATGAGACCTTCTTTGGAGTGTTCAGAGACACTCCAAAGAAGGTCTCATCATTTTTTTGct  
cgagctggcgaattcc  
>CD\_NM\_003234:949  
CgCctGcgagtctGGtatGATGGTAAACTGGTCCATGCTAATTTCAAGAGATTAGCATGGACCAGTTTACCAGTTTTTTGct  
cgagctggcgaattcc  
>CD\_NM\_003234:1683  
CgCctGcgagtctGGtatGATGCATTTAAAGGCTTTCACTTTTTCAAGAGAAAAGTGAAGCCTTTAAATGCAGTTTTTTGct  
cgagctggcgaattcc  
>CD\_NM\_003234:1757  
CgCctGcgagtctGGtatGAAGCCCCTGTTGTATACGCTTTTTCAAGAGAAAAGCGTATACAACAGTGGGCTGTTTTTTGct  
cgagctggcgaattcc  
>CD\_NM\_003234:1809  
CgCctGcgagtctGGtatGACGGTTACTGGGCAATTTCTATTTTCAAGAGAAATAGAAATTGCCAGTAACCGTTTTTTGct  
cgagctggcgaattcc  
>CD\_NM\_003234:1882  
CgCctGcgagtctGGtatGATGCTTTCCCTTTCCTTGCATATTCAAGAGATATGCAAGGAAAGGGAAAGCAGTTTTTTGct  
cgagctggcgaattcc  
>CD\_NM\_003234:2041A  
CgCctGcgagtctGGtatGCCGCTGGTCAGTTCGTGATTAATTTCAAGAGATTAATCACGAACTGACCAGCGATTTTTTTGct  
cgagctggcgaattcc  
>CD\_NM\_003234.1:1087  
CgCctGcgagtctGGtatGCGCAATTGGTGTGTTGATATACTTCAAGAGAGTATATCAACACACCAATTGCATTTTTTTGct  
cgagctggcgaattcc  
>CD\_NM\_003234.1:631  
CgCctGcgagtctGGtatGCTGGGATGACCTGAAGAGAAAAGTTCAAGAGACTTCTCTTCAGGTCATCCCAATTTTTTTGct  
cgagctggcgaattcc  
>CD\_NM\_003234.1:2065



CgCctGcgagtctGGtatGCACCCATGATGTTGAATTGAACTTCAAGAGAGTTCAATTCAACATCATGGGTTTTTTTgct  
cgagctggcgaattcc  
>CD\_NM\_003234.1:450  
CgCctGcgagtctGGtatGATGGAAGTATCTGCTATGGGACTTCAAGAGAGTCCCATAGCAGATACTTCCACTTTTTTgct  
cgagctggcgaattcc  
>CD\_NM\_003234.1:886  
CgCctGcgagtctGGtatGCCTTGTTTACCTGGTGGAGAATTTCAAGAGAATTTCTCCACCAGGTAAACAAGTTTTTTGct  
cgagctggcgaattcc  
>CD\_NM\_003234.1:688  
CgCctGcgagtctGGtatGAACCATCAAGCTGCTGAATGAATTTCAAGAGATTCATTCAGCAGCTTGATGGTGTTTTTGct  
cgagctggcgaattcc  
>CD\_NM\_003234.1:2041BF  
CgCctGcgagtctGGtatGAGCTGGTCAGTTCGTGATTAAATTTCAAGAGATTTAATCACGAACTGACCAGCGTTTTTgct  
cgagctggcgaattcc  
>CD\_NM\_003234.1:1882  
CgCctGcgagtctGGtatGCGCTTTCCCTTTCCTTGCATATTTCAAGAGAATATGCAAGGAAAGGGAAAGCATTTTTGct  
cgagctggcgaattcc  
>CD\_NM\_003234.1:1691  
CgCctGcgagtctGGtatGCAGGCTTTCACTTATATTAATCTTCAAGAGAGATTAATATAAGTGAAAGCCTTTTTTgct  
cgagctggcgaattcc  
>CD\_NM\_003234.1:1855  
CgCctGcgagtctGGtatGCGTTGAGAACTCACTTTACTTCAAGAGAGTCTAAAGTGAGTTTCTCAACTTTTTTgct  
cgagctggcgaattcc  
>CD\_NM\_003234.1:2257  
CgCctGcgagtctGGtatGCACAGACAGATTTGTCATGAAGTTCAAGAGACTTCATGACAAATCTGTCTGTTTTTTgct  
cgagctggcgaattcc  
>CD\_NM\_003234.1:2041  
CgCctGcgagtctGGtatGCGGTCAGTTCGTGATTAACTATTCAAGAGATAGTTTAATCACGAACTGACCATTTTTGct  
cgagctggcgaattcc  
>CD\_NM\_003234.1:2109  
CgCctGcgagtctGGtatGACCAACTGCTTTCATTTGTGAGTTCAAGAGACTCACAAATGAAAGCAGTTGGCTTTTTGct  
cgagctggcgaattcc  
>CD\_NM\_003234.1:380  
CgCctGcgagtctGGtatGATTGCTGTAGATGAAGAAGAAATTTCAAGAGATTTCTTCTTCATCTACAGCAAGTTTTTgct  
cgagctggcgaattcc  
>CD\_NM\_003234.1:1297  
CgCctGcgagtctGGtatGATTTGGGAATATGGAAGGAGACTTCAAGAGAGTCTCCTTCCATATTCCCAAACTTTTTgct  
cgagctggcgaattcc  
>CD\_NM\_003234.1:1649  
CgCctGcgagtctGGtatGACCACTGAATGGCTAGAGGGATTTCAAGAGAATCCCTCTAGCCATTCAGTGGCTTTTTGct  
cgagctggcgaattcc  
>CD\_NM\_003234.1:797  
CgCctGcgagtctGGtatGCGCAAAGTCTGGCGTGATCAACTTCAAGAGAGTTGATCACGCCAGACTTTGCTTTTTTgct  
cgagctggcgaattcc  
>CD\_NM\_003234.1:2377  
CgCctGcgagtctGGtatGATCTCACACGCTGCCAGCTTTATTCAAGAGATAAAGCTGGCAGCGTGTGAGAGTTTTTgct  
cgagctggcgaattcc  
>CD\_NM\_003234.1:2046  
CgCctGcgagtctGGtatGATCAGTTCGTGATTAACTAACTTCAAGAGAGTTAGTTTAATCACGAACTGACTTTTTTgct  
cgagctggcgaattcc  
>CD\_NM\_003234.1:469  
CgCctGcgagtctGGtatGAACTATTGCTGTGATCGTCTTTTTTCAAGAGAAAAGACGATCACAGCAATAGTCTTTTTTgct  
cgagctggcgaattcc  
>CD\_NM\_003234.1:1004

CgCctGcgagtctGGtatGCCTCCTGTGAATGGATCTATAGTTCAAGAGACTATAGATCCATTCACAGGAGTTTTTTGct  
cgagctggcgaattcc  
>CD\_NM\_003234.1:1390  
CgCctGcgagtctGGtatGCGTGAGCAATGTGCTGAAAGAGTTCAAGAGACTCTTTCAGCACATTGCTCACATTTTTGct  
cgagctggcgaattcc  
>CD\_NM\_003234.1:722  
CgCctGcgagtctGGtatGACTCGTGAGGCTGGATCTCAAATTC AAGAGATTTGAGATCCAGCCTCACGAGGTTTTTTGct  
cgagctggcgaattcc  
>CD\_NM\_003234.1:1548  
CgCctGcgagtctGGtatGCTGCCAGATGTTCTCAGATATTTCAAGAGAATATCTGAGAACATCTGGGCAATTTTTGct  
cgagctggcgaattcc  
>CD\_NM\_003234.1:1117  
CgCctGcgagtctGGtatGAACTAAATTTCCCATTTGTTAACTTCAAGAGAGTTAACAATGGGAAATTTAGTCTTTTTGct  
cgagctggcgaattcc  
>CD\_NM\_003234.1:374  
CgCctGcgagtctGGtatGCTGAAACTTGCTGTAGATGAAGTTCAAGAGACTTCATCTACAGCAAGTTTCATTTTTGct  
cgagctggcgaattcc  
>CD\_NM\_003234.1:1813  
CgCctGcgagtctGGtatGCACTGGGCAATTTCTATATCAGTTCAAGAGACTGATATAGAAATTGCCAGTATTTTTGct  
cgagctggcgaattcc  
>CD\_NM\_001782:370  
CgCctGcgagtctGGtatGCGCCGCACAACCTGCCTGCGATTTCAAGAGAATCGCAGGCAGGTTGTGCGGCATTTTTGct  
cgagctggcgaattcc  
>CD\_NM\_001782:801  
CgCctGcgagtctGGtatGATGCTGTCCGTCGGGATGGATATTTCAAGAGATATCCATCCCCGACGGACAGCAGTTTTTTGct  
cgagctggcgaattcc  
>CD\_NM\_001782:907  
CgCctGcgagtctGGtatGCAGCTGGCCACATTCAGTGAAATTTCAAGAGATTTCACTGAATGTGGCCAGCTTTTTTTGct  
cgagctggcgaattcc  
>CD\_NM\_001782:971  
CgCctGcgagtctGGtatGCGCCAAATGGTGGTTCAGGGAATTTCAAGAGATTCCTGAACCACCATTTGGCATTTTTGct  
cgagctggcgaattcc  
>CD\_NM\_001782:1050  
CgCctGcgagtctGGtatGCCGCACTAGGACTTATGCTCAATTTCAAGAGATTGAGCATAAGTCCTAGTGCGTTTTTTGct  
cgagctggcgaattcc  
>CD\_NM\_001782:1056  
CgCctGcgagtctGGtatGCAGGACTTATGCTCAAAGCTCATTTCAAGAGATGAGCTTTGAGCATAAGTCCTATTTTTGct  
cgagctggcgaattcc  
>CD\_NM\_001782.1:912  
CgCctGcgagtctGGtatGACCACATTCAGTGAAATTTATCTTCAAGAGAGATAAATTTCACTGAATGTGGCTTTTTTTGct  
cgagctggcgaattcc  
>CD\_NM\_001782.1:1117  
CgCctGcgagtctGGtatGCGGAGTCAGAGTCATGTAGAAGTTCAAGAGACTTCTACATGACTCTGACTCCATTTTTGct  
cgagctggcgaattcc  
>CD\_NM\_001782.1:1056  
CgCctGcgagtctGGtatGCGGACTTATGCTCAAAGCTCAATTTCAAGAGATTGAGCTTTGAGCATAAGTCCTTTTTTTGct  
cgagctggcgaattcc  
>CD\_NM\_001782.1:918  
CgCctGcgagtctGGtatGCTCAGTGAAATTTATCCACAATTTCAAGAGAATTTGTGGATAAATTTCACTGAATTTTTTTGct  
cgagctggcgaattcc  
>CD\_NM\_001782.1:940  
CgCctGcgagtctGGtatGAACACTCTTACTACTTCTTAAATTTCAAGAGATTTAAGAAGTAGTAAGAGTGTTTTTTTGct  
cgagctggcgaattcc  
>CD\_NM\_001782.1:956

CgCtGcgagtctGGtatGATTAAATTCAGTGTGCCAAATTTCAAGAGAATTTGGCAACAGTGAATTTAAGTTTTTGct  
cgagctggcgaattcc  
>CD\_NM\_001782.1:1026  
CgCtGcgagtctGGtatGCGGAAGTTGACTGATGATACACTTCAAGAGAGTGTATCATCAGTCAACTTCCATTTTTTGct  
cgagctggcgaattcc  
>CD\_NM\_001782.1:801  
CgCtGcgagtctGGtatGCGCTGTCCGTCGGGATGGATAATTTCAAGAGATTATCCATCCCGACGGACAGCATTTTTTGct  
cgagctggcgaattcc  
>CD\_NM\_001782.1:674  
CgCtGcgagtctGGtatGAGCAGACAGACAGAAGACGAAGTTCAAGAGACTTCGTCTTCTGTCTGTCTGCCTTTTTTGct  
cgagctggcgaattcc  
>CD\_NM\_001782.1:887  
CgCtGcgagtctGGtatGCTGTGAAACTCTGTCTTCCAAGTTCAAGAGACTTGGAAGACAGAGTTTACATTTTTTGct  
cgagctggcgaattcc  
>CD\_NM\_001782.1:1144  
CgCtGcgagtctGGtatGCTCCCTACATCTGTGAGATGACTTCAAGAGAGTCATCTCACAGATGTAGGGAATTTTTTGct  
cgagctggcgaattcc  
>CD\_NM\_001782.1:555  
CgCtGcgagtctGGtatGATGGGACAGAGTGCAGAGGATCTTCAAGAGAGATCCTCTGCACTCTGTCCCAGTTTTTGct  
cgagctggcgaattcc  
>CD\_NM\_001782.1:699  
CgCtGcgagtctGGtatGCCCTTGCAAAGTGAGGAGCAACTTCAAGAGAGTTGCTCCTCACTTTGCAAGTTTTTTTGct  
cgagctggcgaattcc  
>CD\_NM\_001782.1:934  
CgCtGcgagtctGGtatGAACAATCACACTCTTACTACTTTTTCAAGAGAAAGTAGTAAGAGTGTGATTGTGTTTTTGct  
cgagctggcgaattcc  
>CD\_NM\_001782.1:1050  
CgCtGcgagtctGGtatGAGCACTAGGACTTATGCTCAAATTTCAAGAGATTTGAGCATAAGTCCTAGTGCCTTTTTTGct  
cgagctggcgaattcc  
>CD\_NM\_001782.1:370  
CgCtGcgagtctGGtatGACCGCACAACTGCCTGCGATATTTCAAGAGATATCGCAGGCAGGTTGTGCGGTTTTTTGct  
cgagctggcgaattcc  
>CD\_NM\_001782.1:795  
CgCtGcgagtctGGtatGAACACCTGCTGTCCGTCGGGATTTCAAGAGAATCCCGACGGACAGCAGGTGTCTTTTTTGct  
cgagctggcgaattcc  
>CD\_NM\_001782.1:524  
CgCtGcgagtctGGtatGAAGGCAGCAGCTCCGCCTCAAGTTCAAGAGACTTGAGGCGGAGCTGCTGCCTTTTTTTGct  
cgagctggcgaattcc  
>CD\_NM\_001782.1:128  
CgCtGcgagtctGGtatGCGCAGATCTGAGGTTTGTGAAGTTCAAGAGACTTCACAAACCTCAGATCTGCATTTTTTGct  
cgagctggcgaattcc  
>CD\_NM\_001782.1:907  
CgCtGcgagtctGGtatGCGCTGGCCACATTCAGTGAATTTCAAGAGAATTTCACTGAATGTGGCCAGCTTTTTTTGct  
cgagctggcgaattcc  
>CD\_NM\_001782.1:505  
CgCtGcgagtctGGtatGCAGTCACTAACAGCAGCCTGAGTTCAAGAGACTCAGGCTGCTGTTAGTGACTTTTTTTGct  
cgagctggcgaattcc  
>CD\_NM\_001782.1:264  
CgCtGcgagtctGGtatGCGCTTGGCTTCTTCTGTACTAGTTCAAGAGACTAGTACAGAAGAAGCCAAGCTTTTTTTGct  
cgagctggcgaattcc  
>CD\_NM\_001782.1:812  
CgCtGcgagtctGGtatGAGGATGGATAATGCATCAGAAATTTCAAGAGATTTCTGATGCATTATCCATCCCTTTTTTGct  
cgagctggcgaattcc  
>CD\_NM\_001782.1:529

CgCctGcgagtctGGtatGCGCAGCTCCGCCTCAAGATAACTTCAAGAGAGTTATCTTGAGGCGGAGCTGCTTTTTTgct  
cgagctggcgaattcc  
>CD\_NM\_001782.1:1166  
CgCctGcgagtctGGtatGCGCTTTCAGGTTCCAGATTAGTTCAAGAGACTAATCTGGAAACCTGAAAGCTTTTTTgct  
cgagctggcgaattcc  
>CD\_NM\_001782.1:910  
CgCctGcgagtctGGtatGCGGCCACATTCAGTGAAATTTATTCAAGAGATAAATTTCACTGAATGTGGCCATTTTTGct  
cgagctggcgaattcc  
>CD\_NM\_001782.1:261  
CgCctGcgagtctGGtatGCCAAGCTTGGCTTCTTCTGTACTTCAAGAGAGTACAGAAGAAGCCAAGCTTGATTTTTGct  
cgagctggcgaattcc  
>CD\_NM\_002526:490  
CgCctGcgagtctGGtatGAGGGCCACTAGCATCTCAAATATTCAAGAGATATTTGAGATGCTAGTGGCCCCTTTTGct  
cgagctggcgaattcc  
>CD\_NM\_002526:513  
CgCctGcgagtctGGtatGAAGGACTTTATTTGCCATATAAATTCAAGAGATTATATGGCAAATAAAGTCCTGTTTTGct  
cgagctggcgaattcc  
>CD\_NM\_002526:944  
CgCctGcgagtctGGtatGCACGTCATCTCTTCCCATGGAATTCAGAGATCCATGGGAAGAGATGACGTTTTTTGct  
cgagctggcgaattcc  
>CD\_NM\_002526:1163  
CgCctGcgagtctGGtatGCACCTGAGACACACGGATGAAATTCAGAGATTTTCATCCGTGTGTCTCAGTTTTTTGct  
cgagctggcgaattcc  
>CD\_NM\_002526:1443  
CgCctGcgagtctGGtatGATGGAGACAGAGTAGTCAAATTTTTCAAGAGAAATTTGACTACTCTGTCTCCAGTTTTTgct  
cgagctggcgaattcc  
>CD\_NM\_002526:1491  
CgCctGcgagtctGGtatGCGCCAGTTATGACCCTCTCAATTCAGAGATTGAGAGGGTCATAACTGGGCATTTTTGct  
cgagctggcgaattcc  
>CD\_NM\_002526.1:513  
CgCctGcgagtctGGtatGCGGACTTTATTTGCCATATAAATTCAGAGATTTATATGGCAAATAAAGTCCTTTTTTgct  
cgagctggcgaattcc  
>CD\_NM\_002526.1:1140  
CgCctGcgagtctGGtatGCTGTGATGCAATGATTAACAACCTTCAAGAGAGTTGTTAATCATTGCATCACAATTTTTGct  
cgagctggcgaattcc  
>CD\_NM\_002526.1:720  
CgCctGcgagtctGGtatGCATGGATAAACTCATCGCTCAGTTCAAGAGACTGAGCGATGAGTTTATCCATTTTTTgct  
cgagctggcgaattcc  
>CD\_NM\_002526.1:988  
CgCctGcgagtctGGtatGCTTCTGAAGATCCAAGCATAAATTCAGAGATTATGCTTGGATCTTCAGGAATTTTTTgct  
cgagctggcgaattcc  
>CD\_NM\_002526.1:1407  
CgCctGcgagtctGGtatGAGGAATCCATGTGGTGTATGATTTCAAGAGAATCATAACCCACATGGATTCCGTTTTTgct  
cgagctggcgaattcc  
>CD\_NM\_002526.1:612  
CgCctGcgagtctGGtatGAACAAATTTAGTGTTTGAAGATTTCAAGAGAATCTTCAAACACTAAATTTGTCTTTTTGct  
cgagctggcgaattcc  
>CD\_NM\_002526.1:1173  
CgCctGcgagtctGGtatGAACGGATGAAATGTTCTGGAACCTTCAAGAGAGTTCCAGAACATTTTCATCCGTGTTTTTgct  
cgagctggcgaattcc  
>CD\_NM\_002526.1:919  
CgCctGcgagtctGGtatGCAGATCGAGTTTGTGAAAGAGTTCAAGAGACTCTTTCATCAAACCTCGATTTTTTTGct  
cgagctggcgaattcc  
>CD\_NM\_002526.1:906

CgCtGcgagtctGGtatGACTAGGCTATCTGAAGATCGAGTTCAAGAGACTCGATCTTCAGATAGCCTAGGTTTTTGct  
cgagctggcgaattcc  
>CD\_NM\_002526.1:1125  
CgCtGcgagtctGGtatGAATGGGCAACCTGATTTGTGATTTCAAGAGAATCACAATCAGGTTGCCATGTTTTTGct  
cgagctggcgaattcc  
>CD\_NM\_002526.1:616  
CgCtGcgagtctGGtatGCATTTAGTGTTTGAAGATGAAATTTCAAGAGATTTTCATCTTCAAACACTAAATTTTTTTGct  
cgagctggcgaattcc  
>CD\_NM\_002526.1:555  
CgCtGcgagtctGGtatGCGTTGTGGGAATCGTTGGATACTTCAAGAGAGTATCCAACGATTCCCACAACTTTTTTGct  
cgagctggcgaattcc  
>CD\_NM\_002526.1:429  
CgCtGcgagtctGGtatGAATCGAGCCACTCCTCAAAGAGTTCAAGAGACTCTTTGAGGAGTGGCTCGATCTTTTTGct  
cgagctggcgaattcc  
>CD\_NM\_002526.1:546  
CgCtGcgagtctGGtatGCGGTGATGAAGTTGTGGGAATCTTCAAGAGAGATTTCCACAACCTTCATCACCATTTTTGct  
cgagctggcgaattcc  
>CD\_NM\_002526.1:960  
CgCtGcgagtctGGtatGCGGAAATCCCATTTCTTCTAAACTTCAAGAGAGTTTAGAAGAATGGGATTTCCATTTTTGct  
cgagctggcgaattcc  
>CD\_NM\_002526.1:490  
CgCtGcgagtctGGtatGAGGCCACTAGCATCTCAAATATTTCAAGAGAATATTTGAGATGCTAGTGGCCTTTTTTGct  
cgagctggcgaattcc  
>CD\_NM\_002526.1:525  
CgCtGcgagtctGGtatGACCATATAAAGTTCTTCTGTTTTTCAAGAGAAACAGGAAGAACTTTATATGGCTTTTTTTGct  
cgagctggcgaattcc  
>CD\_NM\_002526.1:773  
CgCtGcgagtctGGtatGAACACTCCAACACATTTCTTTATTCAAGAGATAAAGAAATGTGTTGGAGTGTCTTTTTGct  
cgagctggcgaattcc  
>CD\_NM\_002526.1:1693  
CgCtGcgagtctGGtatGCCACAGGAAGTCACTGCCATGTTCAAGAGACATGGCAGTGACTTCTGTGGATTTTTTTGct  
cgagctggcgaattcc  
>CD\_NM\_002526.1:397  
CgCtGcgagtctGGtatGCATCATGAATTTGATAATGGTGTTCAGAGACACCATTATCAAATTCATGATTTTTTTGct  
cgagctggcgaattcc  
>CD\_NM\_002526.1:637  
CgCtGcgagtctGGtatGCTCACTGCATTACAACCTGAAGTTCAAGAGACTTCAGGTTGTAATGCAGTGATTTTTTTGct  
cgagctggcgaattcc  
>CD\_NM\_002526.1:1256  
CgCtGcgagtctGGtatGCTGGCACAATTACCTGGGAGAATTCAAGAGATTTCTCCAGGTAATTGTGCCATTTTTTTGct  
cgagctggcgaattcc  
>CD\_NM\_002526.1:568  
CgCtGcgagtctGGtatGATTGGATACACTTCCAAGAAATTTCAAGAGATTTCTTTGGAAGTGTATCCAACTTTTTTGct  
cgagctggcgaattcc  
>CD\_NM\_002526.1:538  
CgCtGcgagtctGGtatGATTCCTGTTGGTGTGAAGTTGTTCAAGAGACAACCTTCATCACCAACAGGAAGTTTTTTGct  
cgagctggcgaattcc  
>CD\_NM\_002526.1:841  
CgCtGcgagtctGGtatGCTCATAGTCACTTCTGATGATGTTCAAGAGACATCATCAGAAGTGACTATGAATTTTTTTGct  
cgagctggcgaattcc  
>CD\_NM\_002526.1:468  
CgCtGcgagtctGGtatGAAGTGCAAACATTAAGCAAAGTTCAAGAGACTTTGCTTTAATGTTTGCCTTTTTTTGct  
cgagctggcgaattcc  
>CD\_NM\_002526.1:1697

CgCctGcgagtctGGtatGAAGGAAGTCACTGCCATGGAAGTTCAAGAGACTTCCATGGCAGTGACTTCTGTTTTTGct  
cgagctggcgaattcc  
>CD\_NM\_004355:590  
CgCctGcgagtctGGtatGAAGCAGGCACTCCTTGGAGCAATTCAAGAGATTGCTCCAAGGAGTGCCTGCTTTTTTGct  
cgagctggcgaattcc  
>CD\_NM\_004355:69  
CgCctGcgagtctGGtatGAAGCGCGACCTTATCTCCAACATTCAAGAGATGTTGGAGATAAGGTTCGCGCTGTTTTTGct  
cgagctggcgaattcc  
>CD\_NM\_004355:307  
CgCctGcgagtctGGtatGCGCCTCCAAGCCTGTGAGCAATTCAAGAGATTGCTCACAGGCTTGGGAGGCTTTTTTGct  
cgagctggcgaattcc  
>CD\_NM\_004355:72  
CgCctGcgagtctGGtatGAGCGACCTTATCTCCAACAATGTTCAAGAGACATTGTTGGAGATAAGGTTCGCGTTTTTGct  
cgagctggcgaattcc  
>CD\_NM\_004355:496  
CgCctGcgagtctGGtatGCCCCGAGAACCTGAGACACCTTTCAAGAGAAGGTGTCTCAGGTTCTCCGGGATTTTTGct  
cgagctggcgaattcc  
>CD\_NM\_004355:565  
CgCctGcgagtctGGtatGCGCACCATTGGCTCCTGTTTGATTCAAGAGATCAAACAGGAGCCAATGGTGCATTTTTGct  
cgagctggcgaattcc  
>CD\_NM\_004355:70  
CgCctGcgagtctGGtatGCGCGCGACCTTATCTCCAACAATTCAAGAGATTGTTGGAGATAAGGTTCGCGCTTTTTTGct  
cgagctggcgaattcc  
>CD\_NM\_001025159.1:614  
CgCctGcgagtctGGtatGACCACTGACGCTCCACCGAAAGTTCAAGAGACTTTCGGTGGAGCGTCAGTGGGTTTTTGct  
cgagctggcgaattcc  
>CD\_NM\_001025159.1:262  
CgCctGcgagtctGGtatGATCCCAGAACCTGCAGCTGGAGTTCAAGAGACTCCAGCTGCAGGTTCTGGGAGTTTTTGct  
cgagctggcgaattcc  
>CD\_NM\_001025159.1:823  
CgCctGcgagtctGGtatGAAGTGAGTCACTGGAAGTGGAGTTCAAGAGACTCCAGTTCAGTGACTCACTGTTTTTGct  
cgagctggcgaattcc  
>CD\_NM\_001025159.1:625  
CgCctGcgagtctGGtatGCCACCGAAAGTACTGACCAAGTTCAAGAGACTTGGTCAGTACTTTCGGTGGATTTTTGct  
cgagctggcgaattcc  
>CD\_NM\_001025159.1:249  
CgCctGcgagtctGGtatGCACTGACAGTCACCTCCCAGAATTCAAGAGATTCTGGGAGGTGACTGTCAGTTTTTTGct  
cgagctggcgaattcc  
>CD\_NM\_001025159.1:277  
CgCctGcgagtctGGtatGACTGGAGAACCTGCGCATGAAGTTCAAGAGACTTCATGCGCAGGTTCTCCAGCTTTTTTGct  
cgagctggcgaattcc  
>CD\_NM\_001025159.1:715  
CgCctGcgagtctGGtatGAGGCAACTATCTGCCACTCCAGTTCAAGAGACTGGAGTGGCAGATAGTTGCCGTTTTTGct  
cgagctggcgaattcc  
>CD\_NM\_001025159.1:208  
CgCctGcgagtctGGtatGAACCGCTACTTCTGTACCAGTTCAAGAGACTGGTACAGGAAGTAGGCCGTTTTTTGct  
cgagctggcgaattcc  
>CD\_NM\_001025159.1:565  
CgCctGcgagtctGGtatGACACCATTGGCTCCTGTTTGAATTCAAGAGATTCAAACAGGAGCCAATGGTGCATTTTTGct  
cgagctggcgaattcc  
>CD\_NM\_001025159.1:726  
CgCctGcgagtctGGtatGCGCCACTCCAGTGCTATGGGAGTTCAAGAGACTCCCATAGCACTGGAGTGGCATTTTTGct  
cgagctggcgaattcc  
>CD\_NM\_001025159.1:537

CgCctGcgagtctGGtatGCAGACTGGAAGGTCTTTGAGAGTTCAAGAGACTCTCAAAGACCTTCCAGTCTATTTTTGct  
cgagctggcgaattcc  
>CD\_NM\_001025159.1:567  
CgCctGcgagtctGGtatGCCATTGGCTCCTGTTTCAAATTTCAAGAGAATTTCAAACAGGAGCCAATGGTTTTTTGct  
cgagctggcgaattcc  
>CD\_NM\_001025159.1:391  
CgCctGcgagtctGGtatGAATGCAGAAATGCCACCAAGTATTTCAAGAGAATACTTGGTGGCATTCTGCATGTTTTTTGct  
cgagctggcgaattcc  
>CD\_NM\_001025159.1:433  
CgCctGcgagtctGGtatGCGTGATGCACCTGCTCCAGAATTTCAAGAGAATTTCTGGAGCAGGTGCATCACATTTTTGct  
cgagctggcgaattcc  
>CD\_NM\_001025159.1:856  
CgCctGcgagtctGGtatGCGGGCTGGGTGTGACCAAGCAGTTCAAGAGACTGCTTGGTCACACCCAGCCATTTTTGct  
cgagctggcgaattcc  
>CD\_NM\_001025159.1:70  
CgCctGcgagtctGGtatGACGCGACCTTATCTCCAACAATTTCAAGAGAATTTGTTGGAGATAAGGTCGCGCTTTTTGct  
cgagctggcgaattcc  
>CD\_NM\_001025159.1:72  
CgCctGcgagtctGGtatGACGACCTTATCTCCAACAATGATTCAAGAGATCATTGTTGGAGATAAGGTCGCTTTTTGct  
cgagctggcgaattcc  
>CD\_NM\_001025159.1:496  
CgCctGcgagtctGGtatGACCGGAGAACCTGAGACACCTTTTTCAAGAGAAAGGTGTCTCAGGTTCTCCGGTTTTTTGct  
cgagctggcgaattcc  
>CD\_NM\_001025159.1:307  
CgCctGcgagtctGGtatGACCTCCCAAGCCTGTGAGCAAGTTCAAGAGACTTGCTCACAGGCTTGGGAGGCTTTTTGct  
cgagctggcgaattcc  
>CD\_NM\_001025159.1:504  
CgCctGcgagtctGGtatGCCCTGAGACACCTTAAGAACACTTCAAGAGAGTGTCTTAAGGTGTCTCAGGTTTTTTGct  
cgagctggcgaattcc  
>CD\_NM\_001025159.1:310  
CgCctGcgagtctGGtatGCCCCAAGCCTGTGAGCAAGATGTTCAAGAGACATCTTGCTCACAGGCTTGGGATTTTTGct  
cgagctggcgaattcc  
>CD\_NM\_001025159.1:741  
CgCctGcgagtctGGtatGCTGGGAGCATCGGCTACTGCTGTTCAAGAGACAGCAGTAGCCGATGCTCCATTTTTTTGct  
cgagctggcgaattcc  
>CD\_NM\_001025159.1:12  
CgCctGcgagtctGGtatGCGCACAGGAGGAGAAGCAGGAGTTCAAGAGACTCCTGCTTCTCCTCCTGTGCATTTTTTTGct  
cgagctggcgaattcc  
>CD\_NM\_001025159.1:498  
CgCctGcgagtctGGtatGAGGAGAACCTGAGACACCTTAATTCAAGAGATTAAGGTGTCTCAGGTTCTCCGTTTTTTGct  
cgagctggcgaattcc  
>CD\_NM\_001025159.1:682  
CgCctGcgagtctGGtatGACCGGGTTCATTCAGGCCCAAGTTCAAGAGACTTGGGCCTGAATGAACCCGGGTTTTTTGct  
cgagctggcgaattcc  
>CD\_NM\_001025159.1:810  
CgCctGcgagtctGGtatGAGCACCATAACTGCAGTGAGTCTTCAAGAGAGACTCACTGCAGTTATGGTGCCTTTTTTTGct  
cgagctggcgaattcc  
>CD\_NM\_021601:747  
CgCctGcgagtctGGtatGCACCTGGACGACTGCTCCATGTTTCAAGAGAACATGGAGCAGTCGTCAGGTTTTTTTTGct  
cgagctggcgaattcc  
>CD\_NM\_021601:261  
CgCctGcgagtctGGtatGCGCCAGGCCCTGTGGATGCACATTTCAAGAGATGTGCATCCACAGGGCCTGGCATTTTTTTGct  
cgagctggcgaattcc  
>CD\_NM\_021601:582

CgCtGcgagtctGGtatGAGGGAGGGCACCAAGAACCGAATTCAAGAGATTCGGTTCCTGGTGCCCTCCCTTTTTGct  
cgagctggcgaattcc  
>CD\_NM\_021601:804  
CgCtGcgagtctGGtatGAAGGATGTGGGCAGCCTCAACATTCAAGAGATGTTGAGGCTGCCACATCCTGTTTTGct  
cgagctggcgaattcc  
>CD\_NM\_021601:801  
CgCtGcgagtctGGtatGCACCAGGATGTGGGCAGCCTCATTCAAGAGATGAGGCTGCCACATCCTGGTATTTTTGct  
cgagctggcgaattcc  
>CD\_NM\_021601:588  
CgCtGcgagtctGGtatGAGCACCAAGAACCGAATCATCATTCAAGAGATGATGATTCGGTTCCTGGTGCCTTTTGct  
cgagctggcgaattcc  
>CD\_NM\_021601:652  
CgCtGcgagtctGGtatGAGACGCTGCTGCTGTTTCAGGAATTCAAGAGATTCCTGAACAGCAGCAGCGTCCTTTTGct  
cgagctggcgaattcc  
>CD\_NM\_021601:334  
CgCtGcgagtctGGtatGACCCGCACAATAGCAGCAACAATTCAAGAGATGTTGCTGCTATTGTGCGGGCTTTTTGct  
cgagctggcgaattcc  
>CD\_NM\_021601:321  
CgCtGcgagtctGGtatGACCCACTTCCAATGCCCGCACATTCAAGAGATGTGCGGGCATTGGAAGTGGGCTTTTTGct  
cgagctggcgaattcc  
>CD\_NM\_001783.2:652  
CgCtGcgagtctGGtatGAACGCTGCTGCTGTTTCAGGAAATTCAAGAGATTCCTGAACAGCAGCAGCGTCTTTTTGct  
cgagctggcgaattcc  
>CD\_NM\_001783.2:261  
CgCtGcgagtctGGtatGACCAGGCCCTGTGGATGCACAATTCAAGAGATGTTGCATCCACAGGGCTGGCTTTTTGct  
cgagctggcgaattcc  
>CD\_NM\_001783.2:646  
CgCtGcgagtctGGtatGACCTGGGACGCTGCTGCTGTTCTTCAAGAGAGAACAGCAGCAGCGTCCAGGCTTTTTGct  
cgagctggcgaattcc  
>CD\_NM\_001783.2:334  
CgCtGcgagtctGGtatGACCCGCACAATAGCAGCAACAATTCAAGAGAGTTGTTGCTGCTATTGTGCGGGTTTTGct  
cgagctggcgaattcc  
>CD\_NM\_001783.2:826  
CgCtGcgagtctGGtatGCGGAGATGTCCAGCTGGAGAAGTTCAAGAGACTTCTCCAGCTGGACATCTCCTTTTTGct  
cgagctggcgaattcc  
>CD\_NM\_001783.2:370  
CgCtGcgagtctGGtatGATGGCGCGTCCCTCCATGGCAACTTCAAGAGAGTTGCCATGGAGGACGCGCCACTTTTTGct  
cgagctggcgaattcc  
>CD\_NM\_001783.2:321  
CgCtGcgagtctGGtatGACCACTTCCAATGCCCGCACAAATTCAAGAGATGTTGCGGGCATTGGAAGTGGGTTTTGct  
cgagctggcgaattcc  
>CD\_NM\_001783.2:441  
CgCtGcgagtctGGtatGAGCTGATCATCCAGAATGTGAATTCAAGAGATTCACATTCTGGATGATCAGCGTTTTGct  
cgagctggcgaattcc  
>CD\_NM\_001783.2:663  
CgCtGcgagtctGGtatGCGTTCAGGAAACGATGGCAGAATTCAAGAGATTCGCCATCGTTTCTGAACATTTTTGct  
cgagctggcgaattcc  
>CD\_NM\_001783.2:207  
CgCtGcgagtctGGtatGATGCCACCATCTTCTCTCTTTTTCAAGAGAAAGAGGAGGAAGATGGTGGCAGTTTTGct  
cgagctggcgaattcc  
>CD\_NM\_001783.2:439  
CgCtGcgagtctGGtatGCACGCTGATCATCCAGAATGTGTTCAAGAGACACATTCTGGATGATCAGCGTATTTTTGct  
cgagctggcgaattcc  
>CD\_NM\_001783.2:436



CgCctGcgagtctGGtatGCGGTACGCTGATCATCCAGAATTTCAAGAGAATTCTGGATGATCAGCGTACCATTTTTTGct  
cgagctggcgaattcc  
>CD\_NM\_001783.2:259  
CgCctGcgagtctGGtatGATGCCAGGCCCTGTGGATGCACTTCAAGAGAGTGCATCCACAGGGCCTGGCACTTTTTTGct  
cgagctggcgaattcc  
>CD\_NM\_001783.2:265  
CgCctGcgagtctGGtatGAGCCCTGTGGATGCACAAGGTCTTCAAGAGAGACCTTGTGCATCCACAGGGCCTTTTTTGct  
cgagctggcgaattcc  
>CD\_NM\_001783.2:433  
CgCctGcgagtctGGtatGAAATGGTACGCTGATCATCCAGTTCAAGAGACTGGATGATCAGCGTACCATTGTTTTTGct  
cgagctggcgaattcc  
>CD\_NM\_001783.2:448  
CgCctGcgagtctGGtatGAATCCAGAATGTGAACAAGAGCTTCAAGAGAGCTCTTGTTCACATTCTGGATGTTTTTGct  
cgagctggcgaattcc  
>CD\_NM\_001783.2:823  
CgCctGcgagtctGGtatGAATAGGAGATGTCCAGCTGGAGTTCAAGAGACTCCAGCTGGACATCTCCTATGTTTTTGct  
cgagctggcgaattcc  
>CD\_NM\_001783.2:199  
CgCctGcgagtctGGtatGCGCTCTGCCCTGCCACCATCTTCTTCAAGAGAGAAGATGGTGGCAGGCAGAGCTTTTTTGct  
cgagctggcgaattcc  
>CD\_NM\_001783.2:375  
CgCctGcgagtctGGtatGACGTCTCCATGGCAACTACACTTCAAGAGAGTGTAGTTGCCATGGAGGACGCTTTTTTGct  
cgagctggcgaattcc  
>CD\_NM\_001783.2:801  
CgCctGcgagtctGGtatGCCCAGGATGTGGGCAGCCTCAATTCAAGAGATTGAGGCTGCCACATCCTGGTTTTTTTGct  
cgagctggcgaattcc  
>CD\_NM\_001783.2:657  
CgCctGcgagtctGGtatGCGCTGCTGTTTCAGGAAACGATGTTCAAGAGACATCGTTTCTGAAACAGCAGCATTTTTTGct  
cgagctggcgaattcc  
>CD\_NM\_001783.2:323  
CgCctGcgagtctGGtatGAACTTCCAATGCCCGCACAAATATTCAAGAGATATTGTGCGGGCATTGGAAGTTTTTTGct  
cgagctggcgaattcc  
>CD\_NM\_001783.2:211  
CgCctGcgagtctGGtatGAACCATCTTCTCCTCTTCTGTTCAAGAGACAGGAAGAGGAGGAAGATGGTGTTTTTTGct  
cgagctggcgaattcc  
>CD\_NM\_001783.2:205  
CgCctGcgagtctGGtatGACCTGCCACCATCTTCTCCTCTTCAAGAGAGAGGAGGAAGATGGTGGCAGGCTTTTTTGct  
cgagctggcgaattcc  
>CD\_NM\_000626:560  
CgCctGcgagtctGGtatGCCGCTGAAGGATGGTATCATCATTCAAGAGATGATGATACCATCCTTCAGCGTTTTTTTGct  
cgagctggcgaattcc  
>CD\_NM\_000626:590  
CgCctGcgagtctGGtatGCCGCTGCTGATCATCCTCTTCATTCAAGAGATGAAGAGGATGATCAGCAGCGTTTTTTTGct  
cgagctggcgaattcc  
>CD\_NM\_000626:593  
CgCctGcgagtctGGtatGATGCTGATCATCCTCTTCATCATTCAAGAGATGATGAAGAGGATGATCAGCAGTTTTTTGct  
cgagctggcgaattcc  
>CD\_NM\_000626:602  
CgCctGcgagtctGGtatGCTCCTCTTCATCATCGTGCCTATTCAAGAGATAGGCACGATGATGAAGAGGATTTTTTTGct  
cgagctggcgaattcc  
>CD\_NM\_000626.1:593  
CgCctGcgagtctGGtatGCGCTGATCATCCTCTTCATCATTTCAGAGAATGATGAAGAGGATGATCAGCATTTTTTGct  
cgagctggcgaattcc  
>CD\_NM\_000626.1:582

CgCctGcgagtctGGtatGAATCCAGACGCTGCTGATCATCTTCAAGAGAGATGATCAGCAGCGTCTGGATCTTTTTGct  
cgagctggcgaattcc  
>CD\_NM\_000626.1:751  
CgCctGcgagtctGGtatGCGGTCTGTAGGTGAGCACCCAGTTCAAGAGACTGGGTGCTCACCTACAGACCATTTTTGct  
cgagctggcgaattcc  
>CD\_NM\_000626.1:458  
CgCctGcgagtctGGtatGATCAGCAGAAGTGCAACAACACTTCAAGAGAGTGTGTTGCACTTCTGCTGACTTTTTGct  
cgagctggcgaattcc  
>CD\_NM\_000626.1:408  
CgCctGcgagtctGGtatGAACCTCACCATCCAAGGCATCTTCAAGAGAGATGCCTTGGATGGTGAGGGTGTTTTTGct  
cgagctggcgaattcc  
>CD\_NM\_000626.1:618  
CgCctGcgagtctGGtatGACCTATCTTCTGCTGCTGGACTTCAAGAGAGTCCAGCAGCAGGAAGATAGGCTTTTTGct  
cgagctggcgaattcc  
>CD\_NM\_000626.1:379  
CgCctGcgagtctGGtatGCTGGAAGAGTCCAGAACGAATTTCAAGAGAATTCGTTCTGGGACTCTTCATTTTTGct  
cgagctggcgaattcc  
>CD\_NM\_000626.1:123  
CgCctGcgagtctGGtatGAAGCCACTGGATGGTGGCGTTGTTCAAGAGACAACGCCACCATCCAGTGGCTGTTTTTGct  
cgagctggcgaattcc  
>CD\_NM\_000626.1:163  
CgCctGcgagtctGGtatGAAGCCAGTACCAGCAGCCAGATTTCAAGAGAATCTGGCTGCTGGTACTGGCTCTTTTTGct  
cgagctggcgaattcc  
>CD\_NM\_000626.1:183  
CgCctGcgagtctGGtatGCTCGGAGGACCGGTACCGGAATTTCAAGAGAATTCGGTACCGGTCTCCGATTTTTGct  
cgagctggcgaattcc  
>CD\_NM\_000626.1:602  
CgCctGcgagtctGGtatGCCCTCTTCATCATCGTGCCTATTTCAAGAGAATAGGCACGATGATGAAGAGGATTTTTGct  
cgagctggcgaattcc  
>CD\_NM\_000626.1:303  
CgCctGcgagtctGGtatGATCCGGCAATGTGAGCTGGCTCTTCAAGAGAGAGCCAGCTCACATTGCCGAGTTTTGct  
cgagctggcgaattcc  
>CD\_NM\_000626.1:512  
CgCctGcgagtctGGtatGCGCGAGTCATGGGATTCAGCACTTCAAGAGAGTGTGAATCCCATGACTCGCATTTTTGct  
cgagctggcgaattcc  
>CD\_NM\_000626.1:621  
CgCctGcgagtctGGtatGCATCTTCTGCTGCTGGACAAGTTCAAGAGACTTGTCCAGCAGCAGGAAGATTTTTGct  
cgagctggcgaattcc  
>CD\_NM\_000626.1:648  
CgCctGcgagtctGGtatGAAGCAAGGCTGGCATGGAGGAATTCAAGAGATTCCTCCATGCCAGCCTTGCTGTTTTTGct  
cgagctggcgaattcc  
>CD\_NM\_000626.1:395  
CgCctGcgagtctGGtatGCCGAATCTCTCGCCACCCTCACTTCAAGAGAGTGGGGTGGCGAGAGATTCGTTTTTTGct  
cgagctggcgaattcc  
>CD\_NM\_000626.1:151  
CgCctGcgagtctGGtatGATGCTCTCAGCTGAGCCAGTACTTCAAGAGAGTACTGGCTCAGCTGAGAGCAGTTTTGct  
cgagctggcgaattcc  
>CD\_NM\_000626.1:716  
CgCctGcgagtctGGtatGCGGACATAGTGACGCTGCGGACTTCAAGAGAGTCCGCAGCGTCACTATGTCCTTTTTGct  
cgagctggcgaattcc  
>CD\_NM\_000626.1:564  
CgCctGcgagtctGGtatGAAAGGATGGTATCATCATGATCTTCAAGAGAGATCATGATGATAACCATCCTTTTTGct  
cgagctggcgaattcc  
>CD\_NM\_000626.1:588

CgCctGcgagtctGGtatGAACGCTGCTGATCATCCTCTTCTTCAAGAGAGAAGAGGATGATCAGCAGCGTCTTTTTTGct  
cgagctggcgaattcc  
>CD\_NM\_000626.1:422  
CgCctGcgagtctGGtatGCAGGCATCCGGTTTGAGGACAATTC AAGAGATTGTCCTCAAACCGGATGCCTTTTTTTGct  
cgagctggcgaattcc  
>CD\_NM\_000626.1:537  
CgCctGcgagtctGGtatGAGCACAGCTGAAGCAGAGGAAC TTCAAGAGAGTTCTCTGCTTCAGCTGTGCCTTTTTTGct  
cgagctggcgaattcc  
>CD\_NM\_000626.1:194  
CgCctGcgagtctGGtatGAGTACCGGAATCCCAAAGGTAGTTCAAGAGACTACCTTTGGGATTCCGGTACCTTTTTTGct  
cgagctggcgaattcc  
>CD\_NM\_000626.1:424  
CgCctGcgagtctGGtatGAGCATCCGGTTTGAGGACAATGTTCAAGAGACATTGTCCTCAAACCGGATGCCTTTTTTGct  
cgagctggcgaattcc  
>CD\_NM\_000626.1:591  
CgCctGcgagtctGGtatGACTGCTGATCATCCTCTTCATCTTCAAGAGAGATGAAGAGGATGATCAGCAGCTTTTTTGct  
cgagctggcgaattcc  
>CD\_NM\_000626.1:209  
CgCctGcgagtctGGtatGCAGGTAGTGCTTGTTTCGCGGATTTCAAGAGAATCCGCGAACAAGCACTACCTTTTTTTGct  
cgagctggcgaattcc  
>CD\_NM\_000626.1:190  
CgCctGcgagtctGGtatGAACCGGTACCGGAATCCCAAAGTTCAAGAGACTTTGGGATTCCGGTACCGGTCTTTTTTGct  
cgagctggcgaattcc  
>CD\_NM\_000626.1:624  
CgCctGcgagtctGGtatGATTCTGCTGCTGGACAAGGATTTCAAGAGAATCCTTGTC CAGCAGCAGGAAGTTTTTGct  
cgagctggcgaattcc  
>CD\_NM\_000626.1:507  
CgCctGcgagtctGGtatGCGAGCTGCGAGTCATGGGATTCTTCAAGAGAGAATCCCATGACTCGCAGCTCTTTTTTGct  
cgagctggcgaattcc  
>CD\_NM\_005191:628  
CgCctGcgagtctGGtatGCACCGGACCATCTTTGATATCATTCAAGAGATGATATCAAAGATGGTCCGGTTTTTTTGct  
cgagctggcgaattcc  
>CD\_NM\_005191:707  
CgCctGcgagtctGGtatGCGTGTGTTGTTCTGAAGTATGATTCAAGAGATCATACTTCAGAACAACACACTTTTTTTGct  
cgagctggcgaattcc  
>CD\_NM\_005191:630  
CgCctGcgagtctGGtatGACGGACCATCTTTGATATCACTTTCAAGAGAAGTGATATCAAAGATGGTCCGGTTTTTTGct  
cgagctggcgaattcc  
>CD\_NM\_005191.2:707  
CgCctGcgagtctGGtatGATGTGTTGTTCTGAAGTATGAATTCAAGAGATTCATACTTCAGAACAACACACTTTTTTTGct  
cgagctggcgaattcc  
>CD\_NM\_005191.2:1001  
CgCctGcgagtctGGtatGATTCATGTGTCTCATCAAGTATTTCAAGAGAATACTTGATGAGACACATGAAGTTTTTTGct  
cgagctggcgaattcc  
>CD\_NM\_005191.2:512  
CgCctGcgagtctGGtatGCGGTCACAAATGTTTCTGTTGAATTCAAGAGATTC AACAGAAACATTGTGACCATTTTTTGct  
cgagctggcgaattcc  
>CD\_NM\_005191.2:1192  
CgCctGcgagtctGGtatGCTGAGAGATTGAGAAGGGAAAGTTCAAGAGACTTCCCTTCTCAATCTCTCATTTTTTTGct  
cgagctggcgaattcc  
>CD\_NM\_005191.2:795  
CgCctGcgagtctGGtatGACTAGTATATCTGACTTTGAAATTCAAGAGATTTCAAAGTCAGATATACTAGGTTTTTTGct  
cgagctggcgaattcc  
>CD\_NM\_005191.2:1031

CgCctGcgagtctGGtatGCAGAGTGAATCAGACCTTCAACTTCAAGAGAGTTGAAGGTCTGATTCACTCTTTTTTTGct  
cgagctggcgaattcc  
>CD\_NM\_005191.2:628  
CgCctGcgagtctGGtatGCCCCGACCATCTTTGATATCACTTCAAGAGAGTGATATCAAAGATGGTCCGGTTTTTTGct  
cgagctggcgaattcc  
>CD\_NM\_005191.2:962  
CgCctGcgagtctGGtatGCAGCAGCAAACCTGGATTTCAATTTCAAGAGAATTGAAATCCAGTTTGCTGCTATTTTTGct  
cgagctggcgaattcc  
>CD\_NM\_005191.2:448  
CgCctGcgagtctGGtatGATCACTTCTGTTCAGGTGTTATTTCAAGAGAATAACACCTGAACAGAAGTGAGTTTTTTGct  
cgagctggcgaattcc  
>CD\_NM\_005191.2:1177  
CgCctGcgagtctGGtatGAAGAGAGAAGGAGGAATGAGAGTTCAAGAGACTCTCATTCCCTCCTTCTCTCTTTTTTTGct  
cgagctggcgaattcc  
>CD\_NM\_005191.2:476  
CgCctGcgagtctGGtatGAACCAAGGAAGTGAAAGAAGTGTTCAGAGACACTTCTTTCACTTCCCTGGTCTTTTTTTGct  
cgagctggcgaattcc  
>CD\_NM\_005191.2:701  
CgCctGcgagtctGGtatGCTACGAGTGTGTTGTTCTGAAGTTCAAGAGACTTCAGAACAACACACTCGTATTTTTTTGct  
cgagctggcgaattcc  
>CD\_NM\_005191.2:936  
CgCctGcgagtctGGtatGAATCCTGAAACTGAGCTCTATGTTCAAGAGACATAGAGCTCAGTTTCAGGATCTTTTTTTGct  
cgagctggcgaattcc  
>CD\_NM\_005191.2:524  
CgCctGcgagtctGGtatGCTCTGTTGAAGAGCTGGCACAATTTCAAGAGATTGTGCCAGCTCTTCAACAGAATTTTTTTGct  
cgagctggcgaattcc  
>CD\_NM\_005191.2:1090  
CgCctGcgagtctGGtatGCGCTCCCATCCTGGGCCATTACTTCAAGAGAGTAATGGCCCAGGATGGGAGCATTTTTTTGct  
cgagctggcgaattcc  
>CD\_NM\_005191.2:1011  
CgCctGcgagtctGGtatGATCATCAAGTATGGACATTTAATTTCAAGAGATTAATGTCCATACTTGATGAGTTTTTTGct  
cgagctggcgaattcc  
>CD\_NM\_005191.2:1042  
CgCctGcgagtctGGtatGCGACCTTCAACTGGAATACAACCTTCAAGAGAGTTGTATTCCAGTTGAAGGTCTTTTTTTGct  
cgagctggcgaattcc  
>CD\_NM\_005191.2:632  
CgCctGcgagtctGGtatGAACCATCTTTGATATCACTAATTTCAAGAGAATTAGTGATATCAAAGATGGTCTTTTTTTGct  
cgagctggcgaattcc  
>CD\_NM\_005191.2:807  
CgCctGcgagtctGGtatGAACTTTGAAATTTCAACTTCTATTCAAGAGATAGAAGTTGGAATTTCAAAGTCTTTTTTTGct  
cgagctggcgaattcc  
>CD\_NM\_005191.2:757  
CgCctGcgagtctGGtatGATGAAGTGACGTTATCAGTCAATTTCAAGAGATTGACTGATAACGTCACTTCAGTTTTTTGct  
cgagctggcgaattcc  
>CD\_NM\_005191.2:1209  
CgCctGcgagtctGGtatGAAAAGTGTACGCCCTGTATAACTTCAAGAGAGTTATACAGGGCGTACACTTCTTTTTTTGct  
cgagctggcgaattcc  
>CD\_NM\_005191.2:501  
CgCctGcgagtctGGtatGCCGCTGTCTGTGGTCACAATGTTCAAGAGACATTGTGACCACAGGACAGCGTTTTTTTTGct  
cgagctggcgaattcc  
>CD\_NM\_005191.2:956  
CgCctGcgagtctGGtatGCGCTGTTAGCAGCAAACCTGGATTTCAAGAGAATCCAGTTTGCTGCTAACAGCATTTTTTTGct  
cgagctggcgaattcc  
>CD\_NM\_005191.2:461

CgCctGcgagtctGGtatGCGGTGTTATCCACGTGACCAAGTTCAAGAGACTTGGTCACGTGGATAACACCTTTTTTGct  
cgagctggcgaattcc  
>CD\_NM\_005191.2:801  
CgCctGcgagtctGGtatGCTATCTGACTTTGAAATTTCAATTTCAAGAGATTGGAATTTCAAAGTCAGATATTTTTTGct  
cgagctggcgaattcc  
>CD\_NM\_005191.2:910  
CgCctGcgagtctGGtatGCTGCCATCAACACAACAGTTTCTTCAAGAGAGAAACTGTTGTGTTGATGGCATTTTTTTGct  
cgagctggcgaattcc  
>CD\_NM\_005191.2:821  
CgCctGcgagtctGGtatGCACTTCTAATATTAGAAGGATATTCAAGAGATATCCTTCTAATATTAGAAGTTTTTTTGct  
cgagctggcgaattcc  
>CD\_NM\_005191.2:630  
CgCctGcgagtctGGtatGAGGACCATCTTTGATATCACTATTCAAGAGATAGTGATATCAAAGATGGTCCGTTTTTGct  
cgagctggcgaattcc  
>CD\_NM\_005191.2:705  
CgCctGcgagtctGGtatGAAGTGTGTTGTTCTGAAGTATGTTCAAGAGACATACTTCAGAACAACACACTTTTTTGct  
cgagctggcgaattcc  
>CD\_NM\_005191.2:379  
CgCctGcgagtctGGtatGAGCAGGGAACATCACCATCCAATTTCAAGAGATTGGATGGTGATGTTCCCTGCCTTTTTTGct  
cgagctggcgaattcc  
>CD\_NM\_004356:589  
CgCctGcgagtctGGtatGCCGCCAAGGATGTGAAGCAGTTTTTCAAGAGAACTGCTTCACATCCTTGGCGATTTTTTGct  
cgagctggcgaattcc  
>CD\_NM\_004356:393  
CgCctGcgagtctGGtatGACGCCAACACCTTCTATGTAGTTCAAGAGACTACATAGAAGGTGTTGGGCGCTTTTTTGct  
cgagctggcgaattcc  
>CD\_NM\_004356:756  
CgCctGcgagtctGGtatGCGTCCCTCGGGCAGCAACATCATTCAAGAGATGATGTTGCTGCCCCGAGGGACATTTTTTGct  
cgagctggcgaattcc  
>CD\_NM\_004356.3:727  
CgCctGcgagtctGGtatGAACCACCTCAGTGCTCAAGAACTTCAAGAGAGTTCTTGAGCACTGAGGTGGTCTTTTTTGct  
cgagctggcgaattcc  
>CD\_NM\_004356.3:868  
CgCctGcgagtctGGtatGAGCTGTGATCATGATCTTCGAGTTCAAGAGACTCGAAGATCATGATCACAGCGTTTTTGct  
cgagctggcgaattcc  
>CD\_NM\_004356.3:589  
CgCctGcgagtctGGtatGAGCCAAGGATGTGAAGCAGTTCTTCAAGAGAGAACTGCTTCACATCCTTGGCGTTTTTGct  
cgagctggcgaattcc  
>CD\_NM\_004356.3:862  
CgCctGcgagtctGGtatGAGTGGTCGCTGTGATCATGATCTTCAAGAGAGATCATGATCACAGCGACCACGTTTTTGct  
cgagctggcgaattcc  
>CD\_NM\_004356.3:763  
CgCctGcgagtctGGtatGAGGCAGCAACATCATCAGCAACTTCAAGAGAGTTGCTGATGATGTTGCTGCCCTTTTTTGct  
cgagctggcgaattcc  
>CD\_NM\_004356.3:870  
CgCctGcgagtctGGtatGATGTGATCATGATCTTCGAGATTTCAAGAGAATCTCGAAGATCATGATCACAGTTTTTGct  
cgagctggcgaattcc  
>CD\_NM\_004356.3:325  
CgCctGcgagtctGGtatGAGCCCTGTGGCTCCGCCATGACTTCAAGAGAGTCATGGCGGAGCCACAGGGCCTTTTTTGct  
cgagctggcgaattcc  
>CD\_NM\_004356.3:510  
CgCctGcgagtctGGtatGAGTTCTTCACCTGCCTGGTCATTTCAAGAGAATGACCAGGCAGGTGAAGAACGTTTTTGct  
cgagctggcgaattcc  
>CD\_NM\_004356.3:723

CgCctGcgagtctGGtatGATTTGACCACCTCAGTGCTCAATTCAAGAGATTGAGCACTGAGGTGGTCAAAGTTTTTGct  
cgagctggcgaattcc  
>CD\_NM\_004356.3:826  
CgCctGcgagtctGGtatGATCCGGGAAGCTGTACCTCATCTTCAAGAGAGATGAGGTACAGCTTCCCGAGTTTTTGct  
cgagctggcgaattcc  
>CD\_NM\_004356.3:268  
CgCctGcgagtctGGtatGACTGCTCTTCGTCTTCAATTTCTTCAAGAGAGAAATTGAAGACGAAGAGCAGTTTTTGct  
cgagctggcgaattcc  
>CD\_NM\_004356.3:433  
CgCctGcgagtctGGtatGCGTGGGCGCTGTCATGATGTTCTTCAAGAGAGAACATCATGACAGCGCCACATTTTTTGct  
cgagctggcgaattcc  
>CD\_NM\_004356.3:352  
CgCctGcgagtctGGtatGAACCACCAACCTCCTGTATCTGTTCAAGAGACAGATACAGGAGGTTGGTGGTCTTTTTGct  
cgagctggcgaattcc  
>CD\_NM\_004356.3:873  
CgCctGcgagtctGGtatGCGATCATGATCTTCGAGATGATTTCAAGAGAATCATCTCGAAGATCATGATCATTTTTGct  
cgagctggcgaattcc  
>CD\_NM\_004356.3:883  
CgCctGcgagtctGGtatGATTCGAGATGATCCTGAGCATGTTCAAGAGACATGCTCAGGATCATCTCGAAGTTTTTGct  
cgagctggcgaattcc  
>CD\_NM\_004356.3:799  
CgCctGcgagtctGGtatGATGCCACCAGAAGATCGATGACTTCAAGAGAGTCATCGATCTTCTGGTGGCAGTTTTTGct  
cgagctggcgaattcc  
>CD\_NM\_004356.3:246  
CgCctGcgagtctGGtatGACTGCACCAAGTGCATCAAGTATTCAAGAGATACTTGATGCACTTGGTGCAGTTTTTGct  
cgagctggcgaattcc  
>CD\_NM\_004356.3:264  
CgCctGcgagtctGGtatGCGTACCTGCTCTTCGTCTTCAATTTCAAGAGATTGAAGACGAAGAGCAGGTACTTTTTTGct  
cgagctggcgaattcc  
>CD\_NM\_004356.3:441  
CgCctGcgagtctGGtatGATGTCATGATGTTGCTTGGCTTTTTCAAGAGAAAGCCAACGAACATCATGACAGTTTTTGct  
cgagctggcgaattcc  
>CD\_NM\_004356.3:267  
CgCctGcgagtctGGtatGCCCTGCTCTTCGTCTTCAATTTTTCAAGAGAAAATTGAAGACGAAGAGCAGTTTTTGct  
cgagctggcgaattcc  
>CD\_NM\_004356.3:853  
CgCctGcgagtctGGtatGCGCTGCCATCGTGGTGCCTGTGTTCAAGAGACACAGCGACCACGATGGCAGCATTTTTTGct  
cgagctggcgaattcc  
>CD\_NM\_004356.3:775  
CgCctGcgagtctGGtatGAATCAGCAACCTCTTCAAGGAGTTCAAGAGACTCCTTGAAGAGGTTGCTGATGTTTTTGct  
cgagctggcgaattcc  
>CD\_NM\_004356.3:756  
CgCctGcgagtctGGtatGATCCCTCGGGCAGCAACATCATTTCAAGAGAATGATGTTGCTGCCCGAGGGACTTTTTTGct  
cgagctggcgaattcc  
>CD\_NM\_004356.3:247  
CgCctGcgagtctGGtatGATGCACCAAGTGCATCAAGTACTTCAAGAGAGTACTTGATGCACTTGGTGCAGTTTTTGct  
cgagctggcgaattcc  
>CD\_NM\_004356.3:379  
CgCctGcgagtctGGtatGAGGAGACAAGCCCGCGCCAACTTCAAGAGAGTTGGGCGCGGGCTTGTCTCCTTTTTGct  
cgagctggcgaattcc  
>CD\_NM\_004356.3:706  
CgCctGcgagtctGGtatGATCCAGCACACTGACTGCTTTGTTCAAGAGACAAAGCAGTCAGTGTGCTGGAGTTTTTGct  
cgagctggcgaattcc  
>CD\_NM\_004356.3:355

CgCtGcgagtctGGtatGAACCAACCTCCTGTATCTGGAGTTCAAGAGACTCCAGATACAGGAGGTGGTGTGTTTTGct  
cgagctggcgaattcc  
>CD\_NM\_004356.3:832  
CgCtGcgagtctGGtatGAAAGCTGTACCTCATCGGCATTTTCAAGAGAAATGCCGATGAGGTACAGCTTCTTTTTGct  
cgagctggcgaattcc  
>CD\_NM\_004356.3:400  
CgCtGcgagtctGGtatGAACCTTCTATGTAGGCATCTACTTCAAGAGAGTAGATGCCTACATAGAAGGTGTTTTGct  
cgagctggcgaattcc  
>CD\_NM\_004356.3:367  
CgCtGcgagtctGGtatGATATCTGGAGCTGGGAGACAAGTTCAAGAGACTTGTCTCCAGCTCCAGATACTTTTGct  
cgagctggcgaattcc  
>CD\_NM\_002231:257  
CgCtGcgagtctGGtatGCGCCTGTATCAAAGTCACCAAATTCAGAGATTTGGTGACTTTGATACAGGCTTTTTGct  
cgagctggcgaattcc  
>CD\_NM\_002231:288  
CgCtGcgagtctGGtatGCTCCTTCAACTTGATCTTCTTTCAAGAGAAGAAGATCAAGTTGAAGAGGAATTTTTGct  
cgagctggcgaattcc  
>CD\_NM\_002231:555  
CgCtGcgagtctGGtatGAGGGCCCTTCTACTTCAACATTCAGAGATGTTGAAGTAGAAGAGGGCCCTTTTTGct  
cgagctggcgaattcc  
>CD\_NM\_002231:600  
CgCtGcgagtctGGtatGAGCGGCATCGTGACTGAGCTCATTCAAGAGATGAGCTCAGTCACGATGCCGCTTTTTGct  
cgagctggcgaattcc  
>CD\_NM\_002231:696  
CgCtGcgagtctGGtatGCGCGGCTGGGTCAGCTTCTACATTCAGAGATGTAGAAGCTGACCCAGCCGCATTTTTGct  
cgagctggcgaattcc  
>CD\_NM\_002231:801  
CgCtGcgagtctGGtatGCGCCTTCTGTGAGGAAGGGCTTTCAAGAGAAGCCCTTCTCACAGAAAGGCTTTTTGct  
cgagctggcgaattcc  
>CD\_NM\_002231.3:282  
CgCtGcgagtctGGtatGCTCCTTCTTCAACTTGATTTCAAGAGAATCAAGTTGAAGAGGAAGAGAATTTTTGct  
cgagctggcgaattcc  
>CD\_NM\_002231.3:259  
CgCtGcgagtctGGtatGATGTATCAAAGTCACCAAATACTTCAAGAGAGTATTTGGTGACTTTGATACAGTTTTGct  
cgagctggcgaattcc  
>CD\_NM\_002231.3:664  
CgCtGcgagtctGGtatGATGGGACTACGTGCAGGCTCAGTTCAAGAGACTGAGCCTGCACGTAGTCCCAGTTTTGct  
cgagctggcgaattcc  
>CD\_NM\_002231.3:276  
CgCtGcgagtctGGtatGCATACTTCTCTTCTTCAATTCAAGAGATTGAAGAGGAAGAGAAAGTATTTTTGct  
cgagctggcgaattcc  
>CD\_NM\_002231.3:523  
CgCtGcgagtctGGtatGACTCCTGATCCTCATTGCCAGTTCAAGAGACTGGGCAATGAGGATCAGGAGCTTTTTGct  
cgagctggcgaattcc  
>CD\_NM\_002231.3:696  
CgCtGcgagtctGGtatGACGGCTGGGTCAGCTTCTACAATTCAAGAGATTGTAGAAGCTGACCCAGCCGCTTTTTGct  
cgagctggcgaattcc  
>CD\_NM\_002231.3:591  
CgCtGcgagtctGGtatGCGGAGATGGGCGGCATCGTGACTTCAAGAGAGTCACGATGCCGCCATCTCTTTTTGct  
cgagctggcgaattcc  
>CD\_NM\_002231.3:288  
CgCtGcgagtctGGtatGCCCTTCAACTTGATCTTCTTTTCAAGAGAAAGAAGATCAAGTTGAAGAGGATTTTTGct  
cgagctggcgaattcc  
>CD\_NM\_002231.3:1003

CgCctGcgagtctGGtatGATGCCGGCACGTCCATTCCGAATTCAAGAGATTCGGAATGGACGTGCCGGCACTTTTTGct  
cgagctggcgaattcc  
>CD\_NM\_002231.3:607  
CgCctGcgagtctGGtatGAGTGACTGAGCTCATTCGAGACTTCAAGAGAGTCTCGAATGAGCTCAGTCACGTTTTTGct  
cgagctggcgaattcc  
>CD\_NM\_002231.3:694  
CgCctGcgagtctGGtatGATGCGGCTGGGTCTACTTCAAGAGAGTAGAAGCTGACCCAGCCGAGTTTTTGct  
cgagctggcgaattcc  
>CD\_NM\_002231.3:681  
CgCctGcgagtctGGtatGATCAGGTGAAGTGTGCGGCTGTTCAAGAGACAGCCGAGCACTTCACCTGAGTTTTTGct  
cgagctggcgaattcc  
>CD\_NM\_002231.3:574  
CgCctGcgagtctGGtatGAATGGGCAAGCTGAAGCAGGAGTTCAAGAGACTCCTGCTTCAGCTTGCCCATGTTTTTGct  
cgagctggcgaattcc  
>CD\_NM\_002231.3:280  
CgCctGcgagtctGGtatGATTTCTCTTCTTCAACTTGTTCAGAGACAAGTTGAAGAGGAAGAGAAAGTTTTTGct  
cgagctggcgaattcc  
>CD\_NM\_002231.3:1004  
CgCctGcgagtctGGtatGCGCCGGCACGTCCATTCCGAAGTTCAAGAGACTTCGGAATGGACGTGCCGGCATTTTTTGct  
cgagctggcgaattcc  
>CD\_NM\_002231.3:555  
CgCctGcgagtctGGtatGAGGCCCTCTTCAACTTCAAGAGAAATGTTGAAGTAGAAGAGGGCCTTTTTGct  
cgagctggcgaattcc  
>CD\_NM\_002231.3:702  
CgCctGcgagtctGGtatGAGGTCAGCTTCTACAAGTCAAGAGAGTCCAGTTGTAGAAGCTGACCCTTTTTGct  
cgagctggcgaattcc  
>CD\_NM\_002231.3:248  
CgCctGcgagtctGGtatGCTGGGCTCAGCCTGTATCAAAGTTCAAGAGACTTTGATACAGGCTGAGCCCATTTTTTGct  
cgagctggcgaattcc  
>CD\_NM\_002231.3:511  
CgCctGcgagtctGGtatGATTTGCTTCTCTGCTCCTGATCTTCAAGAGAGATCAGGAGCAGGAAAGCAAAGTTTTTGct  
cgagctggcgaattcc  
>CD\_NM\_002231.3:612  
CgCctGcgagtctGGtatGATGAGCTCATTCGAGACTACAATTCAAGAGATTGTAGTCTCGAATGAGCTCAGTTTTTGct  
cgagctggcgaattcc  
>CD\_NM\_002231.3:949  
CgCctGcgagtctGGtatGAGGCGTGGGTGTGGCCATCATCTTCAAGAGAGATGATGGCCACACCCACGCCTTTTTGct  
cgagctggcgaattcc  
>CD\_NM\_002231.3:567  
CgCctGcgagtctGGtatGCCTTCAACATGGGCAAGCTGAATTCAAGAGATTCAGCTTGCCCATGTTGAAGTTTTTGct  
cgagctggcgaattcc  
>CD\_NM\_002231.3:882  
CgCctGcgagtctGGtatGCCAGGAGGGCTGCATGGAGAATTCAAGAGATTCTCCATGCAGCCCTCCTGGTTTTTGct  
cgagctggcgaattcc  
>CD\_NM\_002231.3:517  
CgCctGcgagtctGGtatGCTTCTGCTCCTGATCCTCATTTCAGAGAAATGAGGATCAGGAGCAGGAAATTTTTGct  
cgagctggcgaattcc  
>CD\_NM\_002231.3:862  
CgCctGcgagtctGGtatGACCTGAGGACTGGCCTGTGTACTTCAAGAGAGTACACAGGCCAGTCTCAGGGTTTTTGct  
cgagctggcgaattcc  
>CD\_NM\_002231.3:610  
CgCctGcgagtctGGtatGAACTGAGCTCATTCGAGACTACTTCAAGAGAGTAGTCTCGAATGAGCTCAGTTTTTGct  
cgagctggcgaattcc  
>CD\_NM\_002231.3:289



CgCctGcgagtctGGtatGACTCTTCAACTTGATCTTCTTTTTCAAGAGAAAAGAAGATCAAGTTGAAGAGGTTTTTGct  
cgagctggcgaattcc  
>CD\_NM\_004233:747  
CgCctGcgagtctGGtatGATCCTGCTGCTGGCTCTGGTTATTCAAGAGATAACCAGAGCCAGCAGCAGGACTTTTTTGct  
cgagctggcgaattcc  
>CD\_NM\_004233.2:441  
CgCctGcgagtctGGtatGACTACACGGTCTCCTGGGTCAATTCAAGAGATTGACCCAGGAGACCGTGTAGTTTTTGct  
cgagctggcgaattcc  
>CD\_NM\_004233.2:813  
CgCctGcgagtctGGtatGCACAGAGTATCTTCCCAGATTTTTCAAGAGAAAATCTGGGAAGATACTCTGTATTTTTTGct  
cgagctggcgaattcc  
>CD\_NM\_004233.2:811  
CgCctGcgagtctGGtatGACTACAGAGTATCTTCCCAGATTTCAAGAGAATCTGGGAAGATACTCTGTAGCTTTTTTGct  
cgagctggcgaattcc  
>CD\_NM\_004233.2:582  
CgCctGcgagtctGGtatGACCTGAAGATCCGAAACTACTTCAAGAGAGTAGTGTTCGGATCTCAGGGTTTTTGct  
cgagctggcgaattcc  
>CD\_NM\_004233.2:695  
CgCctGcgagtctGGtatGCGCCCTGCACAGCGTAAAGAAGTTCAAGAGACTTCTTTACGCTGTGCAGGGCATTTTTTGct  
cgagctggcgaattcc  
>CD\_NM\_004233.2:736  
CgCctGcgagtctGGtatGCGCGGAGATTGTCCTGCTGCTGTTCAAGAGACAGCAGCAGGACAATCTCCGCTTTTTTGct  
cgagctggcgaattcc  
>CD\_NM\_004233.2:333  
CgCctGcgagtctGGtatGCGCTCCTGAGCTGCGCCTACAGTTCAAGAGACTGTAGGCGCAGCTCAGGAGCATTTTTTGct  
cgagctggcgaattcc  
>CD\_NM\_004233.2:747  
CgCctGcgagtctGGtatGCCCTGCTGCTGGCTCTGGTTATTTCAAGAGAATAACCAGAGCCAGCAGCAGGATTTTTTGct  
cgagctggcgaattcc  
>CD\_NM\_004233.2:794  
CgCctGcgagtctGGtatGCCTTGTAAGTTTGCACGGCTACTTCAAGAGAGTAGCCGTGCAAACCTACAAGTTTTTTGct  
cgagctggcgaattcc  
>CD\_NM\_004233.2:651  
CgCctGcgagtctGGtatGAGCAGAGAAACCTAAGTGGCAATTCAAGAGATTGCCACTTAGGTTTCTCTGCCTTTTTTGct  
cgagctggcgaattcc  
>CD\_NM\_004233.2:571  
CgCctGcgagtctGGtatGCAGGCCCTATTCCCTGAAGATCTTCAAGAGAGATCTTCAGGGAATAGGGCCTTTTTTTGct  
cgagctggcgaattcc  
>CD\_NM\_004233.2:461  
CgCctGcgagtctGGtatGCAGTTATTGGAGGGTGGTGAAGTTCAAGAGACTTCACCACCCTCCAATAACTTTTTTTGct  
cgagctggcgaattcc  
>CD\_NM\_004233.2:645  
CgCctGcgagtctGGtatGAGGATGGGCAGAGAAACCTAAGTTCAAGAGACTTAGGTTTCTCTGCCCATCCGTTTTTTGct  
cgagctggcgaattcc  
>CD\_NM\_004233.2:640  
CgCctGcgagtctGGtatGAGACCCGGATGGGCAGAGAACTTCAAGAGAGTTTCTCTGCCCATCCGGTCTTTTTTGct  
cgagctggcgaattcc  
>CD\_NM\_004233.2:592  
CgCctGcgagtctGGtatGACGAAACTACCAGCTGCAACTTCAAGAGAGTTGCAGCTGGTAGTGTTCGGTTTTTTGct  
cgagctggcgaattcc  
>CD\_NM\_004233.2:517  
CgCctGcgagtctGGtatGAGGACAGCACTATCATCAGAAGTTCAAGAGACTTCTGATGATAGTGCTGTCCTTTTTTGct  
cgagctggcgaattcc  
>CD\_NM\_004233.2:669

CgCctGcgagtctGGtatGACAAGGTGATCTTGAGAGTGACTTCAAGAGAGTCACTCTCAAGATCACCTTGCTTTTTTGct  
cgagctggcgaattcc  
>CD\_NM\_004233.2:446  
CgCctGcgagtctGGtatGCCGGTCTCCTGGGTCAAGTTATTTCAAGAGAATAACTTGACCCAGGAGACCGTTTTTTGct  
cgagctggcgaattcc  
>CD\_NM\_004233.2:319  
CgCctGcgagtctGGtatGAGGCCTCCAGCTTCTGCTCCTGTTCAAGAGACAGGAGCAGAAGCTGGAGGCCGTTTTTTGct  
cgagctggcgaattcc  
>CD\_NM\_004233.2:742  
CgCctGcgagtctGGtatGAATTGTCTGCTGCTGGCTCTGTTCAAGAGACAGAGCCAGCAGCAGGACAATCTTTTTGct  
cgagctggcgaattcc  
>CD\_NM\_004233.2:448  
CgCctGcgagtctGGtatGAGTCTCCTGGGTCAAGTTATTGTTCAAGAGACAATAACTTGACCCAGGAGACCTTTTTGct  
cgagctggcgaattcc  
>CD\_NM\_004233.2:889  
CgCctGcgagtctGGtatGCTTAGGGCTAGTGACTCCTCACTTCAAGAGAGTGAGGAGTCACTAGCCCTAAATTTTTGct  
cgagctggcgaattcc  
>CD\_NM\_004233.2:447  
CgCctGcgagtctGGtatGAGGTCTCCTGGGTCAAGTTATTTTCAAGAGAAATAACTTGACCCAGGAGACCGTTTTTTGct  
cgagctggcgaattcc  
>CD\_NM\_004233.2:664  
CgCctGcgagtctGGtatGCAGTGGCAAGGTGATCTTGAGATTCAAGAGATCTCAAGATCACCTTGCCACTTTTTTTGct  
cgagctggcgaattcc  
>CD\_NM\_004233.2:725  
CgCctGcgagtctGGtatGCAGAAATACAGAGCGGAGATTGTTCAAGAGACAATCTCCGCTCTGTATTTCTTTTTTTGct  
cgagctggcgaattcc  
>CD\_NM\_004233.2:694  
CgCctGcgagtctGGtatGCTGCCCTGCACAGCGTAAAGAATTCAAGAGATTCTTTACGCTGTGCAGGGCATTTTTTGct  
cgagctggcgaattcc  
>CD\_NM\_004233.2:377  
CgCctGcgagtctGGtatGATGAAGGTGGCTTGCTCCGAAGTTCAAGAGACTTCGGAGCAAGCCACCTTCACTTTTTGct  
cgagctggcgaattcc  
>CD\_NM\_004233.2:472  
CgCctGcgagtctGGtatGAGGTGGTGAAGAGAGGATGGAGTTCAAGAGACTCCATCCTCTTTCACCACCCTTTTTGct  
cgagctggcgaattcc  
>CD\_NM\_004233.2:567  
CgCctGcgagtctGGtatGCTGAAAGGCCCTATTCCCTGAATTCAAGAGATTCAAGGAATAGGGCCTTTCATTTTTTTGct  
cgagctggcgaattcc  
>CD\_NM\_004233.2:445  
CgCctGcgagtctGGtatGAACGGTCTCCTGGGTCAAGTTATTCAAGAGATAACTTGACCCAGGAGACCGTGTTTTTGct  
cgagctggcgaattcc  
>CD\_NM\_004233.2:697  
CgCctGcgagtctGGtatGACCTGCACAGCGTAAAGAAGAGTTCAAGAGACTTCTTTTACGCTGTGCAGGGTTTTTTGct  
cgagctggcgaattcc  
>CD\_NM\_004233.2:667  
CgCctGcgagtctGGtatGCGGCAAGGTGATCTTGAGAGTGTTCAGAGACACTCTCAAGATCACCTTGCCATTTTTGct  
cgagctggcgaattcc  
>CD\_NM\_003874:409  
CgCctGcgagtctGGtatGCGCGCTACAACCTGCAAATCTATTCAAGAGATAGATTTGCAGGTTGTAGCGCTTTTTTTGct  
cgagctggcgaattcc  
>CD\_NM\_003874.1:500  
CgCctGcgagtctGGtatGATGACATGCTCTGTAGAGAAAGTTCAAGAGACTTCTCTACAGAGCATGTCAGTTTTTTGct  
cgagctggcgaattcc  
>CD\_NM\_003874.1:148

CgCctGcgagtctGGtatGATCAGTCACTTTCCTGTAAATTTCAAGAGAATTTACAGGGAAAGTACTGACTTTTTTGct  
cgagctggcgaattcc  
>CD\_NM\_003874.1:409  
CgCctGcgagtctGGtatGACGCTACAACCTGCAAATCTATTTCAAGAGAATAGATTTGCAGGTTGTAGCGTTTTTGct  
cgagctggcgaattcc  
>CD\_NM\_003874.1:753  
CgCctGcgagtctGGtatGCTCTCATTCTGTCTTCAGTGTTTTTCAAGAGAACTGAAGACAGAATGAGAATTTTTTGct  
cgagctggcgaattcc  
>CD\_NM\_003874.1:265  
CgCctGcgagtctGGtatGCACTGTGACCCACAGAAATTATTTCAAGAGAATAATTTCTGTGGGTCACAGTATTTTTGct  
cgagctggcgaattcc  
>CD\_NM\_003874.1:777  
CgCctGcgagtctGGtatGCGTTCCGTTTGTTCAGAGAAGTTCAAGAGACTTCTCTTGAACAAACGGAACATTTTTGct  
cgagctggcgaattcc  
>CD\_NM\_003874.1:498  
CgCctGcgagtctGGtatGAACTGACATGCTCTGTAGAGAATTCAAGAGATTCTCTACAGAGCATGTCAGTGTTTTTGct  
cgagctggcgaattcc  
>CD\_NM\_003874.1:150  
CgCctGcgagtctGGtatGAAGTCACTTTCCTGTAAATTTCAAGAGAATTTACAGGGAAAGTACTGTTTTTGct  
cgagctggcgaattcc  
>CD\_NM\_003874.1:867  
CgCctGcgagtctGGtatGCGTCCAGAATCTATGATGAAATTTCAAGAGAATTTATCATAGATTCTGGACTTTTTTGct  
cgagctggcgaattcc  
>CD\_NM\_003874.1:242  
CgCctGcgagtctGGtatGAACTCAGAAACAGCACCCGTAGTTCAAGAGACTACGGGTGCTGTTTCTGAGTCTTTTTGct  
cgagctggcgaattcc  
>CD\_NM\_003874.1:931  
CgCctGcgagtctGGtatGAACAGTTTATCCGAAGTGCAGTTCAAGAGACTGCACTTCGGAATAAACTGTGTTTTTGct  
cgagctggcgaattcc  
>CD\_NM\_003874.1:562  
CgCctGcgagtctGGtatGCGAGGGTAATGTCCTTCAAATCTTCAAGAGAGATTTGAAGGACATTACCTCTTTTTTGct  
cgagctggcgaattcc  
>CD\_NM\_003874.1:718  
CgCctGcgagtctGGtatGATTGCTGAGCGTGTGGCTATGTTCAAGAGACATAGCCAGCACGCTCAGCAACTTTTTGct  
cgagctggcgaattcc  
>CD\_NM\_003874.1:625  
CgCctGcgagtctGGtatGCGCCCAGAACCCTGTCAGCAACTTCAAGAGAGTTGCTGACAGGGTCTGGGCTTTTTTGct  
cgagctggcgaattcc  
>CD\_NM\_003874.1:472  
CgCctGcgagtctGGtatGCTCTGTGAACAGCACCTGTAATTTCAAGAGAATTACAGGTGCTGTTACAGATTTTTTGct  
cgagctggcgaattcc  
>CD\_NM\_003874.1:66  
CgCctGcgagtctGGtatGCCTTGCTCCTTTGCCTGCAAACCTTCAAGAGAGTTTGCAGGCAAAGGAGCAAGATTTTTGct  
cgagctggcgaattcc  
>CD\_NM\_003874.1:1001  
CgCctGcgagtctGGtatGAGGACTTCAAGCTATGAAATTGTTCAAGAGACAATTTATAGCTTGAAGTCCCTTTTTGct  
cgagctggcgaattcc  
>CD\_NM\_003874.1:986  
CgCctGcgagtctGGtatGAACTGAAACCTCCTGGGACTTTTTCAAGAGAAAGTCCCAGGAGGTTTACTGTCTTTTTGct  
cgagctggcgaattcc  
>CD\_NM\_003874.1:999  
CgCctGcgagtctGGtatGATGGGACTTCAAGCTATGAAATTTCAAGAGAATTTATAGCTTGAAGTCCCAGTTTTTGct  
cgagctggcgaattcc  
>CD\_NM\_003874.1:1009

CgCctGcgagtctGGtatGCAGCTATGAAATTGTGATCTAGTTCAAGAGACTAGATCACAATTTTCATAGCTTTTTTTGct  
cgagctggcgaattcc  
>CD\_NM\_003874.1:424  
CgCctGcgagtctGGtatGCATCTATCGTCGGCTTGGGAAATTTCAAGAGATTTCCCAAGCCGACGATAGATTTTTTTGct  
cgagctggcgaattcc  
>CD\_NM\_003874.1:46  
CgCctGcgagtctGGtatGAGCTCAGCACCACCTATGGATCTTCAAGAGAGATCCATAGGTGGTGTGAGCCTTTTTGct  
cgagctggcgaattcc  
>CD\_NM\_003874.1:112  
CgCctGcgagtctGGtatGATCAGAAATCTTCACAGTGAATTTCAAGAGAATTCCTGTGAAGATTTCTGAGTTTTTTGct  
cgagctggcgaattcc  
>CD\_NM\_003874.1:452  
CgCctGcgagtctGGtatGCTTACACAGAGTTTAATGGCATTTCAGAGAATGCCATTAAACTCTGTGTAATTTTTTTGct  
cgagctggcgaattcc  
>CD\_NM\_003874.1:794  
CgCctGcgagtctGGtatGCGAAGACAAGATGCTGCCTCAATTCAAGAGATTGAGGCAGCATCTTGTCTTCTTTTTTTGct  
cgagctggcgaattcc  
>CD\_NM\_003874.1:146  
CgCctGcgagtctGGtatGAAGTCAGTCACTTTCCCTGTAATTTCAAGAGATTACAGGGAAAGTGACTGACTCTTTTTTTGct  
cgagctggcgaattcc  
>CD\_NM\_003874.1:477  
CgCctGcgagtctGGtatGCGAACAGCACCTGTAATGTCACTTCAAGAGAGTGACATTACAGGTGCTGTTCATTTTTTGct  
cgagctggcgaattcc  
>CD\_NM\_003874.1:138  
CgCctGcgagtctGGtatGCTCTGGGAGAGTCAGTCACTTTTTTCAAGAGAAAAGTGACTGACTCTCCAGAAATTTTTTTGct  
cgagctggcgaattcc  
>CD\_NM\_003874.1:267  
CgCctGcgagtctGGtatGATGTGACCCACAGAAATTATTATTCAAGAGATAATAATTTCTGTGGGTCACAGTTTTTTGct  
cgagctggcgaattcc  
>CD\_NM\_003874.1:664  
CgCctGcgagtctGGtatGCGCCCGGCAGCTCTGTGCAGACTTCAAGAGAGTCTGCACAGAGCTGCCGGGCATTTTTTTGct  
cgagctggcgaattcc  
>CD\_NM\_003874.1:684  
CgCctGcgagtctGGtatGCCATCGCAATGGGCTTCCGTACTTCAAGAGAGTACGGAAGCCCATTGCGATGTTTTTTGct  
cgagctggcgaattcc  
>CD\_NM\_003874.1:634  
CgCctGcgagtctGGtatGACCTGTCAGCAACAATTTCTGACTTCAAGAGAGTCAGAATTGTTGCTGACAGGGTTTTTTGct  
cgagctggcgaattcc  
>CD\_NM\_006669:620  
CgCctGcgagtctGGtatGAGGCGGTATCGCTGTTACTATGTTCAAGAGACATAGTAACAGCGATAACGCCCTTTTTTTGct  
cgagctggcgaattcc  
>CD\_NM\_006669:689  
CgCctGcgagtctGGtatGATGGTGACAGGAGCCTACATCATTCAAGAGATGATGTAGGCTCCTGTCAACACTTTTTTTGct  
cgagctggcgaattcc  
>CD\_NM\_006669:2186  
CgCctGcgagtctGGtatGAAGCTGCACAGCTTGACCCTTATTCAAGAGATAAGGGTCAAGCTGTGCAGCTGTTTTTTGct  
cgagctggcgaattcc  
>CD\_NM\_006669.2:558  
CgCctGcgagtctGGtatGACCACAGGAGCTTGTGAAGAAGTTCAAGAGACTTCTTCAAGCTCCTGTGGGTTTTTTGct  
cgagctggcgaattcc  
>CD\_NM\_006669.2:1825  
CgCctGcgagtctGGtatGAAGAGAAAGGCTGATTTCCAACCTTCAAGAGAGTTGGAAATCAGCCTTTCTCTGTTTTTTGct  
cgagctggcgaattcc  
>CD\_NM\_006669.2:441

CgCctGcgagtctGGtatGCCAGGCTCTGTGATCACCCAGTTCAAGAGACTGGGTGATCACAGAGCCTGGTTTTTTGct  
cgagctggcgaattcc  
>CD\_NM\_006669.2:1432  
CgCctGcgagtctGGtatGAACCCATGGCGTCTAAGATCAATTCAAGAGATTGATCTTAGACGCCATGGGTCTTTTTTGct  
cgagctggcgaattcc  
>CD\_NM\_006669.2:2137  
CgCctGcgagtctGGtatGAACACTGAGGCTGCTGCATCTGTTCAAGAGACAGATGCAGCAGCCTCAGTGTCTTTTTTGct  
cgagctggcgaattcc  
>CD\_NM\_006669.2:468  
CgCctGcgagtctGGtatGCCCTGTGACCCCTCAGGTGTCAGTTCAAGAGACTGACACCTGAGGGTCACAGGATTTTTTGct  
cgagctggcgaattcc  
>CD\_NM\_006669.2:2030  
CgCctGcgagtctGGtatGCGGTGAAACACTCCAGACCTAGTTCAAGAGACTAGGTCTGGAGTGTTTCACCTTTTTTGct  
cgagctggcgaattcc  
>CD\_NM\_006669.2:1370  
CgCctGcgagtctGGtatGCGCTGTGTCAGTCACAGGGATGTTCAAGAGACATCCCTGTGACTGACACAGCATTTTTTGct  
cgagctggcgaattcc  
>CD\_NM\_006669.2:1098  
CgCctGcgagtctGGtatGAAGATTTGTTCTGTATAAGGACTTCAAGAGAGTCCTTATACAGAACAAATCTGTTTTTGct  
cgagctggcgaattcc  
>CD\_NM\_006669.2:424  
CgCctGcgagtctGGtatGACCACCCCTCTGGGCTGAACCAGTTCAAGAGACTGGTTCAGCCCAGAGGGTGGTTTTTTGct  
cgagctggcgaattcc  
>CD\_NM\_006669.2:689  
CgCctGcgagtctGGtatGCGGTGACAGGAGCCTACATCAATTCAAGAGATTGATGTAGGCTCCTGTCACCATTTTTTGct  
cgagctggcgaattcc  
>CD\_NM\_006669.2:1536  
CgCctGcgagtctGGtatGATCACAGAGCTCCAAACCCTACTTCAAGAGAGTAGGGTTTGGAGCTCTGTGAGTTTTTGct  
cgagctggcgaattcc  
>CD\_NM\_006669.2:1236  
CgCctGcgagtctGGtatGCGCACACAACCTCTCCTCCGAGTTCAAGAGACTCGGAGGAGAGGTTGTGTGCATTTTTTGct  
cgagctggcgaattcc  
>CD\_NM\_006669.2:1808  
CgCctGcgagtctGGtatGCACACTGGACATCGACCCAGAGTTCAAGAGACTCTGGGTCGATGTCCAGTGTTTTTTTGct  
cgagctggcgaattcc  
>CD\_NM\_006669.2:1908  
CgCctGcgagtctGGtatGCGCTGCCGATGCCAGGAAGAATTCAAGAGATTCTTCCTGGGCATCGGCAGCTTTTTTTGct  
cgagctggcgaattcc  
>CD\_NM\_006669.2:1548  
CgCctGcgagtctGGtatGAAAACCTACCTGCTGACTCACTTCAAGAGAGTGAGTCAGCAGGTAGGGTTTGTTTTTTGct  
cgagctggcgaattcc  
>CD\_NM\_006669.2:1238  
CgCctGcgagtctGGtatGAACACAACCTCTCCTCCGAGTGTTCAAGAGACACTCGGAGGAGAGGTTGTGTGTTTTTTGct  
cgagctggcgaattcc  
>CD\_NM\_006669.2:1166  
CgCctGcgagtctGGtatGAGCTCTCCCAGGCCAACTTCACTTCAAGAGAGTGAAGTTGGCCTGGGAGAGCCTTTTTTGct  
cgagctggcgaattcc  
>CD\_NM\_006669.2:737  
CgCctGcgagtctGGtatGACGTGGTGAACCTCAGGAGGAATTCAAGAGATTCCCTCCTGAGTTCACCACGGTTTTTTGct  
cgagctggcgaattcc  
>CD\_NM\_006669.2:691  
CgCctGcgagtctGGtatGATGACAGGAGCCTACATCAAACCTTCAAGAGAGTTTGTGATGTAGGCTCCTGTCACTTTTTTGct  
cgagctggcgaattcc  
>CD\_NM\_006669.2:1292

CgCtGcgagtctGGtatGCCGACAGTTCATGACAGTTCAAGAGACTGTCATAGAAGTCTCTGCGATTTTTGct  
cgagctggcgaattcc  
>CD\_NM\_006669.2:795  
CgCtGcgagtctGGtatGCGGCTTCATTCTGTGTAAGGAATTCAGAGATTCCTTACACAGAATGAAGCATTTTTTGct  
cgagctggcgaattcc  
>CD\_NM\_006669.2:505  
CgCtGcgagtctGGtatGAAGGAGTACCGTCTATATAGAGTTCAAGAGACTCTATATAGACGGTACTCCTGTTTTTGct  
cgagctggcgaattcc  
>CD\_NM\_006669.2:831  
CgCtGcgagtctGGtatGACCACAATGCCTGAACTCCCAGTTCAAGAGACTGGGAGTTCAGGCATTGTGGTTTTTGct  
cgagctggcgaattcc  
>CD\_NM\_006669.2:946  
CgCtGcgagtctGGtatGCACTCTCCCTATGAGTGGTCTCTTCAAGAGAGAGACCACTCATAGGGAGAGTTTTTTGct  
cgagctggcgaattcc  
>CD\_NM\_006669.2:1763  
CgCtGcgagtctGGtatGCCCTCCTCCTCCTCCTCATTTCAGAGAATGAGGAAGAGGAGGAGGAGGATTTTTGct  
cgagctggcgaattcc  
>CD\_NM\_006669.2:1359  
CgCtGcgagtctGGtatGAAACGTGACCCTGCTGTGTCAGTTCAAGAGACTGACACAGCAGGGTCACGTTCTTTTTGct  
cgagctggcgaattcc  
>CD\_NM\_006669.2:2193  
CgCtGcgagtctGGtatGAAGCTTGACCCTTAGACGGAAGTTCAAGAGACTTCCGTCTAAGGGTCAAGCTTTTTTGct  
cgagctggcgaattcc  
>CD\_NM\_006669.2:1353  
CgCtGcgagtctGGtatGCGGAGAGAACGTGACCCTGCTGTTCAAGAGACAGCAGGGTACGTTCTCTCTTTTTTGct  
cgagctggcgaattcc  
>CD\_NM\_006669.2:618  
CgCtGcgagtctGGtatGCGGGCGGTATCGCTGTTACTATTTCAAGAGAATAGTAACAGCGATAACGCCCTTTTTTGct  
cgagctggcgaattcc  
>CD\_NM\_006889:936  
CgCtGcgagtctGGtatGCAGCGCCTCGCAACTCTTATATTCAAGAGATATAAGAGTTGCGAGGCCGTTTTTTGct  
cgagctggcgaattcc  
>CD\_NM\_006889:187  
CgCtGcgagtctGGtatGATCCTCTGAAGATTCAGCTTATTCAAGAGATAAGCTTGAATCTTCAGAGGAGTTTTTGct  
cgagctggcgaattcc  
>CD\_NM\_006889:758  
CgCtGcgagtctGGtatGAACCATCTTCTGTATTCTGGAATTCAGAGATTCAGAAATACAGAAGATGGTCTTTTTGct  
cgagctggcgaattcc  
>CD\_NM\_175862.2:521  
CgCtGcgagtctGGtatGCTCAGTCAACCTGAAATAGTACTTCAAGAGAGTACTATTTTCAGGTTGACTGAATTTTTGct  
cgagctggcgaattcc  
>CD\_NM\_175862.2:902  
CgCtGcgagtctGGtatGCTCTGTCTAATTCATGGAAATTTCAAGAGAATTTCCATAGAATTAGACAGAATTTTTGct  
cgagctggcgaattcc  
>CD\_NM\_175862.2:403  
CgCtGcgagtctGGtatGCCTTCAAACTTCAGATCAAGTTCAAGAGACTTGATCTGAAGATTGTGAAGTTTTTTGct  
cgagctggcgaattcc  
>CD\_NM\_175862.2:187  
CgCtGcgagtctGGtatGCCCTCTGAAGATTCAAGCTTATTTCAGAGAATAAGCTTGAATCTTCAGAGGATTTTTGct  
cgagctggcgaattcc  
>CD\_NM\_175862.2:181  
CgCtGcgagtctGGtatGCGCTGCTCCTCTGAAGATTCAATTCAGAGATTGAATCTTCAGAGGAGCAGCATTTTTTGct  
cgagctggcgaattcc  
>CD\_NM\_175862.2:337

CgCctGcgagtctGGtatGCTTTGACAGTGTTCAATCCAAGTTCAAGAGACTTGGAAATGAACACTGTCAAATTTTTTgct  
cgagctggcgaattcc  
>CD\_NM\_175862.2:499  
CgCctGcgagtctGGtatGCGAACTGTCAGTGCTTGCTAACTTCAAGAGAGTTAGCAAGCACTGACAGTTCATTTTTGct  
cgagctggcgaattcc  
>CD\_NM\_175862.2:906  
CgCctGcgagtctGGtatGATCTAATTCATGAAATGGAATTCAGAGATTCATTTCCATAGAATTAGACTTTTTGct  
cgagctggcgaattcc  
>CD\_NM\_175862.2:142  
CgCctGcgagtctGGtatGAAGTAACATTCCTTTGTGATGTTCAAGAGACATCACAAAGAGAATGTTACTCTTTTTGct  
cgagctggcgaattcc  
>CD\_NM\_175862.2:194  
CgCctGcgagtctGGtatGCAGATTCAAGCTTATTTCAATGTTCAAGAGACATTGAAATAAGCTTGAATCTTTTTTgct  
cgagctggcgaattcc  
>CD\_NM\_175862.2:148  
CgCctGcgagtctGGtatGAATTCCTTTGTGATGGCCTTCTTCAAGAGAGAAGGCCATCACAAAGAGAATGTTTTTgct  
cgagctggcgaattcc  
>CD\_NM\_175862.2:939  
CgCctGcgagtctGGtatGAGCCTCGCAACTCTTATAAATGTTCAAGAGACATTTATAAGAGTTGCGAGCCTTTTTGct  
cgagctggcgaattcc  
>CD\_NM\_175862.2:531  
CgCctGcgagtctGGtatGATGAAATAGTACCAATTTCTAATTCAGAGATTAGAAATTTGGTACTATTTTCAGTTTTTgct  
cgagctggcgaattcc  
>CD\_NM\_175862.2:912  
CgCctGcgagtctGGtatGCTCTATGGAAAATGGAAGAAGAATTCAGAGATTCCTTCTCCATTTCCATAGAATTTTTGct  
cgagctggcgaattcc  
>CD\_NM\_175862.2:259  
CgCctGcgagtctGGtatGCAGCCTGAGTGAGCTAGTAGTATTCAAGAGATACTACTAGCTCACTCAGGCTTTTTTgct  
cgagctggcgaattcc  
>CD\_NM\_175862.2:126  
CgCctGcgagtctGGtatGCGTGCCTATGGGACTGAGTAATTCAGAGATTACTCAGTCCCATAGTGCATTTTTTgct  
cgagctggcgaattcc  
>CD\_NM\_175862.2:650  
CgCctGcgagtctGGtatGCCTATCGAGTATGATGGTATTATTCAAGAGATAATACCATCATACTCGATAGTTTTTgct  
cgagctggcgaattcc  
>CD\_NM\_175862.2:343  
CgCctGcgagtctGGtatGAAGTGTTCAATCCAAGTATATGTTCAAGAGACATATACTTGGAAATGAACACTGTTTTTgct  
cgagctggcgaattcc  
>CD\_NM\_175862.2:304  
CgCctGcgagtctGGtatGAGTTCTGAATGAGGTATACTTATTCAAGAGATAAGTATACTCATTGAGAACCTTTTTGct  
cgagctggcgaattcc  
>CD\_NM\_175862.2:136  
CgCctGcgagtctGGtatGAGGACTGAGTAACATTCCTTTTTCAAGAGAAAAGAGAATGTTACTCAGTCCCTTTTTGct  
cgagctggcgaattcc  
>CD\_NM\_175862.2:671  
CgCctGcgagtctGGtatGCTGCAGAAATCTCAAGATAATGTTCAAGAGACATTATCTTGAGATTTCTGCATTTTTTgct  
cgagctggcgaattcc  
>CD\_NM\_175862.2:763  
CgCctGcgagtctGGtatGATTCTGTATTCTGAAACTGACTTCAAGAGAGTCAGTTTCCAGAATACAGAAGTTTTTgct  
cgagctggcgaattcc  
>CD\_NM\_175862.2:515  
CgCctGcgagtctGGtatGACTAACTTCAGTCAACCTGAAATTCAGAGATTTAGGTTGACTGAAGTTAGCTTTTTTgct  
cgagctggcgaattcc  
>CD\_NM\_175862.2:733

CgCctGcgagtctGGtatGCTTCCCTGATGTTACGAGCAATTTCAAGAGAATTGCTCGTAACATCAGGGAATTTTTTGct  
cgagctggcgaattcc  
>CD\_NM\_175862.2:682  
CgCctGcgagtctGGtatGCCAAGATAATGTCACAGAAGTTCAGAGACAGTTCTGTGACATTATCTTGATTTTTTGct  
cgagctggcgaattcc  
>CD\_NM\_175862.2:322  
CgCctGcgagtctGGtatGATTAGGCCAAAGAGAAATTTGACTTCAAGAGAGTCAAATTTCTCTTTGCCAAGTTTTTGct  
cgagctggcgaattcc  
>CD\_NM\_175862.2:938  
CgCctGcgagtctGGtatGAGGCCCTCGCAACTCTTATAAATTTCAAGAGAATTTATAAGAGTTGCGAGGCCGTTTTTGct  
cgagctggcgaattcc  
>CD\_NM\_175862.2:758  
CgCctGcgagtctGGtatGCCCATCTTCTGTATTCTGGAAATTTCAAGAGATTTCCAGAATACAGAAGATGGTTTTTTGct  
cgagctggcgaattcc  
>CD\_NM\_175862.2:658  
CgCctGcgagtctGGtatGATATGATGGTATTATGCAGAAATTTCAAGAGATTTCTGCATAATACCATCATACTTTTTGct  
cgagctggcgaattcc  
>CD\_NM\_175862.2:716  
CgCctGcgagtctGGtatGCTCAGCTTGTCTGTTTCATTCTTCAAGAGAGGAATGAAACAGACAAGCTGATTTTTTGct  
cgagctggcgaattcc  
>CD\_NM\_002659:756  
CgCctGcgagtctGGtatGACGGGCTCCAATGGTTTCCACATTTCAAGAGATGTGGAAACCATTGGAGCCCCTTTTTGct  
cgagctggcgaattcc  
>CD\_NM\_002659:829  
CgCctGcgagtctGGtatGCGGGCCCAATCCTGGAGCTTGATTCAAGAGATCAAGCTCCAGGATTGGGCCCTTTTTTGct  
cgagctggcgaattcc  
>CD\_NM\_002659:1047  
CgCctGcgagtctGGtatGAACCTGGGTGACGCCTTCAGCATTCAAGAGATGCTGAAGGCGTCACCCAGGTGTTTTTGct  
cgagctggcgaattcc  
>CD\_NM\_002659:1176  
CgCctGcgagtctGGtatGCGCCTCACCATCACCTGCTAATTTCAAGAGATTAGCAGGGTGATGGTGAGGCTTTTTTGct  
cgagctggcgaattcc  
>CD\_NM\_002659:1216  
CgCctGcgagtctGGtatGAAGGCACTCTCCTCTGGACCTATTTCAAGAGATAGGTCCAGAGGAGAGTGCTCTTTTTTGct  
cgagctggcgaattcc  
>CD\_NM\_002659:830  
CgCctGcgagtctGGtatGAGGCCCAATCCTGGAGCTTGAATTTCAAGAGATTTCAAGCTCCAGGATTGGGCCCTTTTTTGct  
cgagctggcgaattcc  
>CD\_NM\_002659.2:658  
CgCctGcgagtctGGtatGATGCCTGGATGTGGTGACCCACTTCAAGAGAGTGGGTACCACATCCAGGCACTTTTTGct  
cgagctggcgaattcc  
>CD\_NM\_002659.2:582  
CgCctGcgagtctGGtatGCTTCCCTGTGGCTCATCAGACATTTCAAGAGAATGTCTGATGAGCCACAGGAAATTTTTGct  
cgagctggcgaattcc  
>CD\_NM\_002659.2:1176  
CgCctGcgagtctGGtatGACCTCACCATCACCTGCTAATTTCAAGAGAATTAGCAGGGTGATGGTGAGGCTTTTTTGct  
cgagctggcgaattcc  
>CD\_NM\_002659.2:760  
CgCctGcgagtctGGtatGATCCAATGGTTTCCACAACAACCTTCAAGAGAGTTGTTGTGGAAACCATTGGAGTTTTTGct  
cgagctggcgaattcc  
>CD\_NM\_002659.2:916  
CgCctGcgagtctGGtatGCGAAGAGACTTTCCTCATTGACTTCAAGAGAGTCAATGAGGAAAGTCTTTCATTTTTGct  
cgagctggcgaattcc  
>CD\_NM\_002659.2:465



CgCtGcgagtctGGtatGCTCGGACTGGCTTGAAGATCACTTCAAGAGAGTGATCTTCAAGCCAGTCCGATTTTTTgct  
cgagctggcgaattcc  
>CD\_NM\_002659.2:430  
CgCtGcgagtctGGtatGCACCCACTCAGAGAAGACCAACTTCAAGAGAGTTGGTCTTCTCTGAGTGGGTATTTTTGct  
cgagctggcgaattcc  
>CD\_NM\_002659.2:562  
CgCtGcgagtctGGtatGCAGCCGTTACCTCGAATGCATTTTTCAAGAGAAATGCATTCGAGGTAACGGCTTTTTTgct  
cgagctggcgaattcc  
>CD\_NM\_002659.2:578  
CgCtGcgagtctGGtatGCGCATTTCTGTGGCTCATCAGTTCAAGAGACTGATGAGCCACAGGAAATGCATTTTTGct  
cgagctggcgaattcc  
>CD\_NM\_002659.2:792  
CgCtGcgagtctGGtatGCCTTCTGAAAATGCTGCAACACTTCAAGAGAGTGTGCAGCATTTTCAGGAAGTTTTTgct  
cgagctggcgaattcc  
>CD\_NM\_002659.2:380  
CgCtGcgagtctGGtatGATGCGCTTGTGGGAAGAAGGAGTTCAAGAGACTCCTTCTTCCCACAAGCGCACTTTTTgct  
cgagctggcgaattcc  
>CD\_NM\_002659.2:1051  
CgCtGcgagtctGGtatGAGGTGACGCCTTCAGCATGAACTTCAAGAGAGTTCATGCTGAAGGCGTCACCCTTTTTGct  
cgagctggcgaattcc  
>CD\_NM\_002659.2:499  
CgCtGcgagtctGGtatGAGTTGTGTGTGGTTAGACTTGTTCGAAGAGACAAGTCTAACCACACACAACCTTTTTGct  
cgagctggcgaattcc  
>CD\_NM\_002659.2:795  
CgCtGcgagtctGGtatGCCCTGAAAATGCTGCAACACCCTTCAAGAGAGTGGTGTTCAGCATTTTCAGGATTTTTGct  
cgagctggcgaattcc  
>CD\_NM\_002659.2:970  
CgCtGcgagtctGGtatGAACCGGCACTCACGAACCGAAATTCGAAGAGATTTTCGGTTCGTGAGTGCCGGTTTTTGct  
cgagctggcgaattcc  
>CD\_NM\_002659.2:250  
CgCtGcgagtctGGtatGACCGCTGCTGCTGCTGCTCCACTTCAAGAGAGTGGAGCAGCAGCAGCAGCGGCTTTTTGct  
cgagctggcgaattcc  
>CD\_NM\_002659.2:1077  
CgCtGcgagtctGGtatGCTGATGTCTCTGCTGTACTAATTCGAAGAGATTAGTACAGCAGGAGACATCAATTTTTGct  
cgagctggcgaattcc  
>CD\_NM\_002659.2:295  
CgCtGcgagtctGGtatGACTGCGGTGCATGCAGTGTAAGTTCAAGAGACTTACACTGCATGCACCGCAGGTTTTTgct  
cgagctggcgaattcc  
>CD\_NM\_002659.2:725  
CgCtGcgagtctGGtatGATCCGTGGCTGTGGCTACCTTCTTCAAGAGAGAAGGTAGCCACAGCCACGGAGTTTTTgct  
cgagctggcgaattcc  
>CD\_NM\_002659.2:493  
CgCtGcgagtctGGtatGCACCGAGGTTGTGTGTGGTTATTCAAGAGATAACCCACACACAACCTCGGTATTTTTGct  
cgagctggcgaattcc  
>CD\_NM\_002659.2:635  
CgCtGcgagtctGGtatGAAGTGCCGAGCCCTGAAGAACTTCAAGAGAGTTCCTCAGGGCTGCGGCACTTTTTGct  
cgagctggcgaattcc  
>CD\_NM\_002659.2:300  
CgCtGcgagtctGGtatGAGTGCATGCAGTGTAAGACCAATTCGAAGAGATTGGTCTTACTGCATGCACCTTTTTGct  
cgagctggcgaattcc  
>CD\_NM\_002659.2:1047  
CgCtGcgagtctGGtatGCCCTGGGTGACGCCTTCAGCATTTTCAAGAGAATGCTGAAGGCGTCACCCAGGTTTTTgct  
cgagctggcgaattcc  
>CD\_NM\_002659.2:403

CgCctGcgagtctGGtatGCGAGCTGGAGCTGGTGGAGAAATTC AAGAGATTTCTCCACCAGCTCCAGCTCTTTTTTGct  
cgagctggcgaattcc  
>CD\_NM\_002659.2:563  
CgCctGcgagtctGGtatGCGCCGTTACCTCGAATGCATTTTTCAAGAGAAAATGCATTCGAGGTAACGGCTTTTTTGct  
cgagctggcgaattcc  
>CD\_NM\_002659.2:573  
CgCctGcgagtctGGtatGCCGAATGCATTTCTGTGGCTCTTCAAGAGAGAGCCACAGGAAATGCATTCGATTTTTTGct  
cgagctggcgaattcc  
>CD\_NM\_002659.2:445  
CgCctGcgagtctGGtatGAACCAACAGGACCCTGAGCTATTTCAAGAGAATAGCTCAGGGTCTGTGGTCTTTTTTGct  
cgagctggcgaattcc  
>CD\_NM\_001736:419  
CgCctGcgagtctGGtatGAACCGCTTCTGCTGGTGTATTATTCAAGAGATAAACACCAGCAGAAAAGCGGTCTTTTTTGct  
cgagctggcgaattcc  
>CD\_NM\_001736:660  
CgCctGcgagtctGGtatGAGCCTCTACTCACGCTCACGATTTCAAGAGAATCGTGAGCGTGAGTAGAGGCCTTTTTGct  
cgagctggcgaattcc  
>CD\_NM\_001736:838  
CgCctGcgagtctGGtatGCCCCACCTTCTGCTGCTGAATTTCAAGAGAATTCAGCAGCAGGAAGGTGGTTTTTTTTGct  
cgagctggcgaattcc  
>CD\_NM\_001736:863  
CgCctGcgagtctGGtatGATGGACTCCCTGTGTGTCTCCTTTCAAGAGAAGGAGACACACAGGGAGTCCAGTTTTTGct  
cgagctggcgaattcc  
>CD\_NM\_001736:869  
CgCctGcgagtctGGtatGCCCTGTGTGTCTCCTTTGCCTTTCAAGAGAAGGCAAAGGAGACACACAGGGATTTTTTGct  
cgagctggcgaattcc  
>CD\_NM\_001736.2:45  
CgCctGcgagtctGGtatGACCTGATTATGGGCACTATGATTTCAAGAGAATCATAGTGCCATAATCAGGGTTTTTGct  
cgagctggcgaattcc  
>CD\_NM\_001736.2:887  
CgCctGcgagtctGGtatGACTACATCAACTGCTGCATCAATTC AAGAGATTGATGCAGCAGTTGATGTAGTTTTTGct  
cgagctggcgaattcc  
>CD\_NM\_001736.2:671  
CgCctGcgagtctGGtatGAGCTCACGATTTGTTACACTTTTTCAAGAGAAAAGTGTAACAAATCGTGAGCGTTTTTGct  
cgagctggcgaattcc  
>CD\_NM\_001736.2:128  
CgCctGcgagtctGGtatGAAGACATCCTGGCCTTGGTCATTTCAAGAGAATGACCAAGGCCAGGATGTCTGTTTTTGct  
cgagctggcgaattcc  
>CD\_NM\_001736.2:840  
CgCctGcgagtctGGtatGAACCTTCTGCTGCTGAATAAGTTCAAGAGACTTATTCAGCAGCAGGAAGGTGTTTTTGct  
cgagctggcgaattcc  
>CD\_NM\_001736.2:869  
CgCctGcgagtctGGtatGACCTGTGTGTCTCCTTTGCCTATTCAAGAGATAGGCAAAGGAGACACACAGGGTTTTTGct  
cgagctggcgaattcc  
>CD\_NM\_001736.2:1040  
CgCctGcgagtctGGtatGCGGACACTATGGCCCAGAAGACTTCAAGAGAGTCTTCTGGGCCATAGTGTCCATTTTTTGct  
cgagctggcgaattcc  
>CD\_NM\_001736.2:975  
CgCctGcgagtctGGtatGACTCCGGAACGTGTTGACTGAATTC AAGAGATTCAGTCAACACGTTCCGGAGTTTTTGct  
cgagctggcgaattcc  
>CD\_NM\_001736.2:360  
CgCctGcgagtctGGtatGATCCCTCATCTGCTCAACATGTTCAAGAGACATGTTGAGCAGGATGAGGGAGTTTTTGct  
cgagctggcgaattcc  
>CD\_NM\_001736.2:420

CgCctGcgagtctGGtatGACGCTTCTGCTGGTGTTTAAATTCAAGAGATTTAAACACCAGCAGAAAGCGGTTTTTGct  
cgagctggcgaattcc  
>CD\_NM\_001736.2:165  
CgCctGcgagtctGGtatGACTGGTGGGAGTGTGGGCAATTTCAAGAGAATTGCCCAGCACTCCCACCAGTTTTTGct  
cgagctggcgaattcc  
>CD\_NM\_001736.2:865  
CgCctGcgagtctGGtatGAACTCCCTGTGTGTCTCTTTGTTCAAGAGACAAAGGAGACACACAGGGAGTCTTTTTGct  
cgagctggcgaattcc  
>CD\_NM\_001736.2:837  
CgCctGcgagtctGGtatGCCCCACCTTCTGCTGCTGAATTTCAAGAGAATTCAGCAGCAGGAAGGTGGGTTTTTTGct  
cgagctggcgaattcc  
>CD\_NM\_001736.2:719  
CgCctGcgagtctGGtatGAGGCCACGCGGTCCACCAAGACTTCAAGAGAGTCTTGGTGGACCGCGTGGCCTTTTTGct  
cgagctggcgaattcc  
>CD\_NM\_001736.2:425  
CgCctGcgagtctGGtatGCTCTGCTGGTGTTTAAACCCATTTCAAGAGAATGGGTTTTAAACACCAGCAGAATTTTTGct  
cgagctggcgaattcc  
>CD\_NM\_001736.2:875  
CgCctGcgagtctGGtatGATGTCTCCTTTGCCTACATCAATTTCAAGAGATTGATGTAGGCAAAGGAGACACTTTTTGct  
cgagctggcgaattcc  
>CD\_NM\_001736.2:287  
CgCctGcgagtctGGtatGCGCCCATCTTGTTCACGTCCATTTCAAGAGAATGGACGTGAACAAGATGGGCATTTTTGct  
cgagctggcgaattcc  
>CD\_NM\_001736.2:225  
CgCctGcgagtctGGtatGAACCATCAATGCCATCTGGTTCTTCAAGAGAGAACCAGATGGCATTGATGGTCTTTTTGct  
cgagctggcgaattcc  
>CD\_NM\_001736.2:764  
CgCctGcgagtctGGtatGCGGCCAGTTTCTTTATCTTCTGTTCAAGAGACAGAAGATAAAGAACTGGCCATTTTTGct  
cgagctggcgaattcc  
>CD\_NM\_001736.2:758  
CgCctGcgagtctGGtatGAAGTGGTGGCCAGTTTCTTTATTTCAAGAGAATAAAGAACTGGCCACCCTGTTTTGct  
cgagctggcgaattcc  
>CD\_NM\_001736.2:419  
CgCctGcgagtctGGtatGCCCCTTCTGCTGGTGTTTAAATTCAAGAGATTTAAACACCAGCAGAAAGCGGTTTTTGct  
cgagctggcgaattcc  
>CD\_NM\_001736.2:762  
CgCctGcgagtctGGtatGAGTGGCCAGTTTCTTTATCTTCTTCAAGAGAGAAGATAAAGAACTGGCCACCTTTTTGct  
cgagctggcgaattcc  
>CD\_NM\_001736.2:993  
CgCctGcgagtctGGtatGCGAAGAGTCCGTGGTTAGGGAGTTCAAGAGACTCCCTAACCACGGACTCTTCATTTTTGct  
cgagctggcgaattcc  
>CD\_NM\_001736.2:1038  
CgCctGcgagtctGGtatGCGTGGACACTATGGCCCAGAAGTTCAAGAGACTTCTGGGCCATAGTGTCCACTTTTTGct  
cgagctggcgaattcc  
>CD\_NM\_001736.2:392  
CgCctGcgagtctGGtatGCCCTGCTCCTGGCCACCATCAGTTCAAGAGACTGATGGTGGCCAGGAGCAGGATTTTTGct  
cgagctggcgaattcc  
>CD\_NM\_001736.2:284  
CgCctGcgagtctGGtatGAGCTGCCATCTTGTTCACGTCTTCAAGAGAGACGTGAACAAGATGGGCAGCGTTTTTGct  
cgagctggcgaattcc  
>CD\_NM\_001736.2:681  
CgCctGcgagtctGGtatGCTGTTACACTTTCATCCTGCTCTTCAAGAGAGAGCAGGATGAAAGTGAACAATTTTTGct  
cgagctggcgaattcc  
>CD\_NM\_001736.2:768

CgCtGcgagtctGGtatGAAGTTTCTTTATCTTCTGGTTGTTCAAGAGACAACCAGAAGATAAAGAACTGTTTTTGct  
cgagctggcgaattcc  
>CD\_NM\_002000:942  
CgCtGcgagtctGGtatGCGGCACAGCCATACGGCACTGATTCAAGAGATCAGTGCCGTATGGCTGTGCCATTTTTGct  
cgagctggcgaattcc  
>CD\_NM\_002000:267  
CgCtGcgagtctGGtatGAGGGACTTTCCCATGCCTTTCATTCAAGAGATGAAAGGCATGGGAAAGTCCCCTTTTTGct  
cgagctggcgaattcc  
>CD\_NM\_133279:482  
CgCtGcgagtctGGtatGCGGGCGCTATCAGTGCCAATATTTCAAGAGAATATTGGCACTGATAGCGCCCTTTTTGct  
cgagctggcgaattcc  
>CD\_NM\_002000:363  
CgCtGcgagtctGGtatGCACCTGACCCAGCTGATGATCATTCAAGAGATGATCATCAGCTGGGTACAGTATTTTTGct  
cgagctggcgaattcc  
>CD\_NM\_002000:341  
CgCtGcgagtctGGtatGATGCCAGGCCATTCGTGAAGCTTTCAAGAGAAGCTTCACGAATGGCCTGGCACTTTTGct  
cgagctggcgaattcc  
>CD\_NM\_133279:543  
CgCtGcgagtctGGtatGAAGCTGGTAGTGACAGGCTTGTTCAGAGAACAAGCCTGTCACTACCAGCTTTTTGct  
cgagctggcgaattcc  
>CD\_NM\_002000:481  
CgCtGcgagtctGGtatGAAGGGCGCTATCAGTGCCAATATTTCAAGAGATATTGGCACTGATAGCGCCCTTTTTGct  
cgagctggcgaattcc  
>CD\_NM\_133279:597  
CgCtGcgagtctGGtatGATGGTGTGATGCCAGGAGAGATTCAAGAGATCTCTCCTGGCATCAACACCAGTTTTGct  
cgagctggcgaattcc  
>CD\_NM\_002000.2:1041  
CgCtGcgagtctGGtatGAACCAAGTGTCTGCAAGTAACTTCAAGAGAGTTTACTTGCAGACACTTGGTGTTTTTGct  
cgagctggcgaattcc  
>CD\_NM\_002000.2:442  
CgCtGcgagtctGGtatGCCCTGAGTTCGTTCATTGACCACTTCAAGAGAGTGGTCAATGACGAACTCAGGATTTTTGct  
cgagctggcgaattcc  
>CD\_NM\_002000.2:868  
CgCtGcgagtctGGtatGAACGCAGAACTTGATCCGCATGTTCAAGAGACATGCGGATCAAGTTCTGCGTCTTTTTGct  
cgagctggcgaattcc  
>CD\_NM\_002000.2:841  
CgCtGcgagtctGGtatGAACAGACTCCATCCACCAAGATTTCAAGAGAATCTTGGTGGATGGAGTCTGTGTTTTTGct  
cgagctggcgaattcc  
>CD\_NM\_002000.2:483  
CgCtGcgagtctGGtatGAGCGCTATCAGTGCCAATATAGTTCAAGAGACTATATTGGCACTGATAGCGCCCTTTTTGct  
cgagctggcgaattcc  
>CD\_NM\_002000.2:293  
CgCtGcgagtctGGtatGACCAAATCGAGTCCGTGATTCTTCAAGAGAGAATCACAGGACTCGATTTGGCTTTTTGct  
cgagctggcgaattcc  
>CD\_NM\_002000.2:549  
CgCtGcgagtctGGtatGCAGTGACAGGCTTGTATGGCAATTCAAGAGATTGCCATACAAGCCTGTCACTATTTTTGct  
cgagctggcgaattcc  
>CD\_NM\_002000.2:551  
CgCtGcgagtctGGtatGATGACAGGCTTGTATGGCAAATTTCAAGAGAGTTTGGCATAACAAGCCTGTCACTTTTTGct  
cgagctggcgaattcc  
>CD\_NM\_002000.2:402  
CgCtGcgagtctGGtatGAAGAGATAGGCAGAAGACTGAATTCAAGAGATTGAGTCTTCTGCTATCTCTTTTTGct  
cgagctggcgaattcc  
>CD\_NM\_002000.2:826

CgCctGcgagtctGGtatGATTGGAGCTTGTGGTCACAGACTTCAAGAGAGTCTGTGACCACAAGCTCCAAGTTTTTGct  
cgagctggcgaattcc  
>CD\_NM\_002000.2:454  
CgCctGcgagtctGGtatGAATTGACCACATGGACGCAAACCTTCAAGAGAGTTTGGCTCCATGTGGTCAATGTTTTTGct  
cgagctggcgaattcc  
>CD\_NM\_002000.2:597  
CgCctGcgagtctGGtatGCGGTGTTGATGCCAGGAGAGAATTCAAGAGATTCTCTCCTGGCATCAACACCATTTTTTGct  
cgagctggcgaattcc  
>CD\_NM\_002000.2:1039  
CgCctGcgagtctGGtatGCACACCAAGTGTCTGCAAGTAATTCAAGAGATTACTTGCAGACACTTGGTGTTTTTTTGct  
cgagctggcgaattcc  
>CD\_NM\_002000.2:493  
CgCctGcgagtctGGtatGATGCCAATATAGGATAGGGCACTTCAAGAGAGTGCCCTATCCTATATTGGCACTTTTTTGct  
cgagctggcgaattcc  
>CD\_NM\_002000.2:231  
CgCctGcgagtctGGtatGCGCTCTGTCTGGGCCAGAGGATTTCAAGAGAATCCTCTGGCCCAGACAGAGCATTTTTTGct  
cgagctggcgaattcc  
>CD\_NM\_002000.2:907  
CgCctGcgagtctGGtatGACTCGTGGCTCTCTTGGCCATATTCAAGAGATATGGCCAAGAGAGCCACGAGTTTTTGct  
cgagctggcgaattcc  
>CD\_NM\_002000.2:298  
CgCctGcgagtctGGtatGCTCGAGTCCGTGATTCCCTTGTTC AAGAGACAAGGAATCACAGGACTCGATTTTTTGct  
cgagctggcgaattcc  
>CD\_NM\_002000.2:677  
CgCctGcgagtctGGtatGAAGGGAGAACTTTCTCTGCCACTTCAAGAGAGTGGCAGAGAAAGTTCTCCCTTTTTTGct  
cgagctggcgaattcc  
>CD\_NM\_002000.2:733  
CgCctGcgagtctGGtatGCTTGGGTCTGTGGACCTCAATTTCAAGAGAATTGAGGTCCACAGGACCCAAATTTTTTGct  
cgagctggcgaattcc  
>CD\_NM\_002000.2:436  
CgCctGcgagtctGGtatGAACTGATCCTGAGTTCGTCAATTTCAAGAGAAATGACGAACTCAGGATCAGTCTTTTTTGct  
cgagctggcgaattcc  
>CD\_NM\_002000.2:312  
CgCctGcgagtctGGtatGCTCCCTTGGATGGATCTGTGAATTCAAGAGATTCACAGATCCATCCAAGGAATTTTTTGct  
cgagctggcgaattcc  
>CD\_NM\_002000.2:241  
CgCctGcgagtctGGtatGAGGCCAGAGGATTCAGGCACAGTTCAAGAGACTGTGCCTGAATCCTCTGGCCCTTTTTTGct  
cgagctggcgaattcc  
>CD\_NM\_002000.2:639  
CgCctGcgagtctGGtatGAAGCACACATCCCATTTGATAGTTCAAGAGACTATCAAATGGGATGTGTGCTGTTTTTGct  
cgagctggcgaattcc  
>CD\_NM\_002000.2:556  
CgCctGcgagtctGGtatGCGGCTTGTATGGCAAACCCTTCTTCAAGAGAGAAGGGTTTGGCATAACAAGCCTTTTTTGct  
cgagctggcgaattcc  
>CD\_NM\_002000.2:971  
CgCctGcgagtctGGtatGACCTCGGCAGATGTGGCTGAACTTCAAGAGAGTTCAGCCACATCTGCCGAGGCTTTTTTGct  
cgagctggcgaattcc  
>CD\_NM\_006288:283  
CgCctGcgagtctGGtatGACCGAACCAACTTCACCAGCAATTCAAGAGATTGCTGGTGAAGTTGGTTCGGTTTTTGct  
cgagctggcgaattcc  
>CD\_NM\_006288:307  
CgCctGcgagtctGGtatGCCAACATGAAGGTCTCTACTTTTTCAAGAGAAAGTAGAGGACCTTCATGTTGTTTTTGct  
cgagctggcgaattcc  
>CD\_NM\_006288:411

CgCctGcgagtctGGtatGCACGTCACAGTGCTCAGAGACATTCAAGAGATGTCTCTGAGCACTGTGACGTTTTTTTGct  
cgagctggcgaattcc  
>CD\_NM\_006288.2:267  
CgCctGcgagtctGGtatGCGCACACATACCGCTCCCGAAGTTCAAGAGAGTTCGGGAGCGGTATGTGTGCTTTTTTTGct  
cgagctggcgaattcc  
>CD\_NM\_006288.2:448  
CgCctGcgagtctGGtatGAGGCATCAGCCTGCTGGCTCAGTTCAAGAGACTGAGCCAGCAGGCTGATGCCCTTTTTTGct  
cgagctggcgaattcc  
>CD\_NM\_006288.2:321  
CgCctGcgagtctGGtatGCCTACTTATCCGCCTTCACTAGTTCAAGAGACTAGTGAAGGCGGATAAGTAGATTTTTTGct  
cgagctggcgaattcc  
>CD\_NM\_006288.2:403  
CgCctGcgagtctGGtatGATCCCAGAACGTCACAGTGCTCTTCAAGAGAGACTGTGACGTTCTGGGAGTTTTTTGct  
cgagctggcgaattcc  
>CD\_NM\_006288.2:411  
CgCctGcgagtctGGtatGCCGTCACAGTGCTCAGAGACAATTCAAGAGATTGTCTCTGAGCACTGTGACGTTTTTTGct  
cgagctggcgaattcc  
>CD\_NM\_006288.2:409  
CgCctGcgagtctGGtatGAAACGTCACAGTGCTCAGAGACTTCAAGAGAGTCTCTGAGCACTGTGACGTTCTTTTTGct  
cgagctggcgaattcc  
>CD\_NM\_006288.2:432  
CgCctGcgagtctGGtatGCACTGGTCAAGTGTGAGGGCATTTCAGAGAATGCCCTCACACTTGACCAGTTTTTTTGct  
cgagctggcgaattcc  
>CD\_NM\_006288.2:111  
CgCctGcgagtctGGtatGAGCAGAAGGTGACCAGCCTAACTTCAAGAGAGTTAGGCTGGTCACCTTCTGCCTTTTTTGct  
cgagctggcgaattcc  
>CD\_NM\_006288.2:209  
CgCctGcgagtctGGtatGCTCAGCCTGACCCGTGAGACAATTCAAGAGATTGTCTCACGGGTGAGGCTGAATTTTTGct  
cgagctggcgaattcc  
>CD\_NM\_006288.2:122  
CgCctGcgagtctGGtatGCCAGCCTAACGGCCTGCCTAGTTCAAGAGACTAGGCAGGCCGTTAGGCTGGTTTTTTGct  
cgagctggcgaattcc  
>CD\_NM\_006288.2:211  
CgCctGcgagtctGGtatGAAGCCTGACCCGTGAGACAAAGTTCAAGAGACTTTGTCTCACGGGTGAGGCTGTTTTTTGct  
cgagctggcgaattcc  
>CD\_NM\_006288.2:283  
CgCctGcgagtctGGtatGACGAACCAACTTACCAGCAAATTCAAGAGATTTGCTGGTGAAGTTGGTTCGGTTTTTTGct  
cgagctggcgaattcc  
>CD\_NM\_006288.2:160  
CgCctGcgagtctGGtatGCCTGGACTGCCGCCATGAGAATTTCAAGAGAATTCTCATGGCGGCAGTCCAGATTTTTTGct  
cgagctggcgaattcc  
>CD\_NM\_006288.2:73  
CgCctGcgagtctGGtatGAATCGCTCTCCTGCTAACAGTCTTCAAGAGAGACTGTTAGCAGGAGAGCGATGTTTTTTGct  
cgagctggcgaattcc  
>CD\_NM\_006288.2:184  
CgCctGcgagtctGGtatGAAGCAGTTCACCCATCCAGTACTTCAAGAGAGTACTGGATGGGTGAACTGCTGTTTTTTGct  
cgagctggcgaattcc  
>CD\_NM\_006288.2:192  
CgCctGcgagtctGGtatGAACCCATCCAGTACGAGTTCAGTTCAAGAGACTGAACTCGTACTGGATGGGTGTTTTTTGct  
cgagctggcgaattcc  
>CD\_NM\_006288.2:109  
CgCctGcgagtctGGtatGCGGGCAGAAGGTGACCAGCCTATTCAAGAGATAGGCTGGTCACCTTCTGCCCTTTTTTTGct  
cgagctggcgaattcc  
>CD\_NM\_006288.2:424

CgCctGcgagtctGGtatGAAGAGACAAACTGGTCAAGTGTTC AAGAGAACACTTGACCAGTTTGTCTCTGTTTTTGct  
cgagctggcgaattcc  
>CD\_NM\_006288.2:198  
CgCctGcgagtctGGtatGCCAGTACGAGTTCAGCCTGACTTCAAGAGAGTCAGGCTGAACTCGTACTGGATTTTTTGct  
cgagctggcgaattcc  
>CD\_NM\_006288.2:84  
CgCctGcgagtctGGtatGCGCTAACAGTCTTGCAGGTCTCTTCAAGAGAGAGACCTGCAAGACTGTTAGCATTTTTTGct  
cgagctggcgaattcc  
>CD\_NM\_006288.2:226  
CgCctGcgagtctGGtatGAACAAAGAAGCACGTGCTCTTTTTCAAGAGAAAAGAGCACGTGCTTCTTTGTCTTTTTTGct  
cgagctggcgaattcc  
>CD\_NM\_006288.2:331  
CgCctGcgagtctGGtatGAGCCTTCACTAGCAAGGACGAGTTC AAGAGACTCGTCCTTGCTAGTGAAGGCGTTTTTGct  
cgagctggcgaattcc  
>CD\_NM\_006288.2:295  
CgCctGcgagtctGGtatGAACCAGCAAATACAACATGAAGTTC AAGAGACTTCATGTTGTATTTGCTGGTGTTTTTTGct  
cgagctggcgaattcc  
>CD\_NM\_006288.2:517  
CgCctGcgagtctGGtatGAGCCACGGATTCATGTCCCTGTTCAAGAGACAGGGACATGAAATCCGTGGCCTTTTTTGct  
cgagctggcgaattcc  
>CD\_NM\_006288.2:282  
CgCctGcgagtctGGtatGACCGAACCAACTTCACCAGCAATTCAAGAGATTGCTGGTGAAGTTGGTTCGGTTTTTGct  
cgagctggcgaattcc  
>CD\_NM\_006288.2:318  
CgCctGcgagtctGGtatGCCCTCTACTTATCCGCCTTCACTTCAAGAGAGTGAAGGCGGATAAGTAGAGGATTTTTTGct  
cgagctggcgaattcc  
>CD\_NM\_006288.2:68  
CgCctGcgagtctGGtatGCTCAGCATCGCTCTCCTGCTAATTCAAGAGATTAGCAGGAGAGCGATGCTGATTTTTTGct  
cgagctggcgaattcc  
>CD\_NM\_006288.2:405  
CgCctGcgagtctGGtatGACCAGAACGTCACAGTGCTCAGTTC AAGAGACTGAGCACTGTGACGTTCTGGTTTTTGct  
cgagctggcgaattcc  
>CD\_NM\_006288.2:288  
CgCctGcgagtctGGtatGACAACTTCACCAGCAAATACAATTCAAGAGATTGTATTTGCTGGTGAAGTTGGTTTTTGct  
cgagctggcgaattcc  
>CD\_NM\_006288.2:507  
CgCctGcgagtctGGtatGACCTCCTCCAGGCCACGGATTTTTCAAGAGAAAATCCGTGGCCTGGAGGAGGGTTTTTGct  
cgagctggcgaattcc  
>CD\_NM\_002332:1707  
CgCctGcgagtctGGtatGCCGGCCTGACTGTGTTTGAGAATTCAAGAGATTCTCAAACACAGTCAGGCCGTTTTTGct  
cgagctggcgaattcc  
>CD\_NM\_002332:2370  
CgCctGcgagtctGGtatGATGCTCAGACCCGCAAGACTTTTTCAAGAGAAAAGTCTTGC GGCTGAGCAGTTTTTGct  
cgagctggcgaattcc  
>CD\_NM\_002332:3845  
CgCctGcgagtctGGtatGAGCGACAATGACTGTGAGGATATTCAAGAGATATCCTCACAGTCATTGTCGCCTTTTTTGct  
cgagctggcgaattcc  
>CD\_NM\_002332:4009  
CgCctGcgagtctGGtatGATGCGACCAGTGCTCTCTGAATTTCAAGAGAA TTCAGAGAGCACTGGTCGAGTTTTTGct  
cgagctggcgaattcc  
>CD\_NM\_002332:10087  
CgCctGcgagtctGGtatGAGCCC GCGAGGACTACATTGAATTTCAAGAGATTCAATGTAGTCCTCGCGGGCGTTTTTGct  
cgagctggcgaattcc  
>CD\_NM\_002332:13778

CgCctGcgagtctGGtatGACCGGAGTGGTATTCTGGTATATTCAAGAGATATAACCAGAATACCACTCCGGCTTTTTGct  
cgagctggcgaattcc  
>CD\_NM\_002332.1:1709  
CgCctGcgagtctGGtatGAGCCTGACTGTGTTTGAGAATTTTCAAGAGAAATTTCTCAAACACAGTCAGGCCTTTTTGct  
cgagctggcgaattcc  
>CD\_NM\_002332.1:1707  
CgCctGcgagtctGGtatGAGGCCTGACTGTGTTTGAGAATTTCAAGAGAAATTTCTCAAACACAGTCAGGCCGTTTTGct  
cgagctggcgaattcc  
>CD\_NM\_002332.1:10832  
CgCctGcgagtctGGtatGCCAGTTCCAGTGCTCCATTACTTCAAGAGAGTAATGGAGCACTGGAACCTGGTTTTTTGct  
cgagctggcgaattcc  
>CD\_NM\_002332.1:6762  
CgCctGcgagtctGGtatGCTCAGTGTCTGTGTTTGAGGATTTCAAGAGAAATCCTCAAACACAGACACTGAATTTTTGct  
cgagctggcgaattcc  
>CD\_NM\_002332.1:13721  
CgCctGcgagtctGGtatGAACATATAGCCTCCATCCTAATTTCAAGAGAAATAGGATGGAGGCTATATGTCTTTTGct  
cgagctggcgaattcc  
>CD\_NM\_002332.1:572  
CgCctGcgagtctGGtatGCTCAAATAACCTGTATCTCAAATTTCAAGAGATTTGAGATACAGGTTATTTGATTTTTGct  
cgagctggcgaattcc  
>CD\_NM\_002332.1:12174  
CgCctGcgagtctGGtatGCGCTATGGATGTCCATGTCAAGTTCAAGAGACTTGACATGGACATCCATAGCATTTTTGct  
cgagctggcgaattcc  
>CD\_NM\_002332.1:7428  
CgCctGcgagtctGGtatGACGTGAGACCGTCATCACTATGTTCAAGAGACATAGTGATGACGGTCTCACGCTTTTTGct  
cgagctggcgaattcc  
>CD\_NM\_002332.1:12227  
CgCctGcgagtctGGtatGAGGGCACCATCTCCTACCGCAGTTCAAGAGACTGCGGTAGGAGATGGTGCCCGTTTTGct  
cgagctggcgaattcc  
>CD\_NM\_002332.1:4431  
CgCctGcgagtctGGtatGACGCGGAAGCTGCTGGACAACCTTCAAGAGAGTTGTCCAGCAGCTTCCCGGGTTTTGct  
cgagctggcgaattcc  
>CD\_NM\_002332.1:9219  
CgCctGcgagtctGGtatGAGCTGAGGCACTGCTCTGCAACTTCAAGAGAGTTGCAGAGCAGTGCCTCAGCCTTTTTGct  
cgagctggcgaattcc  
>CD\_NM\_002332.1:9477  
CgCctGcgagtctGGtatGATGTCTGTGTGTGGAGGGCTATTTCAAGAGAAATAGCCCTCCACACACAGACACTTTTTGct  
cgagctggcgaattcc  
>CD\_NM\_002332.1:10170  
CgCctGcgagtctGGtatGCGCACTGACCCTGTTTGAGGACTTCAAGAGAGTCTCAAACAGGGTCAGTGCATTTTTGct  
cgagctggcgaattcc  
>CD\_NM\_002332.1:1711  
CgCctGcgagtctGGtatGATGACTGTGTTTGAGAATTATCTTCAAGAGAGATAATTTCTCAAACACAGTCAGTTTTGct  
cgagctggcgaattcc  
>CD\_NM\_002332.1:11081  
CgCctGcgagtctGGtatGCCAGTTCCGCTGCAAGAACAATTTCAAGAGATTTGTTCTTGCAGCGGAACTGGTTTTTTGct  
cgagctggcgaattcc  
>CD\_NM\_002332.1:11435  
CgCctGcgagtctGGtatGCCGAGTTCCAGTGCAACAACACTTCAAGAGAGTGTGTTGCACTGGAACCTGTTTTTTGct  
cgagctggcgaattcc  
>CD\_NM\_002332.1:2006  
CgCctGcgagtctGGtatGATGACGGGAAGTCATGCAAGAATTTCAAGAGATTTCTTGCATGACTTCCCGTCACTTTTGct  
cgagctggcgaattcc  
>CD\_NM\_002332.1:981



CgCctGcgagtctGGtatGCTGTGGCTGTGTTGAAGGATACTTCAAGAGAGTATCCTTCAACACAGCCACATTTTTTgct  
cgagctggcgaattcc  
>CD\_NM\_002332.1:1554  
CgCctGcgagtctGGtatGAAGCAAGATTGTGTTTCCTCATTTC AAGAGAATGAGGAAACACAATCTTGCTGTTTTTgct  
cgagctggcgaattcc  
>CD\_NM\_002332.1:7692  
CgCctGcgagtctGGtatGACACCGCTATGTGATCCTAAAGTTCAAGAGACTTTAGGATCACATAGCGGTGGTTTTTgct  
cgagctggcgaattcc  
>CD\_NM\_002332.1:1059  
CgCctGcgagtctGGtatGACCTGTGCTGTGATAGCCAACTTCAAGAGAGTTGGCTATCAACAGCACAGGGTTTTTgct  
cgagctggcgaattcc  
>CD\_NM\_002332.1:1373  
CgCctGcgagtctGGtatGAGATCTTTGTCTGCAACAGAAATTCAAGAGATTTCTGTTGCAGACAAAGATCCTTTTTTgct  
cgagctggcgaattcc  
>CD\_NM\_002332.1:6728  
CgCctGcgagtctGGtatGCGGTGGTTCGTCCAGCAACAATTCAAGAGATTGTTGCTGGACAGAACCACCTTTTTTgct  
cgagctggcgaattcc  
>CD\_NM\_002332.1:10454  
CgCctGcgagtctGGtatGATGTGTCCAACCTGCACGGCTAGTTCAAGAGACTAGCCGTGCAGTTGGACACACTTTTTTgct  
cgagctggcgaattcc  
>CD\_NM\_002332.1:6546  
CgCctGcgagtctGGtatGAGGTCAGTATCCGCGTATTGAGTTCAAGAGACTCAATACGCGGATACTGACCCTTTTTTgct  
cgagctggcgaattcc  
>CD\_NM\_002332.1:5115  
CgCctGcgagtctGGtatGACACCTGTGTCTCATCAACTACTTCAAGAGAGTAGTTGATGAGACACAGGTGGTTTTTgct  
cgagctggcgaattcc  
>CD\_NM\_002332.1:7346  
CgCctGcgagtctGGtatGAGGACACTCTCTATTGGACAAGTTCAAGAGACTTGTCCAATAGAGAGTGTCCCTTTTTTgct  
cgagctggcgaattcc  
>CD\_NM\_022109:1407  
CgCctGcgagtctGGtatGCCC CGAATGATCCTTATGTATTTCAAGAGAATACATAAGGATCATTGCGGATTTTTTgct  
cgagctggcgaattcc  
>CD\_NM\_022109:730  
CgCctGcgagtctGGtatGCTGGTGATAATCAGGTATATATTTCAAGAGAATATATACCTGATTATCACCATTTTTTgct  
cgagctggcgaattcc  
>CD\_NM\_022109:1262  
CgCctGcgagtctGGtatGCGGCAGGAGCTGTGGTAACATATTCAAGAGATATGTTACCACAGCTCCTGCCATTTTTTgct  
cgagctggcgaattcc  
>CD\_NM\_022109:221  
CgCctGcgagtctGGtatGAAGGATACGACAGCTATGGAAATTCAAGAGATTTCCATAGCTGTGCTATCCTGTTTTTgct  
cgagctggcgaattcc  
>CD\_NM\_022109:1787  
CgCctGcgagtctGGtatGCCGCTCATTGCTTCCTGTCTATTTCAAGAGAATAGACAGGAAGCAATGAGCGATTTTTTgct  
cgagctggcgaattcc  
>CD\_NM\_022109:1700  
CgCctGcgagtctGGtatGCAGCTGGGATTATGCTGCTCAATTCAAGAGATTGAGCAGCATAATCCAGCTATTTTTTgct  
cgagctggcgaattcc  
>CD\_NM\_022109:1406  
CgCctGcgagtctGGtatGCTCCGCGAATGATCCTTATGTATTTCAAGAGATACATAAGGATCATTGCGGAATTTTTTgct  
cgagctggcgaattcc  
>CD\_NM\_022109:1408  
CgCctGcgagtctGGtatGACGCGAATGATCCTTATGTATATTCAAGAGATATACATAAGGATCATTGCGGTTTTTgct  
cgagctggcgaattcc  
>CD\_NM\_080546.2:730

CgCtGcgagtctGGtatGCGGTGATAATCAGGTATATATCTTCAAGAGAGATATATACCTGATTATCACCATTTTTGct  
cgagctggcgaattcc  
>CD\_NM\_080546.2:1764  
CgCtGcgagtctGGtatGATCTGCCTCTTTGCTTTCTAGTTCAAGAGACTAGGAAAGCAAAGAGGCAGACTTTTTGct  
cgagctggcgaattcc  
>CD\_NM\_080546.2:754  
CgCtGcgagtctGGtatGAAGTACTTGTGTGGATCTTAACCTCAAGAGAGTTAAGATCCACACAAGTACTTTTTGct  
cgagctggcgaattcc  
>CD\_NM\_080546.2:1381  
CgCtGcgagtctGGtatGATTTTATTATCACATTAGTCAATTCAAGAGATTGACTAATGTGATAATGAAAGTTTTGct  
cgagctggcgaattcc  
>CD\_NM\_080546.2:819  
CgCtGcgagtctGGtatGCGGTGGCTGTATGCAAAGCAAATTCAAGAGATTTGCTTTGCATACAGCCACCATTTTTGct  
cgagctggcgaattcc  
>CD\_NM\_080546.2:1595  
CgCtGcgagtctGGtatGATTTGTTCATTCTGGTGGAGAATTTCAAGAGAATTCACCAGAAATGACAAAGTTTTGct  
cgagctggcgaattcc  
>CD\_NM\_080546.2:1010  
CgCtGcgagtctGGtatGCGCTGGCAAGGTCTTCACTTCAAGAGAGTGAATGAAGACCTTGCCAGCTTTTTGct  
cgagctggcgaattcc  
>CD\_NM\_080546.2:1700  
CgCtGcgagtctGGtatGCGCTGGGATTATGCTGCTCAACTTCAAGAGAGTTGAGCAGCATAATCCCAGCTTTTTGct  
cgagctggcgaattcc  
>CD\_NM\_080546.2:1938  
CgCtGcgagtctGGtatGCTGAAAGAAGCTGGTAAGGGAGTTCAAGAGACTCCCTTACCAGCTTCTTTCATTTTTGct  
cgagctggcgaattcc  
>CD\_NM\_080546.2:1892  
CgCtGcgagtctGGtatGCATGGATAAAGTGTGATGGAGTTCAAGAGACTCCATCAGCACTTTATCCATTTTTGct  
cgagctggcgaattcc  
>CD\_NM\_080546.2:1262  
CgCtGcgagtctGGtatGAGCAGGAGCTGTGGTAACATACTTCAAGAGAGTATGTTACCACAGCTCCTGCCTTTTTGct  
cgagctggcgaattcc  
>CD\_NM\_080546.2:1787  
CgCtGcgagtctGGtatGAGCTCATTGCTTCTGTCTATTTTTCAAGAGAAATAGACAGGAAGCAATGAGCGTTTTGct  
cgagctggcgaattcc  
>CD\_NM\_080546.2:343  
CgCtGcgagtctGGtatGCCTTGATAAACCGGAAGATTAATTCAAGAGATTAATCTTCCGGTTTATCAAGTTTTGct  
cgagctggcgaattcc  
>CD\_NM\_080546.2:106  
CgCtGcgagtctGGtatGCGGACCGTAGCTGCACAGACATTTCAAGAGAAATGTCTGTGCAGCTACGGTCCTTTTGct  
cgagctggcgaattcc  
>CD\_NM\_080546.2:1800  
CgCtGcgagtctGGtatGATGTCTATTTATGAAATGGTAGTTCAAGAGACTACCATTTTATAAATAGACAGTTTTGct  
cgagctggcgaattcc  
>CD\_NM\_080546.2:685  
CgCtGcgagtctGGtatGCATTGGGACTTTGCTTGTATCTTCAAGAGAGATAACAAGCAAAGTCCCAATTTTTGct  
cgagctggcgaattcc  
>CD\_NM\_080546.2:602  
CgCtGcgagtctGGtatGCGCAGAGGCCCTGATCACCTTTTTCAAGAGAAAAGGTGATCAGGGCCTTGCATTTTTGct  
cgagctggcgaattcc  
>CD\_NM\_080546.2:896  
CgCtGcgagtctGGtatGCCTTCGGGCCCTCCTCATTATTTTCAAGAGAATAAATGAGGAGGGCCGAAGTTTTGct  
cgagctggcgaattcc  
>CD\_NM\_080546.2:1995

CgCctGcgagtctGGtatGCCGGGAGCAAGTCTGCTTGAATTCAAGAGATTCAAGCAGAACTTGCTCCCGATTTTTTGct  
cgagctggcgaattcc  
>CD\_NM\_080546.2:940  
CgCctGcgagtctGGtatGAAGTGATCTTATTCCTGATAATTTCAAGAGAATTATCAGGAATAAGATCACTGTTTTTGct  
cgagctggcgaattcc  
>CD\_NM\_080546.2:1461  
CgCctGcgagtctGGtatGCGTGACGATGTGTGCTGAAATTTCAAGAGAATTTTCAGCACACATCGTGCACATTTTTTGct  
cgagctggcgaattcc  
>CD\_NM\_080546.2:1703  
CgCctGcgagtctGGtatGCCGGATTATGCTGCTCAACTACTTCAAGAGAGTAGTTGAGCAGCATAATCCCATTTTTTGct  
cgagctggcgaattcc  
>CD\_NM\_080546.2:1334  
CgCctGcgagtctGGtatGCGTAAATCGCCTTATTCGTTACTTCAAGAGAGTAACGAATAAGGCGATTTACTTTTTTGct  
cgagctggcgaattcc  
>CD\_NM\_080546.2:410  
CgCctGcgagtctGGtatGCACTCTGAGTGATGTTTCAAGAGACTTCTGAACATCACTCAGAGTTTTTTTGct  
cgagctggcgaattcc  
>CD\_NM\_080546.2:849  
CgCctGcgagtctGGtatGACCAAAGAACTGTTACTCCTGTTCAAGAGACAGGAGTAACAGTTTCTTTGGTTTTTTGct  
cgagctggcgaattcc  
>CD\_NM\_012072.2:849  
CgCctGcgagtctGGtatGAAGTCATTATTTCTGTGCAAGTTCAAGAGACTTGCACAGGAAATAATGACTCTTTTTTGct  
cgagctggcgaattcc  
>CD\_NM\_012072.2:1463  
CgCctGcgagtctGGtatGACGACAGCTTGTGCTTCAACACTTCAAGAGAGTGTGAAGCACAAGCTGTCGCTTTTTTGct  
cgagctggcgaattcc  
>CD\_NM\_012072.2:567  
CgCctGcgagtctGGtatGATGTGTGTCTCTGCTGCTGGACTTCAAGAGAGTCCAGCAGCAGAGACACACAGTTTTTTGct  
cgagctggcgaattcc  
>CD\_NM\_012072.2:674  
CgCctGcgagtctGGtatGCCGGCTTCGTGTGCAAGTTCAGTTCAAGAGACTGAACTTGCACACGAAGCCTTTTTTGct  
cgagctggcgaattcc  
>CD\_NM\_012072.2:591  
CgCctGcgagtctGGtatGATCCCAGCCGCTCCTTCCCAACTTCAAGAGAGTTGGGAAGGAGCGGCTGGGACTTTTTTGct  
cgagctggcgaattcc  
>CD\_NM\_012072.2:324  
CgCctGcgagtctGGtatGACTGGCCACTGTGAAGAGCAAGTTCAAGAGACTTGCTCTTACAGTGCCAGGTTTTTTGct  
cgagctggcgaattcc  
>CD\_NM\_012072.2:854  
CgCctGcgagtctGGtatGCTTATTTCTGTGCAAGGAGAATTCAAGAGATTCTCCTTGCACAGGAAATAATTTTTTGct  
cgagctggcgaattcc  
>CD\_NM\_012072.2:680  
CgCctGcgagtctGGtatGCCGTGTGCAAGTTCAGCTTCAATTCAAGAGATTGAAGCTGAACTTGCACACGATTTTTTGct  
cgagctggcgaattcc  
>CD\_NM\_012072.2:1014  
CgCctGcgagtctGGtatGCCGATTCCGGCTGCTGGATGACTTCAAGAGAGTCATCCAGCAGCCGGAATCCTTTTTTGct  
cgagctggcgaattcc  
>CD\_NM\_012072.2:293  
CgCctGcgagtctGGtatGACCAGAACCACTGCAACCAGAATTCAAGAGATTCTGGTTGCAGTGGTTCTGGTTTTTTGct  
cgagctggcgaattcc  
>CD\_NM\_012072.2:1698  
CgCctGcgagtctGGtatGCAGACCTTCGCTGTCTGACTTCAAGAGAGTCAGATGACAGCGAAGGCTATTTTTTGct  
cgagctggcgaattcc  
>CD\_NM\_012072.2:528

CgCctGcgagtctGGtatGATGGCACAAGGAGCTCCGGAAC TTCAAGAGAGTTCCGGAGCTCCTTGTGCCAGTTTTTGct  
cgagctggcgaattcc  
>CD\_NM\_012072.2:2051  
CgCctGcgagtctGGtatGATGAGAGCAGGGCCATGGAGAATTC AAGAGATTCTCCATGGCCCTGCTCTCAGTTTTTGct  
cgagctggcgaattcc  
>CD\_NM\_012072.2:1555  
CgCctGcgagtctGGtatGAGGCCTGTGTCTCTGGGACC ACTTCAAGAGAGTGGTCCCAGAGACACAGGCCCTTTTTTGct  
cgagctggcgaattcc  
>CD\_NM\_012072.2:1167  
CgCctGcgagtctGGtatGACTGGACTGTGTGGACGTGGATTT CAAGAGAATCCACGTCCACACAGTCCAGCTTTTTTGct  
cgagctggcgaattcc  
>CD\_NM\_012072.2:841  
CgCctGcgagtctGGtatGAAGACTCAGAGTCATTATTTCTT CAAGAGAGGAAATAATGACTCTGAGTCTTTTTTGct  
cgagctggcgaattcc  
>CD\_NM\_012072.2:1042  
CgCctGcgagtctGGtatGCCCTGTGCCCTCTCGAAACCCTTTT CAAGAGAAAGGGTTTCGAGAGGCACAGTTTTTTTGct  
cgagctggcgaattcc  
>CD\_NM\_012072.2:351  
CgCctGcgagtctGGtatGAGCCCAGCACGTCCAGCGAGTATT CAAGAGATACTCGCTGGACGTGCTGGGCCTTTTTTGct  
cgagctggcgaattcc  
>CD\_NM\_012072.2:539  
CgCctGcgagtctGGtatGCGCTCCGGAAC TCGTGCATCTCTTCAAGAGAGAGATGCACGAGTTCCGGAGCTTTTTTTGct  
cgagctggcgaattcc  
>CD\_NM\_012072.2:468  
CgCctGcgagtctGGtatGCAGTCTGCCGCTGAAGGGCTTCTT CAAGAGAGAAGCCCTTCAGCGGCAGACTATTTTTTGct  
cgagctggcgaattcc  
>CD\_NM\_012072.2:669  
CgCctGcgagtctGGtatGAATTGAGGGCTTCGTGTGCAAGTT CAAGAGACTTGCACACGAAGCCCTCAATGTTTTTTGct  
cgagctggcgaattcc  
>CD\_NM\_012072.2:1461  
CgCctGcgagtctGGtatGATGCGACAGCTTGTGCTTCAACTT CAAGAGAGTTGAAGCACAAAGCTGTGCAGTTTTTTGct  
cgagctggcgaattcc  
>CD\_NM\_012072.2:548  
CgCctGcgagtctGGtatGCCTCGTGCATCTCCAAGCGCTGTT CAAGAGACAGCGCTTGGAGATGCACGAGTTTTTTTGct  
cgagctggcgaattcc  
>CD\_NM\_012072.2:828  
CgCctGcgagtctGGtatGCGGTGACAAGGACGAGACTCAGTT CAAGAGACTGAGTCTCGTCCTTGTACCTTTTTTTGct  
cgagctggcgaattcc  
>CD\_NM\_012072.2:330  
CgCctGcgagtctGGtatGAACTGTGAAGAGCAAGGAGGAGTT CAAGAGACTCCTCCTTGCTCTTACAGTGTTTTTTGct  
cgagctggcgaattcc  
>CD\_NM\_012072.2:407  
CgCctGcgagtctGGtatGAGGCGAGGATGAGCAAGTTCTGTT CAAGAGACAGAACTTGTTCATCCTCGCCGTTTTTTGct  
cgagctggcgaattcc  
>CD\_NM\_012072.2:603  
CgCctGcgagtctGGtatGACTTCCCAACCGCCTGCCCAAGTT CAAGAGACTTGGGCAGGCGGTTGGGAAGTTTTTTGct  
cgagctggcgaattcc  
>CD\_NM\_012072.2:1303  
CgCctGcgagtctGGtatGATGGATGAGTGTGCTCTGGGTCTT CAAGAGAGACCCAGAGCACACTCATCCACTTTTTTTGct  
cgagctggcgaattcc  
>CD\_NM\_012072.2:793  
CgCctGcgagtctGGtatGACCTTTGCCCTCTGCGGCCAATGTT CAAGAGACATTGGCCGCAGAGGCAAAGGGTTTTTTGct  
cgagctggcgaattcc  
>CD\_NM\_012072.2:2077

CgCctGcgagtctGGtatGCACAGTCCGACACCTGGGACAGTTCAAGAGACTGTCCCAGGTGTCCGACTGTATTTTTGct  
cgagctggcgaattcc  
>CD\_NM\_012072.2:1467  
CgCctGcgagtctGGtatGAAGCTTGTGCTTCAACACACAATTCAAGAGATTGTGTGTTGAAGCACAAGCTGTTTTTGct  
cgagctggcgaattcc  
>CD\_NM\_012072.2:1974  
CgCctGcgagtctGGtatGAAGAGCGAAGAGGGAGGAGAAGTTCAAGAGACTTCTCCTCCCTCTTCGCTCTTTTTTGct  
cgagctggcgaattcc  
>CD\_NM\_012072.2:791  
CgCctGcgagtctGGtatGCGCCCTTTGCCTCTGCGGCCAATTCAAGAGATTGGCCGCAGAGGCAAAGGGCATTTTTTGct  
cgagctggcgaattcc  
>CD\_NM\_002262:462  
CgCctGcgagtctGGtatGCACCGGTGCAACTGTTACTTCATTCAAGAGATGAAGTAACAGTTGCACCGGTATTTTTGct  
cgagctggcgaattcc  
>CD\_NM\_002262:516  
CgCctGcgagtctGGtatGAGGCATCTCTGTGCTTCTCAGATTCAAGAGATCTGAGAAGCACAGAGATGCCGTTTTTGct  
cgagctggcgaattcc  
>CD\_NM\_002262:539  
CgCctGcgagtctGGtatGCTCCAGCCTGCTTCAGCTTCAATTCAAGAGATTGAAGCTGAAGCAGGCTGGATTTTTTGct  
cgagctggcgaattcc  
>CD\_NM\_002262:655  
CgCctGcgagtctGGtatGCTGGCTCTGCACTCTCCAGTATTCAAGAGATACTGGGAGAGTGCAGAGCCATTTTTTGct  
cgagctggcgaattcc  
>CD\_NM\_002262:669  
CgCctGcgagtctGGtatGCCCCAGTATCTATTTCCATCATTTC AAGAGAATGATGGAAATAGATACTGGGATTTTTTGct  
cgagctggcgaattcc  
>CD\_NM\_002262:718  
CgCctGcgagtctGGtatGCAGCGTATAATCCAAATGGAAATTC AAGAGATTTCCATTTGGATTATACGCTATTTTTTGct  
cgagctggcgaattcc  
>CD\_NM\_002262.2:675  
CgCctGcgagtctGGtatGCTCTATTTCCATCATTTCGAACTTC AAGAGAGTTTCAAATGATGGAAATAGATTTTTTGct  
cgagctggcgaattcc  
>CD\_NM\_002262.2:462  
CgCctGcgagtctGGtatGCCCCGGTGCAACTGTTACTTCATTTC AAGAGAATGAAGTAACAGTTGCACCGGTTTTTTGct  
cgagctggcgaattcc  
>CD\_NM\_002262.2:420  
CgCctGcgagtctGGtatGCAGACTCTGACTGCTGTTCTTGTTC AAGAGACAAGAACAGCAGTCAGAGTCTTTTTTGct  
cgagctggcgaattcc  
>CD\_NM\_002262.2:671  
CgCctGcgagtctGGtatGAAGTATCTATTTCCATCATTTCGTTCAAGAGACAAATGATGGAAATAGATACTGTTTTTGct  
cgagctggcgaattcc  
>CD\_NM\_002262.2:273  
CgCctGcgagtctGGtatGCGACCACTCTGTGGAGGTTAATTTCAAGAGAATTAACCTCCACAGAGTGGTCTTTTTTGct  
cgagctggcgaattcc  
>CD\_NM\_002262.2:703  
CgCctGcgagtctGGtatGCACAAAGAACTGCATAGCGTATTTCAAGAGAATACGCTATGCAGTTCTTTGTATTTTTTGct  
cgagctggcgaattcc  
>CD\_NM\_002262.2:665  
CgCctGcgagtctGGtatGATCTCCAGTATCTATTTCCATTTCAAGAGAATGGAAATAGATACTGGGAGAGTTTTTGct  
cgagctggcgaattcc  
>CD\_NM\_002262.2:778  
CgCctGcgagtctGGtatGATGTAAGCAACAGCTCATTTAATTCAAGAGATTAATGAGCTGTTGCTTACAGTTTTTGct  
cgagctggcgaattcc  
>CD\_NM\_002262.2:416

CgCctGcgagtctGGtatGAAGAAAGACTCTGACTGCTGTTTTCAAGAGAAACAGCAGTCAGAGTCTTCTGTTTTTGct  
cgagctggcgaattcc  
>CD\_NM\_002262.2:718  
CgCctGcgagtctGGtatGCGCGTATAATCCAAATGGAAATTTCAAGAGAAATTTCCATTTGGATTATACGCTTTTTTTGct  
cgagctggcgaattcc  
>CD\_NM\_002262.2:519  
CgCctGcgagtctGGtatGCTCTCTGTGCTTCTCAGAAATCTTCAAGAGAGATTTCTGAGAAGCACAGAGATTTTTTTGct  
cgagctggcgaattcc  
>CD\_NM\_002262.2:306  
CgCctGcgagtctGGtatGCAGGGATAATATGCCTTTTCGTTTTCAAGAGAAACGAAAGGCATATTATCCCTATTTTTTGct  
cgagctggcgaattcc  
>CD\_NM\_002262.2:287  
CgCctGcgagtctGGtatGCGGTTAATTTCTGGGACCTTAGTTCAAGAGACTAAGGTCCCAGAAATTAACCTTTTTTTGct  
cgagctggcgaattcc  
>CD\_NM\_002262.2:539  
CgCctGcgagtctGGtatGCCAGCCTGCTTCAGCTTCAAATTTCAAGAGATTTGAAGCTGAAGCAGGCTGGATTTTTTGct  
cgagctggcgaattcc  
>CD\_NM\_002262.2:659  
CgCctGcgagtctGGtatGCCTGCACTCTCCAGTATCTATTTCAAGAGAAATAGATACTGGGAGAGTGCAGATTTTTTGct  
cgagctggcgaattcc  
>CD\_NM\_002262.2:737  
CgCctGcgagtctGGtatGCATGCTTTAGATGAATCCTGTGTTCAAGAGACACAGGATTCATCTAAAGCATTTTTTTGct  
cgagctggcgaattcc  
>CD\_NM\_002262.2:428  
CgCctGcgagtctGGtatGAACTGCTGTTCTTGCCAAGAAATTTCAAGAGATTTCTTGGCAAGAACAGCAGTCTTTTTTGct  
cgagctggcgaattcc  
>CD\_NM\_002262.2:380  
CgCctGcgagtctGGtatGAAGCCAGCATTTACTCCAGGACTTCAAGAGAGTCCCTGGAGTAAATGCTGGCTCTTTTTTGct  
cgagctggcgaattcc  
>CD\_NM\_002262.2:717  
CgCctGcgagtctGGtatGCAGCGTATAATCCAAATGGAAATTTCAAGAGATTTCCATTTGGATTATACGCTATTTTTTGct  
cgagctggcgaattcc  
>CD\_NM\_002262.2:661  
CgCctGcgagtctGGtatGCGCACTCTCCAGTATCTATTTTTTCAAGAGAAAATAGATACTGGGAGAGTGCATTTTTTGct  
cgagctggcgaattcc  
>CD\_NM\_002262.2:425  
CgCctGcgagtctGGtatGCCTGACTGCTGTTCTTGCCAAGTTCAAGAGACTTGGCAAGAACAGCAGTCAGATTTTTTGct  
cgagctggcgaattcc  
>CD\_NM\_002262.2:634  
CgCctGcgagtctGGtatGAACCGCCTGGTTGTGGGAGAATTTCAAGAGAAATTTCTCCACAACCAGGCGGTGTTTTTTGct  
cgagctggcgaattcc  
>CD\_NM\_002262.2:389  
CgCctGcgagtctGGtatGCTTACTCCAGGACCCAACATAGTTCAAGAGACTATGTTGGGTCTTGGAGTAAATTTTTTGct  
cgagctggcgaattcc  
>CD\_NM\_002262.2:711  
CgCctGcgagtctGGtatGCCTGCATAGCGTATAATCCAAATTTCAAGAGATTTGGATTATACGCTATGCAGTTTTTTGct  
cgagctggcgaattcc  
>CD\_NM\_002262.2:713  
CgCctGcgagtctGGtatGCGCATAGCGTATAATCCAAATGTTCAAGAGACATTTGGATTATACGCTATGCATTTTTTGct  
cgagctggcgaattcc  
>CD\_NM\_002262.2:518  
CgCctGcgagtctGGtatGAATCTCTGTGCTTCTCAGAAATTTCAAGAGAAATTTCTGAGAAGCACAGAGATTTTTTTGct  
cgagctggcgaattcc  
>CD\_NM\_002262.2:297

CgCtGcgagtctGGtatGATGGGACCTTAGGGATAATATGTTCAAGAGACATATTATCCCTAAGGTCCCAGTTTTTgct  
cgagctggcgaattcc  
>CD\_NM\_000043.3:1063  
CgCtGcgagtctGGtatGCTGACACTAAGTCAAGTTAAAGTTCAAGAGACTTTAACTTGACTTAGTGTCATTTTTTgct  
cgagctggcgaattcc  
>CD\_NM\_000043.3:655  
CgCtGcgagtctGGtatGCGTAGATTGTGTGATGAAGGACTTCAAGAGAGTCCATTCATCACACAATCTACATTTTTTgct  
cgagctggcgaattcc  
>CD\_NM\_000043.3:970  
CgCtGcgagtctGGtatGCCTCATGAATCTCCAACCTTAATTCAAGAGATTAAGGTTGGAGATTCATGAGATTTTTTgct  
cgagctggcgaattcc  
>CD\_NM\_000043.3:903  
CgCtGcgagtctGGtatGCATTGTTTGGGTGAAGAGAAAGTTCAAGAGACTTCTCTTCACCCAAACAATTTTTTgct  
cgagctggcgaattcc  
>CD\_NM\_000043.3:1272  
CgCtGcgagtctGGtatGCATTCAGACTATCATCCTCAAGTTCAAGAGACTTGAGGATGATAGTCTGAATTTTTTgct  
cgagctggcgaattcc  
>CD\_NM\_000043.3:532  
CgCtGcgagtctGGtatGCGTCCCTCCAGGTGAAAGGAAAGTTCAAGAGACTTCTCTTCACCTGGAGGACATTTTTTgct  
cgagctggcgaattcc  
>CD\_NM\_000043.3:1185  
CgCtGcgagtctGGtatGCTGGCATCAACTTCATGGAAAGTTCAAGAGACTTCCATGAAGTTGATGCCAATTTTTTgct  
cgagctggcgaattcc  
>CD\_NM\_000043.3:1164  
CgCtGcgagtctGGtatGAAAAGTTCAACTGCTTCGTAATTTCAAGAGAATTACGAAGCAGTTGAACTTCTTTTTTgct  
cgagctggcgaattcc  
>CD\_NM\_000043.3:428  
CgCtGcgagtctGGtatGATGACATCAACTCCAAGGGATTTTCAAGAGAAATCCCTTGAGTTGATGTCAGTTTTTgct  
cgagctggcgaattcc  
>CD\_NM\_000043.3:1017  
CgCtGcgagtctGGtatGCTCTGATGTTGACTTGAGTAAATTTCAAGAGATTTACTCAAGTCAACATCAGATTTTTTgct  
cgagctggcgaattcc  
>CD\_NM\_000043.3:754  
CgCtGcgagtctGGtatGCCTACTGTATGTGAACACTGTGTTCAAGAGACACAGTGTTCACATACAGTAGATTTTTTgct  
cgagctggcgaattcc  
>CD\_NM\_000043.3:781  
CgCtGcgagtctGGtatGCGCACCAAATGTGAACATGGAATTTCAAGAGATTCATGTTTACATTTGGTGCATTTTTTgct  
cgagctggcgaattcc  
>CD\_NM\_000043.3:993  
CgCtGcgagtctGGtatGCCCTGAAACAGTGGCAATAAATTTCAAGAGAATTTATTGCCACTGTTTTCAGGATTTTTTgct  
cgagctggcgaattcc  
>CD\_NM\_000043.3:1119  
CgCtGcgagtctGGtatGCATAGATGAGATCAAGAATGACTTCAAGAGAGTCATTCTTGATCTCATCTATTTTTTgct  
cgagctggcgaattcc  
>CD\_NM\_000043.3:689  
CgCtGcgagtctGGtatGCGGAAATAAAGTGCACCCGGACTTCAAGAGAGTCCGGGTGCAGTTTATTTCCATTTTTTgct  
cgagctggcgaattcc  
>CD\_NM\_000043.3:379  
CgCtGcgagtctGGtatGATTACGTCTGTTGCTAGATTATTTCAAGAGAATAATCTAGCAACAGACGTAAGTTTTTgct  
cgagctggcgaattcc  
>CD\_NM\_000043.3:769  
CgCtGcgagtctGGtatGAACTGTGACCTTGACCAAATTTCAAGAGAATTTGGTGCAAGGGTCACAGTTTTTTgct  
cgagctggcgaattcc  
>CD\_NM\_000043.3:995

CgCtGcgagtctGGtatGATGAAACAGTGGCAATAAATTTTTCAAGAGAAAATTTATTGCCACTGTTTCAGTTTTTGct  
cgagctggcgaattcc  
>CD\_NM\_000043.3:678  
CgCtGcgagtctGGtatGCGGCTTAGAAGTGAAATAAACTTCAAGAGAGTTTATTTCCACTTCTAAGCATTTTTTGct  
cgagctggcgaattcc  
>CD\_NM\_000043.3:454  
CgCtGcgagtctGGtatGCTGAGGAAGACTGTTACTACAGTTCAAGAGACTGTAGTAACAGTCTTCTCAATTTTTGct  
cgagctggcgaattcc  
>CD\_NM\_000043.3:1215  
CgCtGcgagtctGGtatGATATGACACATTGATTAAGATTTCAAGAGAATCTTTAATCAATGTGTCATACTTTTGct  
cgagctggcgaattcc  
>CD\_NM\_000043.3:961  
CgCtGcgagtctGGtatGCACCAAGGTCTCATGAATCTTTCAAGAGAGATTTCATGAGAACCTTGGTTTTTTGct  
cgagctggcgaattcc  
>CD\_NM\_000043.3:899  
CgCtGcgagtctGGtatGAACTAATTGTTGGGTGAAGAGTTCAAGAGACTTTCACCCAAACAATTAGTGTTTTTGct  
cgagctggcgaattcc  
>CD\_NM\_000043.3:1092  
CgCtGcgagtctGGtatGCCGAAAGAAATGGTGTCAATGAATTTCAAGAGATTTCATTGACACCATTCTTTCGATTTTTGct  
cgagctggcgaattcc  
>CD\_NM\_000043.3:868  
CgCtGcgagtctGGtatGAGGTGGCTTTGTCTTCTTTTTCAAGAGAAAAGAAGAAGACAAAGCCACCCTTTTTGct  
cgagctggcgaattcc  
>CD\_NM\_000043.3:1211  
CgCtGcgagtctGGtatGCAGCGTATGACACATTGATTAATTTCAAGAGATTAATCAATGTGTCATACGCTTTTTTTGct  
cgagctggcgaattcc  
>CD\_NM\_000043.3:526  
CgCtGcgagtctGGtatGCAGCCCTGTCTCCAGGTGAAATTTCAAGAGATTTACCTGGAGGACAGGGCTTTTTTTGct  
cgagctggcgaattcc  
>CD\_NM\_000043.3:1326  
CgCtGcgagtctGGtatGAAGAAATGAAATCCAAAGCTTGTTCAGAGACAAGCTTTGGATTTCAATTTCTGTTTTGct  
cgagctggcgaattcc  
>CD\_NM\_000043.3:1189  
CgCtGcgagtctGGtatGAATCAACTTCATGAAAGAAAGTTCAAGAGACTTCTTTCCATGAAGTTGATGTTTTTGct  
cgagctggcgaattcc  
>CD\_NM\_000043.3:816  
CgCtGcgagtctGGtatGAACACTCACCAGCAACACCAAGTTCAAGAGACTTGGTGTGCTGGTGAGTGTTTTTGct  
cgagctggcgaattcc  
>CD\_NM\_000043.3:551  
CgCtGcgagtctGGtatGCAGCTAGGGACTGCACAGTCAATTTCAAGAGATTGACTGTGCAGTCCCTAGCTTTTTTTGct  
cgagctggcgaattcc  
>CD\_NM\_000043.3:982  
CgCtGcgagtctGGtatGACAACCTTAAATCCTGAAACAGTTCAAGAGACTGTTTCAGGATTTAAGGTTGGTTTTGct  
cgagctggcgaattcc  
>CD\_NM\_000043.3:702  
CgCtGcgagtctGGtatGAACCCGACCCAGAATACCAAGTTCAAGAGACTTGGTATTCTGGGTCCGGGTGTTTTGct  
cgagctggcgaattcc  
>CD\_NM\_005816:252  
CgCtGcgagtctGGtatGCTGAAATACTGTGCTGTCTATTTCAAGAGAATAGACAGCACAGTATTTCCATTTTTGct  
cgagctggcgaattcc  
>CD\_NM\_005816:1096  
CgCtGcgagtctGGtatGCGAAGATTTACCTGCTTACTAATTTCAAGAGATTAGTAAGCAGGTAAATCTTTTTGct  
cgagctggcgaattcc  
>CD\_NM\_005816:1077



CgCctGcgagtctGGtatGAACGGATGTCTTGGTAGAGAGATTCAAGAGATCTCTCTACCAAGACATCCGTGTTTTTGct  
cgagctggcgaattcc  
>CD\_NM\_005816:877  
CgCctGcgagtctGGtatGCTCAGCAATCCACATTACTTATTCAAGAGATAAGTAATGTGGAATTGCTGATTTTTTGct  
cgagctggcgaattcc  
>CD\_NM\_005816:964  
CgCctGcgagtctGGtatGAGGCGGAAGTTCTCTTGCCACATTCAAGAGATGTGGCAAGAGAACTTCCGCCTTTTTGct  
cgagctggcgaattcc  
>CD\_NM\_005816:1104  
CgCctGcgagtctGGtatGCACCTGCTTACTAAAGAATGTATTCAAGAGATACATTCTTTAGTAAGCAGGTATTTTTGct  
cgagctggcgaattcc  
>CD\_NM\_005816:1449  
CgCctGcgagtctGGtatGAAGCAGTGTATCTCCTGCAAGATTCAAGAGATCTTGCAGGAGATACACTGCTTTTTGct  
cgagctggcgaattcc  
>CD\_NM\_198196.1:1449  
CgCctGcgagtctGGtatGCGCAGTGTATCTCCTGCAAGATTTCAAGAGAATCTTGCAGGAGATACACTGCTTTTTGct  
cgagctggcgaattcc  
>CD\_NM\_198196.1:510  
CgCctGcgagtctGGtatGCTCACAGAACTCCTGAGAATGTTCAAGAGACATTCTCAGGAGTTTCTGTGAATTTTTGct  
cgagctggcgaattcc  
>CD\_NM\_198196.1:1760  
CgCctGcgagtctGGtatGAACTGGTATTGTGGTCAATAAGTTCAAGAGACTTATTGACCACAATACCAGTTTTTGct  
cgagctggcgaattcc  
>CD\_NM\_198196.1:252  
CgCctGcgagtctGGtatGCGGAAATACTGTGCTGTCTATTTTTCAAGAGAAATAGACAGCACAGTATTTCCATTTTTGct  
cgagctggcgaattcc  
>CD\_NM\_198196.1:1398  
CgCctGcgagtctGGtatGACTCCACTGAGTGTTACAGAATTTCAAGAGAATCTGTAACTCAGTGGAGTTTTGct  
cgagctggcgaattcc  
>CD\_NM\_198196.1:805  
CgCctGcgagtctGGtatGAGGTCTTCTTTCTAAGGGTATTTCAAGAGAATACCCTTAGAAAGAAGGACCTTTTTGct  
cgagctggcgaattcc  
>CD\_NM\_198196.1:941  
CgCctGcgagtctGGtatGCCAGTCCAAATCTTCGATGATTTCAAGAGAATCATCGAAGATTTGGACTGGATTTTTGct  
cgagctggcgaattcc  
>CD\_NM\_198196.1:487  
CgCctGcgagtctGGtatGAACCTGTGAGTCACTTGTGACTTCAAGAGAGTCACAAGTGACTCACAGGGTCTTTTTGct  
cgagctggcgaattcc  
>CD\_NM\_198196.1:1534  
CgCctGcgagtctGGtatGCACCCAGCAATTCAGTATGACTTCAAGAGAGTCATACTGGAATTGCTGGGTTTTTTGct  
cgagctggcgaattcc  
>CD\_NM\_198196.1:1073  
CgCctGcgagtctGGtatGATCCACGGATGTCCTTGGTAGAGTTCAAGAGACTCTACCAAGACATCCGTGGAGTTTTGct  
cgagctggcgaattcc  
>CD\_NM\_198196.1:608  
CgCctGcgagtctGGtatGCCAGAGGGCATTCAAGACTAAATTTCAAGAGATTTAGTCTGAATGCCCTCTGGATTTTTGct  
cgagctggcgaattcc  
>CD\_NM\_198196.1:491  
CgCctGcgagtctGGtatGATGTGAGTCACTTGTGACTTTCTTCAAGAGAGAAAGTCACAAGTGACTCACAGTTTTGct  
cgagctggcgaattcc  
>CD\_NM\_198196.1:640  
CgCctGcgagtctGGtatGCTCTCATTGAGACACACGTTACTTCAAGAGAGTAACGTGTGTCTGAATGAGAATTTTTGct  
cgagctggcgaattcc  
>CD\_NM\_198196.1:1096

CgCctGcgagtctGGtatGAAAGATTTACCTGCTTACTAAATTCAAGAGATTTAGTAAGCAGGTAAATCTTCTTTTTTGct  
cgagctggcgaattcc  
>CD\_NM\_198196.1:1836  
CgCctGcgagtctGGtatGCTGATATTGTTTGGTCTTGGAGTTCAAGAGACTCCAAGACCAAACAATATCATTTTTTGct  
cgagctggcgaattcc  
>CD\_NM\_198196.1:930  
CgCctGcgagtctGGtatGATCCACCTCTCTCCAGTCCAAATTCAAGAGATTTGGACTGGAGAGAGGTGGAGTTTTTGct  
cgagctggcgaattcc  
>CD\_NM\_198196.1:1305  
CgCctGcgagtctGGtatGCTGGCTCTGTCTCCAGTCCCAGTTCAAGAGACTGGGACTGGAGACAGAGCCATTTTTTGct  
cgagctggcgaattcc  
>CD\_NM\_198196.1:1366  
CgCctGcgagtctGGtatGCTCTCTTAGGTTCTGAAATTTCTTCAAGAGAGAAATTCAGAACCTAAGAGAATTTTTGct  
cgagctggcgaattcc  
>CD\_NM\_198196.1:1573  
CgCctGcgagtctGGtatGCTCCCTGGACCTCCAGTGGGACTTCAAGAGAGTCCCCTGGAGGTCCAGGGATTTTTTGct  
cgagctggcgaattcc  
>CD\_NM\_198196.1:662  
CgCctGcgagtctGGtatGCGCAGATGAATGGAACAGCAACTTCAAGAGAGTTGCTGTTCCATTCATCTGCTTTTTTGct  
cgagctggcgaattcc  
>CD\_NM\_198196.1:263  
CgCctGcgagtctGGtatGCGCTGTCTATTACATCATCCAGTTCAAGAGACTGGATGATGTAATAGACAGCATTTTTTGct  
cgagctggcgaattcc  
>CD\_NM\_198196.1:1116  
CgCctGcgagtctGGtatGCAGAATGTATTTCCCAAAGCAATTCAAGAGATTGCTTTGGGAAATACATTCTTTTTTTGct  
cgagctggcgaattcc  
>CD\_NM\_198196.1:885  
CgCctGcgagtctGGtatGCCACATTACTTAAAGATAGAGTTCAAGAGACTCTATCTTTAAGTAATGTGGATTTTTTGct  
cgagctggcgaattcc  
>CD\_NM\_198196.1:483  
CgCctGcgagtctGGtatGAGGAGACCCCTGTGAGTCACTTGTTCAGAGACAAGTACTCACAGGGTCTCCCTTTTTTGct  
cgagctggcgaattcc  
>CD\_NM\_198196.1:1484  
CgCctGcgagtctGGtatGCTCAGTGACCCCTGTAGATGTGTTCAAGAGACACATCTACAAGGGTCACTGAATTTTTTGct  
cgagctggcgaattcc  
>CD\_NM\_198196.1:1132  
CgCctGcgagtctGGtatGCAGCAAATATCACATGGTTTTATTTCAAGAGAATAAACCATGTGATATTTGCTTTTTTTTGct  
cgagctggcgaattcc  
>CD\_NM\_001784:877  
CgCctGcgagtctGGtatGCAGGACACTGTCTGTGAAGATATTCAAGAGATATCTTCACAGACAGTGTCCTTTTTTTGct  
cgagctggcgaattcc  
>CD\_NM\_001784:943  
CgCctGcgagtctGGtatGCCGCTTTCCCGATTCTTCGACATTCAAGAGATGTCGAAGAATCGGGAAAGCGTTTTTTTGct  
cgagctggcgaattcc  
>CD\_NM\_001784:1011  
CgCctGcgagtctGGtatGAACCATCCAGAATGTCATCAAATTCAAGAGATTTGATGACATTCTGGATGGTGTTTTTTGct  
cgagctggcgaattcc  
>CD\_NM\_001784:1111  
CgCctGcgagtctGGtatGATGCTCTCAAACCTTGAAGATATTCAAGAGATATCTTCAAGGTTTGAGAGCAGTTTTTGct  
cgagctggcgaattcc  
>CD\_NM\_001784:2021  
CgCctGcgagtctGGtatGCAGGCCTGGAGCTCTACTTTCTTTTCAAGAGAAGAAAGTAGAGCTCCAGGCCTTTTTTTGct  
cgagctggcgaattcc  
>CD\_NM\_001784:2408

CgCctGcgagtctGGtatGCTCGGAGCTTGGTGCTGACCTATTCAAGAGATAGGTCAGCACCAAGCTCCGATTTTTTgct  
cgagctggcgaattcc  
>CD\_NM\_078481.2:877  
CgCctGcgagtctGGtatGCGGACACTGTCTGTGAAGATATTTCAAGAGAATATCTTCACAGACAGTGCCTTTTTTgct  
cgagctggcgaattcc  
>CD\_NM\_078481.2:1013  
CgCctGcgagtctGGtatGAATCCAGAATGTCATCAAATTGTTCAAGAGACAATTTGATGACATTCTGGATGTTTTTgct  
cgagctggcgaattcc  
>CD\_NM\_078481.2:976  
CgCctGcgagtctGGtatGCGGGCAGAGACTCCAAGACAAGTTCAAGAGACTTGTCTTGGAGTCTCTGCCATTTTTTgct  
cgagctggcgaattcc  
>CD\_NM\_078481.2:787  
CgCctGcgagtctGGtatGACTCCACCGTCTGCTTCAACACTTCAAGAGAGTGTGAAGCAGACGGTGGAGCTTTTTTgct  
cgagctggcgaattcc  
>CD\_NM\_078481.2:1364  
CgCctGcgagtctGGtatGATCCTTGAACCTGCATTCCAAGTTCAAGAGACTTGAATGCAGGTTCAAGGAGTTTTTgct  
cgagctggcgaattcc  
>CD\_NM\_078481.2:1318  
CgCctGcgagtctGGtatGAGGGCATCCTCTCCATCCAGAATTCAGAGATTCTGGATGGAGAGGATGCCGTTTTTgct  
cgagctggcgaattcc  
>CD\_NM\_078481.2:2081  
CgCctGcgagtctGGtatGATGGCTCTGCCTGATCGGCTATTTCAAGAGAATAGCCGATCAGGCAGAGCCAGTTTTTgct  
cgagctggcgaattcc  
>CD\_NM\_078481.2:1804  
CgCctGcgagtctGGtatGACCTGCTGTGTGCATCCTCACTTCAAGAGAGTGAGGATGCACAGCAGCAGGCTTTTTTgct  
cgagctggcgaattcc  
>CD\_NM\_078481.2:334  
CgCctGcgagtctGGtatGAGTCGAAAGTGTGCATGCGGAAATTCAGAGATTTCCGCATGACACTTTCGACGTTTTTgct  
cgagctggcgaattcc  
>CD\_NM\_078481.2:2474  
CgCctGcgagtctGGtatGACTGCACTGCCTGCTCAACAAGTTCAAGAGACTTGTGAGCAGGCAGTGCAGCTTTTTTgct  
cgagctggcgaattcc  
>CD\_NM\_078481.2:560  
CgCctGcgagtctGGtatGCGGCTTCAAGTTCATACCTGAGTTCAAGAGACTCAGGTATGAACTGAAGCCATTTTTTgct  
cgagctggcgaattcc  
>CD\_NM\_078481.2:1600  
CgCctGcgagtctGGtatGCGCTCTGTGCCCTTCTGGAAGAGTTCAAGAGACTCTTCCAGAAGGCACAGAGCATTTTTTgct  
cgagctggcgaattcc  
>CD\_NM\_078481.2:1733  
CgCctGcgagtctGGtatGAGCTCATTATGACGTGGAGGACTTCAAGAGAGTCTCCACGTCATAATGAGCCTTTTTTgct  
cgagctggcgaattcc  
>CD\_NM\_078481.2:1993  
CgCctGcgagtctGGtatGCGGCCGCCTTCTGCTGGATGAGTTCAAGAGACTCATCCAGCAGAAGGCGGCCATTTTTTgct  
cgagctggcgaattcc  
>CD\_NM\_078481.2:1100  
CgCctGcgagtctGGtatGCGCCACCCAGCTGCTCTCAAACCTTCAAGAGAGTTTGAAGCAGCTGGGTGGCTTTTTTgct  
cgagctggcgaattcc  
>CD\_NM\_078481.2:459  
CgCctGcgagtctGGtatGCCCTGTCAAGATGTGGACGAATTTCAAGAGAATTCGTCCACATCTTGACAGGTTTTTgct  
cgagctggcgaattcc  
>CD\_NM\_078481.2:2300  
CgCctGcgagtctGGtatGCCCAGACATGAAGAAATTAAGTTCAAGAGACTTTAATTTCTTCATGTCTGGATTTTTTgct  
cgagctggcgaattcc  
>CD\_NM\_078481.2:851

CgCtGcgagtctGGtatGAAGACACGGAATCCCGAATAACTTCAAGAGAGTTATTCGGGATTCCGTGTCTGTTTTTGct  
cgagctggcgaattcc  
>CD\_NM\_078481.2:355  
CgCtGcgagtctGGtatGCATTCTCGGACTGCTGGAACACTTCAAGAGAGTGTTCAGCAGTCCGAGAATTTTTTTGct  
cgagctggcgaattcc  
>CD\_NM\_078481.2:553  
CgCtGcgagtctGGtatGACCTGCCTGGCTTCAAGTTCATTTCAAGAGAATGAACCTGAAGCCAGGCAGGCTTTTTTGct  
cgagctggcgaattcc  
>CD\_NM\_078481.2:1460  
CgCtGcgagtctGGtatGATCCATCTTTCTGAGCCACAACCTTCAAGAGAGTGTGGCTCAGAAAGATGGAGTTTTTTGct  
cgagctggcgaattcc  
>CD\_NM\_078481.2:1111  
CgCtGcgagtctGGtatGCGCTCTCAAACCTTGAAGATATTTCAAGAGAATATCTTCAAGGTTTGAAGCATTTTTTGct  
cgagctggcgaattcc  
>CD\_NM\_078481.2:725  
CgCtGcgagtctGGtatGACCAAACAATACCGTCTGTGAATTCAAGAGATTCACAGACGGTATTGTTGGGTTTTTTGct  
cgagctggcgaattcc  
>CD\_NM\_078481.2:2573  
CgCtGcgagtctGGtatGATCTGGCACTGGCCACAATCAGTTCAGAGACTGATTGTGGCCAGTGCCAGACTTTTTTGct  
cgagctggcgaattcc  
>CD\_NM\_078481.2:1888  
CgCtGcgagtctGGtatGACCTCTTCGTGGGCTCCACCATTTCAAGAGAATGGTGGAGCCCACGAAGAGGCTTTTTTGct  
cgagctggcgaattcc  
>CD\_NM\_078481.2:1234  
CgCtGcgagtctGGtatGCCGTCACTATGGGTGAGAGCAGTTCAGAGACTGCTCTGACCCATAGTGACGTTTTTTGct  
cgagctggcgaattcc  
>CD\_NM\_078481.2:1121  
CgCtGcgagtctGGtatGACTTGAAGATATCATGAGGATCTTCAAGAGAGATCCTCATGATATCTTCAAGGTTTTTTGct  
cgagctggcgaattcc  
>CD\_NM\_002394:717  
CgCtGcgagtctGGtatGCCCTGGCGGGAGCCGAGAAGATTCAGAGATCTTCTCGGCTCCCGCCAGGATTTTTTGct  
cgagctggcgaattcc  
>CD\_NM\_002394:1086  
CgCtGcgagtctGGtatGCAGGGCCTTGTGCTGGGTCCAATTCAGAGATTTGACCCAGCACAAAGCCCTTTTTTTGct  
cgagctggcgaattcc  
>CD\_NM\_002394:1350  
CgCtGcgagtctGGtatGCTCCAGGTTCCGGACATAGAGATTCAGAGATCTCTATGTCCCGAACCTGGAATTTTTTGct  
cgagctggcgaattcc  
>CD\_NM\_002394:1479  
CgCtGcgagtctGGtatGCTCCTGAGCCTACTCGAATCCATTCAGAGATGGATTCGAGTAGGCTCAGGATTTTTTTGct  
cgagctggcgaattcc  
>CD\_NM\_002394:1956  
CgCtGcgagtctGGtatGAGGCCTGGACTCTTCTCCTATATTCAAGAGATATAGGAGAAGAGTCCAGGCCCTTTTTTGct  
cgagctggcgaattcc  
>CD\_NM\_001012661.1:539  
CgCtGcgagtctGGtatGATTAGCCAGGCTGATATTGAATTTCAAGAGAATTCATATCAGCCTGGCTAACTTTTTTGct  
cgagctggcgaattcc  
>CD\_NM\_001012661.1:2152  
CgCtGcgagtctGGtatGCCGCCTGAACTGGAGCCTCACTTCAAGAGAGTGGAGCTCCAGTTTCAGGCGTTTTTTGct  
cgagctggcgaattcc  
>CD\_NM\_001012661.1:1529  
CgCtGcgagtctGGtatGATGTCTGATTCTGGTCTACTGTTCAAGAGACAGTAGAACCAGAATCAGACAGTTTTTTGct  
cgagctggcgaattcc  
>CD\_NM\_001012661.1:1512

CgCtGcgagtctGGtatGCGTTGACTAGCTCATACTGTCTTCAAGAGAGACAGGTATGAGCTAGTCAACATTTTTGct  
cgagctggcgaattcc  
>CD\_NM\_001012661.1:590  
CgCtGcgagtctGGtatGACCTCCGGAAGTGCTGGGATTATTCAAGAGATAATCCAGCACTTCCGGAGCCTTTTTGct  
cgagctggcgaattcc  
>CD\_NM\_001012661.1:1956  
CgCtGcgagtctGGtatGAGCCTGGACTCTTCTCCTATATTTCAAGAGAATATAGGAGAAGAGTCCAGGCCTTTTTGct  
cgagctggcgaattcc  
>CD\_NM\_001012661.1:1216  
CgCtGcgagtctGGtatGAAGCATCCGTGTCATTCTGGACTTCAAGAGAGTCCAGAATGACACGGATGCTTTTTGct  
cgagctggcgaattcc  
>CD\_NM\_001012661.1:1825  
CgCtGcgagtctGGtatGCAGTGCCAACATGACTGTGAAGTTCAAGAGACTTACAGTCATGTTGGCACTTTTTGct  
cgagctggcgaattcc  
>CD\_NM\_001012661.1:1138  
CgCtGcgagtctGGtatGAACTGACTTGCTGCAGATCGACTTCAAGAGAGTCGATCTGCAGCAAGTCAGTCTTTTTGct  
cgagctggcgaattcc  
>CD\_NM\_001012661.1:1837  
CgCtGcgagtctGGtatGAACTGTGAAGGGCCAGAGTGAATTCAAGAGATTCACCTCTGGCCCTTACAGTCTTTTTGct  
cgagctggcgaattcc  
>CD\_NM\_001012661.1:1282  
CgCtGcgagtctGGtatGAGTTGACACTGTGGCCACCAAGTTCAAGAGACTTGGTGGCCACAGTGTCAACCTTTTTGct  
cgagctggcgaattcc  
>CD\_NM\_001012661.1:446  
CgCtGcgagtctGGtatGATTACCCAGGCTGGTCTTCAACTTCAAGAGAGTTGAAGACCAGCCTGGGTAACTTTTGct  
cgagctggcgaattcc  
>CD\_NM\_001012661.1:406  
CgCtGcgagtctGGtatGCTCCCAGAATGCCGAGATGATATTCAAGAGATATCATCTCGGCATTCTGGGAATTTTTGct  
cgagctggcgaattcc  
>CD\_NM\_001012661.1:907  
CgCtGcgagtctGGtatGCGCTGGTGCCGTGGTCATAATCTTCAAGAGAGATTATGACCACGGCACCAGCATTTTTTGct  
cgagctggcgaattcc  
>CD\_NM\_001012661.1:1611  
CgCtGcgagtctGGtatGACTGGAGTTGTCTCAGGCAAGTTCAAGAGACTTGCCTGAGACAACTCCAGCTTTTTGct  
cgagctggcgaattcc  
>CD\_NM\_001012661.1:1861  
CgCtGcgagtctGGtatGACCTGGCTCCCTCCTTTTCTTGTTCAGGACAAGGAAAGGAGGGAGCCAGGGTTTTGct  
cgagctggcgaattcc  
>CD\_NM\_001012661.1:1132  
CgCtGcgagtctGGtatGAGCTCAGACTGACTTGCTGCAGTTCAAGAGACTGCAGCAAGTCAGTCTGAGCGTTTTGct  
cgagctggcgaattcc  
>CD\_NM\_001012661.1:1072  
CgCtGcgagtctGGtatGATCTCTGAAGGTGAAGGGCCTTTTCAAGAGAAAGGCCCTTACCTTACAGAGATTTTTGct  
cgagctggcgaattcc  
>CD\_NM\_001012661.1:476  
CgCtGcgagtctGGtatGCCAAGTGATCCTCCTGCCTTAGTTCAAGAGACTAAGGCAGGAGGATCACTTGATTTTTGct  
cgagctggcgaattcc  
>CD\_NM\_001012661.1:1774  
CgCtGcgagtctGGtatGCCAGTCATGCTGTGGGATGAGTTCAAGAGACTCATCCCACAGCATGACTGGATTTTTGct  
cgagctggcgaattcc  
>CD\_NM\_001012661.1:1654  
CgCtGcgagtctGGtatGAGCTCAACTTCTCCGACTCTACTTCAAGAGAGTAGAGTCGGAGAAGTTGAGCCTTTTTGct  
cgagctggcgaattcc  
>CD\_NM\_001012661.1:1954

CgCctGcgagtctGGtatGCGGGCCTGGACTCTTCTCCTATTTCAAGAGAATAGGAGAAGAGTCCAGGCCATTTTTGct  
cgagctggcgaattcc  
>CD\_NM\_001012661.1:1796  
CgCctGcgagtctGGtatGCCAGCTTCCCTGACATCCCAGTTCAAGAGACTGGGATGTCAGGGAAGCTGGATTTTTGct  
cgagctggcgaattcc  
>CD\_NM\_001012661.1:982  
CgCctGcgagtctGGtatGAGCCCTCTACCGCATCGGCGACTTCAAGAGAGTCGCCGATGCGGTAGAGGGCGTTTTGct  
cgagctggcgaattcc  
>CD\_NM\_001012661.1:673  
CgCctGcgagtctGGtatGACCCGAGAAGCAGCCGATGAACTTCAAGAGAGTTCATCGGCTGCTTCTCGGGCTTTTTGct  
cgagctggcgaattcc  
>CD\_NM\_001012661.1:353  
CgCctGcgagtctGGtatGATTGCCAGACTGGTCTCGAACTTCAAGAGAGTTCGAGACCAGTCTGGGCAACTTTTTGct  
cgagctggcgaattcc  
>CD\_NM\_001012661.1:1066  
CgCctGcgagtctGGtatGACTGAGCTCTCTGAAGGTGAAGTTCAAGAGACTTCACCTCAGAGAGCTCAGTTTTGct  
cgagctggcgaattcc  
>CD\_NM\_001012661.1:377  
CgCctGcgagtctGGtatGCTGGCCTCAGGTGATCCTCTTCTTCAAGAGAGAAGAGGATCACCTGAGGCCAATTTTTGct  
cgagctggcgaattcc  
>CD\_XM\_175147:664  
CgCctGcgagtctGGtatGATGGACATGGAGAGCCACCGATTCAAGAGATCCGGTGGCTCTCCATGTCCACTTTTTGct  
cgagctggcgaattcc  
>CD\_NM\_002414:236  
CgCctGcgagtctGGtatGACCCGGATGGTGGTTTTCGATTTTTCAAGAGAAAATCGAAACCACCATCCGGGGTTTTGct  
cgagctggcgaattcc  
>CD\_NM\_002414:386  
CgCctGcgagtctGGtatGCCCCACCCAAACCGATGCCAAATTCAGAGATTTGGCATCGGTTTGGGTGGTTTTTTGct  
cgagctggcgaattcc  
>CD\_NM\_002414:390  
CgCctGcgagtctGGtatGCCCCAAACCGATGCCAAATCCATTCAAGAGATGGATTTGGCATCGGTTTGGGTTTTTTTGct  
cgagctggcgaattcc  
>CD\_XM\_175147:670  
CgCctGcgagtctGGtatGCTGGAGAGCCACCGAATGCCATTCAAGAGATGGCATTCGGTGGCTCTCCATTTTTTTGct  
cgagctggcgaattcc  
>CD\_NM\_002414.3:386  
CgCctGcgagtctGGtatGACCACCCAAACCGATGCCAAATTTCAAGAGAATTTGGCATCGGTTTGGGTGGTTTTTTGct  
cgagctggcgaattcc  
>CD\_NM\_002414.3:418  
CgCctGcgagtctGGtatGCCACCCCTAGTTCCTCCGGTAGTTCAAGAGACTACCGGAGGAACTAGGGTGGTTTTTTGct  
cgagctggcgaattcc  
>CD\_NM\_002414.3:443  
CgCctGcgagtctGGtatGCTCAGATGCTGACCTTGCAGATTTCAAGAGAAATCCGCAAGGTCAGCATCTGAATTTTTGct  
cgagctggcgaattcc  
>CD\_NM\_002414.3:596  
CgCctGcgagtctGGtatGAATCTCTAGCTTCATTGCTTACTTCAAGAGAGTAAGCAATGAAGCTAGAGATGTTTTGct  
cgagctggcgaattcc  
>CD\_NM\_002414.3:342  
CgCctGcgagtctGGtatGAATGCTGTTGTTGATGGAGAAATTCAGAGATTTCTCCATCAACAACAGCATTTTTTTGct  
cgagctggcgaattcc  
>CD\_NM\_002414.3:257  
CgCctGcgagtctGGtatGCTCCGATGCCCTTCTGACAATTTCAAGAGAATGTCAGGAAGGGCATCGGATTTTTTTGct  
cgagctggcgaattcc  
>CD\_NM\_002414.3:188

CgCtGcgagtctGGtatGCGCGCTGGCGCTGCTGCTCTTCTTCAAGAGAGAAGAGCAGCAGCGCCAGCGCATT TTTTGct  
cgagctggcgaattcc  
>CD\_NM\_002414.3:333  
CgCtGcgagtctGGtatGAACTTAGGAGATGCTGTTGTTGTTCAAGAGACAACAACAGCATCTCCTAAGTCT TTTTGct  
cgagctggcgaattcc  
>CD\_NM\_002414.3:249  
CgCtGcgagtctGGtatGCTCGATTTATCCGATGCCCTTCTTCAAGAGAGAAGGGCATCGGATAAATCGAAT TTTTGct  
cgagctggcgaattcc  
>CD\_NM\_002414.3:261  
CgCtGcgagtctGGtatGAATGCCCTTCTTGACAATGAAATTC AAGAGATTCATTGTCAGGAAGGGCATCTTTTGct  
cgagctggcgaattcc  
>CD\_NM\_002414.3:589  
CgCtGcgagtctGGtatGATGGAGCCATCTCTAGCTTCATTTCAAGAGAATGAAGCTAGAGATGGCTCCAG TTTTGct  
cgagctggcgaattcc  
>CD\_NM\_002414.3:465  
CgCtGcgagtctGGtatGAGCGTTTCAGGTGGAGAAGGAATTC AAGAGATTCCTTCTCCACCTGAAACGCCTTTTTGct  
cgagctggcgaattcc  
>CD\_NM\_002414.3:236  
CgCtGcgagtctGGtatGACCGGATGGTGGTTTCGATTTATTCAAGAGATAAATCGAAACCACCATCCGGG TTTTGct  
cgagctggcgaattcc  
>CD\_NM\_002414.3:258  
CgCtGcgagtctGGtatGCCCGATGCCCTTCTTGACAATGTTCAAGAGACATTTGTCAGGAAGGGCATCGG ATTTTGct  
cgagctggcgaattcc  
>CD\_NM\_002414.3:254  
CgCtGcgagtctGGtatGCTTATCCGATGCCCTTCTGACTTCAAGAGAGTCAGGAAGGGCATCGGATAAAT TTTTGct  
cgagctggcgaattcc  
>CD\_NM\_002414.3:501  
CgCtGcgagtctGGtatGAGTGGAGGCAGCCACAGGAAAGTTCAAGAGACTTCTCTGTGGCTGCCTCCACCT TTTTGct  
cgagctggcgaattcc  
>CD\_NM\_002414.3:624  
CgCtGcgagtctGGtatGCAGAAGCTATGCTTCAAAGAAATTC AAGAGATTTCTTTGAAGCATAGCTTCTTTTTTTGct  
cgagctggcgaattcc  
>CD\_NM\_002414.3:670  
CgCtGcgagtctGGtatGCGGAGAGCCACCGGAATGCCAATTC AAGAGATTTGGCATTCCGGTGGCTCTCCATTTTGct  
cgagctggcgaattcc  
>CD\_NM\_002414.3:486  
CgCtGcgagtctGGtatGCAAGGAGGCAGTGATGGTGGAGTTCAAGAGACTCCACCATCACTGCCTCCTTT TTTTTTGct  
cgagctggcgaattcc  
>CD\_NM\_002414.3:583  
CgCtGcgagtctGGtatGACGTGGCTGGAGCCATCTCTAGTTCAAGAGACTAGAGATGGCTCCAGCCACGG TTTTTGct  
cgagctggcgaattcc  
>CD\_NM\_002414.3:462  
CgCtGcgagtctGGtatGAATGGCGTTTCAGGTGGAGAAGTTCAAGAGACTTCTCCACCTGAAACGCCATCT TTTTGct  
cgagctggcgaattcc  
>CD\_NM\_002414.3:323  
CgCtGcgagtctGGtatGAGATGACTTTGACTTAGGAGATTTCAAGAGAATCTCCTAAGTCAAAGTCATCT TTTTGct  
cgagctggcgaattcc  
>CD\_NM\_002414.3:466  
CgCtGcgagtctGGtatGACGTTTCAGGTGGAGAAGGAATTC AAGAGATTTCTTCTCCACCTGAAACGCCTTTTTGct  
cgagctggcgaattcc  
>CD\_NM\_002414.3:369  
CgCtGcgagtctGGtatGAACCCACGACCACCGAACCCTTCAAGAGAGTGGGTTCCGGTGGTTCGTGGGTCT TTTTGct  
cgagctggcgaattcc  
>CD\_NM\_002414.3:336

CgCtGcgagtctGGtatGCTAGGAGATGCTGTTGTTGATGTTCAAGAGACATCAACAACAGCATCTCCTAATTTTTGct  
cgagctggcgaattcc  
>CD\_NM\_002414.3:503  
CgCtGcgagtctGGtatGCGGAGGCAGCCACAGGAAAGAATTCAGAGATCTTTCTGTGGCTGCCTCATTTTTTGct  
cgagctggcgaattcc  
>CD\_NM\_002414.3:601  
CgCtGcgagtctGGtatGATAGCTTCATTGCTTACCAGAATTCAGAGATCTGGTAAGCAATGAAGCTAGTTTTGct  
cgagctggcgaattcc  
>CD\_NM\_002414.3:664  
CgCtGcgagtctGGtatGCGGACATGGAGAGCCACCGGAATTCAGAGATCCGGTGGCTCTCCATGTCCATTTTTTGct  
cgagctggcgaattcc  
>CD\_NM\_006378:2682  
CgCtGcgagtctGGtatGCCCGGCACATCCTGCGAACCAATTCAGAGATGGTTCGCAGGATGTGCCGGTTTTTTGct  
cgagctggcgaattcc  
>CD\_NM\_006378:1477  
CgCtGcgagtctGGtatGAGGGCCTGAAGGTGCCTGTGTTTTCAAGAGAAACACAGGCACCTTCAGGCCGTTTTTTGct  
cgagctggcgaattcc  
>CD\_NM\_006378:1359  
CgCtGcgagtctGGtatGAGCCTGAGGACCTTGCAGAAGATTCAGAGATCTTCTGCAAGGTCTCAGGCCTTTTTTGct  
cgagctggcgaattcc  
>CD\_NM\_006378:2879  
CgCtGcgagtctGGtatGAGCCCTACTAATTGGGAAGAAGTTCAGAGACTTCTTCCAATTAGTAGGGCCTTTTTTTGct  
cgagctggcgaattcc  
>CD\_NM\_006378:1356  
CgCtGcgagtctGGtatGAGCGGCCTGAGGACCTTGCAGATTCAGAGATCTGCAAGGTCTCAGGCCGCCTTTTTTTGct  
cgagctggcgaattcc  
>CD\_NM\_006378.2:2850  
CgCtGcgagtctGGtatGCGCCAGACAGTGCTTGAATTTTTCAAGAGAAATTTCAAGCACTGTCTGGGCATTTTTTTGct  
cgagctggcgaattcc  
>CD\_NM\_006378.2:1995  
CgCtGcgagtctGGtatGACCTGCTGCTGTCTTCAAAGAATTCAGAGATCTTTGAAGACAGCAGCAGGGTTTTTTGct  
cgagctggcgaattcc  
>CD\_NM\_006378.2:2436  
CgCtGcgagtctGGtatGCCAGTGCCTGTCAGAGGAGAGTTCAGAGACTCTCTCTGACAGGCACTGGTTTTTTTTGct  
cgagctggcgaattcc  
>CD\_NM\_006378.2:1125  
CgCtGcgagtctGGtatGCACCCATCATCTCCGAAATCTTCAAGAGAGAATTTCTGGGAGATGATGGGTTTTTTTTGct  
cgagctggcgaattcc  
>CD\_NM\_006378.2:1707  
CgCtGcgagtctGGtatGCCTACACCAGCTCCTTGAATTTTTCAAGAGAAAATTCAGGAGCTGGTGTAGTTTTTTTTGct  
cgagctggcgaattcc  
>CD\_NM\_006378.2:2503  
CgCtGcgagtctGGtatGAGAAGTGAAGGTGGTCCAAAGTTCAGAGACTTTGGAACCACCTTCACTTCCTTTTTTTGct  
cgagctggcgaattcc  
>CD\_NM\_006378.2:1717  
CgCtGcgagtctGGtatGATCCTTGAATTTGCCAGACAAGTTCAGAGACTTGTCTGGCAAATTCAGGAGTTTTTTGct  
cgagctggcgaattcc  
>CD\_NM\_006378.2:1939  
CgCtGcgagtctGGtatGAGCTGTTACATCATCGAGGAGTTCAGAGACTCTCGATGATGTGAACAGCGTTTTTTGct  
cgagctggcgaattcc  
>CD\_NM\_006378.2:1738  
CgCtGcgagtctGGtatGAACGCTGCAGTTCGTTAAAGACTTCAAGAGAGTCTTTAACGAACTGCAGCGTTTTTTGct  
cgagctggcgaattcc  
>CD\_NM\_006378.2:1163



CgCtGcgagtctGGtatGCGGACAGAAATATGCAATCCCTTTTCAAGAGAAAGGGATTGCATATTCTGTCCTTTTTTgct  
cgagctggcgaattcc  
>CD\_NM\_006378.2:886  
CgCtGcgagtctGGtatGAACAGAGTGCCTCAACTACATCTTCAAGAGAGATGTAGTTGAGGCACTCTGTCTTTTTGct  
cgagctggcgaattcc  
>CD\_NM\_006378.2:2335  
CgCtGcgagtctGGtatGATTCCAGAATGACGTGTTGAAGTTCAAGAGACTTCAACACGTCATTCTGGAACTTTTTgct  
cgagctggcgaattcc  
>CD\_NM\_006378.2:2446  
CgCtGcgagtctGGtatGATCAGAGGAGAGGGTTAAGAACTTCAAGAGAGTTCTTAACCCTCTCTCTGACTTTTTGct  
cgagctggcgaattcc  
>CD\_NM\_006378.2:1435  
CgCtGcgagtctGGtatGAGTCTTCAATGTGCTGCGGGATTTCAAGAGAATCCCGCAGCACATTGAAGACCTTTTTGct  
cgagctggcgaattcc  
>CD\_NM\_006378.2:2682  
CgCtGcgagtctGGtatGACGGCACATCCTGCGAACCAAATTCAAGAGATTTGGTTCGCAGGATGTGCCGTTTTTgct  
cgagctggcgaattcc  
>CD\_NM\_006378.2:2217  
CgCtGcgagtctGGtatGCTGCTTCTGTGTGCCCGGATAATTCAAGAGATTATCCGGGCACACAGAAGCATTTTTTGct  
cgagctggcgaattcc  
>CD\_NM\_006378.2:793  
CgCtGcgagtctGGtatGAGCACTCAACATCTCCGAGAAGTTCAAGAGACTTCTCGGAGATGTTGAGTGCCTTTTTGct  
cgagctggcgaattcc  
>CD\_NM\_006378.2:3103  
CgCtGcgagtctGGtatGACCCTTTGACGTCAAGTGTGAGTTCAAGAGACTCACACTTGACGTCAAAGGGCTTTTTGct  
cgagctggcgaattcc  
>CD\_NM\_006378.2:2543  
CgCtGcgagtctGGtatGCTGTCAAGTGTTCAGACAGAAGTTCAAGAGACTTCTGTCTGAACAACGACAATTTTTGct  
cgagctggcgaattcc  
>CD\_NM\_006378.2:1858  
CgCtGcgagtctGGtatGAGCCCTGGATGGGACTGTCTATTTCAAGAGAATAGACAGTCCCATCCAGGGCCTTTTTGct  
cgagctggcgaattcc  
>CD\_NM\_006378.2:1627  
CgCtGcgagtctGGtatGAACCAAGTGGGTGCGCTATAATTTCAAGAGAATTATAGCGCACCCACTTGGTGTTTTTGct  
cgagctggcgaattcc  
>CD\_NM\_006378.2:721  
CgCtGcgagtctGGtatGATCAGCCTTGCTGCTGAGCGAGTTCAAGAGACTCGCTCAGCAGCAAGGCTGAGTTTTTgct  
cgagctggcgaattcc  
>CD\_NM\_006378.2:2555  
CgCtGcgagtctGGtatGAAGACAGAAGGTAGTAGGATTGTTCAAGAGACAATCCTACTACCTTCTGTCTGTTTTTgct  
cgagctggcgaattcc  
>CD\_NM\_006378.2:1567  
CgCtGcgagtctGGtatGCGCCGAGGAGGTCCTTCTCCCACTTCAAGAGAGTGGGAGAAGACCTCCTCGGCTTTTTTgct  
cgagctggcgaattcc  
>CD\_NM\_006378.2:1873  
CgCtGcgagtctGGtatGCGTCTATGATGTCATGTTTGTCTTCAAGAGAGACAAACATGACATCATAGACATTTTTGct  
cgagctggcgaattcc  
>CD\_NM\_006378.2:1993  
CgCtGcgagtctGGtatGAACCTGCTGCTGTCTTCAAAGTTCAAGAGACTTGAAGACAGCAGCAGGGTCTTTTTGct  
cgagctggcgaattcc  
>CD\_NM\_006378.2:632  
CgCtGcgagtctGGtatGACGATGGCATTGACCCATACTTCAAGAGAGTATGGGTGCAAATGCCATCGCTTTTTGct  
cgagctggcgaattcc  
>CD\_NM\_006378.2:3108

CgCctGcgagtctGGtatGCTGACGTCAAGTGTGAGCTGAATTCAAGAGATTCAGCTCACACTTGACGTCAATTTTTGct  
cgagctggcgaattcc  
>CD\_NM\_004258:1860  
CgCctGcgagtctGGtatGAACGAAAGTGTGCGAGTCTTTATTCAAGAGATAAAGACTGCGACACTTTCGTCTTTTTGct  
cgagctggcgaattcc  
>CD\_NM\_004258:3005  
CgCctGcgagtctGGtatGCAGCTCTCTGGGTGGACTTGAATTCAAGAGATTCAGTCCACCCAGAGAGCTTTTTTTGct  
cgagctggcgaattcc  
>CD\_NM\_004258:1765  
CgCctGcgagtctGGtatGAAGCCAGCTAGCTCTCACATATTTCAAGAGAATATGTGAGAGCTAGCTGGCTGTTTTGct  
cgagctggcgaattcc  
>CD\_NM\_004258:780  
CgCctGcgagtctGGtatGCTGGATTCAGGATCCAGATGAATTCAAGAGATTCATCTGGATCCTGAATCCATTTTTGct  
cgagctggcgaattcc  
>CD\_NM\_004258:975  
CgCctGcgagtctGGtatGCTGGTTCTTCAATGGGACTGAATTCAAGAGATTCAGTCCCATTGAAGAACCAATTTTTGct  
cgagctggcgaattcc  
>CD\_NM\_004258:3029  
CgCctGcgagtctGGtatGCGGCTGGAGGTGTGACCACAAATTCAGAGATTTGTGGTCACACCTCCAGCCTTTTTGct  
cgagctggcgaattcc  
>CD\_NM\_004258:1539  
CgCctGcgagtctGGtatGCGGCACATATGAGTGCAGAGTATTCAAGAGATACTCTGCACTCATATGTGCCATTTTTGct  
cgagctggcgaattcc  
>CD\_NM\_004258.1:1872  
CgCctGcgagtctGGtatGAAGTCTTTATTTTCGTTCACTTCAAGAGAGTTGTGAACGAAATAAAGACTGTTTTGct  
cgagctggcgaattcc  
>CD\_NM\_004258.1:194  
CgCctGcgagtctGGtatGATCTGTTTACCTGCCGACAACTTCAAGAGAGTTTGTGCGCAGGTAAACAGACTTTTTGct  
cgagctggcgaattcc  
>CD\_NM\_004258.1:1551  
CgCctGcgagtctGGtatGCGCAGAGTATCTGAGAAGTCTCTTCAAGAGAGAGACTTCTCAGATACTCTGCATTTTTGct  
cgagctggcgaattcc  
>CD\_NM\_004258.1:1929  
CgCctGcgagtctGGtatGATGTATCAGTGTGAAGTAGAAGTTCAAGAGACTTCTACTTCACACTGATACACTTTTTGct  
cgagctggcgaattcc  
>CD\_NM\_004258.1:2088  
CgCctGcgagtctGGtatGCACTCCAACACTGATATAGAATTTCAAGAGAATTCATATCAGTGTGGAGTTTTTTGct  
cgagctggcgaattcc  
>CD\_NM\_004258.1:987  
CgCctGcgagtctGGtatGAGGACTGAAATTGCTCACATTGTTCAAGAGACAATGTGAGCAATTTAGTCCCTTTTTGct  
cgagctggcgaattcc  
>CD\_NM\_004258.1:887  
CgCctGcgagtctGGtatGCGCTGACAGCTTGTGTTGCTGAATTCAAGAGATTCAGCAAACAAGCTGTCAGCTTTTTGct  
cgagctggcgaattcc  
>CD\_NM\_004258.1:1630  
CgCctGcgagtctGGtatGCGGAGTCAAGTTTACAAGTTAGTTCAAGAGACTAACTTGTAACCTTGACTCCATTTTTGct  
cgagctggcgaattcc  
>CD\_NM\_004258.1:712  
CgCctGcgagtctGGtatGAATTCAGGCTGTCCATAGAGAGTTCAAGAGACTCTCTATGGACAGCCTGAATGTTTTGct  
cgagctggcgaattcc  
>CD\_NM\_004258.1:1805  
CgCctGcgagtctGGtatGAACCCACAATGGCCTATTGAATTCAAGAGATTCATAGTGCCATTGTGGGTGTTTTGct  
cgagctggcgaattcc  
>CD\_NM\_004258.1:476

CgCtGcgagtctGGtatGCTCTCAGACTCTCGGTAAGGAGTTCAAGAGACTCCTTACCGAGAGTCTGAGAATTTTTGct  
cgagctggcgaattcc  
>CD\_NM\_004258.1:3005  
CgCtGcgagtctGGtatGCGCTCTCTGGGTGGACTTGAAATTTCAAGAGATTTCAAGTCCACCCAGAGAGCTTTTTTgct  
cgagctggcgaattcc  
>CD\_NM\_004258.1:1954  
CgCtGcgagtctGGtatGCTGACAGAAATTCCTATAACAATTTCAAGAGATTGTATAGGAATTTCTGTCATTTTTTgct  
cgagctggcgaattcc  
>CD\_NM\_004258.1:2552  
CgCtGcgagtctGGtatGCCTGTACTCTGTGATGTGGTACTTTCAAGAGAGTACCACATCACAGAGTACAGATTTTTTgct  
cgagctggcgaattcc  
>CD\_NM\_004258.1:2882  
CgCtGcgagtctGGtatGCTTACTCTATTTCTGTTCATCTTTCAAGAGAGATGAACAGGAAATAGAGTAAATTTTTGct  
cgagctggcgaattcc  
>CD\_NM\_004258.1:1739  
CgCtGcgagtctGGtatGACCACTCACTGTGACGTGGCAGTTCAAGAGACTGCCACGTACAGTGTGGCTTTTTTgct  
cgagctggcgaattcc  
>CD\_NM\_004258.1:1529  
CgCtGcgagtctGGtatGAACAGACAGTGGCACATATGAGTTCAAGAGACTCATATGTGCCACTGTCTGTGTTTTTgct  
cgagctggcgaattcc  
>CD\_NM\_004258.1:2687  
CgCtGcgagtctGGtatGCACAGACTTTGTCCTGAAGCTTTTTCAAGAGAAAGCTTCAGGACAAAGTCTGTATTTTTTgct  
cgagctggcgaattcc  
>CD\_NM\_004258.1:1527  
CgCtGcgagtctGGtatGCTCACAGACAGTGGCACATATGTTCAAGAGACATATGTGCCACTGTCTGTGATTTTTTgct  
cgagctggcgaattcc  
>CD\_NM\_004258.1:1669  
CgCtGcgagtctGGtatGAGCAGGTGATGTTAACCAACTTTCAAGAGAGTGTGGTTAACATCACCTGCGTTTTTgct  
cgagctggcgaattcc  
>CD\_NM\_004258.1:2306  
CgCtGcgagtctGGtatGACTGCACATTTCTGAATGTGGAATTTCAAGAGATTCACATTCAGAATGTGCAGTTTTTgct  
cgagctggcgaattcc  
>CD\_NM\_004258.1:1667  
CgCtGcgagtctGGtatGACCGCAGGTGATGTTAACCAACTTTCAAGAGAGTGTGGTTAACATCACCTGCGGTTTTTgct  
cgagctggcgaattcc  
>CD\_NM\_004258.1:218  
CgCtGcgagtctGGtatGAACCCAGGAAGTCCAGATCATTTTTCAAGAGAAATGATCTGGACTTCTTGGTCTTTTTTgct  
cgagctggcgaattcc  
>CD\_NM\_004258.1:607  
CgCtGcgagtctGGtatGATGAGATTATTTCTCTCTCCAATTTCAAGAGATTGGAGAGAGAAATAATCTCAGTTTTTgct  
cgagctggcgaattcc  
>CD\_NM\_004258.1:754  
CgCtGcgagtctGGtatGATCAGCTGTTCTGTGAGGCAACTTTCAAGAGAGTTGCCTCACAGAACAGCTGACTTTTTTgct  
cgagctggcgaattcc  
>CD\_NM\_004258.1:1094  
CgCtGcgagtctGGtatGAGCTTTCTCTCTCAAGATCTTTTCAAGAGAGAAGATCTTGAGAGAGAAAGCCTTTTTTgct  
cgagctggcgaattcc  
>CD\_NM\_000873:135  
CgCtGcgagtctGGtatGCTCGAGGTACACGTGAGGCCAATTTCAAGAGATTGGCCTCACGTGTACCTCGAATTTTTTgct  
cgagctggcgaattcc  
>CD\_NM\_000873:226  
CgCtGcgagtctGGtatGCGGGTGGTCTGGAGACCTCTTTTTCAAGAGAAGAGAGGTCTCCAGACCACCCATTTTTTgct  
cgagctggcgaattcc  
>CD\_NM\_000873:229

CgCctGcgagtctGGtatGATGGTCTGGAGACCTCTCTAAATTCAAGAGATTTAGAGAGGTCTCCAGACCACTTTTTGct  
cgagctggcgaattcc  
>CD\_NM\_000873:261  
CgCctGcgagtctGGtatGATGGACGAACAGGCTCAGTGGATTCAAGAGATCCACTGAGCCTGTTTCGTCCAGTTTTTGct  
cgagctggcgaattcc  
>CD\_NM\_000873:342  
CgCctGcgagtctGGtatGCCCCGGAAGCAGGAGTCAATGATTCAAGAGATCATTGACTCCTGCTTCCCGGATTTTTTGct  
cgagctggcgaattcc  
>CD\_NM\_000873:381  
CgCctGcgagtctGGtatGCACCAGCCTCCAAGGCAGGTCATTCAAGAGATGACCTGCCTTGGAGGCTGGTATTTTTTGct  
cgagctggcgaattcc  
>CD\_NM\_000873:234  
CgCctGcgagtctGGtatGATGGAGACCTCTCTAAATAAGATTCAAGAGATCTTATTTAGAGAGGTCTCCAGTTTTTGct  
cgagctggcgaattcc  
>CD\_NM\_000873:343  
CgCctGcgagtctGGtatGACGGGAAGCAGGAGTCAATGAATTCAAGAGATTCATTGACTCCTGCTTCCCGTTTTTGct  
cgagctggcgaattcc  
>CD\_NM\_000873.2:327  
CgCctGcgagtctGGtatGACCACTTCACCTGCTCCGGGAATTCAAGAGATTCCTCCGGAGCAGGTGAAGTGGCTTTTTTGct  
cgagctggcgaattcc  
>CD\_NM\_000873.2:652  
CgCctGcgagtctGGtatGAGGTGGCAACATCTTTTCAAAATTCAAGAGATTTGTGAAAGATGTTGCCACCGTTTTTGct  
cgagctggcgaattcc  
>CD\_NM\_000873.2:622  
CgCctGcgagtctGGtatGATGCCTGGCTGTGCTGGACTTGTTC AAGAGACAAGTCCAGCACAGCCAGGCAGTTTTTGct  
cgagctggcgaattcc  
>CD\_NM\_000873.2:263  
CgCctGcgagtctGGtatGAACGAACAGGCTCAGTGGAACTTCAAGAGAGTTTCCACTGAGCCTGTTTCGTCTTTTTTGct  
cgagctggcgaattcc  
>CD\_NM\_000873.2:777  
CgCctGcgagtctGGtatGATGTCTCTGCTTTCATCTTTTTCAAGAGAAAGATGAAGCAGAGCAGGACAGTTTTTGct  
cgagctggcgaattcc  
>CD\_NM\_000873.2:267  
CgCctGcgagtctGGtatGCACAGGCTCAGTGGAAACATTATTCAAGAGATAATGTTTTCCACTGAGCCTGTTTTTTTGct  
cgagctggcgaattcc  
>CD\_NM\_000873.2:595  
CgCctGcgagtctGGtatGAAGAGAGGATGGCCACCGCAACTTCAAGAGAGTTGCGGTGGCCATCCTCTCTGTTTTTGct  
cgagctggcgaattcc  
>CD\_NM\_000873.2:285  
CgCctGcgagtctGGtatGCTTACTTGGTCTCAAACATCTCTTCAAGAGAGAGATGTTTGAGACCAAGTAATTTTTTGct  
cgagctggcgaattcc  
>CD\_NM\_000873.2:718  
CgCctGcgagtctGGtatGAAGCCAGATGGTCATCATAGTCTTCAAGAGAGACTATGATGACCATCTGGCTGTTTTTGct  
cgagctggcgaattcc  
>CD\_NM\_000873.2:429  
CgCctGcgagtctGGtatGATGTGGGCAAGTCCTTACCATTTCAAGAGAATGGTGAAGGACTTGGCCACAGTTTTTGct  
cgagctggcgaattcc  
>CD\_NM\_000873.2:280  
CgCctGcgagtctGGtatGAAAACATTACTTGGTCTCAAACCTTCAAGAGAGTTTGAGACCAAGTAATGTTTCTTTTTTGct  
cgagctggcgaattcc  
>CD\_NM\_000873.2:511  
CgCctGcgagtctGGtatGAAATGAGACTCTGCACTATGAGTTCAAGAGACTCATAGTGCAGAGTCTCATTGTTTTTGct  
cgagctggcgaattcc  
>CD\_NM\_000873.2:151

CgCctGcgagtctGGtatGACCAAAGAAGCTGGCGGTTGAGTTCAAGAGACTCAACCGCCAGCTTCTTTGGCTTTTTTGct  
cgagctggcgaattcc  
>CD\_NM\_000873.2:564  
CgCctGcgagtctGGtatGCGGCCACAGCCACATTC AACAGTTCAAGAGACTGTTGAATGTGGCTGTGGCCTTTTTTGct  
cgagctggcgaattcc  
>CD\_NM\_000873.2:484  
CgCctGcgagtctGGtatGAAGCCTCACCTCTTTCCTGTTCTTCAAGAGAGAACAGGAAGAGGGTGAGGCTGTTTTTGct  
cgagctggcgaattcc  
>CD\_NM\_000873.2:78  
CgCctGcgagtctGGtatGACCTGACTGTGGCCCTCTTCACTTCAAGAGAGTGAAGAGGGCCACAGTCAGGGTTTTTGct  
cgagctggcgaattcc  
>CD\_NM\_000873.2:186  
CgCctGcgagtctGGtatGCCGAGGTCAACTGCAGCACCCTTCAAGAGAGTGGTGCTGCAGTTGACCTCGATTTTTTGct  
cgagctggcgaattcc  
>CD\_NM\_000873.2:720  
CgCctGcgagtctGGtatGACCAGATGGTCATCATAGTCACTTCAAGAGAGTACTATGATGACCATCTGGCTTTTTTGct  
cgagctggcgaattcc  
>CD\_NM\_000873.2:513  
CgCctGcgagtctGGtatGCTGAGACTCTGCACTATGAGACTTCAAGAGAGTCTCATAGTGCAGAGTCTCATTTTTTGct  
cgagctggcgaattcc  
>CD\_NM\_000873.2:76  
CgCctGcgagtctGGtatGAACCTGACTGTGGCCCTCTTCTTCAAGAGAGAAGAGGGCCACAGTCAGGGTCTTTTTTGct  
cgagctggcgaattcc  
>CD\_NM\_000873.2:231  
CgCctGcgagtctGGtatGATCTGGAGACCTCTCTAAATAATTCAAGAGATTATTTAGAGAGGTCTCCAGACTTTTTTGct  
cgagctggcgaattcc  
>CD\_NM\_000873.2:232  
CgCctGcgagtctGGtatGCCTGGAGACCTCTCTAAATAAGTTCAAGAGACTTATTTAGAGAGGTCTCCAGATTTTTTGct  
cgagctggcgaattcc  
>CD\_NM\_000873.2:57  
CgCctGcgagtctGGtatGCGTCCTCTTTCGGTTACAGGACTTCAAGAGAGTCTGTAAACCGAAAGAGGACATTTTTTGct  
cgagctggcgaattcc  
>CD\_NM\_000873.2:509  
CgCctGcgagtctGGtatGAGCAATGAGACTCTGCACTATGTTCAAGAGACATAGTGCAGAGTCTCATGCTTTTTTGct  
cgagctggcgaattcc  
>CD\_NM\_000873.2:84  
CgCctGcgagtctGGtatGATGTGGCCCTCTTACCCTGATTTCAAGAGAATCAGGGTGAAGAGGGCCACAGTTTTTGct  
cgagctggcgaattcc  
>CD\_NM\_002208:539  
CgCctGcgagtctGGtatGAGCCAACTTCTTCGACCTTGAATTCAAGAGATTCAAGGTGCAAGAAGTTGGCCTTTTTTGct  
cgagctggcgaattcc  
>CD\_NM\_002208:1120  
CgCctGcgagtctGGtatGCGGGTGTGAGCGCTTTGCCATTTCAAGAGAATGGCAAAGCGCTCAACACCCTTTTTTGct  
cgagctggcgaattcc  
>CD\_NM\_002208:1952  
CgCctGcgagtctGGtatGCGCCAGCTTCGGCAGTGTGTATTTCAAGAGAATACACACTGCCGAAGCTGGCATTTTTTGct  
cgagctggcgaattcc  
>CD\_NM\_002208:2066  
CgCctGcgagtctGGtatGATCCATGGCTGGTGGCTTTGATTTCAAGAGAATCAAAGCCACCAGCCATGGACTTTTTTGct  
cgagctggcgaattcc  
>CD\_NM\_002208:2339  
CgCctGcgagtctGGtatGCCGGCTGCAGTGTTCAGACGTATTCAAGAGATACGTCTGAACACTGCAGCCGTTTTTGct  
cgagctggcgaattcc  
>CD\_NM\_002208:3290

CgCctGcgagtctGGtatGAAGCTGTGTCATCGCTTCAGATTTCAAGAGAATCTGAAGCGATGACACAGCTCTTTTTTGct  
cgagctggcgaattcc  
>CD\_NM\_002208.3:3068  
CgCctGcgagtctGGtatGAGGGCTTCTCACCACAAAGAATTCAGAGATTCCTTTGTGGTGAGAAAGCCCTTTTTTGct  
cgagctggcgaattcc  
>CD\_NM\_002208.3:3634  
CgCctGcgagtctGGtatGCTCAGAGAATCTGCTCGAAGAATTCAGAGATTCCTTCGAGCAGATTCCTGATTTTTTGct  
cgagctggcgaattcc  
>CD\_NM\_002208.3:789  
CgCctGcgagtctGGtatGCAGACTTCATCTCCAACATGATTTCAAGAGAATCATGTTGGAGATGAAGTCTTTTTTTGct  
cgagctggcgaattcc  
>CD\_NM\_002208.3:3493  
CgCctGcgagtctGGtatGCTCTTTGCCTATCATCATTAAATTCAGAGATTTAATGATGATAGGCAAAGAATTTTTGct  
cgagctggcgaattcc  
>CD\_NM\_002208.3:2949  
CgCctGcgagtctGGtatGATGTCACCAATCCAATGAAAGTTCAAGAGACTTTCATTGGAATTGGTGACAGTTTTTGct  
cgagctggcgaattcc  
>CD\_NM\_002208.3:990  
CgCctGcgagtctGGtatGCAGACAGCATCTTCACCTCAAGTTCAAGAGACTTGAGGTGAAGATGCTGTCTATTTTTGct  
cgagctggcgaattcc  
>CD\_NM\_002208.3:2867  
CgCctGcgagtctGGtatGCAGAGGTCATCTGCTCATGTTTTTCAAGAGAAAACATGAGCAGATGACCTCTTTTTTTGct  
cgagctggcgaattcc  
>CD\_NM\_002208.3:1513  
CgCctGcgagtctGGtatGAGCTGTGGCCGTGCTGCACAAGTTCAAGAGACTTGTGCAGCACGGCCACAGCGTTTTTGct  
cgagctggcgaattcc  
>CD\_NM\_002208.3:2777  
CgCctGcgagtctGGtatGCAGCCTCCCTCTCCAACATTTCTTCAAGAGAGAATGTTTGGAGAGGGAGGCTTTTTTTGct  
cgagctggcgaattcc  
>CD\_NM\_002208.3:3436  
CgCctGcgagtctGGtatGCGCAGAGAACCACAGAACTAAGTTCAAGAGACTTAGTTCTGTGGTTCTCTGCATTTTTGct  
cgagctggcgaattcc  
>CD\_NM\_002208.3:2870  
CgCctGcgagtctGGtatGCGGTCATCTGCTCATGTTTCAGTTCAAGAGACTGAAACATGAGCAGATGACCTTTTTTTGct  
cgagctggcgaattcc  
>CD\_NM\_002208.3:3344  
CgCctGcgagtctGGtatGCGGGATCACTCTGAGGAGTTACTTCAAGAGAGTAACTCCTCAGAGTGATCCATTTTTTGct  
cgagctggcgaattcc  
>CD\_NM\_002208.3:1957  
CgCctGcgagtctGGtatGATTCGGCAGTGTGTATATCTACTTCAAGAGAGTAGATATACACACTGCCGAAGTTTTTGct  
cgagctggcgaattcc  
>CD\_NM\_002208.3:1054  
CgCctGcgagtctGGtatGAACCGATGGTGGCATATTCGAGTTCAAGAGACTCGAATATGCCACCATCGGTGTTTTTGct  
cgagctggcgaattcc  
>CD\_NM\_002208.3:2580  
CgCctGcgagtctGGtatGCTGAGAAGGCCTGCAAGAATAATTCAGAGATTATTCCTTGCAGGCCTTCTCATTTTTTGct  
cgagctggcgaattcc  
>CD\_NM\_002208.3:2454  
CgCctGcgagtctGGtatGCGGACTGCTTCTCCAATGCCAGTTCAAGAGACTGGCATTGGAGAAGCAGTCCTTTTTTGct  
cgagctggcgaattcc  
>CD\_NM\_002208.3:133  
CgCctGcgagtctGGtatGATTCCACACTCTGCTCTGCATATTCAGAGATATGCAGAGCAGAGTGTGGAAGTTTTTGct  
cgagctggcgaattcc  
>CD\_NM\_002208.3:2818

CgCctGcgagtctGGtatGAGTTGCTTCTGTCCATGATCATGTTCAAGAGACATGATCAGGACAGAAGCAACCTTTTTGct  
cgagctggcgaattcc  
>CD\_NM\_002208.3:3027  
CgCctGcgagtctGGtatGCTCTGTCCAAACCATCCATAATTTCAAGAGAATTATGGATGGTTTGGACAGAATTTTTGct  
cgagctggcgaattcc  
>CD\_NM\_002208.3:1246  
CgCctGcgagtctGGtatGACTGGATGGGCTGCTGAGCAAATTTCAAGAGATTTGCTCAGCAGCCCATCCAGCTTTTTGct  
cgagctggcgaattcc  
>CD\_NM\_002208.3:2407  
CgCctGcgagtctGGtatGCTGTGAGGACCTCCTGCTCATGTTCAAGAGACATGAGCAGGAGGTCTCACAATTTTTGct  
cgagctggcgaattcc  
>CD\_NM\_002208.3:3463  
CgCctGcgagtctGGtatGCGTCGTCTTCTGAAAGATGAGTTCAAGAGACTCATCTTTCAGGAAGACGACATTTTTGct  
cgagctggcgaattcc  
>CD\_NM\_002208.3:1342  
CgCctGcgagtctGGtatGAAGTGCTCAGATCCTGGATGAGTTCAAGAGACTCATCCAGGATCTGAGCACTGTTTTGct  
cgagctggcgaattcc  
>CD\_NM\_002208.3:1219  
CgCctGcgagtctGGtatGCGCTTTCAAGGTGACCAACTACTTCAAGAGAGTAGTTGGTCACCTTGAAAGCATTTTTGct  
cgagctggcgaattcc  
>CD\_NM\_002208.3:1585  
CgCctGcgagtctGGtatGAGCCGTGTTGAGCTCCAGAAGTTCAAGAGACTTCTGGAGCTCAAACACGGCCTTTTTGct  
cgagctggcgaattcc  
>CD\_NM\_002208.3:2939  
CgCctGcgagtctGGtatGCTCACTGTGACTGTCACCAATTTTTCAAGAGAAATTGGTGACAGTCACAGTGATTTTTGct  
cgagctggcgaattcc  
>CD\_NM\_002208.3:466  
CgCctGcgagtctGGtatGACCTCACAGCCTCAGCTCAGAATTTCAAGAGATTTCTGAGCTGAGGCTGTGAGGCTTTTTGct  
cgagctggcgaattcc  
>CD\_X51841:302  
CgCctGcgagtctGGtatGCCGGAGTGTGTCCGTGTGGATATTTCAAGAGATATCCACACGGACACACTCCGTTTTTgct  
cgagctggcgaattcc  
>CD\_X51841:676  
CgCctGcgagtctGGtatGAACCAGCGACTACACTATTGGATTTCAAGAGATCCAATAGTGTAGTCGCTGGTGTTTTTGct  
cgagctggcgaattcc  
>CD\_X51841:1778  
CgCctGcgagtctGGtatGCACGAGGGTCAAGTTCTGCGAGTTTTCAAGAGAACTCGCAGAACTGACCCTCGTATTTTTGct  
cgagctggcgaattcc  
>CD\_X51841:2015  
CgCctGcgagtctGGtatGCCGGACACCATCTGCGAGATCATTCAAGAGATGATCTCGCAGATGGTGTCCGTTTTTgct  
cgagctggcgaattcc  
>CD\_X51841:2555  
CgCctGcgagtctGGtatGATCCGCTGGAAGGTCACCAACATTTCAAGAGATGTTGGTGACCTTCCAGCGGACTTTTTGct  
cgagctggcgaattcc  
>CD\_X51841:2997  
CgCctGcgagtctGGtatGCGGGCGTGGAGCTGGTGGACGTTTTCAAGAGAACGTCCACCAGCTCCACGCCCTTTTTGct  
cgagctggcgaattcc  
>CD\_X51841:2309  
CgCctGcgagtctGGtatGACGGGCTCCTTCTGGTGGCTCATTCAAGAGATGAGCCACCAGAAGGAGCCCGTTTTTgct  
cgagctggcgaattcc  
>CD\_NM\_000213.3:2015  
CgCctGcgagtctGGtatGAGGACACCATCTGCGAGATCAATTTCAAGAGATTTGATCTCGCAGATGGTGTCCGTTTTTgct  
cgagctggcgaattcc  
>CD\_NM\_000213.3:1873

CgCctGcgagtctGGtatGATGTGTGAGCCTGGTTGGACAGTTCAAGAGACTGTCCAACCAGGCTCACACACTTTTTTGct  
cgagctggcgaattcc  
>CD\_NM\_000213.3:5019  
CgCctGcgagtctGGtatGACGTGAGGGTGTTCATCACCATTTTCAAGAGAAATGGTGATGACACCCTCACGTTTTTTGct  
cgagctggcgaattcc  
>CD\_NM\_000213.3:4271  
CgCctGcgagtctGGtatGAGCCCAGCGTCTCCGATGACACTTCAAGAGAGTGTTCATCGGAGACGCTGGGCCTTTTTTGct  
cgagctggcgaattcc  
>CD\_NM\_000213.3:306  
CgCctGcgagtctGGtatGATGTGTCCGTGTGGATAAGGACTTCAAGAGAGTCTTATCCACACGGACACACTTTTTTGct  
cgagctggcgaattcc  
>CD\_NM\_000213.3:2715  
CgCctGcgagtctGGtatGACGCCAGGAGGTGGAGGAGAACTTCAAGAGAGTTCCTCCACCTCCTGGCGCTTTTTTGct  
cgagctggcgaattcc  
>CD\_NM\_000213.3:5304  
CgCctGcgagtctGGtatGAAGCGAGAACGTGCCCTACAAGTTCAAGAGACTTGTAGGGCACGTTCTCGCTGTTTTTGct  
cgagctggcgaattcc  
>CD\_NM\_000213.3:2274  
CgCctGcgagtctGGtatGAACTGTCTGGTGCACAAGAAGTTCAAGAGACTTCTTGTGCACCAGGACAGTTTTTTGct  
cgagctggcgaattcc  
>CD\_NM\_000213.3:300  
CgCctGcgagtctGGtatGAACGGAGTGTGTCCGTGTGGATTTCAAGAGAATCCACACGGACACACTCCGTGTTTTTGct  
cgagctggcgaattcc  
>CD\_NM\_000213.3:834  
CgCctGcgagtctGGtatGACGGAATAAACTGCAGGGAGAGTTCAAGAGACTCTCCCTGCAGTTTATTCCGGTTTTTTGct  
cgagctggcgaattcc  
>CD\_NM\_000213.3:3676  
CgCctGcgagtctGGtatGAAGGGTGACTCCGAATCCGAAGTTCAAGAGACTTCGGATTCGGAGTCACCCGTTTTTTGct  
cgagctggcgaattcc  
>CD\_NM\_000213.3:339  
CgCctGcgagtctGGtatGAACAGACGAGATGTTCAAGGACTTCAAGAGAGTCCCTGAACATCTCGTCTGTGTTTTTGct  
cgagctggcgaattcc  
>CD\_NM\_000213.3:3993  
CgCctGcgagtctGGtatGAATGAAGAAAGTGTGGTTGACTTCAAGAGAGTCAACCAGCACTTCTTCATGTTTTTGct  
cgagctggcgaattcc  
>CD\_NM\_000213.3:1157  
CgCctGcgagtctGGtatGATGTCACCAACTACTCCTATAGTTCAAGAGACTATAGGAGTAGTTGGTGACAGTTTTTGct  
cgagctggcgaattcc  
>CD\_NM\_000213.3:2439  
CgCctGcgagtctGGtatGCGGTACATGGTGGGCTTTAAGTTCAAGAGACTTAAAGCCCACCATGTGACCTTTTTTGct  
cgagctggcgaattcc  
>CD\_NM\_000213.3:1614  
CgCctGcgagtctGGtatGAGGACAGTGTGTGTGCAGCGAGTTCAAGAGACTCGCTGCACACACACTGTCCGTTTTTGct  
cgagctggcgaattcc  
>CD\_NM\_000213.3:302  
CgCctGcgagtctGGtatGAGGAGTGTGTCCGTGTGGATAATTCAAGAGATTATCCACACGGACACACTCCGTTTTTGct  
cgagctggcgaattcc  
>CD\_NM\_000213.3:5496  
CgCctGcgagtctGGtatGAACCGAGCCCTTCTTAGTGGATTTCAAGAGAATCCACTAGGAAGGGCTCGGTGTTTTTGct  
cgagctggcgaattcc  
>CD\_NM\_000213.3:1506  
CgCctGcgagtctGGtatGATCCGACGGCCTCAAGATGGACTTCAAGAGAGTCCATCTTGAGGCCGTCGGAGTTTTTGct  
cgagctggcgaattcc  
>CD\_NM\_000213.3:2309



CgCtGcgagtctGGtatGAGGGCTCCTTCTGGTGGCTCATTTCAAGAGAATGAGCCACCAGAAGGAGCCCGTTTTTGct  
cgagctggcgaattcc  
>CD\_NM\_000213.3:425  
CgCtGcgagtctGGtatGCGGAGAGCAGCTTCCAAATCACTTCAAGAGAGTGATTTGGAAGCTGCTCTCCATTTTGGct  
cgagctggcgaattcc  
>CD\_NM\_000213.3:5630  
CgCtGcgagtctGGtatGCGGACCAACAGTTCTTCCAACTTCAAGAGAGTTTGAAGAAGTGTGGTCCATTTTGGct  
cgagctggcgaattcc  
>CD\_NM\_000213.3:2889  
CgCtGcgagtctGGtatGCACAGAGAAGCAGGTGGAACAGTTCAAGAGACTGTTCCACCTGCTTCTCTGTATTTTGGct  
cgagctggcgaattcc  
>CD\_NM\_000213.3:683  
CgCtGcgagtctGGtatGCCTACACTATTGGATTTGGCAATTCAAGAGATTGCCAAATCCAATAGTGTAGTTTTTGGct  
cgagctggcgaattcc  
>CD\_NM\_000213.3:248  
CgCtGcgagtctGGtatGACCTCTCTGGGACCTTGGCAAATTCAAGAGATTTGCCAAGGTCCCAGAGAGGCTTTTTGGct  
cgagctggcgaattcc  
>CD\_NM\_000213.3:3170  
CgCtGcgagtctGGtatGCGCAGCCTGAGTTCTCGGTCAAGAGACTGACCGAGAAGTCAAGGCTGTTTTTGGct  
cgagctggcgaattcc  
>CD\_NM\_000118:1446  
CgCtGcgagtctGGtatGAACGCCATGACCTGGTACTAATTCAAGAGATTAGTACCAGGGTCATGGCGTTTTTGGct  
cgagctggcgaattcc  
>CD\_NM\_000118:2082  
CgCtGcgagtctGGtatGAACCTGTCTGGTTGCACAAGCATTCAAGAGATGCTTGTGCAACCAGACAGGCTTTTTGGct  
cgagctggcgaattcc  
>CD\_NM\_000118:1306  
CgCtGcgagtctGGtatGCGGCCAGCATTGTCTCACTTCATTCAAGAGATGAAGTGAGACAATGCTGGCCATTTTTGGct  
cgagctggcgaattcc  
>CD\_NM\_000118:1471  
CgCtGcgagtctGGtatGCAGAGCTTGTGCGCATTTGAATTCAAGAGATTCAAATGCGCAACAAGCTTTTTTGGct  
cgagctggcgaattcc  
>CD\_NM\_000118:1613  
CgCtGcgagtctGGtatGAAGCAATGAGGCGGTGGTCAATTTCAAGAGAATTGACCACCGCCTCATTGCTGTTTTTGGct  
cgagctggcgaattcc  
>CD\_NM\_000118.1:1447  
CgCtGcgagtctGGtatGAGCCATGACCTGGTACTAAAGTTCAAGAGACTTTAGTACCAGGGTCATGGCGTTTTTGGct  
cgagctggcgaattcc  
>CD\_NM\_000118.1:2049  
CgCtGcgagtctGGtatGATGTCTTCATGCGCTTGAACATTTCAAGAGAATGTTCAAGCGCATGAAGACAGTTTTTGGct  
cgagctggcgaattcc  
>CD\_NM\_000118.1:1597  
CgCtGcgagtctGGtatGATCAGCAAGTATGATCAGCAATTTCAAGAGAATTGCTGATCATACTTGCTGACTTTTTGGct  
cgagctggcgaattcc  
>CD\_NM\_000118.1:421  
CgCtGcgagtctGGtatGCGCAGAAACAGTCCATTGTGACTTCAAGAGAGTCAATGGACTGTTTCTGCATTTTTGGct  
cgagctggcgaattcc  
>CD\_NM\_000118.1:1045  
CgCtGcgagtctGGtatGAACGGTGACGGTGAAGGTGGAATTCAAGAGATTCACCTTACCGTCACCGTTTTTGGct  
cgagctggcgaattcc  
>CD\_NM\_000118.1:1482  
CgCtGcgagtctGGtatGAGCATTGGAAGTGCACCATCACTTCAAGAGAGTGATGGTGCCTTCAAATGCGTTTTTGGct  
cgagctggcgaattcc  
>CD\_NM\_000118.1:1180

CgCctGcgagtctGGtatGATCCTTCAAGATCTTCCAGAGTTCAAGAGACTCTGGAAAGATCTTGAAGGAGTTTTTGct  
cgagctggcgaattcc  
>CD\_NM\_000118.1:1798  
CgCctGcgagtctGGtatGATCCGAGTTCCTGCTCCAGTTATTCAAGAGATAACTGGAGCAGGAACCTCGGAGTTTTTGct  
cgagctggcgaattcc  
>CD\_NM\_000118.1:820  
CgCctGcgagtctGGtatGATCTGCTGCTGAGCTGAATGACTTCAAGAGAGTCATTCAGCTCAGCAGCAGAGTTTTTGct  
cgagctggcgaattcc  
>CD\_NM\_000118.1:1326  
CgCctGcgagtctGGtatGCTGCCTCCAGCTGCGGTGGTAGTTCAAGAGACTACCACCGCAGCTGGAGGCATTTTTTGct  
cgagctggcgaattcc  
>CD\_NM\_000118.1:634  
CgCctGcgagtctGGtatGACTTCTGGTCCCTCAGTGTAAACTTCAAGAGAGTTTACACTGAGGACCAGAAGCTTTTTGct  
cgagctggcgaattcc  
>CD\_NM\_000118.1:658  
CgCctGcgagtctGGtatGAAGTGTCTTCTGCATCTCCAGTTCAAGAGACTGGAGATGCAGGAAGACACTGTTTTGct  
cgagctggcgaattcc  
>CD\_NM\_000118.1:1705  
CgCctGcgagtctGGtatGAGGCCTCTACCTCAGCCCACACTTCAAGAGAGTGTGGGCTGAGGTAGAGGCCTTTTGct  
cgagctggcgaattcc  
>CD\_NM\_000118.1:387  
CgCctGcgagtctGGtatGCGCTGGCCAGCTGCAGCCTCAGTTCAAGAGACTGAGGCTGCAGCTGGCCAGCATTTTTGct  
cgagctggcgaattcc  
>CD\_NM\_000118.1:2082  
CgCctGcgagtctGGtatGCCCTGTCTGGTTGCACAAGCAATTCAAGAGATTGCTTGTGCAACCAGACAGGTTTTTGct  
cgagctggcgaattcc  
>CD\_NM\_000118.1:1131  
CgCctGcgagtctGGtatGAGCTCATCGACGCCAACCAATTCAAGAGATTGTGGTTGGCGTCGATGAGCCTTTTTGct  
cgagctggcgaattcc  
>CD\_NM\_000118.1:1666  
CgCctGcgagtctGGtatGAGTGCCTCAACATGGACTTCAAGAGAGTCCATGTTGAGGCAGTGCACCTTTTTGct  
cgagctggcgaattcc  
>CD\_NM\_000118.1:2047  
CgCctGcgagtctGGtatGAACTGTCTTCATGCGCTTGAAGTTCAAGAGAGTTCAAGCGCATGAAGACAGTCTTTTTGct  
cgagctggcgaattcc  
>CD\_NM\_000118.1:1849  
CgCctGcgagtctGGtatGAGGAGGCACCGTGAACCTCATCTTCAAGAGAGATGAGTTCCACGGTGCCTCCCTTTTTGct  
cgagctggcgaattcc  
>CD\_NM\_000118.1:2169  
CgCctGcgagtctGGtatGATGCTGCACTCTGGTACATCTATTCAAGAGATAGATGTACCAGAGTGCAGCAGTTTTGct  
cgagctggcgaattcc  
>CD\_NM\_000118.1:691  
CgCctGcgagtctGGtatGACCACTGCACTTGGCCTACAATTTCAAGAGAATTGTAGGCCAAGTGCAGTGGGTTTTGct  
cgagctggcgaattcc  
>CD\_NM\_000118.1:1402  
CgCctGcgagtctGGtatGACCGGAGCTGCTCATGTCCTTGTTCAGAGACAAGGACATGAGCAGCTCCGGTTTTGct  
cgagctggcgaattcc  
>CD\_NM\_000118.1:1410  
CgCctGcgagtctGGtatGCGCTCATGTCCTTGATCCAGACTTCAAGAGAGTCTGGATCAAGGACATGAGCATTTTTGct  
cgagctggcgaattcc  
>CD\_NM\_000118.1:2078  
CgCctGcgagtctGGtatGACTGACCTGCTGGTTGCACAATTCAAGAGATTGTGCAACCAGACAGGTCAGTTTTGct  
cgagctggcgaattcc  
>CD\_NM\_000118.1:2052

CgCtGcgagtctGGtatGCCTTCATGCGCTTGAACATCATTTC AAGAGAATGATGTTCAAGCGCATGAAGATTTTTGct  
cgagctggcgaattcc  
>CD\_NM\_000118.1:1306  
CgCtGcgagtctGGtatGAGCCAGCATTGTCTCATTTC AAGAGAATGAAGTGAGACAATGCTGGCCTTTTTGct  
cgagctggcgaattcc  
>CD\_NM\_000118.1:818  
CgCtGcgagtctGGtatGCCCTCTGCTGCTGAGCTGAATGTTCAAGAGACATTCAGCTCAGCAGCAGAGGTTTTTGTct  
cgagctggcgaattcc  
>CD\_NM\_000118.1:1451  
CgCtGcgagtctGGtatGCTGACCCTGGTACTAAAGAAAGTTCAAGAGACTTCTTTTAGTACCAGGGTCATTTTTTGTct  
cgagctggcgaattcc  
>CD\_NM\_080682:921  
CgCtGcgagtctGGtatGCCAGCACCTTCTGGAAATGCATTCAAGAGATGCATTTCCAGAAAGGTGCTGTTTTTGTct  
cgagctggcgaattcc  
>CD\_NM\_080682:525  
CgCtGcgagtctGGtatGAAAGTGTTCAAGTTGCTGATGTATTCAAGAGATACATCAGCAACTGAACACTGTTTTTGTct  
cgagctggcgaattcc  
>CD\_NM\_080682:2106  
CgCtGcgagtctGGtatGCGCGGGAGTATATGAATGTGAATTCAAGAGATTCACATTCATATACTCCCGCATTTTTTGTct  
cgagctggcgaattcc  
>CD\_NM\_080682:995  
CgCtGcgagtctGGtatGCAGGAGTTAATTTGATTGGGAATTCAAGAGATTCCTCAATCAAATTAACCTTTTTTGTct  
cgagctggcgaattcc  
>CD\_NM\_001078:2106  
CgCtGcgagtctGGtatGCGCGGGAGTATATGAATGTGAATTCAAGAGATTCACATTCATATACTCCCGCATTTTTTGTct  
cgagctggcgaattcc  
>CD\_NM\_001078:2142  
CgCtGcgagtctGGtatGCGGCTCACAATTAAGAAGTTTATTCAAGAGATAAACTTCTTAATTGTGAGCCATTTTTTGTct  
cgagctggcgaattcc  
>CD\_NM\_001078:1615  
CgCtGcgagtctGGtatGCGGCAGAGTACGCAAACACTTTTTCAAGAGAAAAGTGTGCGTACTCTGCCTTTTTTGTct  
cgagctggcgaattcc  
>CD\_NM\_001078:1843  
CgCtGcgagtctGGtatGAGGGTTTATTTATGTGAAGGAATTCAAGAGATTCCTTCACATAAATAAACCCCTTTTTTGTct  
cgagctggcgaattcc  
>CD\_NM\_001078:995  
CgCtGcgagtctGGtatGCAGGAGTTAATTTGATTGGGAATTCAAGAGATTCCTCAATCAAATTAACCTTTTTTGTct  
cgagctggcgaattcc  
>CD\_NM\_001078:2207  
CgCtGcgagtctGGtatGATCCTGAGCTTCTCGTGCTCTATTCAAGAGATAGAGCACGAGAAGCTCAGGAGTTTTTGTct  
cgagctggcgaattcc  
>CD\_NM\_001078.2:995  
CgCtGcgagtctGGtatGCGGAGTTAATTTGATTGGGAATTCAAGAGATTCCTCAATCAAATTAACCTTTTTTGTct  
cgagctggcgaattcc  
>CD\_NM\_001078.2:2106  
CgCtGcgagtctGGtatGACGGGAGTATATGAATGTGAATTTC AAGAGAATTCACATTCATATACTCCCGCTTTTTTGTct  
cgagctggcgaattcc  
>CD\_NM\_001078.2:2252  
CgCtGcgagtctGGtatGCGCCATTGGAATGATAATTTACTTCAAGAGAGTAAATTATCATTCCAATGGCATTTTTTTGTct  
cgagctggcgaattcc  
>CD\_NM\_001078.2:2298  
CgCtGcgagtctGGtatGAGGTCATATAGTCTTGTAGAAGTTCAAGAGACTTCTACAAGACTATATGACCCTTTTTTGTct  
cgagctggcgaattcc  
>CD\_NM\_001078.2:1972

CgCctGcgagtctGGtatGATGTCATCATCTCTTGTACATGTTCAAGAGACATGTACAAGAGATGATGACAGTTTTTGct  
cgagctggcgaattcc  
>CD\_NM\_001078.2:525  
CgCctGcgagtctGGtatGCAGTGTTTCAGTTGCTGATGTATTTCAAGAGAATACATCAGCAACTGAACACTTTTTTTGct  
cgagctggcgaattcc  
>CD\_NM\_001078.2:622  
CgCctGcgagtctGGtatGAAGACAGGAAGTCCCTGGAACTTCAAGAGAGTTTCCAGGGACTTCCCTGTCTGTTTTTGct  
cgagctggcgaattcc  
>CD\_NM\_001078.2:2207  
CgCctGcgagtctGGtatGCCCTGAGCTTCTCGTGCTCTATTTCAAGAGAATAGAGCACGAGAAGCTCAGGATTTTTTGct  
cgagctggcgaattcc  
>CD\_NM\_001078.2:238  
CgCctGcgagtctGGtatGATGACTCCGTCTCATTGACTTGTTCAGAGACAAGTCAATGAGACGGAGTCACTTTTTTGct  
cgagctggcgaattcc  
>CD\_NM\_001078.2:902  
CgCctGcgagtctGGtatGCTTAGATAATGGGAATCTACAGTTCAAGAGACTGTAGATTCCCATTATCTAATTTTTTGct  
cgagctggcgaattcc  
>CD\_NM\_001078.2:1703  
CgCctGcgagtctGGtatGCTCTGTGAATATGACATGCTTGTTCAGAGACAAGCATGTCATATTCACAGAATTTTTTGct  
cgagctggcgaattcc  
>CD\_NM\_001078.2:566  
CgCctGcgagtctGGtatGAATAGACTTACTGAAAGGAGATTTCAAGAGAATCTCCTTTCAGTAAGTCTATTTTTTGct  
cgagctggcgaattcc  
>CD\_NM\_001078.2:1312  
CgCctGcgagtctGGtatGCGGAGCTTACTCATTCCTAGTTCAAGAGACTAGGGAATGAGTAGAGCTCCATTTTTTGct  
cgagctggcgaattcc  
>CD\_NM\_001078.2:1785  
CgCctGcgagtctGGtatGAAGCCTCTTCTGAGAATGCAATTCAGAGATTGCATTCTCAGAAAGAGGCTGTTTTTGct  
cgagctggcgaattcc  
>CD\_NM\_001078.2:1272  
CgCctGcgagtctGGtatGATGACTTGTGGACATAAGAACTTCAAGAGAGTTTCTTATGTCCACAAGTCACTTTTTTGct  
cgagctggcgaattcc  
>CD\_NM\_001078.2:2069  
CgCctGcgagtctGGtatGCGGCGCCTATACCATCCGAAAGTTCAAGAGACTTTCGGATGGTATAGGCGCCATTTTTTGct  
cgagctggcgaattcc  
>CD\_NM\_001078.2:347  
CgCctGcgagtctGGtatGAACATCTACGCTGACAATGAATTTCAAGAGAATTCATTGTCAGCGTAGATGTGTTTTTGct  
cgagctggcgaattcc  
>CD\_NM\_001078.2:1944  
CgCctGcgagtctGGtatGACTTCTGAGAGTGTCAAAGAAGTTCAAGAGACTTCTTTGACACTCTCAGAAGGTTTTTGct  
cgagctggcgaattcc  
>CD\_NM\_001078.2:966  
CgCctGcgagtctGGtatGCTGGAAGATTCTGGAATTTATGTTCAAGAGACATAAATTCAGAAATCTCCATTTTTTGct  
cgagctggcgaattcc  
>CD\_NM\_001078.2:1883  
CgCctGcgagtctGGtatGAAGAAAGGAAGTGAATTAATTTTCAAGAGAAATTAATTCACCTTCTTTCTGTTTTTGct  
cgagctggcgaattcc  
>CD\_NM\_001078.2:551  
CgCctGcgagtctGGtatGCTTTGACAGGCTGGAGATAGACTTCAAGAGAGTCTATCTCCAGCCTGTCAAATTTTTTGct  
cgagctggcgaattcc  
>CD\_NM\_001078.2:1797  
CgCctGcgagtctGGtatGAAGAATGCAACTCTCACCTTAATTCAGAGATTAAGGTGAGAGTTGCATTCTTTTTTGct  
cgagctggcgaattcc  
>CD\_NM\_001078.2:730

CgCctGcgagtctGGtatGCGGATTCTGTGCCACAGTAAGTTCAAGAGACTTACTGTGGGCACAGAATCCATTTTTGct  
cgagctggcgaattcc  
>CD\_NM\_005561:486  
CgCctGcgagtctGGtatGCCACTCTCAATTTACGAGAAATTTCAAGAGATTTCTCGTGAAATTGAGAGTGATTTTTGct  
cgagctggcgaattcc  
>CD\_NM\_005561:292  
CgCctGcgagtctGGtatGCGGCAACGGGACCGCTGCATATTTCAAGAGATATGCACGCGGTCCCGTTGCCATTTTTGct  
cgagctggcgaattcc  
>CD\_NM\_005561:474  
CgCctGcgagtctGGtatGAAGGACATACACTCACTCTCAATTTCAAGAGATTGAGAGTGAGTGTATGTCCTTTTTGct  
cgagctggcgaattcc  
>CD\_NM\_005561.2:486  
CgCctGcgagtctGGtatGAACTCTCAATTTACGAGAAATTTCAAGAGAATTTCTCGTGAAATTGAGAGTGTTTTGct  
cgagctggcgaattcc  
>CD\_NM\_005561.2:1123  
CgCctGcgagtctGGtatGACCAGAGACCCTGCCTTTAAAGTTCAAGAGACTTTAAAGGCAGGGTCTCTGGCTTTTTGct  
cgagctggcgaattcc  
>CD\_NM\_005561.2:474  
CgCctGcgagtctGGtatGCGGACATACACTCACTCTCAATTTCAAGAGAATTGAGAGTGAGTGTATGTCCTTTTTGct  
cgagctggcgaattcc  
>CD\_NM\_005561.2:1008  
CgCctGcgagtctGGtatGAACTCTGGAGCTGCACAGCGAGTTCAAGAGACTCGCTGTGCAGCTCCAGAGTCTTTTTGct  
cgagctggcgaattcc  
>CD\_NM\_005561.2:942  
CgCctGcgagtctGGtatGAACAAGGCTTCTCAACATCAACTTTCAAGAGAGTTGATGTTGAGAAGCCTTGTCTTTTTGct  
cgagctggcgaattcc  
>CD\_NM\_005561.2:591  
CgCctGcgagtctGGtatGCATCAAGACTGTGGAATCTATATTTCAAGAGATATAGATTCCACAGTCTTGATTTTTGct  
cgagctggcgaattcc  
>CD\_NM\_005561.2:267  
CgCctGcgagtctGGtatGCGCAGCCATGTTTATGGTGAAATTTCAAGAGATTTACCATAAACATGGCTGCTTTTTGct  
cgagctggcgaattcc  
>CD\_NM\_005561.2:936  
CgCctGcgagtctGGtatGAACGGTGACAAGGCTTCTCAACTTTCAAGAGAGTTGAGAAGCCTTGTACCGTCTTTTTGct  
cgagctggcgaattcc  
>CD\_NM\_005561.2:1092  
CgCctGcgagtctGGtatGCGGAATCCAGTTGAATACAATTTTTCAAGAGAAATTTGATTCAACTGGATTCCTTTTTGct  
cgagctggcgaattcc  
>CD\_NM\_005561.2:597  
CgCctGcgagtctGGtatGAACTGTGGAATCTATAACTGACTTTCAAGAGAGTCAGTTATAGATTCCACAGTCTTTTTGct  
cgagctggcgaattcc  
>CD\_NM\_005561.2:1002  
CgCctGcgagtctGGtatGACTGGTGACTCTGGAGCTGCACTTTCAAGAGAGTGCAGCTCCAGAGTACCAGGTTTTGct  
cgagctggcgaattcc  
>CD\_NM\_005561.2:375  
CgCctGcgagtctGGtatGAACCTTTGACCTGCCATCAGATTTCAAGAGAATCTGATGGCAGGTCAAAGGTCTTTTTGct  
cgagctggcgaattcc  
>CD\_NM\_005561.2:657  
CgCctGcgagtctGGtatGCGGCACCCAGGTCCACATGAACTTTCAAGAGAGTTCATGTGGACCTGGGTGCCATTTTTGct  
cgagctggcgaattcc  
>CD\_NM\_005561.2:660  
CgCctGcgagtctGGtatGAACCCAGGTCCACATGAACTTTCAAGAGAGTTGTTTCATGTGGACCTGGGTGTTTTGct  
cgagctggcgaattcc  
>CD\_NM\_005561.2:1236

CgCctGcgagtctGGtatGCTCAGTCAATATATTTCAAAGTGTTC AAGAGACACTTTGAATATATTGACTGAATTTTTGct  
cgagctggcgaattcc  
>CD\_NM\_005561.2:1238  
CgCctGcgagtctGGtatGAAGTCAATATATTTCAAAGTGTTC AAGAGACACACTTTGAATATATTGACTGTTTTTgct  
cgagctggcgaattcc  
>CD\_NM\_005561.2:1260  
CgCctGcgagtctGGtatGAGTCCAGGCTTTC AAGGTGGAATTC AAGAGATTCACCTTGAAAGCCTGGACCTTTTTGct  
cgagctggcgaattcc  
>CD\_NM\_005561.2:330  
CgCctGcgagtctGGtatGCGCCTTCTCAGTGAAC TACGACTTCAAGAGAGTCGTAGTTCACTGAGAAGGCATTTTTGct  
cgagctggcgaattcc  
>CD\_NM\_005561.2:1178  
CgCctGcgagtctGGtatGAAGTCGGCAATTCCTACAAGTGTTC AAGAGACACTTGTAGGAATTGCCGACTGTTTTTgct  
cgagctggcgaattcc  
>CD\_NM\_005561.2:902  
CgCctGcgagtctGGtatGCGCTGAACCTCACCTATGAGAGTTCAAGAGACTCTCATAGGTGAGGTT CAGCTTTTTTgct  
cgagctggcgaattcc  
>CD\_NM\_005561.2:1302  
CgCctGcgagtctGGtatGAGAGGAGTGTCTGCTGGACGAGTTCAAGAGACTCGTCCAGCAGACACTCCTCCTTTTTGct  
cgagctggcgaattcc  
>CD\_NM\_005561.2:305  
CgCctGcgagtctGGtatGAGTGCATAATGGCCAAC TTTCTCTTCAAGAGAGAGAAGTTGGCCATTATGCACGTTTTTgct  
cgagctggcgaattcc  
>CD\_NM\_005561.2:1419  
CgCctGcgagtctGGtatGAGCAGGCTACCAGACTATCTAGTTCAAGAGACTAGATAGTCTGGTAGCCTGCGTTTTTgct  
cgagctggcgaattcc  
>CD\_NM\_005561.2:1043  
CgCctGcgagtctGGtatGCGCTCTTCCAGTTCCGGATGAATTC AAGAGATTCATCCCGAACTGGAAGAGCATTTTTGct  
cgagctggcgaattcc  
>CD\_NM\_005561.2:410  
CgCctGcgagtctGGtatGCCAACCGCAGCTCCTGTGGAAATTC AAGAGATTTCCACAGGAGCTGCGGTTGATTTTTGct  
cgagctggcgaattcc  
>CD\_NM\_005561.2:260  
CgCctGcgagtctGGtatGCGTCGTCAGCAGCCATGTTTTATTTCAAGAGAATAAACATGGCTGCTGACGACATTTTTGct  
cgagctggcgaattcc  
>CD\_NM\_005561.2:996  
CgCctGcgagtctGGtatGAGCCCACCTGGTGACTCTGGAGTTCAAGAGACTCCAGAGTCAACCAGGTGGGCGTTTTTgct  
cgagctggcgaattcc  
>CD\_NM\_005561.2:324  
CgCctGcgagtctGGtatGATCTGCTGCCTTCTCAGTGAAC TTC AAGAGAGTTCACTGAGAAGGCAGCAGAGTTTTTgct  
cgagctggcgaattcc  
>CD\_NM\_005561.2:266  
CgCctGcgagtctGGtatGAAGCAGCCATGTTTATGGTGAATTC AAGAGATTCACCATAAACATGGCTGCTGTTTTTgct  
cgagctggcgaattcc  
>CD\_NM\_005561.2:1121  
CgCctGcgagtctGGtatGCCGCCAGAGACCTGCCTTTAATTC AAGAGATTAAGGCAGGGTCTCTGGCGTTTTTgct  
cgagctggcgaattcc  
>CD\_NM\_002294:208  
CgCctGcgagtctGGtatGCGGGTCTTATGCATTGGAAC TTTCAAGAGAAGTTCCAATGCATAAGACCGCATTTTTGct  
cgagctggcgaattcc  
>CD\_NM\_002294:209  
CgCctGcgagtctGGtatGACGGTCTTATGCATTGGAAC TTTTCAAGAGAAAGTTCCAATGCATAAGACCGCTTTTTGct  
cgagctggcgaattcc  
>CD\_NM\_002294:292

CgCctGcgagtctGGtatGCACGCTATGAAACTACAAATAATTCAAGAGATTATTTGTAGTTTCATAGCGTATTTTTGct  
cgagctggcgaattcc  
>CD\_NM\_002294:447  
CgCctGcgagtctGGtatGCAGGCAGCATCTACTTATTCAATTCAAGAGATTGAATAAGTAGATGCTGCCTTTTTTTGct  
cgagctggcgaattcc  
>CD\_NM\_002294:793  
CgCctGcgagtctGGtatGCAGCTGGAACCTATTTCAGTTAATTCAAGAGATTAACGAATAGGTTCCAGCTTTTTTTGct  
cgagctggcgaattcc  
>CD\_NM\_002294:796  
CgCctGcgagtctGGtatGATGGAACCTATTTCAGTTAATAATTCAAGAGATTATTAACGAATAGGTTCCAGTTTTTTGct  
cgagctggcgaattcc  
>CD\_NM\_002294.1:512  
CgCctGcgagtctGGtatGCTTCCTGATGCTGAAGATAAAGTTCAAGAGACTTTATCTTCAGCATCAGGAAATTTTTGct  
cgagctggcgaattcc  
>CD\_NM\_002294.1:282  
CgCctGcgagtctGGtatGCTTTCACAGTACGCTATGAAACTTCAAGAGAGTTTCATAGCGTACTGTGAAATTTTTTTGct  
cgagctggcgaattcc  
>CD\_NM\_002294.1:446  
CgCctGcgagtctGGtatGCAGGCAGCATCTACTTATTCAATTCAAGAGATTGAATAAGTAGATGCTGCCTTTTTTTGct  
cgagctggcgaattcc  
>CD\_NM\_002294.1:211  
CgCctGcgagtctGGtatGATCTTATGCATTGGAACCTAATTTCAAGAGAATTAAGTTCCAATGCATAAGACTTTTTTTGct  
cgagctggcgaattcc  
>CD\_NM\_002294.1:1145  
CgCctGcgagtctGGtatGATTTTCAGTGTCTGGAGCATTTCTTCAAGAGAGAAATGCTCCAGACACTGAAACTTTTTTTGct  
cgagctggcgaattcc  
>CD\_NM\_002294.1:685  
CgCctGcgagtctGGtatGAACAAATGAGTTCCTGTGTGATTTCAAGAGAATCACACAGGAACTCATTGTGTTTTTTGct  
cgagctggcgaattcc  
>CD\_NM\_002294.1:350  
CgCctGcgagtctGGtatGATGACATATAATGGAAGCATTTTTTCAAGAGAAAATGCTTCCATTATATGTCACTTTTTTGct  
cgagctggcgaattcc  
>CD\_NM\_002294.1:206  
CgCctGcgagtctGGtatGATGCGGTCTTATGCATTGGAACCTCAAGAGAGTTCCAATGCATAAGACCGCACTTTTTTTGct  
cgagctggcgaattcc  
>CD\_NM\_002294.1:979  
CgCctGcgagtctGGtatGCCTAGACTTTGTCTTTGCTGTGTTCAAGAGACACAGCAAAGACAAAGTCTAGATTTTTTTGct  
cgagctggcgaattcc  
>CD\_NM\_002294.1:506  
CgCctGcgagtctGGtatGCCAACATTTCTGATGCTGAAGTTCAAGAGACTTCAGCATCAGGAAATGTTGTTTTTTGct  
cgagctggcgaattcc  
>CD\_NM\_002294.1:1193  
CgCctGcgagtctGGtatGAAGCCTTTCAATGTGACACAAGTTCAAGAGACTTGTGTACATTGAAAGGCTGTTTTTTGct  
cgagctggcgaattcc  
>CD\_NM\_002294.1:981  
CgCctGcgagtctGGtatGCAGACTTTGTCTTTGCTGTGAATTCAAGAGATTCACAGCAAAGACAAAGTCTATTTTTTTGct  
cgagctggcgaattcc  
>CD\_NM\_002294.1:1107  
CgCctGcgagtctGGtatGACCTGGGAAGTCTTATATGTGTTCAAGAGACACATATAAGAACTTCCCAGGGTTTTTTGct  
cgagctggcgaattcc  
>CD\_NM\_002294.1:340  
CgCctGcgagtctGGtatGACATGGCACTGTGACATATAATTTCAAGAGAATTATATGTCACAGTGCCATGGTTTTTTGct  
cgagctggcgaattcc  
>CD\_NM\_002294.1:638

CgCctGcgagtctGGtatGCACTGGGATGTTCTTGTACAAGTTCAAGAGACTTGTACAAGAACATCCCAGTATTTTTGct  
cgagctggcgaattcc  
>CD\_NM\_002294.1:932  
CgCctGcgagtctGGtatGAGTTCTCACACTGCTCTACTTATTCAAGAGATAAGTAGAGCAGTGTGAGAACGTTTTTGct  
cgagctggcgaattcc  
>CD\_NM\_002294.1:344  
CgCctGcgagtctGGtatGAGCACTGTGACATATAATGGAATTC AAGAGATTCATTATATGTCACAGTGCCTTTTTGct  
cgagctggcgaattcc  
>CD\_NM\_002294.1:1154  
CgCctGcgagtctGGtatGCCTGGAGCATTT CAGATAAATATTCAAGAGATATTTATCTGAAATGCTCCAGATTTTTGct  
cgagctggcgaattcc  
>CD\_NM\_002294.1:619  
CgCctGcgagtctGGtatGAAATGATGTTGTCCAACACTACTTCAAGAGAGTAGTGTGGACAACATCATCTTTTTGct  
cgagctggcgaattcc  
>CD\_NM\_002294.1:1114  
CgCctGcgagtctGGtatGCAGTTCTTATATGTGCAACAAATTCAAGAGATTTGTTGCACATATAAGAACTTTTTTGct  
cgagctggcgaattcc  
>CD\_NM\_002294.1:746  
CgCctGcgagtctGGtatGCCTGTGCCATCTCCTACTACAATTCAAGAGATTGTAGTAGGAGATGGCACAGTTTTTGct  
cgagctggcgaattcc  
>CD\_NM\_002294.1:877  
CgCctGcgagtctGGtatGAGTTGCTTCAGTTATTAACATCTTCAAGAGAGATGTTAATAACTGAAGCAACCTTTTTGct  
cgagctggcgaattcc  
>CD\_NM\_002294.1:1203  
CgCctGcgagtctGGtatGCTGTGACACAAGGAAAGTATTCTTCAAGAGAGAATACTTTCTTGTGTCACATTTTTTGct  
cgagctggcgaattcc  
>CD\_NM\_002294.1:1149  
CgCctGcgagtctGGtatGAAGTGTCTGGAGCATTT CAGATTTCAAGAGAATCTGAAATGCTCCAGACACTGTTTTTGct  
cgagctggcgaattcc  
>CD\_NM\_002294.1:1035  
CgCctGcgagtctGGtatGCCATCAGCATGTATTTGGTTAATTCAAGAGATTAACCAAATACATGCTGATGTTTTTGct  
cgagctggcgaattcc  
>CD\_NM\_002294.1:596  
CgCctGcgagtctGGtatGCATAGTTTATCAACTTTGGAAATTCAAGAGATTTCCAAAGTTGATAAACTATTTTTTGct  
cgagctggcgaattcc  
>CD\_NM\_002294.1:511  
CgCctGcgagtctGGtatGCTTTCTGATGCTGAAGATAAATTCAAGAGATTTATCTTCAGCATCAGGAAATTTTTTGct  
cgagctggcgaattcc  
>CD\_NM\_003612:1353  
CgCctGcgagtctGGtatGAAGCACAGCTTCGCCTTCAACATTCAAGAGATGTTGAAGGCGAAGCTGTGCTTTTTTGct  
cgagctggcgaattcc  
>CD\_NM\_003612:1592  
CgCctGcgagtctGGtatGCCGGTCAGTGTGCAATCCATTTTCAAGAGAAATGGATTGCAGCACTGACCGTTTTTGct  
cgagctggcgaattcc  
>CD\_NM\_003612:330  
CgCctGcgagtctGGtatGCACGCATCTGTGCGCACGGTGATTCAAGAGATCACCGTGCACAGATGCGTTTTTTGct  
cgagctggcgaattcc  
>CD\_NM\_003612:1211  
CgCctGcgagtctGGtatGAACGCCATTGTTCCACTCTAAATTCAAGAGATTTAGAGTGAACAATGGCGTCTTTTTTGct  
cgagctggcgaattcc  
>CD\_NM\_003612.1:658  
CgCctGcgagtctGGtatGAAGTGATACTGTCATGCAGA ACTTCAAGAGAGTTCTGCATGACAGTATCACTGTTTTTGct  
cgagctggcgaattcc  
>CD\_NM\_003612.1:840



CgCctGcgagtctGGtatGAACTGTCAGTCTCCAAGTGAATTCAAGAGATTCCACTTGGAGACTGACAGTGTTTTTGct  
cgagctggcgaattcc  
>CD\_NM\_003612.1:1563  
CgCctGcgagtctGGtatGACCGCTGCATCTCCATCTACAGTTCAAGAGACTGTAGATGGAGATGCAGCGCTTTTTGct  
cgagctggcgaattcc  
>CD\_NM\_003612.1:1924  
CgCctGcgagtctGGtatGAGCCGAGCACCTGCTGGGTCAATTTCAAGAGAATGACCCAGCAGGTGCTCGGCCTTTTTGct  
cgagctggcgaattcc  
>CD\_NM\_003612.1:1027  
CgCctGcgagtctGGtatGCTCCCTCGGTGACATTGACAAGTTCAAGAGACTTGTCAATGTCACCGAGGGAATTTTTGct  
cgagctggcgaattcc  
>CD\_NM\_003612.1:1050  
CgCctGcgagtctGGtatGCCTTCCGTACCTCCTCACTCAATTCAAGAGATTGAGTGAGGAGGTACGGAAGATTTTTGct  
cgagctggcgaattcc  
>CD\_NM\_003612.1:1353  
CgCctGcgagtctGGtatGCGCACAGCTTCGCCTTCAACATTTCAAGAGAATGTTGAAGGCGAAGCTGTGCTTTTTGct  
cgagctggcgaattcc  
>CD\_NM\_003612.1:345  
CgCctGcgagtctGGtatGAGGTGAATATCGGCTCCACAAATTTCAAGAGATTTGTGGAGCCGATATTCACCGTTTTGct  
cgagctggcgaattcc  
>CD\_NM\_003612.1:1018  
CgCctGcgagtctGGtatGATGTGTGTATTCCCTCGGTGACTTCAAGAGAGTCCCGAGGGAATACACACAGTTTTGct  
cgagctggcgaattcc  
>CD\_NM\_003612.1:1211  
CgCctGcgagtctGGtatGCCGCCATTGTTCCACTCTAAATTTCAAGAGAATTTAGAGTGGAACAATGGCGTTTTGct  
cgagctggcgaattcc  
>CD\_NM\_003612.1:770  
CgCctGcgagtctGGtatGCATCCTGAGGCTCCTCTCAATGTTCAAGAGACATTGAGAGGAGCTCAGGATTTTTGct  
cgagctggcgaattcc  
>CD\_NM\_003612.1:1282  
CgCctGcgagtctGGtatGAACCTTTCATGTGCTTTACCTATTCAAGAGATAGGTAAAGCACATGAAAGGCTTTTTGct  
cgagctggcgaattcc  
>CD\_NM\_003612.1:846  
CgCctGcgagtctGGtatGAAGTCTCCAAGTGAACACTTTTTCAAGAGAAAAGTGTTCCTTGGAGACTGTTTTTGct  
cgagctggcgaattcc  
>CD\_NM\_003612.1:781  
CgCctGcgagtctGGtatGCCCTCTCAATGTGTCCCGTGTGTTCAAGAGACACACGGGACACATTGAGAGGATTTTTGct  
cgagctggcgaattcc  
>CD\_NM\_003612.1:1363  
CgCctGcgagtctGGtatGAGCCTTCAACATCATGGAGATCTTCAAGAGAGATCTCCATGATGTTGAAGGCGTTTTGct  
cgagctggcgaattcc  
>CD\_NM\_003612.1:718  
CgCctGcgagtctGGtatGAGCTTACGATGACAAGATCTACTTCAAGAGAGTAGATCTTGTTCATCGTAAGCCTTTTTGct  
cgagctggcgaattcc  
>CD\_NM\_003612.1:1993  
CgCctGcgagtctGGtatGAACTCTTGGCTTGCTGGTCCACTTCAAGAGAGTGGACCAGCAAGCCAAGAGTGTTTTTGct  
cgagctggcgaattcc  
>CD\_NM\_003612.1:1414  
CgCctGcgagtctGGtatGAACCATGTGCTGGATGCTGAGTTCAAGAGACTCAGCATCCAGCGACATGGTCTTTTTGct  
cgagctggcgaattcc  
>CD\_NM\_003612.1:1800  
CgCctGcgagtctGGtatGCCTGCATCCTGTTTCATCGAGAATTTCAAGAGATTTCTCGATGAACAGGATGCAGTTTTGct  
cgagctggcgaattcc  
>CD\_NM\_003612.1:1012

CgCctGcgagtctGGtatGCGCCGTCTGTGTGTATTCCCTCTTCAAGAGAGAGGGAATACACACAGACGGCTTTTTTTGct  
cgagctggcgaattcc  
>CD\_NM\_003612.1:1057  
CgCctGcgagtctGGtatGCACCTCCTCACTCAAGGGCTACTTCAAGAGAGTAGCCCTTGAGTGAGGAGGTATTTTTTGct  
cgagctggcgaattcc  
>CD\_NM\_003612.1:889  
CgCctGcgagtctGGtatGAAGTGATGCTGCCACCAACAAGTTCAAGAGACTTGTGGTGGCAGCATCACTGTTTTTTGct  
cgagctggcgaattcc  
>CD\_NM\_003612.1:545  
CgCctGcgagtctGGtatGCACTCCCTGGTTCGTGTTGAAGTTCAAGAGACTTCAAACAGAACCAGGGAGTTTTTTTTGct  
cgagctggcgaattcc  
>CD\_NM\_003612.1:1624  
CgCctGcgagtctGGtatGACCACACAAGGAGTGTCCCAACTTCAAGAGAGTTGGGACACTCCTTGTGTGGCTTTTTTTGct  
cgagctggcgaattcc  
>CD\_NM\_003612.1:1177  
CgCctGcgagtctGGtatGAGCGCAGAGGGTGGAGCCCATGTTCAAGAGACATGGGCTCCACCCTCTGCGCTTTTTTTGct  
cgagctggcgaattcc  
>CD\_NM\_003612.1:289  
CgCctGcgagtctGGtatGCCGTGGCAAGGTCTACCTCTTTTTTCAAGAGAAAAGAGGTAGACCTTGCCACGTTTTTTTTGct  
cgagctggcgaattcc  
>CD\_NM\_003612.1:1996  
CgCctGcgagtctGGtatGCCTTGCTTGTGGTCCACTAGTTCAAGAGACTAGTGGACCAGCAAGCCAAGATTTTTTTGct  
cgagctggcgaattcc  
>CD\_NM\_003612.1:1813  
CgCctGcgagtctGGtatGAATCGAGAACCCTCACGGCGCAGTTCAAGAGACTGCGCCGTGAGGTTCTCGATGTTTTTTGct  
cgagctggcgaattcc  
>CD\_NM\_003612.1:1434  
CgCctGcgagtctGGtatGCGCGGAGGAAGCTGTATGTGAGTTCAAGAGACTCACATACAGCTTCTCCGCTTTTTTTGct  
cgagctggcgaattcc  
>CD\_NM\_133493:1442  
CgCctGcgagtctGGtatGCAGGCCTATTTCCCTGGTAGTATTCAAGAGATACTACCAAGGAAATAGGCCTTTTTTTTGct  
cgagctggcgaattcc  
>CD\_NM\_133493:1696  
CgCctGcgagtctGGtatGCGCCTGTGTAATTGTGTATTATTTCAAGAGAATAATACACAATTACACAGGCTTTTTTTGct  
cgagctggcgaattcc  
>CD\_NM\_133493:1940  
CgCctGcgagtctGGtatGATGGTCCATGAGTTGGAACTTTTTCAAGAGAAAAGTTCCAACCTCATGGACCACTTTTTTGct  
cgagctggcgaattcc  
>CD\_NM\_133493:3105  
CgCctGcgagtctGGtatGCAGCCGATCCTTACATAGATATTTCAAGAGAAATATCTATGTAAGGATCGGCTTTTTTTGct  
cgagctggcgaattcc  
>CD\_NM\_133493:3515  
CgCctGcgagtctGGtatGCGGCAGCCACGCTCCCTGGATATTCAAGAGATATCCAGGGAGCGTGGCTGCCATTTTTTTGct  
cgagctggcgaattcc  
>CD\_NM\_133493:1695  
CgCctGcgagtctGGtatGCAGCCTGTGTAATTGTGTATTATTTCAAGAGATAATACACAATTACACAGGCTTTTTTTGct  
cgagctggcgaattcc  
>CD\_NM\_133493.1:2755  
CgCctGcgagtctGGtatGCTCTCATTTCCTCCTAATACAGTTCAAGAGACTGTATTAGGAGGAAATGAGAATTTTTTTGct  
cgagctggcgaattcc  
>CD\_NM\_133493.1:641  
CgCctGcgagtctGGtatGCACAGTGGTTGTCACAACAAAGTTCAAGAGACTTTGTTGTGACAACCCTGTTTTTTTTGct  
cgagctggcgaattcc  
>CD\_NM\_133493.1:3682

CgCctGcgagtctGGtatGATGTCTGAATTTGCAGCCCTAATTCAAGAGATTAGGGCTGCAAATTCAGACAGTTTTTGGct  
cgagctggcgaattcc  
>CD\_NM\_133493.1:4275  
CgCctGcgagtctGGtatGAAGACAGGCGGTGAGAAGTTACTTCAAGAGAGTAACTTCTCACCGCTGTCTTTTTTGGct  
cgagctggcgaattcc  
>CD\_NM\_133493.1:1125  
CgCctGcgagtctGGtatGCAGCACTAATGTGTTCTTCAAGTTCAAGAGACTTGAAGAACACATTAGTGCTTTTTTGGct  
cgagctggcgaattcc  
>CD\_NM\_133493.1:1649  
CgCctGcgagtctGGtatGCTTCAACAATGTTCTCTTTAACTTCAAGAGAGTTAAAGAGAACATTGTTGAATTTTTTGGct  
cgagctggcgaattcc  
>CD\_NM\_133493.1:2590  
CgCctGcgagtctGGtatGATGGGAGAAATTCCTATCACAGTTCAAGAGACTGTGATAGGAATTTCTCCCAGTTTTTGGct  
cgagctggcgaattcc  
>CD\_NM\_133493.1:1849  
CgCctGcgagtctGGtatGATGACACAGCCTGACTCCATAGTTCAAGAGACTATGGAGTCAGGCTGTGTCACTTTTTGGct  
cgagctggcgaattcc  
>CD\_NM\_133493.1:513  
CgCctGcgagtctGGtatGCACAGACAAGGCCTTATACAAGTTCAAGAGACTTGTATAAGGCCTTGTCTGTTTTTGGct  
cgagctggcgaattcc  
>CD\_NM\_133493.1:2486  
CgCctGcgagtctGGtatGCTCTAATGACTTCAAATGAAATTTCAAGAGAATTTCAATTTGAAGTCATTAGAATTTTTTGGct  
cgagctggcgaattcc  
>CD\_NM\_133493.1:2371  
CgCctGcgagtctGGtatGATTCCCTACTCTGTTATCAGAGTTCAAGAGACTCTGATAACAGAGTAGGGAAGTTTTTGGct  
cgagctggcgaattcc  
>CD\_NM\_133493.1:4205  
CgCctGcgagtctGGtatGATGTGAGAACTTTAAAGTTTCTTCAAGAGAGAACTTTAAAGTTTCTCACAGTTTTTGGct  
cgagctggcgaattcc  
>CD\_NM\_133493.1:3676  
CgCctGcgagtctGGtatGCAGGCTCTGTCTGAATTTGCAGTTCAAGAGACTGCAAATTCAGACAGAGCCTTTTTTGGct  
cgagctggcgaattcc  
>CD\_NM\_133493.1:3557  
CgCctGcgagtctGGtatGCGCTCTCACACTTCTTACAATTTTCAAGAGAAATTTGTAAGAAGTGTGAGAGCATTTTTTGGct  
cgagctggcgaattcc  
>CD\_NM\_133493.1:1243  
CgCctGcgagtctGGtatGCACCAACTGACTCTTGAAGAAATTTCAAGAGATTTCTTCAAGAGTCAGTTGGTTTTTGGct  
cgagctggcgaattcc  
>CD\_NM\_133493.1:2392  
CgCctGcgagtctGGtatGAGTGAAGAATTTGCTTTGGAAATTTCAAGAGATTTCCAAAGCAAATTTCTCACCTTTTTTGGct  
cgagctggcgaattcc  
>CD\_NM\_133493.1:316  
CgCctGcgagtctGGtatGATCACTGTCTCTGTCTGGAAGTTCAAGAGACTTCCAGGACAGAGACAGTGAGTTTTTGGct  
cgagctggcgaattcc  
>CD\_NM\_133493.1:3267  
CgCctGcgagtctGGtatGCGTAACTTCTCTCCTGGGATATTTCAAGAGAATATCCCAGGAGAGAAGTTACATTTTTTGGct  
cgagctggcgaattcc  
>CD\_NM\_133493.1:3824  
CgCctGcgagtctGGtatGCACAGCCAATGGCAGTTAATATTTCAAGAGAATATTAAGTCCATTGGCTGTATTTTTTGGct  
cgagctggcgaattcc  
>CD\_NM\_133493.1:3834  
CgCctGcgagtctGGtatGAGCAGTTAATATTTCCGCAAATTTCAAGAGAATTTGCGGAAATATTAAGTGCCTTTTTTGGct  
cgagctggcgaattcc  
>CD\_NM\_133493.1:1473

CgCctGcgagtctGGtatGAGCAGTTCATAGTCTGTTTAAAGTTCAAGAGACTTAAACAGACTATGAACTGCCTTTTTTGct  
cgagctggcgaattcc  
>CD\_NM\_133493.1:600  
CgCctGcgagtctGGtatGCTTAAACATTCTCATTAAAGGACTTCAAGAGAGTCCCTTAATGAGAATGTTTAAATTTTTGct  
cgagctggcgaattcc  
>CD\_NM\_133493.1:1484  
CgCctGcgagtctGGtatGATCTGTTTAAAGTCTCCTAGTAATTCAAGAGATTACTAGGAGACTTAAACAGACTTTTTTGct  
cgagctggcgaattcc  
>CD\_NM\_133493.1:2067  
CgCctGcgagtctGGtatGCGGTGTTTATGACAATGCAGAATTCAAGAGATTCTGCATTGTCATAAACACCATTTTTGct  
cgagctggcgaattcc  
>CD\_NM\_133493.1:3596  
CgCctGcgagtctGGtatGCCCAATTATGAGGTGGCTAAGTTCAAGAGACTTAGCCACCTCATAATTGGGATTTTTGct  
cgagctggcgaattcc  
>CD\_NM\_133493.1:1286  
CgCctGcgagtctGGtatGAAGTGACACAGAGAACTATACTTCAAGAGAGTATAGTTTCTCTGTGTCACTGTTTTTGct  
cgagctggcgaattcc  
>CD\_NM\_133493.1:367  
CgCctGcgagtctGGtatGCAGACACTTACTCTTCCATCACTTCAAGAGAGTGATGGAAGAGTAAGTGTCTTTTTTGct  
cgagctggcgaattcc  
>CD\_NM\_005373:1107  
CgCctGcgagtctGGtatGAAAGTCACGAAATGACAGCATTTTTCAAGAGAAATGCTGTCATTTTCGTGACTTGTTTTTGct  
cgagctggcgaattcc  
>CD\_NM\_005373:1702  
CgCctGcgagtctGGtatGCAGGCCACAGTCTCAGATACCTTTCAAGAGAAGGTATCTGAGACTGTGGCCTTTTTTGct  
cgagctggcgaattcc  
>CD\_NM\_005373:1157  
CgCctGcgagtctGGtatGACCCGGGTACTGTTACAGCTATTCAAGAGATAGCTGTGAACAGTACCCGGGGTTTTTGct  
cgagctggcgaattcc  
>CD\_NM\_005373:157  
CgCctGcgagtctGGtatGATGAAGTGTCTCCCGAACATTTCAAGAGAATGTTCCGGGAGAAACACTTCAGTTTTTGct  
cgagctggcgaattcc  
>CD\_NM\_005373:693  
CgCctGcgagtctGGtatGACCCTGGCAAGATGGACCAAAGTTCAAGAGACTTTGGTCCATCTTGCCAGGGCTTTTTGct  
cgagctggcgaattcc  
>CD\_NM\_005373:1398  
CgCctGcgagtctGGtatGACGCCCGGATCTCGCTACCGTTTTCAAGAGAACGGTAGCGAGATCGCGGGCGCTTTTTGct  
cgagctggcgaattcc  
>CD\_NM\_005373:361  
CgCctGcgagtctGGtatGACGCTGCACCTCTGGGTGAAGATTCAAGAGATCTTACCCAGAGGTGCAGCGGTTTTTGct  
cgagctggcgaattcc  
>CD\_NM\_005373.1:1510  
CgCctGcgagtctGGtatGACGCCTGGATCTCCTTGGTGACTTCAAGAGAGTACCAAGGAGATCCAGGCGGTTTTTGct  
cgagctggcgaattcc  
>CD\_NM\_005373.1:1876  
CgCctGcgagtctGGtatGATGAGTCAGGGTCCGTGTACTTCAAGAGAGTACAGCAGGACCCTGACTCAGTTTTTGct  
cgagctggcgaattcc  
>CD\_NM\_005373.1:374  
CgCctGcgagtctGGtatGAGTGAAGAATGTGTTCCCTAAACTTCAAGAGAGTTTAGGAACACATTCTTACCTTTTTGct  
cgagctggcgaattcc  
>CD\_NM\_005373.1:1250  
CgCctGcgagtctGGtatGAAGTGGGCATCTGGAATTGGAGTTCAAGAGACTCCAATTCCAGATGCCCACTGTTTTTGct  
cgagctggcgaattcc  
>CD\_NM\_005373.1:189

CgCctGcgagtctGGtatGCCTTGCTTCTGGGATGAGGAAGTTCAAGAGACTTCCTCATCCCAGAAGCAAGTTTTTTGct  
cgagctggcgaattcc  
>CD\_NM\_005373.1:899  
CgCctGcgagtctGGtatGAGCACTTGGACTGCAATGCTTTTTCAAGAGAAAAGCATTGCAGTCCAAGTGCCTTTTTGct  
cgagctggcgaattcc  
>CD\_NM\_005373.1:1157  
CgCctGcgagtctGGtatGACCGGGTACTGTTACAGCTACTTCAAGAGAGTAGCTGTGAACAGTACCCGGGTTTTTGct  
cgagctggcgaattcc  
>CD\_NM\_005373.1:1704  
CgCctGcgagtctGGtatGACCACAGTCTCAGATACCTGTGTTCAAGAGACACAGGTATCTGAGACTGTGGCTTTTTGct  
cgagctggcgaattcc  
>CD\_NM\_005373.1:598  
CgCctGcgagtctGGtatGCACAGCTGATTGCCACAGAACTTCAAGAGAGTTTCTGTGGCAATCAGCTGTATTTTTGct  
cgagctggcgaattcc  
>CD\_NM\_005373.1:860  
CgCctGcgagtctGGtatGATCCCTCCCTGTGACTGTGGACTTCAAGAGAGTCCACAGTCACAGGGAGGGACTTTTTGct  
cgagctggcgaattcc  
>CD\_NM\_005373.1:872  
CgCctGcgagtctGGtatGAACTGTGGACCTGCCTGGAGATTTCAAGAGAATCTCCAGGCAGGTCCACAGTCTTTTTGct  
cgagctggcgaattcc  
>CD\_NM\_005373.1:404  
CgCctGcgagtctGGtatGAACTCAGCGAGTCTCTTTGTGTTCAAGAGACACAAAGAGGACTCGCTGAGTCTTTTTGct  
cgagctggcgaattcc  
>CD\_NM\_005373.1:1852  
CgCctGcgagtctGGtatGACCTGTCTGTGTGCCACCCATTTCAAGAGAATGGGTGGGCACACAGACAGGGTTTTTGct  
cgagctggcgaattcc  
>CD\_NM\_005373.1:159  
CgCctGcgagtctGGtatGCAGTGTTTCTCCCGAACATTTGTTCAAGAGACAAATGTTCCGGGAGAAACACTTTTTTTGct  
cgagctggcgaattcc  
>CD\_NM\_005373.1:1107  
CgCctGcgagtctGGtatGCAGTCACGAAATGACAGCATTATTCAAGAGATAATGCTGTCAATTTCTGACTTTTTTTGct  
cgagctggcgaattcc  
>CD\_NM\_005373.1:359  
CgCctGcgagtctGGtatGCCCCTGCACCTCTGGGTGAAGTTCAAGAGACTTCACCCAGAGGTGCAGCGGATTTTTGct  
cgagctggcgaattcc  
>CD\_NM\_005373.1:524  
CgCctGcgagtctGGtatGCATCAGTGATTTCTGAGGTACTTCAAGAGAGTACCTCAGGAAATCACTGATTTTTTTGct  
cgagctggcgaattcc  
>CD\_NM\_005373.1:1702  
CgCctGcgagtctGGtatGCGGCCACAGTCTCAGATACCTGTTCAAGAGACAGGTATCTGAGACTGTGGCTTTTTTTGct  
cgagctggcgaattcc  
>CD\_NM\_005373.1:1112  
CgCctGcgagtctGGtatGCCGAAATGACAGCATTATCACTTCAAGAGAGTGAATAATGCTGTCAATTTCTGTTTTTTGct  
cgagctggcgaattcc  
>CD\_NM\_005373.1:1087  
CgCctGcgagtctGGtatGCGTTCTCTCGCTGCCACTTCAATTCAAGAGATTGAAGTGGCAGCGAGAGAACTTTTTTTGct  
cgagctggcgaattcc  
>CD\_NM\_005373.1:584  
CgCctGcgagtctGGtatGCGGTCCCACGGTCATACAGCTGTTCAAGAGACAGCTGTATGACCGTGGGACCATTTTTTTGct  
cgagctggcgaattcc  
>CD\_NM\_005373.1:1710  
CgCctGcgagtctGGtatGATCTCAGATACCTGTGAAGAAGTTCAAGAGACTTCTTCACAGGTATCTGAGACTTTTTTTGct  
cgagctggcgaattcc  
>CD\_NM\_005373.1:527

CgCtGcgagtctGGtatGAAGTGATTTCTGAGGTACGAATTCAAGAGATTCGTACCTCAGGAAATCACTGTTTTTGct  
cgagctggcgaattcc  
>CD\_NM\_005373.1:1796  
CgCtGcgagtctGGtatGATCCCAGGCCAGATGGACTACTTCAAGAGAGTAGTCCATCTGGGCCTGGGAGTTTTTGct  
cgagctggcgaattcc  
>CD\_NM\_005373.1:976  
CgCtGcgagtctGGtatGACCAAGGCTTCTTCTACCACAGTTCAAGAGACTGTGGTAGAAGAAGCCTTGGGTTTTTGct  
cgagctggcgaattcc  
>CD\_NM\_005373.1:1646  
CgCtGcgagtctGGtatGACTGCACCGGGTCTTAGGCCAGTTCAAGAGACTGGCCTAGGACCCGGTGCAGTTTTTGct  
cgagctggcgaattcc  
>CD\_NM\_002855:475  
CgCtGcgagtctGGtatGACCCTCCTTACCGATGGCACTTCAAGAGAAGTGCCATCGGTGAAGGAGGGCTTTTTGct  
cgagctggcgaattcc  
>CD\_NM\_002855:527  
CgCtGcgagtctGGtatGAAGGGTGTCTACATCTGCGAGTTTCAAGAGAACTCGCAGATGTAGACACCCTTTTTGct  
cgagctggcgaattcc  
>CD\_NM\_002855:677  
CgCtGcgagtctGGtatGATGGCCACCTGCACCTCAGCCATTCAAGAGATGGCTGAGGTGCAGGTGGCCACTTTTTGct  
cgagctggcgaattcc  
>CD\_NM\_002855:959  
CgCtGcgagtctGGtatGCTGGACGTGAAGCTCACCTGCATTCAAGAGATGCAGGTGAGCTTACGTCCATTTTTGct  
cgagctggcgaattcc  
>CD\_NM\_002855:1619  
CgCtGcgagtctGGtatGAACCGGACTCTGGGCTACCAGTTTCAAGAGAACTGGTAGCCAGAGTCCGGTCTTTTTGct  
cgagctggcgaattcc  
>CD\_NM\_002855:1649  
CgCtGcgagtctGGtatGAAGCAGCTGGACTTGGCTGAGATTCAAGAGATCTCAGCCAAGTCCAGCTGCTTTTTGct  
cgagctggcgaattcc  
>CD\_NM\_002855.3:888  
CgCtGcgagtctGGtatGAACTCTCAACGTGCAGTATGAGTTCAAGAGACTCATACTGCACGTTGAGAGTTTTTGct  
cgagctggcgaattcc  
>CD\_NM\_002855.3:1662  
CgCtGcgagtctGGtatGAGCTGAGAACATGGTTTCTCAGTTCAAGAGACTGAGAAACCATGTTCTCAGCCTTTTTGct  
cgagctggcgaattcc  
>CD\_NM\_002855.3:882  
CgCtGcgagtctGGtatGCAGCCTCACTCTCAACGTGCAGTTCAAGAGACTGCACGTTGAGAGTGAGGCTTTTTGct  
cgagctggcgaattcc  
>CD\_NM\_002855.3:258  
CgCtGcgagtctGGtatGATCCCAGGTGGTCCAGGTGAACTTCAAGAGAGTTCACCTGGACCACCTGGGAGTTTTGct  
cgagctggcgaattcc  
>CD\_NM\_002855.3:507  
CgCtGcgagtctGGtatGACGCCTGGAGCTGGAGGATGAGTTCAAGAGACTCATCCTCCAGCTCCAGGCGTTTTGct  
cgagctggcgaattcc  
>CD\_NM\_002855.3:1146  
CgCtGcgagtctGGtatGATCAGGCCAGGTGGAGGTCAATTTCAAGAGAATTGACCTCCACCTGGCCTGAGTTTTGct  
cgagctggcgaattcc  
>CD\_NM\_002855.3:1314  
CgCtGcgagtctGGtatGACGGCACACCTTCAAGGGTGACTTCAAGAGAGTACCCTTGAAGGTGTGCCGTTTTGct  
cgagctggcgaattcc  
>CD\_NM\_002855.3:585  
CgCtGcgagtctGGtatGAAATCTCACGGTGATGGCCAAATTCAAGAGATTTGGCCATCACCGTGAGATTTTTTGct  
cgagctggcgaattcc  
>CD\_NM\_002855.3:836

CgCctGcgagtctGGtatGCGTCCTTGGCCTGCATCGTCAATTCAAGAGATTGACGATGCAGGCCAAGGACTTTTTTgct  
cgagctggcgaattcc  
>CD\_NM\_002855.3:1619  
CgCctGcgagtctGGtatGCCCCGACTCTGGGCTACCAGTATTCAAGAGATACTGGTAGCCCAGAGTCCGGTTTTTgct  
cgagctggcgaattcc  
>CD\_NM\_002855.3:1686  
CgCctGcgagtctGGtatGAGACGGGTCTTTCATTTCCAAGTTCAAGAGACTTGGAAATGAAAGACCCGTCGTTTTTgct  
cgagctggcgaattcc  
>CD\_NM\_002855.3:542  
CgCctGcgagtctGGtatGACGAGTTTGCTACCTTCCCTACTTCAAGAGAGTAGGGAAGGTAGCAAACCTCGTTTTTgct  
cgagctggcgaattcc  
>CD\_NM\_002855.3:1329  
CgCctGcgagtctGGtatGAGGTGACTACAGCACCAAGAAGTTCAAGAGACTTCTTGGTGCTGTAGTCACCCTTTTTgct  
cgagctggcgaattcc  
>CD\_NM\_002855.3:395  
CgCctGcgagtctGGtatGCGCAGAACGTGGCCATCTACAATTCAAGAGATTGTAGATGGCCACGTTCTGCTTTTTTgct  
cgagctggcgaattcc  
>CD\_NM\_002855.3:840  
CgCctGcgagtctGGtatGATTGGCCTGCATCGTCAACTACTTCAAGAGAGTAGTTGACGATGCAGGCCAAGTTTTTgct  
cgagctggcgaattcc  
>CD\_NM\_002855.3:899  
CgCctGcgagtctGGtatGCGCAGTATGAGCCTGAGGTAACCTTCAAGAGAGTTACCTCAGGCTCATACTGCATTTTTTgct  
cgagctggcgaattcc  
>CD\_NM\_002855.3:1350  
CgCctGcgagtctGGtatGACACGTGTATGGCAACGGCTACTTCAAGAGAGTAGCCGTTGCCATACACGTGCTTTTTTgct  
cgagctggcgaattcc  
>CD\_NM\_002855.3:960  
CgCctGcgagtctGGtatGAGACGTGAAGCTCACCTGCAAATTTCAAGAGATTTGCAGGTGAGCTTACGTCCTTTTTTgct  
cgagctggcgaattcc  
>CD\_NM\_002855.3:278  
CgCctGcgagtctGGtatGCCGACTCCATGTATGGCTTCATTTCAAGAGAATGAAGCCATACATGGAGTCGTTTTTgct  
cgagctggcgaattcc  
>CD\_NM\_002855.3:538  
CgCctGcgagtctGGtatGCTCTGCGAGTTTGCTACCTTCTTCAAGAGAGGAAGGTAGCAAACCTCGCAGATTTTTTgct  
cgagctggcgaattcc  
>CD\_NM\_002855.3:948  
CgCctGcgagtctGGtatGACTGCAGCGGATGGACGTGAAGTTCAAGAGACTTACGTCATCCGCTGCAGGTTTTTgct  
cgagctggcgaattcc  
>CD\_NM\_002855.3:1260  
CgCctGcgagtctGGtatGAATCCTGCTGGTGTGATTGTGTTCAAGAGACACAATCAACACCAGCAGGATGTTTTTgct  
cgagctggcgaattcc  
>CD\_NM\_002855.3:1101  
CgCctGcgagtctGGtatGAGCAGGGACCTACATCTGTGAGTTCAAGAGACTCACAGATGTAGGTCCCTGCCTTTTTTgct  
cgagctggcgaattcc  
>CD\_NM\_002855.3:528  
CgCctGcgagtctGGtatGAGGTGTCTACATCTGCGAGTTTTTCAAGAGAAAACCTCGCAGATGTAGACACCCTTTTTTgct  
cgagctggcgaattcc  
>CD\_NM\_002855.3:776  
CgCctGcgagtctGGtatGCTGGCACAGTGACGGTCATCAGTTCAAGAGACTGATGACCGTCACTGTGCCATTTTTTgct  
cgagctggcgaattcc  
>CD\_NM\_002855.3:475  
CgCctGcgagtctGGtatGACCTCCTTACCGATGGCACTATTCAAGAGATAGTGCCATCGGTGAAGGAGGGTTTTTgct  
cgagctggcgaattcc  
>CD\_NM\_002855.3:555

CgCtGcgagtctGGtatGATTCCCTACGGGCAATCGAGAATTCAAGAGATTCTCGATTGCCCGTAGGGAAGTTTTTGct  
cgagctggcgaattcc  
>CD\_NM\_002856:318  
CgCtGcgagtctGGtatGATGCCACCTGTTCTGGACTGTTTCAAGAGAACAGTCCAGGAACAGGTGGCAGTTTTTGct  
cgagctggcgaattcc  
>CD\_NM\_002856:370  
CgCtGcgagtctGGtatGCTGCACCTGCGAACCACCAGAATTCAAGAGATTCTGGTGGTTCGCAGGTGCATTTTTTGct  
cgagctggcgaattcc  
>CD\_NM\_002856:453  
CgCtGcgagtctGGtatGAGGCTGTCTTCGTCTCTGCCATTCAAGAGATGGCAGAGACGAAGGACAGCCGTTTTTGct  
cgagctggcgaattcc  
>CD\_NM\_002856:552  
CgCtGcgagtctGGtatGAAGGGCAACTTACTTGCAGTTTTCAAGAGAACTCGCAAGTGTAGTTGCCCTTTTTTGct  
cgagctggcgaattcc  
>CD\_NM\_002856:722  
CgCtGcgagtctGGtatGCGCCCGATCTCTGGCTCTCATTCAAGAGATGAGAGCCAGGAGATCCGGGCATTTTTTGct  
cgagctggcgaattcc  
>CD\_NM\_002856:844  
CgCtGcgagtctGGtatGCTGGTGTACGGTACCTGCAATTCAAGAGATTGCAGGTGACCGTGACACCATTTTTTGct  
cgagctggcgaattcc  
>CD\_NM\_002856:1099  
CgCtGcgagtctGGtatGCCGCAGTGGACAGTCTGTTCAATTCAAGAGATTGAACAGACTGTCCACTGCGTTTTTGct  
cgagctggcgaattcc  
>CD\_NM\_002856.1:610  
CgCtGcgagtctGGtatGATGGCTCAGAGTCATAGCCAAGTTCAAGAGACTTGGCTATGACTCTGAGCCAGTTTTTGct  
cgagctggcgaattcc  
>CD\_NM\_002856.1:238  
CgCtGcgagtctGGtatGCGCCAGGATGTGCGAGTTCAATTCAAGAGATTGAACTCGCACATCTGGGCTTTTTTGct  
cgagctggcgaattcc  
>CD\_NM\_002856.1:250  
CgCtGcgagtctGGtatGACGAGTTCAAGTGCTACCCGAGTTCAAGAGACTCGGGTAGCACTTGAACCTCGTTTTTGct  
cgagctggcgaattcc  
>CD\_NM\_002856.1:1104  
CgCtGcgagtctGGtatGCGGACAGTCTGTTCAATACCCTTCAAGAGAGTGGTATTGAACAGACTGTCCATTTTTTGct  
cgagctggcgaattcc  
>CD\_NM\_002856.1:1165  
CgCtGcgagtctGGtatGAGCTGAGCAGGTCATCTTTGTCTTCAAGAGAGACAAAGATGACCTGCTCAGCGTTTTTGct  
cgagctggcgaattcc  
>CD\_NM\_002856.1:1486  
CgCtGcgagtctGGtatGAGCAGAGAAAGGCCTCATGTTGTTCAAGAGACAACATGAGGCCTTCTCTGCCTTTTTTGct  
cgagctggcgaattcc  
>CD\_NM\_002856.1:844  
CgCtGcgagtctGGtatGCGGTGTACGGTACCTGCAAATTCAAGAGATTTGCAGGTGACCGTGACACCATTTTTTGct  
cgagctggcgaattcc  
>CD\_NM\_002856.1:333  
CgCtGcgagtctGGtatGAACTGTACATCTCCCTGGTGACTTCAAGAGAGTACCAGGGAGATGTACAGTCTTTTTTGct  
cgagctggcgaattcc  
>CD\_NM\_002856.1:447  
CgCtGcgagtctGGtatGACGAGCGGCTGTCTTCGTCTCTTCAAGAGAGAGACGAAGGACAGCCGCTCGTTTTTGct  
cgagctggcgaattcc  
>CD\_NM\_002856.1:720  
CgCtGcgagtctGGtatGATGCCCGGATCTCTGGCTCTCTTCAAGAGAGAGAGCCAGGAGATCCGGGCAGTTTTTGct  
cgagctggcgaattcc  
>CD\_NM\_002856.1:758



CgCctGcgagtctGGtatGACCAAAGAGACTCAGGTGTCAGTTCAAGAGACTGACACCTGAGTCTCTTTGGCTTTTTTGct  
cgagctggcgaattcc  
>CD\_NM\_002856.1:684  
CgCctGcgagtctGGtatGAAGTGGCCCTCTGCATCTCCAATTC AAGAGATTGGAGATGCAGAGGGCCACTGTTTTTGct  
cgagctggcgaattcc  
>CD\_NM\_002856.1:1378  
CgCctGcgagtctGGtatGAAAAGCTCAGGTGTTGGGAAATTTCAAGAGAATTTCCCAACACCTGAGCTTCTTTTTTGct  
cgagctggcgaattcc  
>CD\_NM\_002856.1:743  
CgCctGcgagtctGGtatGCCCCTGGACTGGGAAGCCAAAGTTCAAGAGACTTTGGCTTCCCAGTCCAGGGATTTTTGct  
cgagctggcgaattcc  
>CD\_NM\_002856.1:856  
CgCctGcgagtctGGtatGAACCTGCAAAGTGGAGCATGAGTTCAAGAGACTCATGCTCCACTTTGCAGGTGTTTTGct  
cgagctggcgaattcc  
>CD\_NM\_002856.1:616  
CgCctGcgagtctGGtatGAAGAGTCATAGCCAAGCCAAAGTTCAAGAGACTTGGGCTTGCTATGACTCTGTTTTGct  
cgagctggcgaattcc  
>CD\_NM\_002856.1:946  
CgCctGcgagtctGGtatGAGGCTATGATGACAAC TGGTACTTCAAGAGAGTACCAGTTGTCATCATAGCCGTTTTGct  
cgagctggcgaattcc  
>CD\_NM\_002856.1:532  
CgCctGcgagtctGGtatGAGGGCTCACGGTGGAGGACGAGTTCAAGAGACTCGTCCTCCACCGTGAGCCGTTTTGct  
cgagctggcgaattcc  
>CD\_NM\_002856.1:1122  
CgCctGcgagtctGGtatGACACCTTCGTCTGCACAGTCACTTCAAGAGAGTGACTGTGCAGACGAAGGTGGTTTTGct  
cgagctggcgaattcc  
>CD\_NM\_002856.1:1568  
CgCctGcgagtctGGtatGAGGCGGGCAGTTTATGTGTGACTTCAAGAGAGTCACACATAAACTGCCCGCCGTTTTGct  
cgagctggcgaattcc  
>CD\_NM\_002856.1:1429  
CgCctGcgagtctGGtatGACCTGGTCCCATGGAACCAGATTTCAAGAGAATCTGGTTCCATGGGACCAGGGTTTTGct  
cgagctggcgaattcc  
>CD\_NM\_002856.1:665  
CgCctGcgagtctGGtatGCTCAGCCAGGACCCTACGACAGTTCAAGAGACTGTCGTAGGGTCTGGCTGAATTTTTGct  
cgagctggcgaattcc  
>CD\_NM\_002856.1:688  
CgCctGcgagtctGGtatGAGCCCTCTGCATCTCAAAGAGTTCAAGAGACTCTTTGGAGATGCAGAGGGCCTTTTTGct  
cgagctggcgaattcc  
>CD\_NM\_002856.1:1099  
CgCctGcgagtctGGtatGAGCAGTGGACAGTCTGTTCAATTTCAAGAGAATTGAACAGACTGTCCACTGCGTTTTGct  
cgagctggcgaattcc  
>CD\_NM\_002856.1:747  
CgCctGcgagtctGGtatGCGGACTGGGAAGCCAAAGAGACTTCAAGAGAGTCTCTTTGGCTTCCCAGTCCATTTTTGct  
cgagctggcgaattcc  
>CD\_NM\_002856.1:1366  
CgCctGcgagtctGGtatGCTTCTACGATCCGAAAGCTCAGTTCAAGAGACTGAGCTTTCGGATCGTAGAATTTTTGct  
cgagctggcgaattcc  
>CD\_NM\_015480:615  
CgCctGcgagtctGGtatGATGGGAAGGTGATCTTGGTGAATTC AAGAGATTCACCAAGATCACCTTCCCAGTTTTGct  
cgagctggcgaattcc  
>CD\_NM\_015480:723  
CgCctGcgagtctGGtatGCAGGCGAATTACTTGTGTTGATTCAAGAGATACAACACAAGTAATTCGCCTTTTTTGct  
cgagctggcgaattcc  
>CD\_NM\_015480:814

CgCctGcgagtctGGtatGCCGGTAACAGGATATGATGGAATTCAAGAGATTCCATCATATCCTGTTACCGATTTTTTGct  
cgagctggcgaattcc  
>CD\_NM\_015480:854  
CgCctGcgagtctGGtatGCAGGTGTTAATCTCAAATGTAATTCAAGAGATTACATTTGAGATTAACACCTTTTTTTGct  
cgagctggcgaattcc  
>CD\_NM\_015480:973  
CgCctGcgagtctGGtatGATCCATCCATTGACTTTCAATTTTCAAGAGAAATTGAAAGTCAATGGATGGACTTTTTTGct  
cgagctggcgaattcc  
>CD\_NM\_015480:1132  
CgCctGcgagtctGGtatGAAGGATCTAGCAACAGAACCTATTCAAGAGATAGGTTCTGTTGCTAGATCCTCTTTTTTGct  
cgagctggcgaattcc  
>CD\_NM\_015480:724  
CgCctGcgagtctGGtatGCGGCGAATTACTTGTGTTGTAATTCAAGAGATTACAACACAAGTAATTCGCCTTTTTTTGct  
cgagctggcgaattcc  
>CD\_NM\_015480:326  
CgCctGcgagtctGGtatGCTGGATTCTCTGTTCAAGGAGATTCAAGAGATCTCCTTGAACAGAGAATCCATTTTTTTGct  
cgagctggcgaattcc  
>CD\_NM\_015480.1:854  
CgCctGcgagtctGGtatGCGGTGTTAATCTCAAATGTAATTTCAAGAGAATTACATTTGAGATTAACACCTTTTTTTGct  
cgagctggcgaattcc  
>CD\_NM\_015480.1:147  
CgCctGcgagtctGGtatGCCAGGCTCTGTGGTGCCTTAGTTCAAGAGACTAAGGCACCACAGAGCCTGGATTTTTTTGct  
cgagctggcgaattcc  
>CD\_NM\_015480.1:768  
CgCctGcgagtctGGtatGCTCCGATACTCTTTCATATTAGTTCAAGAGACTAATATGAAAGAGTATCGGATTTTTTTGct  
cgagctggcgaattcc  
>CD\_NM\_015480.1:485  
CgCctGcgagtctGGtatGCACTGTAACGTGTTAGTTGAATTCAAGAGATTCAACTAACACAGTTACAGTTTTTTTTGct  
cgagctggcgaattcc  
>CD\_NM\_015480.1:770  
CgCctGcgagtctGGtatGACGATACTCTTTCATATTAGACTTCAAGAGAGTCTAATATGAAAGAGTATCGGTTTTTTGct  
cgagctggcgaattcc  
>CD\_NM\_015480.1:789  
CgCctGcgagtctGGtatGAACATACAGTATGCTCCTGAAGTTCAAGAGACTTCAAGGAGCATACTGTATGTCTTTTTTTGct  
cgagctggcgaattcc  
>CD\_NM\_015480.1:987  
CgCctGcgagtctGGtatGCTCAATTATCTGGTGTTTATATTCAAGAGATATAAACACCAGAATAATTGAATTTTTTTGct  
cgagctggcgaattcc  
>CD\_NM\_015480.1:392  
CgCctGcgagtctGGtatGCACAATTACTCTGCATAACATATTCAAGAGATATGTTATGCAGAGTAATTGTTTTTTTTGct  
cgagctggcgaattcc  
>CD\_NM\_015480.1:1267  
CgCctGcgagtctGGtatGATGGAATATCTGCTATAGGAGTTCAAGAGACTCCTATAGCAGAATATCCAGTTTTTTGct  
cgagctggcgaattcc  
>CD\_NM\_015480.1:375  
CgCctGcgagtctGGtatGCACTCACTTAATGATGCAACAATTCAAGAGATTGTTGCATCATTAAGTGAGTATTTTTTTGct  
cgagctggcgaattcc  
>CD\_NM\_015480.1:324  
CgCctGcgagtctGGtatGCATGGATTCTCTGTTCAAGGAGTTCAAGAGACTCCTTGAACAGAGAATCCATTTTTTTGct  
cgagctggcgaattcc  
>CD\_NM\_015480.1:1430  
CgCctGcgagtctGGtatGCGTGAACAATCTAATACGTAAATTCAAGAGATTTACGTATTAGATTGTTCACTTTTTTTGct  
cgagctggcgaattcc  
>CD\_NM\_015480.1:293

CgCctGcgagtctGGtatGCTCACAGACTGTTGCAGTTCACCTCAAGAGAGTGAACAGTCTGTGAATTTTTGct  
cgagctggcgaattcc  
>CD\_NM\_015480.1:1326  
CgCctGcgagtctGGtatGCTTCCACCATCAGATATGCAAATTCAGAGATTTGCATATCTGATGGTGAATTTTTGct  
cgagctggcgaattcc  
>CD\_NM\_015480.1:534  
CgCctGcgagtctGGtatGAATTTTAAATGATGGAGGAATTCAGAGATTCCTCCATCAATTAAGAATCTTTTTGct  
cgagctggcgaattcc  
>CD\_NM\_015480.1:1000  
CgCctGcgagtctGGtatGATGTTTATATCTGTAAAGTGACTTCAAGAGAGTCACTTTACAGATATAAACACTTTTTGct  
cgagctggcgaattcc  
>CD\_NM\_015480.1:261  
CgCctGcgagtctGGtatGAAGATTTTCATGGGAGAAGATACTTCAAGAGAGTATCTTCTCCCATGAAATCTGTTTTGct  
cgagctggcgaattcc  
>CD\_NM\_015480.1:1264  
CgCctGcgagtctGGtatGCGGCTGGAATATTCTGCTATAGTTCAAGAGACTATAGCAGAATATTCAGCCATTTTTGct  
cgagctggcgaattcc  
>CD\_NM\_015480.1:1521  
CgCctGcgagtctGGtatGCTGGATTATTATGAAGATCTAATTCAGAGATTAGATCTTCATAATAATCCATTTTTGct  
cgagctggcgaattcc  
>CD\_NM\_015480.1:237  
CgCctGcgagtctGGtatGCTTGAAGTAAATGAAACCATAATTCAGAGATTATGGTTTCATTTACTTCAATTTTTGct  
cgagctggcgaattcc  
>CD\_NM\_015480.1:505  
CgCctGcgagtctGGtatGCACCCACTGTGAGCCTGATAAATTCAGAGATTTATCAGGCTCACAGTGGGTTTTTTGct  
cgagctggcgaattcc  
>CD\_NM\_015480.1:690  
CgCctGcgagtctGGtatGCACAAGCTATTTCCAACCAGATTTCAAGAGAATCTGGTTGAAATAGCTTGATTTTTGct  
cgagctggcgaattcc  
>CD\_NM\_015480.1:546  
CgCctGcgagtctGGtatGAATGGAGGAAATGAAACAGTAGTTCAAGAGACTACTGTTTCATTTCTCCATCTTTTTGct  
cgagctggcgaattcc  
>CD\_NM\_015480.1:326  
CgCctGcgagtctGGtatGCGGATTCTCTGTTCAAGGAGAATTCAGAGATTTCTCCTTGAACAGAGAATCCATTTTTGct  
cgagctggcgaattcc  
>CD\_NM\_015480.1:398  
CgCctGcgagtctGGtatGCACTCTGCATAACATAGGATTCTTCAAGAGAGAATCCTATGTTATGCAGAGTATTTTTGct  
cgagctggcgaattcc  
>CD\_NM\_000760:637  
CgCctGcgagtctGGtatGAACCAGCTTCACTCTGAAGAGTTTCAAGAGAACTCTTCAGAGTGAAGCTGGTGTTTTTGct  
cgagctggcgaattcc  
>CD\_NM\_000760:943  
CgCctGcgagtctGGtatGCTGGCAGCCAGGCCTGCACATATTCAGAGATATGTGCAGGCCTGGCTGCCATTTTTGct  
cgagctggcgaattcc  
>CD\_NM\_000760:944  
CgCctGcgagtctGGtatGCGGCAGCCAGGCCTGCACATAATTCAGAGATTATGTGCAGGCCTGGCTGCCATTTTTGct  
cgagctggcgaattcc  
>CD\_NM\_000760:1661  
CgCctGcgagtctGGtatGCGGCCCTTTCAGCTCTATGAGATTCAAGAGATCTCATAGAGCTGAAAGGCCTTTTTGct  
cgagctggcgaattcc  
>CD\_NM\_000760:2293  
CgCctGcgagtctGGtatGACCGGTGCCCTGGGAGTCCCATTTCAAGAGAATGGGACTCCCAGGGCACCGGCTTTTTGct  
cgagctggcgaattcc  
>CD\_NM\_000760:2294

CgCctGcgagtctGGtatGACGGTGCCCTGGGAGTCCCATATTCAAGAGATATGGGACTCCCAGGGCACCGGTTTTTgct  
cgagctggcgaattcc  
>CD\_NM\_156039:637  
CgCctGcgagtctGGtatGAACCAGCTTCACTCTGAAGAGTTTCAAGAGAACTCTTCAGAGTGAAGCTGGTGTTTTTGct  
cgagctggcgaattcc  
>CD\_NM\_156039:943  
CgCctGcgagtctGGtatGCTGGCAGCCAGGCCTGCACATATTCAAGAGATATGTGCAGGCCTGGCTGCCATTTTTTgct  
cgagctggcgaattcc  
>CD\_NM\_156039:1661  
CgCctGcgagtctGGtatGCGGCCCTTTCAGCTCTATGAGATTCAAGAGATCTCATAGAGCTGAAAGGGCCTTTTTgct  
cgagctggcgaattcc  
>CD\_NM\_156039:2293  
CgCctGcgagtctGGtatGACCGGTGCCCTGGGAGTCCCATTTCAAGAGAATGGGACTCCCAGGGCACCGGCTTTTTGct  
cgagctggcgaattcc  
>CD\_NM\_156039:752  
CgCctGcgagtctGGtatGAACCTGCTGTTGTACCAGAATATTCAAGAGATATTCTGGTACAACAGCAGGTGTTTTTGct  
cgagctggcgaattcc  
>CD\_NM\_156039:1391  
CgCctGcgagtctGGtatGAAGGTGGCCCTTGTGGCCTATATTCAAGAGATATAGGCCACAAGGGCCACCTTTTTTgct  
cgagctggcgaattcc  
>CD\_NM\_000760.2:1719  
CgCctGcgagtctGGtatGATCCCAGCATGTCTATGCCTACTTCAAGAGAGTAGGCATAGACATGCTGGGAGTTTTTgct  
cgagctggcgaattcc  
>CD\_NM\_000760.2:1227  
CgCctGcgagtctGGtatGAACAGTGCAGCTGTTCTGGAAGTTCAAGAGACTTCCAGAACAGCTGCACTGTCTTTTTGct  
cgagctggcgaattcc  
>CD\_NM\_000760.2:1436  
CgCctGcgagtctGGtatGATCCGGTGGTCTTCTCAGAAAGTTCAAGAGACTTCTGAGAAGACCACCGGAGTTTTTgct  
cgagctggcgaattcc  
>CD\_NM\_000760.2:185  
CgCctGcgagtctGGtatGAGCTGGGAAACTGCAGCCTGACTTCAAGAGAGTCAGGCTGCAGTTTCCAGCCTTTTTGct  
cgagctggcgaattcc  
>CD\_NM\_000760.2:2469  
CgCctGcgagtctGGtatGCGGGCACTATCTCCGCTGTGACTTCAAGAGAGTCACAGCGGAGATAGTGCCCTTTTTTgct  
cgagctggcgaattcc  
>CD\_NM\_000760.2:639  
CgCctGcgagtctGGtatGAAGCTTCACTCTGAAGAGTTTCTTCAAGAGAGAACTCTTCAGAGTGAAGCTGTTTTTGct  
cgagctggcgaattcc  
>CD\_NM\_000760.2:749  
CgCctGcgagtctGGtatGCACACCTGCTGTTGTACCAGAATTCAAGAGATTCTGGTACAACAGCAGGTGTTTTTTgct  
cgagctggcgaattcc  
>CD\_NM\_000760.2:554  
CgCctGcgagtctGGtatGACCACAACCTCTCCTGCCTCATTTCAAGAGAATGAGGCAGGAGAGGTTGTGGGTTTTTgct  
cgagctggcgaattcc  
>CD\_NM\_000760.2:1950  
CgCctGcgagtctGGtatGACCCGCCAGTCTGTATCACATCTTCAAGAGAGATGTGATACAGACTGGCGGGCTTTTTGct  
cgagctggcgaattcc  
>CD\_NM\_000760.2:1859  
CgCctGcgagtctGGtatGCCTACACCATCTTCTGGACCAATTCAAGAGATTGGTCCAGAAGATGGTGTAGTTTTTgct  
cgagctggcgaattcc  
>CD\_NM\_000760.2:840  
CgCctGcgagtctGGtatGAATGGATGTTGTGAAACTGGAGTTCAAGAGACTCCAGTTTCAACAACATCCATGTTTTTGct  
cgagctggcgaattcc  
>CD\_NM\_000760.2:401

CgCctGcgagtctGGtatGCGCAGCGTCTGTCTGATGGGACTTCAAGAGAGTCCCATCAGACAGACGCTGCTTTTTTGct  
cgagctggcgaattcc  
>CD\_NM\_000760.2:828  
CgCctGcgagtctGGtatGATGTCTTGATCCCATGGATGTTTTCAAGAGAAACATCCATGGGATCAAGACACTTTTTTGct  
cgagctggcgaattcc  
>CD\_NM\_000760.2:2297  
CgCctGcgagtctGGtatGCGCCCTGGGAGTCCCATAACAGTTCAAGAGACTGTTATGGGACTCCCAGGGCATTTTTTGct  
cgagctggcgaattcc  
>CD\_NM\_000760.2:2013  
CgCctGcgagtctGGtatGCGTCTCACCCTGATGACCTTGTTCAAGAGACAAGGTCATCAGGGTGAGGACTTTTTTGct  
cgagctggcgaattcc  
>CD\_NM\_000760.2:632  
CgCctGcgagtctGGtatGCACCCACCAGCTTCACTCTGAATTCAAGAGATTCAGAGTGAAGCTGGTGGGTATTTTTGct  
cgagctggcgaattcc  
>CD\_NM\_000760.2:1091  
CgCctGcgagtctGGtatGCGCAGATACGCTGCATCCGCTGTTCAAGAGACAGCGGATGCAGCGTATCTGCATTTTTGct  
cgagctggcgaattcc  
>CD\_NM\_000760.2:1661  
CgCctGcgagtctGGtatGAGCCCTTTCAGCTCTATGAGATTTCAAGAGAATCTCATAGAGCTGAAAGGGCCTTTTTGct  
cgagctggcgaattcc  
>CD\_NM\_000760.2:1439  
CgCctGcgagtctGGtatGAGGTGGTCTTCTCAGAAAGCAGTTCAAGAGACTGCTTTCTGAGAAGACCACCGTTTTTGct  
cgagctggcgaattcc  
>CD\_NM\_000760.2:351  
CgCctGcgagtctGGtatGACCACAGATTCTGTGGAGACTGTTCAAGAGACAGTCTCCACAGAATCTGTGGCTTTTTGct  
cgagctggcgaattcc  
>CD\_NM\_000760.2:498  
CgCctGcgagtctGGtatGAAGCCTGCAGATCCTGGACCAGTTCAAGAGACTGGTCCAGGATCTGCAGGCTTTTTTGct  
cgagctggcgaattcc  
>CD\_NM\_005211:970  
CgCctGcgagtctGGtatGAAGCAGCGTTGATGTTAACTTTTTCAAGAGAAAAGTTAACATCAACGCTGCTTTTTTGct  
cgagctggcgaattcc  
>CD\_NM\_005211:972  
CgCctGcgagtctGGtatGACAGCGTTGATGTTAACTTTGATTTCAAGAGATCAAAGTTAACATCAACGCTGCTTTTTTGct  
cgagctggcgaattcc  
>CD\_NM\_005211:1953  
CgCctGcgagtctGGtatGCGAGCTATGAGGGCAACAGTTATTCAAGAGATAACTGTTGCCCTCATAGCTTTTTTGct  
cgagctggcgaattcc  
>CD\_NM\_005211:576  
CgCctGcgagtctGGtatGACGCCATCCACCTCTATGTCAATTCAAGAGATTGACATAGAGGTGGATGGCGGTTTTTGct  
cgagctggcgaattcc  
>CD\_NM\_005211:2471  
CgCctGcgagtctGGtatGCGGCCTGTCTCCACTTCTTCAATTCAAGAGATTGAAGAAGTGGAGACAGGCCTTTTTTGct  
cgagctggcgaattcc  
>CD\_NM\_005211:2174  
CgCctGcgagtctGGtatGAAGGCCCTCATGTCCGAGCTGATTCAAGAGATCAGCTCGGACATGAGGGCTTTTTTGct  
cgagctggcgaattcc  
>CD\_NM\_005211.2:950  
CgCctGcgagtctGGtatGACCAGATCGTGTGCTCAGCCAGTTCAAGAGACTGGCTGAGCACACGATCTGGTTTTTGct  
cgagctggcgaattcc  
>CD\_NM\_005211.2:2838  
CgCctGcgagtctGGtatGATCACTTGGGCTGAATCCCTACTTCAAGAGAGTAGGGATTAGCCCAAGTGAGTTTTTGct  
cgagctggcgaattcc  
>CD\_NM\_005211.2:972

CgCctGcgagtctGGtatGAAGCGTTGATGTTAACTTTGATTTCAAGAGAATCAAAGTTAACATCAACGCTGTTTTTGct  
cgagctggcgaattcc  
>CD\_NM\_005211.2:2439  
CgCctGcgagtctGGtatGAAGCCAGGGTGTGGACACCTATTTCAAGAGAATAGGTGTCCACACCTGGCTGTTTTTGct  
cgagctggcgaattcc  
>CD\_NM\_005211.2:1892  
CgCctGcgagtctGGtatGCGCTGCTATTGTACAAGTATAATTCAAGAGATTATACTTGTACAATAGCAGCATTTTTTGct  
cgagctggcgaattcc  
>CD\_NM\_005211.2:2174  
CgCctGcgagtctGGtatGCGGCCCTCATGTCCGAGCTGAATTCAAGAGATTCAGCTCGGACATGAGGGCCTTTTTTGct  
cgagctggcgaattcc  
>CD\_NM\_005211.2:609  
CgCctGcgagtctGGtatGACCCTGGAACGTGCTAGCACAGTTCAAGAGACTGTGCTAGCACGTTCCAGGGCTTTTTGct  
cgagctggcgaattcc  
>CD\_NM\_005211.2:624  
CgCctGcgagtctGGtatGCGCACAGGAGGTGGTCGTGTTCTTCAAGAGAGAACACGACCACCTCCTGTGCTTTTTTGct  
cgagctggcgaattcc  
>CD\_NM\_005211.2:663  
CgCctGcgagtctGGtatGCCTGCCCTGTCTGCTCACAGACTTCAAGAGAGTCTGTGAGCAGACAGGGCAGTTTTTGct  
cgagctggcgaattcc  
>CD\_NM\_005211.2:2736  
CgCctGcgagtctGGtatGACGCCTGCCGTGAAGTGGATGTTCAAGAGACATCCACTTCACAGGCAGGCGTTTTTGct  
cgagctggcgaattcc  
>CD\_NM\_005211.2:970  
CgCctGcgagtctGGtatGCGCAGCGTTGATGTTAACTTTGTTCAAGAGACAAAGTTAACATCAACGCTGCTTTTTTGct  
cgagctggcgaattcc  
>CD\_NM\_005211.2:576  
CgCctGcgagtctGGtatGAGCCATCCACCTCTATGTCAAATTCAGAGATTTGACATAGAGGTGGATGGCGTTTTTGct  
cgagctggcgaattcc  
>CD\_NM\_005211.2:2502  
CgCctGcgagtctGGtatGATCTGAGCAAGACCTGGACAAGTTCAAGAGACTTGTCCAGGTCTTGCTCAGAGTTTTTGct  
cgagctggcgaattcc  
>CD\_NM\_005211.2:1884  
CgCctGcgagtctGGtatGACTGCTCCTGCTGCTATTGTACTTCAAGAGAGTACAATAGCAGCAGGAGCAGTTTTTGct  
cgagctggcgaattcc  
>CD\_NM\_005211.2:864  
CgCctGcgagtctGGtatGACGGCTGAAAGTGCAGAAAGTCTTCAAGAGAGACTTTCTGCACTTTCAGCCGGTTTTTGct  
cgagctggcgaattcc  
>CD\_NM\_005211.2:1928  
CgCctGcgagtctGGtatGCCAGGTCCGCTGGAAGATCATTTCAGAGAAATGATCTTCCAGCGGACCTGGTTTTTGct  
cgagctggcgaattcc  
>CD\_NM\_005211.2:2118  
CgCctGcgagtctGGtatGCGTCCCTGAAGGTGGCTGTGAAGTTCAAGAGACTTCACAGCCACCTTCAGGACATTTTTTGct  
cgagctggcgaattcc  
>CD\_NM\_005211.2:2883  
CgCctGcgagtctGGtatGATTCTATAAACTGGTGAAGGATTTCAAGAGAATCCTTCACCAGTTTATAGAACTTTTTGct  
cgagctggcgaattcc  
>CD\_NM\_005211.2:1148  
CgCctGcgagtctGGtatGCGCACTCCACCTCCATGTTCTTTTCAAGAGAAAGAACATGGAGGTGGAGTGTTTTTGct  
cgagctggcgaattcc  
>CD\_NM\_005211.2:369  
CgCctGcgagtctGGtatGCGTCCCTGAGCTGGTTCGTGAAGTTCAAGAGACTTCACGACCAGCTCAGGGACATTTTTTGct  
cgagctggcgaattcc  
>CD\_NM\_005211.2:1505

CgCtGcgagtctGGtatGACGTCATATGGACATTCATCAATTCAAGAGATTGATGAATGTCCATATGACGCTTTTTGct  
cgagctggcgaattcc  
>CD\_NM\_005211.2:1074  
CgCtGcgagtctGGtatGAACCTCAACCTCGATCAAGTATTCAAGAGATACTTGATCGAGGTTGAGGGTCTTTTTGct  
cgagctggcgaattcc  
>CD\_NM\_005211.2:2304  
CgCtGcgagtctGGtatGACTCAACTTCTGCGAAGGAAGTTCAAGAGACTTCCTTCGCAGAAAGTTGAGCTTTTTGct  
cgagctggcgaattcc  
>CD\_NM\_005211.2:1128  
CgCtGcgagtctGGtatGAGCCAGCAACGTGCAGGGCAAGTTCAAGAGACTTGCCCTGCACGTTGCTGGCCTTTTTGct  
cgagctggcgaattcc  
>CD\_NM\_005211.2:1329  
CgCtGcgagtctGGtatGACCTGAGCCCAAGCTTGCTAATTTCAAGAGAATTAGCAAGCTTGGGCTCAGGCTTTTTGct  
cgagctggcgaattcc  
>CD\_NM\_005211.2:2688  
CgCtGcgagtctGGtatGAGCTAGGGACATCATGAATGACTTCAAGAGAGTCATTCATGATGTCCCTAGCCTTTTTGct  
cgagctggcgaattcc  
>CD\_NM\_005211.2:1176  
CgCtGcgagtctGGtatGAGTAGAGAGTGCCACTTGAACTTCAAGAGAGTTCAAGTAGGCACTCTCTACCTTTTTGct  
cgagctggcgaattcc  
>CD\_NM\_006140:736  
CgCtGcgagtctGGtatGCCAGGATTAACGTCTCGCAATTTTCAAGAGAAATTGCGAGACGTTAATCCTGATTTTTGct  
cgagctggcgaattcc  
>CD\_NM\_006140:777  
CgCtGcgagtctGGtatGAAGCCGAGAAAATTGGCATCCAATTTCAAGAGATTGGATGCCAATTTCTCGGCTGTTTTGct  
cgagctggcgaattcc  
>CD\_NM\_006140:749  
CgCtGcgagtctGGtatGATCGCAATTACTTCTGGTTAATTTCAAGAGATTAACCAGAAAGTAATTGCGAGTTTTGct  
cgagctggcgaattcc  
>CD\_NM\_006140:1360  
CgCtGcgagtctGGtatGAAGGTCTTGACCGTGAAGGAAATTTCAAGAGATTTCTTCCACGGTCAAGACCTTTTTGct  
cgagctggcgaattcc  
>CD\_NM\_006140:667  
CgCtGcgagtctGGtatGCGGGAGATCCGGTGTCTTATTTTTCAAGAGAAATAAGGACACCGGATCTCCCTTTTTGct  
cgagctggcgaattcc  
>CD\_NM\_006140.3:352  
CgCtGcgagtctGGtatGACTTCAGCAAGTGTTCCTTAACCTTCAAGAGAGTTAAGAAACACTTGCTGAAGGTTTTGct  
cgagctggcgaattcc  
>CD\_NM\_006140.3:287  
CgCtGcgagtctGGtatGCAGTCTCAATGTGAGGTTTACTTCAAGAGAGTCAAACCTCACATTGAGACTATTTTTGct  
cgagctggcgaattcc  
>CD\_NM\_006140.3:1271  
CgCtGcgagtctGGtatGAAAAGACAACTGAATGATAACTTCAAGAGAGTTATCATTGAGTTTGTCTTTGTTTTGct  
cgagctggcgaattcc  
>CD\_NM\_006140.3:1306  
CgCtGcgagtctGGtatGCCGAGATCATCTGGGAGGAATTTTCAAGAGAAATTCCTCCAGATGATCTCGTTTTGct  
cgagctggcgaattcc  
>CD\_NM\_006140.3:547  
CgCtGcgagtctGGtatGATCAGAATTTCTCTGTTTCAATTTCAAGAGAATGAAACAGGAGAAATTTGAGTTTTGct  
cgagctggcgaattcc  
>CD\_NM\_006140.3:356  
CgCtGcgagtctGGtatGAAGCAAGTGTTCCTTAACCTGACTTCAAGAGAGTCAGTTAAGAAACACTTGCTGTTTTGct  
cgagctggcgaattcc  
>CD\_NM\_006140.3:1148

CgCtGcgagtctGGtatGACTCGGCTCTGTGTACATTTATTTCAAGAGAATAAATGTACACAGAGCCGAGGTTTTTGct  
cgagctggcgaattcc  
>CD\_NM\_006140.3:426  
CgCtGcgagtctGGtatGCGCACATTTCTGTAAATTTGTCTTCAAGAGAGACAAATTTACGAAATGTGCATTTTTTGct  
cgagctggcgaattcc  
>CD\_NM\_006140.3:1331  
CgCtGcgagtctGGtatGACCAGAGGAAGGGAAAGGCTACTTCAAGAGAGTAGCCTTTCCCTTCTCTGGGTTTTTGct  
cgagctggcgaattcc  
>CD\_NM\_006140.3:749  
CgCtGcgagtctGGtatGCCGCAATTACTTTCTGGTTAACTTCAAGAGAGTTAACCAGAAAGTAATTGCGATTTTTTGct  
cgagctggcgaattcc  
>CD\_NM\_006140.3:792  
CgCtGcgagtctGGtatGCTCCAATTCTTTGATTCACTTTTTCAAGAGAAAAGTGAATCAAAGAATTGGATTTTTTGct  
cgagctggcgaattcc  
>CD\_NM\_006140.3:672  
CgCtGcgagtctGGtatGCTCCGGTGTCTTATTACATACTTCAAGAGAGTATGTAATAAGGACACCGGATTTTTTGct  
cgagctggcgaattcc  
>CD\_NM\_006140.3:677  
CgCtGcgagtctGGtatGATGTCTTATTACATAACAAGACTTCAAGAGAGTCTTGTATGTAATAAGGACACTTTTTTGct  
cgagctggcgaattcc  
>CD\_NM\_006140.3:777  
CgCtGcgagtctGGtatGCGCCGAGAAATTGGCATCCAATTTCAAGAGAATTGGATGCCAATTTCTCGGCTTTTTTGct  
cgagctggcgaattcc  
>CD\_NM\_006140.3:1275  
CgCtGcgagtctGGtatGAACAACTGAATGATAACCATGTTCAAGAGACATGGTTATCATTCAAGTTTGTCTTTTTTGct  
cgagctggcgaattcc  
>CD\_NM\_006140.3:489  
CgCtGcgagtctGGtatGAAAAGAGGATTTCAACAGAACTTCAAGAGAGTTTCTGTTGAAATCCTCTTTGTTTTTGct  
cgagctggcgaattcc  
>CD\_NM\_006140.3:545  
CgCtGcgagtctGGtatGCGCTCAGAAATTTCTCTGTTTCTTCAAGAGAGAAACAGGAGAAATTTCTGAGCATTTTTTGct  
cgagctggcgaattcc  
>CD\_NM\_006140.3:1205  
CgCtGcgagtctGGtatGAGTCTCGGCTTCTCTTTAAATTTCAAGAGATTTAAAGAGGAAGCCGAGGACTTTTTGct  
cgagctggcgaattcc  
>CD\_NM\_006140.3:1256  
CgCtGcgagtctGGtatGACCAGTTCCACAGATCAAAGACTTCAAGAGAGTCTTTGATCTGTGGAAGTGGCTTTTTTGct  
cgagctggcgaattcc  
>CD\_NM\_006140.3:1084  
CgCtGcgagtctGGtatGCCGTCCGCATCTTGAATTGGAGTTCAAGAGACTCCAATTTCAAGATGCGGACGTTTTTGct  
cgagctggcgaattcc  
>CD\_NM\_006140.3:724  
CgCtGcgagtctGGtatGCGGATAACCTGTCAGGATTAAGTTCAAGAGAGTTAATCCTGACAGGTTATCCATTTTTTGct  
cgagctggcgaattcc  
>CD\_NM\_006140.3:200  
CgCtGcgagtctGGtatGAACAAGCCTTCTGCTCTGTGAGTTCAAGAGACTCACAGAGCAGAAGGCTTGTCTTTTTTGct  
cgagctggcgaattcc  
>CD\_NM\_006140.3:564  
CgCtGcgagtctGGtatGCTCATCTACAATGCGGATTTAATTTCAAGAGATTAATCCGCATTGTAGATGAATTTTTTGct  
cgagctggcgaattcc  
>CD\_NM\_006140.3:696  
CgCtGcgagtctGGtatGAACTCAGGAACCCATGTGGGATTTCAAGAGAATCCACATGGGTTCTTGAGTCTTTTTTGct  
cgagctggcgaattcc  
>CD\_NM\_006140.3:1079



CgCtGcgagtctGGtatGCGCAGACGTCCGCATCTTGAATTTCAAGAGAATTCAAGATGCGGACGTCTGCATTTTTGct  
cgagctggcgaattcc  
>CD\_NM\_006140.3:461  
CgCtGcgagtctGGtatGAACATTTGAGGTTACGTGAATTTCAAGAGAATTACGTGAACCTCAAATGTGTTTTGct  
cgagctggcgaattcc  
>CD\_NM\_006140.3:1104  
CgCtGcgagtctGGtatGCGCTCCTGGAGTGAAGCCATTGTTCAAGAGACAATGGCTTCACTCCAGGAGCTTTTTGct  
cgagctggcgaattcc  
>CD\_NM\_006140.3:949  
CgCtGcgagtctGGtatGCGGACGTCCACAGAAAGAATACTTCAAGAGAGTATTCTTTCTGTGGACGTCCATTTTTGct  
cgagctggcgaattcc  
>CD\_NM\_000222:2705  
CgCtGcgagtctGGtatGAACCTGCTGAAATGTATGACATTTCAAGAGAATGTCATACATTTCAAGAGGTGTTTTGct  
cgagctggcgaattcc  
>CD\_NM\_000222:322  
CgCtGcgagtctGGtatGAACGGCTTAAGCAATTCATTTTTCAAGAGAAAATGGAATTGCTTAAGCCGTGTTTTGct  
cgagctggcgaattcc  
>CD\_NM\_000222:1925  
CgCtGcgagtctGGtatGCAGCCCTCATGTCTGAACTCAATTTCAAGAGATTGAGTTCAGACATGAGGGCTTTTTGct  
cgagctggcgaattcc  
>CD\_NM\_000222:804  
CgCtGcgagtctGGtatGATGGCATCACGGTGACTTCAATTTCAAGAGAATTGAAGTCACCGTGATGCCAGTTTTGct  
cgagctggcgaattcc  
>CD\_NM\_000222:969  
CgCtGcgagtctGGtatGACCCATGATAAACACTACAGTATTCAAGAGATACTGTAGTGTATCATGGGGTTTTGct  
cgagctggcgaattcc  
>CD\_NM\_000222:2013  
CgCtGcgagtctGGtatGACCCACCCTGGTCATTACAGAATTTCAAGAGATTCTGTAATGACCAGGGTGGGCTTTTTGct  
cgagctggcgaattcc  
>CD\_NM\_000222.1:1362  
CgCtGcgagtctGGtatGAAGAGATGCTCTGCTTCTGTACTTCAAGAGAGTACAGAAGCAGAGCATCTCTGTTTTGct  
cgagctggcgaattcc  
>CD\_NM\_000222.1:1838  
CgCtGcgagtctGGtatGCACTGCTTATGGCTTAATTAAGTTCAAGAGACTTAATTAAGCCATAAGCAGTTTTGct  
cgagctggcgaattcc  
>CD\_NM\_000222.1:658  
CgCtGcgagtctGGtatGCTGTGTCTGTGTCCAAAGCAAGTTCAAGAGACTTGCTTTGGACACAGACACAATTTTTGct  
cgagctggcgaattcc  
>CD\_NM\_000222.1:2420  
CgCtGcgagtctGGtatGCACTCATGGTCGGATCACAAAGTTCAAGAGACTTGTGATCCGACCATGAGTATTTTTGct  
cgagctggcgaattcc  
>CD\_NM\_000222.1:877  
CgCtGcgagtctGGtatGAAGTGTTCATGTGTTATGCCAATTTCAAGAGATTGGCATAACACATGAACACTTTTTGct  
cgagctggcgaattcc  
>CD\_NM\_000222.1:2599  
CgCtGcgagtctGGtatGAGGAGCTGTCTCTTTAGGAAGTTCAAGAGACTTCCTAAAGAGAACAGCTCCTTTTGct  
cgagctggcgaattcc  
>CD\_NM\_000222.1:2918  
CgCtGcgagtctGGtatGATCCCAGCCTCTGCTTGTGCACTTCAAGAGAGTGCACAAGCAGAGGCTGGGAGTTTTGct  
cgagctggcgaattcc  
>CD\_NM\_000222.1:1937  
CgCtGcgagtctGGtatGCGAACTCAAAGTCTGAGTTACTTCAAGAGAGTAACCTCAGGACTTTGAGTTCATTTTTGct  
cgagctggcgaattcc  
>CD\_NM\_000222.1:1110

CgCtGcgagtctGGtatGCAGTCTGAGAATGAAAGTAATATTCAAGAGATATTACTTTTCATTCTCAGACTTTTTTTGct  
cgagctggcgaattcc  
>CD\_NM\_000222.1:1085  
CgCtGcgagtctGGtatGAACTGATAAATGGGAAGATTATTTCAAGAGAATAATCTTCCATTTATCAGTGTTTTTTGct  
cgagctggcgaattcc  
>CD\_NM\_000222.1:1586  
CgCtGcgagtctGGtatGAACTCCTTTGCTGATTGGTTTCTTCAAGAGAGAAACCAATCAGCAAAGGAGTGTTTTTTGct  
cgagctggcgaattcc  
>CD\_NM\_000222.1:2149  
CgCtGcgagtctGGtatGCGGAGTCTTCTGCAGCGATAGTTCAAGAGACTATCGCTGCAGGAAGACTCCTTTTTTTGct  
cgagctggcgaattcc  
>CD\_NM\_000222.1:2242  
CgCtGcgagtctGGtatGATGTGAGAATAGGCTCATACTTTCAAGAGAATGTATGAGCCTATTCTCACAGTTTTTTGct  
cgagctggcgaattcc  
>CD\_NM\_000222.1:2405  
CgCtGcgagtctGGtatGAAGAAATATCCTCCTTACTCATTTCAGAGAATGAGTAAGGAGGATATTTCTGTTTTTTGct  
cgagctggcgaattcc  
>CD\_NM\_000222.1:384  
CgCtGcgagtctGGtatGAGCTCCTTGTATGGGAAAGAAGTTCAAGAGACTTCTTTCCATAACAAGGAGCGTTTTTTGct  
cgagctggcgaattcc  
>CD\_NM\_000222.1:1416  
CgCtGcgagtctGGtatGAGGCCACCGTTTGAAAGCTAGTTCAAGAGACTAGCTTTCCAAACGGTGGCCTTTTTTGct  
cgagctggcgaattcc  
>CD\_NM\_000222.1:858  
CgCtGcgagtctGGtatGACGAGAGTTAATGATTCTGGAGTTCAAGAGACTCCAGAATCATTAACCTCGCTTTTTTTGct  
cgagctggcgaattcc  
>CD\_NM\_000222.1:1868  
CgCtGcgagtctGGtatGAGCCATGACTGTCGCTGTAAAGTTCAAGAGACTTTACAGCGACAGTCATGGCCTTTTTTTGct  
cgagctggcgaattcc  
>CD\_NM\_000222.1:981  
CgCtGcgagtctGGtatGCCTACAGTATTTGTAAACGATGTTCAAGAGACATCGTTTACAAATACTGTAGTTTTTTGct  
cgagctggcgaattcc  
>CD\_NM\_000222.1:2025  
CgCtGcgagtctGGtatGCTTACAGAATATTGTTGCTATGTTCAAGAGACATAGCAACAATATTCTGTAATTTTTTTGct  
cgagctggcgaattcc  
>CD\_NM\_000222.1:2644  
CgCtGcgagtctGGtatGCCGATTCTAAGTTCTACAAGATTTCAAGAGAATCTTGTAGAACTTAGAATCGATTTTTTTGct  
cgagctggcgaattcc  
>CD\_NM\_000222.1:1385  
CgCtGcgagtctGGtatGACCAGTGGATGTGCAGACACTATTCAAGAGATAGTGTCTGCACATCCACTGGCTTTTTTTGct  
cgagctggcgaattcc  
>CD\_NM\_000222.1:674  
CgCtGcgagtctGGtatGCGCAAGCTATCTTCTTAGGGAATTCAAGAGATTCCTAAGAAGATAGCTTGCTTTTTTTGct  
cgagctggcgaattcc  
>CD\_NM\_000222.1:386  
CgCtGcgagtctGGtatGATCCTTGTATGGGAAAGAAGACTTCAAGAGAGTCTTCTTTCCATAACAAGGAGTTTTTTGct  
cgagctggcgaattcc  
>CD\_NM\_000222.1:1924  
CgCtGcgagtctGGtatGCAGCCCTCATGTCTGAACTCAATTCAAGAGATTGAGTTCAGACATGAGGGCTTTTTTTGct  
cgagctggcgaattcc  
>CD\_NM\_000222.1:1661  
CgCtGcgagtctGGtatGCTTACAGAAACCCATGTATGAATTCAAGAGATTCATACATGGGTTTCTGTAAATTTTTTTGct  
cgagctggcgaattcc  
>CD\_NM\_000222.1:1628

CgCctGcgagtctGGtatGATGCATTATTGTGATGATTCTGTTCAAGAGACAGAATCATCACAATAATGCACTTTTTTGct  
cgagctggcgaattcc  
>CD\_NM\_002310:182  
CgCctGcgagtctGGtatGAACCATCCTGGATGGTGGACAATTCAAGAGATTGTCCACCATCCAGGATGGTCTTTTTTGct  
cgagctggcgaattcc  
>CD\_NM\_002310:229  
CgCctGcgagtctGGtatGCTCCAGTGGCTGTTATCAACATTTCAAGAGAATGTTGATAACAGCCACTGGAATTTTTTGct  
cgagctggcgaattcc  
>CD\_NM\_002310:1674  
CgCctGcgagtctGGtatGCCGGATTTCGTTGTTCTACTGAATTCAAGAGATTTCAGTAGAACCAACGAATCCGATTTTTTGct  
cgagctggcgaattcc  
>CD\_NM\_002310:1872  
CgCctGcgagtctGGtatGCTCGTGTTCATCAGATGAGGAATTCAAGAGATTCCTCATCTGATGAACACGATTTTTTGct  
cgagctggcgaattcc  
>CD\_NM\_002310:2193  
CgCctGcgagtctGGtatGAAGCACTGAAACTGTAATAGAATTCAAGAGATTCTATTACAGTTTCAGTGCTTTTTTGct  
cgagctggcgaattcc  
>CD\_NM\_002310:2318  
CgCctGcgagtctGGtatGCGGCTCCCATTTGTTGCACCAAATTCAAGAGATTTGGTGCAACAATGGGAGCCATTTTTTGct  
cgagctggcgaattcc  
>CD\_NM\_002310:1520  
CgCctGcgagtctGGtatGAAGGCAACTTTGCAAAGATTAATTCAAGAGATTAATCTTTGCAAAGTTGCCTTTTTTGct  
cgagctggcgaattcc  
>CD\_NM\_002310.3:3307  
CgCctGcgagtctGGtatGATGAGATTGTCCTCATTTGGAAGTTCAAGAGACTTCCAAATGAGACAATCTCACTTTTTGct  
cgagctggcgaattcc  
>CD\_NM\_002310.3:2193  
CgCctGcgagtctGGtatGCGCACTGAAACTGTAATAGAATTTCAAGAGAATTCATTACAGTTTCAGTGCTTTTTTGct  
cgagctggcgaattcc  
>CD\_NM\_002310.3:2621  
CgCctGcgagtctGGtatGAAGTATGTATGTGGTGACAAAGTTCAAGAGACTTTGTCACCACATACATACTTTTTTGct  
cgagctggcgaattcc  
>CD\_NM\_002310.3:372  
CgCctGcgagtctGGtatGAGCCGTGGTACTGATTATGAAGTTCAAGAGACTTCATAATCAGTACCACGGCCTTTTTTGct  
cgagctggcgaattcc  
>CD\_NM\_002310.3:459  
CgCctGcgagtctGGtatGATTTACATGGTGATTATGAAATTTCAAGAGATTTTCATAATCACCATGTGAAAGTTTTTGct  
cgagctggcgaattcc  
>CD\_NM\_002310.3:989  
CgCctGcgagtctGGtatGCGCACTGATTGGCCATACAACTTTCAAGAGAGTTTGTATGGCCAATCAGTGCTTTTTTGct  
cgagctggcgaattcc  
>CD\_NM\_002310.3:1872  
CgCctGcgagtctGGtatGCCGTGTTTCATCAGATGAGGAAATTCAAGAGATTCCTCATCTGATGAACACGATTTTTTGct  
cgagctggcgaattcc  
>CD\_NM\_002310.3:2543  
CgCctGcgagtctGGtatGCATTGCTGATCTTCAAGGTAAATTCAAGAGATTTACCTTGAAGATCAGCAATTTTTTGct  
cgagctggcgaattcc  
>CD\_NM\_002310.3:1463  
CgCctGcgagtctGGtatGCTCATTCAAAGTGAAGGATATTTTTCAAGAGAAATATCCTTCACTTTGAATGAATTTTTTGct  
cgagctggcgaattcc  
>CD\_NM\_002310.3:1911  
CgCctGcgagtctGGtatGCTCCCTGATCCTCAGCACAAAGTTCAAGAGACTTTGTGCTGAGGATCAGGGATTTTTTGct  
cgagctggcgaattcc  
>CD\_NM\_002310.3:2285

CgCtGcgagtctGGtatGCTTACGCTCCATGATTGGATATTTCAAGAGAATATCCAATCATGGAGCGTAATTTTTTgct  
cgagctggcgaattcc  
>CD\_NM\_002310.3:336  
CgCtGcgagtctGGtatGATGTGGAAGTCTTGGAAAGTTCAAGAGACTTTCCAAGAACAGTTCCACACTTTTTTgct  
cgagctggcgaattcc  
>CD\_NM\_002310.3:2122  
CgCtGcgagtctGGtatGCCGTCATTAAGTGGTGTAACTCTTCAAGAGAGAGTTACACCACTTAATGACGTTTTTTGct  
cgagctggcgaattcc  
>CD\_NM\_002310.3:1157  
CgCtGcgagtctGGtatGCCCTCAACAAGTGAATTGTGAGTTCAAGAGACTCACAATTCAGTTGTTGAGGATTTTTGct  
cgagctggcgaattcc  
>CD\_NM\_002310.3:1337  
CgCtGcgagtctGGtatGCTTATTTCAAATGCTTCAAATTTCAAGAGAATTTGGAAGCATTGAAATAATTTTTTgct  
cgagctggcgaattcc  
>CD\_NM\_002310.3:299  
CgCtGcgagtctGGtatGCCCTCATGATTTGAAGTGTGTATTCAAGAGATACACACTTCAAATCATGAGGATTTTTGct  
cgagctggcgaattcc  
>CD\_NM\_002310.3:1935  
CgCtGcgagtctGGtatGAAGATACGACTTGATAAGAATGTTCAAGAGACATTCATTATCAAGTCGTATCTTTTTTgct  
cgagctggcgaattcc  
>CD\_NM\_002310.3:229  
CgCtGcgagtctGGtatGCCAGTGGCTGTTATCAACATTTTTCAAGAGAAATGTTGATAACAGCCACTGGATTTTTGct  
cgagctggcgaattcc  
>CD\_NM\_002310.3:515  
CgCtGcgagtctGGtatGCACAAGTAAATTCACACTAAATTTCAAGAGAATTTAGTGTGAATTTACTTGTATTTTTGct  
cgagctggcgaattcc  
>CD\_NM\_002310.3:334  
CgCtGcgagtctGGtatGCAGTGTGGAAGTCTTGGAAATTTCAAGAGATTTCCAAGAACAGTTCCACACTTTTTTgct  
cgagctggcgaattcc  
>CD\_NM\_002310.3:1690  
CgCtGcgagtctGGtatGATGAAACTTTCTGGAATGGAGTTCAAGAGACTCCATTTCCAGAAAGTTTCAGTTTTTgct  
cgagctggcgaattcc  
>CD\_NM\_002310.3:1192  
CgCtGcgagtctGGtatGCAGAAATTATATGTAGTTGGAATTTCAAGAGATTTCCAACTACATATAATTTCTTTTTTgct  
cgagctggcgaattcc  
>CD\_NM\_002310.3:2538  
CgCtGcgagtctGGtatGATGAGAATTGCTGATCTTCAAGTTCAAGAGACTTGAAGATCAGCAATTCAGTTTTTgct  
cgagctggcgaattcc  
>CD\_NM\_002310.3:1674  
CgCtGcgagtctGGtatGAGGATTCGTTGTTCTACTGAAATTTCAAGAGATTTTCAGTAGAACAACGAATCCGTTTTTgct  
cgagctggcgaattcc  
>CD\_NM\_002310.3:610  
CgCtGcgagtctGGtatGCATACCTAAAGTGGAAACGACAGTTCAAGAGACTGTCGTTCCACTTTAGGTATATTTTTGct  
cgagctggcgaattcc  
>CD\_NM\_002310.3:1170  
CgCtGcgagtctGGtatGCATTGTGAGACACATGATTTAATTTCAAGAGATTAATCATGTGTCTCACAATTTTTTgct  
cgagctggcgaattcc  
>CD\_NM\_000416:135  
CgCtGcgagtctGGtatGAACCAACTAATGTTACAATTGATTCAAGAGATCAATTGTAACATTAGTTGGTGTTTTTGct  
cgagctggcgaattcc  
>CD\_NM\_000416:458  
CgCtGcgagtctGGtatGCAGCAAATCATGATTGACATATTTCAAGAGAATATGTCAATCATGATTTGCTTTTTTgct  
cgagctggcgaattcc  
>CD\_NM\_000416:579

CgCctGcgagtctGGtatGCCGGAAGTGAGATCCAGTATAATTCAAGAGATTATACTGGATCTCACTTCCGTTTTTTGct  
cgagctggcgaattcc  
>CD\_NM\_000416:1143  
CgCctGcgagtctGGtatGAGGGCAGCCATCTGACTCCAATTTCAAGAGAATTGGAGTCAGATGGCTGCCGTTTTTTGct  
cgagctggcgaattcc  
>CD\_NM\_000416:1309  
CgCctGcgagtctGGtatGCAGCTCCTTATCTGACTCAGAATTTCAAGAGATTCTGAGTCAGATAAGGAGCTATTTTTTGct  
cgagctggcgaattcc  
>CD\_NM\_000416:1396  
CgCctGcgagtctGGtatGACCCACCTCCTTTGGTTATGATTTCAAGAGAATCATAACCAAAGGAGGTGGGGTTTTTTGct  
cgagctggcgaattcc  
>CD\_NM\_000416:1365  
CgCctGcgagtctGGtatGCAGGACAAGAGCTCATAACCGTTTTCAAGAGAACGGTTATGAGCTCTTGTCCTTTTTTTGct  
cgagctggcgaattcc  
>CD\_NM\_000416.1:530  
CgCctGcgagtctGGtatGACGAACTACCTGTTACATTAGTTCAAGAGACTAATGTAACAGGTAGTTTCGGTTTTTTGct  
cgagctggcgaattcc  
>CD\_NM\_000416.1:330  
CgCctGcgagtctGGtatGCTCTCTTTGGGTCAGAGTTAAATTTCAAGAGATTTAACTCTGACCCAAAGAGAATTTTTGct  
cgagctggcgaattcc  
>CD\_NM\_000416.1:1309  
CgCctGcgagtctGGtatGCGCTCCTTATCTGACTCAGAATTTCAAGAGAATTCTGAGTCAGATAAGGAGCTTTTTTTGct  
cgagctggcgaattcc  
>CD\_NM\_000416.1:1399  
CgCctGcgagtctGGtatGCCCTCCTTTGGTTATGATAAACTTTCAAGAGAGTTTATCATAACCAAAGGAGGTTTTTTTGct  
cgagctggcgaattcc  
>CD\_NM\_000416.1:896  
CgCctGcgagtctGGtatGCGTCCTTGATCTCTGTGGTAAGTTCAAGAGACTTACCACAGAGATCAAGGACTTTTTTTGct  
cgagctggcgaattcc  
>CD\_NM\_000416.1:558  
CgCctGcgagtctGGtatGAAATGTGTATGTGAGAATGAACTTTCAAGAGAGTTCATTCTCACATACACATTGTTTTTTGct  
cgagctggcgaattcc  
>CD\_NM\_000416.1:135  
CgCctGcgagtctGGtatGCCCAACTAATGTTACAATTGAATTTCAAGAGATTC AATTGTAACATTAGTTGGTTTTTTGct  
cgagctggcgaattcc  
>CD\_NM\_000416.1:1462  
CgCctGcgagtctGGtatGAAGTCCTTGATTGGTTATAGACTTTCAAGAGAGTCTATAACCAATCAAGGACTCTTTTTTTGct  
cgagctggcgaattcc  
>CD\_NM\_000416.1:1012  
CgCctGcgagtctGGtatGAAGCCGTTGTCTCCAGCAACAGTTCAAGAGACTGTTGCTGGAGACAACGGCTCTTTTTTTGct  
cgagctggcgaattcc  
>CD\_NM\_000416.1:787  
CgCctGcgagtctGGtatGCTTCCAGTTGTTGCTGCTTTACTTTCAAGAGAGTAAAGCAGCAACAACTGGAATTTTTTTGct  
cgagctggcgaattcc  
>CD\_NM\_000416.1:1396  
CgCctGcgagtctGGtatGACCACCTCCTTTGGTTATGATATTCAAGAGATATCATAACCAAAGGAGGTGGGTTTTTTGct  
cgagctggcgaattcc  
>CD\_NM\_000416.1:910  
CgCctGcgagtctGGtatGATGGTAAGAAGTGCTACTTTAGTTCAAGAGACTAAAGTAGCACTTCTTACCACTTTTTTGct  
cgagctggcgaattcc  
>CD\_NM\_000416.1:1235  
CgCctGcgagtctGGtatGCCTCCAGAAATGTTCTGAGAGTTCAAGAGACTCTCAGAACAATTTCTGGAGTTTTTTGct  
cgagctggcgaattcc  
>CD\_NM\_000416.1:1458

CgCctGcgagtctGGtatGCAAAGAGTCCTTGATTGGTTATTTCAAGAGAATAACCAATCAAGGACTCTTTATTTTTGct  
cgagctggcgaattcc  
>CD\_NM\_000416.1:1402  
CgCctGcgagtctGGtatGCCCTTGGTTATGATAAACCACTTCAAGAGAGTGGTTTATCATAACCAAAGGATTTTTGct  
cgagctggcgaattcc  
>CD\_NM\_000416.1:1169  
CgCctGcgagtctGGtatGAAGAGAGTTCTTCACCTTTAAGTTCAAGAGACTTAAAGGTGAAGAACTCTCTTTTTGct  
cgagctggcgaattcc  
>CD\_NM\_000416.1:232  
CgCctGcgagtctGGtatGCAGAACTATGGTGTTAAGAATTTTCAAGAGAAATCTTAACACCATAGTTCTTTTTTGGct  
cgagctggcgaattcc  
>CD\_NM\_000416.1:1302  
CgCctGcgagtctGGtatGCTCACATAGCTCCTTATCTGACTTCAAGAGAGTCAGATAAGGAGCTATGTGATTTTTGct  
cgagctggcgaattcc  
>CD\_NM\_000416.1:156  
CgCctGcgagtctGGtatGCTCCTATAACATGAACCCTATCTTCAAGAGAGATAGGGTTCATGTTATAGGATTTTTGct  
cgagctggcgaattcc  
>CD\_NM\_000416.1:1287  
CgCctGcgagtctGGtatGCTCCAGCTGTCTGGAATCACATTTCAAGAGAATGTGATTCCAGACAGCTGGAATTTTTGct  
cgagctggcgaattcc  
>CD\_NM\_000416.1:1217  
CgCctGcgagtctGGtatGCCGCTTTAAACTCGTATCACTCTTCAAGAGAGAGTGATACGAGTTTAAAGCGATTTTTGct  
cgagctggcgaattcc  
>CD\_NM\_000416.1:819  
CgCctGcgagtctGGtatGCGTGCTTAGCCTGGTATTCATCTTCAAGAGAGATGAATACCAGGCTAAGCACTTTTTGct  
cgagctggcgaattcc  
>CD\_NM\_000416.1:579  
CgCctGcgagtctGGtatGAGGAAGTGAGATCCAGTATAAATTTCAAGAGATTTATACTGGATCTCACTCCGTTTTGct  
cgagctggcgaattcc  
>CD\_NM\_000416.1:1206  
CgCctGcgagtctGGtatGCCCTGGCAGCATCGCTTTAAACTTCAAGAGAGTTTAAAGCGATGCTGCCAGGTTTTGct  
cgagctggcgaattcc  
>CD\_NM\_000416.1:1370  
CgCctGcgagtctGGtatGCAGAGCTCATAACCGTAATAAATTTCAAGAGATTTATTACGGTTATGAGCTTTTTTGGct  
cgagctggcgaattcc  
>CD\_NM\_000416.1:1428  
CgCctGcgagtctGGtatGACTAGTGGATCTACTTGTGGATTTCAAGAGAATCCACAAGTAGATCCACTAGCTTTTTGct  
cgagctggcgaattcc  
>CD\_NM\_001065:539  
CgCctGcgagtctGGtatGAGGCTCCTTCACCGCTTCAGAATTTCAAGAGATTCTGAAGCGGTGAAGGAGCCGTTTTGct  
cgagctggcgaattcc  
>CD\_NM\_001065:584  
CgCctGcgagtctGGtatGATGCTCCAAATGCCGAAAGGAATTTCAAGAGATTCCTTTCGGCATTGGAGCAGTTTTGct  
cgagctggcgaattcc  
>CD\_NM\_001065:782  
CgCctGcgagtctGGtatGATGCCATGCAGGTTTCTTTCTATTCAAGAGATAGAAAGAAACCTGCATGGCAGTTTTGct  
cgagctggcgaattcc  
>CD\_NM\_001065:787  
CgCctGcgagtctGGtatGCTGCAGGTTCTTTCTAAGAGATTCAAGAGATCTTTAGAAAGAAACCTGCATTTTTGct  
cgagctggcgaattcc  
>CD\_NM\_001065:810  
CgCctGcgagtctGGtatGCACGAGTGTGTCTCCTGTAGTATTCAAGAGATACTACAGGAGACACACTCGTTTTTGGct  
cgagctggcgaattcc  
>CD\_NM\_001065:960

CgCctGcgagtctGGtatGATCCTCTTCATTGGTTTAATGTTTCAAGAGAACATTAACCAATGAAGAGGAGTTTTTGct  
cgagctggcgaattcc  
>CD\_NM\_001065.2:810  
CgCctGcgagtctGGtatGCCGAGTGTGTCTCCTGTAGTAATTC AAGAGATTACTACAGGAGACACACTCGTTTTTTGct  
cgagctggcgaattcc  
>CD\_NM\_001065.2:1181  
CgCctGcgagtctGGtatGACCGGTGACTGTCCCACTTTGTTCAAGAGACAAAGTTGGGACAGTCACCGGGTTTTTGct  
cgagctggcgaattcc  
>CD\_NM\_001065.2:648  
CgCctGcgagtctGGtatGACGTGTGTGGCTGCAGGAAGAATTC AAGAGATTCTTCCTGCAGCCACACACGGTTTTTTGct  
cgagctggcgaattcc  
>CD\_NM\_001065.2:539  
CgCctGcgagtctGGtatGAGCTCCTTCACCGCTTCAGAAATTC AAGAGATTCTGAAGCGGTGAAGGAGCCTTTTTTGct  
cgagctggcgaattcc  
>CD\_NM\_001065.2:787  
CgCctGcgagtctGGtatGCGCAGGTTTCTTTCTAAGAGAATTC AAGAGATTCTTTAGAAAGAAACCTGCATTTTTTGct  
cgagctggcgaattcc  
>CD\_NM\_001065.2:955  
CgCctGcgagtctGGtatGCTCCCTCCTCTTCATTGGTTTATTCAAGAGATAACCAATGAAGAGGAGGGATTTTTTGct  
cgagctggcgaattcc  
>CD\_NM\_001065.2:960  
CgCctGcgagtctGGtatGCCCTCTTCATTGGTTTAATGTATTCAAGAGATACATTAACCAATGAAGAGGATTTTTTGct  
cgagctggcgaattcc  
>CD\_NM\_001065.2:783  
CgCctGcgagtctGGtatGACCATGCAGGTTTCTTTCTAAGTTCAAGAGACTTAGAAAGAAACCTGCATGGCTTTTTTGct  
cgagctggcgaattcc  
>CD\_NM\_001065.2:584  
CgCctGcgagtctGGtatGCGCTCCAAATGCCGAAAGGAAATTC AAGAGATTCTTTTCGGCATTGGAGCATTTTTTGct  
cgagctggcgaattcc  
>CD\_NM\_001065.2:990  
CgCctGcgagtctGGtatGCACGGTGGAAGTCCAAGCTCTATTCAAGAGATAGAGCTTGGACTTCCACCGTTTTTTTGct  
cgagctggcgaattcc  
>CD\_NM\_001065.2:642  
CgCctGcgagtctGGtatGAGGACACCGTGTGTGGCTGCAGTTCAAGAGACTGCAGCCACACACGGTGTCCTTTTTTGct  
cgagctggcgaattcc  
>CD\_NM\_001065.2:646  
CgCctGcgagtctGGtatGAACCGTGTGTGGCTGCAGGAAGTTCAAGAGACTTCCTGCAGCCACACACGGTGTTTTTTGct  
cgagctggcgaattcc  
>CD\_NM\_001065.2:788  
CgCctGcgagtctGGtatGACAGGTTTCTTTCTAAGAGAAATTC AAGAGATTCTTTAGAAAGAAACCTGCTTTTTTGct  
cgagctggcgaattcc  
>CD\_NM\_001065.2:573  
CgCctGcgagtctGGtatGCCTGCCTCAGCTGCTCCAAATGTTCAAGAGACATTTGGAGCAGCTGAGGCAGTTTTTTTGct  
cgagctggcgaattcc  
>CD\_NM\_001065.2:741  
CgCctGcgagtctGGtatGCGCACCTCTCTGCCAGGAGAATTC AAGAGATTCTCTGGCAGGAGAGGTGCATTTTTTGct  
cgagctggcgaattcc  
>CD\_NM\_001065.2:570  
CgCctGcgagtctGGtatGAACACTGCCCTCAGCTGCTCCAATTC AAGAGATTGGAGCAGCTGAGGCAGTGTCTTTTTTGct  
cgagctggcgaattcc  
>CD\_NM\_001065.2:1011  
CgCctGcgagtctGGtatGCCTCCATTGTTTGTGGGAAATCTTCAAGAGAGATTTCCACAAACAATGGAGTTTTTTTGct  
cgagctggcgaattcc  
>CD\_NM\_001065.2:612

CgCctGcgagtctGGtatGCGGTGGAGATCTCTTCTTGCACTTCAAGAGAGTGCAAGAAGAGATCTCCACCTTTTTTGct  
cgagctggcgaattcc  
>CD\_NM\_001065.2:1625  
CgCctGcgagtctGGtatGACCGCGCCCAGTCTTCTCAGATTTCAAGAGAATCTGAGAAGACTGGGCGGGTTTTTGct  
cgagctggcgaattcc  
>CD\_NM\_001065.2:724  
CgCctGcgagtctGGtatGATGCCTCAATGGGACCGTGCCTTCAAGAGAGTGCACGGTCCCATTGAGGCAGTTTTTGct  
cgagctggcgaattcc  
>CD\_NM\_001065.2:472  
CgCctGcgagtctGGtatGCGGAACCTACTTGTACAATGACTTCAAGAGAGTCATTGTACAAGTAGGTTCCTTTTTGct  
cgagctggcgaattcc  
>CD\_NM\_001065.2:1158  
CgCctGcgagtctGGtatGCCACCTCCAGCTCCACCTATACTTCAAGAGAGTATAGGTGGAGCTGGAGGTGATTTTTGct  
cgagctggcgaattcc  
>CD\_NM\_001065.2:1140  
CgCctGcgagtctGGtatGACGTGCCAGTTCACCTTCACTTCAAGAGAGTGAAGGTGGAAGTGGGCACGGTTTTTGct  
cgagctggcgaattcc  
>CD\_NM\_001065.2:298  
CgCctGcgagtctGGtatGACCTGACCTGCTGCCACTGTTCAAGAGACAGTGGCAGCAGCAGGTCAGGTTTTTGct  
cgagctggcgaattcc  
>CD\_NM\_001065.2:674  
CgCctGcgagtctGGtatGCACCGGCATTATTGGAGTGAAATTTCAAGAGATTTCACTCCAATAATGCCGGTATTTTTGct  
cgagctggcgaattcc  
>CD\_NM\_001065.2:1321  
CgCctGcgagtctGGtatGACCACAGAGCCTAGACACTGATTTCAAGAGAATCAGTGTCTAGGCTCTGTGGCTTTTTTGct  
cgagctggcgaattcc  
>CD\_NM\_001065.2:967  
CgCctGcgagtctGGtatGAATTGGTTTAAATGTATCGCTACTTCAAGAGAGTAGCGATACATTAACCAATGTTTTTGct  
cgagctggcgaattcc  
>CD\_NM\_001066:200  
CgCctGcgagtctGGtatGAAGCACATGCCGGCTCAGAGAATTTCAAGAGATTTCTCTGAGCCGGCATGTGCTTTTTTGct  
cgagctggcgaattcc  
>CD\_NM\_001066:235  
CgCctGcgagtctGGtatGAAGCTCAGATGTGCTGCAGCAATTTCAAGAGATTGCTGCAGCACATCTGAGCTGTTTTTGct  
cgagctggcgaattcc  
>CD\_NM\_001066:958  
CgCctGcgagtctGGtatGCGCCCTTGTGCCTGCAGAGAGATTTCAAGAGATTTCTCTGCAGGCACAAGGGCTTTTTTGct  
cgagctggcgaattcc  
>CD\_NM\_001066.2:391  
CgCctGcgagtctGGtatGATCTGACCAGGTGGAACTCAATTTCAAGAGATTGAGTTTCCACCTGGTCAGAGTTTTTGct  
cgagctggcgaattcc  
>CD\_NM\_001066.2:738  
CgCctGcgagtctGGtatGACCAGCCAGTGTCCACACGATCTTCAAGAGAGATCGTGTGGACTGGCTGGGTTTTTGct  
cgagctggcgaattcc  
>CD\_NM\_001066.2:237  
CgCctGcgagtctGGtatGATCAGATGTGCTGCAGCAAATGTTCAAGAGACATTTGCTGCAGCACATCTGAGTTTTTGct  
cgagctggcgaattcc  
>CD\_NM\_001066.2:958  
CgCctGcgagtctGGtatGACCCTTGTGCCTGCAGAGAGAATTTCAAGAGATTTCTCTGCAGGCACAAGGGCTTTTTTGct  
cgagctggcgaattcc  
>CD\_NM\_001066.2:302  
CgCctGcgagtctGGtatGAACACCGTGTGTGACTCCTGTGTTCAAGAGACACAGGAGTCACACACGGTGTCTTTTTTGct  
cgagctggcgaattcc  
>CD\_NM\_001066.2:534



CgCctGcgagtctGGtatGCGGCCAGACCAGGAACTGAAACTTCAAGAGAGTTTCAGTTCCTGGTCTGGCCATTTTTGct  
cgagctggcgaattcc  
>CD\_NM\_001066.2:930  
CgCctGcgagtctGGtatGATGTCATCATGACCCAGGTGAATTC AAGAGATTCACCTGGGTCATGATGACACTTTTTGct  
cgagctggcgaattcc  
>CD\_NM\_001066.2:906  
CgCctGcgagtctGGtatGCACTAATAATAGGAGTGGTGAATTC AAGAGATTCACCACTCCTATTATTAGTATTTTTGct  
cgagctggcgaattcc  
>CD\_NM\_001066.2:539  
CgCctGcgagtctGGtatGCGACCAGGAACTGAAACATCAGTTC AAGAGACTGATGTTTCAGTTCCTGGTCTTTTTGct  
cgagctggcgaattcc  
>CD\_NM\_001066.2:918  
CgCctGcgagtctGGtatGAAGTGGTGAAGTGTGTCATCATTTT CAAGAGAATGATGACACAGTTCACCACTCTTTTTGct  
cgagctggcgaattcc  
>CD\_NM\_001066.2:202  
CgCctGcgagtctGGtatGAACATGCCGGCTCAGAGAATACTTCA AGAGAGTATTCTCTGAGCCGGCATGTGTTTTGct  
cgagctggcgaattcc  
>CD\_NM\_001066.2:1089  
CgCctGcgagtctGGtatGAGGCCAGTGCGTTGGACAGAAGTTCA AGAGACTTCTGTCCAACGCACTGGCCGTTTTGct  
cgagctggcgaattcc  
>CD\_NM\_001066.2:895  
CgCctGcgagtctGGtatGCGCCTTGGGCTACTAATAATATTCA AGAGATATTATTAGTAGACCCAAGGCTTTTTGct  
cgagctggcgaattcc  
>CD\_NM\_001066.2:890  
CgCctGcgagtctGGtatGATGACAGCCTTGGGTCTACTAATTCA AGAGATTAGTAGACCCAAGGCTGTCACTTTTGct  
cgagctggcgaattcc  
>CD\_NM\_001066.2:675  
CgCctGcgagtctGGtatGCGGATGCAGTCTGCACGTCCACTTCA AGAGAGTGGACGTGCAGACTGCATCCATTTTTGct  
cgagctggcgaattcc  
>CD\_NM\_001066.2:331  
CgCctGcgagtctGGtatGAACATAACCCAGCTCTGGAACTTCA AGAGAGTTCAGAGCTGGGTGTATGTGTTTTGct  
cgagctggcgaattcc  
>CD\_NM\_001066.2:1268  
CgCctGcgagtctGGtatGCGCTCACAGTGCTCCTCCCAAGTTCA AGAGACTTGGGAGGAGCACTGTGAGCTTTTTGct  
cgagctggcgaattcc  
>CD\_NM\_001066.2:880  
CgCctGcgagtctGGtatGAATTGTGGGTGTGACAGCCTTGTTCA AGAGACAAGGCTGTCACACCCACAATCTTTTTGct  
cgagctggcgaattcc  
>CD\_NM\_001066.2:1272  
CgCctGcgagtctGGtatGAACAGTGCTCCTCCCAAGCCAGTTCA AGAGACTGGCTTGGGAGGAGCACTGTGTTTTGct  
cgagctggcgaattcc  
>CD\_NM\_001066.2:558  
CgCctGcgagtctGGtatGAAGACGTGGTGTGCAAGCCCTGTTCA AGAGACAGGGCTTGCACACCACGTCTGTTTTGct  
cgagctggcgaattcc  
>CD\_NM\_001066.2:747  
CgCctGcgagtctGGtatGCGTCCACACGATCCCAACACACTTCA AGAGAGTGTGTTGGGATCGTGTGGACATTTTTGct  
cgagctggcgaattcc  
>CD\_NM\_001066.2:412  
CgCctGcgagtctGGtatGCGCCTGCACTCGGGAACAGAACTTCA AGAGAGTTCGTTCCCGAGTGCAGGCTTTTTGct  
cgagctggcgaattcc  
>CD\_NM\_001066.2:200  
CgCctGcgagtctGGtatGCGCACATGCCGGCTCAGAGAATTTCA AGAGAATTCTCTGAGCCGGCATGTGCTTTTTGct  
cgagctggcgaattcc  
>CD\_NM\_001066.2:206

CgCctGcgagtctGGtatGCGCCGGCTCAGAGAATACTATGTTCAAGAGACATAGTATTCTCTGAGCCGGCATT TTTTGct  
cgagctggcgaattcc  
>CD\_NM\_001066.2:300  
CgCctGcgagtctGGtatGAGGACACCGTGTGTGACTCCTGTTCAAGAGACAGGAGTCACACACGGTGTCCGTT TTTTGct  
cgagctggcgaattcc  
>CD\_NM\_001066.2:457  
CgCctGcgagtctGGtatGATGGTACTGCGCGCTGAGCAAGTTCAAGAGACTTGCTCAGCGCGCAGTACCAGTT TTTTGct  
cgagctggcgaattcc  
>CD\_NM\_001066.2:986  
CgCctGcgagtctGGtatGATGCCTCACTTGCCCTGCCGATATTCAAGAGATATCGGCAGGCAAGTGAGGCAC TTTTTGct  
cgagctggcgaattcc  
>CD\_NM\_001066.2:802  
CgCctGcgagtctGGtatGAACCTCCTTCTGCTCCCAATGTTCAAGAGACATTGGGAGCAGGAAGGAGGTG TTTTTGct  
cgagctggcgaattcc  
>CD\_NM\_001066.2:195  
CgCctGcgagtctGGtatGACGGGAGCACATGCCGGCTCAGTTCAAGAGACTGAGCCGGCATGTGCTCCCG TTTTTGct  
cgagctggcgaattcc  
>CD\_NM\_001066.2:553  
CgCctGcgagtctGGtatGCACATCAGACGTGGTGTGCAAGTTCAAGAGACTTGACACCACGTCTGATG TTTTTTgct  
cgagctggcgaattcc  
>CD\_NM\_000877:806  
CgCctGcgagtctGGtatGCCCCAGATACAATTGATCTGTATTCAAGAGATACAGATCAATTGTATCTGGG ATTTTTGct  
cgagctggcgaattcc  
>CD\_NM\_000877:953  
CgCctGcgagtctGGtatGCCCTCATCACAGTGCTTAATATTCAAGAGATATTAAGCACTGTGATGAGGG TTTTTTgct  
cgagctggcgaattcc  
>CD\_NM\_000877:1044  
CgCctGcgagtctGGtatGCTGCAGCATATATCCAGTTAATTTCAAGAGAATTAAGTGGATATATGCTGC ATTTTTTgct  
cgagctggcgaattcc  
>CD\_NM\_000877:1238  
CgCctGcgagtctGGtatGAACGCATATATACTGTATCCAATTTCAAGAGATTGGATACAGTATATATGCG TCTTTTgct  
cgagctggcgaattcc  
>CD\_NM\_000877:1273  
CgCctGcgagtctGGtatGCGGGTCTACCTCTGACTGTGATTTCAAGAGAATCACAGTCAGAGGTAGACC TTTTTTgct  
cgagctggcgaattcc  
>CD\_NM\_000877:1338  
CgCctGcgagtctGGtatGATGGATATAAGCTGTTTCAATTTATTCAAGAGATAAATGAACAGCTTATAT CCAC TTTTTGct  
cgagctggcgaattcc  
>CD\_NM\_000877.2:1338  
CgCctGcgagtctGGtatGCGGATATAAGCTGTTTCAATTTATTCAAGAGAATAAATGAACAGCTTATAT CCAT TTTTTGct  
cgagctggcgaattcc  
>CD\_NM\_000877.2:1161  
CgCctGcgagtctGGtatGAATTGACATTGTGCTTTGGTACTTCAAGAGAGTACCAAAGCACAAATGTCA ATCTTTTgct  
cgagctggcgaattcc  
>CD\_NM\_000877.2:428  
CgCctGcgagtctGGtatGCTGAGCCTAACTTATGTTATAAATTTCAAGAGATTATAACATAAGTTAGGC TCAT TTTTTGct  
cgagctggcgaattcc  
>CD\_NM\_000877.2:1386  
CgCctGcgagtctGGtatGAATTGTTGAGGTCATTAATGAATTTCAAGAGATTCAATTAATGACCTCAACA ATG TTTTTGct  
cgagctggcgaattcc  
>CD\_NM\_000877.2:812  
CgCctGcgagtctGGtatGCACAATTGATCTGTAATGTCACTTCAAGAGAGTGACATTACAGATCAATTGT AT TTTTTGct  
cgagctggcgaattcc  
>CD\_NM\_000877.2:1474

CgCctGcgagtctGGtatGAGTGGTTCATCTGAAGAGCAAATTC AAGAGATTTGCTCTTCAGATGAACCACCTTTTTTGct  
cgagctggcgaattcc  
>CD\_NM\_000877.2:384  
CgCctGcgagtctGGtatGCTCTTACTGCCTCAGAATTAATTC AAGAGATTTAATTCTGAGGCAGTAAGATTTTTTGct  
cgagctggcgaattcc  
>CD\_NM\_000877.2:871  
CgCctGcgagtctGGtatGAGGTCAGTAATTGATGAAGATGTTCAAGAGACATCTTCATCAATTACTGACCCTTTTTTGct  
cgagctggcgaattcc  
>CD\_NM\_000877.2:1239  
CgCctGcgagtctGGtatGAGCATATATACTGTATCCAAAGTTCAAGAGACTTTGGATACAGTATATATGCGTTTTTGct  
cgagctggcgaattcc  
>CD\_NM\_000877.2:1727  
CgCctGcgagtctGGtatGCCAGTTACTGTCACCAGCCACTTCAAGAGAGTGGCTGGTGACAGTAACTGGTTTTTGct  
cgagctggcgaattcc  
>CD\_NM\_000877.2:94  
CgCctGcgagtctGGtatGATCAGACTTATTTGTTTCATAGTTCAAGAGACTATGAAACAAATAAGTCTGAGTTTTTGct  
cgagctggcgaattcc  
>CD\_NM\_000877.2:1584  
CgCctGcgagtctGGtatGCTCGATTAAATTCATTAAGCAGTTCAAGAGACTGCTTAATGAATTTAATCGATTTTTTGct  
cgagctggcgaattcc  
>CD\_NM\_000877.2:806  
CgCctGcgagtctGGtatGACCAGATACAATTGATCTGTAATTC AAGAGATTACAGATCAATTGTATCTGGTTTTTGct  
cgagctggcgaattcc  
>CD\_NM\_000877.2:236  
CgCctGcgagtctGGtatGCAGGCACTATAACTTGGTATAATTC AAGAGATTATACCAAGTTATAGTGCCTTTTTGct  
cgagctggcgaattcc  
>CD\_NM\_000877.2:90  
CgCctGcgagtctGGtatGATTACTCAGACTTATTTGTTTCTTCAAGAGAGAAACAAATAAGTCTGAGTAACTTTTTTGct  
cgagctggcgaattcc  
>CD\_NM\_000877.2:1645  
CgCctGcgagtctGGtatGAGACCACAGTCTGCAAAGACAATTC AAGAGATTGTCTTTGCAGACTGTGGTCCTTTTTTGct  
cgagctggcgaattcc  
>CD\_NM\_000877.2:1110  
CgCctGcgagtctGGtatGAACGTTGACAGTCATAATTGTGTTCAAGAGACACAATTATGACTGTCAACGTGTTTTTGct  
cgagctggcgaattcc  
>CD\_NM\_000877.2:954  
CgCctGcgagtctGGtatGACTCATCACAGTGCTTAATATATTC AAGAGATATATTAAGCACTGTGATGAGGTTTTTGct  
cgagctggcgaattcc  
>CD\_NM\_000877.2:238  
CgCctGcgagtctGGtatGAGCACTATAACTTGGTATAAAGTTCAAGAGACTTTATAACCAAGTTATAGTGCCTTTTTGct  
cgagctggcgaattcc  
>CD\_NM\_000877.2:771  
CgCctGcgagtctGGtatGACCAGCTAATGAGACAATGGAATTC AAGAGATTCATTGTCTCATTAGCTGGGTTTTTGct  
cgagctggcgaattcc  
>CD\_NM\_000877.2:679  
CgCctGcgagtctGGtatGCACACATACTTGGGCAAGCAATTTCAAGAGAATTGCTTGCCCAAGTATGTGTATTTTTTGct  
cgagctggcgaattcc  
>CD\_NM\_000877.2:556  
CgCctGcgagtctGGtatGAAGTGGTATAAGGATTGCAAACCTTCAAGAGAGTTTGAATCCTTATACCACTGTTTTTGct  
cgagctggcgaattcc  
>CD\_NM\_000877.2:1749  
CgCctGcgagtctGGtatGCAAGGAGAACTGCAAAGAGAGTTCAAGAGACTCTCTTTGCAGTTTCTCCTTATTTTTTGct  
cgagctggcgaattcc  
>CD\_NM\_000877.2:1163

CgCctGcgagtctGGtatGCTGACATTGTGCTTTGGTACAGTTCAAGAGACTGTACCAAAGCACAATGTCAATTTTTGct  
cgagctggcgaattcc  
>CD\_NM\_000877.2:300  
CgCctGcgagtctGGtatGAATTCATCAACACAAAGAGAAATTCAGAGATTTCTCTTTGTGTTGATGAATCTTTTTGct  
cgagctggcgaattcc  
>CD\_NM\_000877.2:618  
CgCctGcgagtctGGtatGCAGGCTCATCGTGATGAATGTGTTCAAGAGACACATTCATCACGATGAGCCTATTTTTGct  
cgagctggcgaattcc  
>CD\_NM\_000877.2:1044  
CgCctGcgagtctGGtatGCGCAGCATATATCCAGTTAATATTCAAGAGATATTAAGTGGATATATGCTGCATTTTTGct  
cgagctggcgaattcc  
>CD\_NM\_004633:312  
CgCctGcgagtctGGtatGACCGGTTTCGTGGGAGGCATTATTCAAGAGATAATGCCTCCCACGAAACCGGCTTTTTGct  
cgagctggcgaattcc  
>CD\_NM\_004633:234  
CgCctGcgagtctGGtatGCGCGCTTGTACGTGTTGGTAATTTCAAGAGAATTACCAACACGTACAAGCGCATTTTTGct  
cgagctggcgaattcc  
>CD\_NM\_004633:1387  
CgCctGcgagtctGGtatGCTGGCCTCATCATCAAGACTTTTTCAAGAGAAAAGTCTTGATGATGAGGCCATTTTTGct  
cgagctggcgaattcc  
>CD\_NM\_004633:310  
CgCctGcgagtctGGtatGATGCCGTTTCGTGGGAGGCATTTCAAGAGAATGCCTCCCACGAAACCGGCAGTTTTGct  
cgagctggcgaattcc  
>CD\_NM\_004633:1105  
CgCctGcgagtctGGtatGAGGGCCACGCCAGGAATATTCAATTCAGAGATGAATATTCCTGGCGTGGCCCCTTTTGct  
cgagctggcgaattcc  
>CD\_NM\_004633:417  
CgCctGcgagtctGGtatGACCGCATCAACCTGACATGGCATTCAAGAGATGCCATGTCAGGTTGATGCGGGTTTTGct  
cgagctggcgaattcc  
>CD\_NM\_004633:820  
CgCctGcgagtctGGtatGAGCCCTGGAAGATGCTGGCTATTTCAAGAGAATAGCCAGCATCTTCCAGGGCCTTTTTGct  
cgagctggcgaattcc  
>CD\_NM\_004633.3:1334  
CgCctGcgagtctGGtatGCGCACAGACGGTGCAAACACAGTTCAAGAGACTGTGTTTTGCACCGTCTGTGCATTTTTGct  
cgagctggcgaattcc  
>CD\_NM\_004633.3:1176  
CgCctGcgagtctGGtatGCAGAGAGGATTTGCACATGGATTTCAAGAGAATCCATGTGCAAATCCTCTCTTTTTTTGct  
cgagctggcgaattcc  
>CD\_NM\_004633.3:795  
CgCctGcgagtctGGtatGAACTCACTTACTCGTACACGATTTCAAGAGAATCGTGTACGAGTAAGTGAAGTGTTTTTGct  
cgagctggcgaattcc  
>CD\_NM\_004633.3:1400  
CgCctGcgagtctGGtatGCAGACTTTCAATCCTATCCCAATTCAAGAGATTGGGATAGGATTGAAAGTCTTTTTTTGct  
cgagctggcgaattcc  
>CD\_NM\_004633.3:1381  
CgCctGcgagtctGGtatGATGCTATGGCCTCATCATCAAGTTCAAGAGACTTGATGATGAGGCCATAGCACTTTTTGct  
cgagctggcgaattcc  
>CD\_NM\_004633.3:984  
CgCctGcgagtctGGtatGCAGACTGACAATCCCGTGTAAGTTCAAGAGACTTACACGGGATTGTCAGTCTTTTTTTGct  
cgagctggcgaattcc  
>CD\_NM\_004633.3:861  
CgCctGcgagtctGGtatGCGCCCATGAAGGCCAGCAATACTTCAAGAGAGTATTGCTGGCCTTCATGGGCATTTTTGct  
cgagctggcgaattcc  
>CD\_NM\_004633.3:612

CgCctGcgagtctGGtatGCACAGATGCTTTCCTGCCGTTCTTCAAGAGAGAACGGCAGGAAAGCATCTGTATTTTTGct  
cgagctggcgaattcc  
>CD\_NM\_004633.3:234  
CgCctGcgagtctGGtatGACGCTTGTACGTGTTGGTAATGTTCAAGAGACATTACCAACACGTACAAGCGCTTTTTGct  
cgagctggcgaattcc  
>CD\_NM\_004633.3:621  
CgCctGcgagtctGGtatGCTTTCCTGCCGTTTCATCTCATACTTCAAGAGAGTATGAGATGAACGGCAGGAAATTTTTGct  
cgagctggcgaattcc  
>CD\_NM\_004633.3:753  
CgCctGcgagtctGGtatGCTTGGATAAAGACAATGAGAAATTCAGAGATTTCTCATTGTCTTTATCCAAATTTTTGct  
cgagctggcgaattcc  
>CD\_NM\_004633.3:1365  
CgCctGcgagtctGGtatGCGCAGATGGTCTGACTGTGCTATTCAAGAGATAGCACAGTCAGACCATCTGCTTTTTGct  
cgagctggcgaattcc  
>CD\_NM\_004633.3:1387  
CgCctGcgagtctGGtatGCGGCCATCATCAAGACTTTCTTCAAGAGAGAAAGTCTTGATGATGAGGCCATTTTTGct  
cgagctggcgaattcc  
>CD\_NM\_004633.3:1396  
CgCctGcgagtctGGtatGAATCAAGACTTTCAATCCTATCTTCAAGAGAGATAGGATTGAAAGTCTTGATGTTTTGct  
cgagctggcgaattcc  
>CD\_NM\_004633.3:1004  
CgCctGcgagtctGGtatGCGGTGTTTCTGGGAACCGGCACTTCAAGAGAGTGCCGGTTCCAGAAACACCTTTTTGct  
cgagctggcgaattcc  
>CD\_NM\_004633.3:820  
CgCctGcgagtctGGtatGACCCTGGAAGATGCTGGCTATTTTTCAAGAGAAATAGCCAGCATCTTCCAGGGCTTTTTGct  
cgagctggcgaattcc  
>CD\_NM\_004633.3:417  
CgCctGcgagtctGGtatGACGCATCAACCTGACATGGCATTTCAGAGAAATGCCATGTCAGGTTGATGCGGTTTTGct  
cgagctggcgaattcc  
>CD\_NM\_004633.3:897  
CgCctGcgagtctGGtatGCATTGAGCTACGCATCAAGAAATTCAGAGATTTCTTGATGCGTAGCTCAATATTTTTGct  
cgagctggcgaattcc  
>CD\_NM\_004633.3:807  
CgCctGcgagtctGGtatGAGTACACGATGTGGCCCTGGAATTCAGAGATTCAGGGCCACATCGTGTACGTTTTGct  
cgagctggcgaattcc  
>CD\_NM\_004633.3:1293  
CgCctGcgagtctGGtatGACCACTTTCCTGCTGCTTCTTGTTCAGAGACAAGAAGGCCAGTGAAAGTGGGTTTTGct  
cgagctggcgaattcc  
>CD\_NM\_004633.3:233  
CgCctGcgagtctGGtatGCGCGCTTGTACGTGTTGGTAATTTCAAGAGAAATACCAACACGTACAAGCGCATTTTTGct  
cgagctggcgaattcc  
>CD\_NM\_004633.3:1405  
CgCctGcgagtctGGtatGCTTCAATCCTATCCCAAGTGAATTCAGAGATTCACTTGGGATAGGATTGAAATTTTTGct  
cgagctggcgaattcc  
>CD\_NM\_004633.3:840  
CgCctGcgagtctGGtatGCTACCGCTGTGTCCTGACATTTTTCAAGAGAAAATGTCAGGACACAGCGGTAATTTTTGct  
cgagctggcgaattcc  
>CD\_NM\_004633.3:1019  
CgCctGcgagtctGGtatGACGGCACACCCTTAACCACCATTTCAAGAGAAATGGTGGTTAAGGGTGTGCCGTTTTGct  
cgagctggcgaattcc  
>CD\_NM\_004633.3:450  
CgCctGcgagtctGGtatGCGCTAGGACGGTCCAGGAGAATTCAGAGATTCCTGCGGACCGTCCCTAGCATTTTTGct  
cgagctggcgaattcc  
>CD\_NM\_004633.3:1105

CgCtGcgagtctGGtatGAGGCCACGCCAGGAATATTCAGTTCAAGAGACTGAATATTCCTGGCGTGGCCCTTTTTGct  
cgagctggcgaattcc  
>CD\_NM\_000878:225  
CgCtGcgagtctGGtatGCCCCAGTTCACATGCTTCTACATTCAGAGATGTAGAAGCATGTGAACTGGGATTTTTGct  
cgagctggcgaattcc  
>CD\_NM\_000878:495  
CgCtGcgagtctGGtatGAAGGACTTCAAGCCCTTTGAGATTCAAGAGATCTCAAAGGGCTTGAAGTCCTGTTTTGct  
cgagctggcgaattcc  
>CD\_NM\_000878.2:225  
CgCtGcgagtctGGtatGACCAGTTCACATGCTTCTACAATTCAAGAGATTGTAGAAGCATGTGAACTGGGTTTTGct  
cgagctggcgaattcc  
>CD\_NM\_000878.2:918  
CgCtGcgagtctGGtatGCGCTGATCAACTGCAGGAACACTTCAAGAGAGTGTTCCTGCAGTTGATCAGCATTTTTGct  
cgagctggcgaattcc  
>CD\_NM\_000878.2:907  
CgCtGcgagtctGGtatGATTAGTGTACTTGTGATCAACTTCAAGAGAGTTGATCAGCAAGTACACTAAGTTTTGct  
cgagctggcgaattcc  
>CD\_NM\_000878.2:676  
CgCtGcgagtctGGtatGACTGCTGACTCTCAAGCAGAAGTTCAAGAGACTTCTGCTTGAGAGTCAGCAGTTTTGct  
cgagctggcgaattcc  
>CD\_NM\_000878.2:1191  
CgCtGcgagtctGGtatGAGCTGACCAGCTGCTTACCAATTCAAGAGATTGGTGAAGCAGCTGGTCAGCGTTTTGct  
cgagctggcgaattcc  
>CD\_NM\_000878.2:1594  
CgCtGcgagtctGGtatGACCTGAGCTGGTGTGCGAGAGTTCAAGAGACTCTCGCAGCACCAGCTCAGGGTTTTGct  
cgagctggcgaattcc  
>CD\_NM\_000878.2:495  
CgCtGcgagtctGGtatGCGGACTTCAAGCCCTTTGAGAATTCAAGAGATTCTCAAAGGGCTTGAAGTCCTTTTTGct  
cgagctggcgaattcc  
>CD\_NM\_000878.2:699  
CgCtGcgagtctGGtatGCGGAATGGATCTGCCTGGAGACTTCAAGAGAGTCTCCAGGCAGATCCATTCCTTTTTGct  
cgagctggcgaattcc  
>CD\_NM\_000878.2:601  
CgCtGcgagtctGGtatGATCCCCTACTTTGAAAGACACTTCAAGAGAGTGTCTTTCAAAGTAGTGGGAGTTTTGct  
cgagctggcgaattcc  
>CD\_NM\_000878.2:1399  
CgCtGcgagtctGGtatGAAGGGATGACCTGCTGCTTCTTCAAGAGAGAAGAGCAGCAGGTCATCCCTGTTTTGct  
cgagctggcgaattcc  
>CD\_NM\_000878.2:412  
CgCtGcgagtctGGtatGCTCTCAGAACTGACCACAGTTTTCAAGAGAACTGTGGTCAGTTCTGAGAATTTTTGct  
cgagctggcgaattcc  
>CD\_NM\_000878.2:1157  
CgCtGcgagtctGGtatGATGCCTGAGCCCGCATCCTTAATTCAAGAGATTAAGGATGCGGGCTCAGGCATTTTTGct  
cgagctggcgaattcc  
>CD\_NM\_000878.2:597  
CgCtGcgagtctGGtatGCAGCCTCCCCTACTTTGAAAGTTCAAGAGACTTCAAAGTAGTGGGAGGCTTTTTGct  
cgagctggcgaattcc  
>CD\_NM\_000878.2:183  
CgCtGcgagtctGGtatGACCTGGCTACCTCTTGGGCATCTTCAAGAGAGATGCCAAGAGGTAGCCAGGGTTTTGct  
cgagctggcgaattcc  
>CD\_NM\_000878.2:895  
CgCtGcgagtctGGtatGCGGCTTCATCATCTTAGTGTACTTCAAGAGAGTACACTAAGATGATGAAGCCATTTTTGct  
cgagctggcgaattcc  
>CD\_NM\_000878.2:375

CgCtGcgagtctGGtatGAATCCTGGGCCTGCAACCTGATTTCAAGAGAATCAGGTTGCAGGCCAGGATGTTTTTGct  
cgagctggcgaattcc  
>CD\_NM\_000878.2:252  
CgCtGcgagtctGGtatGAAGCCAACATCTCCTGTGTCTGTTCAAGAGACAGACACAGGAGATGTTGGCTCTTTTTGct  
cgagctggcgaattcc  
>CD\_NM\_000878.2:1161  
CgCtGcgagtctGGtatGATGAGCCCGCATCCTTAAGCAGTTCAAGAGACTGCTTAAGGATGCGGGCTCAGTTTTTGct  
cgagctggcgaattcc  
>CD\_NM\_000878.2:1129  
CgCtGcgagtctGGtatGAACGCAGCTGCTCCTGCAGCAGTTCAAGAGACTGCTGCAGGAGCAGCTGCGTCTTTTTGct  
cgagctggcgaattcc  
>CD\_NM\_000878.2:1237  
CgCtGcgagtctGGtatGACCGGATGCCTTGGAGATAGAGTTCAAGAGACTCTATCTCCAAGGCATCCGGGTTTTGct  
cgagctggcgaattcc  
>CD\_NM\_000878.2:1257  
CgCtGcgagtctGGtatGCGGCCTGCCAGGTGTACTTTACTTCAAGAGAGTAAAGTACACCTGGCAGGCCTTTTTGct  
cgagctggcgaattcc  
>CD\_NM\_000878.2:733  
CgCtGcgagtctGGtatGAACCCAGTATGAGTTTCAGGTGTTCAAGAGACACCTGAACTCATACTGGGTGTTTTGct  
cgagctggcgaattcc  
>CD\_NM\_000878.2:682  
CgCtGcgagtctGGtatGAACTCTCAAGCAGAAGCAGGAATTCAAGAGATTCCTGCTTCTGCTTGAGAGTCTTTTTGct  
cgagctggcgaattcc  
>CD\_NM\_000878.2:757  
CgCtGcgagtctGGtatGAGTCAAGCCTCTGCAAGGCGAGTTCAAGAGACTCGCCTTGCAGAGGCTTGACCTTTTTGct  
cgagctggcgaattcc  
>CD\_NM\_000878.2:558  
CgCtGcgagtctGGtatGCGGAGACCCACAGATGCAACATTTCAAGAGAATGTTGCATCTGTGGGTCTCCATTTTTGct  
cgagctggcgaattcc  
>CD\_NM\_000878.2:208  
CgCtGcgagtctGGtatGCGCGGTGAATGGCACTTCCCAGTTCAAGAGACTGGGAAGTGCCATTCACCGTTTTTGct  
cgagctggcgaattcc  
>CD\_NM\_000878.2:296  
CgCtGcgagtctGGtatGAACTTCCCTGCCAAGTCCATGTTCAAGAGACATGGACTTGGCAGGAAGTGTCTTTTTGct  
cgagctggcgaattcc  
>CD\_NM\_000878.2:897  
CgCtGcgagtctGGtatGACTTCATCATCTTAGTGTACTTTTTCAAGAGAAAGTACACTAAGATGATGAAGCTTTTTGct  
cgagctggcgaattcc  
>CD\_NM\_000878.2:472  
CgCtGcgagtctGGtatGACGATGGAGGGTGATGGCCATCTTCAAGAGAGATGGCCATCACCTCCATCGTTTTTGct  
cgagctggcgaattcc  
>CD\_NM\_000878.2:1291  
CgCtGcgagtctGGtatGATCAGAGGAAGACCCTGATGAGTTCAAGAGACTCATCAGGGTCTTCTCTGAGTTTTGct  
cgagctggcgaattcc  
>CD\_NM\_000878.2:946  
CgCtGcgagtctGGtatGCTGGCTGAAGAAGGTCCTGAAGTTCAAGAGACTCAGGACCTTCTCAGCCATTTTTGct  
cgagctggcgaattcc  
>CD\_NM\_002183:458  
CgCtGcgagtctGGtatGAAGCAGTTGACCTGGGACCTTATTCAAGAGATAAGGTCCAGGTCAACTGCTGTTTTGct  
cgagctggcgaattcc  
>CD\_NM\_002183:668  
CgCtGcgagtctGGtatGACGGAGAATCTGACCTGCTGGATTCAAGAGATCCAGCAGGTGAGATTCTCCGTTTTGct  
cgagctggcgaattcc  
>CD\_NM\_002183:836

CgCctGcgagtctGGtatGCTCGGGTGTCTTCGATGACATTCAAGAGATGTCATCGAAACGACACCCGATTTTTTgct  
cgagctggcgaattcc  
>CD\_NM\_002183:979  
CgCctGcgagtctGGtatGCCCCAACATGACTGCAAAGTGTTCGAAGAGAACACTTTCAGTCATGTTGGTTTTTTgct  
cgagctggcgaattcc  
>CD\_NM\_002183:1057  
CgCctGcgagtctGGtatGCCGCTATGAGCTTCAGATACAATTCAAGAGATTGTATCTGAAGCTCATAGCGATTTTTGct  
cgagctggcgaattcc  
>CD\_NM\_002183:1168  
CgCctGcgagtctGGtatGCGCCCGGGAAAGAGTGTATGAATTCAAGAGATTCATACACTCTTTCCCGGGCTTTTTTgct  
cgagctggcgaattcc  
>CD\_NM\_002183:1056  
CgCctGcgagtctGGtatGCTCGCTATGAGCTTCAGATACATTCAAGAGATGTATCTGAAGCTCATAGCGAATTTTTGct  
cgagctggcgaattcc  
>CD\_NM\_002183:1167  
CgCctGcgagtctGGtatGAAGCCCGGGAAAGAGTGTATGATTCAAGAGATCATACTCTTTCCCGGGCTTTTTTgct  
cgagctggcgaattcc  
>CD\_NM\_002183.2:458  
CgCctGcgagtctGGtatGCGCAGTTGACCTGGGACCTTAATTCAAGAGATTAAGGTCCAGGTCAACTGCTTTTTTgct  
cgagctggcgaattcc  
>CD\_NM\_002183.2:975  
CgCctGcgagtctGGtatGCCACCCAACATGACTGCAAAGTTCGAAGAGACTTTCAGTCATGTTGGGTGGATTTTTGct  
cgagctggcgaattcc  
>CD\_NM\_002183.2:1323  
CgCctGcgagtctGGtatGAAGAAGGTATCTGGTGATGCAGTTCAAGAGACTGCATCACCAGATACCTTCTGTTTTTgct  
cgagctggcgaattcc  
>CD\_NM\_002183.2:1032  
CgCctGcgagtctGGtatGAAGAAGTCATTTCAATCGCAAATTCGAAGAGATTTGCGATTGAAATGACTTCTTTTTTgct  
cgagctggcgaattcc  
>CD\_NM\_002183.2:863  
CgCctGcgagtctGGtatGAACTCTCCAGCGTTCTCAAAGTTCGAAGAGACTTTCGAGAACCGCTGGAGAGTCTTTTTGct  
cgagctggcgaattcc  
>CD\_NM\_002183.2:470  
CgCctGcgagtctGGtatGAGGACCTTAACAGAAATGTGACTTCAAGAGAGTCACATTTCTGTTAAGGTCCTTTTTgct  
cgagctggcgaattcc  
>CD\_NM\_002183.2:360  
CgCctGcgagtctGGtatGCTGGCTCACGCTGCTCCTGATCTTCAAGAGAGATCAGGAGCAGCGTGAGCCAATTTTTGct  
cgagctggcgaattcc  
>CD\_NM\_002183.2:1299  
CgCctGcgagtctGGtatGACTGGTCTGTGCTTTCGTGATCTTCAAGAGAGATCACGAAGACACAGACCAGGTTTTTgct  
cgagctggcgaattcc  
>CD\_NM\_002183.2:419  
CgCctGcgagtctGGtatGCCCCACCAATCACGAACCTAAGTTCGAAGAGACTTAGGTTTCGTGATTGGTGGGTTTTTgct  
cgagctggcgaattcc  
>CD\_NM\_002183.2:933  
CgCctGcgagtctGGtatGAACAGATAAGTTTGTCTCTTTTTCAAGAGAAAAGACGACAACTTATCTGTGTTTTTgct  
cgagctggcgaattcc  
>CD\_NM\_002183.2:1057  
CgCctGcgagtctGGtatGAGCTATGAGCTTCAGATACAATTCAAGAGATTTGTATCTGAAGCTCATAGCGTTTTTgct  
cgagctggcgaattcc  
>CD\_NM\_002183.2:1440  
CgCctGcgagtctGGtatGAGAGGAGTGCTGGTGACTGAATTCAAGAGATTCAGTCACCAGACACTCCTCCTTTTTGct  
cgagctggcgaattcc  
>CD\_NM\_002183.2:465



CgCctGcgagtctGGtatGAACCTGGGACCTTAACAGAAATTTCAAGAGAATTTCTGTTAAGGTCCCAGGTCTTTTTGct  
cgagctggcgaattcc  
>CD\_NM\_002183.2:1307  
CgCctGcgagtctGGtatGATGTCTTCGTGATCTGCAGAAGTTCAAGAGACTTCTGCAGATCACGAAGACACTTTTTGct  
cgagctggcgaattcc  
>CD\_NM\_002183.2:687  
CgCctGcgagtctGGtatGAATTCATGACGTGGATTTCTTGTTC AAGAGACAAGAAATCCACGTCATGAATCTTTTTGct  
cgagctggcgaattcc  
>CD\_NM\_002183.2:387  
CgCctGcgagtctGGtatGACCCTGTCTCCTGCAAACGAAGTTCAAGAGACTTCGTTTGCAGGAGACAGGGCTTTTTGct  
cgagctggcgaattcc  
>CD\_NM\_002183.2:489  
CgCctGcgagtctGGtatGAACCGATATCGAGTGTGTTAAATTTCAAGAGATTTAACACACTCGATATCGGTCTTTTTGct  
cgagctggcgaattcc  
>CD\_NM\_002183.2:1056  
CgCctGcgagtctGGtatGCCGCTATGAGCTTCAGATACAATTTCAAGAGATTGTATCTGAAGCTCATAGCGATTTTTGct  
cgagctggcgaattcc  
>CD\_NM\_002183.2:608  
CgCctGcgagtctGGtatGCCCCACCATTCTCCACGTGGATTTCAAGAGAATCCACGTGGAGAATGGTGGGTTTTTTGct  
cgagctggcgaattcc  
>CD\_NM\_002183.2:1301  
CgCctGcgagtctGGtatGCGGTCTGTGTCTTCGTGATCTGTTCAAGAGACAGATCACGAAGACACAGACCATTTTTGct  
cgagctggcgaattcc  
>CD\_NM\_002183.2:403  
CgCctGcgagtctGGtatGCCGAAGGAAGATCCAAACCCACTTCAAGAGAGTGGGTTTGGATCTTCCTTCGTTTTTTGct  
cgagctggcgaattcc  
>CD\_NM\_002183.2:988  
CgCctGcgagtctGGtatGCCTGCAAAGTGTAATAAGACACTTCAAGAGAGTGTCTTATTACACTTTGCAGTTTTTTGct  
cgagctggcgaattcc  
>CD\_NM\_002183.2:1356  
CgCctGcgagtctGGtatGACGCATCCCTCACATGAAAGACTTCAAGAGAGTCTTTCATGTGAGGGATGCGGTTTTTTGct  
cgagctggcgaattcc  
>CD\_NM\_002183.2:453  
CgCctGcgagtctGGtatGAGCTCAGCAGTTGACCTGGGACTTCAAGAGAGTCCCAGGTCAACTGCTGAGCCTTTTTGct  
cgagctggcgaattcc  
>CD\_NM\_002183.2:792  
CgCctGcgagtctGGtatGATACGAGTGTCTTCACTACAAATTTCAAGAGATTTGTAGTGAAGACACTCGTACTTTTTGct  
cgagctggcgaattcc  
>CD\_NM\_000418:685  
CgCctGcgagtctGGtatGACCCTGACAATTACCTGTATAATTTCAAGAGATTATACAGGTAATTGTCAGGGGTTTTTTGct  
cgagctggcgaattcc  
>CD\_NM\_000418:745  
CgCctGcgagtctGGtatGCCCCGGCAGATTT CAGAATCTATTCAAGAGATAGATTCTGAAATCTGCCGGGTTTTTTGct  
cgagctggcgaattcc  
>CD\_NM\_000418:976  
CgCctGcgagtctGGtatGCGGCCGTCTGCCTGTTGTGCTATTCAAGAGATAGCACAACAGGCAGACGGCCATTTTTGct  
cgagctggcgaattcc  
>CD\_NM\_000418:1051  
CgCctGcgagtctGGtatGACCGCAGCCGCTCGTGGCTATTTCAAGAGAATAGCCACGAGGCGGCTGCGGGTTTTTTGct  
cgagctggcgaattcc  
>CD\_NM\_000418:1233  
CgCctGcgagtctGGtatGCTGCCTTTCCAGGGCTCTGGAATTTCAAGAGATTCAGAGCCCTGGAAAGGCATTTTTTTGct  
cgagctggcgaattcc  
>CD\_NM\_000418:2590

CgCtGcgagtctGGtatGAGGGCATCTCAGAGAAGAGTAATTCAAGAGATTACTCTTCTCTGAGATGCCCGTTTTTGct  
cgagctggcgaattcc  
>CD\_NM\_000418:1055  
CgCtGcgagtctGGtatGAAGCCGCTCGTGGCTATAATAATTCAAGAGATATTATAGCCACGAGGCGGCTTTTTTGct  
cgagctggcgaattcc  
>CD\_NM\_000418:746  
CgCtGcgagtctGGtatGACCGGCAGATTTCAAGAACTATTTCAAGAGAATAGATTCTGAAATCTGCCGGTTTTTGct  
cgagctggcgaattcc  
>CD\_NM\_000418.2:685  
CgCtGcgagtctGGtatGACCTGACAATTACCTGTATAATTTCAAGAGAATTATACAGGTAATTGTCAGGGTTTTTGct  
cgagctggcgaattcc  
>CD\_NM\_000418.2:996  
CgCtGcgagtctGGtatGCTGTCAGCATCACCAGATTAATTCAAGAGATTAATCTTGGTGATGCTGACATTTTTTGct  
cgagctggcgaattcc  
>CD\_NM\_000418.2:556  
CgCtGcgagtctGGtatGCGGGCAGCAGCTGCTGTGGAAGTTCAAGAGACTTCCACAGCAGCTGCTGCCATTTTTTGct  
cgagctggcgaattcc  
>CD\_NM\_000418.2:976  
CgCtGcgagtctGGtatGAGCCGCTGCCTGTTGTGCTATTTCAAGAGAATAGCACAAACAGGCAGACGGCCTTTTTTGct  
cgagctggcgaattcc  
>CD\_NM\_000418.2:1459  
CgCtGcgagtctGGtatGCACAGAGAGCCTGTTTCTGGACTTCAAGAGAGTCCAGGAACAGGCTCTCTGTTTTTTTTGct  
cgagctggcgaattcc  
>CD\_NM\_000418.2:496  
CgCtGcgagtctGGtatGATGCCACCTGCTCATGGATGACTTCAAGAGAGTCATCCATGAGCAGGTGGCACTTTTTGct  
cgagctggcgaattcc  
>CD\_NM\_000418.2:1056  
CgCtGcgagtctGGtatGACCGCCTCGTGGCTATAATAATTTCAAGAGAATATTATAGCCACGAGGCGGCTTTTTTGct  
cgagctggcgaattcc  
>CD\_NM\_000418.2:981  
CgCtGcgagtctGGtatGCCTGCCTGTTGTGCTATGTCAGTTCAAGAGACTGACATAGCACAAACAGGCAGATTTTTTGct  
cgagctggcgaattcc  
>CD\_NM\_000418.2:1471  
CgCtGcgagtctGGtatGATTCTGGACCTGCTCGGAGAGTTCAAGAGACTCTCCGAGCAGGTCCAGGAACTTTTTGct  
cgagctggcgaattcc  
>CD\_NM\_000418.2:753  
CgCtGcgagtctGGtatGCTTTCAGAACTATAACGTGACTTCAAGAGAGTCACGTTATAGATTCTGAAATTTTTTGct  
cgagctggcgaattcc  
>CD\_NM\_000418.2:1955  
CgCtGcgagtctGGtatGCCAGTGGCTATCAGGAGTTTGTTCAGAGACAACTCCTGATAGCCACTGGTTTTTTTTGct  
cgagctggcgaattcc  
>CD\_NM\_000418.2:2586  
CgCtGcgagtctGGtatGACTCGGGCATCTCAGAGAAGAGTTCAAGAGACTTCTCTCTGAGATGCCCGAGTTTTTGct  
cgagctggcgaattcc  
>CD\_NM\_000418.2:849  
CgCtGcgagtctGGtatGACTGGGCTCAGTGCTATAAACTTCAAGAGAGTGTATAGCACTGAGCCAGTTTTTGct  
cgagctggcgaattcc  
>CD\_NM\_000418.2:567  
CgCtGcgagtctGGtatGCGCTGTGGAAGGGCTCCTTCAATTCAAGAGATTGAAGGAGCCCTTCCACAGCATTTTTTGct  
cgagctggcgaattcc  
>CD\_NM\_000418.2:1055  
CgCtGcgagtctGGtatGCGCCGCTCGTGGCTATAATAATTCAAGAGATATTATAGCCACGAGGCGGCTTTTTTGct  
cgagctggcgaattcc  
>CD\_NM\_000418.2:1440

CgCctGcgagtctGGtatGCGGGCATTGTGGCCCGCTAACTTCAAGAGAGTTAGCCGGGCCACAATGCCCTTTTTTGct  
cgagctggcgaattcc  
>CD\_NM\_000418.2:1903  
CgCctGcgagtctGGtatGACGCCGAAATGTCTCCAGCATTTC AAGAGAATGCTGGAGGACATTT CGGCGTTTTTGct  
cgagctggcgaattcc  
>CD\_NM\_000418.2:2263  
CgCctGcgagtctGGtatGACCAGAGCACCTGGGTCTGGAGTTCAAGAGACTCCAGACCCAGGTGCTCTGGGTTTTTGct  
cgagctggcgaattcc  
>CD\_NM\_000418.2:616  
CgCctGcgagtctGGtatGACCAGGAAACCTGACAGTTCACTTCAAGAGAGTGAAGTGTGAGGTTTCTGGGTTTTTGct  
cgagctggcgaattcc  
>CD\_NM\_000418.2:2359  
CgCctGcgagtctGGtatGACTGGGCAGTGGCATTGTCTACTTCAAGAGAGTAGACAATGCCACTGCCAGGTTTTTGct  
cgagctggcgaattcc  
>CD\_NM\_000418.2:307  
CgCctGcgagtctGGtatGATCTGGGAACATGAAGGTCTTGTTC AAGAGACAAGACCTTCATGTTCCAGAGTTTTTGct  
cgagctggcgaattcc  
>CD\_NM\_000418.2:301  
CgCctGcgagtctGGtatGAGCAAGCTCTGGGAACATGAAGTTCAAGAGACTTCATGTTCCAGAGCTTGCCTTTTTTGct  
cgagctggcgaattcc  
>CD\_NM\_000418.2:1385  
CgCctGcgagtctGGtatGAGGAGCTTCTGTGCATCGCCTGTTCAAGAGACAGGCGATGCACAGAAGCTCCCTTTTTTGct  
cgagctggcgaattcc  
>CD\_NM\_000418.2:2688  
CgCctGcgagtctGGtatGACGTGGGACCCACATACATGAGTTCAAGAGACTCATGTATGTGGGTCCCACGGTTTTTGct  
cgagctggcgaattcc  
>CD\_NM\_000418.2:1219  
CgCctGcgagtctGGtatGAGCTGCCAAAGAGATGCCTTTCTTCAAGAGAGAAAGGCATCTCTTTGGCAGCCTTTTTTGct  
cgagctggcgaattcc  
>CD\_NM\_000564:672  
CgCctGcgagtctGGtatGCAGCTGACTTACTTCTTGATGATTCAAGAGATCATCAGGAAGTAAGTCAGCTTTTTTTTGct  
cgagctggcgaattcc  
>CD\_NM\_000564:711  
CgCctGcgagtctGGtatGAACCTGTCAATTTACCATTAATTC AAGAGATTAATGGTGA AATTGACAGGTGTTTTTTGct  
cgagctggcgaattcc  
>CD\_NM\_000564:850  
CgCctGcgagtctGGtatGCACCAGAATCACTGAAAGCAAATTC AAGAGATTTGCTTTTCAGTGATTCTGGTTTTTTTTGct  
cgagctggcgaattcc  
>CD\_NM\_000564:990  
CgCctGcgagtctGGtatGATGGAACCTCAATTGTGAATTTTTTCAAGAGAAAATTCACAATTGAGGTTCCAGTTTTTTGct  
cgagctggcgaattcc  
>CD\_NM\_000564:1308  
CgCctGcgagtctGGtatGCTGCCCTTACGCCATTGATCATTCAAGAGATGATCAATGGCGTGAAGGGCAATTTTTTGct  
cgagctggcgaattcc  
>CD\_NM\_000564:1486  
CgCctGcgagtctGGtatGAACCAATGCATTCATCTCAATATTC AAGAGATATTGAGATGAATGCATTGGTCTTTTTTGct  
cgagctggcgaattcc  
>CD\_NM\_000564:708  
CgCctGcgagtctGGtatGCCCCACCTGTCAATTTACCATTTCAAGAGAAATGGTGA AATTGACAGGTGGGATTTTTTGct  
cgagctggcgaattcc  
>CD\_NM\_000564.2:708  
CgCctGcgagtctGGtatGCCCTGTCAATTTACCATTAATTC AAGAGATTTAATGGTGA AATTGACAGGTTTTTTTGct  
cgagctggcgaattcc  
>CD\_NM\_000564.2:1338

CgCctGcgagtctGGtatGCCACTGAATGTCACAGCAGAGTTCAAGAGACTCTGCTGTGACATTCAGTGGATTTTTGct  
cgagctggcgaattcc  
>CD\_NM\_000564.2:1242  
CgCctGcgagtctGGtatGATGGCTTGC GG TGTGTTAACTTCAAGAGAGTTAACAAGCACCGCAAGCCAGTTTTGct  
cgagctggcgaattcc  
>CD\_NM\_000564.2:850  
CgCctGcgagtctGGtatGCCAGAATCACTGAAAGCAAATTTCAAGAGAATTTGCTTTCAGTGATTCTGGTTTTTTGct  
cgagctggcgaattcc  
>CD\_NM\_000564.2:1414  
CgCctGcgagtctGGtatGCTCCATTGCTTTGATTATGAAGTTCAAGAGACTTCATAATCAAAGCAATGGATTTTTTTGct  
cgagctggcgaattcc  
>CD\_NM\_000564.2:657  
CgCctGcgagtctGGtatGAACTGAGATACTGCAAGCTGACTTCAAGAGAGTCAGCTTGCAGTATCTCAGTGTTTTTGct  
cgagctggcgaattcc  
>CD\_NM\_000564.2:1596  
CgCctGcgagtctGGtatGCCCTATTTATGTGGGAAATGATTTCAAGAGAATCATTCCCACATAAATAGGTTTTTTGct  
cgagctggcgaattcc  
>CD\_NM\_000564.2:1801  
CgCctGcgagtctGGtatGCCAGTGAGACGGAAATTGAAGTTCAAGAGACTTCAATTTCCGTCTCACTGGATTTTTGct  
cgagctggcgaattcc  
>CD\_NM\_000564.2:1628  
CgCctGcgagtctGGtatGACTTGAGAGAGTGGTTTGTCAATTTCAAGAGAATGACAAACCACTCTCTCAAGTTTTTTGct  
cgagctggcgaattcc  
>CD\_NM\_000564.2:1371  
CgCctGcgagtctGGtatGCCGTCTCTCTATCCAATGGGAGTTCAAGAGACTCCCATTGGATAGAGAGACGATTTTTGct  
cgagctggcgaattcc  
>CD\_NM\_000564.2:1683  
CgCctGcgagtctGGtatGCATTCTCTCGCTTATCTGTAAATTTCAAGAGATTTACAGATAAGCGAGAGAATTTTTTTGct  
cgagctggcgaattcc  
>CD\_NM\_000564.2:763  
CgCctGcgagtctGGtatGCGGAAACCAAATCCTGATCAAGTTCAAGAGACTTGATCAGGATTTGGTTCCATTTTTGct  
cgagctggcgaattcc  
>CD\_NM\_000564.2:774  
CgCctGcgagtctGGtatGCCCTGATCAAGAGCAAAGGAATTTCAAGAGAATTCCTTTGCTCTTGATCAGGATTTTTGct  
cgagctggcgaattcc  
>CD\_NM\_000564.2:1308  
CgCctGcgagtctGGtatGCGCCCTTACGCCATTGATCAATTTCAAGAGATTGATCAATGGCGTGAAGGGCATTTTTGct  
cgagctggcgaattcc  
>CD\_NM\_000564.2:1410  
CgCctGcgagtctGGtatGCCCAATCCATTGCTTTGATTATTTCAAGAGAATAATCAAAGCAATGGATTGGATTTTTTTGct  
cgagctggcgaattcc  
>CD\_NM\_000564.2:1506  
CgCctGcgagtctGGtatGCATTGATGATCTTCTAAGTACTTCAAGAGAGTACTTAGAAAGATCATCAATTTTTTTGct  
cgagctggcgaattcc  
>CD\_NM\_000564.2:1658  
CgCctGcgagtctGGtatGCGGCAACCATCTGCTTCATCTTTTCAAGAGAAAGATGAAGCAGATGGTTGCCATTTTTGct  
cgagctggcgaattcc  
>CD\_NM\_000564.2:986  
CgCctGcgagtctGGtatGATCCTGGAACCTCAATTGTGAATTTCAAGAGATTACAATTGAGGTTCCAGGAGTTTTTTGct  
cgagctggcgaattcc  
>CD\_NM\_000564.2:946  
CgCctGcgagtctGGtatGCGCAGCTGGGCTTCTGCTGAACTTCAAGAGAGTTCAAGAGAGTTCCAGGAGTTTTTTGct  
cgagctggcgaattcc  
>CD\_NM\_000564.2:1498

CgCctGcgagtctGGtatGCTCTCAATAATTGATGATCTTTTTCAAGAGAAAAGATCATCAATTATTGAGATTTTTTGct  
cgagctggcgaattcc  
>CD\_NM\_000564.2:949  
CgCctGcgagtctGGtatGCGCTGGGCTTCTGCTGAACTTCTTCAAGAGAGAAGTTCAGCAGAAGCCCAGCTTTTTTGct  
cgagctggcgaattcc  
>CD\_NM\_000564.2:1676  
CgCctGcgagtctGGtatGCCTTGTTAATTCTCTCGCTTATTTCAAGAGAATAAGCGAGAGAATTAACAAGATTTTTTGct  
cgagctggcgaattcc  
>CD\_NM\_000564.2:1812  
CgCctGcgagtctGGtatGAGAAATTGAAGTCATCTGTTATTTCAAGAGAATAACAGATGACTTCAATTTCTTTTTGct  
cgagctggcgaattcc  
>CD\_NM\_000564.2:1649  
CgCctGcgagtctGGtatGCTGTGATTATGGCAACCATCTGTTCAAGAGACAGATGGTTGCCATAATCACAATTTTTGct  
cgagctggcgaattcc  
>CD\_NM\_000564.2:619  
CgCctGcgagtctGGtatGCTCATCGTGGCGCATGTATTACTTCAAGAGAGTAATACATGCGCCACGATGATTTTTTGct  
cgagctggcgaattcc  
>CD\_NM\_000564.2:1409  
CgCctGcgagtctGGtatGCTCCAATCCATTGCTTTGATTATTCAAGAGATAATCAAAGCAATGGATTGGAATTTTTGct  
cgagctggcgaattcc  
>CD\_NM\_000565:786  
CgCctGcgagtctGGtatGACCCAGCTCTCCTGCTTCCGGATTCAAGAGATCCGGAAGCAGGAGAGCTGGGGTTTTTGct  
cgagctggcgaattcc  
>CD\_NM\_000565:948  
CgCctGcgagtctGGtatGCCCCAGAAGTTCTCCTGCCAGTTTTCAAGAGAACTGGCAGGAGAACTTCTGGGATTTTTGct  
cgagctggcgaattcc  
>CD\_NM\_000565:1208  
CgCctGcgagtctGGtatGCCGGGCTGAACGGTCAAAGACATTTCAAGAGATGTCTTTGACCGTTCAGCCCGATTTTTGct  
cgagctggcgaattcc  
>CD\_NM\_000565.2:607  
CgCctGcgagtctGGtatGCGTTCCTGCTGCTCAGGAAGTTCAAGAGACTTCCTGAGCACCCAGTGAACATTTTTGct  
cgagctggcgaattcc  
>CD\_NM\_000565.2:1502  
CgCctGcgagtctGGtatGATGCAAGATTTCTTCTTCAGTACTTCAAGAGAGTACTGAAGAAGAATCTTGCACTTTTTGct  
cgagctggcgaattcc  
>CD\_NM\_000565.2:1798  
CgCctGcgagtctGGtatGAAGCCCTTATGACATCAGCAATTTCAAGAGAATTGCTGATGTCATAAGGGCTTTTTTGct  
cgagctggcgaattcc  
>CD\_NM\_000565.2:1430  
CgCctGcgagtctGGtatGAAGGCACTTACTACTAATAAAGTTCAAGAGACTTTATTAGTAGTAAGTGCCTGTTTTTGct  
cgagctggcgaattcc  
>CD\_NM\_000565.2:1215  
CgCctGcgagtctGGtatGCACGGTCAAAGACATTCACAACTTCAAGAGAGTTGTGAATGTCTTTGACCGTTTTTTTGct  
cgagctggcgaattcc  
>CD\_NM\_000565.2:698  
CgCctGcgagtctGGtatGATCCACGACTCTGGAACTATTTTCAAGAGAAATAGTTTCCAGAGTCGTGGAGTTTTTGct  
cgagctggcgaattcc  
>CD\_NM\_000565.2:1441  
CgCctGcgagtctGGtatGCACTAATAAAGACGATGATAATTTCAAGAGAATTATCATCGTCTTTATTAGTATTTTTGct  
cgagctggcgaattcc  
>CD\_NM\_000565.2:748  
CgCctGcgagtctGGtatGAACTGTGCACTTGTGTTGGATTTCAAGAGAATCCACCAGCAAGTGCACAGTCTTTTTGct  
cgagctggcgaattcc  
>CD\_NM\_000565.2:1548

CgCctGcgagtctGGtatGAAGGGAGCCTGGCCTTCGGAAC TTCAAGAGAGTCCGAAGGCCAGGCTCCCTCTTTTTGct  
cgagctggcgaattcc  
>CD\_NM\_000565.2:1432  
CgCctGcgagtctGGtatGAGCACTTACTACTAATAAAGACTTCAAGAGAGTCTTTATTAGTAGTAAGTGCCTTTTTGct  
cgagctggcgaattcc  
>CD\_NM\_000565.2:1002  
CgCctGcgagtctGGtatGCAGTGTCCATGTGCGTCGCCAGTTCAAGAGACTGGCGACGCACATGGACACTATTTTTGct  
cgagctggcgaattcc  
>CD\_NM\_000565.2:1227  
CgCctGcgagtctGGtatGAATTCACAACATGGATGGTCAATTCAAGAGATTGACCATCCATGTTGTGAATGTTTTGct  
cgagctggcgaattcc  
>CD\_NM\_000565.2:871  
CgCctGcgagtctGGtatGAGCTGTGCTCTTGGTGAGGAAGTTCAAGAGACTTCCTCACCAAGAGCACAGCCTTTTTGct  
cgagctggcgaattcc  
>CD\_NM\_000565.2:1582  
CgCctGcgagtctGGtatGCGCCATTGTTCTGAGGTTCAAGTTCAAGAGACTTGAACCTCAGAACAATGGCATTTTTTGct  
cgagctggcgaattcc  
>CD\_NM\_000565.2:786  
CgCctGcgagtctGGtatGACCAGCTCTCCTGCTTCCGGAATTCAAGAGATTCCGGAAGCAGGAGAGCTGGTTTTGct  
cgagctggcgaattcc  
>CD\_NM\_000565.2:1258  
CgCctGcgagtctGGtatGACATCACTGTGTCATCCACGACTTCAAGAGAGTCGTGGATGACACAGTGATGCTTTTTGct  
cgagctggcgaattcc  
>CD\_NM\_000565.2:1132  
CgCctGcgagtctGGtatGATGGCTCAGTGTACCTGGCAATTCAAGAGATTGCCAGGTGACACTGAGCCAGTTTTGct  
cgagctggcgaattcc  
>CD\_NM\_000565.2:1186  
CgCctGcgagtctGGtatGCCTACGGTTGAGCTCAGATATTTCAAGAGAATATCTGAGCTCAAACCGTAGTTTTGct  
cgagctggcgaattcc  
>CD\_NM\_000565.2:1161  
CgCctGcgagtctGGtatGCCTCCTGGAATCATCTTTCTATTCAAGAGATAGAAAGATGAGTTCCAGGAGTTTTGct  
cgagctggcgaattcc  
>CD\_NM\_000565.2:814  
CgCctGcgagtctGGtatGACTCAGCAATGTTGTTTGTGAGTTCAAGAGACTCACAAACAACATTGCTGAGTTTTGct  
cgagctggcgaattcc  
>CD\_NM\_000565.2:1018  
CgCctGcgagtctGGtatGAGCCAGTAGTGTGCGGAGCAAGTTCAAGAGACTTGCTCCCGACACTACTGGCGTTTTGct  
cgagctggcgaattcc  
>CD\_NM\_000565.2:650  
CgCctGcgagtctGGtatGCGCAGATGGGCTGGCATGGGAATTCAAGAGATTCCCATGCCAGCCATCTGCTTTTTGct  
cgagctggcgaattcc  
>CD\_NM\_000565.2:882  
CgCctGcgagtctGGtatGCGGTGAGGAAGTTTCAGAACAGTTCAAGAGACTGTTCTGAAACTTCTCACCATTTTTGct  
cgagctggcgaattcc  
>CD\_NM\_000565.2:865  
CgCctGcgagtctGGtatGAACAAAGGCTGTGCTCTTGGTGTTCAGAGACACCAAGAGCACAGCCTTGTCTTTTTGct  
cgagctggcgaattcc  
>CD\_NM\_000565.2:1426  
CgCctGcgagtctGGtatGAATGCAGGCACTTACTACTAATTTCAAGAGAATTAGTAGTAAGTGCCTGCATGTTTTGct  
cgagctggcgaattcc  
>CD\_NM\_000565.2:742  
CgCctGcgagtctGGtatGCGCTGGGACTGTGCACTTGCTGTTCAAGAGACAGCAAGTGCACAGTCCCAGCTTTTTGct  
cgagctggcgaattcc  
>CD\_NM\_000565.2:1456

CgCctGcgagtctGGtatGCGATAATATTCCTTCAGAGATTTCAAGAGAATCTCTGAAGAGAATATTATCATTTTTTGct  
cgagctggcgaattcc  
>CD\_NM\_000565.2:1428  
CgCctGcgagtctGGtatGCGCAGGCACTTACTACTAATAATTCAAGAGATTATTAGTAGTAAGTGCCTGCATTTTTTGct  
cgagctggcgaattcc  
>CD\_NM\_000565.2:1208  
CgCctGcgagtctGGtatGAGGGCTGAACGGTCAAAGACATTTCAAGAGAATGTCTTTGACCGTTCAGCCGTTTTTTGct  
cgagctggcgaattcc  
>CD\_NM\_000565.2:1579  
CgCctGcgagtctGGtatGAATTGCCATTGTTCTGAGGTTCTTCAAGAGAGAACCTCAGAACAATGGCAATGTTTTTTGct  
cgagctggcgaattcc  
>CD\_NM\_002185:145  
CgCctGcgagtctGGtatGATGGAGAAAAGTGGCTATGCTCATTCAAGAGATGAGCATAGCCACTTTCTCCAGTTTTTTGct  
cgagctggcgaattcc  
>CD\_NM\_002185:515  
CgCctGcgagtctGGtatGCGCCAATGACTTTGTGGTGACATTCAAGAGATGTCACCACAAAGTCATTGGCTTTTTTTGct  
cgagctggcgaattcc  
>CD\_NM\_002185:648  
CgCctGcgagtctGGtatGCAGCTGACACTCCTGCAGAGAATTCAAGAGATTCTCTGCAGGAGTGCAGCTTTTTTTGct  
cgagctggcgaattcc  
>CD\_NM\_002185:677  
CgCctGcgagtctGGtatGCCCGCAGCAATGTATGAGATTTTTCAAGAGAAATCTCATAACATTGCTGCCGGTTTTTTGct  
cgagctggcgaattcc  
>CD\_NM\_002185:678  
CgCctGcgagtctGGtatGACGGCAGCAATGTATGAGATTATTCAAGAGATAATCTCATAACATTGCTGCCGGTTTTTTGct  
cgagctggcgaattcc  
>CD\_NM\_002185:287  
CgCctGcgagtctGGtatGAACCAATCTGGAATTTGAAATATTCAAGAGATATTTCAAATTCAGATTGGTGTTTTTTTGct  
cgagctggcgaattcc  
>CD\_NM\_002185.2:198  
CgCctGcgagtctGGtatGCCTACTCATTCTCATGCTATAGTTCAAGAGACTATAGCATGAGAATGAGTAGTTTTTTGct  
cgagctggcgaattcc  
>CD\_NM\_002185.2:1130  
CgCctGcgagtctGGtatGCACTGCCCATCTGAGGATGTAGTTCAAGAGACTACATCCTCAGATGGGCAGTTTTTTTgct  
cgagctggcgaattcc  
>CD\_NM\_002185.2:1409  
CgCctGcgagtctGGtatGATGGGATCAAATCAAGAAGAAGTTCAAGAGACTTCTTCTTGATTTGATCCCAGTTTTTTGct  
cgagctggcgaattcc  
>CD\_NM\_002185.2:862  
CgCctGcgagtctGGtatGATTGGCCTGTGTGTTATGGAAATTCAAGAGATTTCCATAACACACAGGCCAAGTTTTTTGct  
cgagctggcgaattcc  
>CD\_NM\_002185.2:841  
CgCctGcgagtctGGtatGATCTGTGCTCTGTTGGTCATCTTCAAGAGAGATGACCAACAGAGCGACAGAGTTTTTTGct  
cgagctggcgaattcc  
>CD\_NM\_002185.2:373  
CgCctGcgagtctGGtatGAACAAAGAAATCTTACTGATTTTTCAAGAGAAATCAGTAAGAATTTCTTTGTCTTTTTTTGct  
cgagctggcgaattcc  
>CD\_NM\_002185.2:450  
CgCctGcgagtctGGtatGCAGACCTAACCACATAGTTAATTCAAGAGATTAACATAGTGGTTAGGTCTATTTTTTTGct  
cgagctggcgaattcc  
>CD\_NM\_002185.2:1434  
CgCctGcgagtctGGtatGCTGTACCATGTCCAGCTTCTATTCAAGAGATAGAAGCTGGACATGGTGACATTTTTTTGct  
cgagctggcgaattcc  
>CD\_NM\_002185.2:519

CgCtGcgagtctGGtatGCTGACTTTGTGGTGACATTTAATTCAAGAGATTAAATGTCACCACAAAGTCATTTTTTgct  
cgagctggcgaattcc  
>CD\_NM\_002185.2:931  
CgCtGcgagtctGGtatGAACTCTGGAACATCTTTGTAAGTTCAAGAGACTTACAAAGATGTTCCAGAGCTTTTTTgct  
cgagctggcgaattcc  
>CD\_NM\_002185.2:321  
CgCtGcgagtctGGtatGCGGAGGTAAAGTGCCTGAATTTTTCAAGAGAAAATTCAGGCACTTTACCTCCATTTTTGct  
cgagctggcgaattcc  
>CD\_NM\_002185.2:283  
CgCtGcgagtctGGtatGAATCACCAATCTGGAATTTGAATTCAAGAGATTCAAATTCAGATTGGTGATGTTTTTgct  
cgagctggcgaattcc  
>CD\_NM\_002185.2:974  
CgCtGcgagtctGGtatGATGAGTTTCAATCCTGAAAGTTTTCAAGAGAACTTTCAGGATTGAAACTCACTTTTTgct  
cgagctggcgaattcc  
>CD\_NM\_002185.2:682  
CgCtGcgagtctGGtatGCGCAATGTATGAGATTAAAGTTTTCAAGAGAACTTTAATCTCATACTGCTTTTTTgct  
cgagctggcgaattcc  
>CD\_NM\_002185.2:1383  
CgCtGcgagtctGGtatGATCAGGGTCAGCCATTCTTACTTCAAGAGAGTAAGAATGGGCTGACCCCTGAGTTTTTgct  
cgagctggcgaattcc  
>CD\_NM\_002185.2:354  
CgCtGcgagtctGGtatGCAGAGATATATTTTCATCGAGACTTCAAGAGAGTCTCGATGAAATATATCTTTTTTgct  
cgagctggcgaattcc  
>CD\_NM\_002185.2:1256  
CgCtGcgagtctGGtatGCGCAGGGAGAGTGGCAAGAATGTTCAAGAGACATCTTGCCACTCTCCCTGCATTTTTTgct  
cgagctggcgaattcc  
>CD\_NM\_002185.2:627  
CgCtGcgagtctGGtatGCTGTGAATTTATCCAGCACAAATTCAGAGATTTGTGCTGGATAAATTCACATTTTTTgct  
cgagctggcgaattcc  
>CD\_NM\_002185.2:331  
CgCtGcgagtctGGtatGATGCCTGAATTTTCAGGAACTATTCAAGAGATAGTTTCCTGAAATTCAGGCACTTTTTGct  
cgagctggcgaattcc  
>CD\_NM\_002185.2:379  
CgCtGcgagtctGGtatGAAAATCTTACTGATTGGAAAGTTCAAGAGACTTTCCAATCAGTAAGAATTTCTTTTTGct  
cgagctggcgaattcc  
>CD\_NM\_002185.2:1276  
CgCtGcgagtctGGtatGCGGGCCTCATGTGTACCAGGACTTCAAGAGAGTCTGGTACACATGAGGCCATTTTTGct  
cgagctggcgaattcc  
>CD\_NM\_002185.2:1245  
CgCtGcgagtctGGtatGAGTCCCTAGACTGCAGGGAGAGTTCAAGAGACTCTCCCTGCAGCTAGGGACCTTTTTGct  
cgagctggcgaattcc  
>CD\_NM\_002185.2:1009  
CgCtGcgagtctGGtatGAATTCATAGGGTGGATGACATTTTTCAAGAGAAATGTCATCCACCCTATGAATTTTTTgct  
cgagctggcgaattcc  
>CD\_NM\_002185.2:935  
CgCtGcgagtctGGtatGATGGAACATCTTTGTAAGAACTTCAAGAGAGTTTCTTACAAAGATGTTCCAGTTTTTgct  
cgagctggcgaattcc  
>CD\_NM\_002185.2:243  
CgCtGcgagtctGGtatGCGCACTCACTGACCTGTGCTTTTTTCAAGAGAAAAGCACAGGTCAGTGAGTGCTTTTTTgct  
cgagctggcgaattcc  
>CD\_NM\_002185.2:970  
CgCtGcgagtctGGtatGCAATGTGAGTTTCAATCCTGAATTCAAGAGATTGAGGATTGAAACTCACATTTTTTgct  
cgagctggcgaattcc  
>CD\_NM\_002185.2:1170



CgCtGcgagtctGGtatGCTGGAAGAGATTCATCCCTCACTTCAAGAGAGTGAGGGATGAATCTCTTCCAATTTTTGct  
cgagctggcgaattcc  
>CD\_NM\_176786:996  
CgCtGcgagtctGGtatGCCCCTTGTTGCTGTGTCCATCTTTCAAGAGAAGATGGACACAGCAACAAGGGTTTTTTGct  
cgagctggcgaattcc  
>CD\_NM\_176786:1262  
CgCtGcgagtctGGtatGCGGCCAGCGCTCCTTGAAATTC AAGAGATTTCCAAGGACGCGCTGGGCCATTTTTGct  
cgagctggcgaattcc  
>CD\_NM\_176786:1536  
CgCtGcgagtctGGtatGAACCTCTCAGCCCTCCAGGAATTC AAGAGATTCCTGGGAGGGCTGAGAGGTGTTTTGct  
cgagctggcgaattcc  
>CD\_NM\_176786:840  
CgCtGcgagtctGGtatGAAGGCCAGGCTGCGTGTCCAGATTCAAGAGATCTGGACACGCAGCCTGGCCTTTTTGct  
cgagctggcgaattcc  
>CD\_NM\_002186:840  
CgCtGcgagtctGGtatGAAGGCCAGGCTGCGTGTCCAGATTCAAGAGATCTGGACACGCAGCCTGGCCTTTTTGct  
cgagctggcgaattcc  
>CD\_NM\_002186:996  
CgCtGcgagtctGGtatGCCCCTTGTTGCTGTGTCCATCTTTCAAGAGAAGATGGACACAGCAACAAGGGTTTTTTGct  
cgagctggcgaattcc  
>CD\_NM\_002186:1262  
CgCtGcgagtctGGtatGCGGCCAGCGCTCCTTGAAATTC AAGAGATTTCCAAGGACGCGCTGGGCCATTTTTGct  
cgagctggcgaattcc  
>CD\_NM\_002186:1536  
CgCtGcgagtctGGtatGAACCTCTCAGCCCTCCAGGAATTC AAGAGATTCCTGGGAGGGCTGAGAGGTGTTTTGct  
cgagctggcgaattcc  
>CD\_NM\_002186:1583  
CgCtGcgagtctGGtatGCGCCCTGGCCTGTGGCCTTTCTTTCAAGAGAAGAAAGGCCACAGGCCAGGGCTTTTTGct  
cgagctggcgaattcc  
>CD\_NM\_002186:759  
CgCtGcgagtctGGtatGAAGGCCAGCACAGGGATCACATTCAAGAGATGTGATCCCTGTGCTGGCCTGTTTTGct  
cgagctggcgaattcc  
>CD\_NM\_002186.2:1262  
CgCtGcgagtctGGtatGAGCCCAGCGCTCCTTGAAATTC AAGAGAATTTCCAAGGACGCGCTGGCCTTTTTGct  
cgagctggcgaattcc  
>CD\_NM\_002186.2:1702  
CgCtGcgagtctGGtatGACTCCCTTCTGTCTCAGCAAGTTCAAGAGACTTGCTGAGGACAGAAGGGAGCTTTTTGct  
cgagctggcgaattcc  
>CD\_NM\_002186.2:258  
CgCtGcgagtctGGtatGCGGCCCTGCATCTGCATCTGCACTTCAAGAGAGTGCAGATGCAGATGCAGGCCATTTTTGct  
cgagctggcgaattcc  
>CD\_NM\_002186.2:1068  
CgCtGcgagtctGGtatGCGAAGAGAATCTTCTACCAGAATTC AAGAGATTC TGGTAGAAGATTCTTTCATTTTTGct  
cgagctggcgaattcc  
>CD\_NM\_002186.2:1033  
CgCtGcgagtctGGtatGACCGACCTACCTCCTGTTCAAGTTCAAGAGACTTGAACAGGAGGTAGGTGGGTTTTGct  
cgagctggcgaattcc  
>CD\_NM\_002186.2:1057  
CgCtGcgagtctGGtatGATCGCCCAGGGTGAAGAGAATCTTCAAGAGAGATTCCTTACCCTGGGCGACTTTTTGct  
cgagctggcgaattcc  
>CD\_NM\_002186.2:1390  
CgCtGcgagtctGGtatGACTTGCTATCTGCCACAGGAGTTCAAGAGACTCCTGTGGCAGATAGGCAAGCTTTTTGct  
cgagctggcgaattcc  
>CD\_NM\_002186.2:1129

CgCctGcgagtctGGtatGCGTACACAATGGGAACTTCCAGTTCAAGAGACTGGAAGTCCCATTGTGTACATTTTTTGct  
cgagctggcgaattcc  
>CD\_NM\_002186.2:871  
CgCctGcgagtctGGtatGAGAGGATGATGTGGTAGAGGAGTTCAAGAGACTCCTCTACCACATCATCCTCCTTTTTTGct  
cgagctggcgaattcc  
>CD\_NM\_002186.2:505  
CgCctGcgagtctGGtatGAGCAGTGCTCGTGCCATCTGACTTCAAGAGAGTCAGATGGCAGCAGCACTGCCTTTTTTGct  
cgagctggcgaattcc  
>CD\_NM\_002186.2:252  
CgCctGcgagtctGGtatGAGCTCCTGGCCTGCATCTGCATTTCAAGAGAATGCAGATGCAGGCCAGGAGCCTTTTTTGct  
cgagctggcgaattcc  
>CD\_NM\_002186.2:507  
CgCctGcgagtctGGtatGAAGTGCTCGTGCCATCTGACAATTCAAGAGATTGTCAGATGGCAGCAGCACTGTTTTTGct  
cgagctggcgaattcc  
>CD\_NM\_002186.2:220  
CgCctGcgagtctGGtatGAAGTGAGGCCCTGAGGCGAGACTTCAAGAGAGTCTCGCCTCAGGGCCTCACTTTTTTGct  
cgagctggcgaattcc  
>CD\_NM\_002186.2:1282  
CgCctGcgagtctGGtatGCTCTGTGGCCCTGGAGGAGGAATTCAAGAGATTCTCCTCCAGGGCCACAGATTTTTTGct  
cgagctggcgaattcc  
>CD\_NM\_002186.2:484  
CgCctGcgagtctGGtatGAACCGTCTGTGCTGCCACCTGAGTTCAAGAGACTCAGGTGGCAGCACGACGGTGTTTTTTGct  
cgagctggcgaattcc  
>CD\_NM\_002186.2:439  
CgCctGcgagtctGGtatGAGCTCCTGGCGGCACACATAAGTTCAAGAGACTTATGTGTGCCGCCAGGAGCCTTTTTTGct  
cgagctggcgaattcc  
>CD\_NM\_002186.2:630  
CgCctGcgagtctGGtatGATGACTTGCAGAGCAACATCAGTTCAAGAGACTGATGTTGCTCTGCAAGTCAGTTTTTGct  
cgagctggcgaattcc  
>CD\_NM\_002186.2:625  
CgCctGcgagtctGGtatGACCCTCTGACTTGCAGAGCAACTTCAAGAGAGTTGCTCTGCAAGTCAGAGGGCCTTTTTTGct  
cgagctggcgaattcc  
>CD\_NM\_002186.2:922  
CgCctGcgagtctGGtatGAAGCCAGCCTGTGTGCTTCCAGTTCAAGAGACTGGAAGCACACAGGCTGGCTTTTTTGct  
cgagctggcgaattcc  
>CD\_NM\_002186.2:1666  
CgCctGcgagtctGGtatGAAGGCCTGGGCTGCATGAGGACTTCAAGAGAGTCTCATGCAGCCCAGGCCTTTTTTGct  
cgagctggcgaattcc  
>CD\_NM\_002186.2:349  
CgCctGcgagtctGGtatGAACCAACAACATTCTCAGGATCTTCAAGAGAGATCCTGAGAATGTTGTTGGTGTTTTTTGct  
cgagctggcgaattcc  
>CD\_NM\_002186.2:1171  
CgCctGcgagtctGGtatGAGCCGGTGTGCTGTTGAGCCAGTTCAAGAGACTGGCTCAACAGCACACCGGCCTTTTTTGct  
cgagctggcgaattcc  
>CD\_NM\_002186.2:1003  
CgCctGcgagtctGGtatGCGCTGTGTCCATCTTCTCCTGTTCAAGAGACAGGAGAAAGATGGACACAGCATTTTTTGct  
cgagctggcgaattcc  
>CD\_NM\_002184:274  
CgCctGcgagtctGGtatGCGGCTAGTGCAAGCCTTGTTTATTCAAGAGATAACAAGGCTTGCACTAGCCATTTTTTGct  
cgagctggcgaattcc  
>CD\_NM\_002184:513  
CgCctGcgagtctGGtatGCTCCAGTGTACCTTTACAGATTTCAAGAGAATCTGTAAAGGTGACACTGGATTTTTTGct  
cgagctggcgaattcc  
>CD\_NM\_002184:715

CgCtGcgagtctGGtatGCTGGAGACAACTTCACTTTAATTCAAGAGATTAAAGTGAAGTTTGTCTCCAATTTTTGct  
cgagctggcgaattcc  
>CD\_NM\_002184:792  
CgCtGcgagtctGGtatGAACCTCATGCACTGTTGATTATTTCAAGAGAATAATCAACAGTGCATGAGGTGTTTTGct  
cgagctggcgaattcc  
>CD\_NM\_002184:2472  
CgCtGcgagtctGGtatGCAGCATTTCTAGCAGTGATGAATTTCAAGAGATTCATCACTGCTAGAAATGCTTTTTTGTct  
cgagctggcgaattcc  
>CD\_NM\_002184:2627  
CgCtGcgagtctGGtatGCGCGGCCAGAAGATCTACAATTTTCAAGAGAAATTGTAGATCTTCTGGCCGCTTTTTTGTct  
cgagctggcgaattcc  
>CD\_NM\_002184:1680  
CgCtGcgagtctGGtatGCACCGTGCATCGCACCTATTTATTCAAGAGATAAATAGGTGCGATGCACGGTATTTTTGct  
cgagctggcgaattcc  
>CD\_NM\_002184:917  
CgCtGcgagtctGGtatGCGCCCAATCCGCCACATAATTTTCAAGAGAAAATTATGTGGCGGATTGGGCTTTTTTGTct  
cgagctggcgaattcc  
>CD\_NM\_002184:789  
CgCtGcgagtctGGtatGACCCACCTCATGCACTGTTGATTTTCAAGAGAATCAACAGTGCATGAGGTGGGTTTTTGTct  
cgagctggcgaattcc  
>CD\_NM\_002184:1589  
CgCtGcgagtctGGtatGATCCAAGGGAATCTGTAAAGAATTTCAAGAGATTCCTTTACAGATTCCTTGGAGTTTTTGTct  
cgagctggcgaattcc  
>CD\_NM\_002184.2:389  
CgCtGcgagtctGGtatGCGCAGTTTGTGTGCTAAAGGAATTTCAAGAGATTCCTTTAGCACACAAACTGCATTTTTTGTct  
cgagctggcgaattcc  
>CD\_NM\_002184.2:851  
CgCtGcgagtctGGtatGCGCAGAGAATGCCCTTGGGAAGTTCAAGAGACTTCCCAAGGGCATTCTCTGCTTTTTTGTct  
cgagctggcgaattcc  
>CD\_NM\_002184.2:2161  
CgCtGcgagtctGGtatGAAGTGCTGTTCTGCTTTAATAATTTCAAGAGATTATTAAGCAGAACAGCACTTTTTTGTct  
cgagctggcgaattcc  
>CD\_NM\_002184.2:715  
CgCtGcgagtctGGtatGCGGAGACAACTTCACTTTAATTCAAGAGATTTAAAGTGAAGTTTGTCTCCATTTTTGct  
cgagctggcgaattcc  
>CD\_NM\_002184.2:1714  
CgCtGcgagtctGGtatGAAGAGAGCAAATGCTATTTGATTTCAAGAGAATCAAATAGCATTTGCTCTCTGTTTTTGTct  
cgagctggcgaattcc  
>CD\_NM\_002184.2:348  
CgCtGcgagtctGGtatGCGTCTGAATCTCCAGTTGTACTTCAAGAGAGTACAACCTGGAGATTCAGGACTTTTTTGTct  
cgagctggcgaattcc  
>CD\_NM\_002184.2:1415  
CgCtGcgagtctGGtatGAACAGTAAATCTCACAAATGATTTCAAGAGAATCATTGTGAGATTTACTGTCTTTTTGct  
cgagctggcgaattcc  
>CD\_NM\_002184.2:2628  
CgCtGcgagtctGGtatGAGGCCAGAAGATCTACAATTAGTTCAAGAGACTAATTGTAGATCTTCTGGCCGTTTTTGTct  
cgagctggcgaattcc  
>CD\_NM\_002184.2:1777  
CgCtGcgagtctGGtatGCATCCATAAAGGCATACCTTAATTTCAAGAGATTAAGGTATGCCTTTATGGATTTTTTGTct  
cgagctggcgaattcc  
>CD\_NM\_002184.2:1130  
CgCtGcgagtctGGtatGCACAGAATATGTGTTTAGGATTTTCAAGAGAAATCCTAAACACATATTTGTATTTTTGct  
cgagctggcgaattcc  
>CD\_NM\_002184.2:1653

CgCtGcgagtctGGtatGCTCACAGACTGGCAACAAGAAGTTCAAGAGACTTCTTGTGGCCAGTCTGTGATTTTTTgct  
cgagctggcgaattcc  
>CD\_NM\_002184.2:792  
CgCtGcgagtctGGtatGCCCTCATGCACTGTTGATTATTTTCAAGAGAAATAATCAACAGTGCATGAGGTTTTTgct  
cgagctggcgaattcc  
>CD\_NM\_002184.2:2942  
CgCtGcgagtctGGtatGAACTGATGAAGGCATGCCTAAATTTCAAGAGATTTAGGCATGCCTTCATCAGTCTTTTTGct  
cgagctggcgaattcc  
>CD\_NM\_002184.2:1621  
CgCtGcgagtctGGtatGCGTGGTGTGTGTTATCAGATAATTTCAAGAGATTATCTGATAACACACACCCTTTTTGct  
cgagctggcgaattcc  
>CD\_NM\_002184.2:1743  
CgCtGcgagtctGGtatGCCTCCAGTATATGCTGATGGACTTCAAGAGAGTCCATCAGCATATACTGGAGTTTTTgct  
cgagctggcgaattcc  
>CD\_NM\_002184.2:753  
CgCtGcgagtctGGtatGAACAAGTTTGTGATTGCAAAGTTCAAGAGACTTTGCAATCAGCAAACCTGTGTTTTGct  
cgagctggcgaattcc  
>CD\_NM\_002184.2:2366  
CgCtGcgagtctGGtatGCCCAGAAGATCTGAAATCATTGTTCAAGAGACAATGATTTTCAAGATCTTCTGGATTTTTGct  
cgagctggcgaattcc  
>CD\_NM\_002184.2:303  
CgCtGcgagtctGGtatGCCACTGAATCTACAGGTGAACTTCAAGAGAGTTCACCTGTAGATTCAGTGGTTTTTgct  
cgagctggcgaattcc  
>CD\_NM\_002184.2:1590  
CgCtGcgagtctGGtatGACAAGGGAATCTGTAAAGAAATTTCAAGAGAAATTTCTTTACAGATTCCTTGGTTTTTgct  
cgagctggcgaattcc  
>CD\_NM\_002184.2:1500  
CgCtGcgagtctGGtatGCTCCCTGCCTGTGACTTTCAAGTTCAAGAGACTTGAAAGTCACAGGCAGGGATTTTTGct  
cgagctggcgaattcc  
>CD\_NM\_002184.2:1527  
CgCtGcgagtctGGtatGAACCTGTAATGGATCTTAAAGTTCAAGAGACTTTAAGATCCATTACAGGGTTTTTTgct  
cgagctggcgaattcc  
>CD\_NM\_002184.2:873  
CgCtGcgagtctGGtatGATTACATCAGATCATATCAATTTTCAAGAGAAATTTGATATGATCTGATGTAACTTTTTgct  
cgagctggcgaattcc  
>CD\_NM\_002184.2:2805  
CgCtGcgagtctGGtatGAAGATTTTCAGATCATATTTCACTTCAAGAGAGTGAAATATGATCTGAAATCTGTTTTTgct  
cgagctggcgaattcc  
>CD\_NM\_000395:835  
CgCtGcgagtctGGtatGAAGCTCGGTCTCCTTTGGCCTATTCAAGAGATAGGCCAAAGGAGACCGAGCTGTTTTTgct  
cgagctggcgaattcc  
>CD\_NM\_000395:975  
CgCtGcgagtctGGtatGCCGGCCAATACATCGTCTCTGTTTCAAGAGAACAGAGACGATGTATTGGCCGTTTTTgct  
cgagctggcgaattcc  
>CD\_NM\_000395:1436  
CgCtGcgagtctGGtatGATGCGCAGAAAGTGGGAGGAGATTCAAGAGATCTCCTCCACTTTCTGCGCAGTTTTTgct  
cgagctggcgaattcc  
>CD\_NM\_000395:1775  
CgCtGcgagtctGGtatGAAGGCTTCCAGCTTTGACTTCATTCAAGAGATGAAGTCAAAGCTGGAAGCCTGTTTTTgct  
cgagctggcgaattcc  
>CD\_NM\_000395:2520  
CgCtGcgagtctGGtatGACCCTCTCTCGCTCCGGAGTAATTTCAAGAGATTACTCCGGAGCGAGAGAGGGCTTTTTGct  
cgagctggcgaattcc  
>CD\_NM\_000395.1:2520

CgCctGcgagtctGGtatGACCTCTCTCGCTCCGGAGTAAATTCAAGAGATTTACTCCGGAGCGAGAGAGGGTTTTTgct  
cgagctggcgaattcc  
>CD\_NM\_000395.1:1016  
CgCctGcgagtctGGtatGCACACATAAAGAGCTCAGTGAATTCAAGAGATTCACCTGAGCTCTTTATGTGTTTTTTTTgct  
cgagctggcgaattcc  
>CD\_NM\_000395.1:1332  
CgCctGcgagtctGGtatGAACCGAGTCGGTGCCTATGTTCAAGAGACATAGGCAGCACCGACTCGGTGTTTTTgct  
cgagctggcgaattcc  
>CD\_NM\_000395.1:1436  
CgCctGcgagtctGGtatGCGCGCAGAAAAGTGGGAGGAGAATTCAAGAGATTCCTCTCCACTTTCTGCGCATTTTTTgct  
cgagctggcgaattcc  
>CD\_NM\_000395.1:579  
CgCctGcgagtctGGtatGAGCAGCCATCCTCCTCTCCAACCTCAAGAGAGTTGGAGAGGAGGATGGCTGCGTTTTTgct  
cgagctggcgaattcc  
>CD\_NM\_000395.1:1085  
CgCctGcgagtctGGtatGACTACAGCCTGCGCTGGGAAACTTCAAGAGAGTTTCCCAGCGCAGGCTGTAGCTTTTTTgct  
cgagctggcgaattcc  
>CD\_NM\_000395.1:1654  
CgCctGcgagtctGGtatGCAGCATGTCTGTGATCCACCATTTCAAGAGAATGGTGGATCACAGACATGCTTTTTTTgct  
cgagctggcgaattcc  
>CD\_NM\_000395.1:2631  
CgCctGcgagtctGGtatGACCCGTCATTCAGCTCTTCAAATTTCAAGAGATTTGAAGAGCTGAATGACGGGCTTTTTTgct  
cgagctggcgaattcc  
>CD\_NM\_000395.1:1753  
CgCctGcgagtctGGtatGACCTCCCACACACCTGAGAACTTCAAGAGAGTTTCTCAGGTGTGTGGGAGGCTTTTTTgct  
cgagctggcgaattcc  
>CD\_NM\_000395.1:1056  
CgCctGcgagtctGGtatGCTCCCTCAACGTGACCAAGGATTTCAAGAGAATCCTTGGTCACGTTGAGGGATTTTTTgct  
cgagctggcgaattcc  
>CD\_NM\_000395.1:116  
CgCctGcgagtctGGtatGCGCAGACCCTGCGCTGCTACAATTTCAAGAGATTGTAGCAGCGCAGGGTCTGCATTTTTTgct  
cgagctggcgaattcc  
>CD\_NM\_000395.1:2460  
CgCctGcgagtctGGtatGAGGCCTCCTTGTCTGCTGAGCAATTTCAAGAGATTGCTGCAGGACAAGGAGGCCTTTTTgct  
cgagctggcgaattcc  
>CD\_NM\_000395.1:396  
CgCctGcgagtctGGtatGAACCGTCACTCTGACCCAGCATTTTCAAGAGAATGCTGGGTGAGAGTGACGGTGTTTTTTgct  
cgagctggcgaattcc  
>CD\_NM\_000395.1:2556  
CgCctGcgagtctGGtatGCCCCGGTCTGAGATCAAGAACTTCAAGAGAGTTCTTGATCTCAGGACCGGGTTTTTTgct  
cgagctggcgaattcc  
>CD\_NM\_000395.1:982  
CgCctGcgagtctGGtatGCACATCGTCTCTGTTTCAAGCAATTTCAAGAGATTGGCTGAACAGAGACGATGTATTTTTTgct  
cgagctggcgaattcc  
>CD\_NM\_000395.1:1971  
CgCctGcgagtctGGtatGAGGACAGGCCGTGGAAGTGGAGTTCAAGAGACTCCACTTCCACGGCCTGTCCTTTTTgct  
cgagctggcgaattcc  
>CD\_NM\_000395.1:314  
CgCctGcgagtctGGtatGATGTCATTCCTGCCAGAGTTTTTTCAAGAGAAAACCTGCGCAGGGAATGACACTTTTTTgct  
cgagctggcgaattcc  
>CD\_NM\_000395.1:1517  
CgCctGcgagtctGGtatGAAGGCAGCATGTCGGCCTTCACTTCAAGAGAGTGAAGGCCGACATGCTGCCGTTTTTTgct  
cgagctggcgaattcc  
>CD\_NM\_000395.1:2652

CgCctGcgagtctGGtatGCGCCCTGAAGCAGCAGGACTACTTCAAGAGAGTAGTCCTGCTGCTTCAGGGCTTTTTTgct  
cgagctggcgaattcc  
>CD\_NM\_000395.1:1425  
CgCctGcgagtctGGtatGAGGGTACAGGCTGCGCAGAAAGTTCAAGAGACTTCTGCGCAGCCTGTACCCGTTTTTgct  
cgagctggcgaattcc  
>CD\_NM\_000395.1:2305  
CgCctGcgagtctGGtatGCAGTCAGGGTTTGGGGCTATGTTCAAGAGACATAGCCCTCAAACCCTGACTTTTTTgct  
cgagctggcgaattcc  
>CD\_NM\_000395.1:336  
CgCctGcgagtctGGtatGCGTCGTCCTGACTGACTACTTCAAGAGAGTAGTCAACGTCAGTGACGACATTTTTGct  
cgagctggcgaattcc  
>CD\_NM\_000395.1:1364  
CgCctGcgagtctGGtatGACCTCATCGTGATCTTCTCACTTCAAGAGAGTGAGGAAGATCACGATGAGGGTTTTGct  
cgagctggcgaattcc  
>CD\_NM\_000395.1:1687  
CgCctGcgagtctGGtatGCCGACTCCAGCTGCCTCAGATCTTCAAGAGAGATCTGAGGCAGCTGGAGTCGTTTTTgct  
cgagctggcgaattcc  
>CD\_NM\_000395.1:204  
CgCctGcgagtctGGtatGAACCCATTCGCCGGGTGAATTTCAAGAGAATCACCCGGCGAATGAGGGTCTTTTTGct  
cgagctggcgaattcc  
>CD\_NM\_000395.1:2454  
CgCctGcgagtctGGtatGACCCGAGGGCCTCCTTGTCTGTTCAAGAGACAGGACAAGGAGGCCCTCGGGCTTTTTGct  
cgagctggcgaattcc  
>CD\_NM\_000395.1:1362  
CgCctGcgagtctGGtatGAGCCCTCATCGTGATCTTCTCTTCAAGAGAGAGGAAGATCACGATGAGGGCCTTTTTGct  
cgagctggcgaattcc  
>CD\_NM\_000395.1:626  
CgCctGcgagtctGGtatGCGCACCTCATGCCAGCAGCACTTCAAGAGAGTGCTGCTGGGCATGAGGTGCTTTTTGct  
cgagctggcgaattcc  
>CD\_NM\_000206:611  
CgCctGcgagtctGGtatGCCAATCAGTGGATTATAGACATTTCAAGAGAATGTCTATAATCCACTGATTGTTTTTgct  
cgagctggcgaattcc  
>CD\_NM\_000206:813  
CgCctGcgagtctGGtatGATTGGCTCCATGGGATTGATTATTTCAAGAGATAATCAATCCCATGGAGCCAATTTTTGct  
cgagctggcgaattcc  
>CD\_NM\_000206:994  
CgCctGcgagtctGGtatGCACGACTCTGCCTCGTCAGTGATTCAAGAGATCACTGACGAGGCAGAGTCGTTTTTgct  
cgagctggcgaattcc  
>CD\_NM\_000206:935  
CgCctGcgagtctGGtatGCTCGGCCTGGAGTGGTGTGTCTTTCAAGAGAAGACACACCACTCCAGGCCGAATTTTTGct  
cgagctggcgaattcc  
>CD\_NM\_000206:886  
CgCctGcgagtctGGtatGACACCCTGAAGAACCTAGAGGATTCAAGAGATCCTCTAGGTTCTTCAGGGTGGTTTTTgct  
cgagctggcgaattcc  
>CD\_NM\_000206.1:964  
CgCctGcgagtctGGtatGAGCTGAGAGTCTGCAGCCAGACTTCAAGAGAGTCTGGCTGCAGACTCTCAGCCTTTTTGct  
cgagctggcgaattcc  
>CD\_NM\_000206.1:813  
CgCctGcgagtctGGtatGCTGGCTCCATGGGATTGATTATTTCAAGAGAATAATCAATCCCATGGAGCCAATTTTTGct  
cgagctggcgaattcc  
>CD\_NM\_000206.1:898  
CgCctGcgagtctGGtatGACTAGAGGATCTTGTACTGAATTTCAAGAGATTCAGTAACAAGATCCTCTAGGTTTTTgct  
cgagctggcgaattcc  
>CD\_NM\_000206.1:994

CgCctGcgagtctGGtatGCCGACTCTGCCTCGTCAGTGAGTTCAAGAGACTCACTGACGAGGCAGAGTCGTTTTTTGct  
cgagctggcgaattcc  
>CD\_NM\_000206.1:701  
CgCctGcgagtctGGtatGATCTGTGGAAGTGCTCAGCATTTTTCAAGAGAAATGCTGAGCACTTCCACAGAGTTTTTTGct  
cgagctggcgaattcc  
>CD\_NM\_000206.1:596  
CgCctGcgagtctGGtatGAACAGCTGGACTGAACAATCAGTTCAAGAGACTGATTGTTTCAGTCCAGCTGTGTTTTTTGct  
cgagctggcgaattcc  
>CD\_NM\_000206.1:506  
CgCctGcgagtctGGtatGATGAGTGAATCCCAGCTAGAACTTCAAGAGAGTTCTAGCTGGGATTCCTCAGTTTTTTGct  
cgagctggcgaattcc  
>CD\_NM\_000206.1:97  
CgCctGcgagtctGGtatGAACGCCCAATGGGAATGAAGACTTCAAGAGAGTCTTCATTCCCATTGGGCGTCTTTTTTTGct  
cgagctggcgaattcc  
>CD\_NM\_000206.1:319  
CgCctGcgagtctGGtatGAAGCCACTATCTATTCTCTGAATTCAAGAGATTCAGAGAATAGATAGTGGCTGTTTTTTGct  
cgagctggcgaattcc  
>CD\_NM\_000206.1:347  
CgCctGcgagtctGGtatGCCTTCTGGCTGTCAGTTGCAAATTCAGAGATTTGCAACTGACAGCCAGAAGTTTTTTTgct  
cgagctggcgaattcc  
>CD\_NM\_000206.1:372  
CgCctGcgagtctGGtatGCGGAGATCCACCTCTACCAAACCTTCAAGAGAGTTTGGTAGAGGTGGATCTCCTTTTTTTGct  
cgagctggcgaattcc  
>CD\_NM\_000206.1:695  
CgCctGcgagtctGGtatGCACCCACTCTGTGGAAGTGCTCTTCAAGAGAGAGCACTTCCACAGAGTGGGTTTTTTTTGct  
cgagctggcgaattcc  
>CD\_NM\_000206.1:324  
CgCctGcgagtctGGtatGCCTATCTATTCTCTGAAGAAATTTCAAGAGAATTTCTTCAGAGAATAGATAGTTTTTTTgct  
cgagctggcgaattcc  
>CD\_NM\_000206.1:627  
CgCctGcgagtctGGtatGAACATAAGTTCTCCTTGCCTAGTTCAAGAGACTAGGCAAGGAGAACTTATGTCTTTTTTgct  
cgagctggcgaattcc  
>CD\_NM\_000206.1:481  
CgCctGcgagtctGGtatGCCAGAGAACCTAACACTTCACTTCAAGAGAGTGAAGTGTTAGGTTCTCTGGATTTTTTgct  
cgagctggcgaattcc  
>CD\_NM\_000206.1:844  
CgCctGcgagtctGGtatGATGTGTGTATTTCTGGCTGGAATTCAGAGATTCAGCCAGAAATACACACAGTTTTTTGct  
cgagctggcgaattcc  
>CD\_NM\_000206.1:292  
CgCctGcgagtctGGtatGATCGGATAATGATAAAGTCCAGTTCAAGAGACTGGACTTTATCATTATCCGAGTTTTTTGct  
cgagctggcgaattcc  
>CD\_NM\_000206.1:522  
CgCctGcgagtctGGtatGCAGAACTGAACTGGAACAACAGTTCAAGAGACTGTTGTTCCAGTTCAGTTCATTTTTTgct  
cgagctggcgaattcc  
>CD\_NM\_000206.1:579  
CgCctGcgagtctGGtatGCCCGGACTGACTGGGACCACAGTTCAAGAGACTGTGGTCCCAGTCAGTCCGGTTTTTTTgct  
cgagctggcgaattcc  
>CD\_NM\_000206.1:990  
CgCctGcgagtctGGtatGATGAACGACTCTGCCTCGTCAGTTCAAGAGACTGACGAGGCAGAGTCGTTCACTTTTTTgct  
cgagctggcgaattcc  
>CD\_NM\_000206.1:323  
CgCctGcgagtctGGtatGAACTATCTATTCTCTGAAGAAATTCAGAGATTTCTTCAGAGAATAGATAGTTTTTTGct  
cgagctggcgaattcc  
>CD\_NM\_000206.1:271

CgCctGcgagtctGGtatGCCTGCATTATTGGTACAAGAACTTCAAGAGAGTTCTTGTACCAATAATGCAGATTTTTTGct  
cgagctggcgaattcc  
>CD\_NM\_000206.1:613  
CgCctGcgagtctGGtatGCTCAGTGGATTATAGACATAAGTTCAAGAGACTTATGTCTATAATCCACTGATTTTTTGct  
cgagctggcgaattcc  
>CD\_NM\_000206.1:155  
CgCctGcgagtctGGtatGAACTCCCTCAGTGTTCCTCAAGAGAGAGTGGAAACACTGAGGGAGTCTTTTTTGct  
cgagctggcgaattcc  
>CD\_NM\_000206.1:317  
CgCctGcgagtctGGtatGCGCAGCCACTATCTATTCTCTGTTCAAGAGACAGAGAATAGATAGTGGCTGCATTTTTTGct  
cgagctggcgaattcc  
>CD\_NM\_000206.1:886  
CgCctGcgagtctGGtatGAACCCTGAAGAACCTAGAGGATTTCAAGAGAATCCTCTAGGTTCTCAGGGTGTTTTTTGct  
cgagctggcgaattcc  
>CD\_NM\_000206.1:1103  
CgCctGcgagtctGGtatGCCCTAAAGCCTGAAACCTGAATTCAAGAGATTCAGGTTTCAGGCTTTAGGGTTTTTTTGct  
cgagctggcgaattcc  
>CD\_NM\_000206.1:216  
CgCctGcgagtctGGtatGCGTACATGAATTGCACTTGAATTCAAGAGATTCGAAGTGAATTCATGTACTTTTTTGct  
cgagctggcgaattcc  
>CD\_NM\_006017:1257  
CgCctGcgagtctGGtatGAAGCATTCTCTGTTTATGTTAATTCAAGAGATTAACATAAACAGAGAATGCTGTTTTTGct  
cgagctggcgaattcc  
>CD\_NM\_006017:1114  
CgCctGcgagtctGGtatGAGGCTATCAATCCCTTAATGATTTCAAGAGAATCATTAAAGGGATTGATAGCCCTTTTTTGct  
cgagctggcgaattcc  
>CD\_NM\_006017:607  
CgCctGcgagtctGGtatGCCGAAACTGGCAGATAGCAATTTCAAGAGAATTGCTATCTGCCAGTTCCGATTTTTTGct  
cgagctggcgaattcc  
>CD\_NM\_006017:330  
CgCctGcgagtctGGtatGCAGGTCTAAAGATTGTCTACTATTCAAGAGATAGTAGACAATCTTTAGACCTATTTTTTGct  
cgagctggcgaattcc  
>CD\_NM\_006017:2085  
CgCctGcgagtctGGtatGCACGAGTCCCTTCTATAGAACATTCGAAGAGATGTTCTATAGGAAGGACTCGTTTTTTTGct  
cgagctggcgaattcc  
>CD\_NM\_006017:518  
CgCctGcgagtctGGtatGCCCTGTTGGTGATTTGTATAAATTCAAGAGATTATACAAATCACCAACAGGGATTTTTTGct  
cgagctggcgaattcc  
>CD\_NM\_006017.1:2202  
CgCctGcgagtctGGtatGCGCTCAGAACTTCATCACAACTTCAAGAGAGTTTGTGATGAAGTTCTGAGCATTTTTTGct  
cgagctggcgaattcc  
>CD\_NM\_006017.1:310  
CgCctGcgagtctGGtatGCAGCCAGAACTGTAATCTTAGTTCAAGAGACTAAGATTACAGTTTCTGGCTTTTTTTTGct  
cgagctggcgaattcc  
>CD\_NM\_006017.1:797  
CgCctGcgagtctGGtatGCTGAGATTAAGTCCATGGCAACTTCAAGAGAGTTGCCATGGACTTAATCTCATTTTTTGct  
cgagctggcgaattcc  
>CD\_NM\_006017.1:1779  
CgCctGcgagtctGGtatGAAGTGAACATCTCAACATTAATTTCAAGAGAATTAATGTTGAGATGTTCACTGTTTTTTGct  
cgagctggcgaattcc  
>CD\_NM\_006017.1:494  
CgCctGcgagtctGGtatGCCCTGAGGAAATGCTTTGCAATTTCAAGAGAATTGCAAAGCATTTCCTCAGGATTTTTTGct  
cgagctggcgaattcc  
>CD\_NM\_006017.1:660



CgCtGcgagtctGGtatGCCAGAGCAAATCAAATATATATTCAAGAGATATATATTTGATTTGCTCTGGATTTTTGct  
cgagctggcgaattcc  
>CD\_NM\_006017.1:2375  
CgCtGcgagtctGGtatGCTGTCTTTCTGTGTAGCTACATTTCAAGAGAATGTAGCTACACAGAAAGACATTTTTGct  
cgagctggcgaattcc  
>CD\_NM\_006017.1:2224  
CgCtGcgagtctGGtatGCATACTTCTCTGTTATTATTGTTCAAGAGACAATAATAACAGAGGAAGTATTTTTGct  
cgagctggcgaattcc  
>CD\_NM\_006017.1:516  
CgCtGcgagtctGGtatGATCCCTGTTGGTGATTTGTATATTCAAGAGATATACAAATCACCAACAGGGAGTTTTGct  
cgagctggcgaattcc  
>CD\_NM\_006017.1:1257  
CgCtGcgagtctGGtatGCGCATTCTCTGTTTATGTTAATTTCAAGAGAATTAACATAAACAGAGAATGCTTTTTGct  
cgagctggcgaattcc  
>CD\_NM\_006017.1:207  
CgCtGcgagtctGGtatGCCTAGTGCATATCTTTCTCTATTTCAAGAGAATAGAGAAAGATATGCACTAGTTTTGct  
cgagctggcgaattcc  
>CD\_NM\_006017.1:649  
CgCtGcgagtctGGtatGCTGAATGAACTCCAGAGCAAATTTCAAGAGATTTGCTCTGGAGTTTCATTCAATTTTTGct  
cgagctggcgaattcc  
>CD\_NM\_006017.1:1833  
CgCtGcgagtctGGtatGCAGTCTGAAGGTAATCTTAATTTCAAGAGAATTAAGATTTACCTTCAGACTTTTTGct  
cgagctggcgaattcc  
>CD\_NM\_006017.1:1122  
CgCtGcgagtctGGtatGCTCCCTAATGATATACCTGACTTCAAGAGAGTCAGGTATATCATTAAGGGATTTTTGct  
cgagctggcgaattcc  
>CD\_NM\_006017.1:1662  
CgCtGcgagtctGGtatGATCTGGGAAGCTATTTAATAAATTTCAAGAGATTTATTAATAGCTTCCAGAGTTTTGct  
cgagctggcgaattcc  
>CD\_NM\_006017.1:2226  
CgCtGcgagtctGGtatGCACTTCTCTGTTATTATTGAGTTCAAGAGACTCAATAATAACAGAGGAAGTATTTTTGct  
cgagctggcgaattcc  
>CD\_NM\_006017.1:1827  
CgCtGcgagtctGGtatGCTTGAAAGTCTGAAGGTAATTTCAAGAGAATTTACCTTCAGACTTTCCAATTTTTGct  
cgagctggcgaattcc  
>CD\_NM\_006017.1:638  
CgCtGcgagtctGGtatGCGCGAACTCTCTTGAATGAACTTTCAAGAGAGTTTCATTCAAGAGAGTTCGCATTTTTGct  
cgagctggcgaattcc  
>CD\_NM\_006017.1:1911  
CgCtGcgagtctGGtatGCATAGACAGAAATGAATTATGACTTCAAGAGAGTCATAATTCATTCTGTCTATTTTTGct  
cgagctggcgaattcc  
>CD\_NM\_006017.1:1654  
CgCtGcgagtctGGtatGCACTATCTCTCTGGGAAGCTATTTCAAGAGAATAGCTTCCAGAGAGATAGTATTTTTGct  
cgagctggcgaattcc  
>CD\_NM\_006017.1:1224  
CgCtGcgagtctGGtatGCACTCAGCGTCTTCTTATTCAAGAGACTGAATAGGAAGACGCTGAGTTTTTTGct  
cgagctggcgaattcc  
>CD\_NM\_006017.1:784  
CgCtGcgagtctGGtatGCTCCCTGTTCTTGATGAGATTATTCAAGAGATAATCTCATCAAGAACAGGGATTTTTGct  
cgagctggcgaattcc  
>CD\_NM\_006017.1:109  
CgCtGcgagtctGGtatGCCACAGATGCTCCTAAGGCTTTTTCAAGAGAAAGCCTTAGGAGCATCTGTGGATTTTTGct  
cgagctggcgaattcc  
>CD\_NM\_006017.1:1114

CgCctGcgagtctGGtatGAGCTATCAATCCCTTAATGATATTCAAGAGATATCATTAAAGGGATTGATAGCCTTTTTTGct  
cgagctggcgaattcc  
>CD\_NM\_006017.1:2518  
CgCctGcgagtctGGtatGCACGATGATGTTGAAACTATACTTCAAGAGAGTATAGTTTCAACATCATCGTATTTTTTGct  
cgagctggcgaattcc  
>CD\_NM\_006017.1:2505  
CgCctGcgagtctGGtatGCTCGGAGGACGTGTACGATGATTTCAAGAGAATCATCGTACACGTCTCCGAATTTTTTGct  
cgagctggcgaattcc  
>CD\_NM\_006017.1:1619  
CgCctGcgagtctGGtatGCGGATACACCCTACTTACTAAATTCAAGAGATTTAGTAAGTAGGGTGTATCCATTTTTTGct  
cgagctggcgaattcc  
>CD\_NM\_003327:165  
CgCctGcgagtctGGtatGCGCCGCTGCAGCCGCTCCCAGATTCAAGAGATCTGGGAGCGGCTGCAGCGGCTTTTTTGct  
cgagctggcgaattcc  
>CD\_NM\_003327:254  
CgCctGcgagtctGGtatGATGCACGTGGTGTAACTCAGATTCAAGAGATCTGAGGTTACACCACGTGCAGTTTTTGct  
cgagctggcgaattcc  
>CD\_NM\_003327:420  
CgCctGcgagtctGGtatGAAGGCCTGCAAGCCCTGGACCATTCAAGAGATGGTCCAGGGCTTGCAGGCCTTTTTTGct  
cgagctggcgaattcc  
>CD\_NM\_003327:476  
CgCctGcgagtctGGtatGAGCCAGCAATAGCTCGGACGCATTCAAGAGATGCGTCCGAGCTATTGCTGGCCTTTTTTGct  
cgagctggcgaattcc  
>CD\_NM\_003327:575  
CgCctGcgagtctGGtatGACCCACTGAAGCCTGGCCAGATTCAAGAGATCTGGGCCAGGCTTCAGTGGGCCTTTTTTGct  
cgagctggcgaattcc  
>CD\_NM\_003327:810  
CgCctGcgagtctGGtatGAACGCCCACTCCACCCTGGCCATTCAAGAGATGGCCAGGGTGGAGTGGGCGTCTTTTTTGct  
cgagctggcgaattcc  
>CD\_NM\_003327.2:489  
CgCctGcgagtctGGtatGAGGACGCAATCTGTGAGGACAGTTCAAGAGACTGTCCTCACAGATTGCGTCCGTTTTTGct  
cgagctggcgaattcc  
>CD\_NM\_003327.2:811  
CgCctGcgagtctGGtatGAGCCCACTCCACCCTGGCCAAGTTCAAGAGACTTGGCCAGGGTGGAGTGGGCGTTTTTGct  
cgagctggcgaattcc  
>CD\_NM\_003327.2:563  
CgCctGcgagtctGGtatGCTCACTGTCCAGCCCACTGAAGTTCAAGAGACTTTCAGTGGGCTGGACAGTGATTTTTTGct  
cgagctggcgaattcc  
>CD\_NM\_003327.2:40  
CgCctGcgagtctGGtatGATGTGCGGCTCTGCTCCTCTGTTCAAGAGACAGGAGGAGCAGAGCCGCACACTTTTTTGct  
cgagctggcgaattcc  
>CD\_NM\_003327.2:420  
CgCctGcgagtctGGtatGCGGCCTGCAAGCCCTGGACCAATTCAAGAGATTTGGTCCAGGGCTTGCAGGCCTTTTTTGct  
cgagctggcgaattcc  
>CD\_NM\_003327.2:252  
CgCctGcgagtctGGtatGACTGCACGTGGTGTAACTCAGTTCAAGAGACTGAGGTTACACCACGTGCAGTTTTTGct  
cgagctggcgaattcc  
>CD\_NM\_003327.2:168  
CgCctGcgagtctGGtatGACTGCAGCCGCTCCCAGAACACTTCAAGAGAGTGTCTGGGAGCGGCTGCAGTTTTTGct  
cgagctggcgaattcc  
>CD\_NM\_003327.2:225  
CgCctGcgagtctGGtatGCCGTGGTCAGTCCAAGCCGTGTTCAAGAGACACGGCTTGGAGCTGACCACGTTTTTGct  
cgagctggcgaattcc  
>CD\_NM\_003327.2:573

CgCtGcgagtctGGtatGCGCCACTGAAGCCTGGCCAGTTCAAGAGACTGGGCCAGGCTTCAGTGGGCTTTTTTGct  
cgagctggcgaattcc  
>CD\_NM\_003327.2:353  
CgCtGcgagtctGGtatGAACAGCTACAAGCCTGGAGTTGTTCAAGAGACAACCTCCAGGCTTGTAGCTGTCTTTTTGct  
cgagctggcgaattcc  
>CD\_NM\_003327.2:46  
CgCtGcgagtctGGtatGAGCTCTGCTCCTCCTGGCCCTGTTCAAGAGACAGGCCAGGAGGAGCAGAGCCTTTTTGct  
cgagctggcgaattcc  
>CD\_NM\_003327.2:409  
CgCtGcgagtctGGtatGCGGCGACAACCAGGCCTGCAAGTTCAAGAGACTTGCAGGCCTGGTTGTCGCCTTTTTGct  
cgagctggcgaattcc  
>CD\_NM\_003327.2:487  
CgCtGcgagtctGGtatGATCGGACGCAATCTGTGAGGACTTCAAGAGAGTCCTCACAGATTGCGTCCGAGTTTTGct  
cgagctggcgaattcc  
>CD\_NM\_003327.2:493  
CgCtGcgagtctGGtatGAGCAATCTGTGAGGACAGGGACTTCAAGAGAGTCCCTGTCTCACAGATTGCGTTTTGct  
cgagctggcgaattcc  
>CD\_NM\_003327.2:202  
CgCtGcgagtctGGtatGATGCGGGCCGGCTTCTACAACCTCAAGAGAGTTGTAGAAGCCCGGCCGACTTTTTGct  
cgagctggcgaattcc  
>CD\_NM\_003327.2:816  
CgCtGcgagtctGGtatGCCTCCACCCTGGCCAAGATCTGTTCAAGAGACAGATCTTGCCAGGGTGGAGTTTTGct  
cgagctggcgaattcc  
>CD\_NM\_003327.2:254  
CgCtGcgagtctGGtatGCGCACGTGGTGTAACCTCAGAATTCAGAGATTCTGAGGTTACACCACGTGCATTTTTGct  
cgagctggcgaattcc  
>CD\_NM\_003327.2:709  
CgCtGcgagtctGGtatGAGCCCTGTACCTGCTCCGGAGGTTCAAGAGACCTCCGGAGCAGGTACAGGGCCTTTTTGct  
cgagctggcgaattcc  
>CD\_NM\_003327.2:550  
CgCtGcgagtctGGtatGACCGGCCAGGCCATCACTGTCTTCAAGAGAGACAGTGATGGCCCTGGCCGGTTTTGct  
cgagctggcgaattcc  
>CD\_NM\_003327.2:274  
CgCtGcgagtctGGtatGCAGTGGGAGTGAGCGGAAGCAGTTCAAGAGACTGCTTCCGCTCACTCCCCTTTTTGct  
cgagctggcgaattcc  
>CD\_NM\_003327.2:240  
CgCtGcgagtctGGtatGCGCCGTGCAAGCCCTGCACGTGTTCAAGAGACACGTGCAGGGCTTGCACGGTTTTGct  
cgagctggcgaattcc  
>CD\_NM\_003327.2:588  
CgCtGcgagtctGGtatGAGCCCAGAACCCTCACAGGGACCTTCAAGAGAGGTCCCTGTGAGGTTCTGGGCCTTTTTGct  
cgagctggcgaattcc  
>CD\_NM\_003327.2:144  
CgCtGcgagtctGGtatGAGCCAGGCAACGGGATGGTGAGTTCAAGAGACTCACCATCCCGTTGCCTGGCCTTTTTGct  
cgagctggcgaattcc  
>CD\_NM\_003327.2:697  
CgCtGcgagtctGGtatGAGCCATCCTGCTGGCCCTGTACTTCAAGAGAGTACAGGGCCAGCAGGATGGCCTTTTTGct  
cgagctggcgaattcc  
>CD\_NM\_003327.2:575  
CgCtGcgagtctGGtatGACCACTGAAGCCTGGCCAGAAATTCAGAGATTCTGGCCAGGCTTCAGTGGTTTTGct  
cgagctggcgaattcc  
>CD\_NM\_003327.2:120  
CgCtGcgagtctGGtatGCCGACCGGTGCTGCCACGAGTGTTCAAGAGACACTCGTGGCAGCACCGGTCGTTTTGct  
cgagctggcgaattcc  
>CD\_NM\_003327.2:465

CgCctGcgagtctGGtatGACCTGCAGCCGGCCAGCAATAGTTCAAGAGACTATTGCTGGCCGGCTGCAGGGTTTTTGct  
cgagctggcgaattcc  
>CD\_NM\_004119:425  
CgCctGcgagtctGGtatGAAGGAGTTGTTCCATGGTCATTTCAAGAGAATGACCATGGAAACAACCTCTTTTTTGct  
cgagctggcgaattcc  
>CD\_NM\_004119:784  
CgCctGcgagtctGGtatGCGGCTGTTCAACAATAGATCTAATTTCAAGAGATTAGATCTATTGTGAACAGCCTTTTTTGct  
cgagctggcgaattcc  
>CD\_NM\_004119:1285  
CgCctGcgagtctGGtatGCAGCACCAGCCAGGAGAATATATTTCAAGAGATATATTCTCTGGCTGGTGCTTTTTTTGct  
cgagctggcgaattcc  
>CD\_NM\_004119:1585  
CgCctGcgagtctGGtatGCTCCTGGTCAAGTGCTGTGCATTTCAAGAGAATGCACAGCACTTGACCAGGAATTTTTGct  
cgagctggcgaattcc  
>CD\_NM\_004119:1795  
CgCctGcgagtctGGtatGAAGGTGACCGCTCCTCAGATATTTCAAGAGATATCTGAGGAGCCGGTCACCTGTTTTTGct  
cgagctggcgaattcc  
>CD\_NM\_004119:2056  
CgCctGcgagtctGGtatGAAGCTGGGAAGCCACGAGAATATTTCAAGAGATATTTCTCGTGGCTTCCCAGCTGTTTTTGct  
cgagctggcgaattcc  
>CD\_NM\_004119.1:2702  
CgCctGcgagtctGGtatGATCACTTGGTGTGAATCCTTACTTTCAAGAGAGTAAGGATTCACACCAAGTGAGTTTTTGct  
cgagctggcgaattcc  
>CD\_NM\_004119.1:1836  
CgCctGcgagtctGGtatGCTCAGAGAATATGAATATGATCTTTCAAGAGAGATCATATTCATATTCTCTGAATTTTTTGct  
cgagctggcgaattcc  
>CD\_NM\_004119.1:2337  
CgCctGcgagtctGGtatGAACTCTGAAGATGAAATTGAATTTCAAGAGAATTCAATTTTCATCTTCAGAGTGTTTTTGct  
cgagctggcgaattcc  
>CD\_NM\_004119.1:2667  
CgCctGcgagtctGGtatGATCTGGTCATATGGAATATTACTTTCAAGAGAGTAATATTCCATATGACCAGACTTTTTGct  
cgagctggcgaattcc  
>CD\_NM\_004119.1:1680  
CgCctGcgagtctGGtatGCTCTCATTCTATGCAACAATTGTTCAAGAGACAATTGTTGCATAGAATGAGATTTTTTGct  
cgagctggcgaattcc  
>CD\_NM\_004119.1:1795  
CgCctGcgagtctGGtatGCGGTGACCGCTCCTCAGATAATTTCAAGAGATTATCTGAGGAGCCGGTCACCTTTTTTGct  
cgagctggcgaattcc  
>CD\_NM\_004119.1:736  
CgCctGcgagtctGGtatGAGGACATAAGGTGCTGTGCCAGTTCAAGAGACTGGCACAGCACCTTATGTCCGTTTTTGct  
cgagctggcgaattcc  
>CD\_NM\_004119.1:1700  
CgCctGcgagtctGGtatGCGGTGTTTGTCTCCTCTTCATTTTTCAAGAGAAATGAAGAGGAGACAAACACCATTTTTGct  
cgagctggcgaattcc  
>CD\_NM\_004119.1:323  
CgCctGcgagtctGGtatGAACTGCAAGTGCTGGTCGATTTCAAGAGAATCGACCAGCACTTGACAGTGTTTTTGct  
cgagctggcgaattcc  
>CD\_NM\_004119.1:2018  
CgCctGcgagtctGGtatGCAGAGAGGCACTCATGTCAGAATTTCAAGAGATTCTGACATGAGTGCCCTCTTTTTTGct  
cgagctggcgaattcc  
>CD\_NM\_004119.1:1534  
CgCctGcgagtctGGtatGAACAGTGGGTGTCGAGCAGTACTTTCAAGAGAGTACTGCTCGACACCCACTGTCTTTTTGct  
cgagctggcgaattcc  
>CD\_NM\_004119.1:1808

CgCctGcgagtctGGtatGATCAGATAATGAGTACTTCTACTTCAAGAGAGTAGAAGTACTCATTATCTGAGTTTTTgct  
cgagctggcgaattcc  
>CD\_NM\_004119.1:1113  
CgCctGcgagtctGGtatGCCCAATTCAAGTGAAGATTATGTTCAAGAGACATAATCTTCACTTGAATTGGTTTTTgct  
cgagctggcgaattcc  
>CD\_NM\_004119.1:1492  
CgCctGcgagtctGGtatGAAGAAGGAGTCTGGAATAGAAATTC AAGAGATTTCTATTCCAGACTCCTTCTGTTTTTgct  
cgagctggcgaattcc  
>CD\_NM\_004119.1:362  
CgCctGcgagtctGGtatGATGTCTCTGGGTCTTTAAGCACTTCAAGAGAGTGCTTAAAGACCCAGAGACAGTTTTTgct  
cgagctggcgaattcc  
>CD\_NM\_004119.1:789  
CgCctGcgagtctGGtatGCTCACAATAGATCTAAATCAAATTC AAGAGATTTGATTTAGATCTATTGTGAATTTTTgct  
cgagctggcgaattcc  
>CD\_NM\_004119.1:358  
CgCctGcgagtctGGtatGCTTCTGTCTCTGGGTCTTTAATTCAAGAGATTAAAGACCCAGAGACAGGAAATTTTTgct  
cgagctggcgaattcc  
>CD\_NM\_004119.1:1076  
CgCctGcgagtctGGtatGCTTGGTTACCATCGTAGGAAAGTTCAAGAGACTTTCCTACGATGGTAACCAAATTTTTgct  
cgagctggcgaattcc  
>CD\_NM\_004119.1:1062  
CgCctGcgagtctGGtatGACCAGTCAATCAGCTTTGGTTATTCAAGAGATAACCAAAGCTGATTGACTGGTTTTTgct  
cgagctggcgaattcc  
>CD\_NM\_004119.1:1087  
CgCctGcgagtctGGtatGCCGTAGGAAAGGGATTTATAAATTC AAGAGATTTATAAATCCCTTTCCTACGATTTTTTgct  
cgagctggcgaattcc  
>CD\_NM\_004119.1:364  
CgCctGcgagtctGGtatGATCTCTGGGTCTTTAAGCACAGTTCAAGAGACTGTGCTTAAAGACCCAGAGACTTTTTTgct  
cgagctggcgaattcc  
>CD\_NM\_004119.1:2133  
CgCctGcgagtctGGtatGCACTGTTGCTATGGTGATCTTCTTCAAGAGAGAAGATCACCATAGCAACAGTATTTTTTgct  
cgagctggcgaattcc  
>CD\_NM\_004119.1:2450  
CgCctGcgagtctGGtatGCATGGAATTTCTGGAATTTAAGTTCAAGAGACTTAAATTCAGAAATTCATTTTTTgct  
cgagctggcgaattcc  
>CD\_NM\_004119.1:2095  
CgCctGcgagtctGGtatGAGTGCACACTGTCAGGACCAATTTCAAGAGAATTGGTCCTGACAGTGTGCACGTTTTTgct  
cgagctggcgaattcc  
>CD\_NM\_004119.1:1937  
CgCctGcgagtctGGtatGCACAGCTTATGGAATTAGCAAATTC AAGAGATTTGCTAATTCATAAGCTGTTTTTTTgct  
cgagctggcgaattcc  
>CD\_NM\_004119.1:544  
CgCctGcgagtctGGtatGACCTGCTTTACACATTAAGAAGTTCAAGAGACTTCTTAATGTGTAAAGCAGGGTTTTTgct  
cgagctggcgaattcc  
>CD\_NM\_004119.1:1163  
CgCctGcgagtctGGtatGCTCTGTCAGGTTTAAAGCCTACTTCAAGAGAGTAGGCTTTAAACCTGACAGAATTTTTTgct  
cgagctggcgaattcc  
>CD\_NM\_002447:746  
CgCctGcgagtctGGtatGCAGCATCTTGTCTCCTACAGTATTCAAGAGATACTGTAGGAGACAAGATGCTTTTTTgct  
cgagctggcgaattcc  
>CD\_NM\_002447:1045  
CgCctGcgagtctGGtatGAGCCGAGGGCCAGGAAGTACTATTCAAGAGATAGTACTTCTGGCCCTCGGCGTTTTTgct  
cgagctggcgaattcc  
>CD\_NM\_002447:1448

CgCctGcgagtctGGtatGATGGAGCTGGTCAGGTCACCTAATTCAAGAGATTAGTGACCTGACCAGCTCCACTTTTTTGct  
cgagctggcgaattcc  
>CD\_NM\_002447:2492  
CgCctGcgagtctGGtatGAAGCTGTGCCGCTTTCCTGAATTTCAAGAGAATTCAGGAAGGCGGCACAGCTGTTTTTGct  
cgagctggcgaattcc  
>CD\_NM\_002447:2827  
CgCctGcgagtctGGtatGATGCGTAGATGGTGAATGTCATTTCAAGAGAATGACATTCACCATCTACGCAGTTTTTGct  
cgagctggcgaattcc  
>CD\_NM\_002447:3799  
CgCctGcgagtctGGtatGAAGCCTGCAGACCTATAGATTTTTCAAGAGAAAATCTATAGGTCTGCAGGCTTTTTTGct  
cgagctggcgaattcc  
>CD\_NM\_002447.1:746  
CgCctGcgagtctGGtatGCGCATCTTGTCTCCTACAGTATTTCAAGAGAATACTGTAGGAGACAAGATGCTTTTTTGct  
cgagctggcgaattcc  
>CD\_NM\_002447.1:3276  
CgCctGcgagtctGGtatGAAGTGACCGAGTCATTGGCAAATTCAGAGATTTGCCAATGACTCGGTCACTTTTTTGct  
cgagctggcgaattcc  
>CD\_NM\_002447.1:2697  
CgCctGcgagtctGGtatGAGCTGACTGTGTGGGTATCAACTTCAAGAGAGTTGATACCCACACAGTCAGCTTTTTGct  
cgagctggcgaattcc  
>CD\_NM\_002447.1:3145  
CgCctGcgagtctGGtatGCTCTCCGATAGTGAAGATGAATTTCAAGAGAATTCATCTTCACTATCGGAGAATTTTTTGct  
cgagctggcgaattcc  
>CD\_NM\_002447.1:2660  
CgCctGcgagtctGGtatGCTGCCATTAAGTTTGTAGTATATTTCAAGAGAATATACTCAAACCTAATGGCATTTTTTGct  
cgagctggcgaattcc  
>CD\_NM\_002447.1:2505  
CgCctGcgagtctGGtatGCCCTGAATATGTGGTCCGAGACTTCAAGAGAGTCTCGGACCACATATTCAGGATTTTTTGct  
cgagctggcgaattcc  
>CD\_NM\_002447.1:3168  
CgCctGcgagtctGGtatGATGTGTGCCACTGCTGCGGAAATTCAGAGATTTCCGCAGCAGTGGCACACAGTTTTTGct  
cgagctggcgaattcc  
>CD\_NM\_002447.1:3961  
CgCctGcgagtctGGtatGCGCCCTGATTCTCTGTACCAAGTTCAAGAGACTTGGTACAGAGAATCAGGGCATTTTTTGct  
cgagctggcgaattcc  
>CD\_NM\_002447.1:2166  
CgCctGcgagtctGGtatGAAGCCGGGCTGTGCTGGTCAATTTCAAGAGAATGACCAGCACAGCCCGGCTTTTTTGct  
cgagctggcgaattcc  
>CD\_NM\_002447.1:2051  
CgCctGcgagtctGGtatGCGCTGAGAGGCTTCTCTTTCATTTCAAGAGAATGAAAGAGAAGCCTCTCAGCATTTTTTGct  
cgagctggcgaattcc  
>CD\_NM\_002447.1:3453  
CgCctGcgagtctGGtatGCGTGCTGGCTCTCATTGGTATCTTCAAGAGAGATACCAATGAGAGCCAGCACATTTTTTGct  
cgagctggcgaattcc  
>CD\_NM\_002447.1:2144  
CgCctGcgagtctGGtatGACCAGAGTCTGTCTGTAGGCACTTCAAGAGAGTGCCTACAGACAGACTCTGGCTTTTTTGct  
cgagctggcgaattcc  
>CD\_NM\_002447.1:3963  
CgCctGcgagtctGGtatGACCTGATTCTCTGTACCAAGTGTTCAGAGACACTTGGTACAGAGAATCAGGGTTTTTGct  
cgagctggcgaattcc  
>CD\_NM\_002447.1:1150  
CgCctGcgagtctGGtatGAACACACTAATTGATGAGGGTGTTCAGAGACACCCTCATCAATTAGTGTCTTTTTTGct  
cgagctggcgaattcc  
>CD\_NM\_002447.1:3367

CgCctGcgagtctGGtatGCAGTCACTAAGTCGCATCACAGTTCAAGAGACTGTGATGCGACTTAGTGACTTTTTTTGct  
cgagctggcgaattcc  
>CD\_NM\_002447.1:579  
CgCctGcgagtctGGtatGACGTGTAAGTGTGGTTGAGCAATTCAAGAGATTGCTCAACCACAGTTACACGGTTTTTTGct  
cgagctggcgaattcc  
>CD\_NM\_002447.1:3061  
CgCctGcgagtctGGtatGCACTCGGGCTCTGACTACAGAATTCAAGAGATTCTGTAGTCAGAGCCCAGTATTTTTGct  
cgagctggcgaattcc  
>CD\_NM\_002447.1:726  
CgCctGcgagtctGGtatGAGCGTTGTCAGTGTGCCAAGTTCAAGAGACTTGGGCAGCACTGACAACGCCTTTTTGct  
cgagctggcgaattcc  
>CD\_NM\_002447.1:2366  
CgCctGcgagtctGGtatGACTACATCAACTCCCACATCACTTCAAGAGAGTGATGTGGGAGTTGATGTAGCTTTTTGct  
cgagctggcgaattcc  
>CD\_NM\_002447.1:741  
CgCctGcgagtctGGtatGACCCAAGCATCTTGTCTCCTACTTCAAGAGAGTAGGAGACAAGATGCTTGGCCTTTTTGct  
cgagctggcgaattcc  
>CD\_NM\_002447.1:2415  
CgCctGcgagtctGGtatGCTGGCACTTAGTGCTGTCATTCTTCAAGAGAGAATGACAGCACTAAGTGCCATTTTTGct  
cgagctggcgaattcc  
>CD\_NM\_002447.1:229  
CgCctGcgagtctGGtatGCGTGCTGTGTTTGTAGCCATACTTCAAGAGAGTATGGCTACAAACACAGCACTTTTTGct  
cgagctggcgaattcc  
>CD\_NM\_002447.1:1367  
CgCctGcgagtctGGtatGCGGTCACTGCATTGTATGTGACTTCAAGAGAGTCACATACAATGCAGTGACCTTTTTGct  
cgagctggcgaattcc  
>CD\_NM\_002447.1:1790  
CgCctGcgagtctGGtatGACCTGTGTGGCTCCAATTCTATTCAAGAGATAGAAGTTGGAGCCACACAGGGTTTTGct  
cgagctggcgaattcc  
>CD\_NM\_002447.1:2127  
CgCctGcgagtctGGtatGATGTCTCACTCTTGAAGGCCAGTTCAAGAGACTGGCCTTCAAGAGTGAGACAGTTTTGct  
cgagctggcgaattcc  
>CD\_NM\_002447.1:1448  
CgCctGcgagtctGGtatGCGGAGCTGGTCAGGTCATAAATTCAAGAGATTTAGTGACCTGACCAGCTCCATTTTTGct  
cgagctggcgaattcc  
>CD\_NM\_002447.1:3792  
CgCctGcgagtctGGtatGACTGGAGAGCCTGCAGACCTATTTCAAGAGAATAGGTCTGCAGGCTCTCCAGCTTTTTGct  
cgagctggcgaattcc  
>CD\_NM\_001561:223  
CgCctGcgagtctGGtatGAAGCTGGTACATTCTGTGATAAATTCAAGAGATTATCACAGAATGTACCAGCTGTTTTGct  
cgagctggcgaattcc  
>CD\_NM\_001561:354  
CgCctGcgagtctGGtatGCAGGAGTGTTCCTCCACCAGCATTCAAGAGATGCTGGTGGAGGAACACTCCTTTTTGct  
cgagctggcgaattcc  
>CD\_NM\_001561:747  
CgCctGcgagtctGGtatGCCGCTCCGTTTCTCTGTTGTTATTCAAGAGATAACAACAGAGAAACGGAGCGTTTTGct  
cgagctggcgaattcc  
>CD\_NM\_001561:773  
CgCctGcgagtctGGtatGAGGCAGAAAGAACTCCTGTATTTCAAGAGAATACAGGAGTTTCTTTCTGCCTTTTGct  
cgagctggcgaattcc  
>CD\_NM\_001561.4:749  
CgCctGcgagtctGGtatGATCCGTTTCTCTGTTGTTAACTTCAAGAGAGTTTAAACAACAGAGAAACGGAGTTTTGct  
cgagctggcgaattcc  
>CD\_NM\_001561.4:553

CgCctGcgagtctGGtatGCGGAAAGTCTGTGCTTGTGAATTTCAAGAGAATTCACAAGCACAGACTTCCATTTTTGct  
cgagctggcgaattcc  
>CD\_NM\_001561.4:428  
CgCctGcgagtctGGtatGCTGTGTGAACAGGATTGTAACTTCAAGAGAGTTTACAATCCTGTTACACATTTTTGct  
cgagctggcgaattcc  
>CD\_NM\_001561.4:775  
CgCctGcgagtctGGtatGAAGAAAGAACTCCTGTATATATTCAAGAGATATATACAGGAGTTTCTTTCTGTTTTGct  
cgagctggcgaattcc  
>CD\_NM\_001561.4:260  
CgCctGcgagtctGGtatGCGCAGTCCCTGTCCTCCAAATATTCAAGAGATATTTGGAGGACAGGGACTGCATTTTTGct  
cgagctggcgaattcc  
>CD\_NM\_001561.4:851  
CgCctGcgagtctGGtatGCGCTGCCGATTTCCAGAAGAAGTTCAAGAGACTTCTTCTGGAAATCGGCAGCTTTTTGct  
cgagctggcgaattcc  
>CD\_NM\_001561.4:747  
CgCctGcgagtctGGtatGAGCTCCGTTTCTCTGTTGTTAATTCAAGAGATTAACAACAGAGAAACGGAGCGTTTTGct  
cgagctggcgaattcc  
>CD\_NM\_001561.4:157  
CgCctGcgagtctGGtatGAACTCTGTTGCTGGTCCCTCAACTTCAAGAGAGTTGAGGACCAGCAACAGAGTGTTTTTGct  
cgagctggcgaattcc  
>CD\_NM\_001561.4:494  
CgCctGcgagtctGGtatGAGGACATTTAACGATCAGAACTTCAAGAGAGTTTCTGATCGTTAAATGTCCTTTTGct  
cgagctggcgaattcc  
>CD\_NM\_001561.4:225  
CgCctGcgagtctGGtatGATGGTACATTCCTGTGATAATAATTCAAGAGATTATTATCACAGAATGTACCAGTTTTGct  
cgagctggcgaattcc  
>CD\_NM\_001561.4:223  
CgCctGcgagtctGGtatGCGCTGGTACATTCCTGTGATAATTTCAAGAGAATTATCACAGAATGTACCAGTTTTGct  
cgagctggcgaattcc  
>CD\_NM\_001561.4:227  
CgCctGcgagtctGGtatGAGTACATTCCTGTGATAATAACATTTCAAGAGATGTTATTATCACAGAATGTACTTTTGct  
cgagctggcgaattcc  
>CD\_NM\_001561.4:681  
CgCctGcgagtctGGtatGAGCAGATCATCTCCTTCTTTCTTTCAAGAGAAGAAAGAAGGAGATGATCTGCGTTTTGct  
cgagctggcgaattcc  
>CD\_NM\_001561.4:533  
CgCctGcgagtctGGtatGCGGACAAACTGTTCTTTGGATGTTCAAGAGACATCCAAAGAACAGTTTGTCCATTTTTGct  
cgagctggcgaattcc  
>CD\_NM\_001561.4:624  
CgCctGcgagtctGGtatGATCCGGGAGCATCCTCTGTGACTTCAAGAGAGTCACAGAGGATGCTCCCGGAGTTTTGct  
cgagctggcgaattcc  
>CD\_NM\_001561.4:482  
CgCctGcgagtctGGtatGAACTGTTGCTTTGGGACATTTATTCAAGAGATAAATGTCCCAAAGCAACAGTCTTTTTGct  
cgagctggcgaattcc  
>CD\_NM\_001561.4:235  
CgCctGcgagtctGGtatGATGTGATAATAACAGGAATCAGTTCAAGAGACTGATTCCTGTTATTATCACAGTTTTGct  
cgagctggcgaattcc  
>CD\_NM\_001561.4:854  
CgCctGcgagtctGGtatGCGCCGATTTCCAGAAGAAGAAGTTCAAGAGACTTCTTCTTCTGGAAATCGGCATTTTTGct  
cgagctggcgaattcc  
>CD\_NM\_001561.4:726  
CgCctGcgagtctGGtatGCCTTCCCTGCTGTTCTTCTCACTTCAAGAGAGTGAGGAAGAACAGCAGGAAGATTTTTGct  
cgagctggcgaattcc  
>CD\_NM\_001561.4:670



CgCtGcgagtctGGtatGCGGACACTCTCCGCAGATCATCTTCAAGAGAGATGATCTGCGGAGAGTGCCTTTTTTgct  
cgagctggcgaattcc  
>CD\_NM\_001561.4:422  
CgCtGcgagtctGGtatGCGCAGCATGTGTGAACAGGATTTTCAAGAGAAATCCTGTTACACATGCTGCATTTTTGct  
cgagctggcgaattcc  
>CD\_NM\_001561.4:300  
CgCtGcgagtctGGtatGAACAAAGGACCTGTGACATATGTTCAAGAGACATATGTCACAGGTCCCTTGTCTTTTTGct  
cgagctggcgaattcc  
>CD\_NM\_001561.4:354  
CgCtGcgagtctGGtatGCGGAGTGTTCCTCCACCAGCAATTCAAGAGATTGCTGGTGGAGGAACACTCCTTTTTTgct  
cgagctggcgaattcc  
>CD\_NM\_001561.4:875  
CgCtGcgagtctGGtatGAAAGGAGGATGTGAACTGTGAATTCAAGAGATTCACAGTTCACATCCTCCTCTTTTTGct  
cgagctggcgaattcc  
>CD\_NM\_001561.4:222  
CgCtGcgagtctGGtatGAAGCTGGTACATTCTGTGATAATTCAAGAGATTATCACAGAATGTACCAGCTGTTTTTgct  
cgagctggcgaattcc  
>CD\_NM\_001561.4:784  
CgCtGcgagtctGGtatGCCTCCTGTATATATTCAAACAATTCAAGAGATTGTTTGAATATATACAGGAGTTTTTgct  
cgagctggcgaattcc  
>CD\_NM\_001561.4:676  
CgCtGcgagtctGGtatGATCTCCGCAGATCATCTCCTTCTTCAAGAGAGAAGGAGATGATCTGCGGAGAGTTTTTgct  
cgagctggcgaattcc  
>CD\_NM\_001561.4:314  
CgCtGcgagtctGGtatGAACATATGCAGGCAGTGTAAAGTTCAAGAGACTTTACTGCCTGCATATGTCTTTTTGct  
cgagctggcgaattcc  
>CD\_NM\_001561.4:565  
CgCtGcgagtctGGtatGACTTGTGAATGGGACGAAGGAGTTCAAGAGACTCCTTCGTCCCATTACAAGCTTTTTGct  
cgagctggcgaattcc  
>CD\_NM\_002997:453  
CgCtGcgagtctGGtatGCGCCGCAAATTTGTGGCTACTAATTCAAGAGATTAGTAGCCACAATTTGCGGCATTTTTGct  
cgagctggcgaattcc  
>CD\_NM\_002997:529  
CgCtGcgagtctGGtatGATCAGGTGCAGGTGCTTTGCAATTCAAGAGATTGCAAAGCACCTGCACCTGAGTTTTTgct  
cgagctggcgaattcc  
>CD\_NM\_002997:1188  
CgCtGcgagtctGGtatGCTGCTGTGTGCCTGGTGGGTTTTTCAAGAGAAAACCCACCAGGCACACAGCAATTTTTGct  
cgagctggcgaattcc  
>CD\_NM\_002997:452  
CgCtGcgagtctGGtatGATGCCGCAAATTTGTGGCTACTATTCAAGAGATAGTAGCCACAATTTGCGGCAGTTTTTgct  
cgagctggcgaattcc  
>CD\_NM\_001006946.1:1188  
CgCtGcgagtctGGtatGCGCTGTGTGCCTGGTGGGTTTTCTTCAAGAGAGAAACCCACCAGGCACACAGCATTTTTGct  
cgagctggcgaattcc  
>CD\_NM\_001006946.1:534  
CgCtGcgagtctGGtatGCGCAGGTGCTTTGCAAGATATCTTCAAGAGAGATATCTTCAAAGCACCTGCATTTTTGct  
cgagctggcgaattcc  
>CD\_NM\_001006946.1:453  
CgCtGcgagtctGGtatGACCGCAAATTTGTGGCTACTAATTTCAAGAGAATTAGTAGCCACAATTTGCGGCTTTTTGct  
cgagctggcgaattcc  
>CD\_NM\_001006946.1:1197  
CgCtGcgagtctGGtatGACTGGTGGGTTTCATGCTGTACTTCAAGAGAGTACAGCATGAAACCCACCAGGTTTTTGct  
cgagctggcgaattcc  
>CD\_NM\_001006946.1:1209

CgCtGcgagtctGGtatGAATGCTGTACCGCATGAAGAAGTTCAAGAGACTTCTTCATGCGGTACAGCATGTTTTTGct  
cgagctggcgaattcc  
>CD\_NM\_001006946.1:529  
CgCtGcgagtctGGtatGCCAGGTGCAGGTGCTTTGCAAGTTCAAGAGACTTGCAAAGCACCTGCACCTGATTTTTGct  
cgagctggcgaattcc  
>CD\_NM\_001006946.1:452  
CgCtGcgagtctGGtatGAGCAAATTGTGGCTACTAATTTTTCAAGAGAAAATTAGTAGCCACAATTTGCGTTTTTGct  
cgagctggcgaattcc  
>CD\_NM\_001006946.1:1013  
CgCtGcgagtctGGtatGCGCAGGACTTCACCTTTGAACTTCAAGAGAGTTTCAAAGGTGAAGTCTTGCTTTTTTGct  
cgagctggcgaattcc  
>CD\_NM\_001006946.1:1053  
CgCtGcgagtctGGtatGCGTAGTGGCCGTGGAGCCTGACTTCAAGAGAGTCAGGCTCCACGGCCACTACATTTTTGct  
cgagctggcgaattcc  
>CD\_NM\_001006946.1:591  
CgCtGcgagtctGGtatGAACGCAGCTCCTGACGGCTATTTTTCAAGAGAAATAGCCGTCAGGAGCTGCGTTTTTGct  
cgagctggcgaattcc  
>CD\_NM\_001006946.1:1212  
CgCtGcgagtctGGtatGACTGTACCGCATGAAGAAGAAGTTCAAGAGACTTCTTCATGCGGTACAGTTTTTGct  
cgagctggcgaattcc  
>CD\_NM\_001006946.1:1246  
CgCtGcgagtctGGtatGCACTCCTTGAGGAGCCGAACTTCAAGAGAGTTTCGGCTCCTCCAAGGAGTATTTTTGct  
cgagctggcgaattcc  
>CD\_NM\_001006946.1:551  
CgCtGcgagtctGGtatGCTATCACCTTGTCACAGCAGACTTCAAGAGAGTCTGCTGTGACAAGGTGATATTTTTGct  
cgagctggcgaattcc  
>CD\_NM\_001006946.1:925  
CgCtGcgagtctGGtatGAACACAGAGGATGGAGTCTTTTTCAAGAGAAAGGACCTCCATCCTCTGTGTTTTTGct  
cgagctggcgaattcc  
>CD\_NM\_001006946.1:797  
CgCtGcgagtctGGtatGCGGCCTCAACGACCACAGCCACTTCAAGAGAGTGGCTGTGGTCGTTGAGGCCTTTTTGct  
cgagctggcgaattcc  
>CD\_NM\_001006946.1:955  
CgCtGcgagtctGGtatGAAGAGGGCTGCTGAGGATGGAGTTCAAGAGACTCCATCCTCAGCAGCCCTCTTTTTGct  
cgagctggcgaattcc  
>CD\_NM\_001006946.1:858  
CgCtGcgagtctGGtatGAATGCAGCCTGGCCACCATGAGTTCAAGAGACTCATGGTGGCCAGGCTGCATGTTTTGct  
cgagctggcgaattcc  
>CD\_NM\_001006946.1:523  
CgCtGcgagtctGGtatGCCCAGGCTCAGGTGCAGGTGCTTTTCAAGAGAAAGCACCTGCACCTGAGCCGGATTTTTGct  
cgagctggcgaattcc  
>CD\_NM\_001006946.1:1120  
CgCtGcgagtctGGtatGAAGGGCTCCTGGACAGGAAAGTTCAAGAGACTTTCCTGTCCAGGAGGCCCTGTTTTGct  
cgagctggcgaattcc  
>CD\_NM\_001006946.1:865  
CgCtGcgagtctGGtatGACTGGCCACCATGAGACCTCAATTCAAGAGATTGAGGTCTCATGGTGGCCAGGTTTTGct  
cgagctggcgaattcc  
>CD\_NM\_001006946.1:596  
CgCtGcgagtctGGtatGCGCTCCTGACGGCTATTTCCACTTCAAGAGAGTGGGAATAGCCGTCAGGAGTTTTTGct  
cgagctggcgaattcc  
>CD\_NM\_001006946.1:1203  
CgCtGcgagtctGGtatGAGGTTTCATGCTGTACCGCATGTTCAAGAGACATGCGGTACAGCATGAAACCCTTTTTGct  
cgagctggcgaattcc  
>CD\_NM\_001006946.1:1016

CgCctGcgagtctGGtatGCGGACTTCACCTTTGAAACCTCTTCAAGAGAGAGGTTTCAAAGGTGAAGTCCTTTTTTtGct  
cgagctggcgaattcc  
>CD\_NM\_001006946.1:774  
CgCctGcgagtctGGtatGAACACAGCTCCCGACCCTCATTTCAGAGAATGAGTGGTCGGGAGCTGTGTGTTTTTTtGct  
cgagctggcgaattcc  
>CD\_NM\_001006946.1:979  
CgCctGcgagtctGGtatGCCAGTCAGCTCCAGCAGCAGTTCAAGAGACTGCTGCTGGGAGCTGACTGGATTTTTTtGct  
cgagctggcgaattcc  
>CD\_NM\_001006946.1:1205  
CgCctGcgagtctGGtatGATTTTCATGCTGTACCGCATGAATTCAAGAGATTCATGCGGTACAGCATGAACTTTTTTtGct  
cgagctggcgaattcc  
>CD\_NM\_001006946.1:1282  
CgCctGcgagtctGGtatGACCTACCAGAAGCCCACCAAACCTTCAAGAGAGTTTGGTGGGCTTCTGGTAGGCTTTTTTtGct  
cgagctggcgaattcc  
>CD\_NM\_001006946.1:1202  
CgCctGcgagtctGGtatGCGGGTTTCATGCTGTACCGCATTTCAAGAGAATGCGGTACAGCATGAAACCCATTTTTTtGct  
cgagctggcgaattcc  
>CD\_NM\_001006946.1:533  
CgCctGcgagtctGGtatGATGCAGGTGCTTTGCAAGATATTTCAAGAGAATATCTTGCAAAGCACCTGCACTTTTTtGct  
cgagctggcgaattcc  
>CD\_NM\_006206:229  
CgCctGcgagtctGGtatGCCCTCTATCCTTCCAAATGAATTCAAGAGATTCATTTGGAAGGATAGAGGGTTTTTtGct  
cgagctggcgaattcc  
>CD\_NM\_006206:750  
CgCctGcgagtctGGtatGCCCCATTTAATGTTTATGCTTTTTTCAAGAGAAAAGCATAAACATTAATGGGATTTTTTtGct  
cgagctggcgaattcc  
>CD\_NM\_006206:915  
CgCctGcgagtctGGtatGCAGGCATCACAAATGCTGGAAGATTCAAGAGATCTTCCAGCATTGTGATGCCTTTTTtGct  
cgagctggcgaattcc  
>CD\_NM\_006206:2849  
CgCctGcgagtctGGtatGATGGATTCTACTTTCTACAATATTCAAGAGATATTGTAGAAAGTAGAATCCACTTTTTTtGct  
cgagctggcgaattcc  
>CD\_NM\_006206:2101  
CgCctGcgagtctGGtatGAGGGCCACATTTGAACATTGTATTCAAGAGATACAATGTTCAAATGTGGCCCTTTTTTtGct  
cgagctggcgaattcc  
>CD\_NM\_006206.3:2503  
CgCctGcgagtctGGtatGCACTCAGAAGGCCCTTACTTTATTTCAAGAGAATAAAGTAAGGCCTTCTGAGTTTTTtGct  
cgagctggcgaattcc  
>CD\_NM\_006206.3:1484  
CgCctGcgagtctGGtatGCGTGGATGATATGCAAAGATATTTCAAGAGAATATCTTTGCATATCATCCACTTTTTTtGct  
cgagctggcgaattcc  
>CD\_NM\_006206.3:1062  
CgCctGcgagtctGGtatGAACTATTTCTGTCCATGAGAAATTCAAGAGATTTCTCATGGACAGAAATAGTGTTTTTtGct  
cgagctggcgaattcc  
>CD\_NM\_006206.3:1178  
CgCctGcgagtctGGtatGATCCCAGGATATCCTGGCTGAATTCAAGAGATTCAGCCAGGATATCCTGGGAGTTTTTtGct  
cgagctggcgaattcc  
>CD\_NM\_006206.3:2736  
CgCctGcgagtctGGtatGCCCTGAGAGCATCTTTGACAACCTTCAAGAGAGTTGTCAAAGATGCTCTCAGGATTTTTTtGct  
cgagctggcgaattcc  
>CD\_NM\_006206.3:225  
CgCctGcgagtctGGtatGCTTACCTCTATCCTTCCAAATTTCAAGAGAATTTGGAAGGATAGAGGGTAATTTTTTtGct  
cgagctggcgaattcc  
>CD\_NM\_006206.3:1767

CgCctGcgagtctGGtatGATCACTTATTGTCCTGGTTGTCTTCAAGAGAGACAACCAGGACAATAAGTGAGTTTTTgct  
cgagctggcgaattcc  
>CD\_NM\_006206.3:1776  
CgCctGcgagtctGGtatGCGTCTGGTTGTCATTTGGAAATTC AAGAGATTTCCAAATGACAACCAGGACATTTTTGct  
cgagctggcgaattcc  
>CD\_NM\_006206.3:1479  
CgCctGcgagtctGGtatGCATTGAGTGGATGATATGCAAATTC AAGAGATTTGCATATCATCCACTCAATATTTTTGct  
cgagctggcgaattcc  
>CD\_NM\_006206.3:1996  
CgCctGcgagtctGGtatGAGGTCCCAACCTGTCATGAAAGTTCAAGAGACTTTCATGACAGGTTGGGACCGTTTTTgct  
cgagctggcgaattcc  
>CD\_NM\_006206.3:2331  
CgCctGcgagtctGGtatGCGGTGACTACATGGACATGAAGTTCAAGAGACTTCATGTCCATGTAGTCACCATTTTTGct  
cgagctggcgaattcc  
>CD\_NM\_006206.3:2193  
CgCctGcgagtctGGtatGAGTCAACTATTTGCATAAGAATTTCAAGAGAATTTCTTATGCAAATAGTTGACTTTTTgct  
cgagctggcgaattcc  
>CD\_NM\_006206.3:3094  
CgCctGcgagtctGGtatGAACTCAGACAATGCATACATTGTTCAAGAGACAATGTATGCATTGTCTGAGTCTTTTTGct  
cgagctggcgaattcc  
>CD\_NM\_006206.3:2488  
CgCctGcgagtctGGtatGATCCTTTCAGATGATAACTCAGTTC AAGAGACTGAGTTATCATCTGAAAGGAGTTTTTgct  
cgagctggcgaattcc  
>CD\_NM\_006206.3:2849  
CgCctGcgagtctGGtatGCGGATTCTACTTTCTACAATAATTC AAGAGATTATTGTAGAAAGTAGAATCCATTTTTGct  
cgagctggcgaattcc  
>CD\_NM\_006206.3:2103  
CgCctGcgagtctGGtatGACCACATTTGAACATTGTAAACTTC AAGAGAGTTTACAATGTTCAAATGTGGCTTTTTGct  
cgagctggcgaattcc  
>CD\_NM\_006206.3:2236  
CgCctGcgagtctGGtatGAACCCAGAGAAGCCAAAGAAAGTTCAAGAGACTTCTTTGGCTTCTCTGGGTGTTTTTgct  
cgagctggcgaattcc  
>CD\_NM\_006206.3:2184  
CgCctGcgagtctGGtatGCGGAGATTTGGTCAACTATTTGTTCAAGAGACAAATAGTTGACCAAATCTCCATTTTTGct  
cgagctggcgaattcc  
>CD\_NM\_006206.3:1122  
CgCctGcgagtctGGtatGCGCTGTCAACCTGCATGAAGTCTTCAAGAGAGACTTCATGCAGGTTGACAGCTTTTTTgct  
cgagctggcgaattcc  
>CD\_NM\_006206.3:2347  
CgCctGcgagtctGGtatGCTGAAGCAGGCTGATACTACACTTCAAGAGAGTGTAGTATCAGCCTGCTTCATTTTTTgct  
cgagctggcgaattcc  
>CD\_NM\_006206.3:1068  
CgCctGcgagtctGGtatGCTCTGTCCATGAGAAAGGTTTCTTCAAGAGAGAAACCTTCTCATGGACAGAATTTTTGct  
cgagctggcgaattcc  
>CD\_NM\_006206.3:175  
CgCctGcgagtctGGtatGATCTTAGGCTGTCTTCTCACAGTTCAAGAGACTGTGAGAAGACAGCCTAAGACTTTTTGct  
cgagctggcgaattcc  
>CD\_NM\_006206.3:1475  
CgCctGcgagtctGGtatGATGATATTGAGTGGATGATATGTTCAAGAGACATATCATCCACTCAATATCAGTTTTTgct  
cgagctggcgaattcc  
>CD\_NM\_006206.3:1542  
CgCctGcgagtctGGtatGAGCCAACAATGTCTCAAACATCTTCAAGAGAGATGTTTGAGACATTGTTGGCCTTTTTGct  
cgagctggcgaattcc  
>CD\_NM\_006206.3:738

CgCtGcgagtctGGtatGATTCCAGACCATCCCATTTAATTTCAAGAGAATTAATGGGATGGTCTGGAACTTTTTGct  
cgagctggcgaattcc  
>CD\_NM\_006206.3:2435  
CgCtGcgagtctGGtatGCTCGTCCAGCCTCATATAAGAATTCAGAGATTCCTATATGAGGCTGGACGATTTTTTGct  
cgagctggcgaattcc  
>CD\_NM\_006206.3:229  
CgCtGcgagtctGGtatGACCTCTATCCTTCCAAATGAAATTCAGAGATTCATTTGGAAGGATAGAGGGTTTTTGct  
cgagctggcgaattcc  
>CD\_NM\_006206.3:2985  
CgCtGcgagtctGGtatGAAGTGAGATTGTGGAGAATCTGTTCAAGAGACAGATTCTCCACAATCTCACTTTTTTGct  
cgagctggcgaattcc  
>CD\_NM\_002609:938  
CgCtGcgagtctGGtatGATGGTGACACTGCACGAGAAGATTCAGAGATCTTCTCGTGCAGTGTACCACTTTTTGct  
cgagctggcgaattcc  
>CD\_NM\_002609:1019  
CgCtGcgagtctGGtatGAAGGACAGAAGCTACATCTGCATTCAAGAGATGCAGATGTAGCTTCTGTCTTTTTTGct  
cgagctggcgaattcc  
>CD\_NM\_002609:2392  
CgCtGcgagtctGGtatGAAGCAGTGAGAAGCAAGCCCTTTTCAAGAGAAAGGGCTTGCTTCTCACTGCTGTTTTTGct  
cgagctggcgaattcc  
>CD\_NM\_002609.3:2493  
CgCtGcgagtctGGtatGCCCCATCTATATCATCACTGAGTTCAAGAGACTCAGTGATGATATAGATGGGTTTTTGct  
cgagctggcgaattcc  
>CD\_NM\_002609.3:1347  
CgCtGcgagtctGGtatGAACGGAGAGTGTGAATGACCATTTCAAGAGAATGGTCATTCACACTCTCCGTTTTTTGct  
cgagctggcgaattcc  
>CD\_NM\_002609.3:1251  
CgCtGcgagtctGGtatGAACTGACTTCTCTTGATATGTTCAAGAGACATATCCAAGAGGAAGTCAGCTTTTTTGct  
cgagctggcgaattcc  
>CD\_NM\_002609.3:2405  
CgCtGcgagtctGGtatGCAGCCCTTATGTCGGAGCTGAATTCAGAGATTCAGCTCCGACATAAGGGCTTTTTTGct  
cgagctggcgaattcc  
>CD\_NM\_002609.3:585  
CgCtGcgagtctGGtatGACCAGAGCTTGTCTCAATGTCTTCAAGAGAGACATTGAGGACAAGCTCTGGCTTTTTTGct  
cgagctggcgaattcc  
>CD\_NM\_002609.3:2909  
CgCtGcgagtctGGtatGCGGAGTTTCTGGCCTCCAAGAATTCAGAGATTCCTGGAGGCCAGAACTCCATTTTTTGct  
cgagctggcgaattcc  
>CD\_NM\_002609.3:2842  
CgCtGcgagtctGGtatGCTCAACGAGTCTCCAGTGCTAATTCAGAGATTAGCACTGGAGACTCGTTGATTTTTTGct  
cgagctggcgaattcc  
>CD\_NM\_002609.3:837  
CgCtGcgagtctGGtatGAACCGTGGGCTTCTCCCTAATTTCAAGAGAATTAGGGAGGAAGCCCACGGTTTTTTGct  
cgagctggcgaattcc  
>CD\_NM\_002609.3:2040  
CgCtGcgagtctGGtatGACCACACTCCTTGCCCTTTAAGTTCAAGAGACTTAAAGGGCAAGGAGTGTGGCTTTTTTGct  
cgagctggcgaattcc  
>CD\_NM\_002609.3:2816  
CgCtGcgagtctGGtatGATGAGAGGACCTGCCGAGCAACTTCAGAGAGTTGCTCGGCAGGTCTCTCAGTTTTTGct  
cgagctggcgaattcc  
>CD\_NM\_002609.3:3768  
CgCtGcgagtctGGtatGCGCAGAGGATAGCTTCTGTAGTTCAAGAGACTACAGGAAGCTATCTCTGCTTTTTTGct  
cgagctggcgaattcc  
>CD\_NM\_002609.3:2096

CgCctGcgagtctGGtatGCGCTCACCATCATCTCCCTTATTTCAAGAGAATAAGGGAGATGATGGTGAGCATTMTTGGct  
cgagctggcgaattcc  
>CD\_NM\_002609.3:719  
CgCctGcgagtctGGtatGCGCTCACACTGACCAACCTCACTTCAAGAGAGTGAGGTTGGTCAGTGTGAGCATTMTTGGct  
cgagctggcgaattcc  
>CD\_NM\_002609.3:1500  
CgCctGcgagtctGGtatGCCGCCCCTGTCCTGTGGTTCTTCAAGAGAGAACCACAGGACAGTGGGCGGTTTTTGGct  
cgagctggcgaattcc  
>CD\_NM\_002609.3:492  
CgCctGcgagtctGGtatGCGCTCTGGCCCTCAAAGGCGAGTTCAAGAGACTCGCCTTTGAGGGCCAGAGCTTTTTTGGct  
cgagctggcgaattcc  
>CD\_NM\_002609.3:2172  
CgCctGcgagtctGGtatGAATTGAGTCTGTGAGCTCTGACTTCAAGAGAGTCAGAGCTCACAGACTCAATCTTTTTGGct  
cgagctggcgaattcc  
>CD\_NM\_002609.3:3632  
CgCctGcgagtctGGtatGACTCAACCATCTCCTGTGACAGTTCAAGAGACTGTCACAGGAGATGGTTGAGTTTTTGGct  
cgagctggcgaattcc  
>CD\_NM\_002609.3:1509  
CgCctGcgagtctGGtatGCGTCTGTGGTTCAAAGACAACCTTCAAGAGAGTTGTCTTTGAACCACAGGACATTMTTGGct  
cgagctggcgaattcc  
>CD\_NM\_002609.3:2960  
CgCctGcgagtctGGtatGCCGTGCTCATCTGTGAAGGCAATTCAAGAGATTGCCTTACAGATGAGCACGTTTTTGGct  
cgagctggcgaattcc  
>CD\_NM\_002609.3:2153  
CgCctGcgagtctGGtatGCCGAGATCCGATGGAAGGTGATTTCAAGAGAATCACCTTCCATCGGATCTCGTTTTTGGct  
cgagctggcgaattcc  
>CD\_NM\_002609.3:2535  
CgCctGcgagtctGGtatGAGTGGACTACCTGCACCGCAACTTCAAGAGAGTTGCGGTGCAGGTAGTCCACCTTTTTGGct  
cgagctggcgaattcc  
>CD\_NM\_002609.3:2052  
CgCctGcgagtctGGtatGACCCTTTAAGGTGGTGGTGATCTTCAAGAGAGATCACCACCACCTTAAAGGGCTTTTTGGct  
cgagctggcgaattcc  
>CD\_NM\_002609.3:936  
CgCctGcgagtctGGtatGAGTGGTGACTGCACGAGAAGTTCAAGAGACTTCTCGTGCAGTGTACCACCTTTTTGGct  
cgagctggcgaattcc  
>CD\_NM\_002609.3:1353  
CgCctGcgagtctGGtatGAAGTGTGAATGACCATCAGGATTTCAAGAGAATCCTGATGGTCATTACACTTTTTTGGct  
cgagctggcgaattcc  
>CD\_NM\_002609.3:1104  
CgCctGcgagtctGGtatGCTCCATCAACGTCTCTGTGAACTTCAAGAGAGTTCACAGAGACGTTGATGGATTTTTTGGct  
cgagctggcgaattcc  
>CD\_NM\_002609.3:2109  
CgCctGcgagtctGGtatGATCCCTTATCATCCTCATCATGTTCAAGAGACATGATGAGGATGATAAGGGAGTTTTTGGct  
cgagctggcgaattcc  
>CD\_NM\_002609.3:1091  
CgCctGcgagtctGGtatGAACTCCAGGTGTCATCCATCAATTCAAGAGATTGATGGATGACACCTGGAGTCTTTTTGGct  
cgagctggcgaattcc  
>CD\_NM\_002609.3:2601  
CgCctGcgagtctGGtatGAAGCGCGGAGCTCTACAGCAATTTCAAGAGAATTGCTGTAGAGCTCCGCGCTTTTTTGGct  
cgagctggcgaattcc  
>CD\_NM\_002609.3:2120  
CgCctGcgagtctGGtatGCCCTCATCATGCTTTGGCAGAATTTCAAGAGATTCTGCCAAAGCATGATGAGGATTTTTTGGct  
cgagctggcgaattcc  
>CD\_NM\_002609.3:1592

CgCtGcgagtctGGtatGACCGGTATGTGTCAGAGCTGACTTCAAGAGAGTCAGCTCTGACACATAACGGGTTTTTGct  
cgagctggcgaattcc  
>CD\_NM\_000361:495  
CgCtGcgagtctGGtatGAGGGAGACAACAACACCAGCTATTCAAGAGATAGCTGGTGTGTTGTCTCCGTTTTTGct  
cgagctggcgaattcc  
>CD\_NM\_000361:620  
CgCtGcgagtctGGtatGAAGGAGCAGCAGTGCGAAGTGATTCAAGAGATCACTTCGCACTGCTGCTCCTTTTTTGct  
cgagctggcgaattcc  
>CD\_NM\_000361:1034  
CgCtGcgagtctGGtatGCGCGAGCACTTCTGCGTTCCTATTCAAGAGATGGGAACGCAGAAGTGCTCGCATTTTTTGct  
cgagctggcgaattcc  
>CD\_NM\_000361:1463  
CgCtGcgagtctGGtatGAACGGTTTCATCTGCACGGACATTCAAGAGATGTCCGTGCAGATGAAACCGTTTTTTGct  
cgagctggcgaattcc  
>CD\_NM\_000361:1477  
CgCtGcgagtctGGtatGAACGGACATCGACGAGTGCGAATTCAAGAGATTCGCACTCGTCGATGTCCGTTTTTTGct  
cgagctggcgaattcc  
>CD\_NM\_000361:1199  
CgCtGcgagtctGGtatGCTCGAGTGCCACTGCTACCCTATTCAAGAGATAGGGTAGCAGTGGCACTCGAATTTTTGct  
cgagctggcgaattcc  
>CD\_NM\_000361.2:1199  
CgCtGcgagtctGGtatGCCGAGTGCCACTGCTACCCTAATTCAAGAGATTAGGGTAGCAGTGGCACTCGAATTTTTGct  
cgagctggcgaattcc  
>CD\_NM\_000361.2:357  
CgCtGcgagtctGGtatGAGCTGCCGATGTCATTTCTTGTTCAGAGACAAGGAAATGACATCGGCAGCCTTTTTGct  
cgagctggcgaattcc  
>CD\_NM\_000361.2:1463  
CgCtGcgagtctGGtatGCCGGTTTCATCTGCACGGACATTTCAAGAGAATGTCCGTGCAGATGAAACCGTTTTTGct  
cgagctggcgaattcc  
>CD\_NM\_000361.2:366  
CgCtGcgagtctGGtatGCGTCATTTCTTGTACTGAACCTCAAGAGAGTTCAGTAGCAAGGAAATGACATTTTTGct  
cgagctggcgaattcc  
>CD\_NM\_000361.2:722  
CgCtGcgagtctGGtatGACGTCTCGATCACCTACGGCACTTCAAGAGAGTGCCGTAGGTGATCGAGACGGTTTTTGct  
cgagctggcgaattcc  
>CD\_NM\_000361.2:1701  
CgCtGcgagtctGGtatGCTCGGGCTTGCTCATAGGCATCTTCAAGAGAGATGCCTATGAGCAAGCCGAATTTTTGct  
cgagctggcgaattcc  
>CD\_NM\_000361.2:1797  
CgCtGcgagtctGGtatGAAGGGCCAAGATGGAGTACAAGTTCAAGAGACTTGTACTCCATCTTGGCCCTGTTTTTGct  
cgagctggcgaattcc  
>CD\_NM\_000361.2:642  
CgCtGcgagtctGGtatGAGCCGATGGCTTCTCTGCGAGTTCAAGAGACTCGCAGAGGAAGCCATCGGCCTTTTTGct  
cgagctggcgaattcc  
>CD\_NM\_000361.2:240  
CgCtGcgagtctGGtatGAAGCCAGTGCCTCGAGCACGACTTCAAGAGAGTCGTGCTCGACGCACTGGCTGTTTTTGct  
cgagctggcgaattcc  
>CD\_NM\_000361.2:365  
CgCtGcgagtctGGtatGCTGTCAATTTCTTGTACTGAATTCAAGAGATTCAGTAGCAAGGAAATGACATTTTTTGct  
cgagctggcgaattcc  
>CD\_NM\_000361.2:1236  
CgCtGcgagtctGGtatGAGGCGAGTGTGTTGGAGCCGTGTTCAAGAGACACGGGCTCCACACACTCGCCGTTTTTGct  
cgagctggcgaattcc  
>CD\_NM\_000361.2:478

CgCtGcgagtctGGtatGAGCTTCCAGTGGGTTACGGGAGTTCAAGAGACTCCCGTAACCCACTGGAAGCCTTTTTGct  
cgagctggcgaattcc  
>CD\_NM\_000361.2:1061  
CgCtGcgagtctGGtatGCCAGCCGGCTCCTACTCGTGTTC AAGAGACACGAGTAGGAGCCCGCTGGTTTTTTGct  
cgagctggcgaattcc  
>CD\_NM\_000361.2:1596  
CgCtGcgagtctGGtatGATGTGACTCCGGCAAGGTGGACTTCAAGAGAGTCCACCTTGCCGGAGTCACAGTTTTTTGct  
cgagctggcgaattcc  
>CD\_NM\_000361.2:497  
CgCtGcgagtctGGtatGAAGACAACAACACCAGCTATAGTTCAAGAGACTATAGCTGGTGTGTGTCTTTTTTTGct  
cgagctggcgaattcc  
>CD\_NM\_000361.2:1590  
CgCtGcgagtctGGtatGAACCGACTGTGACTCCGGCAAGTTCAAGAGACTTGCCGGAGTCACAGTCGGTGTTTTTTTGct  
cgagctggcgaattcc  
>CD\_NM\_000361.2:1215  
CgCtGcgagtctGGtatGACCTAACTACGACCTGGTGGACTTCAAGAGAGTCCACCAGGTCGTAGTTAGGGTTTTTTGct  
cgagctggcgaattcc  
>CD\_NM\_000361.2:885  
CgCtGcgagtctGGtatGCTGGGACTGCAGCGTGAGAACTTCAAGAGAGTCTCCACGCTGCAGTCCCAATTTTTTTGct  
cgagctggcgaattcc  
>CD\_NM\_000361.2:1431  
CgCtGcgagtctGGtatGATGTGAGTGCCCTGAAGGCTACTTCAAGAGAGTAGCCTTCAGGGCACTCACAGTTTTTTGct  
cgagctggcgaattcc  
>CD\_NM\_000361.2:291  
CgCtGcgagtctGGtatGATTCTCAATGCCAGTCAGATCTTCAAGAGAGATCTGACTGGCATTGAGGAAGTTTTTTGct  
cgagctggcgaattcc  
>CD\_NM\_000361.2:495  
CgCtGcgagtctGGtatGAGGAGACAACAACACCAGCTATTTCAAGAGAATAGCTGGTGTGTGTCTCCCTTTTTTTGct  
cgagctggcgaattcc  
>CD\_NM\_000361.2:1129  
CgCtGcgagtctGGtatGAAGGACGTGGATGACTGCATACTTCAAGAGAGTATGCAGTCATCCACGTCTTTTTTTGct  
cgagctggcgaattcc  
>CD\_NM\_000361.2:1168  
CgCtGcgagtctGGtatGACGCAGCGCTGTGTCAACACACTTCAAGAGAGTGTGTTGACACAGCGCTGCGTTTTTTGct  
cgagctggcgaattcc  
>CD\_NM\_000361.2:1761  
CgCtGcgagtctGGtatGACTCTCTGCCACCTGCGCAAGTTCAAGAGACTTGCGCAGGTGGCAGAGGAGCTTTTTTTGct  
cgagctggcgaattcc  
>CD\_NM\_000361.2:1381  
CgCtGcgagtctGGtatGCGCAACCAGACTGCCTGTCCAGTTCAAGAGACTGGACAGGCAGTCTGGTTGCATTTTTTTGct  
cgagctggcgaattcc  
>CD\_NM\_000361.2:620  
CgCtGcgagtctGGtatGCGGAGCAGCAGTGCGAAGTGAATTCAAGAGATTCACTTCGCACTGCTGCTCCTTTTTTTGct  
cgagctggcgaattcc  
>CD\_NM\_000361.2:1791  
CgCtGcgagtctGGtatGAGCCGCCAGGGCCAAGATGGAGTTCAAGAGACTCCATCTTGCCCTGGCGGCTTTTTTTGct  
cgagctggcgaattcc  
>CD\_NM\_001993:211  
CgCtGcgagtctGGtatGACCGGCGCTTCAGGCACTACAATTC AAGAGATTGTAGTGCCTGAAGCGCCGCTTTTTTTGct  
cgagctggcgaattcc  
>CD\_NM\_001993:594  
CgCtGcgagtctGGtatGAACCGTAGAAGATGAACGGACTTTCAAGAGAAGTCCGTTTCTTCTACGGTCTTTTTTTGct  
cgagctggcgaattcc  
>CD\_NM\_001993.2:518



CgCctGcgagtctGGtatGAACACCTTACCTGGAGACAAACTTCAAGAGAGTTTGTCTCCAGGTAAGGTGTGTTTTTGct  
cgagctggcgaattcc  
>CD\_NM\_001993.2:227  
CgCctGcgagtctGGtatGCACAAATACTGTGGCAGCATATTTCAAGAGAATATGCTGCCACAGTATTTGTATTTTTTGct  
cgagctggcgaattcc  
>CD\_NM\_001993.2:771  
CgCctGcgagtctGGtatGCACTGTTTCAGTGTTCAAGCAGTTCAAGAGACTGCTTGAACACTGAAACAGTATTTTTTGct  
cgagctggcgaattcc  
>CD\_NM\_001993.2:263  
CgCctGcgagtctGGtatGCTCAACTAATTTCAAGACAATTTTCAAGAGAAATTGTCTTGAAATTAGTTGATTTTTTGct  
cgagctggcgaattcc  
>CD\_NM\_001993.2:376  
CgCctGcgagtctGGtatGAAGACACAGAGTGTGACCTCACTTCAAGAGAGTGAGGTCACACTCTGTGTCTGTTTTTGct  
cgagctggcgaattcc  
>CD\_NM\_001993.2:838  
CgCctGcgagtctGGtatGCAGAGTGTATGGGCCAGGAGAATTCAAGAGATTCTCCTGGCCCATACTCTATTTTTTGct  
cgagctggcgaattcc  
>CD\_NM\_001993.2:928  
CgCctGcgagtctGGtatGCCCTGGCTATATCTCTACACAATTCAAGAGATTGTGTAGAGATATAGCCAGGATTTTTTGct  
cgagctggcgaattcc  
>CD\_NM\_001993.2:380  
CgCctGcgagtctGGtatGAACAGAGTGTGACCTCACCGACTTCAAGAGAGTCGGTGAGGTCACACTCTGTGTTTTTGct  
cgagctggcgaattcc  
>CD\_NM\_001993.2:658  
CgCctGcgagtctGGtatGCTGGCAAGGACTTAATTTATACTTCAAGAGAGTATAAATTAAGTCCTTGCCAATTTTTTGct  
cgagctggcgaattcc  
>CD\_NM\_001993.2:687  
CgCctGcgagtctGGtatGCATTGGAAATCTTCAAGTTCAGTTCAAGAGACTGAACTTGAAGATTTCCAATATTTTTTGct  
cgagctggcgaattcc  
>CD\_NM\_001993.2:212  
CgCctGcgagtctGGtatGAGGCGCTTCAGGCACACAAATTTCAAGAGAATTTGTAGTGCCTGAAGCGCCGTTTTTGct  
cgagctggcgaattcc  
>CD\_NM\_001993.2:395  
CgCctGcgagtctGGtatGAACCGACGAGATTGTGAAGGATTTCAAGAGAATCCTTCACAATCTCGTCGGTGTTTTTTGct  
cgagctggcgaattcc  
>CD\_NM\_001993.2:917  
CgCctGcgagtctGGtatGACTTGTCATCATCCTGGCTATATTTCAAGAGATATAGCCAGGATGATGACAAGGTTTTTGct  
cgagctggcgaattcc  
>CD\_NM\_001993.2:320  
CgCctGcgagtctGGtatGAACTGTTCAAATAAGCACTAAGTTCAAGAGACTTAGTGCTTATTTGAACAGTGTTTTTTGct  
cgagctggcgaattcc  
>CD\_NM\_001993.2:608  
CgCctGcgagtctGGtatGCCGGACTTTAGTCAGAAGGAACTTCAAGAGAGTTCCTTCTGACTAAAGTCCGTTTTTTTGct  
cgagctggcgaattcc  
>CD\_NM\_001993.2:262  
CgCctGcgagtctGGtatGCATCAACTAATTTCAAGACAATTTCAAGAGAATTTGTCTTGAAATTAGTTGATTTTTTTTGct  
cgagctggcgaattcc  
>CD\_NM\_001993.2:773  
CgCctGcgagtctGGtatGATGTTTCAGTGTTCAAGCAGTGTTCAAGAGACACTGCTTGAACACTGAAACAGTTTTTTTGct  
cgagctggcgaattcc  
>CD\_NM\_001993.2:235  
CgCctGcgagtctGGtatGATGTGGCAGCATATAATTTAACTTCAAGAGAGTTAAATTATATGCTGCCACAGTTTTTTTGct  
cgagctggcgaattcc  
>CD\_NM\_001993.2:885

CgCctGcgagtctGGtatGCTCATTGGAGCTGTGGTATTTGTTCAAGAGACAAATACCACAGCTCCAATGATTTTTTGct  
cgagctggcgaattcc  
>CD\_NM\_001993.2:237  
CgCctGcgagtctGGtatGATGGCAGCATATAATTTAACTTTTCAAGAGAAAGTTAAATTATATGCTGCCACTTTTTTGct  
cgagctggcgaattcc  
>CD\_NM\_001993.2:907  
CgCctGcgagtctGGtatGCGGTCATCATCCTTGTTCATCATTTTCAAGAGAATGATGACAAGGATGATGACCATTTTTTGct  
cgagctggcgaattcc  
>CD\_NM\_001993.2:231  
CgCctGcgagtctGGtatGCATACTGTGGCAGCATATAATTTTCAAGAGAAATTATATGCTGCCACAGTATTTTTTTTGct  
cgagctggcgaattcc  
>CD\_NM\_001993.2:444  
CgCctGcgagtctGGtatGCTCTCCTACCCGGCAGGGAATGTTCAAGAGACATTCCTGCCGGGTAGGAGAATTTTTTGct  
cgagctggcgaattcc  
>CD\_NM\_001993.2:905  
CgCctGcgagtctGGtatGCGTGGTCATCATCCTTGTTCATCTTCAAGAGAGATGACAAGGATGATGACCACATTTTTTGct  
cgagctggcgaattcc  
>CD\_NM\_001993.2:836  
CgCctGcgagtctGGtatGAGTAGAGTGTATGGGCCAGGAGTTCAAGAGACTCCTGGCCATACTACTCTACCTTTTTTGct  
cgagctggcgaattcc  
>CD\_NM\_001993.2:744  
CgCctGcgagtctGGtatGCTGATTGATGTGGATAAAGGAGTTCAAGAGACTCCTTTATCCACATCAATCAATTTTTTGct  
cgagctggcgaattcc  
>CD\_NM\_001993.2:178  
CgCctGcgagtctGGtatGAGCTCCTGCTCGGCTGGGTCTTTTTCAAGAGAAAGACCCAGCCGAGCAGGAGCGTTTTTGct  
cgagctggcgaattcc  
>CD\_NM\_001993.2:800  
CgCctGcgagtctGGtatGATCCCGAACAGTTAACCGGAAGTTCAAGAGACTTCCGGTTAACTGTTCTGGGAGTTTTTGct  
cgagctggcgaattcc  
>CD\_NM\_001993.2:312  
CgCctGcgagtctGGtatGAAAGTCTACTGTTCAAATAATTCAAGAGATTATTTGAACAGTGTAGACTTGTTTTTTGct  
cgagctggcgaattcc  
>CD\_NM\_001993.2:398  
CgCctGcgagtctGGtatGAGACGAGATTGTGAAGGATGTGTTCAAGAGACACATCCTTACAATCTCGTCGTTTTTGct  
cgagctggcgaattcc  
>CD\_NM\_001993.2:663  
CgCctGcgagtctGGtatGCAGGACTTAATTTATACACTTTTTTCAAGAGAAAAGTGTATAAATTAAGTCCTTTTTTTTGct  
cgagctggcgaattcc  
>CD\_NM\_000789:1965  
CgCctGcgagtctGGtatGCGGCCAGCAAGTTTGTGGAGGATTCAAGAGATCCTCCACAACTTGCTGGCCTTTTTTGct  
cgagctggcgaattcc  
>CD\_NM\_000789:2000  
CgCctGcgagtctGGtatGCCCCAGGTGGTGTGGAACGAGTTTCAAGAGAACTCGTTCCACACCACCTGGGATTTTTTGct  
cgagctggcgaattcc  
>CD\_NM\_000789:2024  
CgCctGcgagtctGGtatGACCGAGGCCAACTGGAACACTACATTCAAGAGATGTAGTTCCAGTTGGCCTCGCTTTTTTGct  
cgagctggcgaattcc  
>CD\_NM\_000789:2460  
CgCctGcgagtctGGtatGACCGGCTCAATGGCTATGTAGATTCAAGAGATCTACATAGCCATTGAGCCGGTTTTTGct  
cgagctggcgaattcc  
>CD\_NM\_000789:2672  
CgCctGcgagtctGGtatGCGGGCGCAGACCTGGTCCAACATTCAAGAGATGTTGGACCAGGTCTGCGCCATTTTTTGct  
cgagctggcgaattcc  
>CD\_NM\_000789:3605

CgCtGcgagtctGGtatGCCGGCCATGTTGAGCTACTTCATTCAAGAGATGAAGTAGCTCAACATGGCCGATTTTTTGct  
cgagctggcgaattcc  
>CD\_NM\_000789.2:852  
CgCtGcgagtctGGtatGACCTGCTCATCTGCTGGGAGACTTCAAGAGAGTCTCCCAGCAGATGAGCAGGGTTTTTGct  
cgagctggcgaattcc  
>CD\_NM\_000789.2:2997  
CgCtGcgagtctGGtatGAATCCAGTATTTTCATGCAGTACTTCAAGAGAGTACTGCATGAAATACTGGATTTTTTGct  
cgagctggcgaattcc  
>CD\_NM\_000789.2:2739  
CgCtGcgagtctGGtatGAACAGAGGCTATGCTAAAGCAGTTCAAGAGACTGCTTTAGCATAGCCTCTGTGTTTTTGct  
cgagctggcgaattcc  
>CD\_NM\_000789.2:2067  
CgCtGcgagtctGGtatGAAGCAAGATTCTGCTGCAGAAGTTCAAGAGACTTCTGCAGCAGAATCTTGCTGTTTTTGct  
cgagctggcgaattcc  
>CD\_NM\_000789.2:1806  
CgCtGcgagtctGGtatGCGCCCAGCCGCTGCTCAAGTACTTCAAGAGAGTACTTGAGCAGCGGCTGGGCATTTTTTGct  
cgagctggcgaattcc  
>CD\_NM\_000789.2:2166  
CgCtGcgagtctGGtatGAACTATCAAGCGGATCATAAAGTTCAAGAGACTTTATGATCCGCTTGATAGTTTTTTGct  
cgagctggcgaattcc  
>CD\_NM\_000789.2:2559  
CgCtGcgagtctGGtatGACCACTCTACCTCAACCTGCATTTCAAGAGAATGCAGGTTGAGGTAGAGTGGCTTTTTTGct  
cgagctggcgaattcc  
>CD\_NM\_000789.2:1968  
CgCtGcgagtctGGtatGAAGCAAGTTTGTGGAGGAATATTTCAAGAGAATATTCCTCCACAAACTTGCTGTTTTTGct  
cgagctggcgaattcc  
>CD\_NM\_000789.2:2220  
CgCtGcgagtctGGtatGCGCCCAGGAGCTGGAGGAGTACTTCAAGAGAGTACTCCTCCAGCTCCTGGGCATTTTTTGct  
cgagctggcgaattcc  
>CD\_NM\_000789.2:1357  
CgCtGcgagtctGGtatGAACACGGAAAGTGACATCAATTTTCAAGAGAAATTGATGTCACTTTCCGTGTCTTTTTTGct  
cgagctggcgaattcc  
>CD\_NM\_000789.2:1761  
CgCtGcgagtctGGtatGATGGCAGGAGGTGCTGAAGGACTTCAAGAGAGTCCCTCAGCACCTCCTGCCAGTTTTTGct  
cgagctggcgaattcc  
>CD\_NM\_000789.2:1367  
CgCtGcgagtctGGtatGATGACATCAATTACTTGCTAAATTTCAAGAGATTTAGCAAGTAATTGATGTCACTTTTTTGct  
cgagctggcgaattcc  
>CD\_NM\_000789.2:3089  
CgCtGcgagtctGGtatGACCTCTCAGTGTCTACGCCAATTCAAGAGATTGGGCGTAGACACTGAGAGGGTTTTTGct  
cgagctggcgaattcc  
>CD\_NM\_000789.2:1359  
CgCtGcgagtctGGtatGAACGGAAAGTGACATCAATTACTTCAAGAGAGTAATTGATGTCACTTTCCGTGTTTTTGct  
cgagctggcgaattcc  
>CD\_NM\_000789.2:2460  
CgCtGcgagtctGGtatGACGGCTCAATGGCTATGTAGATTTCAAGAGAATCTACATAGCCATTGAGCCGGTTTTTGct  
cgagctggcgaattcc  
>CD\_NM\_000789.2:2454  
CgCtGcgagtctGGtatGAGCTGCCCGGCTCAATGGCTATTTCAAGAGAATAGCCATTGAGCCGGGCAGCCTTTTTTGct  
cgagctggcgaattcc  
>CD\_NM\_000789.2:1581  
CgCtGcgagtctGGtatGCGTTCCAAATGTGACACCATACTTCAAGAGAGTATGGTGTACATTTGGAACATTTTTTGct  
cgagctggcgaattcc  
>CD\_NM\_000789.2:3401

CgCtGcgagtctGGtatGAGTACTTTGTCAGCTTCATCATTTCAAGAGAATGATGAAGCTGACAAAGTACTTTTTgct  
cgagctggcgaattcc  
>CD\_NM\_000789.2:2279  
CgCtGcgagtctGGtatGCGGCCACTGTGTGCCACCCGAATTCAGAGATTCGGGTGGCACACAGTGGCCATTTTTGct  
cgagctggcgaattcc  
>CD\_NM\_000789.2:3792  
CgCtGcgagtctGGtatGAGGCCAGTGGCTGCTGCTCTTCTTCAAGAGAGAAGAGCAGCAGCCACTGGCCTTTTTgct  
cgagctggcgaattcc  
>CD\_NM\_000789.2:1839  
CgCtGcgagtctGGtatGAACCCAGTGGCTGCAGGAGCAGTTCAAGAGACTGCTCCTGCAGCCACTGGGTGTTTTTgct  
cgagctggcgaattcc  
>CD\_NM\_000789.2:2024  
CgCtGcgagtctGGtatGACGAGGCCAACTGGAACACTACAATTCAAGAGATTGTAGTTCAGTTGGCTCGGTTTTTgct  
cgagctggcgaattcc  
>CD\_NM\_000789.2:3605  
CgCtGcgagtctGGtatGAGGCCATGTTGAGCTACTTCAATTCAAGAGATTGAAGTAGCTCAACATGGCCGTTTTTgct  
cgagctggcgaattcc  
>CD\_NM\_000789.2:3294  
CgCtGcgagtctGGtatGAAGCCTCAGGCTGAAGTACCAGTTCAAGAGACTGGTACTTCAGCCTGAGGCTTTTTTgct  
cgagctggcgaattcc  
>CD\_NM\_000789.2:2169  
CgCtGcgagtctGGtatGCATCAAGCGGATCATAAAGAAGTTCAAGAGACTTCTTTATGATCCGCTTGATATTTTTGct  
cgagctggcgaattcc  
>CD\_NM\_000789.2:3165  
CgCtGcgagtctGGtatGAATCAACTTTCTGATGAAGATGTTCAAGAGACATCTTCATCAGAAAGTTGATGTTTTTgct  
cgagctggcgaattcc  
>CD\_NM\_000789.2:695  
CgCtGcgagtctGGtatGACTACTGGCGCTCCTGGTACAATTCAAGAGATTGTACCAGGAGCGCCAGTAGGTTTTTgct  
cgagctggcgaattcc  
>CD\_NM\_001795:676  
CgCtGcgagtctGGtatGAACGCCTCTGTCATGTACCAAATTCAAGAGATTTGGTACATGACAGAGGCGTTTTTTgct  
cgagctggcgaattcc  
>CD\_NM\_001795:1030  
CgCtGcgagtctGGtatGAACGCTTTCACCATTGAGACAATTCAAGAGATTGTCTCAATGGTGAAAGCGTTTTTTgct  
cgagctggcgaattcc  
>CD\_NM\_001795:1078  
CgCtGcgagtctGGtatGCAGCCCATGAAGCCTCTGGATTTTTCAAGAGAAATCCAGAGGCTTCATGGGCTTTTTTgct  
cgagctggcgaattcc  
>CD\_NM\_001795:1366  
CgCtGcgagtctGGtatGAGCCAGTTCTTCCGAGTCACAATTCAAGAGATTGTGACTCGGAAGAACTGGCCTTTTTgct  
cgagctggcgaattcc  
>CD\_NM\_001795:1643  
CgCtGcgagtctGGtatGAACCACGAAACGTGAAGTTCAATTCAAGAGATTGAACTTCACGTTTCGTGGTGTTTTTGct  
cgagctggcgaattcc  
>CD\_NM\_001795:2380  
CgCtGcgagtctGGtatGAACGTGGATTACGACTTCCTTATTCAAGAGATAAGGAAGTCGTAATCCACGTCTTTTTGct  
cgagctggcgaattcc  
>CD\_NM\_001795.2:2453  
CgCtGcgagtctGGtatGACGGGAGGAGCTGCTGTATTAGTTCAAGAGACTAATACAGCAGCTCCTCCCGTTTTTgct  
cgagctggcgaattcc  
>CD\_NM\_001795.2:1184  
CgCtGcgagtctGGtatGAAGAGCCCAGGTCATTATCAACTTCAAGAGAGTTGATAATGACCTGGGCTCTGTTTTTgct  
cgagctggcgaattcc  
>CD\_NM\_001795.2:446

CgCctGcgagtctGGtatGACGGGAGAATATCTCAGAGTACTTCAAGAGAGTACTCTGAGATATTCTCCCGGTTTTTgct  
cgagctggcgaattcc  
>CD\_NM\_001795.2:2369  
CgCctGcgagtctGGtatGCTCCGACTCTGACGTGGATTACTTCAAGAGAGTAATCCACGTCAGAGTCGATTTTTTgct  
cgagctggcgaattcc  
>CD\_NM\_001795.2:539  
CgCctGcgagtctGGtatGCGTTCATGACGTGAACGACAACCTTCAAGAGAGTTGTCGTTACGTCATGAACTTTTTTgct  
cgagctggcgaattcc  
>CD\_NM\_001795.2:476  
CgCctGcgagtctGGtatGCGCTGTCATTGTGGACAAGGACTTCAAGAGAGTCCTTGTCCACAATGACAGCATTTTTTGct  
cgagctggcgaattcc  
>CD\_NM\_001795.2:1395  
CgCctGcgagtctGGtatGAACATTTACAATGAGAAAGAACTTCAAGAGAGTCTTTCTCATTGTAAATGTCTTTTTGct  
cgagctggcgaattcc  
>CD\_NM\_001795.2:1867  
CgCctGcgagtctGGtatGCGTTCACCTTCTGCGAGGATATTTCAAGAGAATATCCTCGCAGAAGGTGAACTTTTTTgct  
cgagctggcgaattcc  
>CD\_NM\_001795.2:947  
CgCctGcgagtctGGtatGCGTGGGCTCTCTGTTTGTGAGTTCAAGAGACTCAACAAACAGAGAGCCCACATTTTTGct  
cgagctggcgaattcc  
>CD\_NM\_001795.2:1502  
CgCctGcgagtctGGtatGAATTGTGCAAGTCCACATTGAATTCAAGAGATTCAATGTGGACTTGCACAATGTTTTTgct  
cgagctggcgaattcc  
>CD\_NM\_001795.2:1643  
CgCctGcgagtctGGtatGCCACGAAACGTGAAGTTCAAATTTCAAGAGATTTGAACTTACGTTTTCGTGGTTTTTTGct  
cgagctggcgaattcc  
>CD\_NM\_001795.2:851  
CgCctGcgagtctGGtatGACTGGTCACTCTGCAAGACATCTTCAAGAGAGATGTCTTGCAGAGTGACCAGCTTTTTGct  
cgagctggcgaattcc  
>CD\_NM\_001795.2:857  
CgCctGcgagtctGGtatGAACTCTGCAAGACATCAATGACTTCAAGAGAGTCATTGATGTCTTGCAGAGTGTTTTTGct  
cgagctggcgaattcc  
>CD\_NM\_001795.2:1834  
CgCctGcgagtctGGtatGACGTGGCCGTGTGCAAGTGAATTTCAAGAGATTGCACTTGCACACGGCCACGGTTTTTTGct  
cgagctggcgaattcc  
>CD\_NM\_001795.2:676  
CgCctGcgagtctGGtatGCCGCTCTGTCATGTACCAAATTTCAAGAGAATTTGGTACATGACAGAGGCGTTTTTTGct  
cgagctggcgaattcc  
>CD\_NM\_001795.2:2414  
CgCctGcgagtctGGtatGAAGGTTTAAAGATGCTGGCTGAGTTCAAGAGACTCAGCCAGCATCTTAAACCTGTTTTTgct  
cgagctggcgaattcc  
>CD\_NM\_001795.2:1927  
CgCctGcgagtctGGtatGACATCTTACTCTGCATCCTCACTTCAAGAGAGTGAGGATGCAGAGTAAGATGGTTTTTgct  
cgagctggcgaattcc  
>CD\_NM\_001795.2:511  
CgCctGcgagtctGGtatGCGGAGACTCCTTCCAGCTTCACTTCAAGAGAGTGAAGCTGGAAGGAGTCTCCATTTTTGct  
cgagctggcgaattcc  
>CD\_NM\_001795.2:1715  
CgCctGcgagtctGGtatGAACGGCCAACATCACAGTCAAGTTCAAGAGACTTGACTGTGATGTTGGCCGTTTTTTgct  
cgagctggcgaattcc  
>CD\_NM\_001795.2:259  
CgCctGcgagtctGGtatGAAGATTGGATTTGGAACCAGATTTCAAGAGAATCTGGTTCCAAATCCAATCTTTTTTgct  
cgagctggcgaattcc  
>CD\_NM\_001795.2:1319

CgCctGcgagtctGGtatGAGCTAGGCATAGCATTGGATACTTCAAGAGAGTATCCAATGCTATGCCTAGCCTTTTTTGct  
cgagctggcgaattcc  
>CD\_NM\_001795.2:2165  
CgCctGcgagtctGGtatGCTCCCTCTATGCGCAGGTGCAGTTCAAGAGACTGCACCTGCGCATAGAGGGAATTTTTTGct  
cgagctggcgaattcc  
>CD\_NM\_001795.2:1741  
CgCctGcgagtctGGtatGAGCAGTTTGACCGGGAGCATACTTCAAGAGAGTATGCTCCCGGTCAAACCTGCCTTTTTTGct  
cgagctggcgaattcc  
>CD\_NM\_001795.2:524  
CgCctGcgagtctGGtatGAAGCTTACCATCAAAGTTCATTTCAAGAGAATGAACTTTGATGGTGAAGCTGTTTTTGct  
cgagctggcgaattcc  
>CD\_NM\_001795.2:1942  
CgCctGcgagtctGGtatGCCCTACCATCACAGTGATCACTTCAAGAGAGTGATCACTGTGATGGTGAGGATTTTTTGct  
cgagctggcgaattcc  
>CD\_NM\_001795.2:2381  
CgCctGcgagtctGGtatGAGTGGATTACGACTTCCTTAACTTCAAGAGAGTTAAGGAAGTCGTAATCCACGTTTTTGct  
cgagctggcgaattcc  
>CD\_NM\_001795.2:1366  
CgCctGcgagtctGGtatGACCAGTTCTTCCGAGTCACAAATTCAGAGATTTGTGACTCGGAAGAACTGGCTTTTTTGct  
cgagctggcgaattcc  
>CD\_NM\_006500:1528  
CgCctGcgagtctGGtatGAGGCCTCCAACGACCTGGGCAATTCAGAGATTGCCAGGTCGTTGGAGGCCGTTTTTGct  
cgagctggcgaattcc  
>CD\_NM\_006500:799  
CgCctGcgagtctGGtatGCGCCCGTGGGAATGCTGAAGGATTCAGAGATCCTTCCAGATTCCCACGGGCTTTTTTGct  
cgagctggcgaattcc  
>CD\_NM\_006500:1030  
CgCctGcgagtctGGtatGCACCACAGGAACTACTGGTGAATTCAGAGATTCACCAGTAGTTCCTGTGGTTTTTTTGct  
cgagctggcgaattcc  
>CD\_NM\_006500:537  
CgCctGcgagtctGGtatGACTCAAGTCATCTGGTACAAGATTCAGAGATCTTGTACCAGATGACTTGAGTTTTTTGct  
cgagctggcgaattcc  
>CD\_NM\_006500.2:1759  
CgCctGcgagtctGGtatGCGTCCCTCTATTTCCCTCTATAAGTTCAAGAGACTTATAGAGGAAATAGAGGACATTTTTTGct  
cgagctggcgaattcc  
>CD\_NM\_006500.2:1867  
CgCctGcgagtctGGtatGATCAGATAAGCTCCCAGAAGAGTTCAAGAGACTCTTCTGGGAGCTTATCTGACTTTTTTGct  
cgagctggcgaattcc  
>CD\_NM\_006500.2:591  
CgCctGcgagtctGGtatGCCACATTCAGTCGTCCCAGACTTCAAGAGAGTCTGGGACGACTGAATGTGGATTTTTTGct  
cgagctggcgaattcc  
>CD\_NM\_006500.2:537  
CgCctGcgagtctGGtatGATCAAGTCATCTGGTACAAGAATTCAGAGATCTTGTACCAGATGACTTGAGTTTTTTGct  
cgagctggcgaattcc  
>CD\_NM\_006500.2:466  
CgCctGcgagtctGGtatGAGGCATCCCTGTGAACAGTAAGTTCAAGAGACTTACTGTTTACAGGGATGCCCTTTTTTGct  
cgagctggcgaattcc  
>CD\_NM\_006500.2:1354  
CgCctGcgagtctGGtatGAAAAGAGAATATGGTGTGAAATTTCAAGAGAATTCACACCATATTCTCTTTCTTTTTTGct  
cgagctggcgaattcc  
>CD\_NM\_006500.2:532  
CgCctGcgagtctGGtatGAATTCCTCAAGTCATCTGGTACTTCAAGAGAGTACCAGATGACTTGAGGAATGTTTTTGct  
cgagctggcgaattcc  
>CD\_NM\_006500.2:1030

CgCtGcgagtctGGtatGCCACAGGAActACTGGTGAActTCAAGAGAGTTCACCAGTAGTTCCTGTGGTTTTTTGct  
cgagctggcgaattcc  
>CD\_NM\_006500.2:1841  
CgCtGcgagtctGGtatGCAGAGCGAACTTGTAGTTGAAGTTCAGAGACTTCAACTACAAGTTCGCTCTTTTTTTGct  
cgagctggcgaattcc  
>CD\_NM\_006500.2:966  
CgCtGcgagtctGGtatGCACACAGTGGGCGCTATGAATGTTCAAGAGACATTCATAGCGCCCACTGTGTTTTTTGct  
cgagctggcgaattcc  
>CD\_NM\_006500.2:655  
CgCtGcgagtctGGtatGAGCACAGCTGGTTAAAGAAGACTTCAAGAGAGTCTTCTTTAACCAGCTGTGCCTTTTTGct  
cgagctggcgaattcc  
>CD\_NM\_006500.2:799  
CgCtGcgagtctGGtatGACCCGTGGGAATGCTGAAGGAATTCAAGAGATTCCTTCAGCATTCCCACGGGCTTTTTGct  
cgagctggcgaattcc  
>CD\_NM\_006500.2:1150  
CgCtGcgagtctGGtatGATTCCAGTGGCTGAGAGAAGAGTTCAGAGACTTCTCTCAGCCACTGGAACTTTTGct  
cgagctggcgaattcc  
>CD\_NM\_006500.2:1207  
CgCtGcgagtctGGtatGATTGCATGACCTGAAACGGGAGTTCAGAGACTCCCGTTTCAGGTCATGCAACTTTTTGct  
cgagctggcgaattcc  
>CD\_NM\_006500.2:565  
CgCtGcgagtctGGtatGACCTCTGAAGGAGGAGAAGAACTTCAAGAGAGTCTTCTCCTCCTCAGAGGCTTTTTGct  
cgagctggcgaattcc  
>CD\_NM\_006500.2:1564  
CgCtGcgagtctGGtatGATTCCCTGGAGCTGGTCAATTTATTCAAGAGATAAATTGACCAGCTCCAGGAAGTTTTGct  
cgagctggcgaattcc  
>CD\_NM\_006500.2:559  
CgCtGcgagtctGGtatGCGGCCGGCTCTGAAGGAGGAGTTCAGAGACTCCTCCTCAGAGGCCGCCATTTTTGct  
cgagctggcgaattcc  
>CD\_NM\_006500.2:653  
CgCtGcgagtctGGtatGCAGGCACAGCTGGTTAAAGAAGTTCAGAGACTTCTTTAACCAGCTGTGCCTTTTTGct  
cgagctggcgaattcc  
>CD\_NM\_006500.2:1105  
CgCtGcgagtctGGtatGAAGCCTCACCTGACCTGTGAGTTCAGAGACTCACAGGTCAGGGTGAGGCTTTTTGct  
cgagctggcgaattcc  
>CD\_NM\_006500.2:865  
CgCtGcgagtctGGtatGCCACACTTCAGCATCAGCAAGTTCAGAGACTTGCTGATGCTGAAGTGTGGTTTTTTGct  
cgagctggcgaattcc  
>CD\_NM\_006500.2:907  
CgCtGcgagtctGGtatGAGCAGAGGAAGAGACAACCAACTTCAAGAGAGTGGTTGTCTCTTCTCCTGCCTTTTTGct  
cgagctggcgaattcc  
>CD\_NM\_006500.2:1852  
CgCtGcgagtctGGtatGCGTAGTTGAAGTTAAGTCAGATTTCAAGAGAATCTGACTTAACTTCAACTACATTTTTGct  
cgagctggcgaattcc  
>CD\_NM\_006500.2:1762  
CgCtGcgagtctGGtatGACTCTATTTCTCTATAAGAAGTTCAGAGACTTCTTATAGAGGAAATAGAGGTTTTGct  
cgagctggcgaattcc  
>CD\_NM\_006500.2:870  
CgCtGcgagtctGGtatGCCTCAGCATCAGCAAGCAGAATTCAAGAGATTCGCTTGCTGATGCTGAAGTTTTTTGct  
cgagctggcgaattcc  
>CD\_NM\_006500.2:1152  
CgCtGcgagtctGGtatGCCAGTGGCTGAGAGAAGAGACTTCAAGAGAGTCTTCTCTCAGCCACTGGATTTTTGct  
cgagctggcgaattcc  
>CD\_NM\_006500.2:174

CgCtGcgagtctGGtatGACCTCTCCCAGTCCCAAGGCAATTCAAGAGATTGCCTTGGGACTGGGAGAGGCTTTTTTGct  
cgagctggcgaattcc  
>CD\_NM\_006500.2:1366  
CgCtGcgagtctGGtatGAGTGTGAATCTGTCTTGTGAATTCAGAGATTCACAAGACAGATTCAACACCTTTTTTGct  
cgagctggcgaattcc  
>CD\_NM\_006500.2:1049  
CgCtGcgagtctGGtatGCACTATGTGTCTGACGTCCGAGTTCAAGAGACTCGGACGTCAGACACATAGTTTTTTTGct  
cgagctggcgaattcc  
>CD\_NM\_006500.2:795  
CgCtGcgagtctGGtatGCGGAGCCCGTGGGAATGCTGAATTCAGAGATTCAGCATTCCCACGGGCTCCATTTTTTGct  
cgagctggcgaattcc  
>CD\_NM\_001728:937  
CgCtGcgagtctGGtatGCGGGCCGGTCAGAGCTACACATTTCAAGAGAATGTGTAGCTCTGACCGGCCCTTTTTTGct  
cgagctggcgaattcc  
>CD\_NM\_001728:1147  
CgCtGcgagtctGGtatGCGCCCGAGGACGTCTGGATGATTCAAGAGATCATCCAGGACGTCTCGGGCTTTTTTGct  
cgagctggcgaattcc  
>CD\_NM\_001728:1201  
CgCtGcgagtctGGtatGACGGGCAGCACCAGAATGACAATTCAGAGATTGTCATTCTGGTGCTGCCCGCTTTTTTGct  
cgagctggcgaattcc  
>CD\_NM\_001728.2:1147  
CgCtGcgagtctGGtatGACCCGAGGACGTCTGGATGATTTCAAGAGAATCATCCAGGACGTCTCGGGCTTTTTTGct  
cgagctggcgaattcc  
>CD\_NM\_001728.2:555  
CgCtGcgagtctGGtatGCACTCCTCACCTGCTCCTTGAATTCAGAGATTCAGGAGCAGGTGAGGAGTATTTTTTGct  
cgagctggcgaattcc  
>CD\_NM\_001728.2:906  
CgCtGcgagtctGGtatGACGAGAGCAGGTTCTTCGTGAGTTCAAGAGACTCACGAAGAACCTGCTCTCGGTTTTTGct  
cgagctggcgaattcc  
>CD\_NM\_001728.2:849  
CgCtGcgagtctGGtatGATGACTGGGCCTGGTACAAGATTTCAAGAGAATCTTGTACCAGGCCAGTCAGTTTTTGct  
cgagctggcgaattcc  
>CD\_NM\_001728.2:955  
CgCtGcgagtctGGtatGAATTGAGAACCTGAACATGGAGTTCAAGAGACTCCATGTTTCAGGTTCTCAATGTTTTTGct  
cgagctggcgaattcc  
>CD\_NM\_001728.2:891  
CgCtGcgagtctGGtatGACCTCATGAACGGCTCCGAGAGTTCAAGAGACTCTCGGAGCCGTTTCATGAGGGTTTTTGct  
cgagctggcgaattcc  
>CD\_NM\_001728.2:943  
CgCtGcgagtctGGtatGATCAGAGCTACACATTGAGAACTTCAAGAGAGTTCTCAATGTGTAGCTCTGACTTTTTTGct  
cgagctggcgaattcc  
>CD\_NM\_001728.2:805  
CgCtGcgagtctGGtatGAACGGCCATGCTGGTCTGCAAGTTCAAGAGACTTGCAGACCAGCATGGCCGTCTTTTTTGct  
cgagctggcgaattcc  
>CD\_NM\_001728.2:211  
CgCtGcgagtctGGtatGAAGTGTGGAGCTGCACTGCGAGTTCAAGAGACTCGCAGTGCAGCTCCACACTGTTTTTGct  
cgagctggcgaattcc  
>CD\_NM\_001728.2:379  
CgCtGcgagtctGGtatGAATCGACACGCTCGTGGAGGAGTTCAAGAGACTCCTCCACGAGCGTGTGATGTTTTTGct  
cgagctggcgaattcc  
>CD\_NM\_001728.2:949  
CgCtGcgagtctGGtatGACTACACATTGAGAACTTCAAGAGAGTTTCAGGTTCTCAATGTGTAGCTTTTTTGct  
cgagctggcgaattcc  
>CD\_NM\_001728.2:754



CgCtGcgagtctGGtatGACCTCCCAGAGTGAAGGCTGTGTTCAAGAGACACAGCCTTCACTCTGGGAGGCTTTTTGct  
cgagctggcgaattcc  
>CD\_NM\_001728.2:1201  
CgCtGcgagtctGGtatGAGGGCAGCACCAGAATGACAAATTCAGAGATTTGTCATTCTGGTGCTGCCGTTTTGct  
cgagctggcgaattcc  
>CD\_NM\_001728.2:826  
CgCtGcgagtctGGtatGATCAGAGTCCGTGCCACCTGTCTTCAAGAGAGACAGGTGGCACGGACTCTGACTTTTTGct  
cgagctggcgaattcc  
>CD\_NM\_001728.2:1207  
CgCtGcgagtctGGtatGACACCAGAATGACAAAGGCAAGTTCAAGAGACTTGCCTTTGTTCATTCTGGTGCTTTTTGct  
cgagctggcgaattcc  
>CD\_NM\_001728.2:484  
CgCtGcgagtctGGtatGAGCCCAGGCAGTCGTGCTAGTCTTCAAGAGAGACTAGCACGACTGCCTGGGCGTTTTGct  
cgagctggcgaattcc  
>CD\_NM\_001728.2:619  
CgCtGcgagtctGGtatGAGGCGTGGTGCTGAAGGAGGACTTCAAGAGAGTCCCTCCTCAGCACCACGCCTTTTGct  
cgagctggcgaattcc  
>CD\_NM\_001728.2:366  
CgCtGcgagtctGGtatGACAGCACCATCTCCATCGACACTTCAAGAGAGTGTGATGGAGATGGTGCTGGTTTTGct  
cgagctggcgaattcc  
>CD\_NM\_001728.2:515  
CgCtGcgagtctGGtatGAGCACAGTCTTCACTACCGTAGTTCAAGAGACTACGGTAGTGAAGACTGTGCCTTTTTGct  
cgagctggcgaattcc  
>CD\_NM\_001728.2:730  
CgCtGcgagtctGGtatGAACGGCCAACATCCAGCTCCACTTCAAGAGAGTGGAGCTGGATGTTGGCCGTTTTTGct  
cgagctggcgaattcc  
>CD\_NM\_001728.2:987  
CgCtGcgagtctGGtatGACCAGTACCGGTGCAACGGCACTTCAAGAGAGTCCGTTGCACCGGACTGGCTTTTTGct  
cgagctggcgaattcc  
>CD\_NM\_001728.2:1114  
CgCtGcgagtctGGtatGAACCATCATCTTCATCTACGAGTTCAAGAGACTCGTAGATGAAGATGATGGTGTTTTTGct  
cgagctggcgaattcc  
>CD\_NM\_001728.2:1002  
CgCtGcgagtctGGtatGCCGGCACCAGTCCAAGGGCTCTTCAAGAGAGAGCCCTTGAGCTGGTGCCGTTTTGct  
cgagctggcgaattcc  
>CD\_NM\_001728.2:1108  
CgCtGcgagtctGGtatGACTGGTCACCATCATCTTCATCTTCAAGAGAGATGAAGATGATGGTGACCAGTTTTGct  
cgagctggcgaattcc  
>CD\_NM\_001728.2:1078  
CgCtGcgagtctGGtatGATTCTGGGCATCGTGGCTGAGTTCAAGAGACTCAGCCACGATGCCAGGAAGTTTTGct  
cgagctggcgaattcc  
>CD\_NM\_001728.2:1110  
CgCtGcgagtctGGtatGCGGTCACCATCATCTTCATCTATTCAAGAGATAGATGAAGATGATGGTGACCATTTTTGct  
cgagctggcgaattcc  
>CD\_NM\_001728.2:769  
CgCtGcgagtctGGtatGAGCTGTGAAGTCGTCAGAACACTTCAAGAGAGTGTCTGACGACTTACAGCCTTTTTGct  
cgagctggcgaattcc  
>CD\_NM\_001728.2:1093  
CgCtGcgagtctGGtatGAGCTGAGGTGCTGGTGCTGGTCTTCAAGAGAGACCAGCACCAGCACCTCAGCCTTTTTGct  
cgagctggcgaattcc  
>CD\_NM\_001728.2:869  
CgCtGcgagtctGGtatGCTCACTGACTCTGAGGACAAGGTTCAAGAGACCTTGTCTCAGAGTCAGTGATTTTTGct  
cgagctggcgaattcc  
>CD\_NM\_001728.2:847

CgCctGcgagtctGGtatGAACTGACTGGGCCCTGGTACAAGTTCAAGAGACTTGTACCAGGCCAGTCAGTGTTTTTGct  
cgagctggcgaattcc  
>CD\_NM\_002843:1163  
CgCctGcgagtctGGtatGCCCCGTATCTTCTACAATCAAATTTCAAGAGATTTGATTGTAGAAGATACGGTTTTTTTTGct  
cgagctggcgaattcc  
>CD\_NM\_002843:1423  
CgCctGcgagtctGGtatGAAGGCCATAGAGTTCAGGACAATTTCAAGAGATTTGTCCTGAACTCTATGGCCTGTTTTTGct  
cgagctggcgaattcc  
>CD\_NM\_002843:1823  
CgCctGcgagtctGGtatGATGGCAATTTCTCGGGTAGAAATTTCAAGAGAATTTCTACCCGAGAATTGCCAGTTTTTTGct  
cgagctggcgaattcc  
>CD\_NM\_002843:2225  
CgCctGcgagtctGGtatGAGCCCAGCAATGTGTCCAACATTTCAAGAGAATGTTGGACACATTGCTGGGCCTTTTTGct  
cgagctggcgaattcc  
>CD\_NM\_002843:2682  
CgCctGcgagtctGGtatGCACGGAAGTCACGTATTTGAATTTCAAGAGAATTTCAAATACGTGACTTCCGTTTTTTTTGct  
cgagctggcgaattcc  
>CD\_NM\_002843:4321  
CgCctGcgagtctGGtatGACGCCGTGACCACATTTGGAATTTCAAGAGATTTCAAATGTGGTCACGGGCGTTTTTTGct  
cgagctggcgaattcc  
>CD\_NM\_002843.2:1644  
CgCctGcgagtctGGtatGCTCACAGTGTGTCCTGTCTAGTTCAAGAGACTAGGACAGGACACACTGTGATTTTTTTGct  
cgagctggcgaattcc  
>CD\_NM\_002843.2:2394  
CgCctGcgagtctGGtatGACTACAGTCACTGAATTAATACTTTCAAGAGAGTATTAATTCAGTGACTGTAGCTTTTTTTGct  
cgagctggcgaattcc  
>CD\_NM\_002843.2:1942  
CgCctGcgagtctGGtatGATCGGACAGTTTGAATAGAATTTCAAGAGAGTTCTATTGCAAACGTCCGAGTTTTTTGct  
cgagctggcgaattcc  
>CD\_NM\_002843.2:575  
CgCctGcgagtctGGtatGCACACCTCAGGTGGAACAACTTTCAAGAGAGTTTGTTCACCTGAGGTGTTTTTTTGct  
cgagctggcgaattcc  
>CD\_NM\_002843.2:1490  
CgCctGcgagtctGGtatGCAGCCTGACCCTGATCTGGAAATTTCAAGAGATTTCCAGATCAGGGTCAGGCTTTTTTTGct  
cgagctggcgaattcc  
>CD\_NM\_002843.2:2048  
CgCctGcgagtctGGtatGCTCCGAGTATGTCCTACCATTTATTCAAGAGATAAATGGTAGACATACTCGGAATTTTTTTGct  
cgagctggcgaattcc  
>CD\_NM\_002843.2:2936  
CgCctGcgagtctGGtatGCTCTGCAGATGTCCTGAAATACTTTCAAGAGAGTATTTCCAGGACATCTGCAGAATTTTTTTGct  
cgagctggcgaattcc  
>CD\_NM\_002843.2:3548  
CgCctGcgagtctGGtatGCGGAAAGAATCGCTATAATAATTTCAAGAGAATTTATTATAGCGATTCTTTCCTTTTTTTGct  
cgagctggcgaattcc  
>CD\_NM\_002843.2:3322  
CgCctGcgagtctGGtatGAAGGCTTCATCTTCTGGAGAAATTTCAAGAGATTTCTCCAGAAGATGAAGCCTTTTTTTGct  
cgagctggcgaattcc  
>CD\_NM\_002843.2:3749  
CgCctGcgagtctGGtatGCGCCATCATTATGTTGACTAAATTTCAAGAGATTTAGTCAACATAATGATGGCATTTTTTTTGct  
cgagctggcgaattcc  
>CD\_NM\_002843.2:3844  
CgCctGcgagtctGGtatGATGTGGCAATGACATCAGAAATTTCAAGAGAATTTCTGATGTCATTGCCACAGTTTTTTGct  
cgagctggcgaattcc  
>CD\_NM\_002843.2:2479

CgCctGcgagtctGGtatGATGGCCGGAAGTCATTCTGTACTTCAAGAGAGTACAGAATGACTTCCGGCCAGTTTTTgct  
cgagctggcgaattcc  
>CD\_NM\_002843.2:708  
CgCctGcgagtctGGtatGCGTCTGTGTTGACATTAAGTTCAAGAGACTTTAATGTCAAACACAGGACTTTTTTgct  
cgagctggcgaattcc  
>CD\_NM\_002843.2:2657  
CgCctGcgagtctGGtatGATCTGAGAATGGCACTGAGTATTTCAAGAGAATACTCAGTGCCATTCTCAGAGTTTTTgct  
cgagctggcgaattcc  
>CD\_NM\_002843.2:3087  
CgCctGcgagtctGGtatGCCACACTTGGTTATTACAATGTTCAAGAGACATTGTAATAACCAAGTGTGGTTTTTgct  
cgagctggcgaattcc  
>CD\_NM\_002843.2:1568  
CgCctGcgagtctGGtatGAACAGATTCTTCCAATCTCAACTTCAAGAGAGTTGAGATTGGAAGAATCTGCTTTTTTgct  
cgagctggcgaattcc  
>CD\_NM\_002843.2:4139  
CgCctGcgagtctGGtatGAACCGTGGATGTGTATGGGATTTTCAAGAGAAATCCCATACACATCCACGGTGTTTTTgct  
cgagctggcgaattcc  
>CD\_NM\_002843.2:2982  
CgCctGcgagtctGGtatGACCTCAGATACTTATGTGACATTTCAAGAGAATGTCACATAAGTATCTGAGGCTTTTTgct  
cgagctggcgaattcc  
>CD\_NM\_002843.2:2429  
CgCctGcgagtctGGtatGAACAGTGGAGATCTTTCACAAATTTCAAGAGATTGTGCAAAGATCTCCACTGTTTTTgct  
cgagctggcgaattcc  
>CD\_NM\_002843.2:4103  
CgCctGcgagtctGGtatGAATTGATCGTCTCATCTACCAGTTCAAGAGACTGGTAGATGAGACGATCAATGTTTTTgct  
cgagctggcgaattcc  
>CD\_NM\_002843.2:1423  
CgCctGcgagtctGGtatGCGGCCATAGAGTTCAGGACAAATTTCAAGAGATTTGTCCTGAACTCTATGGCCTTTTTTgct  
cgagctggcgaattcc  
>CD\_NM\_002843.2:833  
CgCctGcgagtctGGtatGAACAATTACTGTTGTGCATCAATTTCAAGAGATTGATGCACAACAGTAATTGCTTTTTTgct  
cgagctggcgaattcc  
>CD\_NM\_002843.2:2140  
CgCctGcgagtctGGtatGCTCCGGGCACCTTATATAACATTTCAAGAGAATGTTATATAAGGTGCCCGGAATTTTTTgct  
cgagctggcgaattcc  
>CD\_NM\_002843.2:3980  
CgCctGcgagtctGGtatGAACCACTGACCTGCTCATCAACTTCAAGAGAGTTGATGAGCAGGTCAGTGGTGTTTTTgct  
cgagctggcgaattcc  
>CD\_NM\_002843.2:2095  
CgCctGcgagtctGGtatGCCACACAAGCACGTATGACAATTTCAAGAGATTGTCATACGTGCTTGTGTGGTTTTTgct  
cgagctggcgaattcc  
>CD\_NM\_002843.2:2315  
CgCctGcgagtctGGtatGATCCTACTGCCTTCTTATTGAGTTCAAGAGACTCAATAAGAAGGCAGTAGGAGTTTTTgct  
cgagctggcgaattcc  
>CD\_NM\_002843.2:2728  
CgCctGcgagtctGGtatGCCACCACTGTGTCCGTGGAAATTTCAAGAGATTTCCACAGGACACAGTGGTGATTTTTgct  
cgagctggcgaattcc  
>CD\_NM\_003037:212  
CgCctGcgagtctGGtatGAGGCGCATGATGAACTGCCCAATTTCAAGAGATTGGGCAGTTCATCATGCGCCTTTTTgct  
cgagctggcgaattcc  
>CD\_NM\_003037:307  
CgCctGcgagtctGGtatGCAGCATCCACATTGTCGTACATTTCAAGAGATGTGACGACAATGTGGATGCTTTTTTgct  
cgagctggcgaattcc  
>CD\_NM\_003037:990

CgCctGcgagtctGGtatGCACCAGGTCTCTTCAGAAGAATTCAAGAGATTCTTCTGAAGAGGACCTGGTTTTTTTTGct  
cgagctggcgaattcc  
>CD\_NM\_003037.1:1072  
CgCctGcgagtctGGtatGATCCCAGAGTCTGTCCAGGAAATTCAAGAGATTTCTTCTGGACAGACTCTGGGACTTTTTGct  
cgagctggcgaattcc  
>CD\_NM\_003037.1:990  
CgCctGcgagtctGGtatGCCAGGTCTCTTCAGAAGAATTCAAGAGATTTCTTCTGAAGAGGACCTGGTTTTTTTTGct  
cgagctggcgaattcc  
>CD\_NM\_003037.1:309  
CgCctGcgagtctGGtatGAATCCACATTGTTCGTCACAATGTTCAAGAGACATTGTGACGACAATGTGGATGTTTTTTGct  
cgagctggcgaattcc  
>CD\_NM\_003037.1:167  
CgCctGcgagtctGGtatGCGCTGTTTCTCTCCCTGGCTTTTTCAAGAGAAAAGCCAGGGAGAGAAAACAGCATTTTTTGct  
cgagctggcgaattcc  
>CD\_NM\_003037.1:525  
CgCctGcgagtctGGtatGCTGCCTGCAGTTGAGGCTTTATTTCAAGAGAATAAAGCCTCAACTGCAGGCAATTTTTGct  
cgagctggcgaattcc  
>CD\_NM\_003037.1:367  
CgCctGcgagtctGGtatGATGTCTCTTGATCCATCCGAAGTTCAAGAGACTTCGGATGGATCAAGAGACACTTTTTGct  
cgagctggcgaattcc  
>CD\_NM\_003037.1:870  
CgCctGcgagtctGGtatGAGGTGTCATCATGATTCTCATCTTCAAGAGAGATGAGAATCATGATGACACCCTTTTTGct  
cgagctggcgaattcc  
>CD\_NM\_003037.1:1092  
CgCctGcgagtctGGtatGCACAAATTCATCACAGTCTATTTCAAGAGAATAGACTGTGATGGAATTTGTTTTTTTTGct  
cgagctggcgaattcc  
>CD\_NM\_003037.1:391  
CgCctGcgagtctGGtatGAGCCCTCCACGTTATCTAGGAGTTCAAGAGACTCCTAGATAACGTGGAGGGCCTTTTTGct  
cgagctggcgaattcc  
>CD\_NM\_003037.1:204  
CgCctGcgagtctGGtatGCACAGGTGGGCGCATGATGAACTTCAAGAGAGTTCATCATGCGCCCACCTGTTTTTTTTGct  
cgagctggcgaattcc  
>CD\_NM\_003037.1:1045  
CgCctGcgagtctGGtatGCCCATATATGTTGCTGCCACAGTTCAAGAGACTGTGGCAGCAACATATATGTTTTTTTTGct  
cgagctggcgaattcc  
>CD\_NM\_003037.1:238  
CgCctGcgagtctGGtatGATCCGGCAGTTGGGAAGCAAAGTTCAAGAGACTTTGCTTCCCAACTGCCGGAGTTTTTTGct  
cgagctggcgaattcc  
>CD\_NM\_003037.1:996  
CgCctGcgagtctGGtatGCCCTCTTCAGAAGAACTTGACTTCAAGAGAGTCAAGTTTCTTCTGAAGAGGATTTTTGct  
cgagctggcgaattcc  
>CD\_NM\_003037.1:285  
CgCctGcgagtctGGtatGAATAAATAAGAGCATGAACAAATTCAAGAGATTTGTTTCATGCTCTTATTTATCTTTTTGct  
cgagctggcgaattcc  
>CD\_NM\_003037.1:905  
CgCctGcgagtctGGtatGCACAGTTGAGAAGAAGAGGTAATTCAAGAGATTACCTCTTCTTCTCAACTGTATTTTTGct  
cgagctggcgaattcc  
>CD\_NM\_003037.1:551  
CgCctGcgagtctGGtatGCGGTCTCCACTCCAGAAATTAATTCAAGAGATTAATTTCTGGAGTGGAGACCTTTTTTTGct  
cgagctggcgaattcc  
>CD\_NM\_003037.1:960  
CgCctGcgagtctGGtatGCAGCCTTACGATCTATGCCCAATTCAAGAGATTGGGCATAGATCGTAAGGCTTTTTTTTTGct  
cgagctggcgaattcc  
>CD\_NM\_003037.1:765

CgCctGcgagtctGGtatGAAGCAACCCATCAGCAACAATTTCAAGAGAATTGTTGCTGATAGGGTTGCTCTTTTTTGct  
cgagctggcgaattcc  
>CD\_NM\_003037.1:882  
CgCctGcgagtctGGtatGAATTCTCATCATGGTGGTAATATTCAAGAGATATTACCACCATGATGAGAATCTTTTTTGct  
cgagctggcgaattcc  
>CD\_NM\_003037.1:228  
CgCctGcgagtctGGtatGACCAAAGATTCTCCGGCAGTTGTTCAAGAGACAACTGCCGGAGAATCTTTGGGTTTTTGct  
cgagctggcgaattcc  
>CD\_NM\_003037.1:1078  
CgCctGcgagtctGGtatGAAGTCTGTCCAGGAAACAAATTTTCAAGAGAAATTTGTTTCCTGGACAGACTCTTTTTTGct  
cgagctggcgaattcc  
>CD\_NM\_003037.1:1102  
CgCctGcgagtctGGtatGCTCACAGTCTATGCTAGTGTGATTCAAGAGATCACACTAGCATAGACTGTGATTTTTTGct  
cgagctggcgaattcc  
>CD\_NM\_003037.1:966  
CgCctGcgagtctGGtatGCACGATCTATGCCCAAGTCCAGTTCAAGAGACTGGACTTGGGCATAGATCGTATTTTTTGct  
cgagctggcgaattcc  
>CD\_NM\_003037.1:740  
CgCctGcgagtctGGtatGATGACAATATCTACATCTGCACTTCAAGAGAGTGCAGATGTAGATATTGTCAGTTTTTGct  
cgagctggcgaattcc  
>CD\_NM\_003037.1:1074  
CgCctGcgagtctGGtatGACCAGAGTCTGTCCAGGAAACATTTCAAGAGATGTTTCCTGGACAGACTCTGGGTTTTTGct  
cgagctggcgaattcc  
>CD\_NM\_003037.1:876  
CgCctGcgagtctGGtatGAATCATGATTCTCATCATGGTGTTCAGAGACACCATGATGAGAATCATGATGTTTTTGct  
cgagctggcgaattcc  
>CD\_NM\_003037.1:893  
CgCctGcgagtctGGtatGCGGTGGTAATACTACAGTTGAGTTCAAGAGACTCAACTGTAGTATTACCACCATTTTTTGct  
cgagctggcgaattcc  
>CD\_NM\_003037.1:1011  
CgCctGcgagtctGGtatGCCTTACTCCTTCCAGCTCAGTTCAAGAGACTGAGCTGGGAAGGAGTCAAGTTTTTTGct  
cgagctggcgaattcc  
>CD\_NM\_003037.1:761  
CgCctGcgagtctGGtatGACGTGAGCAACCCATCAGCAATTTCAAGAGATTGCTGATAGGGTTGCTCACGGTTTTTGct  
cgagctggcgaattcc  
>CD\_NM\_003037.1:482  
CgCctGcgagtctGGtatGAGTACCTTATGACCCTGGAGAATTTCAAGAGATTCTCCAGGGTCATAAGGTACCTTTTTTGct  
cgagctggcgaattcc  
>CD\_NM\_004357:704  
CgCctGcgagtctGGtatGAAGACCATGCCTCCAACATCTATTCAAGAGATAGATGTTGGAGGCATGGTCTCTTTTTTGct  
cgagctggcgaattcc  
>CD\_NM\_004357:466  
CgCctGcgagtctGGtatGAAGCAGCTGAACACGGAGCTCATTCAAGAGATGAGCTCCGTGTTTCAGCTGCTGTTTTTGct  
cgagctggcgaattcc  
>CD\_NM\_004357:730  
CgCctGcgagtctGGtatGATGGAGGGCGGCTGCATCACCATTCAAGAGATGGTGTGATGCAGCCGCCCTCCACTTTTTTGct  
cgagctggcgaattcc  
>CD\_NM\_004357:175  
CgCctGcgagtctGGtatGATGCTGTTTACCTACAATTGCTTTTCAAGAGAAGCAATTGTAGGTAAACAGCAGTTTTTGct  
cgagctggcgaattcc  
>CD\_NM\_004357:455  
CgCctGcgagtctGGtatGCCGCTACTACCAGCAGCTGAATTTCAAGAGATTGAGCTGCTGGTAGTAGGCGTTTTTTGct  
cgagctggcgaattcc  
>CD\_NM\_004357:499

CgCtGcgagtctGGtatGCAGGACACCATGACCAAGCGCTTTCAAGAGAAGCGCTTGGTCATGGTGTCTTTTTTTGct  
cgagctggcgaattcc  
>CD\_NM\_004357:382  
CgCtGcgagtctGGtatGCACCTGCTGCGCCTGTACTTCATTCAAGAGATGAAGTACAGGCGCAGCAGGTTTTTTTgct  
cgagctggcgaattcc  
>CD\_NM\_004357.3:857  
CgCtGcgagtctGGtatGAAGTCTCAAGCTGGAGCACTACTTCAAGAGAGTAGTGCTCCAGCTTGAGACTCTTTTTTgct  
cgagctggcgaattcc  
>CD\_NM\_004357.3:571  
CgCtGcgagtctGGtatGCGGAGTTCCACTGCTGTGGCAGTTCAAGAGACTGCCACAGCAGTGGAACCTCTTTTTTgct  
cgagctggcgaattcc  
>CD\_NM\_004357.3:812  
CgCtGcgagtctGGtatGATGTGTGCAGGTCCTTGGCATGTTCAAGAGACATGCCAAAGACCTGCACACAGTTTTTgct  
cgagctggcgaattcc  
>CD\_NM\_004357.3:239  
CgCtGcgagtctGGtatGAACGCTGGCCCTCAAGAGTGACTTCAAGAGAGTCACTCTTGAGGGCCAGCGTCTTTTTTgct  
cgagctggcgaattcc  
>CD\_NM\_004357.3:209  
CgCtGcgagtctGGtatGCGGCCCTGGCTGTCATGGCAGTGTTCAAGAGACACTGCCATGACAGCCAGGCCATTTTTTgct  
cgagctggcgaattcc  
>CD\_NM\_004357.3:644  
CgCtGcgagtctGGtatGAGGTGGCCGTGTGGTCCCAGACTTCAAGAGAGTCTGGGACCACACGGCCACCGTTTTTgct  
cgagctggcgaattcc  
>CD\_NM\_004357.3:343  
CgCtGcgagtctGGtatGAGGTCTTGGGCTGCTGCGCCACTTCAAGAGAGTGGCGCAGCAGCCCAAGACCCTTTTTTgct  
cgagctggcgaattcc  
>CD\_NM\_004357.3:684  
CgCtGcgagtctGGtatGATGGCTCTTTGTGGACAGCGAGTTCAAGAGACTCGCTGTCCACAAAGAGCCACTTTTTTgct  
cgagctggcgaattcc  
>CD\_NM\_004357.3:434  
CgCtGcgagtctGGtatGAATCGCTGGTATCCTCGCCTACTTCAAGAGAGTAGGCGAGGATAACCAGCGATGTTTTTgct  
cgagctggcgaattcc  
>CD\_NM\_004357.3:806  
CgCtGcgagtctGGtatGAATTGCCTGTGTGCAGGTCTTTTTTCAAGAGAAAAGACCTGCACACAGGCAATGTTTTTgct  
cgagctggcgaattcc  
>CD\_NM\_004357.3:413  
CgCtGcgagtctGGtatGAATCATCTTTCTGCTGGAGATCTTCAAGAGAGATCTCCAGCAGAAAGATGATGTTTTTgct  
cgagctggcgaattcc  
>CD\_NM\_004357.3:319  
CgCtGcgagtctGGtatGAGGGCACTGTCGTCATGGTACTTCAAGAGAGTACCATGACGACAGTGCCCGTTTTTgct  
cgagctggcgaattcc  
>CD\_NM\_004357.3:317  
CgCtGcgagtctGGtatGAGCGGGCACTGTCGTCATGGTGTTCAGAGACACCATGACGACAGTGCCCGCTTTTTTgct  
cgagctggcgaattcc  
>CD\_NM\_004357.3:155  
CgCtGcgagtctGGtatGAACCGTTTGCCTCAAGTACCTGTTCAAGAGACAGGTACTTGAGGCAAACGGTGTTTTTTgct  
cgagctggcgaattcc  
>CD\_NM\_004357.3:389  
CgCtGcgagtctGGtatGACGCCTGTACTTCATCCTGCTCTTCAAGAGAGAGCAGGATGAAGTACAGGCGTTTTTTgct  
cgagctggcgaattcc  
>CD\_NM\_004357.3:752  
CgCtGcgagtctGGtatGATTGGAGACCTTCATCCAGGAGTTCAAGAGACTCCTGGATGAAGGTCTCCAACTTTTTgct  
cgagctggcgaattcc  
>CD\_NM\_004357.3:296

CgCtGcgagtctGGtatGAACAGCCTACATCCTGGTGGTGTTC AAGAGACACCACCAGGATGTAGGCTGTGTTTTTGct  
cgagctggcgaattcc  
>CD\_NM\_004357.3:374  
CgCtGcgagtctGGtatGACGTGGAACTGCTGCGCCTGTTC AAGAGACAGGCGCAGCAGGTTCCGACGTTTTTGct  
cgagctggcgaattcc  
>CD\_NM\_004357.3:730  
CgCtGcgagtctGGtatGCGGAGGGCGGCTGCATCACCAATTCAAGAGATTGGTGATGCAGCCGCCCTCCATTTTTTGct  
cgagctggcgaattcc  
>CD\_NM\_004357.3:845  
CgCtGcgagtctGGtatGATGCCTGTACAGGAGTCTCAAGTTCAAGAGACTTGAGACTCCTGTACAGGCAGTTTTTGct  
cgagctggcgaattcc  
>CD\_NM\_004357.3:554  
CgCtGcgagtctGGtatGCGTGGACCAGCTGCAGCAGGAGTTCAAGAGACTCCTGCTGCAGCTGGTCCACATTTTTTGct  
cgagctggcgaattcc  
>CD\_NM\_004357.3:455  
CgCtGcgagtctGGtatGAGCCTACTACCAGCAGCTGAACTTCAAGAGAGTTCAGCTGCTGGTAGTAGGCGTTTTTGct  
cgagctggcgaattcc  
>CD\_NM\_004357.3:401  
CgCtGcgagtctGGtatGAATCCTGCTCCTCATCATCTTTTTCAAGAGAAAAGATGATGAGGAGCAGGATTTTTTGct  
cgagctggcgaattcc  
>CD\_NM\_004357.3:551  
CgCtGcgagtctGGtatGAGCTGTGGACCAGCTGCAGCAGTTCAAGAGACTGCTGCAGCTGGTCCACAGCGTTTTTGct  
cgagctggcgaattcc  
>CD\_NM\_004357.3:141  
CgCtGcgagtctGGtatGCAGACAACATGTGGCACCGTTTTTCAAGAGAAAACGGTGCCACATGTTGCTTTTTTTTGct  
cgagctggcgaattcc  
>CD\_NM\_004357.3:826  
CgCtGcgagtctGGtatGCTGGCATGATCTTCACGTGCTGTTCAAGAGACAGCACGTGAAGATCATGCCAATTTTTTGct  
cgagctggcgaattcc  
>CD\_NM\_005214:384  
CgCtGcgagtctGGtatGCGGCTGACAGCCAGGTGACTGATTCAAGAGATCAGTCACCTGGCTGTCAGCCTTTTTTGct  
cgagctggcgaattcc  
>CD\_NM\_005214:315  
CgCtGcgagtctGGtatGCCGCCAGCTTTGTGTGTGAGTATTCAAGAGATACTCACACACAAAGCTGGCGATTTTTTGct  
cgagctggcgaattcc  
>CD\_NM\_005214.3:331  
CgCtGcgagtctGGtatGAAGTATGCATCTCCAGGCAAAGTTCAAGAGACTTTGCCTGGAGATGCATACTCTTTTTTGct  
cgagctggcgaattcc  
>CD\_NM\_005214.3:469  
CgCtGcgagtctGGtatGAGCACCTCCAGTGGAAATCAAGTTCAAGAGACTTGATTTCCACTGGAGGTGCCTTTTTGct  
cgagctggcgaattcc  
>CD\_NM\_005214.3:325  
CgCtGcgagtctGGtatGATGTGTGAGTATGCATCTCCAGTTCAAGAGACTGGAGATGCATACTCACACACTTTTTTGct  
cgagctggcgaattcc  
>CD\_NM\_005214.3:363  
CgCtGcgagtctGGtatGACGGGTGACAGTGCTTCGGCAGTTCAAGAGACTGCCGAAGCACTGTCACCCGGTTTTTGct  
cgagctggcgaattcc  
>CD\_NM\_005214.3:274  
CgCtGcgagtctGGtatGATGGCCCAGCTGCTGTGGTACTTCAAGAGAGTACCACAGCAGGCTGGGCCACTTTTTTGct  
cgagctggcgaattcc  
>CD\_NM\_005214.3:248  
CgCtGcgagtctGGtatGCCCTGTCTTCTGCAAAGCAATTTCAAGAGAATTGCTTTGCAGAAGACAGGGATTTTTTGct  
cgagctggcgaattcc  
>CD\_NM\_005214.3:319

CgCctGcgagtctGGtatGCGCTTTGTGTGTGAGTATGCATTTCAAGAGAATGCATACTCACACACAAAGCTTTTTTgct  
cgagctggcgaattcc  
>CD\_NM\_005214.3:601  
CgCctGcgagtctGGtatGCTTTATGTAATTGATCCAGAACTTCAAGAGAGTTCTGGATCAATTACATAAATTTTTTgct  
cgagctggcgaattcc  
>CD\_NM\_005214.3:633  
CgCctGcgagtctGGtatGCTCTGACTTCCCTCTGGATCTTCAAGAGAGATCCAGAGGAGGAAGTCAGAATTTTTTgct  
cgagctggcgaattcc  
>CD\_NM\_005214.3:452  
CgCctGcgagtctGGtatGCTGATTCCATCTGCACGGGCACTTCAAGAGAGTGCCCGTGCAGATGGAATCATTTTTTgct  
cgagctggcgaattcc  
>CD\_NM\_005214.3:575  
CgCctGcgagtctGGtatGCCCTGGGCATAGGCAACGGAACTTCAAGAGAGTTCCGTTGCCTATGCCAGGTTTTTgct  
cgagctggcgaattcc  
>CD\_NM\_005214.3:243  
CgCctGcgagtctGGtatGATTCATCCCTGTCTTCTGCAAATTCAAGAGATTTGCAGAAGACAGGGATGAAGTTTTTgct  
cgagctggcgaattcc  
>CD\_NM\_005214.3:384  
CgCctGcgagtctGGtatGAGCTGACAGCCAGGTGACTGAATTCAAGAGATTCAGTCACCTGGCTGTCAGCCTTTTTTgct  
cgagctggcgaattcc  
>CD\_NM\_005214.3:594  
CgCctGcgagtctGGtatGCACCCAGATTTATGTAATTGATTTCAAGAGAATCAATTACATAAATCTGGGTTTTTTgct  
cgagctggcgaattcc  
>CD\_NM\_005214.3:369  
CgCctGcgagtctGGtatGAACAGTGCTTCGGCAGGCTGACTTCAAGAGAGTCAGCCTGCCGAAGCACTGTCTTTTTTgct  
cgagctggcgaattcc  
>CD\_NM\_005214.3:565  
CgCctGcgagtctGGtatGACGCCATACTACCTGGGCATAGTTCAAGAGACTATGCCAGGTAGTATGGCGGTTTTTgct  
cgagctggcgaattcc  
>CD\_NM\_005214.3:315  
CgCctGcgagtctGGtatGAGCCAGCTTTGTGTGTGAGTATTTCAAGAGAATACTCACACACAAAGCTGGCGTTTTTgct  
cgagctggcgaattcc  
>CD\_NM\_005214.3:404  
CgCctGcgagtctGGtatGCAGTCTGTGCGGCAACCTACATTTCAAGAGAATGTAGGTTGCCGCACAGACTTTTTTgct  
cgagctggcgaattcc  
>CD\_NM\_005214.3:177  
CgCctGcgagtctGGtatGACGGCACAAGGCTCAGCTGAACCTTCAAGAGAGTTCAGCTGAGCCTTGTGCCGTTTTTgct  
cgagctggcgaattcc  
>CD\_NM\_005214.3:486  
CgCctGcgagtctGGtatGCCAAGTGAACCTCACTATCCAATTCAAGAGATTGGATAGTGAGGTTCACTTGATTTTTTgct  
cgagctggcgaattcc  
>CD\_NM\_005214.3:249  
CgCctGcgagtctGGtatGACCTGTCTTCTGCAAAGCAATGTTCAAGAGACATTGCTTTGCAGAAGACAGGGTTTTTgct  
cgagctggcgaattcc  
>CD\_NM\_005214.3:494  
CgCctGcgagtctGGtatGCCCTCACTATCCAAGGACTGAGTTCAAGAGACTCAGTCCTTGGATAGTGAGGTTTTTgct  
cgagctggcgaattcc  
>CD\_NM\_005214.3:627  
CgCctGcgagtctGGtatGACCAGATTCTGACTTCCCTCTTCAAGAGAGAGGAGGAAGTCAGAATCTGGTTTTTgct  
cgagctggcgaattcc  
>CD\_NM\_005214.3:695  
CgCctGcgagtctGGtatGCCCTCACAGCTGTTTCTTTGAGTTCAAGAGACTCAAAGAAACAGCTGTGAGGATTTTTTgct  
cgagctggcgaattcc  
>CD\_NM\_005214.3:239



CgCctGcgagtctGGtatGCTCTCTTCATCCCTGTCTTCTGTTCAAGAGACAGAAGACAGGGATGAAGAGAATTTTTGct  
cgagctggcgaattcc  
>CD\_NM\_005214.3:699  
CgCctGcgagtctGGtatGAACAGCTGTTTCTTTGAGCAAATTC AAGAGATTTGCTCAAAGAAACAGCTGTGTTTTGct  
cgagctggcgaattcc  
>CD\_NM\_005214.3:772  
CgCctGcgagtctGGtatGACAACAGAGCCAGAATGTGAAATTC AAGAGATTTACATTCTGGCTCTGTTGGTTTTGct  
cgagctggcgaattcc  
>CD\_NM\_005214.3:585  
CgCctGcgagtctGGtatGCGGCAACGGAACCCAGATTTATTTCAAGAGAATAAATCTGGGTTCCGTTGCCTTTTTGct  
cgagctggcgaattcc  
>CD\_NM\_005214.3:391  
CgCctGcgagtctGGtatGCGCCAGGTGACTGAAGTCTGTGTTCAAGAGACACAGACTTCAGTCACCTGGCTTTTTGct  
cgagctggcgaattcc  
>CD\_NM\_005214.3:380  
CgCctGcgagtctGGtatGAGCAGGCTGACAGCCAGGTGACTTCAAGAGAGTCCCTGGCTGTCAGCTGCCTTTTTGct  
cgagctggcgaattcc  
>CD\_NM\_005214.3:590  
CgCctGcgagtctGGtatGCCGGAACCCAGATTTATGTAATTTCAAGAGAATTACATAAATCTGGGTTCCGTTTTGct  
cgagctggcgaattcc  
>CD\_NM\_001244:286  
CgCctGcgagtctGGtatGAACGAGCCGCAGCTATTTCTATTTCAAGAGAATAGAAATAGCTGCGGCTCGTTTTTGct  
cgagctggcgaattcc  
>CD\_NM\_001244:541  
CgCctGcgagtctGGtatGCGGCATTCTCCATGGAGTCAGATTC AAGAGATCTGACTCCATGGAGAATGCCATTTTTGct  
cgagctggcgaattcc  
>CD\_NM\_001244:591  
CgCctGcgagtctGGtatGCCCTGGTTGTACTTCATCATTTCAAGAGAATGATGAAGTACAAACCAGGGATTTTTGct  
cgagctggcgaattcc  
>CD\_NM\_001244:668  
CgCctGcgagtctGGtatGAAGCTTCTCATCAACAAGCATATTC AAGAGATATGCTTGTTGATGAGAAGCTTTTTGct  
cgagctggcgaattcc  
>CD\_NM\_001244:793  
CgCctGcgagtctGGtatGAACCATATCAGTCAATGTGGATTTCAAGAGAATCCACATTGACTGATATGGTGTTTTTGct  
cgagctggcgaattcc  
>CD\_NM\_001244.2:798  
CgCctGcgagtctGGtatGCTCAGTCAATGTGGATACATTCTTCAAGAGAGAATGTATCCACATTGACTGATTTTTGct  
cgagctggcgaattcc  
>CD\_NM\_001244.2:712  
CgCctGcgagtctGGtatGATGTGTGAGTCTGGAATGCAAATTC AAGAGATTTGCATTCCAGACTCACACACTTTTTGct  
cgagctggcgaattcc  
>CD\_NM\_001244.2:648  
CgCctGcgagtctGGtatGCTCTGTGATCTGAAGTTGGAGTTCAAGAGACTCCAACCTCAGATCGACAGAATTTTTGct  
cgagctggcgaattcc  
>CD\_NM\_001244.2:857  
CgCctGcgagtctGGtatGCGTTGTCCATCTTCTTATACAGTTCAAGAGACTGTATAAGAAGATGGACAACATTTTTGct  
cgagctggcgaattcc  
>CD\_NM\_001244.2:706  
CgCctGcgagtctGGtatGATGACAGTGTGTGAGTCTGGAATTC AAGAGATTCAGACTCACACACTGTCACTTTTGct  
cgagctggcgaattcc  
>CD\_NM\_001244.2:860  
CgCctGcgagtctGGtatGCGTCCATCTTCTTATACAGTAATTC AAGAGATTACTGTATAAGAAGATGGACATTTTTGct  
cgagctggcgaattcc  
>CD\_NM\_001244.2:846

CgCctGcgagtctGGtatGCCTTGAGAAATGTGTTGTCCATCTTCAAGAGAGATGGACAACACATTCTCAAGATTTTTGct  
cgagctggcgaattcc  
>CD\_NM\_001244.2:663  
CgCctGcgagtctGGtatGATTGGAGCTTCTCATCAACAAGTTCAAGAGACTTGTGATGAGAAGCTCCAACTTTTGct  
cgagctggcgaattcc  
>CD\_NM\_001244.2:768  
CgCctGcgagtctGGtatGACTGGATTACCTGCAGGTCAACTTCAAGAGAGTTGACCTGCAGGTAATCCAGCTTTTTGct  
cgagctggcgaattcc  
>CD\_NM\_001244.2:872  
CgCctGcgagtctGGtatGCATACAGTAATTCAGACTGAACTTCAAGAGAGTTCAGTCTGAATTACTGTATATTTTTGct  
cgagctggcgaattcc  
>CD\_NM\_001244.2:432  
CgCctGcgagtctGGtatGATCAGAAGACCTCTTATGTATCTTCAAGAGAGATACATAAGAGGTCTTCTGAGTTTTGct  
cgagctggcgaattcc  
>CD\_NM\_001244.2:835  
CgCctGcgagtctGGtatGCGCACCTTCTCTTGGAGAATGTTCAAGAGACATTCTCAAGAGGAAAGGTGCTTTTTGct  
cgagctggcgaattcc  
>CD\_NM\_001244.2:756  
CgCctGcgagtctGGtatGATCTCAATTCTTGCTGGATTACTTCAAGAGAGTAATCCAGCAAGAATTGAGAGTTTTGct  
cgagctggcgaattcc  
>CD\_NM\_001244.2:718  
CgCctGcgagtctGGtatGAAGTCTGGAATGCAAACGAACTTCAAGAGAGTTTCGTTTGCATTCCAGACTTTTTGct  
cgagctggcgaattcc  
>CD\_NM\_001244.2:517  
CgCctGcgagtctGGtatGCCCAAGTTGCTTGGAAACAAAGTTCAAGAGACTTTGTTCCAAGACAACCTTGGTTTTGct  
cgagctggcgaattcc  
>CD\_NM\_001244.2:437  
CgCctGcgagtctGGtatGCAGACCTCTTATGTATCTTGAATTCAGGATTCAGGATACATAAGAGGTCTTTTTGct  
cgagctggcgaattcc  
>CD\_NM\_001244.2:546  
CgCctGcgagtctGGtatGCCTCCATGGAGTCAGATATCAGTTCAAGAGACTGATATCTGACTCCATGGAGATTTTTGct  
cgagctggcgaattcc  
>CD\_NM\_001244.2:338  
CgCctGcgagtctGGtatGCCTTACGGTGGCCACTATTATTTCAAGAGAATAATAGTGGCCACCGTGAAGATTTTTGct  
cgagctggcgaattcc  
>CD\_NM\_001244.2:290  
CgCctGcgagtctGGtatGACCGCAGCTATTTCTATTTGACTTCAAGAGAGTCAAATAGAAATAGCTGCGGCTTTTTGct  
cgagctggcgaattcc  
>CD\_NM\_001244.2:556  
CgCctGcgagtctGGtatGATCAGATATCAGGATGGGAATCTTCAAGAGAGATTCATCCTGATATCTGACTTTTTGct  
cgagctggcgaattcc  
>CD\_NM\_001244.2:642  
CgCctGcgagtctGGtatGCAATAATTCTGTCGATCTGAAGTTCAAGAGACTTCAGATCGACAGAATTATTTTTGct  
cgagctggcgaattcc  
>CD\_NM\_001244.2:746  
CgCctGcgagtctGGtatGCCCAGAATCTCTCTCAATTCTTTTCAAGAGAAAGAATTGAGAGAGATTCTGGTTTTGct  
cgagctggcgaattcc  
>CD\_NM\_001244.2:567  
CgCctGcgagtctGGtatGAGATGGGAATCTGGTGATCCAATTCAGAGATTGGATCACCAGATTCATCCTTTTTGct  
cgagctggcgaattcc  
>CD\_NM\_001244.2:626  
CgCctGcgagtctGGtatGCTCTTGTACAATGCCAAATAATTCAAGAGATTATTTGGGCATTGTACAAGAATTTTTGct  
cgagctggcgaattcc  
>CD\_NM\_001244.2:628

CgCctGcgagtctGGtatGATTGTACAATGCCCAAATAATTTTCAAGAGAAATTATTTGGGCATTGTACAAGTTTTTGct  
cgagctggcgaattcc  
>CD\_NM\_001244.2:320  
CgCctGcgagtctGGtatGATCTGGCTCTGTGCCTTGTCTTTTCAAGAGAAAGACAAGGCACAGAGCCAGAGTTTTTGct  
cgagctggcgaattcc  
>CD\_NM\_001244.2:231  
CgCctGcgagtctGGtatGCGGAGACACAGCCATGCATGTGTTCAAGAGACACATGCATGGCTGTGTCTCCATTTTTTGct  
cgagctggcgaattcc  
>CD\_NM\_001244.2:744  
CgCctGcgagtctGGtatGCTACCAGAACTCTCTCAATTCTTCAAGAGAGAATTGAGAGAGATTCTGGTATTTTTTGct  
cgagctggcgaattcc  
>CD\_NM\_000074:770  
CgCctGcgagtctGGtatGAAGGTGCTTCGGTGTGTTGTCAATTCAAGAGATTGACAAACACCGAAGCACCTGTTTTTGct  
cgagctggcgaattcc  
>CD\_NM\_000074:430  
CgCctGcgagtctGGtatGACTCAAATTGCGGCACATGTCATTCAAGAGATGACATGTGCCGCAATTTGAGGTTTTTGct  
cgagctggcgaattcc  
>CD\_NM\_000074.2:621  
CgCctGcgagtctGGtatGCCGAGTCAAGCTCCATTTATAGTTCAAGAGACTATAAATGGAGCTTGACTCGATTTTTTGct  
cgagctggcgaattcc  
>CD\_NM\_000074.2:770  
CgCctGcgagtctGGtatGCGGTGCTTCGGTGTGTTGTCAATTTCAAGAGAATTGACAAACACCGAAGCACCTTTTTTGct  
cgagctggcgaattcc  
>CD\_NM\_000074.2:437  
CgCctGcgagtctGGtatGCGCGGCACATGTCATAAGTGAGTTCAAGAGACTCACTTATGACATGTGCCGCATTTTTTGct  
cgagctggcgaattcc  
>CD\_NM\_000074.2:225  
CgCctGcgagtctGGtatGCAGATAGAAGATGAAAGGAATCTTCAAGAGAGATTCCTTTCATCTTCTATCTTTTTTTGct  
cgagctggcgaattcc  
>CD\_NM\_000074.2:195  
CgCctGcgagtctGGtatGCTTGCTGTGTATCTTCATAGAATTCAAGAGATTCATGAAGATACACAGCAAATTTTTTGct  
cgagctggcgaattcc  
>CD\_NM\_000074.2:337  
CgCctGcgagtctGGtatGACCAGTTTGAAGGCTTTGTGAATTCAAGAGATTCACAAAGCCTTCAAACCTGGCTTTTTTGct  
cgagctggcgaattcc  
>CD\_NM\_000074.2:747  
CgCctGcgagtctGGtatGAGAGGAGTATTTGAATTGCAACTTCAAGAGAGTTGCAATTCAAATACTCCTCCTTTTTTGct  
cgagctggcgaattcc  
>CD\_NM\_000074.2:640  
CgCctGcgagtctGGtatGCAGCCAGCCTCTGCCTAAAGTCTTCAAGAGAGACTTTAGGCAGAGGCTGGCTATTTTTTGct  
cgagctggcgaattcc  
>CD\_NM\_000074.2:116  
CgCctGcgagtctGGtatGCGGACTGCCCATCAGCATGAAATTCAAGAGATTCATGCTGATGGGCAGTCCATTTTTTGct  
cgagctggcgaattcc  
>CD\_NM\_000074.2:500  
CgCctGcgagtctGGtatGCGGATACTACACCATGAGCAACTTCAAGAGAGTTGCTCATGGTGTAGTATCCTTTTTTTGct  
cgagctggcgaattcc  
>CD\_NM\_000074.2:563  
CgCctGcgagtctGGtatGCAGACAAGGACTCTATTATATCTTCAAGAGAGATATAATAGAGTCCTTGTCTTTTTTTGct  
cgagctggcgaattcc  
>CD\_NM\_000074.2:208  
CgCctGcgagtctGGtatGCTCATAGAAGGTTGGACAAGATTTCAAGAGAATCTTGTCCAACCTTCTATGAATTTTTTGct  
cgagctggcgaattcc  
>CD\_NM\_000074.2:823

CgCctGcgagtctGGtatGATGGCTTCACGTCCTTTGGCTTTTCAAGAGAAAGCCAAAGGACGTGAAGCCAGTTTTTgct  
cgagctggcgaattcc  
>CD\_NM\_000074.2:572  
CgCctGcgagtctGGtatGCCTCTATTATATCTATGCCCAATTC AAGAGATTGGGCATAGATATAATAGAGTTTTTgct  
cgagctggcgaattcc  
>CD\_NM\_000074.2:206  
CgCctGcgagtctGGtatGCCTTCATAGAAGGTTGGACAAGTTCAAGAGACTTGTCCAACCTTCTATGAAGATTTTTGct  
cgagctggcgaattcc  
>CD\_NM\_000074.2:638  
CgCctGcgagtctGGtatGCATAGCCAGCCTCTGCCTAAAGTTCAAGAGACTTTAGGCAGAGGCTGGCTATATTTTTGct  
cgagctggcgaattcc  
>CD\_NM\_000074.2:197  
CgCctGcgagtctGGtatGCGCTGTGTATCTTCATAGAAGGTTCAAGAGACCTTCTATGAAGATACACAGCATTTTTTGct  
cgagctggcgaattcc  
>CD\_NM\_000074.2:609  
CgCctGcgagtctGGtatGCATCGGGAAGCTTCGAGTCAAGTTCAAGAGACTTGA CT CGAAGCTTCCCGATTTTTTgct  
cgagctggcgaattcc  
>CD\_NM\_000074.2:567  
CgCctGcgagtctGGtatGAAAGGACTCTATTATATCTATGTTCAAGAGACATAGATATAATAGAGTCCTTGTTTTGct  
cgagctggcgaattcc  
>CD\_NM\_000074.2:830  
CgCctGcgagtctGGtatGAACGTCCCTTTGGCTTACTCAAATTC AAGAGATTTGAGTAAGCCAAAGGACGTGTTTTGct  
cgagctggcgaattcc  
>CD\_NM\_000074.2:703  
CgCctGcgagtctGGtatGACCACAGTTCCGCCAAACCTTGTTCAAGAGACAAGGTTTGGCGGAACTGTGGGTTTTGct  
cgagctggcgaattcc  
>CD\_NM\_000074.2:350  
CgCctGcgagtctGGtatGATTTGTGAAGGATATAATGTTATTCAAGAGATAACATTATATCCTTCACAAAGTTTTGct  
cgagctggcgaattcc  
>CD\_NM\_000074.2:735  
CgCctGcgagtctGGtatGCCATTCACTTGGGAGGAGTATTTCAAGAGAATACTCCTCCCAAGTGAATGGATTTTTGct  
cgagctggcgaattcc  
>CD\_NM\_000074.2:314  
CgCctGcgagtctGGtatGCCTGAACTGTGAGGAGATTAATTC AAGAGATTTAATCTCCTCACAGTTCAGTTTTTgct  
cgagctggcgaattcc  
>CD\_NM\_000074.2:344  
CgCctGcgagtctGGtatGCGAAGGCTTTGTGAAGGATATATTC AAGAGATATATCCTTCACAAAGCCTTCATTTTTGct  
cgagctggcgaattcc  
>CD\_NM\_000074.2:699  
CgCctGcgagtctGGtatGCATACCCACAGTTCCGCCAAACTTC AAGAGAGTTTGGCGGAACTGTGGGTATTTTTTgct  
cgagctggcgaattcc  
>CD\_NM\_000074.2:430  
CgCctGcgagtctGGtatGATCAAATTGCGGCACATGTCATTTCAAGAGAATGACATGTGCCGCAATTTGAGTTTTGct  
cgagctggcgaattcc  
>CD\_NM\_000074.2:589  
CgCctGcgagtctGGtatGACCAAGTCACCTTCTGTTCCAATTC AAGAGATTGGAACAGAAGGTGACTTGGGTTTTGct  
cgagctggcgaattcc  
>CD\_NM\_000074.2:417  
CgCctGcgagtctGGtatGAGTGATCAGAATCCTCAAATTTGTTCAAGAGACAATTTGAGGATTCTGATCACTTTTTgct  
cgagctggcgaattcc  
>CD\_NM\_000074.2:542  
CgCctGcgagtctGGtatGCGGGAACAGCTGACCGTTAAATTC AAGAGATTTAACGGTCAGCTGTTTCCATTTTTGct  
cgagctggcgaattcc  
>CD\_NM\_000074.2:681

CgCtGcgagtctGGtatGCTCTTACTCAGAGCTGCAAATATTCAAGAGATATTTGCAGCTCTGAGTAAGATTTTTTgct  
cgagctggcgaattcc  
>CD\_NM\_006505:1327  
CgCtGcgagtctGGtatGAAGCATGCCAGCGCCTCAGCTATTCAAGAGATAGCTGAGGCGCTGGCATGCTCTTTTTGct  
cgagctggcgaattcc  
>CD\_NM\_006505:1081  
CgCtGcgagtctGGtatGCAACCAATCAACACAACCTTAATTCAAGAGATTAAAGTTGTGTTGATTGGTTTTTTTTGct  
cgagctggcgaattcc  
>CD\_NM\_006505:1139  
CgCtGcgagtctGGtatGAAGAACTGACCGTCCAGGTCAATTCAAGAGATTGACCTGGACGGTCAGTTCTGTTTTTgct  
cgagctggcgaattcc  
>CD\_NM\_006505.2:872  
CgCtGcgagtctGGtatGAACTGTGAACCTCACCGTGTACTTCAAGAGAGTACACGGTGAGGTTACAGTCTTTTTGct  
cgagctggcgaattcc  
>CD\_NM\_006505.2:815  
CgCtGcgagtctGGtatGAGGCAAGAATGTGACCTGCAAGTTCAAGAGACTTGCAGGTCACATTCTTGCCGTTTTTgct  
cgagctggcgaattcc  
>CD\_NM\_006505.2:581  
CgCtGcgagtctGGtatGATGGCTCCGAGTGCTTGCCAAGTTCAAGAGACTTGGCAAGCACTCGGAGCCAGTTTTTgct  
cgagctggcgaattcc  
>CD\_NM\_006505.2:860  
CgCtGcgagtctGGtatGACCTCAGCTGCTGACTGTGAACTTCAAGAGAGTTCACAGTCAGCAGCTGAGGCTTTTTGct  
cgagctggcgaattcc  
>CD\_NM\_006505.2:1280  
CgCtGcgagtctGGtatGCTCCCGTGAGGTCCTTTGGCACTTCAAGAGAGTGCCAAAGGACCTCACGGGAATTTTTGct  
cgagctggcgaattcc  
>CD\_NM\_006505.2:420  
CgCtGcgagtctGGtatGACCAGCTATTCGGAGTCCAAACTTCAAGAGAGTTTGACTCCGAATAGCTGGGTTTTTgct  
cgagctggcgaattcc  
>CD\_NM\_006505.2:908  
CgCtGcgagtctGGtatGCTCCATCTCTGGCTATGATAACTTCAAGAGAGTTATCATAGCCAGAGATGGATTTTTTgct  
cgagctggcgaattcc  
>CD\_NM\_006505.2:299  
CgCtGcgagtctGGtatGATCCGTGACGCTGCCCTGCTACTTCAAGAGAGTAGCAGGGCAGCGTCACGGAGTTTTTgct  
cgagctggcgaattcc  
>CD\_NM\_006505.2:1093  
CgCtGcgagtctGGtatGAAACTTTAATCTGCAACGTCACCTTCAAGAGAGTGACGTTGCAGATTAAAGTTGTTTTTgct  
cgagctggcgaattcc  
>CD\_NM\_006505.2:1081  
CgCtGcgagtctGGtatGCACCAATCAACACAACCTTAATTTCAAGAGAATTAAAGTTGTGTTGATTGGTTTTTTTTGct  
cgagctggcgaattcc  
>CD\_NM\_006505.2:1293  
CgCtGcgagtctGGtatGATTTGGCACTGTCATCTGTGTCTTCAAGAGAGACACAGATGACAGTGCCAAAGTTTTTgct  
cgagctggcgaattcc  
>CD\_NM\_006505.2:1359  
CgCtGcgagtctGGtatGCCCTATTCAGCTGTGAGCAGAGTTCAAGAGACTCTGCTCACAGCTGAATAGGATTTTTGct  
cgagctggcgaattcc  
>CD\_NM\_006505.2:764  
CgCtGcgagtctGGtatGAACAGTCACTGTCACCAGCCTCTTCAAGAGAGAGGCTGGTGACAGTACTGTTTTTTgct  
cgagctggcgaattcc  
>CD\_NM\_006505.2:488  
CgCtGcgagtctGGtatGATCGCTGAGGATGTTGGGTTGTTCAAGAGACAACCCGAACATCTCAGCGAGTTTTTgct  
cgagctggcgaattcc  
>CD\_NM\_006505.2:1190

CgCtGcgagtctGGtatGATCCCGTAACGCCATCATCTTCTTCAAGAGAGAAGATGATGGCGTTACGGGACTTTTTTGct  
cgagctggcgaattcc  
>CD\_NM\_006505.2:912  
CgCtGcgagtctGGtatGCTCTCTGGCTATGATAACAACCTTCAAGAGAAGTTGTTATCATAGCCAGAGATTTTTTGct  
cgagctggcgaattcc  
>CD\_NM\_006505.2:1139  
CgCtGcgagtctGGtatGCGAACTGACCGTCCAGGTCAAATTCAGAGATTTGACCTGGACGGTCAGTCTTTTTTGct  
cgagctggcgaattcc  
>CD\_NM\_006505.2:907  
CgCtGcgagtctGGtatGCATCCATCTCTGGCTATGATAAATTCAGAGATTATCATAGCCAGAGATGGATATTTTTTGct  
cgagctggcgaattcc  
>CD\_NM\_006505.2:800  
CgCtGcgagtctGGtatGATCAAGCCAGGTGGACGGCAAGTTCAAGAGACTTGCCGTCCACCTGGCTTGAGTTTTTGct  
cgagctggcgaattcc  
>CD\_NM\_006505.2:988  
CgCtGcgagtctGGtatGCGCCCACAGGCTATAATTGGAGTTCAAGAGACTCCAATTATAGCCTGTGGGCTTTTTTGct  
cgagctggcgaattcc  
>CD\_NM\_006505.2:985  
CgCtGcgagtctGGtatGAAGAGCCCACAGGCTATAATTGTTCAAGAGACAATTATAGCCTGTGGGCTCTTTTTTGct  
cgagctggcgaattcc  
>CD\_NM\_006505.2:772  
CgCtGcgagtctGGtatGATGTCACCAGCCTCTGGATATTTTTCAAGAGAAATATCCAGAGGCTGGTGACAGTTTTTGct  
cgagctggcgaattcc  
>CD\_NM\_006505.2:559  
CgCtGcgagtctGGtatGCGGGCAGCAGGAGCGTGGATATTTCAAGAGAAATATCCACGCTCCTGTGCCCTTTTTTGct  
cgagctggcgaattcc  
>CD\_NM\_006505.2:614  
CgCtGcgagtctGGtatGCGCTGAGGTCAGAAGGTCCAGTTCAAGAGACTGGACCTTCTGAACCTCAGCTTTTTTGct  
cgagctggcgaattcc  
>CD\_NM\_006505.2:917  
CgCtGcgagtctGGtatGCGGCTATGATAACAACCTGGTACTTCAAGAGAGTACCAGTTGTTATCATAGCCATTTTTTGct  
cgagctggcgaattcc  
>CD\_NM\_006505.2:1257  
CgCtGcgagtctGGtatGCTTTATTTCTATTGGTCCAAATTTCAAGAGAATTTGGACCAATAGAAATAAATTTTTTGct  
cgagctggcgaattcc  
>CD\_NM\_006505.2:718  
CgCtGcgagtctGGtatGCGGGCGGGATGCCAATACGAGTTCAAGAGACTCGTATTGGGCATCCCGCCATTTTTTGct  
cgagctggcgaattcc  
>CD\_NM\_006505.2:475  
CgCtGcgagtctGGtatGCGCTGCGGAATGCCTCGCTGAGTTCAAGAGACTCAGCGAGGCATTCCGCAGCTTTTTTGct  
cgagctggcgaattcc  
>CD\_NM\_006505.2:827  
CgCtGcgagtctGGtatGAACCTGCAAGGTGGAGCACGAGTTCAAGAGACTCGTGCTCCACCTTGAGGTCTTTTTGct  
cgagctggcgaattcc  
>CD\_NM\_006505.2:1327  
CgCtGcgagtctGGtatGCGCATGCCAGCGCCTCAGCTAATTCAGAGATTAGCTGAGGCGCTGGCATGCTTTTTTGct  
cgagctggcgaattcc  
>CD\_NM\_001109:658  
CgCtGcgagtctGGtatGAAGCTGTATGTGGTCGTGGACATTCAGAGATGTCCACGACCACATACAGCTTTTTTGct  
cgagctggcgaattcc  
>CD\_NM\_001109:745  
CgCtGcgagtctGGtatGAACGTGGACAAGCTATATCAGATTCAAGAGATCTGATATAGCTTGCCACGTGTTTTTGct  
cgagctggcgaattcc  
>CD\_NM\_001109:1627

CgCctGcgagtctGGtatGACCGAGGAGTCCTGCTTCTCCTTTCAAGAGAAGGAGAAGCAGGACTCCTCGGCTTTTTTGct  
cgagctggcgaattcc  
>CD\_NM\_001109.2:2069  
CgCctGcgagtctGGtatGAAGGCATCATCGTCTACCGCAATTCAAGAGATTGCGGTAGACGATGATGCCTGTTTTTGct  
cgagctggcgaattcc  
>CD\_NM\_001109.2:1967  
CgCctGcgagtctGGtatGATGCGCGAAGCTGCTGACTGAGTTCAAGAGACTCAGTCAGCAGCTTCGCGCAGTTTTTGct  
cgagctggcgaattcc  
>CD\_NM\_001109.2:1280  
CgCctGcgagtctGGtatGATGTGGGAACCTGTTTGTGGAGTTCAAGAGACTCCACAAACAGGTTCCACACTTTTTTGct  
cgagctggcgaattcc  
>CD\_NM\_001109.2:1633  
CgCctGcgagtctGGtatGCGTCCTGCTTCTCCTATGACATTTCAAGAGAATGTCATAGGAGAAGCAGGACTTTTTTGct  
cgagctggcgaattcc  
>CD\_NM\_001109.2:254  
CgCctGcgagtctGGtatGAACCTCCACCTGCGGAAGAACTTCAAGAGAGTTCTTCCGCAGGTGGAGGGTTTTTTGct  
cgagctggcgaattcc  
>CD\_NM\_001109.2:644  
CgCctGcgagtctGGtatGAACCCGCTACGTGGAGCTGTATTTCAAGAGAATACAGCTCCACGTAGCGGGTCTTTTTTGct  
cgagctggcgaattcc  
>CD\_NM\_001109.2:1775  
CgCctGcgagtctGGtatGAACAGAGGATGGCACTGCGTATTTCAAGAGAATACGCAGTGCCATCCTCTGTGTTTTTGct  
cgagctggcgaattcc  
>CD\_NM\_001109.2:890  
CgCctGcgagtctGGtatGCCGGCGGCACCTGCATGACAACCTTCAAGAGAGTTGTCATGCAGGTGCCGCCGTTTTTGct  
cgagctggcgaattcc  
>CD\_NM\_001109.2:1826  
CgCctGcgagtctGGtatGCCAGAGAAGGTTTGTGAAATTTCAAGAGATTTCCAGCAAACCTTCTCTGGTTTTTGct  
cgagctggcgaattcc  
>CD\_NM\_001109.2:1694  
CgCctGcgagtctGGtatGATGTGGCGTTCTGCAGTGCAAGTTCAAGAGACTTGCAGTGCAGAACGCCACACTTTTTTGct  
cgagctggcgaattcc  
>CD\_NM\_001109.2:967  
CgCctGcgagtctGGtatGCGTCCGCCATGTGCTCCCACAGTTCAAGAGACTGTGGGAGCACATGGCGGACATTTTTTGct  
cgagctggcgaattcc  
>CD\_NM\_001109.2:725  
CgCctGcgagtctGGtatGAGTGCTGGAGGTGGTGAATCACTTCAAGAGAGTGATTACCACCTCCAGCACCTTTTTTGct  
cgagctggcgaattcc  
>CD\_NM\_001109.2:1222  
CgCctGcgagtctGGtatGAGCAGTCGGTGTGCCTCGCCAATTTCAAGAGATTGGCGAGGCACACCGACTGCGTTTTTGct  
cgagctggcgaattcc  
>CD\_NM\_001109.2:734  
CgCctGcgagtctGGtatGAGTGGTGAATCACGTGGACAAGTTCAAGAGACTTGTCCACGTGATTACCACCTTTTTTGct  
cgagctggcgaattcc  
>CD\_NM\_001109.2:1058  
CgCctGcgagtctGGtatGAGGCCACAACCTGGGCATGGACTTCAAGAGAGTCCATGCCAGGTTGTGGCCTTTTTGct  
cgagctggcgaattcc  
>CD\_NM\_001109.2:1451  
CgCctGcgagtctGGtatGCCCCAAGAAGGACATGTGTGACTTCAAGAGAGTCACACATGTCCTTCTTGGGATTTTTTGct  
cgagctggcgaattcc  
>CD\_NM\_001109.2:2531  
CgCctGcgagtctGGtatGCCCTGCGCCTGTGTGAAATTTTTCAAGAGAAAATTTCCACACAGGCGCAGGTTTTTTGct  
cgagctggcgaattcc  
>CD\_NM\_001109.2:1046

CgCctGcgagtctGGtatGAGCCCATGAGATGGGCCACAACCTCAAGAGAGTTGTGGCCCATCTCATGGGCCTTTTTGct  
cgagctggcgaattcc  
>CD\_NM\_001109.2:2068  
CgCctGcgagtctGGtatGAAGGCATCATCGTCTACCGCAATTC AAGAGATTGCGGTAGACGATGATGCCTGTTTTTGct  
cgagctggcgaattcc  
>CD\_NM\_001109.2:2096  
CgCctGcgagtctGGtatGAAGCCGCATCCTGAGCAGGAACCTCAAGAGAGTTCCTGCTCAGGATGCGGCTTTTTTGct  
cgagctggcgaattcc  
>CD\_NM\_001109.2:1638  
CgCctGcgagtctGGtatGCGCTTCTCCTATGACATCCTACTTCAAGAGAGTAGGATGTCATAGGAGAAGCATTTTTTGct  
cgagctggcgaattcc  
>CD\_NM\_001109.2:716  
CgCctGcgagtctGGtatGACGTCATCGGGTGTGGAGGTGTTCAAGAGACACCTCCAGCACCCGATGACGCTTTTTGct  
cgagctggcgaattcc  
>CD\_NM\_001109.2:656  
CgCctGcgagtctGGtatGAGAGCTGTATGTGGTCTGGACTTCAAGAGAGTCCACGACCACATACAGCTCCTTTTTGct  
cgagctggcgaattcc  
>CD\_NM\_001109.2:1760  
CgCctGcgagtctGGtatGATGCCACGCGCTCACCACAGAGTTCAAGAGACTCTGTGGTGAGCGGTGGCACTTTTTGct  
cgagctggcgaattcc  
>CD\_NM\_001109.2:1779  
CgCctGcgagtctGGtatGAAGGATGGCACTGCGTATGAACTTCAAGAGAGTTCATACGCAGTGCCATCCTTTTTGct  
cgagctggcgaattcc  
>CD\_NM\_001109.2:1654  
CgCctGcgagtctGGtatGCCCTACCAGGCTGCAAGGCCAGTTCAAGAGACTGGCCTTGCAGCCTGGTAGGATTTTTGct  
cgagctggcgaattcc  
>CD\_NM\_001109.2:1409  
CgCctGcgagtctGGtatGATGCCAGGAGTGCAAGGTGAAGTTCAAGAGACTTCACCTTGCACTCCTGGCAGTTTTTGct  
cgagctggcgaattcc  
>CD\_NM\_001109.2:316  
CgCctGcgagtctGGtatGATGCCAATGGCTCCGAGGTGACTTCAAGAGAGTCACCTCGGAGCCATTGGCAGTTTTTGct  
cgagctggcgaattcc  
>CD\_NM\_001109.2:1858  
CgCctGcgagtctGGtatGCGGACTTACACGTTTACAGATCTTCAAGAGAGATCTGTAAACGTGTAAGTCCTTTTTTGct  
cgagctggcgaattcc  
>CD\_NM\_001109.2:794  
CgCctGcgagtctGGtatGACTGGAGATTTGGAATAGTCAGTTCAAGAGACTGACTATTCCAAATCTCCAGGTTTTTGct  
cgagctggcgaattcc  
>CD\_NM\_003183:307  
CgCctGcgagtctGGtatGCACGATATTCTCTCTTTATCTATTCAAGAGATAGATAAAGAGAGAATATCGTATTTTTGct  
cgagctggcgaattcc  
>CD\_NM\_003183:466  
CgCctGcgagtctGGtatGCAGGTCGTGGTGGTGGATGGTATTCAAGAGATACCATCCACCACCACGACCTTTTTTGct  
cgagctggcgaattcc  
>CD\_NM\_003183:631  
CgCctGcgagtctGGtatGAAGCCACTTTGGAGATTTGTTATTCAAGAGATAACAAATCTCCAAAGTGGCTTTTTTGct  
cgagctggcgaattcc  
>CD\_NM\_003183:1216  
CgCctGcgagtctGGtatGCTGGGAACTCTTGGATTAGCTTTTCAAGAGAAAGCTAATCCAAGAGTCCCATTTTTTGct  
cgagctggcgaattcc  
>CD\_NM\_003183:1268  
CgCctGcgagtctGGtatGAAGGTGTTTGTCCAAAGGCTTATTCAAGAGATAAGCCTTTGGACAAACACCTTTTTTGct  
cgagctggcgaattcc  
>CD\_NM\_003183:1813



CgCctGcgagtctGGtatGAGCGTGTCTACTGCACAGGTATTCAAGAGATACCTGTGCAGTAGGACACGCCTTTTTTGct  
cgagctggcgaattcc  
>CD\_NM\_003183.4:307  
CgCctGcgagtctGGtatGCCGATATTCTCTCTTTATCTAATTC AAGAGATTAGATAAAGAGAGAATATCGTTTTTTTGct  
cgagctggcgaattcc  
>CD\_NM\_003183.4:2252  
CgCctGcgagtctGGtatGCGTCCATTGTGTGGATAAGAAATTC AAGAGATTTCTTATCCACACAATGGACATTTTTTGct  
cgagctggcgaattcc  
>CD\_NM\_003183.4:972  
CgCctGcgagtctGGtatGCACACTTCATGGGATAATGCAGTTCAAGAGACTGCATTATCCCATGAAGTGTTTTTTTGct  
cgagctggcgaattcc  
>CD\_NM\_003183.4:1646  
CgCctGcgagtctGGtatGATGTGATCCTGGCATCATGTATTTCAAGAGAATACATGATGCCAGGATCACACTTTTTTGct  
cgagctggcgaattcc  
>CD\_NM\_003183.4:1391  
CgCctGcgagtctGGtatGCACTCATGAATTGGGACATAATTTCAAGAGAATTATGTCCCAATTCATGAGTTTTTTTGct  
cgagctggcgaattcc  
>CD\_NM\_003183.4:284  
CgCctGcgagtctGGtatGACTTGATTCTTTGCTCTCAGACTTCAAGAGAGTCTGAGAGCAAAGAATCAAGCTTTTTTGct  
cgagctggcgaattcc  
>CD\_NM\_003183.4:2603  
CgCctGcgagtctGGtatGATCCTTTAAACTGCAGCGTCAGTTCAAGAGACTGACGCTGCAGTTTAAAGGAGTTTTTTTGct  
cgagctggcgaattcc  
>CD\_NM\_003183.4:2019  
CgCctGcgagtctGGtatGACCTATGTCGATGCTGAACAAATTC AAGAGATTTGTTTCAGCATCGACATAGGGTTTTTTTGct  
cgagctggcgaattcc  
>CD\_NM\_003183.4:363  
CgCctGcgagtctGGtatGAAGACTTCAACACATGTAGAAATTC AAGAGATTTCTACATGTGTTGAAGTCTGTTTTTTGct  
cgagctggcgaattcc  
>CD\_NM\_003183.4:1917  
CgCctGcgagtctGGtatGCTCCCTTTCTGCGAGAGGGAAC TCAAGAGAGTTCCCTCTCGCAGAAAGGGATTTTTTTGct  
cgagctggcgaattcc  
>CD\_NM\_003183.4:1948  
CgCctGcgagtctGGtatGCGTCCGTGTCATGTAATGAACTTC AAGAGAGTTTCATTACATGCACAGGACTTTTTTTGct  
cgagctggcgaattcc  
>CD\_NM\_003183.4:185  
CgCctGcgagtctGGtatGAAGGCAGTCTCTCCTATTCCTGTTCAAGAGACAGGAATAGGAGAGACTGCCTTTTTTTGct  
cgagctggcgaattcc  
>CD\_NM\_003183.4:187  
CgCctGcgagtctGGtatGAGCAGTCTCTCCTATTCCTGACTTCAAGAGAGTCAGGAATAGGAGAGACTGCCTTTTTTTGct  
cgagctggcgaattcc  
>CD\_NM\_003183.4:1505  
CgCctGcgagtctGGtatGCGGCGATCACGAGAACAATAAGTTCAAGAGACTTATTGTTCTCGTGATCGCCATTTTTTTGct  
cgagctggcgaattcc  
>CD\_NM\_003183.4:586  
CgCctGcgagtctGGtatGCTGTTATAATCAGAATCAACACTTCAAGAGAGTGTGATTCTGATTATAACATTTTTTTGct  
cgagctggcgaattcc  
>CD\_NM\_003183.4:1813  
CgCctGcgagtctGGtatGACGTGTCTACTGCACAGGTAATTC AAGAGATTACCTGTGCAGTAGGACACGCCTTTTTTTGct  
cgagctggcgaattcc  
>CD\_NM\_003183.4:1658  
CgCctGcgagtctGGtatGAATCATGTATCTGAACAACGACTTCAAGAGAGTCGTTGTTTCAGATAACATGATTTTTTTGct  
cgagctggcgaattcc  
>CD\_NM\_003183.4:1623

CgCctGcgagtctGGtatGCCGAGGGTGGATGAAGGAGAAGTTCAAGAGACTTCTCCTTCATCCACCTCGATTTTTTGct  
cgagctggcgaattcc  
>CD\_NM\_003183.4:1760  
CgCctGcgagtctGGtatGATTTGAGACTGCCAGAAGAAGTTCAAGAGACTTCTTCTGGGCAGTCTCAAACTTTTTGct  
cgagctggcgaattcc  
>CD\_NM\_003183.4:967  
CgCctGcgagtctGGtatGCTCGGAACACTTCATGGGATAATTCAAGAGATTATCCCATGAAGTGTTCCGATTTTTTGct  
cgagctggcgaattcc  
>CD\_NM\_003183.4:2015  
CgCctGcgagtctGGtatGCGTGCCCTATGTTCGATGCTGAATTCAAGAGATTCAGCATCGACATAGGGCACATTTTTTGct  
cgagctggcgaattcc  
>CD\_NM\_003183.4:953  
CgCctGcgagtctGGtatGCGTTGATGACATCTATCGGAACCTCAAGAGAGTTCGATAGATGTCATCAACTTTTTTGct  
cgagctggcgaattcc  
>CD\_NM\_003183.4:2147  
CgCctGcgagtctGGtatGAATTGACCAGCTGAGCATCAATTTCAAGAGAATTGATGCTCAGCTGGTCAATGTTTTTGct  
cgagctggcgaattcc  
>CD\_NM\_003183.4:575  
CgCctGcgagtctGGtatGCAGAGATGATGATGTTATAATCTTCAAGAGAGATTATAACATCATCATCTTTTTTTTGct  
cgagctggcgaattcc  
>CD\_NM\_003183.4:573  
CgCctGcgagtctGGtatGCTAAGAGATGATGATGTTATAATTCAAGAGATTATAACATCATCATCTTTATTTTTTGct  
cgagctggcgaattcc  
>CD\_NM\_003183.4:2637  
CgCctGcgagtctGGtatGCGCAAAGAAAACAGAGTGCTAATTTCAAGAGAATTAGCACTCTGTTTCTTTGCTTTTTTTGct  
cgagctggcgaattcc  
>CD\_NM\_003183.4:948  
CgCctGcgagtctGGtatGAACAGAGTTGATGACATCTATCTTCAAGAGAGATAGATGTCATCAACTCTGTCTTTTTTGct  
cgagctggcgaattcc  
>CD\_NM\_001110:497  
CgCctGcgagtctGGtatGAAGGTCAGTATGGGAATCCTTTTTCAAGAGAAAAGGATTCCCATACTGACCTCTTTTTTGct  
cgagctggcgaattcc  
>CD\_NM\_001110:856  
CgCctGcgagtctGGtatGAAGCCAGCAGAGATATATTATTCAAGAGATAATATATCTCTCTGCTGGCTTTTTTTGct  
cgagctggcgaattcc  
>CD\_NM\_001110:889  
CgCctGcgagtctGGtatGATGCCATTTCACTCTGTCAATTTTTCAAGAGAAAATGACAGAGTGAAATGGCAGTTTTTTGct  
cgagctggcgaattcc  
>CD\_NM\_001110:957  
CgCctGcgagtctGGtatGAGGCTGTGCAGATCATTCAAGAGATACTGAATGATCTGCACAGCCCTTTTTTGct  
cgagctggcgaattcc  
>CD\_NM\_001110:1559  
CgCctGcgagtctGGtatGCACCTCCCAAAGTCTCTCACATTTCAAGAGAATGTGAGAGACTTTGGGAGGTATTTTTTGct  
cgagctggcgaattcc  
>CD\_NM\_001110:2113  
CgCctGcgagtctGGtatGCGGCATACACAAGTGTGCATTATTCAAGAGATAATGCACACTTGTGTATGCCTTTTTTTGct  
cgagctggcgaattcc  
>CD\_NM\_001110:890  
CgCctGcgagtctGGtatGCGCCATTTCACTCTGTCAATTTATTCAAGAGATAAATGACAGAGTGAAATGGCATTTTTTGct  
cgagctggcgaattcc  
>CD\_NM\_001110.2:1124  
CgCctGcgagtctGGtatGAACTGATCATTTGTTCTTTAAATTCAAGAGATTTAAAGAACAATGATCAGTCTTTTTTGct  
cgagctggcgaattcc  
>CD\_NM\_001110.2:528

CgCctGcgagtctGGtatGCTCAGACATTATGAAGGATTATTTCAAGAGAATAATCCTTCATAATGTCTGATTTTTTgct  
cgagctggcgaattcc  
>CD\_NM\_001110.2:890  
CgCctGcgagtctGGtatGCTTTCACCTCTGTCATTTATCATTTCAAGAGAATGATAAATGACAGAGTGAAATTTTTTgct  
cgagctggcgaattcc  
>CD\_NM\_001110.2:2022  
CgCctGcgagtctGGtatGAATTCAGACTGTGCAAGGGAAGTTCAAGAGACTTCCCTTGACAGTCTGAATCTTTTTGct  
cgagctggcgaattcc  
>CD\_NM\_001110.2:2070  
CgCctGcgagtctGGtatGCGCCAGCATCTGACCCTAAACTTCAAGAGAGTTTAGGGTCAGATGCTGGGCATTTTTGct  
cgagctggcgaattcc  
>CD\_NM\_001110.2:1735  
CgCctGcgagtctGGtatGCATTCTCACTCTGTAGTATTAGTTCAAGAGACTAATACTACAGAGTGAGAATTTTTTgct  
cgagctggcgaattcc  
>CD\_NM\_001110.2:957  
CgCctGcgagtctGGtatGAGCTGTGCAGATCATTCAAGTATTTCAAGAGAATACTGAATGATCTGCACAGCCTTTTTGct  
cgagctggcgaattcc  
>CD\_NM\_001110.2:1176  
CgCctGcgagtctGGtatGAAGATATCCAGTCATGTTAAAGTTCAAGAGACTTTAACATGACTGGATATCTGTTTTTgct  
cgagctggcgaattcc  
>CD\_NM\_001110.2:1739  
CgCctGcgagtctGGtatGATCACTCTGTAGTATTAGAAATTTCAAGAGAATTTCTAATACTACAGAGTGAGTTTTTgct  
cgagctggcgaattcc  
>CD\_NM\_001110.2:548  
CgCctGcgagtctGGtatGCTCTTACAATGTGGATTCAATTATTCAAGAGATAATGAATCCACATTGTAAGATTTTTTgct  
cgagctggcgaattcc  
>CD\_NM\_001110.2:1890  
CgCctGcgagtctGGtatGCGCTGCTTCGATGCAAATCAACTTCAAGAGAGTTGATTTGCATCGAAGCAGCATTTTTGct  
cgagctggcgaattcc  
>CD\_NM\_001110.2:897  
CgCctGcgagtctGGtatGAACTCTGTCAATTTATCATGAAGTTCAAGAGACTTCATGATAAATGACAGAGTGTTTTTgct  
cgagctggcgaattcc  
>CD\_NM\_001110.2:1561  
CgCctGcgagtctGGtatGATCCCAAAGTCTCTCACATTACTTCAAGAGAGTAATGTGAGAGACTTTGGGAGTTTTTgct  
cgagctggcgaattcc  
>CD\_NM\_001110.2:497  
CgCctGcgagtctGGtatGCGGTCAGTATGGGAATCCTTTATTCAAGAGATAAAGGATTCCCATACTGACCTTTTTTgct  
cgagctggcgaattcc  
>CD\_NM\_001110.2:1737  
CgCctGcgagtctGGtatGCTCTCACTCTGTAGTATTAGAATTTCAAGAGATTCTAATACTACAGAGTGAGAATTTTTGct  
cgagctggcgaattcc  
>CD\_NM\_001110.2:1853  
CgCctGcgagtctGGtatGCTGTGATTGTGGCTATAGTGACTTCAAGAGAGTCACTATAGCCACAATCACATTTTTTgct  
cgagctggcgaattcc  
>CD\_NM\_001110.2:2097  
CgCctGcgagtctGGtatGCTCACAGACTGTAATAGGCATATTCAAGAGATATGCCATTACAGTCTGTGAATTTTTGct  
cgagctggcgaattcc  
>CD\_NM\_001110.2:792  
CgCctGcgagtctGGtatGAGGTCTGTTATTGATGGAAGATTTCAAGAGAATCTCCATCAATAACAGACCCTTTTTGct  
cgagctggcgaattcc  
>CD\_NM\_001110.2:1586  
CgCctGcgagtctGGtatGCGCTCACGAAGTTGGACATAACTTCAAGAGAGTTATGTCCAACCTTCGTGAGCATTTTTGct  
cgagctggcgaattcc  
>CD\_NM\_001110.2:2028

CgCctGcgagtctGGtatGAACTGTGCAAGGGAAGGAATATTTCAAGAGAATATTCCTTCCCTTGCACAGTCTTTTTGct  
cgagctggcgaattcc  
>CD\_NM\_001110.2:689  
CgCctGcgagtctGGtatGAAGTGATGAATTTAAAGTAGAATTTCAAGAGATTCTACTTTAAATTCATCACTGTTTTGct  
cgagctggcgaattcc  
>CD\_NM\_001110.2:1382  
CgCctGcgagtctGGtatGCTTGGCCTATGTCTTTCACAGACTTCAAGAGAGTCTGTGAAGACATAGGCCAAATTTTTGct  
cgagctggcgaattcc  
>CD\_NM\_001110.2:1981  
CgCctGcgagtctGGtatGAACAGTGTGCATTCAAGTCAAATTTCAAGAGATTTGACTTGAATGCACACTGTGTTTTGct  
cgagctggcgaattcc  
>CD\_NM\_001110.2:2517  
CgCctGcgagtctGGtatGCTGGCTGGATTTATTAAGATATTTCAAGAGAATATCTTAATAAATCCAGCCATTTTTGct  
cgagctggcgaattcc  
>CD\_NM\_001110.2:2144  
CgCctGcgagtctGGtatGCGCAGGTTCTATCTGTGAGAAATTTCAAGAGATTTCTCACAGATAGAACCCTGCATTTTTGct  
cgagctggcgaattcc  
>CD\_NM\_001110.2:786  
CgCctGcgagtctGGtatGCGCCATGGGTCTGTTATTGATGTTCAAGAGACATCAATAACAGACCCATGGCTTTTTGct  
cgagctggcgaattcc  
>CD\_NM\_004334:419  
CgCctGcgagtctGGtatGCGGCACTCTATTTCCAGAGATATTTCAAGAGATATCTCTGGGAATAGAGTGCCTTTTTGct  
cgagctggcgaattcc  
>CD\_NM\_004334:953  
CgCctGcgagtctGGtatGCCCCATCCTGACTGTGCCTTAATTTCAAGAGATTAAGGCACAGTCAGGATGGGTTTTGct  
cgagctggcgaattcc  
>CD\_NM\_004334.1:419  
CgCctGcgagtctGGtatGAGCACTCTATTTCCAGAGATAATTTCAAGAGATTATCTCTGGGAATAGAGTGCCTTTTTGct  
cgagctggcgaattcc  
>CD\_NM\_004334.1:744  
CgCctGcgagtctGGtatGCGCAGATTATGAAATTTCAAACCTTCAAGAGAGTTTGGAAATTTTATAATCTGCATTTTTGct  
cgagctggcgaattcc  
>CD\_NM\_004334.1:571  
CgCctGcgagtctGGtatGAACTCTGGACTCGATTACCAATTTCAAGAGAATTTGGTAATCGAGTCCAGAGTCTTTTTGct  
cgagctggcgaattcc  
>CD\_NM\_004334.1:976  
CgCctGcgagtctGGtatGCCGGCAGCAGCCGCTACTCAAATTTCAAGAGATTTGAGTAGCGGCTGCTGCCGATTTTTGct  
cgagctggcgaattcc  
>CD\_NM\_004334.1:303  
CgCctGcgagtctGGtatGCCCCGAGCAGCGGAACAAGAACTTTCAAGAGAGTTCTTGTTCGCTGCTCGGGATTTTTGct  
cgagctggcgaattcc  
>CD\_NM\_004334.1:1063  
CgCctGcgagtctGGtatGACTTCCCGACTCAACTGTAACCTTCAAGAGAGTTACAGTTGAGTCCGGGAAGCTTTTTGct  
cgagctggcgaattcc  
>CD\_NM\_004334.1:742  
CgCctGcgagtctGGtatGCTTGCAGATTATGAAATTTCAAATTTCAAGAGATTTGGAATTTTATAATCTGCAAATTTTTGct  
cgagctggcgaattcc  
>CD\_NM\_004334.1:586  
CgCctGcgagtctGGtatGCACCAATCCTGCCCTACATCAGTTCAAGAGACTGATGTAGGGCAGGATTGGTATTTTTGct  
cgagctggcgaattcc  
>CD\_NM\_004334.1:681  
CgCctGcgagtctGGtatGAGTGATCCACGTCATGCTGAATTTCAAGAGAATTTAGCATGACGTGGATCACCTTTTTGct  
cgagctggcgaattcc  
>CD\_NM\_004334.1:898

CgCtGcgagtctGGtatGCGCTGTATTAATGATTACCGACTTCAAGAGAGTCGGTAATCATTAAATACAGCTTTTTTtGct  
cgagctggcgaattcc  
>CD\_NM\_004334.1:953  
CgCtGcgagtctGGtatGACCATCCTGACTGTGCCTTAAATTCAGAGATTTAAGGCACAGTCAGGATGGTTTTTtGct  
cgagctggcgaattcc  
>CD\_NM\_004334.1:171  
CgCtGcgagtctGGtatGACTGCAGCTTCTGCTTCTACTGTTCAAGAGACAGTAGAAGCAGAAGCTGCAGCTTTTTTtGct  
cgagctggcgaattcc  
>CD\_NM\_004334.1:156  
CgCtGcgagtctGGtatGACTGCTCCAGCTGCTGCTGCAGTTCAAGAGACTGCAGCAGCAGCTGGAGCAGCTTTTTTtGct  
cgagctggcgaattcc  
>CD\_NM\_004334.1:415  
CgCtGcgagtctGGtatGCCAGGCACTCTATTCCCAGAGTTCAAGAGACTCTGGGAATAGAGTGCCTGGATTTTTTtGct  
cgagctggcgaattcc  
>CD\_NM\_004334.1:468  
CgCtGcgagtctGGtatGACTTGTTAACAGCTTTCAGACTTCAAGAGAGTCTGCAAAGCTGTTAACAAAGTTTTTtGct  
cgagctggcgaattcc  
>CD\_NM\_004334.1:695  
CgCtGcgagtctGGtatGCGCTGAATGGTTCAGAGCCAACCTTCAAGAGAGTTGGCTCTGAACCATTACAGATTTTTTtGct  
cgagctggcgaattcc  
>CD\_NM\_004334.1:888  
CgCtGcgagtctGGtatGATTCCAGTACAGCTGTATTAATTTCAAGAGAATTAATACAGCTGTACTGGAACTTTTTtGct  
cgagctggcgaattcc  
>CD\_NM\_004334.1:456  
CgCtGcgagtctGGtatGCAATAGCCACCTCCTTGTTAACTTCAAGAGAGTTAACAAAGGAGGTGGCTATTTTTTTtGct  
cgagctggcgaattcc  
>CD\_NM\_004334.1:417  
CgCtGcgagtctGGtatGAAGGCACTCTATTCCCAGAGATTTCAAGAGAATCTCTGGGAATAGAGTGCCTGTTTTTtGct  
cgagctggcgaattcc  
>CD\_NM\_004334.1:342  
CgCtGcgagtctGGtatGCGCCTTTAAAGTGGCGCTGGACTTCAAGAGAGTCCAGCGCCACTTTAAAGGCTTTTTTtGct  
cgagctggcgaattcc  
>CD\_NM\_004334.1:918  
CgCtGcgagtctGGtatGCCAGTGAAGCTCTTACAGTGTTCAGAGAGACTGTAAGAGCTTCACTGGTTTTTTtGct  
cgagctggcgaattcc  
>CD\_NM\_004334.1:413  
CgCtGcgagtctGGtatGCGTCCAGGCACTCTATTCCCAGTTCAAGAGACTGGGAATAGAGTGCCTGGACATTTTTTtGct  
cgagctggcgaattcc  
>CD\_NM\_004334.1:715  
CgCtGcgagtctGGtatGCCAGGAGCCTATCCCATCAAAGTTCAAGAGACTTTGATGGGATAGGCTCCTGTTTTTTtGct  
cgagctggcgaattcc  
>CD\_NM\_004334.1:680  
CgCtGcgagtctGGtatGAGGTGATCCACGTCATGCTGAATTCAAGAGATTCAGCATGACGTGGATCACCTTTTTTtGct  
cgagctggcgaattcc  
>CD\_NM\_004334.1:796  
CgCtGcgagtctGGtatGCTCTGGGTTATGCATGAAATTGTTCAAGAGACAATTCATGCATAACCCAGATTTTTTTtGct  
cgagctggcgaattcc  
>CD\_NM\_004334.1:756  
CgCtGcgagtctGGtatGCATTCAAACCTCCAGAAGGAATTCAGAGATTCCTTCTGGAGGTTTGAATTTTTTTtGct  
cgagctggcgaattcc  
>CD\_NM\_004334.1:1052  
CgCtGcgagtctGGtatGCTCTGGTGTGGCTTCCCGGACTTCAAGAGAGTCCGGGAAGCCAGCACCAGAATTTTTTtGct  
cgagctggcgaattcc  
>CD\_NM\_004334.1:598

CgCctGcgagtctGGtatGACTACATCAGAAGACTGTGAAATTC AAGAGATTCACAGTCTTCTGATGTAGGTTTTTGct  
cgagctggcgaattcc  
>CD\_NM\_004334.1:686  
CgCctGcgagtctGGtatGCCACGTCATGCTGAATGGTTCTTCAAGAGAGAACCATTTCAGCATGACGTGGATTTTTTGct  
cgagctggcgaattcc  
>CD\_NM\_004334.1:785  
CgCctGcgagtctGGtatGAACGAATCGAGATCTGGGTTATTTCAAGAGAATAACCCAGATCTCGATTCGTGTTTTTGct  
cgagctggcgaattcc  
>CD\_NM\_004334.1:652  
CgCctGcgagtctGGtatGCCATCCAGTATTCCAAGGATATTCAAGAGATATCCTTGGAATACTGGATGGATTTTTTGct  
cgagctggcgaattcc  
>CD\_NM\_012314:55  
CgCctGcgagtctGGtatGCTGGCGTGTGTTGGGTTCTTCTTTCAAGAGAAGAAGAACCCAAACACACGCCATTTTTTGct  
cgagctggcgaattcc  
>CD\_NM\_014511:1007  
CgCctGcgagtctGGtatGACCCAACAGATATCATCGTGTATTCAAGAGATACACGATGATATCTGTTGGGTTTTTGct  
cgagctggcgaattcc  
>CD\_NM\_014218.1:680  
CgCctGcgagtctGGtatGACTTGTCTGTACAGGAACTTCAAGAGAGTTTCTGTGACAGAAACAAGCTTTTTTGct  
cgagctggcgaattcc  
>CD\_NM\_014218.1:897  
CgCctGcgagtctGGtatGCGCGAGGACTCTGATGAACAAGTTCAAGAGACTTGTTCATCAGAGTCCCTCGCTTTTTTGct  
cgagctggcgaattcc  
>CD\_NM\_014218.1:182  
CgCctGcgagtctGGtatGATCAGATGTCATGTTTGAACACTTCAAGAGAGTGTCAAACATGACATCTGACTTTTTTGct  
cgagctggcgaattcc  
>CD\_NM\_014218.1:236  
CgCctGcgagtctGGtatGAACTTTGCGCCTCATTGGAGAATTCAAGAGATTCCTCAATGAGGCGCAAAGTTTTTTGct  
cgagctggcgaattcc  
>CD\_NM\_014218.1:481  
CgCctGcgagtctGGtatGACTCCCGGAGCTCCTATGACATTTCAAGAGAATGTCATAGGAGCTCCGGGAGCTTTTTTGct  
cgagctggcgaattcc  
>CD\_NM\_014218.1:142  
CgCctGcgagtctGGtatGACCTGGTGAAATCAGAAGAGACTTCAAGAGAGTCTCTTCTGATTTACCAGGGTTTTTGct  
cgagctggcgaattcc  
>CD\_NM\_014218.1:380  
CgCctGcgagtctGGtatGACCTCTGGACATCGTGATCATATTCAAGAGATATGATCACGATGTCCAGAGGGTTTTTGct  
cgagctggcgaattcc  
>CD\_NM\_014218.1:868  
CgCctGcgagtctGGtatGCAGAGTCTGCAGGAAACAGAACTTCAAGAGAGTCTGTTTCTGACTTTTTTGct  
cgagctggcgaattcc  
>CD\_NM\_014218.1:690  
CgCctGcgagtctGGtatGATCACAGGAAACCCTTCAAATATTCAAGAGATATTTGAAGGGTTTCTGTGACTTTTTTGct  
cgagctggcgaattcc  
>CD\_NM\_014218.1:1007  
CgCctGcgagtctGGtatGACCAACAGATATCATCGTGTACTTCAAGAGAGTACACGATGATATCTGTTGGGTTTTTGct  
cgagctggcgaattcc  
>CD\_NM\_014218.1:172  
CgCctGcgagtctGGtatGCGCAATGTTGGTCAGATGTCATTTCAAGAGAATGACATCTGACCAACATTGCATTTTTTGct  
cgagctggcgaattcc  
>CD\_NM\_014218.1:630  
CgCctGcgagtctGGtatGAGCTCTTTCCATGACTCTCCATTTCAAGAGAATGGAGAGTCATGGAAAGAGCCTTTTTTGct  
cgagctggcgaattcc  
>CD\_NM\_014218.1:287

CgCctGcgagtctGGtatGATCCATCAGTCGCATGACGCAATTCAAGAGATTGCGTCATGCGACTGATGGAGTTTTTGct  
cgagctggcgaattcc  
>CD\_NM\_014218.1:463  
CgCctGcgagtctGGtatGCTGTGACCTTGTCCTGCAGCTCTTCAAGAGAGAGCTGCAGGACAAGGTCACATTTTTTGct  
cgagctggcgaattcc  
>CD\_NM\_014218.1:642  
CgCctGcgagtctGGtatGAACTCTCCATACGAGTGGTCAATTCAAGAGATTGACCACTCGTATGGAGAGTCTTTTTTGct  
cgagctggcgaattcc  
>CD\_NM\_014218.1:1026  
CgCctGcgagtctGGtatGCACACGGAACCTCCAAATGCTGTTCAAGAGACAGCATTGGAAGTTCCGTGTATTTTTTGct  
cgagctggcgaattcc  
>CD\_NM\_014218.1:179  
CgCctGcgagtctGGtatGCTGGTCAGATGTCATGTTTGAATTCAAGAGATTCAAACATGACATCTGACCAATTTTTTGct  
cgagctggcgaattcc  
>CD\_NM\_014218.1:324  
CgCctGcgagtctGGtatGCACAGATGCTACGGTCTGTTATTCAAGAGATAACAGAACCCTAGCATCTGTATTTTTTGct  
cgagctggcgaattcc  
>CD\_NM\_014218.1:155  
CgCctGcgagtctGGtatGCGAAGAGACAGTCATCCTGCAATTCAAGAGATTGCAGGATGACTGTCTCTTTTTTGct  
cgagctggcgaattcc  
>CD\_NM\_014218.1:932  
CgCctGcgagtctGGtatGAACATACACACAGTTGAATCACTTCAAGAGAGTGATTCAACTGTGTGTATGTCTTTTTTGct  
cgagctggcgaattcc  
>CD\_NM\_014218.1:782  
CgCctGcgagtctGGtatGATCAGTGGTCATCATCCTCTTCTTCAAGAGAGAAGAGGATGATGACCACTGAGTTTTTGct  
cgagctggcgaattcc  
>CD\_NM\_014218.1:374  
CgCctGcgagtctGGtatGAAGTGACCCTCTGGACATCGTGTTCAGAGACACGATGTCCAGAGGGTCACTGTTTTTGct  
cgagctggcgaattcc  
>CD\_NM\_014218.1:930  
CgCctGcgagtctGGtatGATGACATACACACAGTTGAATCTTCAAGAGAGATTCAACTGTGTGTATGTCACTTTTTGct  
cgagctggcgaattcc  
>CD\_NM\_014218.1:678  
CgCctGcgagtctGGtatGATGCTTGTCTGTACAGGAATTCAAGAGATTCTGTGACAGAAACAAGCAGTTTTTGct  
cgagctggcgaattcc  
>CD\_NM\_014218.1:928  
CgCctGcgagtctGGtatGCGGTGACATACACACAGTTGAATCAAGAGATTCAACTGTGTGTATGTCACCTTTTTTGct  
cgagctggcgaattcc  
>CD\_NM\_014218.1:823  
CgCctGcgagtctGGtatGCTCATCGCTGGTGTCCAACAATTCAAGAGATTGTTGGAGCACCAGCGATGAATTTTTTGct  
cgagctggcgaattcc  
>CD\_NM\_014218.1:604  
CgCctGcgagtctGGtatGACCACGGAGGGACCTACAGATGTTCAAGAGACATCTGTAGGTCCCTCCGTGGGTTTTTGct  
cgagctggcgaattcc  
>CD\_NM\_014218.1:632  
CgCctGcgagtctGGtatGATCTTCCATGACTCTCCATACTTCAAGAGAGTATGGAGAGTCATGGAAAGAGTTTTTGct  
cgagctggcgaattcc  
>CD\_NM\_014218.1:35  
CgCctGcgagtctGGtatGATCGCTCTTGTTCGTCAGCATGTTCAAGAGACATGCTGACGAACAAGAGCGACTTTTTTGct  
cgagctggcgaattcc  
>CD\_NM\_014218.1:980  
CgCctGcgagtctGGtatGCCGCCCTTCTCAGAGGCCCAAGTTCAAGAGACTTGGGCCTCTGAGAAGGGCGATTTTTTGct  
cgagctggcgaattcc  
>CD\_NM\_014218.1:55

CgCctGcgagtctGGtatGCGGCGTGTGTTGGGTTCTTCTTTTCAAGAGAAAGAAGAACCCAACACACGCCATTTTTTGct  
cgagctggcgaattcc  
>CD\_NM\_012314:36  
CgCctGcgagtctGGtatGCTGGCGTGTGTTGGGTTCTTCTTTTCAAGAGAAGAAGAACCCAACACACGCCATTTTTTGct  
cgagctggcgaattcc  
>CD\_NM\_014511:988  
CgCctGcgagtctGGtatGACCCAACAGATATCATCGTGTATTCAAGAGATACACGATGATATCTGTTGGGTTTTTTGct  
cgagctggcgaattcc  
>CD\_NM\_014219.1:661  
CgCctGcgagtctGGtatGACTTGTCTGTGCATAGGAACTTCAAGAGAGTTTCTATGACAGAAAACAAGCTTTTTTGct  
cgagctggcgaattcc  
>CD\_NM\_014219.1:878  
CgCctGcgagtctGGtatGCGCGAGGACTCTGATGAACAAGTTCAAGAGACTTGTTCATCAGAGTCTCGCTTTTTTGct  
cgagctggcgaattcc  
>CD\_NM\_014219.1:217  
CgCctGcgagtctGGtatGAACTTTGCACCTCATTGGAGAGTTCAAGAGACTCTCCAATGAGGTGCAAAGTGTTTTTGct  
cgagctggcgaattcc  
>CD\_NM\_014219.1:192  
CgCctGcgagtctGGtatGCGCACAGAGAAGGGAAGTTTAAATTC AAGAGATTAACTTCCCTTCTGTGCATTTTTGct  
cgagctggcgaattcc  
>CD\_NM\_014219.1:462  
CgCctGcgagtctGGtatGACTCCCGGAGCTCCTATGACATTTCAAGAGAATGTCATAGGAGCTCCGGGAGCTTTTTGct  
cgagctggcgaattcc  
>CD\_NM\_014219.1:123  
CgCctGcgagtctGGtatGACCTGGTGAAATCAGAAGAGACTTCAAGAGAGTCTTCTTGATTTACCAGGCTTTTTGct  
cgagctggcgaattcc  
>CD\_NM\_014219.1:611  
CgCctGcgagtctGGtatGAGCTCTTTCCGTGACTCTCCATTTCAAGAGAATGGAGAGTCACGGAAAGAGCCTTTTTGct  
cgagctggcgaattcc  
>CD\_NM\_014219.1:175  
CgCctGcgagtctGGtatGATTTGAGCACTTCTTCTGCACTTCAAGAGAGTGCAGAAGGAAGTCTCAAACTTTTGct  
cgagctggcgaattcc  
>CD\_NM\_014219.1:988  
CgCctGcgagtctGGtatGACCAACAGATATCATCGTGTACTTCAAGAGAGTACACGATGATATCTGTTGGTTTTTTGct  
cgagctggcgaattcc  
>CD\_NM\_014219.1:118  
CgCctGcgagtctGGtatGCGGTGCGCTGGTGAAATCAGAATTC AAGAGATTCTGATTTACCAGGCGACCTTTTTGct  
cgagctggcgaattcc  
>CD\_NM\_014219.1:153  
CgCctGcgagtctGGtatGCGCAATGTTGGTCAGATGTCAGTTCAAGAGACTGACATCTGACCAACATTGCATTTTTGct  
cgagctggcgaattcc  
>CD\_NM\_014219.1:16  
CgCctGcgagtctGGtatGATCGCTCATGGTCGTCAGCATGTTCAAGAGACATGCTGACGACCATGAGCGACTTTTTGct  
cgagctggcgaattcc  
>CD\_NM\_014219.1:444  
CgCctGcgagtctGGtatGACGTGACCTTGTCTGCAGCTCTTCAAGAGAGAGCTGCAGGACAAGGTCACGCTTTTTGct  
cgagctggcgaattcc  
>CD\_NM\_014219.1:623  
CgCctGcgagtctGGtatGAACTCTCCATACGAGTGGTCAATTC AAGAGATTGACCACTCGTATGGAGAGTCTTTTTGct  
cgagctggcgaattcc  
>CD\_NM\_014219.1:305  
CgCctGcgagtctGGtatGCACAGATGCTACGGTCTGTTATTCAAGAGATAACAGAACCGTAGCATCTGTATTTTTGct  
cgagctggcgaattcc  
>CD\_NM\_014219.1:702



CgCctGcgagtctGGtatGAACCCACTGAACCAAGCTCTAATTCAAGAGATTAGAGCTTGGTTCAGTGGGTGTTTTTGct  
cgagctggcgaattcc  
>CD\_NM\_014219.1:136  
CgCctGcgagtctGGtatGCGAAGAGACAGTCATCCTGCAATTCAGAGATTGCAGGATGACTGTCTCTTCTTTTTTGct  
cgagctggcgaattcc  
>CD\_NM\_014219.1:913  
CgCctGcgagtctGGtatGAACATACACACAGTTGAATCACTTCAAGAGAGTGATTCAACTGTGTGTATGTCTTTTTGct  
cgagctggcgaattcc  
>CD\_NM\_014219.1:849  
CgCctGcgagtctGGtatGCAGAGTCTGCAGGGAACAGAACTTCAAGAGAGTCTGTTCCTGCAGACTCTTTTTTGct  
cgagctggcgaattcc  
>CD\_NM\_014219.1:763  
CgCctGcgagtctGGtatGATCAGTGGTCATCATCCTCTTCTTCAAGAGAGAAGAGGATGATGACCACTGAGTTTTTGct  
cgagctggcgaattcc  
>CD\_NM\_014219.1:659  
CgCctGcgagtctGGtatGATGCTTGTTCGTTCATAGGAATTCAGAGATTCCTATGACAGAAACAAGCAGTTTTTGct  
cgagctggcgaattcc  
>CD\_NM\_014219.1:355  
CgCctGcgagtctGGtatGAAGTGACCCCTCTGGACATCGTCTTCAAGAGAGACGATGTCCAGAGGGTCACTGTTTTTGct  
cgagctggcgaattcc  
>CD\_NM\_014219.1:911  
CgCctGcgagtctGGtatGATGACATACACACAGTTGAATCTTCAAGAGAGATTCAACTGTGTGTATGTCACTTTTTGct  
cgagctggcgaattcc  
>CD\_NM\_014219.1:268  
CgCctGcgagtctGGtatGATCCATCGGTCCCATGATGCAATTCAGAGATTGCATCATGGGACCGATGGAGTTTTTGct  
cgagctggcgaattcc  
>CD\_NM\_014219.1:271  
CgCctGcgagtctGGtatGAATCGGTCCCATGATGCAAGACTTCAAGAGAGTCTTGCATCATGGGACCGATTTTTTGct  
cgagctggcgaattcc  
>CD\_NM\_014219.1:377  
CgCctGcgagtctGGtatGCTCACAGGTCTATATGAGAACTTCAAGAGAGTTTCTCATATAGACCTGTGATTTTTTGct  
cgagctggcgaattcc  
>CD\_NM\_014219.1:909  
CgCctGcgagtctGGtatGCGGTGACATACACACAGTTGAATTCAGAGATTCAACTGTGTGTATGTCACTTTTTGct  
cgagctggcgaattcc  
>CD\_NM\_014219.1:671  
CgCctGcgagtctGGtatGATCATAGGAAACCCTTCAAATATTCAGAGATATTTGAAGGGTTTCTTATGACTTTTTTGct  
cgagctggcgaattcc  
>CD\_NM\_014219.1:804  
CgCctGcgagtctGGtatGCTCATCGCTGGTGCTCCAACAATTCAGAGATTGTTGGAGCACCAGCGATGAATTTTTTGct  
cgagctggcgaattcc  
>CD\_NM\_014219.1:1007  
CgCctGcgagtctGGtatGCACGCGGAACTTCCAAATGCTGTTCAAGAGACAGCATTTGGAAGTTCCGCGTATTTTTTGct  
cgagctggcgaattcc  
>CD\_NM\_014219.1:655  
CgCctGcgagtctGGtatGACCACTGCTTGTTCGTTCATATTCAGAGATATGACAGAAACAAGCAGTGGTTTTTGct  
cgagctggcgaattcc  
>CD\_NM\_014511:720  
CgCctGcgagtctGGtatGACCAACAGATATCATCGTGTATTCAAGAGATACACGATGATATCTGTTGGGTTTTTGct  
cgagctggcgaattcc  
>CD\_NM\_014511:641  
CgCctGcgagtctGGtatGAAGGTGACATATGCACAGTTGATTCAAGAGATCAACTGTGCATATGTCACCTTTTTTGct  
cgagctggcgaattcc  
>CD\_NM\_014511.3:390

CgCtGcgagtctGGtatGACTTGTCTGTTCACAGGAACTTCAAGAGAGTTTCTGTGACAGAAACAAGCTTTTTGct  
cgagctggcgaattcc  
>CD\_NM\_014511.3:610  
CgCtGcgagtctGGtatGCGGGAGGACTCTGATGAACAAGTTCAAGAGACTTGTTCATCAGAGTCCCTTTTTGct  
cgagctggcgaattcc  
>CD\_NM\_014511.3:240  
CgCtGcgagtctGGtatGAACTTTGCACCTCATTTGGAGAGTTCAAGAGACTCTCCAATGAGGTGCAAAGTTTTTGct  
cgagctggcgaattcc  
>CD\_NM\_014511.3:215  
CgCtGcgagtctGGtatGCGCACAGAGAAGGGAAGTTTAATTCAAGAGATTAACTTCCCTTCTGTGCATTTTTGct  
cgagctggcgaattcc  
>CD\_NM\_014511.3:146  
CgCtGcgagtctGGtatGACCTGGTGAAATCAGAAGAGACTTCAAGAGAGTCTTCTGATTTACCAGGGTTTTGct  
cgagctggcgaattcc  
>CD\_NM\_014511.3:400  
CgCtGcgagtctGGtatGATCACAGGAAACCCTTCAAATATTCAAGAGATATTTGAAGGGTTTCTGTGACTTTTTGct  
cgagctggcgaattcc  
>CD\_NM\_014511.3:198  
CgCtGcgagtctGGtatGATTTACGACTTCCCTTCTGCACTTCAAGAGAGTGCAGAAGGAAGTGTGAACTTTTTGct  
cgagctggcgaattcc  
>CD\_NM\_014511.3:720  
CgCtGcgagtctGGtatGACCAACAGATATCATCGTGTACTTCAAGAGAGTACACGATGATATCTGTTGGTTTTGct  
cgagctggcgaattcc  
>CD\_NM\_014511.3:176  
CgCtGcgagtctGGtatGCGCAATGTTGGTCAGATGTCAGTTCAAGAGACTGACATCTGACCAACATTGCATTTTTGct  
cgagctggcgaattcc  
>CD\_NM\_014511.3:39  
CgCtGcgagtctGGtatGATCGCTCATGGTCGTCAGCATGTTCAAGAGACATGCTGACGACCATGAGCGACTTTTTGct  
cgagctggcgaattcc  
>CD\_NM\_014511.3:739  
CgCtGcgagtctGGtatGCACACGGAACCTCAAATGCTGTTCAAGAGACAGCATTGGAAGTTCCGTGTATTTTTGct  
cgagctggcgaattcc  
>CD\_NM\_014511.3:328  
CgCtGcgagtctGGtatGCACAGATGCTACGGTCTGTTATTCAAGAGATAACAGAACCGTAGCATCTGTATTTTTGct  
cgagctggcgaattcc  
>CD\_NM\_014511.3:564  
CgCtGcgagtctGGtatGCGCTGTTGTAATGGACCAAGAGTTCAAGAGACTCTTGGTCCATTACAACAGCATTTTTTGct  
cgagctggcgaattcc  
>CD\_NM\_014511.3:159  
CgCtGcgagtctGGtatGCGAAGAGACAGTCATCCTGCAATTCAAGAGATTGCAGGATGACTGTCTTCTTTTTGct  
cgagctggcgaattcc  
>CD\_NM\_014511.3:492  
CgCtGcgagtctGGtatGATCAGTGGTCATCATCCTTCTTCAAGAGAGAAGAGGATGATGACCACTGAGTTTTGct  
cgagctggcgaattcc  
>CD\_NM\_014511.3:388  
CgCtGcgagtctGGtatGATGCTTGTCTGTTCACAGGAATTCAAGAGATTCTGTGACAGAAACAAGCAGTTTTGct  
cgagctggcgaattcc  
>CD\_NM\_014511.3:291  
CgCtGcgagtctGGtatGATCCATCGGTCCCATGATGCAATTCAAGAGATTGCATCATGGGACCGATGGAGTTTTGct  
cgagctggcgaattcc  
>CD\_NM\_014511.3:536  
CgCtGcgagtctGGtatGCTCATCGCTGGTGTGCAACAATTCAAGAGATTGTTGCAGCACCAGCGATGAATTTTTGct  
cgagctggcgaattcc  
>CD\_NM\_014511.3:294

CgCctGcgagtctGGtatGAATCGGTCCCATGATGCAAGACTTCAAGAGAGTCTTGCATCATGGGACCGATGTTTTTGct  
cgagctggcgaattcc  
>CD\_NM\_014511.3:645  
CgCctGcgagtctGGtatGAACATATGCACAGTTGAATCACTTCAAGAGAGTGATTCAACTGTGCATATGTCTTTTTTGct  
cgagctggcgaattcc  
>CD\_NM\_014511.3:59  
CgCctGcgagtctGGtatGCGGTGTGTGTTGGGTTCTTCTTTTTCAAGAGAAAGAAGAACCCAACACACACCATTTTTTGct  
cgagctggcgaattcc  
>CD\_NM\_014511.3:607  
CgCctGcgagtctGGtatGCACAGGGAGGACTCTGATGAACTTCAAGAGAGTTCATCAGAGTCCCTCCCTGTTTTTTTTGct  
cgagctggcgaattcc  
>CD\_NM\_014511.3:221  
CgCctGcgagtctGGtatGAAGAAGGGAAGTTTAAGGACACTTCAAGAGAGTGTCTTAACTTCCCTTCTTTTTTGct  
cgagctggcgaattcc  
>CD\_NM\_014511.3:693  
CgCctGcgagtctGGtatGCCGCCCTTCTCAGAGGCCCAAGTTCAAGAGACTTGGGCCTCTGAGAAGGGCGATTTTTTGct  
cgagctggcgaattcc  
>CD\_NM\_014511.3:641  
CgCctGcgagtctGGtatGCGGTGACATATGCACAGTTGAATTCAAGAGATTCAACTGTGCATATGTCACCTTTTTTGct  
cgagctggcgaattcc  
>CD\_NM\_014511.3:581  
CgCctGcgagtctGGtatGCAGAGCCTGCAGGGAACAGAACTTCAAGAGAGTCTGTTCCCTGCAGGCTTTTTTTTTGct  
cgagctggcgaattcc  
>CD\_NM\_014511.3:643  
CgCctGcgagtctGGtatGATGACATATGCACAGTTGAATCTTCAAGAGAGATTCAACTGTGCATATGTCACCTTTTTTGct  
cgagctggcgaattcc  
>CD\_NM\_014511.3:272  
CgCctGcgagtctGGtatGAGGTCTCCAAGGCCAACTTCTCTTCAAGAGAGAGAAGTTGGCCTTGGAGACCCTTTTTTGct  
cgagctggcgaattcc  
>CD\_NM\_014511.3:378  
CgCctGcgagtctGGtatGAAGTGACCCACTGCTTGTTCCTTTCAAGAGAAGAAACAAGCAGTGGGTCACTTTTTTGct  
cgagctggcgaattcc  
>CD\_NM\_014511.3:697  
CgCctGcgagtctGGtatGACTTCTCAGAGGCCCAAGACACTTCAAGAGAGTGTCTTGGGCCTCTGAGAAGTTTTTGct  
cgagctggcgaattcc  
>CD\_NM\_014511.3:186  
CgCctGcgagtctGGtatGATCAGATGTCAGGTTTCAGCACTTCAAGAGAGTGTGAAACCTGACATCTGACTTTTTTGct  
cgagctggcgaattcc  
>CD\_NM\_002255.3:679  
CgCctGcgagtctGGtatGACCTGTTTCTGTACAGGAACTTCAAGAGAGTTTCTGTGACAGAAACAGGCTTTTTTGct  
cgagctggcgaattcc  
>CD\_NM\_002255.3:760  
CgCctGcgagtctGGtatGACTGCATGCTGTGATTAGGTACTTCAAGAGAGTACCTAATCACAGCATGCAGGTTTTTGct  
cgagctggcgaattcc  
>CD\_NM\_002255.3:1089  
CgCctGcgagtctGGtatGCGGCCTTGATGGGATCTTCTAGTTCAAGAGACTAGAAGATCCCATCAAGGCCTTTTTTGct  
cgagctggcgaattcc  
>CD\_NM\_002255.3:899  
CgCctGcgagtctGGtatGCGGGAGGACTCTGATGAACAAGTTCAAGAGACTTGTTCATCAGAGTCCCTCCCTTTTTTGct  
cgagctggcgaattcc  
>CD\_NM\_002255.3:999  
CgCctGcgagtctGGtatGACAAGAGACCCCTCAACAGATACTTCAAGAGAGTATCTGTTGAGGGTCTTGTCTTTTTTGct  
cgagctggcgaattcc  
>CD\_NM\_002255.3:244

CgCctGcgagtctGGtatGACCTGTCCCTGAGCTCTACAACCTCAAGAGAGTTGTAGAGCTCAGGGACAGGGTTTTTGct  
cgagctggcgaattcc  
>CD\_NM\_002255.3:677  
CgCctGcgagtctGGtatGATGCCTGTTTCTGTACAGGAATTCAGAGATTCCTGTGACAGAAACAGGCAGTTTTTGct  
cgagctggcgaattcc  
>CD\_NM\_002255.3:261  
CgCctGcgagtctGGtatGCCAACAGAAATATCTGGAACAGTTCAAGAGACTGTTCCAGAATATCTGTGTTTTTTGct  
cgagctggcgaattcc  
>CD\_NM\_002255.3:786  
CgCctGcgagtctGGtatGCGGCCATCATCCTCTTACCATTTCAAGAGAATGGTGAAGAGGATGATGGCCATTTTTGct  
cgagctggcgaattcc  
>CD\_NM\_002255.3:781  
CgCctGcgagtctGGtatGATCAGTGGCCATCATCCTCTTCAAGAGAGAAGAGGATGATGGCCACTGAGTTTTTGct  
cgagctggcgaattcc  
>CD\_NM\_002255.3:49  
CgCctGcgagtctGGtatGATCACCCACGGTCATCATCCTGTTCAAGAGACAGGATGATGACCGTGGGTGACTTTTTGct  
cgagctggcgaattcc  
>CD\_NM\_002255.3:1132  
CgCctGcgagtctGGtatGCACCCAGCTTGCCAGCTCTAATTTCAAGAGAATTAGAGCTGGCAAGCTGGGTTTTTTGct  
cgagctggcgaattcc  
>CD\_NM\_002255.3:73  
CgCctGcgagtctGGtatGCTGTCTTGGGTTCTTCTTGGACTTCAAGAGAGTCCAAGAAGAACCCAAGACATTTTTGct  
cgagctggcgaattcc  
>CD\_NM\_002255.3:462  
CgCctGcgagtctGGtatGCCGTGACCTTGTCTGCAGCTCTTCAAGAGAGAGCTGCAGGACAAGGTCACGTTTTTTGct  
cgagctggcgaattcc  
>CD\_NM\_002255.3:214  
CgCctGcgagtctGGtatGAATCTTACGCTGTACAAGAAATTCAGAGATTTCTTGTACAGCGTGAAGATGTTTTTGct  
cgagctggcgaattcc  
>CD\_NM\_002255.3:1012  
CgCctGcgagtctGGtatGCACAGATACCAGCGTGTGTATATTCAGAGATATACACACGCTGGTATCTGTTTTTTGct  
cgagctggcgaattcc  
>CD\_NM\_002255.3:853  
CgCctGcgagtctGGtatGCGCTGCTGTAATGAACCAAGAGTTCAAGAGACTCTTGGTTCATTACAGCAGCATTTTTGct  
cgagctggcgaattcc  
>CD\_NM\_002255.3:148  
CgCctGcgagtctGGtatGACCCAGCGCTGTGGTGCCTCAATTCAGAGATTGAGGCACCACAGCGCTGGGCTTTTTGct  
cgagctggcgaattcc  
>CD\_NM\_002255.3:393  
CgCctGcgagtctGGtatGCGGTACAGGTCTATATGAGAATTCAGAGATTCTCATATAGACCTGTGACCATTTTTGct  
cgagctggcgaattcc  
>CD\_NM\_002255.3:1069  
CgCctGcgagtctGGtatGCGCCCATGAGCACCACAGTCAGTTCAAGAGACTGACTGTGGTGCTCATGGGCATTTTTGct  
cgagctggcgaattcc  
>CD\_NM\_002255.3:982  
CgCctGcgagtctGGtatGCGGCCCTTCTCAGAGGAGCAAGTTCAAGAGACTTGCTCCTCTGAGAAGGGCCATTTTTGct  
cgagctggcgaattcc  
>CD\_NM\_002255.3:720  
CgCctGcgagtctGGtatGAACCCACTGAACCAAGCTTCAATTCAGAGATTGAAGCTTGGTTCAGTGGGTGTTTTGct  
cgagctggcgaattcc  
>CD\_NM\_002255.3:603  
CgCctGcgagtctGGtatGACCACGGAGAGACCTACAGATGTTCAAGAGACATCTGTAGGTCTCTCCGTGGGTTTTGct  
cgagctggcgaattcc  
>CD\_NM\_002255.3:395

CgCctGcgagtctGGtatGATCACAGGTCTATATGAGAACTTCAAGAGAGTTTCTCATATAGACCTGTGACTTTTTTGct  
cgagctggcgaattcc  
>CD\_NM\_002255.3:787  
CgCctGcgagtctGGtatGAGCCATCATCTCTTACCATCTTCAAGAGAGATGGTGAAGAGGATGATGGCCTTTTTTGct  
cgagctggcgaattcc  
>CD\_NM\_002255.3:689  
CgCctGcgagtctGGtatGATCACAGGAAACCCTTCTAGTATTCAAGAGATACTAGAAGGGTTTCTGTGACTTTTTTGct  
cgagctggcgaattcc  
>CD\_NM\_002255.3:870  
CgCctGcgagtctGGtatGCAGAGCCTGCGGGACACAGAACTTCAAGAGAGTTCTGTGTCCCGCAGGCTCTTTTTTTGct  
cgagctggcgaattcc  
>CD\_NM\_002255.3:1154  
CgCctGcgagtctGGtatGATACCAGCAGCTGGAATCTGAATTCAAGAGATTCAGATTCCAGCTGCTGGTACTTTTTTGct  
cgagctggcgaattcc  
>CD\_NM\_002255.3:270  
CgCctGcgagtctGGtatGCATTCTGGAACAGTTTCTCATTTCATTTCAAGAGAATGAGGAACTGTTCCAGAATTTTTTGct  
cgagctggcgaattcc  
>CD\_NM\_002255.3:896  
CgCctGcgagtctGGtatGCACAGGGAGGACTCTGATGAACTTCAAGAGAGTTCATCAGAGTCTCCCTGTTTTTTTGct  
cgagctggcgaattcc  
>CD\_NM\_002255.3:246  
CgCctGcgagtctGGtatGATGTCCCTGAGCTCTACAACAGTTCAAGAGACTGTTGTAGAGCTCAGGGACAGTTTTTGct  
cgagctggcgaattcc  
>CD\_NM\_002255.3:480  
CgCctGcgagtctGGtatGACTCCCAGAGCTCCTTTGACATTTCAAGAGAATGTCAAAGGAGCTCTGGGAGCTTTTTTGct  
cgagctggcgaattcc  
>CD\_NM\_002255.3:309  
CgCctGcgagtctGGtatGAACACGCAGGGACCTACAGATGTTCAAGAGACATCTGTAGGTCCCTGCGTGTTTTTTGct  
cgagctggcgaattcc  
>CD\_NM\_012314:35  
CgCctGcgagtctGGtatGCTGGCGTGTGTTGGGTTCTTCTTTCAAGAGAAGAAGAACCAACACACGCCATTTTTTGct  
cgagctggcgaattcc  
>CD\_NM\_014512.1:660  
CgCctGcgagtctGGtatGACTTGTCTGTACAGGAACTTCAAGAGAGTTTCTGTGACAGAAACAAGCTTTTTTGct  
cgagctggcgaattcc  
>CD\_NM\_014512.1:880  
CgCctGcgagtctGGtatGCGCGAGGATTCCTGATGAACAAGTTCAAGAGACTTGTTCATCAGAATCCTCGCTTTTTTGct  
cgagctggcgaattcc  
>CD\_NM\_014512.1:162  
CgCctGcgagtctGGtatGATCAGATGTCATGTTTGAACACTTCAAGAGAGTGTCAAACATGACATCTGACTTTTTTGct  
cgagctggcgaattcc  
>CD\_NM\_014512.1:877  
CgCctGcgagtctGGtatGCACAGCGAGGATTCCTGATGAACTTCAAGAGAGTTCATCAGAATCCTCGCTTTTTTTTGct  
cgagctggcgaattcc  
>CD\_NM\_014512.1:216  
CgCctGcgagtctGGtatGAACTTTGCGCCTCATTGGAGAATTCAAGAGATTCCTCAATGAGGCGCAAAGTTTTTTGct  
cgagctggcgaattcc  
>CD\_NM\_014512.1:461  
CgCctGcgagtctGGtatGACTCCCGGAGCTCCTATGACATTTCAAGAGAATGTCATAGGAGCTCCGGGAGCTTTTTTGct  
cgagctggcgaattcc  
>CD\_NM\_014512.1:122  
CgCctGcgagtctGGtatGACCTGGTGAATCAGAAGAGACTTCAAGAGAGTCTTCTGATTTACCAGGCTTTTTTGct  
cgagctggcgaattcc  
>CD\_NM\_014512.1:610

CgCtGcgagtctGGtatGAGCTCTTCCGTGACTCTCCATTTCAAGAGAATGGAGAGTCACGGAAAGAGCCTTTTTGct  
cgagctggcgaattcc  
>CD\_NM\_014512.1:360  
CgCtGcgagtctGGtatGACCTCTGGACATCGTGATCATATTTCAAGAGATATGATCACGATGTCCAGAGGGTTTTGct  
cgagctggcgaattcc  
>CD\_NM\_014512.1:670  
CgCtGcgagtctGGtatGATCACAGGAAACCCTTCAAATATTTCAAGAGATATTTGAAGGGTTTCTGTGACTTTTTGct  
cgagctggcgaattcc  
>CD\_NM\_014512.1:15  
CgCtGcgagtctGGtatGATCGCTCACGGTCGTCAGCATGTTCAAGAGACATGCTGACGACCGTGAGCGACTTTTTGct  
cgagctggcgaattcc  
>CD\_NM\_014512.1:905  
CgCtGcgagtctGGtatGCTCAGGAGGTGTCATACGCATATTTCAAGAGATATGCGTATGACACCTCCTGATTTTTGct  
cgagctggcgaattcc  
>CD\_NM\_014512.1:267  
CgCtGcgagtctGGtatGATCCATCAGTCGCATGAAGCAATTTCAAGAGATTGCTTCATGCGACTGATGGAGTTTTGct  
cgagctggcgaattcc  
>CD\_NM\_014512.1:117  
CgCtGcgagtctGGtatGCGGTGCGCTGGTGAAATCAGAATTTCAAGAGATTCTGATTTACCAGGCGACCTTTTTGct  
cgagctggcgaattcc  
>CD\_NM\_014512.1:152  
CgCtGcgagtctGGtatGCGCAATGTTGGTCAGATGTCATTTCAAGAGAATGACATCTGACCAACATTGCATTTTTGct  
cgagctggcgaattcc  
>CD\_NM\_014512.1:443  
CgCtGcgagtctGGtatGCTGTGACCTTGTCTGCAGCTCTTCAAGAGAGAGCTGCAGGACAAGGTCACATTTTTGct  
cgagctggcgaattcc  
>CD\_NM\_014512.1:622  
CgCtGcgagtctGGtatGAACTCTCCATACGAGTGGTCAATTTCAAGAGATTGACCACTCGTATGGAGAGTCTTTTTGct  
cgagctggcgaattcc  
>CD\_NM\_014512.1:159  
CgCtGcgagtctGGtatGCTGGTCAGATGTCATGTTTGAATTTCAAGAGATTCAAACATGACATCTGACCAATTTTTGct  
cgagctggcgaattcc  
>CD\_NM\_014512.1:304  
CgCtGcgagtctGGtatGCACAGATGCTACGGTCTGTTATTTCAAGAGATAACAGAACCGTAGCATCTGTATTTTTGct  
cgagctggcgaattcc  
>CD\_NM\_014512.1:135  
CgCtGcgagtctGGtatGCGAAGAGACAGTCATCCTGCAATTTCAAGAGATTGCAGGATGACTGTCTCTTTTTGct  
cgagctggcgaattcc  
>CD\_NM\_014512.1:354  
CgCtGcgagtctGGtatGAAGTGACCCTCTGGACATCGTGTTCAAGAGACACGATGTCCAGAGGGTCACTGTTTTGct  
cgagctggcgaattcc  
>CD\_NM\_014512.1:658  
CgCtGcgagtctGGtatGATGCTTGTCTGTACAGGAATTTCAAGAGATTCCTGTGACAGAAACAAGCAGTTTTGct  
cgagctggcgaattcc  
>CD\_NM\_014512.1:530  
CgCtGcgagtctGGtatGAAGGGACCAAGGTCAACGGAATTTCAAGAGAGTTCCGTTGACCTTGGTCCCTGTTTTGct  
cgagctggcgaattcc  
>CD\_NM\_014512.1:777  
CgCtGcgagtctGGtatGACCTTTCACCATCCTCCTCTTCTTCAAGAGAGAAGAGGAGGATGGTGAAAGGGTTTTGct  
cgagctggcgaattcc  
>CD\_NM\_014512.1:806  
CgCtGcgagtctGGtatGCTCATCGCTGGTGCTCCGACAATTTCAAGAGATTGTCGAGCACCAGCGATGAATTTTTGct  
cgagctggcgaattcc  
>CD\_NM\_014512.1:834

CgCctGcgagtctGGtatGCGCTGCTGTAATGGACCAAGAGTTCAAGAGACTCTTGGTCCATTACAGCAGCATT TTTTGct  
cgagctggcgaattcc  
>CD\_NM\_014512.1:35  
CgCctGcgagtctGGtatGCGGCGTGTGTTGGGTTCTTCTTTTCAAGAGAAAGAAGAACCCAACACACGCCATT TTTTGct  
cgagctggcgaattcc  
>CD\_NM\_014512.1:616  
CgCctGcgagtctGGtatGCTCCGTGACTCTCCATACGAGTTTCAAGAGAACTCGTATGGAGAGTCACGGAAT TTTTGct  
cgagctggcgaattcc  
>CD\_NM\_014512.1:851  
CgCctGcgagtctGGtatGCAGAGCCTGCAGGGAACAGAACTTCAAGAGAGTCTGTTCCTGCAGGCTCTTT TTTTGct  
cgagctggcgaattcc  
>CD\_NM\_014512.1:290  
CgCctGcgagtctGGtatGCCCTGGCAGGGACCTACAGATGTTCAAGAGACATCTGTAGGTCCCTGCCAGG TTTTTTGct  
cgagctggcgaattcc  
>CD\_NM\_014512.1:468  
CgCctGcgagtctGGtatGAAGCTCCTATGACATGTACCATTTCAAGAGAATGGTACATGTCATAGGAGCT CTTTTTGct  
cgagctggcgaattcc  
>CD\_NM\_014512.1:214  
CgCctGcgagtctGGtatGAACACTTTGCGCCTCATTGGAGTTCAAGAGACTCCAATGAGGCGCAAAGTGT CTTTTTGct  
cgagctggcgaattcc  
>CD\_NM\_012314:41  
CgCctGcgagtctGGtatGCTGGCGTGTGTTGGGTTCTTCTTTTCAAGAGAAAGAAGAACCCAACACACG CCAATTTTTTGct  
cgagctggcgaattcc  
>CD\_NM\_012312.1:666  
CgCctGcgagtctGGtatGACTTGTTTCTGTCCACAGGAACTTCAAGAGAGTTTCTGTGACAGAAACAAGC TTTTTTGct  
cgagctggcgaattcc  
>CD\_NM\_012312.1:222  
CgCctGcgagtctGGtatGAACTTTGCACCTCATTGGAGAGTTCAAGAGACTCTCCAATGAGGTGCAAAGT GTTTTTTGct  
cgagctggcgaattcc  
>CD\_NM\_012312.1:886  
CgCctGcgagtctGGtatGCGCGAGGATTTCTGATGAACAAGTTCAAGAGACTTGTTCATCAGAATCCTC GCTTTTTTGct  
cgagctggcgaattcc  
>CD\_NM\_012312.1:883  
CgCctGcgagtctGGtatGCACAGCGAGGATTTCTGATGAACTTCAAGAGAGTTCATCAGAATCCTCGCT GTTTTTTGct  
cgagctggcgaattcc  
>CD\_NM\_012312.1:628  
CgCctGcgagtctGGtatGAACTCTCCCTATGAGTGGTCAATTTCAAGAGATTGACCACTCATAGGGAGAG TCTTTTTTGct  
cgagctggcgaattcc  
>CD\_NM\_012312.1:467  
CgCctGcgagtctGGtatGACTCCCGGAGCTCCTATGACATTTCAAGAGAATGTCATAGGAGCTCCGGGAG CTTTTTGct  
cgagctggcgaattcc  
>CD\_NM\_012312.1:128  
CgCctGcgagtctGGtatGACCTGGTGAAATCAGAAGAGACTTCAAGAGAGTCTTCTTCTGATTTTACCAG GGTTTTTGct  
cgagctggcgaattcc  
>CD\_NM\_012312.1:676  
CgCctGcgagtctGGtatGATCACAGGAAACCCTTCAAATATTCAAGAGATATTTGAAGGGTTTCTGTGAC TTTTTTGct  
cgagctggcgaattcc  
>CD\_NM\_012312.1:180  
CgCctGcgagtctGGtatGATTTGAGCACTTCTTCTGCACTTCAAGAGAGTGCAGAAGGAAGTGCTCAAAC TTTTTTGct  
cgagctggcgaattcc  
>CD\_NM\_012312.1:911  
CgCctGcgagtctGGtatGCTCAGGAGGTGTCATACGCATATTTCAAGAGATATGCGTATGACACCTCCTG ATTTTTTGct  
cgagctggcgaattcc  
>CD\_NM\_012312.1:158

CgCctGcgagtctGGtatGCGCAATGTTGGTCAGATGTCAGTTCAAGAGACTGACATCTGACCAACATTGCATTTTTTGct  
cgagctggcgaattcc  
>CD\_NM\_012312.1:630  
CgCctGcgagtctGGtatGATCTCCCTATGAGTGGTCAAACCTTCAAGAGAGTTTGACCACTCATAGGGAGAGTTTTTGct  
cgagctggcgaattcc  
>CD\_NM\_012312.1:21  
CgCctGcgagtctGGtatGATCGCTCATGGTCGTCAGCATGTTCAAGAGACATGCTGACGACCATGAGCGACTTTTTTGct  
cgagctggcgaattcc  
>CD\_NM\_012312.1:419  
CgCctGcgagtctGGtatGACGTGACCTTGTCTGCAGCTCTTCAAGAGAGAGCTGCAGGACAAGGTCACGCTTTTTTGct  
cgagctggcgaattcc  
>CD\_NM\_012312.1:310  
CgCctGcgagtctGGtatGCACAGATGCTACGGTCTGTATTCAAGAGATAACAGAACCGTAGCATCTGTATTTTTTGct  
cgagctggcgaattcc  
>CD\_NM\_012312.1:141  
CgCctGcgagtctGGtatGCGAAGAGACAGTCATCCTGCAATTCAAGAGATTGCAGGATGACTGTCTCTTTTTTGct  
cgagctggcgaattcc  
>CD\_NM\_012312.1:360  
CgCctGcgagtctGGtatGAAGTGACCCCTGGACATCGTCTTCAAGAGAGACGATGTCCAGAGGGTCACTGTTTTTGct  
cgagctggcgaattcc  
>CD\_NM\_012312.1:664  
CgCctGcgagtctGGtatGATGCTTGTCTGTACAGGAATTCAAGAGATTCTGTGACAGAAACAAGCAGTTTTTGct  
cgagctggcgaattcc  
>CD\_NM\_012312.1:273  
CgCctGcgagtctGGtatGATCCATCGGTCCCATGATGCAATTCAAGAGATTGCATCATGGGACCGATGGAGTTTTTGct  
cgagctggcgaattcc  
>CD\_NM\_012312.1:276  
CgCctGcgagtctGGtatGAATCGGTCCCATGATGCAAGACTTCAAGAGAGTCTTGCATCATGGGACCGATGTTTTTGct  
cgagctggcgaattcc  
>CD\_NM\_012312.1:382  
CgCctGcgagtctGGtatGCTCACAGGTCTATATGAGAACTTCAAGAGAGTTTCTCATATAGACCTGTGATTTTTTGct  
cgagctggcgaattcc  
>CD\_NM\_012312.1:812  
CgCctGcgagtctGGtatGCTCATCGCTGGTGTCCAACAATTCAAGAGATTGTTGGAGCACCAGCGATGAATTTTTTGct  
cgagctggcgaattcc  
>CD\_NM\_012312.1:783  
CgCctGcgagtctGGtatGACCTTTCACCATCCTCCTCTTCAAGAGAGAAGAGGAGGATGGTGAAAGGGTTTTTGct  
cgagctggcgaattcc  
>CD\_NM\_012312.1:632  
CgCctGcgagtctGGtatGATCCCTATGAGTGGTCAAACCTTCAAGAGAGAGTTTGACCACTCATAGGGAGTTTTTGct  
cgagctggcgaattcc  
>CD\_NM\_012312.1:840  
CgCctGcgagtctGGtatGCGCTGCTGTAATGGACCAAGAGTTCAAGAGACTCTTGGTCCATTACAGCAGCATTTTTTGct  
cgagctggcgaattcc  
>CD\_NM\_012312.1:41  
CgCctGcgagtctGGtatGCGGCGTGTGTTGGGTTCTTCTTTTCAAGAGAAAGAAGAACCCAACACACGCCATTTTTTGct  
cgagctggcgaattcc  
>CD\_NM\_012312.1:857  
CgCctGcgagtctGGtatGCAGAGCCTGCAGGGAACAGAACTTCAAGAGAGTCTGTTCCCTGCAGGCTTTTTTTGct  
cgagctggcgaattcc  
>CD\_NM\_012312.1:474  
CgCctGcgagtctGGtatGAAGCTCCTATGACATGTACCATTTCAAGAGAATGGTACATGTCATAGGAGCTTTTTTGct  
cgagctggcgaattcc  
>CD\_NM\_012312.1:254



CgCctGcgagtctGGtatGAGGTCTCCAAGGCCAACTTCTCTTCAAGAGAGAGAAGTTGGCCTTGGAGACCCTTTTTGct  
cgagctggcgaattcc  
>CD\_NM\_012312.1:356  
CgCctGcgagtctGGtatGATCCCAGTGACCTCTGGACATTTCAAGAGAATGTCCAGAGGGTCACTGGGAGTTTTTGct  
cgagctggcgaattcc  
>CD\_NM\_012312.1:168  
CgCctGcgagtctGGtatGATCAGATGTCAGGTTTGGACTTCAAGAGAGTGTCAAACCTGACATCTGACTTTTTTGct  
cgagctggcgaattcc  
>CD\_NM\_012312.1:413  
CgCctGcgagtctGGtatGAAGAGAGCGTGACCTTGTCTGTTCGAAGAGACAGGACAAGGTCACGCTCTCTTTTTTGct  
cgagctggcgaattcc  
>CD\_NM\_012313.1:658  
CgCctGcgagtctGGtatGACTTGTCTGTTCACAGGAACTTCAAGAGAGTTTCTGTGACAGAAAACAAGCTTTTTTGct  
cgagctggcgaattcc  
>CD\_NM\_012313.1:459  
CgCctGcgagtctGGtatGACTCCTGGAGCTCCTATGACATTTCAAGAGAATGTCATAGGAGCTCCAGGAGCTTTTTTGct  
cgagctggcgaattcc  
>CD\_NM\_012313.1:214  
CgCctGcgagtctGGtatGAACTTTGCGCCTCATTGGAGAGTTCAAGAGACTCTCCAATGAGGCGCAAAGTTTTTTGct  
cgagctggcgaattcc  
>CD\_NM\_012313.1:875  
CgCctGcgagtctGGtatGCACAGGGAGGATTCTGACGAACTTCAAGAGAGTTTCGTGAGAATCCTCCCTGTTTTTTTGct  
cgagctggcgaattcc  
>CD\_NM\_012313.1:120  
CgCctGcgagtctGGtatGACCTGGTGAAATCAGAAGAGACTTCAAGAGAGTCTCTTCTGATTTACCAGGCTTTTTTGct  
cgagctggcgaattcc  
>CD\_NM\_012313.1:13  
CgCctGcgagtctGGtatGATCGCTCATGGTCATCAGCATGTTCAAGAGACATGCTGATGACCATGAGCGACTTTTTTGct  
cgagctggcgaattcc  
>CD\_NM\_012313.1:160  
CgCctGcgagtctGGtatGATCAGATGTCATGTTTGGACTTCAAGAGAGTGTCAAACATGACATCTGACTTTTTTGct  
cgagctggcgaattcc  
>CD\_NM\_012313.1:668  
CgCctGcgagtctGGtatGATCACAGGAAACCCTTCAAATATTTCAAGAGATATTTGAAGGGTTTCTGTGACTTTTTTGct  
cgagctggcgaattcc  
>CD\_NM\_012313.1:172  
CgCctGcgagtctGGtatGATTTGAGCACTTCTTCTGCACTTCAAGAGAGTGCAGAAGGAAGTGTCAAACTTTTTGct  
cgagctggcgaattcc  
>CD\_NM\_012313.1:903  
CgCctGcgagtctGGtatGCTCAGGAGGTGTCATACGCATATTTCAAGAGATATGCGTATGACACCTCCTGATTTTTTGct  
cgagctggcgaattcc  
>CD\_NM\_012313.1:115  
CgCctGcgagtctGGtatGCGGTGCGCTGGTGAAATCAGAATTCAAGAGATTCTGATTTACCAGGCGACCTTTTTTGct  
cgagctggcgaattcc  
>CD\_NM\_012313.1:150  
CgCctGcgagtctGGtatGCGCAATGTTGGTCAGATGTCATTTCAAGAGAATGACATCTGACCAACATTCATTTTTTGct  
cgagctggcgaattcc  
>CD\_NM\_012313.1:411  
CgCctGcgagtctGGtatGACGTGACCTTGTCTGCAGCTCTTCAAGAGAGAGCTGCAGGACAAGGTCACGCTTTTTTGct  
cgagctggcgaattcc  
>CD\_NM\_012313.1:157  
CgCctGcgagtctGGtatGCTGGTCAGATGTCATGTTTGGAGTTCAAGAGACTCAAACATGACATCTGACCAATTTTTTGct  
cgagctggcgaattcc  
>CD\_NM\_012313.1:302

CgCctGcgagtctGGtatGCACAGATGCTACGGTCTGTTCTTCAAGAGAGAACAGAACCGTAGCATCTGTATTTTTGct  
cgagctggcgaattcc  
>CD\_NM\_012313.1:133  
CgCctGcgagtctGGtatGCGAAGAGACAGTCATCCTGCAATTC AAGAGATTGCAGGATGACTGTCTCTTCTTTTTGct  
cgagctggcgaattcc  
>CD\_NM\_012313.1:352  
CgCctGcgagtctGGtatGAAGTGACCCCTCTGGACATCGTGTTC AAGAGACACGATGTCCAGAGGGTCACTGTTTTGct  
cgagctggcgaattcc  
>CD\_NM\_012313.1:656  
CgCctGcgagtctGGtatGATGCTTGTCTGTACAGGAATTC AAGAGATTCCTGTGACAGAAACAAGCAGTTTTGct  
cgagctggcgaattcc  
>CD\_NM\_012313.1:765  
CgCctGcgagtctGGtatGCGGTCAAACCTCCCTTTCACCATTTCAAGAGAATGGTGAAAGGGAGTTTGACCATTTTTGct  
cgagctggcgaattcc  
>CD\_NM\_012313.1:374  
CgCctGcgagtctGGtatGCTCACAGGTCTATATGAGAACTTCAAGAGAGTTTCTCATATAGACCTGTGATTTTTGct  
cgagctggcgaattcc  
>CD\_NM\_012313.1:265  
CgCctGcgagtctGGtatGATCCATCGGTTCGCATGAGGCAATTC AAGAGATTGCCTCATGCGACCGATGGAGTTTTGct  
cgagctggcgaattcc  
>CD\_NM\_012313.1:626  
CgCctGcgagtctGGtatGACCTACGAGTGGTCAAAGTCAATTC AAGAGATTGACTTTGACCACTCGTAGGGTTTTGct  
cgagctggcgaattcc  
>CD\_NM\_012313.1:775  
CgCctGcgagtctGGtatGACCTTTCACCATCCTCCTCTTCTTCAAGAGAGAAGAGGAGGATGGTGAAAGGGTTTTGct  
cgagctggcgaattcc  
>CD\_NM\_012313.1:804  
CgCctGcgagtctGGtatGCTCATCGCTGGTGTCCGACAATTC AAGAGATTGTCCGAGCACCAGCGATGAATTTTTGct  
cgagctggcgaattcc  
>CD\_NM\_012313.1:620  
CgCctGcgagtctGGtatGAACTCTCCCTACGAGTGGTCAAATTC AAGAGATTGACCACTCGTAGGGAGAGTCTTTTTGct  
cgagctggcgaattcc  
>CD\_NM\_012313.1:886  
CgCctGcgagtctGGtatGCTCTGACGAACAGGACCATCAGTTCAAGAGACTGATGGTCTGTTCGTCAGAATTTTTGct  
cgagctggcgaattcc  
>CD\_NM\_012313.1:622  
CgCctGcgagtctGGtatGATCTCCCTACGAGTGGTCAAAGTTCAAGAGACTTTGACCACTCGTAGGGAGAGTTTTGct  
cgagctggcgaattcc  
>CD\_NM\_012313.1:288  
CgCctGcgagtctGGtatGCCCTGGCAGGGACCTACAGATGTTCAAGAGACATCTGTAGGTCCCTGCCAGGTTTTGct  
cgagctggcgaattcc  
>CD\_NM\_012313.1:466  
CgCctGcgagtctGGtatGAAGCTCCTATGACATGTACCATTTCAAGAGAATGGTACATGTCATAGGAGCTCTTTTTGct  
cgagctggcgaattcc  
>CD\_NM\_012313.1:450  
CgCctGcgagtctGGtatGCGTCTGCAGCTCCTGGAGCTCTTCAAGAGAGAGCTCCAGGAGCTGCAGGACATTTTTGct  
cgagctggcgaattcc  
>CD\_NM\_012313.1:212  
CgCctGcgagtctGGtatGAACACTTTGCGCCTCATTGGAGTTCAAGAGACTCCAATGAGGCGCAAAGTGTCTTTTTGct  
cgagctggcgaattcc  
>CD\_NM\_012313.1:246  
CgCctGcgagtctGGtatGAGGTCTCCAAGGCCAACTTCTCTTCAAGAGAGAGAAGTTGGCCTTGGAGACCCTTTTTGct  
cgagctggcgaattcc  
>CD\_NM\_012313.1:219

CgCctGcgagtctGGtatGCGCGCCTCATTTGGAGAGCACATTTCAAGAGAATGTGCTCTCCAATGAGGCGCATTMTTGGct  
cgagctggcgaattcc  
>CD\_NM\_012314:393  
CgCctGcgagtctGGtatGCCCCCTCTGGACATGGTGATCATTTCAAGAGAATGATCACCATGTCCAGAGGGTTTTTTGGct  
cgagctggcgaattcc  
>CD\_NM\_012314:68  
CgCctGcgagtctGGtatGCTGGCGTGTGTTGGGTTCTTCTTTCAAGAGAAGAAGAACCCAACACACGCCATMTTMTTGGct  
cgagctggcgaattcc  
>CD\_NM\_012314:150  
CgCctGcgagtctGGtatGAAGGTCACCTGGTGAAATCAGATTCAAGAGATCTGATTTACCAGGTGACCTGTTTTTTGGct  
cgagctggcgaattcc  
>CD\_NM\_012314.2:249  
CgCctGcgagtctGGtatGAACTTTGCACCTCATTTGGAGAGTTCAAGAGACTCTCCAATGAGGTGCAAAGTGTTTTTTGGct  
cgagctggcgaattcc  
>CD\_NM\_012314.2:671  
CgCctGcgagtctGGtatGACTTGTTCGTCACAGGAACTTCAAGAGAGTTTCTGTGACGGAAACAAGCTMTTMTTGGct  
cgagctggcgaattcc  
>CD\_NM\_012314.2:150  
CgCctGcgagtctGGtatGCGGTACCTGGTGAAATCAGAATTCAGAGATTCTGATTTACCAGGTGACCTMTTMTTGGct  
cgagctggcgaattcc  
>CD\_NM\_012314.2:192  
CgCctGcgagtctGGtatGCTGGTCGGATGTCATGTTTGTGAGTTCAAGAGACTCAAACATGACATCCGACCAATMTTMTTGGct  
cgagctggcgaattcc  
>CD\_NM\_012314.2:48  
CgCctGcgagtctGGtatGATCGCTCATGGTCATCATCATGTTCAAGAGACATGATGATGACCATGAGCGACTMTTMTTGGct  
cgagctggcgaattcc  
>CD\_NM\_012314.2:155  
CgCctGcgagtctGGtatGCCCTGGTGAAATCAGAAGAGACTTCAAGAGAGTCTTCTTCTGATTTACCAGGTMTTMTTGGct  
cgagctggcgaattcc  
>CD\_NM\_012314.2:393  
CgCctGcgagtctGGtatGACCTCTGGACATGGTGATCATATTTCAAGAGATATGATCACCATGTCCAGAGGGTTTTTTGGct  
cgagctggcgaattcc  
>CD\_NM\_012314.2:681  
CgCctGcgagtctGGtatGATCACAGGAAACCCTTCAAATATTTCAAGAGATATTTGAAGGGTTTCTGTGACTMTTMTTGGct  
cgagctggcgaattcc  
>CD\_NM\_012314.2:207  
CgCctGcgagtctGGtatGATTTGAGCACTTCTTCTGCACTTCAAGAGAGTGCAGAAGGAAGTGCTCAAACMTTMTTGGct  
cgagctggcgaattcc  
>CD\_NM\_012314.2:195  
CgCctGcgagtctGGtatGATCGGATGTCATGTTTGTGAGCACTTCAAGAGAGTGCTCAAACATGACATCCGACTMTTMTTGGct  
cgagctggcgaattcc  
>CD\_NM\_012314.2:476  
CgCctGcgagtctGGtatGCTGTGACCTTGTCTGCAGCTCTTCAAGAGAGAGCTGCAGGACAAGGTCACATMTTMTTGGct  
cgagctggcgaattcc  
>CD\_NM\_012314.2:337  
CgCctGcgagtctGGtatGCACAGATGCTACGGTCTGTCTTCAAGAGAGAACAGAACCCTAGCATCTGTATMTTMTTGGct  
cgagctggcgaattcc  
>CD\_NM\_012314.2:387  
CgCctGcgagtctGGtatGAAGTGACCTCTGGACATGGTGTTCAAGAGACACCATGTCCAGAGGGTCACTGTTTTTTGGct  
cgagctggcgaattcc  
>CD\_NM\_012314.2:168  
CgCctGcgagtctGGtatGCGAAGAGACAGTCATCCTGCAATTTCAAGAGATTGCAGGATGACTGTCTTCTMTTMTTGGct  
cgagctggcgaattcc  
>CD\_NM\_012314.2:185

CgCctGcgagtctGGtatGCGCAATGTTGGTCGGATGTCATTTCAAGAGAATGACATCCGACCAACATTGCATTTTTTGct  
cgagctggcgaattcc  
>CD\_NM\_012314.2:595  
CgCctGcgagtctGGtatGACCACGGAGGGACCTACAGATGTTCAAGAGACATCTGTAGGTCCCTCCGTGGGTTTTTGct  
cgagctggcgaattcc  
>CD\_NM\_012314.2:135  
CgCctGcgagtctGGtatGATTCCTGGCCCTCCAGGTCACTTCAAGAGAGTGACCTGGGAGGGCCAGGAAGTTTTTGct  
cgagctggcgaattcc  
>CD\_NM\_012314.2:659  
CgCctGcgagtctGGtatGAAGTGATCCACTGCTTGTTCCTTCAAGAGAGGAAACAAGCAGTGGATCACTCTTTTTTGct  
cgagctggcgaattcc  
>CD\_NM\_012314.2:635  
CgCctGcgagtctGGtatGAGCTCCCTACGAGTGGTCAAACCTTCAAGAGAGTTTGACCACTCGTAGGGAGCGTTTTTGct  
cgagctggcgaattcc  
>CD\_NM\_012314.2:68  
CgCctGcgagtctGGtatGCGGCGTGTGTTGGGTTCTTCTTTTTCAAGAGAAAGAAGAACCCAACACACGCCATTTTTTGct  
cgagctggcgaattcc  
>CD\_NM\_012314.2:383  
CgCctGcgagtctGGtatGATCCCAGTGACCCTCTGGACATTTCAAGAGAATGTCCAGAGGGTCACTGGGAGTTTTTGct  
cgagctggcgaattcc  
>CD\_NM\_012314.2:170  
CgCctGcgagtctGGtatGCAGAGACAGTCATCCTGCAATGTTCAAGAGACATTGCAGGATGACTGTCTTTTTTTTGct  
cgagctggcgaattcc  
>CD\_NM\_012314.2:535  
CgCctGcgagtctGGtatGCCCTGCAGTGCGCAGCATCAATTTCAAGAGATTGATGCTGCGCACTGCAGGGATTTTTTGct  
cgagctggcgaattcc  
>CD\_NM\_012314.2:47  
CgCctGcgagtctGGtatGCGTCGCTCATGGTCATCATCATTTTCAAGAGAATGATGATGACCATGAGCGACATTTTTTGct  
cgagctggcgaattcc  
>CD\_NM\_012314.2:468  
CgCctGcgagtctGGtatGCGGAGAGAATGTGACCTTGTCTTCAAGAGAGGACAAGGTACATTTCTCTCTTTTTTTGct  
cgagctggcgaattcc  
>CD\_NM\_012314.2:712  
CgCctGcgagtctGGtatGAACCCACTGAACCAAGCTCCAATTTCAAGAGATTGGAGCTTGGTTCAGTGGGTGTTTTTGct  
cgagctggcgaattcc  
>CD\_NM\_012314.2:381  
CgCctGcgagtctGGtatGCGCTCCCAGTGACCCTCTGGACTTCAAGAGAGTCCAGAGGGTCACTGGGAGCTTTTTTTGct  
cgagctggcgaattcc  
>CD\_NM\_012314.2:633  
CgCctGcgagtctGGtatGAACGCTCCCTACGAGTGGTCAAATTTCAAGAGATTGACCACTCGTAGGGAGCGTCTTTTTTGct  
cgagctggcgaattcc  
>CD\_NM\_012314.2:320  
CgCctGcgagtctGGtatGATGTCTTGCAGGAACCTACAGTTCAAGAGACTGTAGGTTCTTCAAGGACAGTTTTTTGct  
cgagctggcgaattcc  
>CD\_NM\_012314.2:174  
CgCctGcgagtctGGtatGAACAGTCATCCTGCAATGTTGGTTCAAGAGACCAACATTGCAGGATGACTGTCTTTTTTGct  
cgagctggcgaattcc  
>CD\_NM\_014513.1:658  
CgCctGcgagtctGGtatGACTTGTTCCTGTACAGGAACTTCAAGAGAGTTTCTGTGACAGAAACAAGCTTTTTTGct  
cgagctggcgaattcc  
>CD\_NM\_014513.1:214  
CgCctGcgagtctGGtatGAACTTTGCGCCTCATTGGAGAGTTCAAGAGACTCTCCAATGAGGCGCAAAGTGTTTTTTGct  
cgagctggcgaattcc  
>CD\_NM\_014513.1:875

CgCctGcgagtctGGtatGCACAGGGAGGATTCTGATGAACTTCAAGAGAGTTCATCAGAATCCTCCCTGTTTTTTTGct  
cgagctggcgaattcc  
>CD\_NM\_014513.1:459  
CgCctGcgagtctGGtatGACTCCCGGAGCTCCTATGACATTTCAAGAGAATGTCATAGGAGCTCCGGGAGCTTTTTTGct  
cgagctggcgaattcc  
>CD\_NM\_014513.1:120  
CgCctGcgagtctGGtatGACCTGGTGAAATCAGAAGAGACTTCAAGAGAGTCTCTTCTGATTTACCAGGGTTTTTGct  
cgagctggcgaattcc  
>CD\_NM\_014513.1:608  
CgCctGcgagtctGGtatGAGCTCTTCCGTGACTCTCCATTTCAAGAGAATGGAGAGTCACGGAAAGAGCCTTTTTTGct  
cgagctggcgaattcc  
>CD\_NM\_014513.1:160  
CgCctGcgagtctGGtatGATCAGATGTCATGTTTGAGCACTTCAAGAGAGTGCTCAAACATGACATCTGACTTTTTTGct  
cgagctggcgaattcc  
>CD\_NM\_014513.1:172  
CgCctGcgagtctGGtatGATTTGAGCACTTCCCTTCTGCACTTCAAGAGAGTGCAGAAGGAAGTGCTCAAACTTTTTGct  
cgagctggcgaattcc  
>CD\_NM\_014513.1:903  
CgCctGcgagtctGGtatGCTCAGGAGGTGTCATACGCATATTTCAAGAGATATGCGTATGACACCTCCTGATTTTTTGct  
cgagctggcgaattcc  
>CD\_NM\_014513.1:150  
CgCctGcgagtctGGtatGCGCAATGTTGGTCAGATGTCATTTCAAGAGAATGACATCTGACCAACATTGCATTTTTTGct  
cgagctggcgaattcc  
>CD\_NM\_014513.1:441  
CgCctGcgagtctGGtatGACGTGACCTTGTCTGCAGCTCTTCAAGAGAGAGCTGCAGGACAAGGTCACGCTTTTTTGct  
cgagctggcgaattcc  
>CD\_NM\_014513.1:265  
CgCctGcgagtctGGtatGATCCATCGGTTCGCATGACACAATTTCAAGAGATTGTGTCATGCGACCGATGGAGTTTTTGct  
cgagctggcgaattcc  
>CD\_NM\_014513.1:620  
CgCctGcgagtctGGtatGAACTCTCCATACGAGTGGTCAATTTCAAGAGATTGACCACTCGTATGGAGAGTCTTTTTTGct  
cgagctggcgaattcc  
>CD\_NM\_014513.1:157  
CgCctGcgagtctGGtatGCTGGTCAGATGTCATGTTTGAGTTCAAGAGACTCAAACATGACATCTGACCAATTTTTTGct  
cgagctggcgaattcc  
>CD\_NM\_014513.1:302  
CgCctGcgagtctGGtatGCACAGATGCTACGGTCTGTTATTCAAGAGATAACAGAACCGTAGCATCTGTATTTTTTGct  
cgagctggcgaattcc  
>CD\_NM\_014513.1:133  
CgCctGcgagtctGGtatGCGAAGAGACAGTCATCCTGCAATTTCAAGAGATTGCAGGATGACTGTCTTCTTTTTTGct  
cgagctggcgaattcc  
>CD\_NM\_014513.1:13  
CgCctGcgagtctGGtatGATTGCTCATGGTCATCAGCATGTTCAAGAGACATGCTGATGACCATGAGCAACTTTTTTGct  
cgagctggcgaattcc  
>CD\_NM\_014513.1:352  
CgCctGcgagtctGGtatGAAGTGACCTCTGGACATCGTGTTCAAGAGACACGATGTCCAGAGGGTCACTGTTTTTGct  
cgagctggcgaattcc  
>CD\_NM\_014513.1:669  
CgCctGcgagtctGGtatGCCACAGGAACTCTTCAAATAGTTCAAGAGACTATTTGAAGAGTTTCTGTGATTTTTTGct  
cgagctggcgaattcc  
>CD\_NM\_014513.1:668  
CgCctGcgagtctGGtatGATCACAGGAACTCTTCAAATATTTCAAGAGATATTTGAAGAGTTTCTGTGACTTTTTTGct  
cgagctggcgaattcc  
>CD\_NM\_014513.1:656

CgCtGcgagtctGGtatGATGCTTGTCTGTCACAGGAATTCAAGAGATTCTGTGACAGAAACAAGCAGTTTTTGct  
cgagctggcgaattcc  
>CD\_NM\_014513.1:886  
CgCtGcgagtctGGtatGCTCTGATGAACAGGACCATCAGTTCAAGAGACTGATGGTCTGTTTCATCAGAATTTTTGct  
cgagctggcgaattcc  
>CD\_NM\_014513.1:765  
CgCtGcgagtctGGtatGCGGTCAAACCTCCCTTTCACCATTTCAAGAGAATGGTGAAAGGGAGTTTGACCATTTTTGct  
cgagctggcgaattcc  
>CD\_NM\_014513.1:374  
CgCtGcgagtctGGtatGCTCACAGGTCTATATGAGAACTTCAAGAGAGTTTCTCATATAGACCTGTGATTTTTTGct  
cgagctggcgaattcc  
>CD\_NM\_014513.1:804  
CgCtGcgagtctGGtatGCTCATCGCTGGTGCTCCAACAATTCAAGAGATTGTTGGAGCACCAGCGATGAATTTTTGct  
cgagctggcgaattcc  
>CD\_NM\_014513.1:775  
CgCtGcgagtctGGtatGACCTTTCACCATCCTCCTCTTCTTCAAGAGAGAAGAGGAGGATGGTGAAAGGGTTTTGct  
cgagctggcgaattcc  
>CD\_NM\_014513.1:246  
CgCtGcgagtctGGtatGAGGTCTCCAAGGGCAACTTCTTCAAGAGAGAGAAGTTGCCCTTGAGACCCTTTTTGct  
cgagctggcgaattcc  
>CD\_NM\_014513.1:614  
CgCtGcgagtctGGtatGCTCCGTGACTCTCCATACGAGTTTTCAAGAGAATCGTATGGAGAGTCACGGAATTTTTGct  
cgagctggcgaattcc  
>CD\_NM\_014513.1:288  
CgCtGcgagtctGGtatGCCCTGGCAGGGACCTACAGATGTTCAAGAGACATCTGTAGGTCCCTGCCAGGTTTTTGct  
cgagctggcgaattcc  
>CD\_NM\_014513.1:466  
CgCtGcgagtctGGtatGAAGCTCCTATGACATGTACCATTTCAAGAGAATGGTACATGTCATAGGAGCTTTTTGct  
cgagctggcgaattcc  
>CD\_NM\_014513.1:33  
CgCtGcgagtctGGtatGCGGCGTGTGTTGCGTCTTCTTTTTCAAGAGAAAGAACAACGCAACACACGCCATTTTTGct  
cgagctggcgaattcc  
>CD\_NM\_014513.1:212  
CgCtGcgagtctGGtatGAACACTTTGCGCCTCATTGGAGTTCAAGAGACTCCAATGAGGCGCAAAGTGTGTTTTGct  
cgagctggcgaattcc  
>CD\_NM\_014513.1:219  
CgCtGcgagtctGGtatGCGCGCCTCATTGGAGAGCACATTTCAAGAGAATGTGCTCTCCAATGAGGCGCATTTTTGct  
cgagctggcgaattcc  
>CD\_NM\_012314:47  
CgCtGcgagtctGGtatGCTGGCGTGTGTTGGGTCTTCTTTCAAGAGAAAGAACCAACACACGCCATTTTTGct  
cgagctggcgaattcc  
>CD\_NM\_013289.1:957  
CgCtGcgagtctGGtatGACTTGTCTGTCACAGGAACTTCAAGAGAGTTTCTGTGACAGAAACAAGCTTTTTGct  
cgagctggcgaattcc  
>CD\_NM\_013289.1:1177  
CgCtGcgagtctGGtatGCGCGAGGACTCTGATGAACAAGTTCAAGAGACTTGTTCATCAGAGTCCCTCGTTTTGct  
cgagctggcgaattcc  
>CD\_NM\_013289.1:432  
CgCtGcgagtctGGtatGCGGAGAGAGAGTCATCCTGCAATTCAAGAGATTGCAGGATGACTCTCTCTCTTTTTGct  
cgagctggcgaattcc  
>CD\_NM\_013289.1:459  
CgCtGcgagtctGGtatGATCAGATATCATGTTTGGACTTCAAGAGAGTGCTCAAACATGATATCTGACTTTTTGct  
cgagctggcgaattcc  
>CD\_NM\_013289.1:758

CgCctGcgagtctGGtatGACTCCCGGAGCTCCTATGACATTTCAAGAGAATGTCATAGGAGCTCCGGGAGCTTTTTTGct  
cgagctggcgaattcc  
>CD\_NM\_013289.1:362  
CgCctGcgagtctGGtatGCGGTGATCATGGTCACAGGAAATTC AAGAGATTCCTGTGACCATGATCACCATTTTTTGct  
cgagctggcgaattcc  
>CD\_NM\_013289.1:671  
CgCctGcgagtctGGtatGCGGTACAGGTCCATATGAGAATTC AAGAGATTCATATGGACCTGTGACCATTTTTTGct  
cgagctggcgaattcc  
>CD\_NM\_013289.1:177  
CgCctGcgagtctGGtatGCCGTACATAGGTTTAAACAATTTCTTCAAGAGAGAAATGTTAAACCTATGACGATTTTTTGct  
cgagctggcgaattcc  
>CD\_NM\_013289.1:449  
CgCctGcgagtctGGtatGCGCAATGTTGGTCAGATATCATTTC AAGAGAAATGATATCTGACCAACATTGCATTTTTTGct  
cgagctggcgaattcc  
>CD\_NM\_013289.1:168  
CgCctGcgagtctGGtatGATGTCACTATCGTCATAGGTTTTTCAAGAGAAAACCTATGACGATAGTGACACTTTTTTGct  
cgagctggcgaattcc  
>CD\_NM\_013289.1:673  
CgCctGcgagtctGGtatGATCACAGGTCCATATGAGAAACTTC AAGAGAGTTTCTCATATGGACCTGTGACTTTTTTGct  
cgagctggcgaattcc  
>CD\_NM\_013289.1:419  
CgCctGcgagtctGGtatGACCTGGTGAAATCAGGAGAGAGTTCAAGAGACTCTCTCCTGATTTTACCAGGGTTTTTGct  
cgagctggcgaattcc  
>CD\_NM\_013289.1:471  
CgCctGcgagtctGGtatGATTTGAGCACTTCTTTCTGCACTTCAAGAGAGTGCAGAAAGAAGTGCTCAAACTTTTTGct  
cgagctggcgaattcc  
>CD\_NM\_013289.1:190  
CgCctGcgagtctGGtatGCACAATTTTCATGCTATACAAAGTTCAAGAGACTTTGTATAGCATGAAATGTTTTTTTTGct  
cgagctggcgaattcc  
>CD\_NM\_013289.1:229  
CgCctGcgagtctGGtatGACCATCTTCCATGGCAGATTATTTCAAGAGAATAATCTGCCATGGAAGATGGGTTTTTGct  
cgagctggcgaattcc  
>CD\_NM\_013289.1:740  
CgCctGcgagtctGGtatGACGTGACCTTGTCTCCTGCAGCTCTTCAAGAGAGAGCTGCAGGACAAGGTCACGTTTTTGct  
cgagctggcgaattcc  
>CD\_NM\_013289.1:169  
CgCctGcgagtctGGtatGCGTCACTATCGTCATAGGTTTATTCAAGAGATAAACCTATGACGATAGTGACATTTTTTGct  
cgagctggcgaattcc  
>CD\_NM\_013289.1:239  
CgCctGcgagtctGGtatGCTGGCAGATTATTCCAGGAGAGTTCAAGAGACTCTCCTGGAATAATCTGCCATTTTTTGct  
cgagctggcgaattcc  
>CD\_NM\_013289.1:446  
CgCctGcgagtctGGtatGCCCTGCAATGTTGGTCAGATATTTCAAGAGAAATATCTGACCAACATTGCAGGATTTTTTGct  
cgagctggcgaattcc  
>CD\_NM\_013289.1:1306  
CgCctGcgagtctGGtatGCACACGGAACCTCCAAATGCTATTCAAGAGATAGCATTGGAAGTTCCGTGTATTTTTTGct  
cgagctggcgaattcc  
>CD\_NM\_013289.1:475  
CgCctGcgagtctGGtatGAAGCACTTCTTTCTGCACAAAGTTCAAGAGACTTTGTGCAGAAAGAAGTGCTTTTTTGct  
cgagctggcgaattcc  
>CD\_NM\_013289.1:601  
CgCctGcgagtctGGtatGCACAGATGCTACGGTTCTGTTATTCAAGAGATAACAGAACCGTAGCATCTGTATTTTTTGct  
cgagctggcgaattcc  
>CD\_NM\_013289.1:1059

CgCctGcgagtctGGtatGATCAGTGGTCATCATCCTCTTCTTCAAGAGAGAAGAGGATGATGACCACTGAGTTTTTGct  
cgagctggcgaattcc  
>CD\_NM\_013289.1:363  
CgCctGcgagtctGGtatGAGTGATCATGGTCACAGGAACTTCAAGAGAGTTTCTGTGACCATGATCACTTTTTGct  
cgagctggcgaattcc  
>CD\_NM\_013289.1:1089  
CgCctGcgagtctGGtatGACTCTTCTTCTCCTTCATCTCTTCAAGAGAGAGATGAAGGAGAAAGAAGAGGTTTTTGct  
cgagctggcgaattcc  
>CD\_NM\_013289.1:1103  
CgCctGcgagtctGGtatGCTCATCTCTGGTGCTCCAACAATTCAAGAGATTGTTGGAGCACCAGAGATGAATTTTTGct  
cgagctggcgaattcc  
>CD\_NM\_013289.1:955  
CgCctGcgagtctGGtatGATGCTTGTCTGTTCACAGGAATTCAAGAGATTCCTGTGACAGAAACAAGCAGTTTTTGct  
cgagctggcgaattcc  
>CD\_NM\_013289.1:821  
CgCctGcgagtctGGtatGCCCCTGCAGTGCAGCAAGGTCAATTCAAGAGATTGACCTTGCCTACTGCAGGGATTTTTGct  
cgagctggcgaattcc  
>CD\_NM\_013289.1:1174  
CgCctGcgagtctGGtatGCACAGCGAGGACTCTGATGAACTTCAAGAGAGTTCATCAGAGTCTCGCTGTTTTTTGct  
cgagctggcgaattcc  
>CD\_NM\_013289.1:251  
CgCctGcgagtctGGtatGCCCAGGAGAGCTTCAACATGAGTTCAAGAGACTCATGTTGAAGCTCTCCTGGATTTTTGct  
cgagctggcgaattcc  
>CD\_NM\_013289.1:967  
CgCctGcgagtctGGtatGATCACAGGAAACCCTTCAAGTATTCAAGAGATACTTGAAGGGTTTCTGTGACTTTTTTGct  
cgagctggcgaattcc  
>CD\_NM\_013289.1:827  
CgCctGcgagtctGGtatGAAGTGCAGCAAGGTCAACAGAATTCAAGAGAGTTCTGTTGACCTTGCCTACTGTTTTTGct  
cgagctggcgaattcc  
>CD\_NM\_006737.1:934  
CgCctGcgagtctGGtatGACTTGTCTGTTCACAGGAACTTCAAGAGAGTTTCTGTGACAGAAACAAGTTTTTGct  
cgagctggcgaattcc  
>CD\_NM\_006737.1:1154  
CgCctGcgagtctGGtatGCGGCAGGACTCTGATGAACAAGTTCAAGAGACTTGTTCATCAGAGTCTGCCTTTTTTGct  
cgagctggcgaattcc  
>CD\_NM\_006737.1:163  
CgCctGcgagtctGGtatGATTTAAACAATTTTCATGCTGTACTTCAAGAGAGTACAGCATGAAATTGTTAAACTTTTTGct  
cgagctggcgaattcc  
>CD\_NM\_006737.1:409  
CgCctGcgagtctGGtatGCGGAGAGACAGTCATCCTGCAATTCAAGAGATTGCAGGATGACTGTCTCTCCTTTTTTGct  
cgagctggcgaattcc  
>CD\_NM\_006737.1:735  
CgCctGcgagtctGGtatGACTCCTGGAGCTCCTATGACATTTCAAGAGAATGTCATAGGAGCTCCAGGAGCTTTTTGct  
cgagctggcgaattcc  
>CD\_NM\_006737.1:4  
CgCctGcgagtctGGtatGATCGCTCACTGTCGTCAGCATGTTCAAGAGACATGCTGACGACAGTGAGCGACTTTTTGct  
cgagctggcgaattcc  
>CD\_NM\_006737.1:578  
CgCctGcgagtctGGtatGCACAGATGTTATGGTCTGTCTTCAAGAGAGAACAGAACATAACATCTGTATTTTTGct  
cgagctggcgaattcc  
>CD\_NM\_006737.1:216  
CgCctGcgagtctGGtatGCCGGCAGAAATATCCAGGAGAGTTCAAGAGACTCTCCTGGAATATTCTGCCGTTTTTGct  
cgagctggcgaattcc  
>CD\_NM\_006737.1:900



CgCctGcgagtctGGtatGCGCCCTGCGTGTGGTCAAACCTTTCAAGAGAGAGTTTGACCACACGCAGGGCATTTTTGct  
cgagctggcgaattcc  
>CD\_NM\_006737.1:339  
CgCctGcgagtctGGtatGCGGTGATCATGGTCACAGGAAATTC AAGAGATTCCTGTGACCATGATCACCATTTTTGct  
cgagctggcgaattcc  
>CD\_NM\_006737.1:436  
CgCctGcgagtctGGtatGATCAGATGTCATGTTTGAGCACTTCAAGAGAGTGCTCAAACATGACATCTGACTTTTTGct  
cgagctggcgaattcc  
>CD\_NM\_006737.1:1038  
CgCctGcgagtctGGtatGAAGTGGTCATCTTCCTCTTCATTTCAAGAGAATGAAGAGGAAGATGACCACTGTTTTGct  
cgagctggcgaattcc  
>CD\_NM\_006737.1:396  
CgCctGcgagtctGGtatGACCTGCTGAAATCAGGAGAGACTTCAAGAGAGTCTCTCCTGATTT CAGCAGGGTTTTGct  
cgagctggcgaattcc  
>CD\_NM\_006737.1:426  
CgCctGcgagtctGGtatGCGCAATGTTGGTCAGATGTCATTTCAAGAGAATGACATCTGACCAACATTCATTTTTGct  
cgagctggcgaattcc  
>CD\_NM\_006737.1:902  
CgCctGcgagtctGGtatGACCTGCGTGTGGTCAAACCTCAATTCAAGAGATTGAGTTTGACCACACGCAGGGTTTTGct  
cgagctggcgaattcc  
>CD\_NM\_006737.1:717  
CgCctGcgagtctGGtatGCCGTGACCTTGTCCTGTAGCTCTTCAAGAGAGAGCTACAGGACAAGGTCACGTTTTGct  
cgagctggcgaattcc  
>CD\_NM\_006737.1:448  
CgCctGcgagtctGGtatGATTTGAGCACTTCTTTCTGCACTTCAAGAGAGTGCAGAAAGAAGTGCTCAAACTTTTGct  
cgagctggcgaattcc  
>CD\_NM\_006737.1:1063  
CgCctGcgagtctGGtatGACTCCTCTTCTTTCTCCTTTATTTCAAGAGAATAAAGGAGAAAGAAGAGGAGTTTTGct  
cgagctggcgaattcc  
>CD\_NM\_006737.1:1283  
CgCctGcgagtctGGtatGCACACGGAACCTCCAAATGCTGTTCAAGAGACAGCATTGGAAGTTCGTGATTTTTGct  
cgagctggcgaattcc  
>CD\_NM\_006737.1:433  
CgCctGcgagtctGGtatGCTGGTCAGATGTCATGTTTGAGTTCAAGAGACTCAAACATGACATCTGACCAATTTTTGct  
cgagctggcgaattcc  
>CD\_NM\_006737.1:903  
CgCctGcgagtctGGtatGACTGCGTGTGGTCAAACCTCAAGTTCAAGAGACTTGAGTTTGACCACACGCAGGTTTTGct  
cgagctggcgaattcc  
>CD\_NM\_006737.1:726  
CgCctGcgagtctGGtatGCGTCTGTAGCTCCTGGAGCTCTTCAAGAGAGAGCTCCAGGAGCTACAGGACATTTTTGct  
cgagctggcgaattcc  
>CD\_NM\_006737.1:340  
CgCctGcgagtctGGtatGAGTGATCATGGTCACAGGAACTTCAAGAGAGTTTCCTGTGACCATGATCACCTTTTTGct  
cgagctggcgaattcc  
>CD\_NM\_006737.1:932  
CgCctGcgagtctGGtatGATGCTTGTCTGTTCACAGGAATTC AAGAGATTCCTGTGACAGAAACAAGCAGTTTTGct  
cgagctggcgaattcc  
>CD\_NM\_006737.1:196  
CgCctGcgagtctGGtatGCAGCCACGTTCCCATCTTCCACTTCAAGAGAGTGAAGATGGGAACGTGGCTTTTTGct  
cgagctggcgaattcc  
>CD\_NM\_006737.1:1328  
CgCctGcgagtctGGtatGCGCCCACGAGCACCACAGTCAGTTCAAGAGACTGACTGTGGTGCTCGTGGGCATTTTTGct  
cgagctggcgaattcc  
>CD\_NM\_006737.1:647

CgCtGcgagtctGGtatGCTCACAGGTCTATATGAGAACTTCAAGAGAGTTTCTCATATAGACCTGTGATTTTTTGct  
cgagctggcgaattcc  
>CD\_NM\_006737.1:944  
CgCtGcgagtctGGtatGATCACAGGAAACCCTTCAAGTATTCAAGAGATACTTGAAGGGTTTCTGTGACTTTTTTGct  
cgagctggcgaattcc  
>CD\_NM\_006737.1:237  
CgCtGcgagtctGGtatGACTTCATCATGGGCCCTGTGACTTCAAGAGAGTACAGGGCCCATGATGAAGCTTTTTTGct  
cgagctggcgaattcc  
>CD\_NM\_006737.1:65  
CgCtGcgagtctGGtatGATCATGGGTGGTCAGGACAACTTCAAGAGAGTTTGTCTGACCACCCATGAGTTTTTGct  
cgagctggcgaattcc  
>CD\_NM\_006737.1:858  
CgCtGcgagtctGGtatGACCACGGAGGGACCTACAGATGTTCAAGAGACATCTGTAGGTCCCTCCGTGGGTTTTTGct  
cgagctggcgaattcc  
>CD\_NM\_006737.1:804  
CgCtGcgagtctGGtatGAAGTGCCCAAGGTCAACAGAACTTCAAGAGAGTTCTGTTGACCTTGGGCACTTTTTTGct  
cgagctggcgaattcc  
>CD\_NM\_006737.1:469  
CgCtGcgagtctGGtatGAAGAGATGGGATCTCTGAGGACTTCAAGAGAGTCTCAGAGATCCCATCTCTGTTTTTGct  
cgagctggcgaattcc  
>CD\_NM\_012314:40  
CgCtGcgagtctGGtatGCTGGCGTGTGTTGGGTTCTTCTTTCAAGAGAAGAAGAACCAACACACGCCATTTTTTGct  
cgagctggcgaattcc  
>CD\_NM\_153440.2:950  
CgCtGcgagtctGGtatGACCCGTTTCTGTGCACAGGTAACCTTCAAGAGAGTTACCTGTGACAGAAACGGGCTTTTTTGct  
cgagctggcgaattcc  
>CD\_NM\_153440.2:1119  
CgCtGcgagtctGGtatGCGGGAGGACTCTGATGAACAAGTTCAAGAGACTTGTTCATCAGAGTCTCCCTTTTTTGct  
cgagctggcgaattcc  
>CD\_NM\_153440.2:119  
CgCtGcgagtctGGtatGACCCGGCACTGTGGTGTCTGAATTTCAAGAGATTCAGACACCACAGTGCCGGGCTTTTTTGct  
cgagctggcgaattcc  
>CD\_NM\_153440.2:425  
CgCtGcgagtctGGtatGAGGAGAGACGGTCATCCTGCAATTTCAAGAGATTGCAGGATGACCGTCTCTCCCTTTTTTGct  
cgagctggcgaattcc  
>CD\_NM\_153440.2:608  
CgCtGcgagtctGGtatGCTCTGTCACTCACTTACCCTATTTCAAGAGAATAGGGTAAGTGAGTGACAGAATTTTTTGct  
cgagctggcgaattcc  
>CD\_NM\_153440.2:140  
CgCtGcgagtctGGtatGCGGACAACATGTGACTCTTCAAGTTCAGTTCAAGAGACTGAAGAGTCACATGTTGTCCTTTTTTGct  
cgagctggcgaattcc  
>CD\_NM\_153440.2:215  
CgCtGcgagtctGGtatGACCTGTCCCTGAGCTCTACAACCTTCAAGAGAGTTGTAGAGCTCAGGGACAGGCTTTTTTGct  
cgagctggcgaattcc  
>CD\_NM\_153440.2:344  
CgCtGcgagtctGGtatGAAGCAACCCTGTGGTGATCATGTTCAAGAGACATGATCACCACAGGGTTGCTGTTTTTGct  
cgagctggcgaattcc  
>CD\_NM\_153440.2:442  
CgCtGcgagtctGGtatGCGCAATGTTGGTCAGATGTCAGTTCAAGAGACTGACATCTGACCAACATTGCATTTTTTGct  
cgagctggcgaattcc  
>CD\_NM\_153440.2:470  
CgCtGcgagtctGGtatGACGCTTCCTTCTGCACAGAGAGTTCAAGAGACTCTCTGTGCAGAAGGAAGCGCTTTTTTGct  
cgagctggcgaattcc  
>CD\_NM\_153440.2:126

CgCctGcgagtctGGtatGCCTGTGGTGTCTGAAGGACAACTTCAAGAGAGTTGTCCTTCAGACACCACAGTTTTTTGct  
cgagctggcgaattcc  
>CD\_NM\_153440.2:1232  
CgCctGcgagtctGGtatGCACAGATACCAGCGTGTAACTTCAAGAGAGTGTACACGCTGGTATCTGTTTTTTGct  
cgagctggcgaattcc  
>CD\_NM\_153440.2:20  
CgCctGcgagtctGGtatGATCGCTCATGGTCGTCAGCATGTTCAAGAGACATGCTGACGACCATGAGCGACTTTTTGct  
cgagctggcgaattcc  
>CD\_NM\_153440.2:733  
CgCctGcgagtctGGtatGCTGTGACCTTGTCTGCAGCTCTTCAAGAGAGAGCTGCAGGACAAGGTCACATTTTTGct  
cgagctggcgaattcc  
>CD\_NM\_153440.2:752  
CgCctGcgagtctGGtatGATCCCGAGCTTGTTTGACATTTTCAAGAGAAATGTCAAACAAGCTCCGGGAGTTTTGct  
cgagctggcgaattcc  
>CD\_NM\_153440.2:167  
CgCctGcgagtctGGtatGATCTCGTCTTGGGTTTAACGAATTCAAGAGATTCGTTAAACCAAGACGAGAGTTTTGct  
cgagctggcgaattcc  
>CD\_NM\_153440.2:1073  
CgCctGcgagtctGGtatGCGCTGTTGTAATGGACCAAGAGTTCAAGAGACTCTTGGTCCATTACAACAGCATTTTTGct  
cgagctggcgaattcc  
>CD\_NM\_153440.2:1150  
CgCctGcgagtctGGtatGCGGTGACATACGCACAGTTGAATTCAAGAGATTCAACTGTGCGTATGTCACCTTTTTGct  
cgagctggcgaattcc  
>CD\_NM\_153440.2:815  
CgCctGcgagtctGGtatGAACTGCGGTGCTGAGGGTCAATTTCAAGAGAATTGACCCTCAGCACCCGAGTTTTTGct  
cgagctggcgaattcc  
>CD\_NM\_153440.2:464  
CgCctGcgagtctGGtatGATTTGAGCGCTTCCTTCTGCACTTCAAGAGAGTGCAGAAGGAAGCGCTCAAACTTTTGct  
cgagctggcgaattcc  
>CD\_NM\_153440.2:644  
CgCctGcgagtctGGtatGAAGTGACCCTCTGGACATCGTGTTCAGAGACACGATGTCCAGAGGGTCACTGTTTTGct  
cgagctggcgaattcc  
>CD\_NM\_153440.2:602  
CgCctGcgagtctGGtatGATTTGGTTCTGTCACTCACTTATTCAAGAGATAAGTGAGTGACAGAACCAAAGTTTTGct  
cgagctggcgaattcc  
>CD\_NM\_153440.2:754  
CgCctGcgagtctGGtatGACCGGAGCTTGTTTGACATTTATTCAAGAGATAAATGTCAAACAAGCTCCGGGTTTTGct  
cgagctggcgaattcc  
>CD\_NM\_153440.2:1019  
CgCctGcgagtctGGtatGATTTGCTATCCTCCTCTTTTTTCAAGAGAAAAGAAGAGGAGGATAGCAAAGTTTTGct  
cgagctggcgaattcc  
>CD\_NM\_153440.2:1152  
CgCctGcgagtctGGtatGATGACATACGCACAGTTGAATCTTCAAGAGAGATTCAACTGTGCGTATGTCACTTTTGct  
cgagctggcgaattcc  
>CD\_NM\_153440.2:412  
CgCctGcgagtctGGtatGACCTGGTGAATCGGGAGAGACTTCAAGAGAGTCTCTCCGATTTACCAGGGTTTTGct  
cgagctggcgaattcc  
>CD\_NM\_153440.2:820  
CgCctGcgagtctGGtatGAGGTGCTGAGGGTCAATGGAACCTTCAAGAGAGTTCATTGACCCTCAGCACCGTTTTGct  
cgagctggcgaattcc  
>CD\_NM\_153440.2:751  
CgCctGcgagtctGGtatGACTCCCGAGCTTGTTTGACATTTCAAGAGAATGTCAAACAAGCTCCGGGAGTTTTGct  
cgagctggcgaattcc  
>CD\_NM\_153440.2:187

CgCctGcgagtctGGtatGCATTcAGTCTGTCCAAAGAAGATTCAAGAGATCTTCTTTGGACAGACTGAATTTTTTTGct  
cgagctggcgaattcc  
>CD\_NM\_153440.2:1116  
CgCctGcgagtctGGtatGCACAGGGAGGACTCTGATGAACCTCAAGAGAGTTCATCAGAGTCCCTCCCTGTTTTTTGct  
cgagctggcgaattcc  
>CD\_NM\_153440.2:217  
CgCctGcgagtctGGtatGATGTCCCTGAGCTCTACAACAGTTCAAGAGACTGTTGTAGAGCTCAGGGACAGTTTTTTGct  
cgagctggcgaattcc  
>CD\_NM\_153440.2:340  
CgCctGcgagtctGGtatGAACCCAGCAACCTGTGGTGATTTCAAGAGAATCACCACAGGGTTGCTGGGTGTTTTTTGct  
cgagctggcgaattcc  
>CD\_NM\_002259:361  
CgCctGcgagtctGGtatGAAGCTCCAGAGAAGCTCATTGTTTTCAAGAGACAATGAGCTTCTCTGGAGCTGTTTTTTGct  
cgagctggcgaattcc  
>CD\_NM\_002259:387  
CgCctGcgagtctGGtatGCTCCTGGGAATTATCTGTCTTATTCAAGAGATAAGACAGATAAATCCCAGGATTTTTTTGct  
cgagctggcgaattcc  
>CD\_NM\_002259:390  
CgCctGcgagtctGGtatGATGGGAATTATCTGTCTTATCTTTCAAGAGAAGATAAGACAGATAAATCCCAGTTTTTTGct  
cgagctggcgaattcc  
>CD\_NM\_002259:738  
CgCctGcgagtctGGtatGCTGGCTTTCAAACATGAGATAAATCAAGAGATTATCTCATGTTTGAAAGCCAATTTTTTTGct  
cgagctggcgaattcc  
>CD\_NM\_002261:520  
CgCctGcgagtctGGtatGATCCTGAGGAGTGGATTACATATTCAAGAGATATGTAATCCACTCCTCAGGACTTTTTTTGct  
cgagctggcgaattcc  
>CD\_NM\_002261:738  
CgCctGcgagtctGGtatGCTGGCTTTCAAACATGAGATAAATCAAGAGATTATCTCATGTTTGAAAGCCAATTTTTTTGct  
cgagctggcgaattcc  
>CD\_NM\_002259:819  
CgCctGcgagtctGGtatGACCCAGTGTGGATCTTCAATAAATCAAGAGATTATTGAAGATCCACACTGGGCTTTTTTTGct  
cgagctggcgaattcc  
>CD\_NM\_002259:391  
CgCctGcgagtctGGtatGCGGAATTATCTGTCTTATCTTTTCAAGAGAAAGATAAGACAGATAAATCCCATTTTTTTGct  
cgagctggcgaattcc  
>CD\_NM\_002259.3:821  
CgCctGcgagtctGGtatGAAGTGTGGATCTTCAATAATATTTCAAGAGAATATTATTGAAGATCCACACTGTTTTTTGct  
cgagctggcgaattcc  
>CD\_NM\_002259.3:819  
CgCctGcgagtctGGtatGACCAGTGTGGATCTTCAATAATTTCAAGAGAATATTATTGAAGATCCACACTGGGTTTTTTGct  
cgagctggcgaattcc  
>CD\_NM\_002259.3:763  
CgCctGcgagtctGGtatGATCAGATAATGCTGAACTTAACTTCAAGAGAGTTAAGTTCAGCATTATCTGAGTTTTTTGct  
cgagctggcgaattcc  
>CD\_NM\_002259.3:682  
CgCctGcgagtctGGtatGCTGGATTGGTGTGTTTCGTAACCTTCAAGAGAGTTACGAAACACACCAATCCATTTTTTTGct  
cgagctggcgaattcc  
>CD\_NM\_002259.3:435  
CgCctGcgagtctGGtatGCTGTTATCCCTCTACATTAATTTCAAGAGAATTAATGTAGAGGGAATAACAATTTTTTTGct  
cgagctggcgaattcc  
>CD\_NM\_002259.3:520  
CgCctGcgagtctGGtatGCCCTGAGGAGTGGATTACATATTTCAAGAGAATATGTAATCCACTCCTCAGGATTTTTTTGct  
cgagctggcgaattcc  
>CD\_NM\_002259.3:441

CgCctGcgagtctGGtatGCTCCCTCTACATTAATACAGAGTTCAAGAGACTCTGTATTAATGTAGAGGGAATTTTTGct  
cgagctggcgaattcc  
>CD\_NM\_002259.3:761  
CgCctGcgagtctGGtatGAACTCAGATAATGCTGAACTTATTCAAGAGATAAGTTCAGCATTATCTGAGTCTTTTTGct  
cgagctggcgaattcc  
>CD\_NM\_002259.3:718  
CgCctGcgagtctGGtatGCTGGGTGACAATGAATGGTTTGTTC AAGAGACAAACCATTTCATTGTCACCCATTTTTGct  
cgagctggcgaattcc  
>CD\_NM\_002259.3:733  
CgCctGcgagtctGGtatGCGGTTTGGCTTTC A A A C A T G A G T T C A A G A G A C T C A T G T T T G A A A G C C A A A C C A T T T T T G c t  
cgagctggcgaattcc  
>CD\_NM\_002259.3:677  
CgCctGcgagtctGGtatGCCCTCATGGATTGGTGTGTTTCTTCAAGAGAGAAACACACCAATCCATGAGGATTTTTGct  
cgagctggcgaattcc  
>CD\_NM\_002259.3:619  
CgCctGcgagtctGGtatGAAGTCTGCTTCTATAGATAATTTCAAGAGAATTATCTATAGAAAGCAGACTGTTTTGct  
cgagctggcgaattcc  
>CD\_NM\_002259.3:737  
CgCctGcgagtctGGtatGCTGGCTTTC A A A C A T G A G A T A A T T C A A G A G A T T A T C T C A T G T T T G A A A G C C A A T T T T T G c t  
cgagctggcgaattcc  
>CD\_NM\_002259.3:617  
CgCctGcgagtctGGtatGCCAGTCTGCTTCTATAGATATTTCAAGAGATATCTATAGAAAGCAGACTGGATTTTTGct  
cgagctggcgaattcc  
>CD\_NM\_002259.3:525  
CgCctGcgagtctGGtatGCGGAGTGGATTACATATTTCCAATTTCAAGAGATTGGAATATGTAATCCACTCCTTTTTGct  
cgagctggcgaattcc  
>CD\_NM\_002259.3:412  
CgCctGcgagtctGGtatGCATGGCCTCTGTGGTAACGATATTTCAAGAGATATCGTTACCACAGAGGCCATTTTTGct  
cgagctggcgaattcc  
>CD\_NM\_002259.3:387  
CgCctGcgagtctGGtatGCCCTGGGAATTATCTGTCTTATTTCAAGAGAATAAGACAGATAATTTCCAGGATTTTTGct  
cgagctggcgaattcc  
>CD\_NM\_002259.3:551  
CgCctGcgagtctGGtatGCGTTACTACATTGGTAAGGAAATTTCAAGAGATTTCCCTTACCAATGTAGTAACATTTTTGct  
cgagctggcgaattcc  
>CD\_NM\_002259.3:274  
CgCctGcgagtctGGtatGCATAACCTATGCGGAATTA A A C T T C A A G A G A G T T T A A T T C C G C A T A G G T T A T T T T T T G c t  
cgagctggcgaattcc  
>CD\_NM\_002259.3:728  
CgCctGcgagtctGGtatGCTGAATGGTTTGGCTTTC A A A C T T C A A G A G A G T T T G A A A G C C A A A C C A T T C A T T T T T G c t  
cgagctggcgaattcc  
>CD\_NM\_002259.3:462  
CgCctGcgagtctGGtatGAGCACAACAATTCCTCCCTGAATTTCAAGAGATTCAGGGAAGAATTGTTGTGCCTTTTTGct  
cgagctggcgaattcc  
>CD\_NM\_002259.3:547  
CgCctGcgagtctGGtatGAAGTTGTTACTACATTGGTAAGTTCAAGAGACTTACCAATGTAGTAACA A C T G T T T T T G c t  
cgagctggcgaattcc  
>CD\_NM\_002259.3:390  
CgCctGcgagtctGGtatGCGGGAATTATCTGTCTTATCTTTTCAAGAGAAAGATAAGACAGATAATTTCCATTTTTGct  
cgagctggcgaattcc  
>CD\_NM\_002259.3:724  
CgCctGcgagtctGGtatGAACAATGAATGGTTTGGCTTTC A A A G A G A G A A A G C C A A A C C A T T C A T T G T C T T T T T G c t  
cgagctggcgaattcc  
>CD\_NM\_002259.3:597

CgCctGcgagtctGGtatGCGGCCTGTACTTCGAAGAACTCTTCAAGAGAGAGTTCTTCGAAGTACAGGCCATTTTTGct  
cgagctggcgaattcc  
>CD\_NM\_002261:65  
CgCctGcgagtctGGtatGAAGCAAAGGAAACCTAAAGGCATTCAAGAGATGCCTTTAGGTTTCCTTTGCTGTTTTGct  
cgagctggcgaattcc  
>CD\_NM\_002261:251  
CgCctGcgagtctGGtatGATCCTGATGGCCACTGTGTTAATTCAAGAGATTAACACAGTGGCCATCAGGACTTTTTGct  
cgagctggcgaattcc  
>CD\_NM\_002261:357  
CgCctGcgagtctGGtatGATCCTGAGGAGTGGATTACATATTCAAGAGATATGTAATCCACTCCTCAGGACTTTTTGct  
cgagctggcgaattcc  
>CD\_NM\_002260.3:658  
CgCctGcgagtctGGtatGAAGTGTGGATCTTCAATGATATTTCAAGAGAATATCATTGAAGATCCACACTGTTTTGct  
cgagctggcgaattcc  
>CD\_NM\_002260.3:600  
CgCctGcgagtctGGtatGATCAGATAATGCTGAACTTAACTTCAAGAGAGTTAAGTTCAGCATTATCTGAGTTTTGct  
cgagctggcgaattcc  
>CD\_NM\_002260.3:519  
CgCctGcgagtctGGtatGCTGGATTGGTGTGTTTCGTAACCTCAAGAGAGTTACGAAACACACCAATCCATTTTTGct  
cgagctggcgaattcc  
>CD\_NM\_002260.3:570  
CgCctGcgagtctGGtatGCGGTTTGGCTTTCAAACATAAGTTCAAGAGACTTATGTTTGAAAGCCAAACCATTTTTGct  
cgagctggcgaattcc  
>CD\_NM\_002260.3:357  
CgCctGcgagtctGGtatGCCCTGAGGAGTGGATTACATATTTCAAGAGAATATGTAATCCACTCCTCAGGATTTTTGct  
cgagctggcgaattcc  
>CD\_NM\_002260.3:656  
CgCctGcgagtctGGtatGACCAGTGTGGATCTTCAATGATTTCAAGAGAATCATTGAAGATCCACACTGGGTTTTGct  
cgagctggcgaattcc  
>CD\_NM\_002260.3:219  
CgCctGcgagtctGGtatGAACTGCCGAGGTCCTAGGAATCTTCAAGAGAGATTCCTAGGACCTCGGCAGTTTTTGct  
cgagctggcgaattcc  
>CD\_NM\_002260.3:207  
CgCctGcgagtctGGtatGCCAGAGAAGCTCACTGCCGAGTTCAAGAGACTCGGCAGTGAGCTTCTCTGGATTTTTGct  
cgagctggcgaattcc  
>CD\_NM\_002260.3:574  
CgCctGcgagtctGGtatGCTGGCTTTCAAACATAAGATAAATTCAAGAGATTATCTTATGTTTGAAAGCCAATTTTTGct  
cgagctggcgaattcc  
>CD\_NM\_002260.3:663  
CgCctGcgagtctGGtatGCGGATCTTCAATGATATATCATTTCAGAGAATGATATATCATTGAAGATCCATTTTTGct  
cgagctggcgaattcc  
>CD\_NM\_002260.3:598  
CgCctGcgagtctGGtatGAACTCAGATAATGCTGAACTTATTCAAGAGATAAGTTCAGCATTATCTGAGTCTTTTTGct  
cgagctggcgaattcc  
>CD\_NM\_002260.3:388  
CgCctGcgagtctGGtatGCGTTATTACATTGGTAAGGAAATTCAAGAGATTTCTTACCAATGTAATAACATTTTTGct  
cgagctggcgaattcc  
>CD\_NM\_002260.3:384  
CgCctGcgagtctGGtatGAAGTTGTTATTACATTGGTAAGTTCAAGAGACTTACCAATGTAATAACAACACTTTTTGct  
cgagctggcgaattcc  
>CD\_NM\_002260.3:514  
CgCctGcgagtctGGtatGCCCTCATGGATTGGTGTGTTTCTTCAAGAGAGAAACACACCAATCCATGAGGATTTTTGct  
cgagctggcgaattcc  
>CD\_NM\_002260.3:456

CgCctGcgagtctGGtatGAAGTCTGCTTTCTATAGATAATTTCAAGAGAATTATCTATAGAAAGCAGACTGTTTTTGct  
cgagctggcgaattcc  
>CD\_NM\_002260.3:60  
CgCctGcgagtctGGtatGACGGCAGCAAAGGAAACCTAAATTTCAAGAGATTTAGGTTTCCTTTGCTGCCGTTTTTTGct  
cgagctggcgaattcc  
>CD\_NM\_002260.3:156  
CgCctGcgagtctGGtatGAAATCATCAAGGGATTGATAAATTTCAAGAGATTTATCAATCCCTTGATGATTCTTTTTGct  
cgagctggcgaattcc  
>CD\_NM\_002260.3:454  
CgCctGcgagtctGGtatGCCAGTCTGCTTTCTATAGATATTTCAAGAGATATCTATAGAAAGCAGACTGGATTTTTGct  
cgagctggcgaattcc  
>CD\_NM\_002260.3:684  
CgCctGcgagtctGGtatGCTGTAAGCATAAGCTTTAGAAGTTCAAGAGACTTCTAAAGCTTATGCTTACAATTTTTGct  
cgagctggcgaattcc  
>CD\_NM\_002260.3:362  
CgCctGcgagtctGGtatGCGGAGTGGATTACATATTTCCAATTTCAAGAGATTGGAATATGTAATCCACTCCTTTTTTGct  
cgagctggcgaattcc  
>CD\_NM\_002260.3:20  
CgCctGcgagtctGGtatGAAGGAACCTTCTCAGAAGTGAGTTCAAGAGACTCATTCTGAGAAGGTTCTTTTTTGct  
cgagctggcgaattcc  
>CD\_NM\_002260.3:97  
CgCctGcgagtctGGtatGCTTTCAGGAACCGAACAGGAAATTTCAAGAGATTTCTGTTTCGGTTCTTGAAATTTTTTGct  
cgagctggcgaattcc  
>CD\_NM\_002260.3:50  
CgCctGcgagtctGGtatGCGGACCCAAAGCGGCAGCAAAGTTCAAGAGACTTTGCTGCCGCTTTGGGTCCTTTTTTGct  
cgagctggcgaattcc  
>CD\_NM\_002260.3:150  
CgCctGcgagtctGGtatGCTCCCTGAATCATCAAGGGATTTTCAAGAGAAATCCCTTGATGATTCAGGGAATTTTTGct  
cgagctggcgaattcc  
>CD\_NM\_002260.3:285  
CgCctGcgagtctGGtatGCATTCCTTTCTGGAGCAGAACTTTCAAGAGAGTTCTGCTCCAGGAAAGGAATTTTTTGct  
cgagctggcgaattcc  
>CD\_NM\_002260.3:434  
CgCctGcgagtctGGtatGCGGCCTGTACTTTCGAAGAACTTTCAAGAGAGAGTTCTTCGAAGTACAGGCCATTTTTGct  
cgagctggcgaattcc  
>CD\_NM\_002260.3:251  
CgCctGcgagtctGGtatGCCCTGATGGCCACTGTGTTAAATTTCAAGAGATTTAACACAGTGGCCATCAGGATTTTTGct  
cgagctggcgaattcc  
>CD\_NM\_002260.3:377  
CgCctGcgagtctGGtatGCTTCCAACAGTTGTTATTACATTTCAAGAGAATGTAATAACAACACTGTTGGAATTTTTTGct  
cgagctggcgaattcc  
>CD\_NM\_002260.3:54  
CgCctGcgagtctGGtatGACCAAAGCGGCAGCAAAGGAAATTTCAAGAGATTTCTTTGCTGCCGCTTTGGGTTTTTGct  
cgagctggcgaattcc  
>CD\_NM\_002260.3:569  
CgCctGcgagtctGGtatGCTGGTTTTGGCTTTCAAACATAATTTCAAGAGATTATGTTTTGAAAGCCAAACCATTTTTTGct  
cgagctggcgaattcc  
>CD\_NM\_007053:330  
CgCctGcgagtctGGtatGCCGCGACTAACTTAATCTGTATTCAAGAGATACAGATTAAGTTTAGTCGCGTTTTTTGct  
cgagctggcgaattcc  
>CD\_NM\_007053:657  
CgCctGcgagtctGGtatGAAACACCTTGAGTTCAGCCATATTTCAAGAGATATGGCTGAACTCAAGGTGTTGTTTTTGct  
cgagctggcgaattcc  
>CD\_NM\_007053:467

CgCctGcgagtctGGtatGCGGGATAGATGGTGTGGTGAATTCAAGAGATTCACCAACACCATCTATCCCATTTTTGct  
cgagctggcgaattcc  
>CD\_NM\_007053.2:542  
CgCctGcgagtctGGtatGAACCTACCAGTGTGTGCCAGATTCAAGAGATCTGGCACAACACTGGTAGGTCTTTTTGct  
cgagctggcgaattcc  
>CD\_NM\_007053.2:347  
CgCctGcgagtctGGtatGCGTACTGTATGGCATAAGAAAGTTCAAGAGACTTCTTATGCCATACAGTACATTTTTGct  
cgagctggcgaattcc  
>CD\_NM\_007053.2:495  
CgCctGcgagtctGGtatGATCAGTTGATGTTACCATAAGTTCAAGAGACTTATGGTGAACATCAACTGAGTTTTGct  
cgagctggcgaattcc  
>CD\_NM\_007053.2:629  
CgCctGcgagtctGGtatGCACACAGTGACGGGATTGAAACTTCAAGAGAGTTCAATCCCGTCACTGTGTATTTTTGct  
cgagctggcgaattcc  
>CD\_NM\_007053.2:467  
CgCctGcgagtctGGtatGAGGATAGATGGTGTGGTGAATTCAAGAGATTCACCAACACCATCTATCCTTTTGct  
cgagctggcgaattcc  
>CD\_NM\_007053.2:657  
CgCctGcgagtctGGtatGCACACCTTGAGTTCAGCCATAATTCAAGAGATTATGGCTGAACTCAAGGTTTTTTTGct  
cgagctggcgaattcc  
>CD\_NM\_007053.2:279  
CgCctGcgagtctGGtatGCCAGTCTGGTGGATGCATTAATTCAAGAGATTAATGCATCCACCAGACTGGATTTTTGct  
cgagctggcgaattcc  
>CD\_NM\_007053.2:336  
CgCctGcgagtctGGtatGCAAACCTAATCTGTACTGTATGTTCAAGAGACATACAGTACAGATTAAGTTTATTTTTGct  
cgagctggcgaattcc  
>CD\_NM\_007053.2:330  
CgCctGcgagtctGGtatGAGCGACTAAACTTAATCTGTACTTCAAGAGAGTACAGATTAAGTTTAGTCGCGTTTTGct  
cgagctggcgaattcc  
>CD\_NM\_007053.2:633  
CgCctGcgagtctGGtatGAAGTGACGGGATTGAAACAAAGTTCAAGAGACTTGTTTCAATCCCGTCACTGTTTTGct  
cgagctggcgaattcc  
>CD\_NM\_007053.2:473  
CgCctGcgagtctGGtatGAATGGTGTGGTGAATATCATTTCAAGAGAATGATATTTACCAACACCATCTTTTTGct  
cgagctggcgaattcc  
>CD\_NM\_007053.2:600  
CgCctGcgagtctGGtatGCCTCCATTCTATTCACAGAGACTTCAAGAGAGTCTCTGTGAATAGAATGGAGATTTTTGct  
cgagctggcgaattcc  
>CD\_NM\_007053.2:493  
CgCctGcgagtctGGtatGCTCTCAGTTGATGTTACCATATTCAAGAGATATGGTGAACATCAACTGAGATTTTTGct  
cgagctggcgaattcc  
>CD\_NM\_007053.2:542  
CgCctGcgagtctGGtatGCCCTACCAGTGTGTGCCAGAATTCAAGAGATCTGGCACAACACTGGTAGGTTTTTGct  
cgagctggcgaattcc  
>CD\_NM\_007053.2:638  
CgCctGcgagtctGGtatGCCGGGATTGAAACAAAGACAACCTTCAAGAGAGTTGTCTTTGTTTCAATCCCGTTTTGct  
cgagctggcgaattcc  
>CD\_NM\_007053.2:305  
CgCctGcgagtctGGtatGCCAGCTCAGCTTCCCAGGAAGTTCAAGAGACTTCTGGGAAGCTGAGCTGGTTTTGct  
cgagctggcgaattcc  
>CD\_NM\_007053.2:483  
CgCctGcgagtctGGtatGATGAAATATCATCTCAGTTGATTTCAAGAGAATCAACTGAGATGATATTTCACTTTTTGct  
cgagctggcgaattcc  
>CD\_NM\_007053.2:469



CgCctGcgagtctGGtatGAATAGATGGTGTGGTGAATATTCAAGAGATATTTACCAACACCATCTATCTTTTTGct  
cgagctggcgaattcc  
>CD\_NM\_007053.2:531  
CgCctGcgagtctGGtatGCGCACAGTGGGACCTACCAGTGTTC AAGAGACACTGGTAGGTCCCCTGTGCATTTTTGct  
cgagctggcgaattcc  
>CD\_NM\_007053.2:273  
CgCctGcgagtctGGtatGCGGACATCCAGTCTGGTGGATGTTCAAGAGACATCCACCAGACTGGATGTCCATTTTTGct  
cgagctggcgaattcc  
>CD\_NM\_007053.2:250  
CgCctGcgagtctGGtatGACTGGCCATCCTGCTGGCAATTTTCAAGAGAAATTGCCAGCAGGATGGCCAGGTTTTGct  
cgagctggcgaattcc  
>CD\_NM\_007053.2:662  
CgCctGcgagtctGGtatGATTGAGTTCAGCCATAATGAAGTTC AAGAGACTTCATTATGGCTGAACTCAAGTTTTGct  
cgagctggcgaattcc  
>CD\_NM\_007053.2:739  
CgCctGcgagtctGGtatGACTTGTGGCCCTTCAAGCTTTGTTCAAGAGACAAAGCTTGAAGGGCCACAAGTTTTGct  
cgagctggcgaattcc  
>CD\_NM\_007053.2:416  
CgCctGcgagtctGGtatGAACTGTTCTCCTGAGACCAGTTTTCAAGAGAACTGGTCTCAGGAGAACAGTCTTTTTGct  
cgagctggcgaattcc  
>CD\_NM\_007053.2:743  
CgCctGcgagtctGGtatGATGGCCCTTCAAGCTTTGTAAGTTCAAGAGACTTACAAAGCTTGAAGGGCCACTTTTTGct  
cgagctggcgaattcc  
>CD\_NM\_007053.2:308  
CgCctGcgagtctGGtatGCGCTCAGCTTCCCAGGAAGGAATTCAAGAGATTCCTTCTGGGAAGCTGAGCTTTTTGct  
cgagctggcgaattcc  
>CD\_NM\_007053.2:692  
CgCctGcgagtctGGtatGCGTTCAGGCTTCTTACAAGAAATTCAAGAGATTTCTTGTAGGAAGCCTGAACTTTTTGct  
cgagctggcgaattcc  
>CD\_NM\_007053.2:627  
CgCctGcgagtctGGtatGCCTACACAGTGACGGGATTGAATTCAAGAGATTC AATCCCGTCACTGTGTAGTTTTGct  
cgagctggcgaattcc  
>CD\_NM\_007053.2:668  
CgCctGcgagtctGGtatGCTCAGCCATAATGAAGGCACTCTTCAAGAGAGAGTGCCTTCATTATGGCTGAATTTTTGct  
cgagctggcgaattcc  
>CD\_NM\_007053.2:504  
CgCctGcgagtctGGtatGCGTTCACCATAAGCCAAGTCACTTCAAGAGAGTGACTTGGCTTATGGTGAACATTTTTGct  
cgagctggcgaattcc  
>CD\_NM\_002258:98  
CgCctGcgagtctGGtatGCCCCACAGACTCAGGCCCAGAATTCAAGAGATTC TGGGCCTGAGTCTGTGGGTTTTGct  
cgagctggcgaattcc  
>CD\_NM\_002258:328  
CgCctGcgagtctGGtatGAGGGTCTCTTAAACTGCCCAATTTCAAGAGAATTGGGCAGTTTAAGAGACCCGTTTTGct  
cgagctggcgaattcc  
>CD\_NM\_002258:363  
CgCctGcgagtctGGtatGATCCGAGAGAAATGCTTGTATTTC AAGAGAATAACAAGCATTCTCTCGGAGTTTTGct  
cgagctggcgaattcc  
>CD\_NM\_002258:418  
CgCctGcgagtctGGtatGCAGCTGATTGTTCCACCAAAGATTCAAGAGATCTTTGGTGGAAACAATCAGCTATTTTTGct  
cgagctggcgaattcc  
>CD\_NM\_002258:444  
CgCctGcgagtctGGtatGCGCCTGCTGCTTATTCGAGATATTCAAGAGATATCTCGAATAAGCAGCAGGCTTTTTGct  
cgagctggcgaattcc  
>CD\_NM\_002258:489

CgCctGcgagtctGGtatGCACCTGATACGTGACAAAGCAATTCAAGAGATTGCTTTGTACGTATCAGGTTTTTTTTGct  
cgagctggcgaattcc  
>CD\_NM\_002258.156  
CgCctGcgagtctGGtatGAAGGGTTCACCTTGGCATCAATTTCAAGAGAATTGATGCCAAGGTGAACCTGTTTTTTGct  
cgagctggcgaattcc  
>CD\_NM\_002258.2:481  
CgCctGcgagtctGGtatGAACACAGAACCTGATACGTGACTTCAAGAGAGTACGTATCAGGTTCTGTGTGTTTTTTGct  
cgagctggcgaattcc  
>CD\_NM\_002258.2:330  
CgCctGcgagtctGGtatGATCTCTTAAACTGCCCAATATATTCAAGAGATATATTGGGCAGTTTAAGAGACTTTTTTGct  
cgagctggcgaattcc  
>CD\_NM\_002258.2:712  
CgCctGcgagtctGGtatGAAGAAATAAAGTGTATCCTGACTTCAAGAGAGTCAGGATACACTTTATTTCTCTTTTTGct  
cgagctggcgaattcc  
>CD\_NM\_002258.2:207  
CgCctGcgagtctGGtatGCTCTCCTTGTCTTGGTTGTTACTTCAAGAGAGTAACAACCAAGACAAGGAGAATTTTTGct  
cgagctggcgaattcc  
>CD\_NM\_002258.2:599  
CgCctGcgagtctGGtatGCTTAGAGGTGATGCTAAAGAAATTTCAAGAGATTTCTTTAGCATCACCTTAATTTTTTTGct  
cgagctggcgaattcc  
>CD\_NM\_002258.2:352  
CgCctGcgagtctGGtatGCTGGCAGCAACTCCGAGAGAAATTTCAAGAGATTTCTCTCGGAGTTGCTGCCAATTTTTGct  
cgagctggcgaattcc  
>CD\_NM\_002258.2:237  
CgCctGcgagtctGGtatGATGTTTCAGTGACATCCTTAATTTCAAGAGAATTAAGGATGTCACTGAAACACTTTTTGct  
cgagctggcgaattcc  
>CD\_NM\_002258.2:243  
CgCctGcgagtctGGtatGAAGTGACATCCTTAATACAGAATTTCAAGAGATTTCTGTATTAAGGATGTCACTGTTTTTTGct  
cgagctggcgaattcc  
>CD\_NM\_002258.2:167  
CgCctGcgagtctGGtatGCGGCATCAATTTGCCCTGAAACTTCAAGAGAGTTTCAGGGCAAATTTGATGCCATTTTTGct  
cgagctggcgaattcc  
>CD\_NM\_002258.2:199  
CgCctGcgagtctGGtatGCGGGATTATTTCTCCTTGTCTTGTTCAGAGACAAGACAAGGAGAATAATCCATTTTTGct  
cgagctggcgaattcc  
>CD\_NM\_002258.2:241  
CgCctGcgagtctGGtatGCTCAGTGACATCCTTAATACAGTTCAAGAGACTGTATTAAGGATGTCACTGAATTTTTGct  
cgagctggcgaattcc  
>CD\_NM\_002258.2:442  
CgCctGcgagtctGGtatGAAGCCTGCTGCTTATTCGAGATTTCAAGAGAATCTCGAATAAGCAGCAGGCTGTTTTTTGct  
cgagctggcgaattcc  
>CD\_NM\_002258.2:235  
CgCctGcgagtctGGtatGAAGTGTTCAGTGACATCCTTATTCAAGAGATAAGGATGTCACTGAAACACTTTTTTTGct  
cgagctggcgaattcc  
>CD\_NM\_002258.2:110  
CgCctGcgagtctGGtatGAGCCCAGAAAGTTCTTCACCTTTTCAAGAGAAAGGTGAAGAACTTTCTGGGCCTTTTTGct  
cgagctggcgaattcc  
>CD\_NM\_002258.2:71  
CgCctGcgagtctGGtatGAAAGCAATATATGCTGAGTTAATTTCAAGAGATTAACTCAGCATATATTGCTTGTTTTTGct  
cgagctggcgaattcc  
>CD\_NM\_002258.2:318  
CgCctGcgagtctGGtatGAAGAGAGACCGGGTCTCTTAAATTTCAAGAGATTTAAGAGACCCGGTCTCTGTTTTTTGct  
cgagctggcgaattcc  
>CD\_NM\_002258.2:364

CgCctGcgagtctGGtatGACGAGAGAAATGCTTGTATTTTTCAAGAGAAAATAACAAGCATTTCTCTCGGTTTTTGct  
cgagctggcgaattcc  
>CD\_NM\_002258.2:389  
CgCctGcgagtctGGtatGAACACTGTCAACCCTTGAATATTTCAAGAGATATTTCAAGGGTTGACAGTGTTTTTTGct  
cgagctggcgaattcc  
>CD\_NM\_002258.2:143  
CgCctGcgagtctGGtatGAGGGATGTCTGTCTCAGGGTTCACTTCAAGAGAGTGAACCCTGACAGACATCCCGTTTTTGct  
cgagctggcgaattcc  
>CD\_NM\_002258.2:418  
CgCctGcgagtctGGtatGCGCTGATTGTTCCACCAAAGAATTCAAGAGATTTCTTGGTGGAACAATCAGCTTTTTTGct  
cgagctggcgaattcc  
>CD\_NM\_002258.2:231  
CgCctGcgagtctGGtatGAGTTGAGTGTTCAGTGACATCTTCAAGAGAGATGTCACTGAAACACTCAACCCTTTTTGct  
cgagctggcgaattcc  
>CD\_NM\_002258.2:391  
CgCctGcgagtctGGtatGAACTGTCAACCCTTGAATAACTTCAAGAGAGTTATTTCAAGGGTTGACAGTGTTTTTGct  
cgagctggcgaattcc  
>CD\_NM\_002258.2:98  
CgCctGcgagtctGGtatGACCACAGACTCAGGCCAGAAATTTCAAGAGATTTCTGGGCCTGAGTCTGTGGTTTTTGct  
cgagctggcgaattcc  
>CD\_NM\_002258.2:158  
CgCctGcgagtctGGtatGAGTTCACCTTGGCATCAATTTGTTCAAGAGACAAATTTGATGCCAAGGTGAACCTTTTTGct  
cgagctggcgaattcc  
>CD\_NM\_002258.2:205  
CgCctGcgagtctGGtatGCATTCTCCTTGTCTTGGTTGTTTTCAAGAGAAACAACCAAGACAAGGAGAATTTTTTGct  
cgagctggcgaattcc  
>CD\_NM\_002258.2:716  
CgCctGcgagtctGGtatGCATAAAGTGATCCTGACTCTTTTTCAAGAGAAAGAGTCAGGATACACTTTATTTTTTTGct  
cgagctggcgaattcc  
>CD\_NM\_003006:275  
CgCctGcgagtctGGtatGAACCGGAGACAGGCCACCGAATTTCAAGAGAATTCGGTGGCCTGTCTCCGGTCTTTTTGct  
cgagctggcgaattcc  
>CD\_NM\_003006:290  
CgCctGcgagtctGGtatGCCGAATATGAGTACCTAGATTTTTCAAGAGAAATCTAGGTACTCATATTCGGTTTTTTGct  
cgagctggcgaattcc  
>CD\_NM\_003006:1214  
CgCctGcgagtctGGtatGCTGGTCTGCATCTCATCCCTGTTTTCAAGAGAACAGGGATGAGATGCAGACCATTTTTTGct  
cgagctggcgaattcc  
>CD\_NM\_003006.3:286  
CgCctGcgagtctGGtatGACCACCGAATATGAGTACCTAGTTCAAGAGACTAGGTACTCATATTCGGTGGCTTTTTGct  
cgagctggcgaattcc  
>CD\_NM\_003006.3:1208  
CgCctGcgagtctGGtatGACGAGATGGTCTGCATCTCATCTTCAAGAGAGATGAGATGCAGACCATCTCGGTTTTTGct  
cgagctggcgaattcc  
>CD\_NM\_003006.3:1118  
CgCctGcgagtctGGtatGCGGCCACTATCTTCTTCGTGTGTTCAAGAGACACACGAAGAAGATAGTGGCCATTTTTGct  
cgagctggcgaattcc  
>CD\_NM\_003006.3:1214  
CgCctGcgagtctGGtatGCGGTCTGCATCTCATCCCTGTTTTCAAGAGAAACAGGGATGAGATGCAGACCATTTTTGct  
cgagctggcgaattcc  
>CD\_NM\_003006.3:162  
CgCctGcgagtctGGtatGACCTCTGCAACTCCTCCTGTTGTTCAAGAGACAACAGGAGGAGTTGCAGAGGCTTTTTGct  
cgagctggcgaattcc  
>CD\_NM\_003006.3:1062

CgCctGcgagtctGGtatGACCAGACCACATCTCTGTGAAGTTCAAGAGACTTCACAGAGATGTGGTCTGGGTTTTTGct  
cgagctggcgaattcc  
>CD\_NM\_003006.3:1347  
CgCctGcgagtctGGtatGACTGCACAGCTTCCCTCCCTTAGTTCAAGAGACTAAGGGAGGAAGCTGTGCAGTTTTTGct  
cgagctggcgaattcc  
>CD\_NM\_003006.3:1002  
CgCctGcgagtctGGtatGCACTCACAAAGGCATTTCCCATGTTCAAGAGACATGGGAATGCCCTTGTGAGTATTTTTGct  
cgagctggcgaattcc  
>CD\_NM\_003006.3:333  
CgCctGcgagtctGGtatGACCTCCAGAAATGCTGAGGAACTTCAAGAGAGTTCCCTCAGCATTTCTGGAGGCTTTTTGct  
cgagctggcgaattcc  
>CD\_NM\_003006.3:569  
CgCctGcgagtctGGtatGAAGCCACAGAGGCACAGACAACCTTCAAGAGAGTTGTCTGTGCCTCTGTGGCTGTTTTGct  
cgagctggcgaattcc  
>CD\_NM\_003006.3:1164  
CgCctGcgagtctGGtatGATCCCAGGGCCACATGTACTTCAAGAGAGTACATGTGGCCCTTGCGGGAGTTTTTGct  
cgagctggcgaattcc  
>CD\_NM\_003006.3:996  
CgCctGcgagtctGGtatGATCTGTTACTCACAAGGGCATTTCCTCAAGAGAAATGCCCTTGTGAGTAACAGAGTTTTGct  
cgagctggcgaattcc  
>CD\_NM\_003006.3:1025  
CgCctGcgagtctGGtatGAAGCCAGCAATTTGTCCGTCAATTCCTCAAGAGATTGACGGACAAATTGCTGGCTTTTTGct  
cgagctggcgaattcc  
>CD\_NM\_003006.3:1026  
CgCctGcgagtctGGtatGCGCCAGCAATTTGTCCGTCAACTTCAAGAGAGTTGACGGACAAATTGCTGGCTTTTTGct  
cgagctggcgaattcc  
>CD\_NM\_003006.3:933  
CgCctGcgagtctGGtatGAACAGAGGCCCTGTCCATGGAATTCCTCAAGAGATTCATGGACAGGGCCTCTGTGTTTTGct  
cgagctggcgaattcc  
>CD\_NM\_003006.3:344  
CgCctGcgagtctGGtatGCGCTGAGGAACAGCACTGACACTTCAAGAGAGTGTGAGTGTCTGTTCCCTCAGCATTTTTGct  
cgagctggcgaattcc  
>CD\_NM\_003006.3:1085  
CgCctGcgagtctGGtatGCGTGCCTGCTGGCCATCCTAATTTCAAGAGAATTAGGATGGCCAGCAGGCACTTTTTGct  
cgagctggcgaattcc  
>CD\_NM\_003006.3:390  
CgCctGcgagtctGGtatGACCTGAGTCTACCCTGTGGAGTTCAAGAGACTCCACAGTGGTAGACTCAGGGTTTTTGct  
cgagctggcgaattcc  
>CD\_NM\_003006.3:785  
CgCctGcgagtctGGtatGCGGAGGCACAGACCACTCAAACCTTCAAGAGAGTTTGTGAGTGGTCTGTGCCTCCATTTTTGct  
cgagctggcgaattcc  
>CD\_NM\_003006.3:174  
CgCctGcgagtctGGtatGACTCCTGTTGCTGATCCTACTGTTCAAGAGACAGTAGGATCAGCAACAGGAGTTTTTGct  
cgagctggcgaattcc  
>CD\_NM\_003006.3:288  
CgCctGcgagtctGGtatGAACCGAATATGAGTACCTAGATTTCAAGAGAATCTAGGTACTCATATTCGGTGTTTTTGct  
cgagctggcgaattcc  
>CD\_NM\_003006.3:966  
CgCctGcgagtctGGtatGCAGAGGTCTGTTTCATACCCTTTTTTCAAGAGAAAAGGGTATGAACAGACCTTTTTTGct  
cgagctggcgaattcc  
>CD\_NM\_003006.3:1089  
CgCctGcgagtctGGtatGACTGCTGGCCATCCTAATCTTGTTCCTCAAGAGACAAGATTAGGATGGCCAGCAGTTTTGct  
cgagctggcgaattcc  
>CD\_NM\_003006.3:504

CgCctGcgagtctGGtatGCTCAGCAGCTATGGAGATACAGTTCAAGAGACTGTATCTCCATAGCTGCTGAATTTTTTGct  
cgagctggcgaattcc  
>CD\_NM\_003006.3:400  
CgCctGcgagtctGGtatGCCACTGTGGAGCCTGCTGCAATTC AAGAGATTGCAGCAGGCTCCACAGTGGTTTTTTGct  
cgagctggcgaattcc  
>CD\_NM\_003006.3:275  
CgCctGcgagtctGGtatGCCGGAGACAGGCCACCGAATATTC AAGAGATATTCGGTGGCCTGTCTCCGGTTTTTTGct  
cgagctggcgaattcc  
>CD\_NM\_003006.3:306  
CgCctGcgagtctGGtatGCGATTATGATTTCCCTGCCAGAATTC AAGAGATTCTGGCAGGAAATCATAATCTTTTTTTGct  
cgagctggcgaattcc  
>CD\_NM\_003006.3:319  
CgCctGcgagtctGGtatGATGCCAGAAACGGAGCCTCCAGTTCA AAGAGACTGGAGGCTCCGTTTCTGGCAGTTTTTTGct  
cgagctggcgaattcc  
>CD\_NM\_003006.3:494  
CgCctGcgagtctGGtatGCGTCCACGGATTCAGCAGCTATTTCA AAGAGAATAGCTGCTGAATCCGTGGACATTTTTTTGct  
cgagctggcgaattcc  
>CD\_NM\_003006.3:629  
CgCctGcgagtctGGtatGAAGCCACAGAGGCACAGACCACCTTCA AAGAGAGTGGTCTGTGCCTCTGTGGCTGTTTTTTGct  
cgagctggcgaattcc  
>CD\_NM\_004244:3282  
CgCctGcgagtctGGtatGATCGCATTATTCTTCTTGACTATTCA AAGAGATAGTCAAGAAGAATAATGCGACTTTTTTTGct  
cgagctggcgaattcc  
>CD\_NM\_004244:3157  
CgCctGcgagtctGGtatGATGCAGTGAATTGCACAGATATTTCA AAGAGAATATCTGTGCAATTC ACTGCAGTTTTTTGct  
cgagctggcgaattcc  
>CD\_NM\_004244:533  
CgCctGcgagtctGGtatGAACCTGCTCAGATGGATCCAATTTCA AAGAGAATGGATCCATCTGAGCAGGTCTTTTTTTGct  
cgagctggcgaattcc  
>CD\_NM\_004244:418  
CgCctGcgagtctGGtatGAACGCATTTGGATGGATCATGTTTTCA AAGAGAACATGATCCATCCAAATGCGTCTTTTTTTGct  
cgagctggcgaattcc  
>CD\_NM\_004244:578  
CgCctGcgagtctGGtatGCGGGAATATGTGTTCTGGAAGATTCA AAGAGATCTTCCAGAACACATATTCCTTTTTTTGct  
cgagctggcgaattcc  
>CD\_NM\_004244:2233  
CgCctGcgagtctGGtatGATGGTCAACTTCGCCTGGTAAATTC AAGAGATTTACCAGGCGAAGTTGACCACTTTTTTTGct  
cgagctggcgaattcc  
>CD\_NM\_004244.3:334  
CgCctGcgagtctGGtatGCGCGGTCTCTGTGATTTGTA ACTTCAAGAGAGTTACAAATCACAGAGACCGCTTTTTTTGct  
cgagctggcgaattcc  
>CD\_NM\_004244.3:751  
CgCctGcgagtctGGtatGATTTGATGATCTTATATGCAACTTCA AAGAGAGTTGCATATAAGATCATCAAACTTTTTTGct  
cgagctggcgaattcc  
>CD\_NM\_004244.3:1172  
CgCctGcgagtctGGtatGATGACATGTTCTGATGGATCAGTTCA AAGAGACTGATCCATCAGAACATGTCACTTTTTTGct  
cgagctggcgaattcc  
>CD\_NM\_004244.3:2078  
CgCctGcgagtctGGtatGCCTGCTCTAGGTGCTTCATTATTTCA AAGAGAATAATGAAGCACCTAGAGCAGTTTTTTGct  
cgagctggcgaattcc  
>CD\_NM\_004244.3:899  
CgCctGcgagtctGGtatGATCACTGAATGTT CAGGAAGATTTCAAGAGAATCTTCCTGAACATTCAGTGACTTTTTTTGct  
cgagctggcgaattcc  
>CD\_NM\_004244.3:1252

CgCctGcgagtctGGtatGAATTCAGAGACTGTTAGGGAAGTTCAAGAGACTTCCCTAACAGTCTCTGAATCTTTTTGct  
cgagctggcgaattcc  
>CD\_NM\_004244.3:2436  
CgCctGcgagtctGGtatGCTGAGATGAAATGCAATGGAAATTCAGAGATTTCCATTGCATTTTCATCTCATTTTTTgct  
cgagctggcgaattcc  
>CD\_NM\_004244.3:2936  
CgCctGcgagtctGGtatGAGGACAGTGTGTGATGACTCTTTTTCAAGAGAAAGAGTCATCACACACTGTCCCTTTTTGct  
cgagctggcgaattcc  
>CD\_NM\_004244.3:3397  
CgCctGcgagtctGGtatGCGCAGATGATCTGGACCTAATGTTCAAGAGACATTAGGTCCAGATCATCTGCATTTTTGct  
cgagctggcgaattcc  
>CD\_NM\_004244.3:701  
CgCctGcgagtctGGtatGATCAGTTTCTCTGGTTCATCTATTCAAGAGATAGATGAACCAGAGAACTGACTTTTTGct  
cgagctggcgaattcc  
>CD\_NM\_004244.3:1398  
CgCctGcgagtctGGtatGCTCTAAGTAGCTGTAACGGAAATTCAGAGATTTCCGTTACAGCTACTTAGAATTTTTGct  
cgagctggcgaattcc  
>CD\_NM\_004244.3:897  
CgCctGcgagtctGGtatGAAGTCACTGAATGTTCAAGAGACTTCCGTTAACATTGAGTACTTTTTTgct  
cgagctggcgaattcc  
>CD\_NM\_004244.3:756  
CgCctGcgagtctGGtatGCTGATCTTATATGCAACGGAAATTCAGAGATTTCCGTTGCATATAAGATCATTTTTTgct  
cgagctggcgaattcc  
>CD\_NM\_004244.3:576  
CgCctGcgagtctGGtatGAAGGGAATATGTGTTCTGGAAGTTCAAGAGACTTCCAGAACACATATCCCTTTTTTgct  
cgagctggcgaattcc  
>CD\_NM\_004244.3:746  
CgCctGcgagtctGGtatGCTCTGGTTTGATGATCTTATATTTCAAGAGAATATAAGATCATCAAACCAGATTTTTTgct  
cgagctggcgaattcc  
>CD\_NM\_004244.3:1237  
CgCctGcgagtctGGtatGAACAGTTGAGGTGGAGATTCAGTTCAAGAGACTGAATCTCCACCTCAACTGTCTTTTTGct  
cgagctggcgaattcc  
>CD\_NM\_004244.3:2118  
CgCctGcgagtctGGtatGACTCTGTAATCTGCTCAGGAAATTCAGAGATTTCCCTGAGCAGATTACAGAGTTTTTgct  
cgagctggcgaattcc  
>CD\_NM\_004244.3:271  
CgCctGcgagtctGGtatGAAGAGTGAAGTGAAAGTCCAGTTCAAGAGACTGGACTTTCACTTCCACTCTTTTTTgct  
cgagctggcgaattcc  
>CD\_NM\_004244.3:1220  
CgCctGcgagtctGGtatGAGCAGCCGCTGTGCTGGGACAGTTCAAGAGACTGTCCAGCACAGCGGCTGCCTTTTTGct  
cgagctggcgaattcc  
>CD\_NM\_004244.3:2145  
CgCctGcgagtctGGtatGACCAAACACTGTCCTCGTCAATTCAAGAGATTGCACGAGGACAGTGTGGGTTTTTgct  
cgagctggcgaattcc  
>CD\_NM\_004244.3:3219  
CgCctGcgagtctGGtatGAATCCCGTCAGTCATCCTTTATTTCAAGAGAATAAAGGATGACTGACGGGATTTTTTgct  
cgagctggcgaattcc  
>CD\_NM\_004244.3:3282  
CgCctGcgagtctGGtatGCCGCATTATCTTCTTGACTAATTCAAGAGATTAGTCAAGAAGAATAATGCGATTTTTTgct  
cgagctggcgaattcc  
>CD\_NM\_004244.3:3098  
CgCctGcgagtctGGtatGCTGTGGGATTGTCCTGCCAGACTTCAAGAGAGTCTGGCAGGACAATCCCACAATTTTTGct  
cgagctggcgaattcc  
>CD\_NM\_004244.3:362

CgCctGcgagtctGGtatGAGATGTCCAACCTGCTATCAAAGTTCAAGAGACTTTGATAGCAGTTGGACATCCTTTTTTGct  
cgagctggcgaattcc  
>CD\_NM\_004244.3:2551  
CgCctGcgagtctGGtatGATCTCTGAGACTGACCAGTGAATTC AAGAGATTCACTGGTCAGTCTCAGAGACTTTTTTGct  
cgagctggcgaattcc  
>CD\_NM\_004244.3:1910  
CgCctGcgagtctGGtatGCACTCTCACTGGGACATAGAAGTTCAAGAGACTTCTATGTCCCAGTGAGAGTTTTTTTTGct  
cgagctggcgaattcc  
>CD\_NM\_004244.3:265  
CgCctGcgagtctGGtatGCAGCGGGAGAGTGGAAGTGAAATTC AAGAGATTTCACTTCCACTCTCCCGCTATTTTTTGct  
cgagctggcgaattcc  
>CD\_NM\_006016.3:187  
CgCctGcgagtctGGtatGCAGCGCCCATCTCCAACGTAAC TCAAGAGAGTTACGTTGGAGATGGGCGCTATTTTTTGct  
cgagctggcgaattcc  
>CD\_NM\_006016.3:519  
CgCctGcgagtctGGtatGCACACTGTGACTCCAACCTCACT TCAAGAGAGTGAGGTTGGAGTCACAGTGTTTTTTTGct  
cgagctggcgaattcc  
>CD\_NM\_006016.3:340  
CgCctGcgagtctGGtatGCTGAGAGCTATTGTTACATAAT TCAAGAGATTATGTGAACAATAGCTCTCATTTTTTTGct  
cgagctggcgaattcc  
>CD\_NM\_006016.3:363  
CgCctGcgagtctGGtatGCCAACAGTTAGTGATTGTCAAG TTCAAGAGACTTGACAATCACTAACTGTTGATTTTTTGct  
cgagctggcgaattcc  
>CD\_NM\_006016.3:570  
CgCctGcgagtctGGtatGACCAGTTTCATTGGAGGAATTG TTCAAGAGACAATTCCTCCAATGAAACTGGCTTTTTTTGct  
cgagctggcgaattcc  
>CD\_NM\_006016.3:538  
CgCctGcgagtctGGtatGAACAACCTGTGCGAAAGTCTAC TTTCAAGAGAGTAGACTTTCGCACAGGTTGTGTTTTTTGct  
cgagctggcgaattcc  
>CD\_NM\_006016.3:446  
CgCctGcgagtctGGtatGCACAGCTAAACCCACAGTTCA GTTCAAGAGACTGAACTGTGGGTTTAGCTGTATTTTTTGct  
cgagctggcgaattcc  
>CD\_NM\_006016.3:345  
CgCctGcgagtctGGtatGCGCTATTGTTACATAACTCAAT TCAAGAGATTGAGTTATGTGAACAATAGCTTTTTTTGct  
cgagctggcgaattcc  
>CD\_NM\_006016.3:434  
CgCctGcgagtctGGtatGCACAGCCAATTCTACAGCTAAAT TCAAGAGATTTAGCTGTAGAATTGGCTGTTTTTTTTGct  
cgagctggcgaattcc  
>CD\_NM\_006016.3:493  
CgCctGcgagtctGGtatGAAGTTACTACATCAGGTACAAC TTCAAGAGAGTTGTACCTGATGTAGTAACTGTTTTTTGct  
cgagctggcgaattcc  
>CD\_NM\_006016.3:88  
CgCctGcgagtctGGtatGAGCTCTCCCGCTCACTGCTTTG TTCAAGAGACAAAGCAGTGAGCGGGAGAGCCTTTTTTGct  
cgagctggcgaattcc  
>CD\_NM\_006016.3:427  
CgCctGcgagtctGGtatGAAGTGCCAACAGCCAATTCTACT TCAAGAGAGTAGAATTGGCTGTTGGCACTGTTTTTTGct  
cgagctggcgaattcc  
>CD\_NM\_006016.3:581  
CgCctGcgagtctGGtatGCGGAGGAATTGTCCTGGTCTTGT TCAAGAGACAAGACCAGGACAATTCCTCCATTTTTTTGct  
cgagctggcgaattcc  
>CD\_NM\_006016.3:352  
CgCctGcgagtctGGtatGATTCACATAACTCAACAGTTAG TTCAAGAGACTAACTGTTGAGTTATGTGAACTTTTTTGct  
cgagctggcgaattcc  
>CD\_NM\_006016.3:414

CgCtGcgagtctGGtatGCCACGGCCACTCCAGTGCCAATTCAAGAGATTGGCACTGGAGTGGCCGTGGATTTTTGct  
cgagctggcgaattcc  
>CD\_NM\_006016.3:653  
CgCtGcgagtctGGtatGCCGAAATTACCACACTCTGTAATTCAAGAGATTACAGAGTGTGGTAATTCGTTTTTTGct  
cgagctggcgaattcc  
>CD\_NM\_006016.3:498  
CgCtGcgagtctGGtatGCCTACATCAGGTACAACAAATATTCAAGAGATATTTGTTGTACCTGATGTAGTTTTTTGct  
cgagctggcgaattcc  
>CD\_NM\_006016.3:636  
CgCtGcgagtctGGtatGCTCTGCAAACTAAAGAACGAATTCAAGAGATTCGTTCTTTAGATTTGCAGAATTTTTGct  
cgagctggcgaattcc  
>CD\_NM\_006016.3:495  
CgCtGcgagtctGGtatGATTACTACATCAGGTACAACAATTCAAGAGATTGTTGTACCTGATGTAGTAACTTTTGct  
cgagctggcgaattcc  
>CD\_NM\_006016.3:600  
CgCtGcgagtctGGtatGCTGGGTGTGCAGGCTGTAATTTTTCAAGAGAAAATTACAGCCTGCACACCCAATTTTTGct  
cgagctggcgaattcc  
>CD\_NM\_006016.3:393  
CgCtGcgagtctGGtatGCCGACAGACTTCTGTTCCGTTTTTCAAGAGAAAACGGAACAGAAGTCTGTCGTTTTTTGct  
cgagctggcgaattcc  
>CD\_NM\_006016.3:124  
CgCtGcgagtctGGtatGCGGGCGTGCTCTGCGTGCTCTTCAAGAGAGACAGCACGCAGAGCACGCCATTTTTGct  
cgagctggcgaattcc  
>CD\_NM\_006016.3:397  
CgCtGcgagtctGGtatGAAGACTTCTGTTCCGTTTCCACTTCAAGAGAGTGGAAACGGAACAGAAGTCTGTTTTTTGct  
cgagctggcgaattcc  
>CD\_NM\_006016.3:568  
CgCtGcgagtctGGtatGAAGCCAGTTTCATTGGAGGAATTTCAAGAGAATTCCTCCAATGAACTGGCTGTTTTTTGct  
cgagctggcgaattcc  
>CD\_NM\_006016.3:133  
CgCtGcgagtctGGtatGCCTGCGTGCTGTCCGCGGACAATTCAAGAGATTGTCCGCGGACAGCACGCAGATTTTTGct  
cgagctggcgaattcc  
>CD\_NM\_006016.3:587  
CgCtGcgagtctGGtatGCATTGTCTGCTTGGGTGTGTTCAAGAGACACACCCAAGACCAGGACAATTTTTTTGct  
cgagctggcgaattcc  
>CD\_NM\_006016.3:137  
CgCtGcgagtctGGtatGAGTGCTGTCCGCGGACAAGAACTTCAAGAGAGTTCTTGTCCGCGGACAGCACGTTTTTTGct  
cgagctggcgaattcc  
>CD\_NM\_006016.3:596  
CgCtGcgagtctGGtatGAGTCTTGGGTGTGCAGGCTGTATTCAAGAGATACAGCCTGCACACCCAAGACCTTTTTGct  
cgagctggcgaattcc  
>CD\_NM\_006016.3:474  
CgCtGcgagtctGGtatGACTTCTACAACCTCCAAGACAGTTCAAGAGACTGTCTTGAAGTTGTAGAAGTTTTTTGct  
cgagctggcgaattcc  
>CD\_NM\_006016.3:295  
CgCtGcgagtctGGtatGCTGTTAGCGTTGTTAATACTACTTCAAGAGAGTAGTATTAACAACGCTAACATTTTTTTGct  
cgagctggcgaattcc  
>CD\_NM\_006016.3:265  
CgCtGcgagtctGGtatGCAGGTCGAAACAGCTGCGTTTTCTTCAAGAGAGAAACGCAGCTGTTTCGACCTTTTTTTGct  
cgagctggcgaattcc  
>CD\_NM\_006016.3:566  
CgCtGcgagtctGGtatGCGCAGCCAGTTTCATTGGAGGATTCAAGAGATCCTCCAATGAACTGGCTGCATTTTTTTGct  
cgagctggcgaattcc  
>CD\_NM\_006016.3:167



CgCctGcgagtctGGtatGACACCCGAACGTGACGACTTTATTCAAGAGATAAAGTCGTACGTTCCGGTGCTTTTTTGct  
cgagctggcgaattcc  
>CD\_NM\_001627:606  
CgCctGcgagtctGGtatGAAGGCCAGGCCTTGGATGGTATTTCAAGAGAATACCATCCAAGGCCTGGCCTGTTTTTGct  
cgagctggcgaattcc  
>CD\_NM\_001627:612  
CgCctGcgagtctGGtatGCGGCCTTGGATGGTATACTGTATTCAAGAGATACAGTATACCATCCAAGGCCTTTTTTGct  
cgagctggcgaattcc  
>CD\_NM\_001627:898  
CgCctGcgagtctGGtatGCACGTGTTTGAGGCACCTACAATTCAAGAGATTGTAGGTGCCTCAAACACGTTTTTTTGct  
cgagctggcgaattcc  
>CD\_NM\_001627:925  
CgCctGcgagtctGGtatGCAGGTGTTCAAGCAACCATCTATTCAAGAGATAGATGGTTGCTTGAACACCTTTTTTTGct  
cgagctggcgaattcc  
>CD\_NM\_001627:1405  
CgCctGcgagtctGGtatGACCGAAGGAATAAGAAGCTCAATTCAAGAGATTGAGCTTCTTATTCTTCGGGTTTTTTGct  
cgagctggcgaattcc  
>CD\_NM\_001627:1585  
CgCctGcgagtctGGtatGACCCTACCCGTGTCATGCACAATTCAAGAGATTGTGCATGACACGGGTAGGGCTTTTTTGct  
cgagctggcgaattcc  
>CD\_NM\_001627.2:1757  
CgCctGcgagtctGGtatGATCATTGACTCTCATTGTAGAATTCAAGAGATTCTACAATGAGAGTCAATGACTTTTTTGct  
cgagctggcgaattcc  
>CD\_NM\_001627.2:965  
CgCctGcgagtctGGtatGCGCACTGTTTCTCGAAACAGAGTTCAAGAGACTCTGTTTCGAGAAAACAGTGCTTTTTTTGct  
cgagctggcgaattcc  
>CD\_NM\_001627.2:1274  
CgCctGcgagtctGGtatGCACAGAGCAGGTGACAATACAATTCAAGAGATTGTATTGTCACCTGCTCTGTATTTTTTGct  
cgagctggcgaattcc  
>CD\_NM\_001627.2:1867  
CgCctGcgagtctGGtatGAAGCCATTCAATGGACAATTACTTCAAGAGAGTAATTGTCCATTGAATGGCTGTTTTTTGct  
cgagctggcgaattcc  
>CD\_NM\_001627.2:823  
CgCctGcgagtctGGtatGCCTACACTTTGTCTATCAGTAATTCAAGAGATTACTGATAGACAAAGTGTAGTTTTTTTGct  
cgagctggcgaattcc  
>CD\_NM\_001627.2:1003  
CgCctGcgagtctGGtatGATGACTGCATTTTCAGAAGACAGTTCAAGAGACTGTCTTCTGAAATGCAGTCACTTTTTTGct  
cgagctggcgaattcc  
>CD\_NM\_001627.2:1755  
CgCctGcgagtctGGtatGAAGTCATTGACTCTCATTGTAGTTCAAGAGACTACAATGAGAGTCAATGACTCTTTTTTGct  
cgagctggcgaattcc  
>CD\_NM\_001627.2:1337  
CgCctGcgagtctGGtatGAACTCTTAAATGCTTAGGGAATTTCAAGAGAATTCCTAAGCATTAAAGAGTGTTTTTTGct  
cgagctggcgaattcc  
>CD\_NM\_001627.2:742  
CgCctGcgagtctGGtatGCTGCCTTCAGATCCTCTACAAATTCAAGAGATTGTAGAGGATCTGAAGGCAATTTTTTGct  
cgagctggcgaattcc  
>CD\_NM\_001627.2:2031  
CgCctGcgagtctGGtatGCTGAATGTCTCTGCTATAAGTATTCAAGAGATACTTATAGCAGAGACATTCAATTTTTTGct  
cgagctggcgaattcc  
>CD\_NM\_001627.2:1585  
CgCctGcgagtctGGtatGACCTACCCGTGTCATGCACAATTTCAAGAGAATTGTGCATGACACGGGTAGGGTTTTTTGct  
cgagctggcgaattcc  
>CD\_NM\_001627.2:917

CgCtGcgagtctGGtatGCATAGTCAAGGTGTTCAAGCAATTCAAGAGATTGCTTGAACACCTTACTATTTTTTTGct  
cgagctggcgaattcc  
>CD\_NM\_001627.2:1186  
CgCtGcgagtctGGtatGCGCCATTACCTGCTCGGTGACTTCAAGAGAGTCACCGAGCAGGTGAATGGCATTTTTTGct  
cgagctggcgaattcc  
>CD\_NM\_001627.2:1968  
CgCtGcgagtctGGtatGACTGAAGAGAATGTTACATTAATTCAAGAGATTAATGTAACATTCTCTCAGGTTTTTGTct  
cgagctggcgaattcc  
>CD\_NM\_001627.2:2027  
CgCtGcgagtctGGtatGATCCTTGAATGTCTCTGCTATATTCAAGAGATATAGCAGAGACATTCAAGGAGTTTTTGTct  
cgagctggcgaattcc  
>CD\_NM\_001627.2:829  
CgCtGcgagtctGGtatGATTTGTCTATCAGTAATGCAAGTTCAAGAGACTTGCATTACTGATAGACAAAGTTTTTGTct  
cgagctggcgaattcc  
>CD\_NM\_001627.2:568  
CgCtGcgagtctGGtatGATCTGCTCTTCTGCCTCTTGATTTCAAGAGAATCAAGAGGCAGAAGAGCAGACTTTTTTGTct  
cgagctggcgaattcc  
>CD\_NM\_001627.2:612  
CgCtGcgagtctGGtatGAGCCTTGGATGGTATACTGTAATTCAAGAGATTACAGTATACCATCCAAGCCTTTTTTGTct  
cgagctggcgaattcc  
>CD\_NM\_001627.2:1116  
CgCtGcgagtctGGtatGAACCCAGTGACTCAGCTCTATATTCAAGAGATATAGAGCTGAGTCACTGGGTCTTTTTTGTct  
cgagctggcgaattcc  
>CD\_NM\_001627.2:1763  
CgCtGcgagtctGGtatGAACTCTCATTGTAGAAAGGCAAATTCAAGAGATTTGCCTTCTACAATGAGAGTCTTTTTTGTct  
cgagctggcgaattcc  
>CD\_NM\_001627.2:1863  
CgCtGcgagtctGGtatGCAGCCAGCCATTCAATGGACAATTCAAGAGATTGTCCATTGAATGGCTGGCTTTTTTTGTct  
cgagctggcgaattcc  
>CD\_NM\_001627.2:1193  
CgCtGcgagtctGGtatGAACCTGCTCGGTGACATATTATTTCAAGAGAATAATATGTCACCGAGCAGGTGTTTTTGTct  
cgagctggcgaattcc  
>CD\_NM\_001627.2:780  
CgCtGcgagtctGGtatGAACGATGTACCAGAATACAAAGTTCAAGAGACTTTGTATTCTGGTACATCGTCTTTTTTGTct  
cgagctggcgaattcc  
>CD\_NM\_001627.2:945  
CgCtGcgagtctGGtatGCAACCTGAAATTGTAAGCAAAGTTCAAGAGACTTTGCTTACAATTTCAAGTTTTTTTTTGTct  
cgagctggcgaattcc  
>CD\_NM\_001627.2:900  
CgCtGcgagtctGGtatGATGTTTGGAGGCACCTACAATAGTTCAAGAGACTATTGTAGGTGCCTCAAACACTTTTTTGTct  
cgagctggcgaattcc  
>CD\_NM\_001627.2:1248  
CgCtGcgagtctGGtatGAAGGCAGTATTTGATATTTACTTTCAAGAGAAGTAAATATCAAATACTGCCTGTTTTTGTct  
cgagctggcgaattcc  
>CD\_NM\_001627.2:745  
CgCtGcgagtctGGtatGACTTCAGATCCTCTACAAAGAATTCAAGAGATTCTTTGTAGAGGATCTGAAGTTTTTGTct  
cgagctggcgaattcc  
>CD\_NM\_013993:820  
CgCtGcgagtctGGtatGCACCACAGCTTCTCCAGTGGCTTTCAAGAGAAGCCACTGGAGAAGCTGTGGTTTTTTTTGTct  
cgagctggcgaattcc  
>CD\_NM\_013993:2321  
CgCtGcgagtctGGtatGCGCGCTATCTGGCCCACTCAATTCAAGAGATTGAGTGTGGCCAGATAGCGCATTTTTTTGTct  
cgagctggcgaattcc  
>CD\_NM\_013993:889

CgCctGcgagtctGGtatGCTGCAGGTCCACTGTAACAACATTCAAGAGATGTTGTTACAGTGGACCTGCATTTTTTTGct  
cgagctggcgaattcc  
>CD\_NM\_013993:1934  
CgCctGcgagtctGGtatGACCCCTCAAGATCTGGTTAGTCTTTCAAGAGAAGACTAACCAGATCTTGAGGGCTTTTTTGct  
cgagctggcgaattcc  
>CD\_NM\_013994:889  
CgCctGcgagtctGGtatGCTGCAGGTCCACTGTAACAACATTCAAGAGATGTTGTTACAGTGGACCTGCATTTTTTTGct  
cgagctggcgaattcc  
>CD\_NM\_013994:1934  
CgCctGcgagtctGGtatGACCCCTCAAGATCTGGTTAGTCTTTCAAGAGAAGACTAACCAGATCTTGAGGGCTTTTTTGct  
cgagctggcgaattcc  
>CD\_NM\_013994:820  
CgCctGcgagtctGGtatGCACCACAGCTTCTCCAGTGGCTTTCAAGAGAAGCCACTGGAGAAGCTGTGGTTTTTTTTGct  
cgagctggcgaattcc  
>CD\_NM\_013994:784  
CgCctGcgagtctGGtatGAGGGTCTGGCCAGGCTATGACTTTCAAGAGAAGTCATAGCCTGGCCAGACCCGTTTTTTGct  
cgagctggcgaattcc  
>CD\_NM\_013994:1441  
CgCctGcgagtctGGtatGAGGGACACTATCCTCATCAACATTCAAGAGATGTTGATGAGGATAGTGTCCCTTTTTTGct  
cgagctggcgaattcc  
>CD\_NM\_013994.2:602  
CgCctGcgagtctGGtatGAAGGGATGGACTCCTGTCTTACTTCAAGAGAGTAAGACAGGAGTCCATCCCTTTTTTTGct  
cgagctggcgaattcc  
>CD\_NM\_013994.2:479  
CgCctGcgagtctGGtatGACCTGAGGGAGTGGTGCTGAAGTTCAAGAGACTTCAGCACCCTCCCTCAGGGTTTTTTGct  
cgagctggcgaattcc  
>CD\_NM\_013994.2:2263  
CgCctGcgagtctGGtatGAGCCCACCATCAGCTACCCAATTTCAAGAGAATTGGGTAGCTGATGGTGGGCCTTTTTTGct  
cgagctggcgaattcc  
>CD\_NM\_013994.2:266  
CgCctGcgagtctGGtatGAGCAGGGTCGGTGTTCCTCAAGTTCAAGAGACTTGGGAAACACCGACCTGCGTTTTTTGct  
cgagctggcgaattcc  
>CD\_NM\_013994.2:884  
CgCctGcgagtctGGtatGAGCTATGCAGGTCCACTGTAACTTCAAGAGAGTTACAGTGGACCTGCATAGCCTTTTTTGct  
cgagctggcgaattcc  
>CD\_NM\_013994.2:2123  
CgCctGcgagtctGGtatGAGGCGTGTGTGTGCAGGACGACTTCAAGAGAGTCGTCTGCACACACACGCCCTTTTTTTGct  
cgagctggcgaattcc  
>CD\_NM\_013994.2:2201  
CgCctGcgagtctGGtatGCGCCCACCAGCTGGAGGACAAGTTCAAGAGACTTGTCTCCAGCTGGTGGGCATTTTTTGct  
cgagctggcgaattcc  
>CD\_NM\_013994.2:1105  
CgCctGcgagtctGGtatGACTGGTTACTCTTCAGCGAAATTTCAAGAGAATTTGCTGAAGAGTAACCAGTTTTTTGct  
cgagctggcgaattcc  
>CD\_NM\_013994.2:833  
CgCctGcgagtctGGtatGAAGTGGCTATGTGGAGATGGAGTTCAAGAGACTCCATCTCCACATAGCCACTGTTTTTTGct  
cgagctggcgaattcc  
>CD\_NM\_013994.2:2054  
CgCctGcgagtctGGtatGAAGGAATGATTTCTGAAAGAGTTCAAGAGACTCTTTCAGGAAATCATTCCTGTTTTTTGct  
cgagctggcgaattcc  
>CD\_NM\_013994.2:563  
CgCctGcgagtctGGtatGAAGCGTCTGTCTGCGGGTAGAGTTCAAGAGACTCTACCCGCAGACAGACGCTTTTTTTGct  
cgagctggcgaattcc  
>CD\_NM\_013994.2:1550

CgCctGcgagtctGGtatGATCTGCGTTGCTGCTCTCCAATTTCAAGAGAATTGGAGAGCAGCAACGCAGAGTTTTTGct  
cgagctggcgaattcc  
>CD\_NM\_013994.2:2032  
CgCctGcgagtctGGtatGCTGCCAGCTTCTCCTTGTCTCTTCAAGAGAGAGAACAAGGAGAAGCTGGCATTTTTTTGct  
cgagctggcgaattcc  
>CD\_NM\_013994.2:1367  
CgCctGcgagtctGGtatGATGGCGCAGGCTCCTCAGCAAGTTCAAGAGACTTGCTGAGGAGCCTGCGCCAGTTTTTGct  
cgagctggcgaattcc  
>CD\_NM\_013994.2:653  
CgCctGcgagtctGGtatGCTCTGAGGCCGTGTACCTCAACTTCAAGAGAGTTGAGGTACACGGCCTCAGATTTTTTGct  
cgagctggcgaattcc  
>CD\_NM\_013994.2:1934  
CgCctGcgagtctGGtatGACCTCAAGATCTGGTTAGTCTTTTTCAAGAGAAAGACTAACCAGATCTTGAGGGTTTTTGct  
cgagctggcgaattcc  
>CD\_NM\_013994.2:889  
CgCctGcgagtctGGtatGCGCAGGTCCACTGTAACAACATTTCAAGAGAATGTTGTTACAGTGGACCTGCATTTTTTGct  
cgagctggcgaattcc  
>CD\_NM\_013994.2:1133  
CgCctGcgagtctGGtatGAATCTCTGATGTGGTGAACAATTTCAAGAGAATTGTTACCACATCAGAGATTTTTTGct  
cgagctggcgaattcc  
>CD\_NM\_013994.2:2488  
CgCctGcgagtctGGtatGCGGCCCTGGGAGTGCATCCTCATTTCAAGAGAATGAGGATGCACTCCCAGGCCATTTTTTGct  
cgagctggcgaattcc  
>CD\_NM\_013994.2:1441  
CgCctGcgagtctGGtatGAGGACACTATCCTCATCAACAATTTCAAGAGATTGTTGATGAGGATAGTGTCCCTTTTTTGct  
cgagctggcgaattcc  
>CD\_NM\_013994.2:1580  
CgCctGcgagtctGGtatGACGCCTCCTTCTGGCCACTTACTTCAAGAGAGTAAGTGGCCAGAAGGAGGCGGTTTTTGct  
cgagctggcgaattcc  
>CD\_NM\_013994.2:1865  
CgCctGcgagtctGGtatGCCGACTCCGCTTCAAGGAGAAGTTCAAGAGACTTCTCCTTGAAGCGGAGTCGATTTTTTGct  
cgagctggcgaattcc  
>CD\_NM\_013994.2:561  
CgCctGcgagtctGGtatGCTGAGCGTCTGTCTGCGGGTAGTTCAAGAGACTACCCGCAGACAGACGCTCATTTTTTGct  
cgagctggcgaattcc  
>CD\_NM\_013994.2:2724  
CgCctGcgagtctGGtatGCGCCGGGAGTCTGAGCAGCGACTTCAAGAGAGTCGCTGCTCAGACTCCCAGGCTTTTTTGct  
cgagctggcgaattcc  
>CD\_NM\_012484:465  
CgCctGcgagtctGGtatGAACCAGGACTAATGAACTACTATTCAAGAGATAGTAGTTCATTAGTCTTGGTCTTTTTTGct  
cgagctggcgaattcc  
>CD\_NM\_012484:1217  
CgCctGcgagtctGGtatGCAGCTGAAAGGCTGGTCAAGCATTCAAGAGATGCTTGACCAGCCTTTCAGCTTTTTTTTGct  
cgagctggcgaattcc  
>CD\_NM\_012484:1922  
CgCctGcgagtctGGtatGCGGGTCATCAGAAATTTGAAACATTCAAGAGATGTTTCAAATTTCTGATGACCATTTTTTGct  
cgagctggcgaattcc  
>CD\_NM\_012484:850  
CgCctGcgagtctGGtatGCAGCAGTCTCTTGGAGAGAATATTCAAGAGATATTCCTCAAGAGACTGCTTTTTTTTGct  
cgagctggcgaattcc  
>CD\_NM\_012484:216  
CgCctGcgagtctGGtatGCACCTTGCTGCTTTCAGCTAGATTCAAGAGATCTAGCTGAAGCAGGCAAGGTATTTTTTGct  
cgagctggcgaattcc  
>CD\_NM\_012484.1:1175

CgCctGcgagtctGGtatGCACACTGGATGAGCTTGATAAAATTC AAGAGATTTATCAAGCTCATCCAGTGTTTTTTTGct  
cgagctggcgaattcc  
>CD\_NM\_012484.1:1874  
CgCctGcgagtctGGtatGCGCTCAGGAACAGCTAAATAAATTC AAGAGATTTATTTAGCTGTTCTTGAGCTTTTTTTTGct  
cgagctggcgaattcc  
>CD\_NM\_012484.1:1579  
CgCctGcgagtctGGtatGCGCAGACCAAGTCAGCACTAAATTC AAGAGATTTAGTGCTGACTTGGTCTGCATTTTTTGct  
cgagctggcgaattcc  
>CD\_NM\_012484.1:1179  
CgCctGcgagtctGGtatGATGGATGAGCTTGATAAAATTA CTTC AAGAGAGTAATTTATCAAGCTCATCCAGTTTTTTTGct  
cgagctggcgaattcc  
>CD\_NM\_012484.1:347  
CgCctGcgagtctGGtatGAATCCAGGATCTGGAAACTGAGTTCA AGAGACTCAGTTTCCAGATCCTGGATCTTTTTTGct  
cgagctggcgaattcc  
>CD\_NM\_012484.1:2079  
CgCctGcgagtctGGtatGCTCAAACACTTTGATCCTTCAATTCA AGAGATTGAAGGATCAAAGTGTTGATTTTTTTTGct  
cgagctggcgaattcc  
>CD\_NM\_012484.1:1505  
CgCctGcgagtctGGtatGCGCAGAGGATGTTGAGCATCAGTTCA AGAGACTGATGCTGAACATCCTCTGCATTTTTTTTGct  
cgagctggcgaattcc  
>CD\_NM\_012484.1:1955  
CgCctGcgagtctGGtatGCGTTGTGAAGTTGAAAGATGAATTC AAGAGATTCATCTTTCAACTTCACAACATTTTTTTTGct  
cgagctggcgaattcc  
>CD\_NM\_012484.1:1401  
CgCctGcgagtctGGtatGCCTGCTCAATTTGAAAGCTATATTC AAGAGATATAGCTTTCAAATGAGCAGTTTTTTTGct  
cgagctggcgaattcc  
>CD\_NM\_012484.1:1430  
CgCctGcgagtctGGtatGCACAGCCAGTGAGATAGAAGATTTCA AGAGAATCTTCTATCTCACTGGCTGTTTTTTTGct  
cgagctggcgaattcc  
>CD\_NM\_012484.1:935  
CgCctGcgagtctGGtatGCGAAGACCATGTCAACAGGAATTTCA AGAGAATTCCTGTTGACATGGTCTTCTTTTTTTTGct  
cgagctggcgaattcc  
>CD\_NM\_012484.1:1539  
CgCctGcgagtctGGtatGAAGAGCTCAAATCAAGAATATGTTCA AGAGACATATTCCTTGATTTGAGCTCTTTTTTTTGct  
cgagctggcgaattcc  
>CD\_NM\_012484.1:1091  
CgCctGcgagtctGGtatGCTCTTCGAGTCTTCATCAGAAGTTCA AGAGACTTCTGATGAAGACTCGAAGATTTTTTTTGct  
cgagctggcgaattcc  
>CD\_NM\_012484.1:414  
CgCctGcgagtctGGtatGCCATCTCTCTCTGCAAATAATGTTCA AGAGACATTAATTTGCAGAGAGAGATGTTTTTTTGct  
cgagctggcgaattcc  
>CD\_NM\_012484.1:1146  
CgCctGcgagtctGGtatGCAGAACTGTTTGAGGAAGAATTTCA AGAGAATTCCTCCTCAAACAGATCTTTTTTTTGct  
cgagctggcgaattcc  
>CD\_NM\_012484.1:1058  
CgCctGcgagtctGGtatGCATTGATTCACCTCTGCAACAATTC AAGAGATTGTTGCAGAAGTGAATCAATTTTTTTTGct  
cgagctggcgaattcc  
>CD\_NM\_012484.1:1568  
CgCctGcgagtctGGtatGACTTCTAGATCTGCAGACCAAGTTCA AGAGACTTGGTCTGCAGATCTAGAAGCTTTTTTTTGct  
cgagctggcgaattcc  
>CD\_NM\_012484.1:2060  
CgCctGcgagtctGGtatGCTTGAATAAAGTTCTAGGTATCTTCA AGAGAGATACCTAGAACTTTATTC AATTTTTTTTGct  
cgagctggcgaattcc  
>CD\_NM\_012484.1:2181

CgCctGcgagtctGGtatGACTATGGAGTGTCAAGAATCATTTCAAGAGAATGATTCTTGACACTCCATAGGTTTTTgct  
cgagctggcgaattcc  
>CD\_NM\_012484.1:2006  
CgCctGcgagtctGGtatGCCTCCGCTGTCAGCTTGCTAAATTCAGAGATTTAGCAAGCTGACAGCGGAGTTTTTgct  
cgagctggcgaattcc  
>CD\_NM\_012484.1:896  
CgCctGcgagtctGGtatGCGATCTAAATGTGAAATGTCAGTTCAAGAGACTGACATTTACATTTAGATCTTTTTTgct  
cgagctggcgaattcc  
>CD\_NM\_012484.1:133  
CgCctGcgagtctGGtatGCAGGACCAGTATCCTTTTCAGAATTCAGAGATTTCTGAAAGGATACTGGTCCTTTTTgct  
cgagctggcgaattcc  
>CD\_NM\_012484.1:1400  
CgCctGcgagtctGGtatGCACTGCTCAATTTGAAAGCTATTTCAAGAGAATAGCTTTCAAATTTGAGCAGTATTTTTgct  
cgagctggcgaattcc  
>CD\_NM\_012484.1:759  
CgCctGcgagtctGGtatGCGTGCTTCAGATCAAGTGGAAATTCAGAGATTTCCACTTGATCTGAAGCACATTTTTgct  
cgagctggcgaattcc  
>CD\_NM\_012484.1:2174  
CgCctGcgagtctGGtatGACGAGCTCCTATGGAGTGTCAATTCAGAGATTTGACACTCCATAGGAGCTCGTTTTTgct  
cgagctggcgaattcc  
>CD\_NM\_012484.1:1217  
CgCctGcgagtctGGtatGCGCTGAAAGGCTGGTCAAGCAATTCAGAGATTTGCTTGACCAGCCTTTTCAGCTTTTTTgct  
cgagctggcgaattcc  
>CD\_NM\_012484.1:1230  
CgCctGcgagtctGGtatGATCAAGCAATTTGGAAGAGGAAGTTCAAGAGACTTCCTCTTCCAATTTGCTTGACTTTTTTgct  
cgagctggcgaattcc  
>CD\_NM\_012484.1:788  
CgCctGcgagtctGGtatGACTAGATATGCCCAGTTAGAATTCAGAGATTTCTAACTGGGCAATATCTAGCTTTTTTgct  
cgagctggcgaattcc  
>CD\_NM\_023068:1621  
CgCctGcgagtctGGtatGACCCGCTTCTCCTGGTACCTGATTTCAAGAGATCAGGTACCAGGAGAAGCGGGCTTTTTTgct  
cgagctggcgaattcc  
>CD\_NM\_023068:2834  
CgCctGcgagtctGGtatGCCCGCTTTGCAGCCATAACTTTTTCAAGAGAAAAGTTATGGCTGCAAAGCGGATTTTTTgct  
cgagctggcgaattcc  
>CD\_NM\_023068:1474  
CgCctGcgagtctGGtatGCCAGCCACCAACTCCCTTGAATTCAGAGATTTCCAAGGGAGTTGGTGGCTGATTTTTTgct  
cgagctggcgaattcc  
>CD\_NM\_023068:1505  
CgCctGcgagtctGGtatGACACCCTGGACTTCCATGCCAATTCAGAGATTTGGCATGGAAGTCCAGGGTGGTTTTTgct  
cgagctggcgaattcc  
>CD\_NM\_023068:1205  
CgCctGcgagtctGGtatGACCCTGTCAGCGTGGTAGTCAATTCAGAGATTTGACTACCACGCTGACAGGGCTTTTTTgct  
cgagctggcgaattcc  
>CD\_NM\_023068:318  
CgCctGcgagtctGGtatGACCCGAGGACTCTGGTTCCTACTTCAAGAGAGTAGGAACCAGAGTCTTCGGCTTTTTTgct  
cgagctggcgaattcc  
>CD\_NM\_023068.2:1205  
CgCctGcgagtctGGtatGACCTGTCAGCGTGGTAGTCAACTTCAGAGAGTTGACTACCACGCTGACAGGGTTTTTgct  
cgagctggcgaattcc  
>CD\_NM\_023068.2:2772  
CgCctGcgagtctGGtatGAGGACCTCATATCGTTGGTATCTTCAAGAGAGATACCAACGATATGAGGTCCTTTTTTgct  
cgagctggcgaattcc  
>CD\_NM\_023068.2:1895

CgCctGcgagtctGGtatGAAGGCTGCAGCTGCTCCACAAGTTCAAGAGACTTGTGGAGCAGCTGCAGCCTGTTTTTGct  
cgagctggcgaattcc  
>CD\_NM\_023068.2:1576  
CgCctGcgagtctGGtatGAAGTGACACTGAGCTGCAGAAGTTCAAGAGACTTCTGCAGCTCAGTGTCACTGTTTTTGct  
cgagctggcgaattcc  
>CD\_NM\_023068.2:539  
CgCctGcgagtctGGtatGCGCTCGCTCTGTCACCTTCAACTTCAAGAGAGTTGAAGGTGACAGAGCGAGCATTTTTTGct  
cgagctggcgaattcc  
>CD\_NM\_023068.2:3143  
CgCctGcgagtctGGtatGAACACTGCGTCTGGAGATCCACTTCAAGAGAGTGGATCTCCAGACGCAGTGTTTTTTGct  
cgagctggcgaattcc  
>CD\_NM\_023068.2:1474  
CgCctGcgagtctGGtatGAAGCCACCAACTCCCTTGGAAATTCAAGAGATTTCCAAGGGAGTTGGTGGCTGTTTTTGct  
cgagctggcgaattcc  
>CD\_NM\_023068.2:366  
CgCctGcgagtctGGtatGCACCGCTGGTCAGATGTGAAAGTTCAAGAGACTTTCACATCTGACCAGCGGTTTTTTTGct  
cgagctggcgaattcc  
>CD\_NM\_023068.2:1505  
CgCctGcgagtctGGtatGAACCTGGACTTCCATGCCAATTTCAAGAGAATTGGCATGGAAGTCCAGGGTGTTTTTTGct  
cgagctggcgaattcc  
>CD\_NM\_023068.2:1621  
CgCctGcgagtctGGtatGACCGCTTCTCCTGGTACCTGAATTTCAAGAGATTCAGGTACCAGGAGAAGCGGGTTTTTTTGct  
cgagctggcgaattcc  
>CD\_NM\_023068.2:995  
CgCctGcgagtctGGtatGCGCAGGTCCCATCCTGGGAACTTCAAGAGAGTTCTCCAGGATGGGACCTGCTTTTTTTTGct  
cgagctggcgaattcc  
>CD\_NM\_023068.2:2564  
CgCctGcgagtctGGtatGAGCCAACCTCCCTGAAGTTAGAGTTCAAGAGACTCTAACTTCCAGGGAGTTGGCCTTTTTTGct  
cgagctggcgaattcc  
>CD\_NM\_023068.2:3248  
CgCctGcgagtctGGtatGAGCTCAAGCTGTGAATGTGCAGTTCAAGAGACTGCACATTCACAGCTTGAGCGTTTTTTTGct  
cgagctggcgaattcc  
>CD\_NM\_023068.2:4074  
CgCctGcgagtctGGtatGACCAGATCCATGGCTGTGATACTTCAAGAGAGTATCACAGCCATGGATCTGGCTTTTTTTTGct  
cgagctggcgaattcc  
>CD\_NM\_023068.2:541  
CgCctGcgagtctGGtatGATCGCTCTGTCACCTTCAACAGTTCAAGAGACTGTTGAAGGTGACAGAGCGAGTTTTTTTGct  
cgagctggcgaattcc  
>CD\_NM\_023068.2:2960  
CgCctGcgagtctGGtatGAACACTCACTACCCTGATGGACTTCAAGAGAGTCCATCAGGGTAGTGAGTGTTTTTTTTGct  
cgagctggcgaattcc  
>CD\_NM\_023068.2:4781  
CgCctGcgagtctGGtatGCGCCCTGAGGGTGGACATCGAGTTCAAGAGACTCGATGTCCACCCTCAGGGCATTTTTTTGct  
cgagctggcgaattcc  
>CD\_NM\_023068.2:1145  
CgCctGcgagtctGGtatGAGCTGATACTGGCTTCTACTTCTTCAAGAGAGAAGTAGAAGCCAGTATCAGCCTTTTTTTGct  
cgagctggcgaattcc  
>CD\_NM\_023068.2:3868  
CgCctGcgagtctGGtatGAACTCTATACTTGGTACCACAATTTCAAGAGATTGTGGTACCAAGTATAGAGTGTTTTTTTGct  
cgagctggcgaattcc  
>CD\_NM\_023068.2:4174  
CgCctGcgagtctGGtatGCCACAGCTTGGCATCAGGGACTTCAAGAGAGTCCCTGATGCCAAGCTGTGGATTTTTTTGct  
cgagctggcgaattcc  
>CD\_NM\_023068.2:474

CgCctGcgagtctGGtatGCACTGCTCCACTCCCTACGTATTTCAAGAGAATACGTAGGGAGTGGAGCAGTTTTTTTGct  
cgagctggcgaattcc  
>CD\_NM\_023068.2:1553  
CgCctGcgagtctGGtatGCGCCGAGGTGGTGAAGGACAGTTCAAGAGACTGTCCCTCCACCACCTCGGCTTTTTTTGct  
cgagctggcgaattcc  
>CD\_NM\_023068.2:1066  
CgCctGcgagtctGGtatGCCCGCTACAGCTGGTACAAGAATTCAAGAGATTCTTGTACCAGCTGTAGCGGATTTTTTGct  
cgagctggcgaattcc  
>CD\_NM\_023068.2:652  
CgCctGcgagtctGGtatGCGCTCTCCGTGGCCAATCACAGTTCAAGAGACTGTGATTGGCCACGGAGAGCTTTTTTTGct  
cgagctggcgaattcc  
>CD\_NM\_023068.2:2009  
CgCctGcgagtctGGtatGATTGCTGCGTGTGGAGATTCACCTTCAAGAGAGTGAATCTCCACACGCAGCAAGTTTTTTGct  
cgagctggcgaattcc  
>CD\_NM\_023068.2:322  
CgCctGcgagtctGGtatGCGGACTCTGGTTCCTACAACTTTTCAAGAGAAAGTTGTAGGAACCAGAGTCCTTTTTTTGct  
cgagctggcgaattcc  
>CD\_NM\_023068.2:2069  
CgCctGcgagtctGGtatGAGCCAGCAATGCCCTGGGCAACTTCAAGAGAGTTGCCAGGGCATTGCTGGCCTTTTTTTGct  
cgagctggcgaattcc  
>CD\_NM\_003830:767  
CgCctGcgagtctGGtatGCCAACCTCACCTGTCAGATGATTCAAGAGATCATCTGACAGGTGAGGTTGGTTTTTTTGct  
cgagctggcgaattcc  
>CD\_NM\_003830:1187  
CgCctGcgagtctGGtatGATGCACTGCAGATGCTCCTTTCTTCAAGAGAGAAAGGAGCATCTGCAGTGCAGTTTTTTGct  
cgagctggcgaattcc  
>CD\_NM\_003830:1265  
CgCctGcgagtctGGtatGCACAGCAGCCAGGGCTCATTCATTCAAGAGATGAATGAGCCCTGGCTGCTGTTTTTTTGct  
cgagctggcgaattcc  
>CD\_NM\_003830:1271  
CgCctGcgagtctGGtatGCGCCAGGGCTCATTCAGGTCATTCAAGAGATGACCTTGAATGAGCCCTGGCTTTTTTTGct  
cgagctggcgaattcc  
>CD\_NM\_003830:1095  
CgCctGcgagtctGGtatGCCCCGCTGGGCTTCCTGCAAATTTCAAGAGAATTTGCAGGAAGCCCAGCGGGTTTTTTTGct  
cgagctggcgaattcc  
>CD\_NM\_003830:554  
CgCctGcgagtctGGtatGAAGGTGACAGCCCTGATAGAGATTCAAGAGATCTCTATCAGGGCTGTCACCTTTTTTTGct  
cgagctggcgaattcc  
>CD\_NM\_003830.1:930  
CgCctGcgagtctGGtatGAGCTCTGCGGCTGCTCTGTGATTTCAAGAGAATCACAGAGCAGCCGCAGAGCCTTTTTTTGct  
cgagctggcgaattcc  
>CD\_NM\_003830.1:348  
CgCctGcgagtctGGtatGAGCTGAGGTTGTGGCCACAACTTCAAGAGAGTTTGTGGCCACAACCTCAGCGTTTTTTGct  
cgagctggcgaattcc  
>CD\_NM\_003830.1:1497  
CgCctGcgagtctGGtatGATGTCTGTGCCTCATCTTCTTTTTTCAAGAGAAAAGAAGATGAGGCACAGACAGTTTTTTGct  
cgagctggcgaattcc  
>CD\_NM\_003830.1:848  
CgCctGcgagtctGGtatGAACAGACCATCACCATCTTCAGTTCAAGAGACTGAAGATGGTGATGGTCTGTGTTTTTTGct  
cgagctggcgaattcc  
>CD\_NM\_003830.1:303  
CgCctGcgagtctGGtatGACCACTCTACGTCTACTGGTTCTTCAAGAGAGAACCAGTAGACGTAGAGTGGGTTTTTTGct  
cgagctggcgaattcc  
>CD\_NM\_003830.1:852



CgCtGcgagtctGGtatGAACCATCACCATCTTCAGGAACCTCAAGAGAGTTCCTGAAGATGGTGATGGTCTTTTTGct  
cgagctggcgaattcc  
>CD\_NM\_003830.1:337  
CgCtGcgagtctGGtatGCTCCCATACTACGCTGAGGTTGTTCAAGAGACAACCTCAGCGTAGTATGGGATTTTTGct  
cgagctggcgaattcc  
>CD\_NM\_003830.1:350  
CgCtGcgagtctGGtatGATGAGGTTGTGGCCACAAACAATTCAAGAGATTGTTTGTGGCCACAACCTCAGTTTTGct  
cgagctggcgaattcc  
>CD\_NM\_003830.1:446  
CgCtGcgagtctGGtatGACCTGAGCATCGGAGATGCCAGTTCAGAGACTGGCATCTCCGATGCTCAGGGTTTTGct  
cgagctggcgaattcc  
>CD\_NM\_003830.1:1128  
CgCtGcgagtctGGtatGATCAGTTTACTCCCTCCCACAGTTCAGAGACTGTGGGAGGGAGTAACTGAGTTTTGct  
cgagctggcgaattcc  
>CD\_NM\_003830.1:1095  
CgCtGcgagtctGGtatGACCGCTGGGCTTCCTGCAAATTTCAAGAGAAATTTGCAGGAAGCCCAGCGGGTTTTGct  
cgagctggcgaattcc  
>CD\_NM\_003830.1:1045  
CgCtGcgagtctGGtatGAGTCGAGTAAGGTCTGCAGAAGTTCAGAGACTTCTGCAGACCTTACTCGACGTTTTGct  
cgagctggcgaattcc  
>CD\_NM\_003830.1:1118  
CgCtGcgagtctGGtatGCTCTGAATCTCTCAGTTTACTCTTCAAGAGAGAGTAACTGAGAGATTCAGAATTTTTGct  
cgagctggcgaattcc  
>CD\_NM\_003830.1:846  
CgCtGcgagtctGGtatGCCACAGACCATCACCATCTTCTTCAAGAGAGAAGATGGTGATGGTCTGTGGATTTTTGct  
cgagctggcgaattcc  
>CD\_NM\_003830.1:1467  
CgCtGcgagtctGGtatGCGGTGCTGGTGTTCATGGCCCTGTTCAAGAGACAGGGCCATGACACCAGCACCATTTTTGct  
cgagctggcgaattcc  
>CD\_NM\_003830.1:1398  
CgCtGcgagtctGGtatGAAGCGGCTCTGTCTGCTGTTCAAGAGACAGCAGCAGGACAGAGCCGCTTTTTGct  
cgagctggcgaattcc  
>CD\_NM\_003830.1:1094  
CgCtGcgagtctGGtatGCCCCGCTGGGCTTCCTGCAAATTTCAAGAGAATTTGCAGGAAGCCCAGCGGGTTTTGct  
cgagctggcgaattcc  
>CD\_NM\_003830.1:795  
CgCtGcgagtctGGtatGCGGAGCTCAGGTGACCACGGAGTTCAGAGACTCCGTGGTACCTGAGCTCCTTTTTGct  
cgagctggcgaattcc  
>CD\_NM\_003830.1:1764  
CgCtGcgagtctGGtatGAACGGAGTACTCGGAGATCAAGTTCAGAGACTTGATCTCCGAGTACTCCGTGTTTTGct  
cgagctggcgaattcc  
>CD\_NM\_003830.1:769  
CgCtGcgagtctGGtatGCACCTCACCTGTCAGATGAACTTCAGAGAGTTTCATCTGACAGGTGAGGTTTTTTGct  
cgagctggcgaattcc  
>CD\_NM\_003830.1:193  
CgCtGcgagtctGGtatGCAGCCAGTGTACGAGCTGCAAGTTCAGAGACTTGCAGCTCGTACACTGGCTTTTTTTGct  
cgagctggcgaattcc  
>CD\_NM\_003830.1:1033  
CgCtGcgagtctGGtatGCTCTTGAGCTTCGTGAGTAATTCAGAGATTACTCGACGAAGCTCCAAGATTTTTTTGct  
cgagctggcgaattcc  
>CD\_NM\_003830.1:1020  
CgCtGcgagtctGGtatGATCCAATACCGGGATCTTGAGTTCAGAGACTCCAAGATCCCAGTATTGGAGTTTTTTGct  
cgagctggcgaattcc  
>CD\_NM\_003830.1:500

CgCtGcgagtctGGtatGCGGAGAGAGGAAGGGATGTAAATTC AAGAGATTTACATCCCTTCTCTCCATTTTTTGct  
cgagctggcgaattcc  
>CD\_NM\_003830.1:254  
CgCtGcgagtctGGtatGCTGTGCCCTGCTCCTTCTCTTATTCAAGAGATAAGAGAAGGAGCAGGGCACAATTTTTTGct  
cgagctggcgaattcc  
>CD\_NM\_003830.1:195  
CgCtGcgagtctGGtatGACCAGTG TACGAGCTGCAAGTGTTCAAGAGACACTTGCAGCTCGTACACTGGCTTTTTTGct  
cgagctggcgaattcc  
>CD\_NM\_003830.1:1086  
CgCtGcgagtctGGtatGAGCTCAGCACCCGCTGGGCTTCTTCAAGAGAGAAGCCAGCGGGTGCTGAGCGTTTTTGct  
cgagctggcgaattcc  
>CD\_NM\_024003:354  
CgCtGcgagtctGGtatGCACCGCTGCTTTGCCAGCAATATTCAAGAGATATTGCTGGCAAAGCAGCGGTATTTTTTGct  
cgagctggcgaattcc  
>CD\_NM\_024003:1591  
CgCtGcgagtctGGtatGACCGCAGCACAATCGAGAAGAATTCAAGAGATCTTCTCGATTGTGCTGCGGGTTTTTGct  
cgagctggcgaattcc  
>CD\_NM\_024003:2081  
CgCtGcgagtctGGtatGCAGGGTTACTGCCATAAACAAATTC AAGAGATTTGTTTATGGCAGTAACCCTATTTTTTGct  
cgagctggcgaattcc  
>CD\_NM\_024003:2082  
CgCtGcgagtctGGtatGCGGGTTACTGCCATAAACAAATTTCAAGAGAATTTGTTTATGGCAGTAACCCTTTTTTGct  
cgagctggcgaattcc  
>CD\_NM\_024003:2594  
CgCtGcgagtctGGtatGAAGGAAGCACAGCAAGAGACATTTCAAGAGAATGTCTCTTGCTGTGCTTCTCTTTTTTGct  
cgagctggcgaattcc  
>CD\_NM\_024003:3464  
CgCtGcgagtctGGtatGAGGCAAATACTCAGTGAAGGATTTCAAGAGAATCCTTCACTGAGTATTTGCCGTTTTTGct  
cgagctggcgaattcc  
>CD\_NM\_024003:1251  
CgCtGcgagtctGGtatGAGGCTCTTGCTGGCCAATGCCTTTCAAGAGAAGGCATTGGCCAGCAAGAGCCTTTTTGct  
cgagctggcgaattcc  
>CD\_NM\_024003:588  
CgCtGcgagtctGGtatGCACGGCAACCTCTACTTTGCCATTC AAGAGATGGCAAAGTAGAGGTTGCCGTTTTTTTTGct  
cgagctggcgaattcc  
>CD\_NM\_024003:3055  
CgCtGcgagtctGGtatGCGGCCTTGCTGCTGGGATCTCAGATTCAAGAGATCTGAGATCCAGACAAGGCCATTTTTTGct  
cgagctggcgaattcc  
>CD\_NM\_000425.2:3429  
CgCtGcgagtctGGtatGCGCTCATCCTCTGCTTCATCAATTC AAGAGATTGATGAAGCAGAGGATGAGCATTTTTTGct  
cgagctggcgaattcc  
>CD\_NM\_000425.2:3211  
CgCtGcgagtctGGtatGACCACAGTATGTCAGCTACAAC TCAAGAGAGTTGTAGCTGACATACTGTGGCTTTTTTGct  
cgagctggcgaattcc  
>CD\_NM\_000425.2:2080  
CgCtGcgagtctGGtatGCAGGGTTACTGCCATAAACAAATTC AAGAGATTTGTTTATGGCAGTAACCCTATTTTTTGct  
cgagctggcgaattcc  
>CD\_NM\_000425.2:1543  
CgCtGcgagtctGGtatGAATGGCTAACCTGAAGGTTAAATTC AAGAGATTTAACCTTCAGGTTAGCCATTTTTTGct  
cgagctggcgaattcc  
>CD\_NM\_000425.2:508  
CgCtGcgagtctGGtatGCGCAGAGCCTCTCCGGATCTACTTCAAGAGAGTAGATCCGGAGAGGCTCTGCATTTTTTGct  
cgagctggcgaattcc  
>CD\_NM\_000425.2:229

CgCctGcgagtctGGtatGAAGGGATGGTGTCCACTTCAAATTC AAGAGATTTGAAGTGGACACCATCCCTCTTTTTTGct  
cgagctggcgaattcc  
>CD\_NM\_000425.2:288  
CgCctGcgagtctGGtatGACCACTCTGGCTCCTTCACCATTTCAAGAGAATGGTGAAGGAGCCAGAGTGGGTTTTTGct  
cgagctggcgaattcc  
>CD\_NM\_000425.2:3658  
CgCctGcgagtctGGtatGAACGCTGGATGTTCACTTCAACTTCAAGAGAGTTGAACTGAACATCCACGCTGTTTTTGct  
cgagctggcgaattcc  
>CD\_NM\_000425.2:2863  
CgCctGcgagtctGGtatGAACCGGTACGTGCTCTCCTACTTCAAGAGAGTAGGAGAGCACGTAGCCGGTGTTTTTGct  
cgagctggcgaattcc  
>CD\_NM\_000425.2:475  
CgCctGcgagtctGGtatGATCAGTGGTCTGCCTTGCAACTTCAAGAGAGTTGCAAGGCAGAACCCTGACTTTTTTGct  
cgagctggcgaattcc  
>CD\_NM\_000425.2:1345  
CgCctGcgagtctGGtatGAACTGCCTACCTTCTGTGCAAGTTCAAGAGACTTGCACAGAAGGTAGGCAGTGTTTTTTGct  
cgagctggcgaattcc  
>CD\_NM\_000425.2:1916  
CgCctGcgagtctGGtatGATGTCTGGAGTCTGCAGAAGTTCAAGAGACTTCTGCAGGACTCCAGGACACTTTTTTGct  
cgagctggcgaattcc  
>CD\_NM\_000425.2:235  
CgCctGcgagtctGGtatGCGGTGTCCACTTCAAACCCAAGTTCAAGAGACTTGGGTTTGAAGTGGACACCATTTTTTGct  
cgagctggcgaattcc  
>CD\_NM\_000425.2:904  
CgCctGcgagtctGGtatGAACCTGCAGCTGCTGAAAGTGTTC AAGAGACACTTTCAGCAGCTGCAGGGTCTTTTTTGct  
cgagctggcgaattcc  
>CD\_NM\_000425.2:166  
CgCctGcgagtctGGtatGAACAGATGACATCAGCCTCAAGTTCAAGAGACTTGAGGCTGATGTCATCTGTGTTTTTGct  
cgagctggcgaattcc  
>CD\_NM\_000425.2:3154  
CgCctGcgagtctGGtatGAAGGTTCCATATCTTGTTC A AATTC AAGAGATTTGAACAAGATATGGAACCTGTTTTTGct  
cgagctggcgaattcc  
>CD\_NM\_000425.2:3135  
CgCctGcgagtctGGtatGCGGAGGGCCAGTGCAACTTCAAGAGACTGAAGTTGCACTGGCCCTCTTTTTTGct  
cgagctggcgaattcc  
>CD\_NM\_000425.2:2044  
CgCctGcgagtctGGtatGAACCTCAAGCTGTCGCCCTATTTCAAGAGAATAGGGCGACAGCTTGAGGGTGTTTTTTGct  
cgagctggcgaattcc  
>CD\_NM\_000425.2:3381  
CgCctGcgagtctGGtatGACTGGTTCATCGGCTTTGTGAGTTCAAGAGACTCACAAAGCCGATGAACCAGCTTTTTTGct  
cgagctggcgaattcc  
>CD\_NM\_000425.2:1104  
CgCctGcgagtctGGtatGAAGAGGTCACCTGGAGAATCAATTC AAGAGATTTGATTCTCCAGGTGACCTCTGTTTTTGct  
cgagctggcgaattcc  
>CD\_NM\_000425.2:664  
CgCctGcgagtctGGtatGAACCAGGACCATCATTCAGAAGTTCAAGAGACTTCTGAATGATGGTCTGGTGTTTTTTGct  
cgagctggcgaattcc  
>CD\_NM\_000425.2:873  
CgCctGcgagtctGGtatGACGACCGTGTACCTACCAGAATTC AAGAGATTTGTTAGGTGACACGGTCGGTTTTTGct  
cgagctggcgaattcc  
>CD\_NM\_000425.2:1531  
CgCctGcgagtctGGtatGAAATGTTACCATCATGGCTAACTTCAAGAGAGTTAGCCATGATGGTAACATTTTTTTTGct  
cgagctggcgaattcc  
>CD\_NM\_000425.2:580

CgCtGcgagtctGGtatGAGGCCAGAACGGCAACCTCTACTTCAAGAGAGTAGAGGTTGCCGTTCTGGCCCTTTTTGct  
cgagctggcgaattcc  
>CD\_NM\_004648:252  
CgCtGcgagtctGGtatGACGGGAATTAATCTACAATCAATTCAGAGATTGATTGTAGATTAATCCCGTTTTGct  
cgagctggcgaattcc  
>CD\_NM\_004648:1034  
CgCtGcgagtctGGtatGCCGGGCAGCCAGCGGTCAAGATTCAAGAGATTGCTGACCGCTGGCTGCCCGTTTTGct  
cgagctggcgaattcc  
>CD\_NM\_004648:1264  
CgCtGcgagtctGGtatGACCGAGAAGAATGCCAGAGAAATTCAGAGATTTCTCTGGCATTCTTCTCGGGTTTTGct  
cgagctggcgaattcc  
>CD\_NM\_004648:1082  
CgCtGcgagtctGGtatGCCCCGAAGGAGCAGGGCTCAAATTCAGAGATTTGAGCCCTGCTCCTTCGGGTTTTGct  
cgagctggcgaattcc  
>CD\_NM\_080792.1:631  
CgCtGcgagtctGGtatGAAGAGAGCGTGTCTACAGCATTTCAAGAGAATGCTGTAGGACACGCTCTCTTTTTGct  
cgagctggcgaattcc  
>CD\_NM\_080792.1:874  
CgCtGcgagtctGGtatGCACAGCTGACCTGGTTGGAGAATTCAGAGATTCTCCAACCAGGTCAGCTGTATTTTTGct  
cgagctggcgaattcc  
>CD\_NM\_080792.1:1193  
CgCtGcgagtctGGtatGAGCCCTCTACCTCGTCCGAATCTTCAAGAGAGATTCGGACGAGGTAGAGGGCCTTTTTGct  
cgagctggcgaattcc  
>CD\_NM\_080792.1:299  
CgCtGcgagtctGGtatGCACTGTTTCAGACCTCACAAAGTTCAAGAGACTTTGTGAGGTCTGAAACAGTTTTTTGct  
cgagctggcgaattcc  
>CD\_NM\_080792.1:310  
CgCtGcgagtctGGtatGCCCTCACAAAGAGAAACAACATTTCAAGAGAATGTTGTTTCTTTGTGAGGTTTTTTGct  
cgagctggcgaattcc  
>CD\_NM\_080792.1:913  
CgCtGcgagtctGGtatGAAGAAACGGCTCAACCGTTACTTCAAGAGAGTAACGGTTGAGGCCGTTCTGTTTTGct  
cgagctggcgaattcc  
>CD\_NM\_080792.1:1517  
CgCtGcgagtctGGtatGAAGCGTCCAGGTCGAGGAAGTTCAAGAGACTTCCTCGGGACCTGGACGCTGTTTTGct  
cgagctggcgaattcc  
>CD\_NM\_080792.1:685  
CgCtGcgagtctGGtatGCGGACGTTCACTCTCAAGTCATTTCAAGAGAATGACTTGAGAGTGAACGTCCTTTTTGct  
cgagctggcgaattcc  
>CD\_NM\_080792.1:1231  
CgCtGcgagtctGGtatGCGGGCTCCACTTCTTCTACAAGTTCAAGAGACTTGTAGAAGAAGTGGAGCCCTTTTTGct  
cgagctggcgaattcc  
>CD\_NM\_080792.1:1374  
CgCtGcgagtctGGtatGAACACGGAGTATGCCAGCATTCTTCAAGAGAGAATGCTGGCATACTCCGTGTTTTTGct  
cgagctggcgaattcc  
>CD\_NM\_080792.1:1376  
CgCtGcgagtctGGtatGAACGGAGTATGCCAGCATTCAAGACTGAATGCTGGCATACTCCGTGTTTTTGct  
cgagctggcgaattcc  
>CD\_NM\_080792.1:740  
CgCtGcgagtctGGtatGACCTCTTCGTGGGACTGCCAACTTCAAGAGAGTTGGCAGTCCCACGAAGAGGTTTTGct  
cgagctggcgaattcc  
>CD\_NM\_080792.1:1204  
CgCtGcgagtctGGtatGCCGTCCGAATCAGACAGAAGAATTCAGAGATTTCTTGTCTGATTCCGACGATTTTTGct  
cgagctggcgaattcc  
>CD\_NM\_080792.1:786

CgCctGcgagtctGGtatGACCACCTTGAGGTTACTCAACTTCAAGAGAGTTGAGTAACCTCCAAGGTGGGTTTTTGct  
cgagctggcgaattcc  
>CD\_NM\_080792.1:1124  
CgCctGcgagtctGGtatGCTCTAATGAACGGAACATCTATTTCAAGAGAATAGATGTTCCGTTTCATTAGATTTTTTGct  
cgagctggcgaattcc  
>CD\_NM\_080792.1:1442  
CgCctGcgagtctGGtatGACTGGACATGGTCCACCTCAACTTCAAGAGAGTTGAGGTGGACCATGTCCAGGTTTTTGct  
cgagctggcgaattcc  
>CD\_NM\_080792.1:680  
CgCctGcgagtctGGtatGACGCGAGGACGTTCACTCTCAATTCAAGAGATTGAGAGTGAACGTCTCGCGGTTTTTGct  
cgagctggcgaattcc  
>CD\_NM\_080792.1:1230  
CgCctGcgagtctGGtatGAAGGGCTCCACTTCTTCTACAATTCAAGAGATTGTAGAAGAAGTGGAGCCCTGTTTTTGct  
cgagctggcgaattcc  
>CD\_NM\_080792.1:818  
CgCctGcgagtctGGtatGAGCAGAGAACCAGGTGAATGTCTTCAAGAGAGACATTCACCTGGTTCTCTGCCTTTTTTGct  
cgagctggcgaattcc  
>CD\_NM\_080792.1:595  
CgCctGcgagtctGGtatGCGCTCTCAGACTTCCAGACCAATTCAAGAGATTGGTCTGGAAGTCTGAGAGCTTTTTTGct  
cgagctggcgaattcc  
>CD\_NM\_080792.1:514  
CgCctGcgagtctGGtatGCGCACACAGTGAGCTTCACTGTTCAGAGACAGGTGAAGCTCACTGTGTGCTTTTTTGct  
cgagctggcgaattcc  
>CD\_NM\_080792.1:926  
CgCctGcgagtctGGtatGCACCGTTACAGAGAACAAGGATTTCAAGAGAATCCTTGTCTCTGTAACGGTTTTTTTGct  
cgagctggcgaattcc  
>CD\_NM\_080792.1:194  
CgCctGcgagtctGGtatGCGCGACCTCTCTGATCCCTGTGTTCAAGAGACACAGGGATCAGAGAGGTCGCATTTTTTGct  
cgagctggcgaattcc  
>CD\_NM\_080792.1:1202  
CgCctGcgagtctGGtatGACTCGTCCGAATCAGACAGAAGTTCAAGAGACTTCTGTCTGATTCCGACGAGTTTTTGct  
cgagctggcgaattcc  
>CD\_NM\_080792.1:1415  
CgCctGcgagtctGGtatGATCGGAGGACACCCTCACCTATTTCAAGAGAATAGGTGAGGGTGTCTCCGACTTTTTTGct  
cgagctggcgaattcc  
>CD\_NM\_080792.1:1139  
CgCctGcgagtctGGtatGAATCTATATTGTGGTGGGTGTGTTCAAGAGACACACCCACCACAATATAGATTTTTTGct  
cgagctggcgaattcc  
>CD\_NM\_080792.1:1206  
CgCctGcgagtctGGtatGATCCGAATCAGACAGAAGAAAGTTCAAGAGACTTCTTCTGTCTGATTCCGACTTTTTTGct  
cgagctggcgaattcc  
>CD\_NM\_080792.1:1109  
CgCctGcgagtctGGtatGAGCTGAGAACACTGGATCTAATTTCAAGAGAATTAGATCCAGTGTCTCAGCGTTTTTGct  
cgagctggcgaattcc  
>CD\_NM\_080792.1:156  
CgCctGcgagtctGGtatGCTGGTTGCAGCTGGAGAGACAGTTCAAGAGACTGTCTCTCCAGCTGCAACCAATTTTTGct  
cgagctggcgaattcc  
>CD\_NM\_006065:930  
CgCctGcgagtctGGtatGAAGCTTCGACCCTCATAGAGAATTCAAGAGATTCTCTATGAGGGTCAAGCTTTTTTGct  
cgagctggcgaattcc  
>CD\_NM\_006065:420  
CgCctGcgagtctGGtatGACCCTGACGACGTGGAGTTTAATTCAAGAGATTAACTCCACGTGTCAGGGCTTTTTTGct  
cgagctggcgaattcc  
>CD\_NM\_006065:185

CgCtGcgagtctGGtatGCCGGCCACTCTGCGCTGTGCTATTCAAGAGATAGCACAGCGCAGAGTGGCCGATTTTTGct  
cgagctggcgaattcc  
>CD\_NM\_006065:418  
CgCtGcgagtctGGtatGAAGCCCTGACGACGTGGAGTTTTTCAAGAGAAAACCTCCACGTCGTCAGGGCTTTTTTgct  
cgagctggcgaattcc  
>CD\_NM\_006065:227  
CgCtGcgagtctGGtatGAGGCCCATCATGTGGTTTAGAGTTCAAGAGACTCTAAACCACATGATGGGCCTTTTTgct  
cgagctggcgaattcc  
>CD\_NM\_006065:1044  
CgCtGcgagtctGGtatGCTGGGCAGCAAGCAGTCAGCAATTCAAGAGATTGCTGACTGCTTGCTGCCATTTTTTgct  
cgagctggcgaattcc  
>CD\_NM\_006065.1:641  
CgCtGcgagtctGGtatGAAGACAGTGTGTCCTACAGCATTTCAGAGAATGCTGTAGGACACACTGTCTTTTTTgct  
cgagctggcgaattcc  
>CD\_NM\_006065.1:420  
CgCtGcgagtctGGtatGACCTGACGACGTGGAGTTAAGTTCAAGAGACTTAAACTCCACGTCGTCAGGGTTTTTgct  
cgagctggcgaattcc  
>CD\_NM\_006065.1:930  
CgCtGcgagtctGGtatGCGCTTCGACCCTCATAGAGAACTTCAAGAGAGTTCTCTATGAGGGTCGAAGCTTTTTTgct  
cgagctggcgaattcc  
>CD\_NM\_006065.1:884  
CgCtGcgagtctGGtatGCACAGCTGACCTGGTTGGAGAATTCAAGAGATTCTCCAACCAGGTCAGCTGTATTTTTgct  
cgagctggcgaattcc  
>CD\_NM\_006065.1:185  
CgCtGcgagtctGGtatGAGGCCACTCTGCGCTGTGCTATTTCAAGAGAATAGCACAGCGCAGAGTGGCCGTTTTTgct  
cgagctggcgaattcc  
>CD\_NM\_006065.1:263  
CgCtGcgagtctGGtatGAGGAATTAATCTACAATCAGAATTCAAGAGATTCTGATTGTAGATTAATCCCTTTTTTgct  
cgagctggcgaattcc  
>CD\_NM\_006065.1:695  
CgCtGcgagtctGGtatGAGGACGTTCACTCTCAAGTCATTTCAAGAGAATGACTTGAGAGTGAACGTCCTTTTTTgct  
cgagctggcgaattcc  
>CD\_NM\_006065.1:1208  
CgCtGcgagtctGGtatGCCTACATCTGCTGGAACAGAATTCAAGAGATTCTGTTTTCCAGCAGATGTAGATTTTTTgct  
cgagctggcgaattcc  
>CD\_NM\_006065.1:750  
CgCtGcgagtctGGtatGACCTCTTCGTGGGACTGCCAACTTCAAGAGAGTTGGCAGTCCCACGAAGAGGGTTTTTgct  
cgagctggcgaattcc  
>CD\_NM\_006065.1:796  
CgCtGcgagtctGGtatGACCACCTTGAGGTTACTCAACTTCAAGAGAGTTGAGTAACCTCCAAGGTGGGTTTTTgct  
cgagctggcgaattcc  
>CD\_NM\_006065.1:1194  
CgCtGcgagtctGGtatGCGGTGTCTCTGCCATCTACATCTTCAAGAGAGATGTAGATGGCAGAGACACCATTTTTTgct  
cgagctggcgaattcc  
>CD\_NM\_006065.1:301  
CgCtGcgagtctGGtatGAGGGTAACAACCTGTTTCAGAACTTCAAGAGAGTTCTGAAACAGTTGTTACCCGTTTTTgct  
cgagctggcgaattcc  
>CD\_NM\_006065.1:605  
CgCtGcgagtctGGtatGCGCTCTCAGACTTCCAGACCAATTCAAGAGATTGGTCTGGAAGTCTGAGAGCTTTTTTgct  
cgagctggcgaattcc  
>CD\_NM\_006065.1:1071  
CgCtGcgagtctGGtatGCGCCCTGGAGATCTCAGCACACTTCAAGAGAGTGTGCTGAGATCTCCAGGGCATTTTTTgct  
cgagctggcgaattcc  
>CD\_NM\_006065.1:524

CgCtGcgagtctGGtatGCGCACACAGTGAGCTTACCTGTTCAAGAGACAGGTGAAGCTCACTGTGTGCTTTTTTgct  
cgagctggcgaattcc  
>CD\_NM\_006065.1:927  
CgCtGcgagtctGGtatGCACAGCTTCGACCCTCATAGAGTTCAAGAGACTCTATGAGGGTCGAAGCTGTTTTTTgct  
cgagctggcgaattcc  
>CD\_NM\_006065.1:227  
CgCtGcgagtctGGtatGAGCCCATCATGTGGTTTAGAGGTTCAAGAGACCTCTAAACCACATGATGGGCCTTTTTGct  
cgagctggcgaattcc  
>CD\_NM\_006065.1:309  
CgCtGcgagtctGGtatGCACTGTTTCAGAACTCACAAAGTTCAAGAGACTTGTGTGATTCTGAAACAGTTTTTgct  
cgagctggcgaattcc  
>CD\_NM\_006065.1:528  
CgCtGcgagtctGGtatGAACAGTGAGCTTACCTGCGAGTTCAAGAGACTCGCAGGTGAAGCTCACTGTGTTTTTgct  
cgagctggcgaattcc  
>CD\_NM\_006065.1:69  
CgCtGcgagtctGGtatGCCCTAGTCCCTTCCCTGCTGATGTTCAAGAGACATCAGCAGGAAAGGACTAGGATTTTTgct  
cgagctggcgaattcc  
>CD\_NM\_006065.1:1023  
CgCtGcgagtctGGtatGAACCTGTCAGGTGGAGCATGATTTCAAGAGAATCATGCTCCACCTGACAGGTTTTTTgct  
cgagctggcgaattcc  
>CD\_NM\_006065.1:972  
CgCtGcgagtctGGtatGAATGAGCTGGCTCCTGGTGAACCTCAAGAGAGTTCACCAGGAGCCAGCTCATTTTTgct  
cgagctggcgaattcc  
>CD\_NM\_006065.1:1203  
CgCtGcgagtctGGtatGCGCCATCTACATCTGCTGGAAATTCAGAGATTTCCAGCAGATGTAGATGGCATTTTTTgct  
cgagctggcgaattcc  
>CD\_NM\_006065.1:447  
CgCtGcgagtctGGtatGCGCAGGCACTGAGCTGTCTGTGTTCAAGAGACACAGACAGCTCAGTGCTGCTTTTTTgct  
cgagctggcgaattcc  
>CD\_NM\_006065.1:160  
CgCtGcgagtctGGtatGCCCCTATCAGTTGCAGCTGGAGTTCAAGAGACTCCAGCTGCAACTGATACGGATTTTTgct  
cgagctggcgaattcc  
>CD\_NM\_006065.1:324  
CgCtGcgagtctGGtatGAACAAAGAGAAACAACCTGAACTTCAAGAGAGTTCAGGTTGTTCTCTTTGTGTTTTTgct  
cgagctggcgaattcc  
>CD\_NM\_006065.1:936  
CgCtGcgagtctGGtatGAACCCTCATAGAGAACAAGGATTTCAAGAGAATCCTTGTCTCTATGAGGGCTTTTTGct  
cgagctggcgaattcc  
>CD\_NM\_080816:260  
CgCtGcgagtctGGtatGACCGAGAATTAATCTACAATCATTCAAGAGATGATTGTAGATTAATTCTCGGCTTTTTGct  
cgagctggcgaattcc  
>CD\_NM\_080816:417  
CgCtGcgagtctGGtatGAAGCCCTGAGAACGTGGAGTTTTTCAAGAGAAAACCTCCAGTTCTCAGGGCTTTTTGct  
cgagctggcgaattcc  
>CD\_NM\_080816:371  
CgCtGcgagtctGGtatGACCCAGCAGATGTCGGCACATATTCAAGAGATATGTGCCGACATCTGCTGGGGTTTTGct  
cgagctggcgaattcc  
>CD\_NM\_080816:160  
CgCtGcgagtctGGtatGATCCTGTTGGTCACAGTTGGAATTCAGAGATTCCTCAACTGTGACCAACAGGATTTTTgct  
cgagctggcgaattcc  
>CD\_NM\_018556.2:419  
CgCtGcgagtctGGtatGACCTGAGAACGTGGAGTTTAAAGTTCAAGAGACTTAAACTCCACGTTCTCAGGGTTTTGct  
cgagctggcgaattcc  
>CD\_NM\_018556.2:883

CgCctGcgagtctGGtatGCACAGCTGACCTGGTTGGAGAATTCAAGAGATTCTCCAACCAGGTCAGCTGTATTTTTGct  
cgagctggcgaattcc  
>CD\_NM\_018556.2:308  
CgCctGcgagtctGGtatGCACAGTTTCAGACCTCACAAAGTTCAAGAGACTTTGTGAGGTCTGAAACTGTTTTTTGct  
cgagctggcgaattcc  
>CD\_NM\_018556.2:640  
CgCctGcgagtctGGtatGAACAGAGTGTGGCCTACAGCATTTCAAGAGAATGCTGTAGGCCACACTCTGTCTTTTTGct  
cgagctggcgaattcc  
>CD\_NM\_018556.2:668  
CgCctGcgagtctGGtatGAACAGCCAGGGTGGTACTGGACTTCAAGAGAGTCCAGTACCACCTGGCTGTGTTTTGct  
cgagctggcgaattcc  
>CD\_NM\_018556.2:319  
CgCctGcgagtctGGtatGCCCTCACAAAGAGAAACAACATTTCAAGAGAATGTTGTTTCTCTTTGTGAGGTTTTTTGct  
cgagctggcgaattcc  
>CD\_NM\_018556.2:527  
CgCctGcgagtctGGtatGCACAGTGAGTTTCACCTGTGAGTTCAAGAGACTCACAGGTGAAACTCACTGTATTTTTGct  
cgagctggcgaattcc  
>CD\_NM\_018556.2:149  
CgCctGcgagtctGGtatGACCTGAGAAGCTCCTGTTGGTCTTCAAGAGAGACCAACAGGAGCTTCTCAGGCTTTTTGct  
cgagctggcgaattcc  
>CD\_NM\_018556.2:922  
CgCctGcgagtctGGtatGAAGAAACAGCCTCGACCCTTACTTCAAGAGAGTAAGGGTCGAGGCTGTTTCTTTTTGct  
cgagctggcgaattcc  
>CD\_NM\_018556.2:985  
CgCctGcgagtctGGtatGCGGTGAACATATCTGACCAAAGTTCAAGAGACTTTGGTCAGATATGTTCCACATTTTTGct  
cgagctggcgaattcc  
>CD\_NM\_018556.2:1015  
CgCctGcgagtctGGtatGCGGTCCCTCACCTGCCAGGTGAATTCAAGAGATTACCTGGCAGGTGAGGACCATTTTTGct  
cgagctggcgaattcc  
>CD\_NM\_018556.2:1070  
CgCctGcgagtctGGtatGCGCCCTGGAGGTCACAGTCCACTTCAAGAGAGTGGACTGTGACCTCCAGGGCATTTTTGct  
cgagctggcgaattcc  
>CD\_NM\_018556.2:749  
CgCctGcgagtctGGtatGACCTCTTCGTGGGACTGCCAACTTCAAGAGAGTTGGCAGTCCCACGAAGAGGGTTTTTTGct  
cgagctggcgaattcc  
>CD\_NM\_018556.2:1120  
CgCctGcgagtctGGtatGATGGCCCCGCATCATCTTACTTCAAGAGAGTAAGAGATGATGCCGGGCCAGTTTTTTGct  
cgagctggcgaattcc  
>CD\_NM\_018556.2:795  
CgCctGcgagtctGGtatGACCACCTTGAGGTTACTCAACTTCAAGAGAGTTGAGTAACCTCCAAGGTGGGTTTTTTGct  
cgagctggcgaattcc  
>CD\_NM\_018556.2:446  
CgCctGcgagtctGGtatGCCAGGCACTGAGATGGCTTTGTTCAAGAGACAAAGCCATCTCAGTGCCTGGTTTTTTGct  
cgagctggcgaattcc  
>CD\_NM\_018556.2:160  
CgCctGcgagtctGGtatGCCCTGTTGGTCACAGTTGGAAATTCAAGAGATTTCCAACCTGTGACCAACAGGATTTTTGct  
cgagctggcgaattcc  
>CD\_NM\_018556.2:971  
CgCctGcgagtctGGtatGAACAAGCTGGTTCCTGGTGAACCTTCAAGAGAGTTCACCAGGAACCAGCTTGTCTTTTTGct  
cgagctggcgaattcc  
>CD\_NM\_018556.2:371  
CgCctGcgagtctGGtatGACCAGCAGATGTCGGCACATACTTCAAGAGAGTATGTGCCGACATCTGCTGGGTTTTTTGct  
cgagctggcgaattcc  
>CD\_NM\_018556.2:1142



CgCctGcgagtctGGtatGCGCGCTGCTCCTCATAGCTGTCTTCAAGAGAGACAGCTATGAGGAGCAGCGCATT TTTTGct  
cgagctggcgaattcc  
>CD\_NM\_018556.2:694  
CgCctGcgagtctGGtatGAGGACGTTTCGCTCTCAGGTCATTTCAAGAGAATGACCTGAGAGCGAACGTCCTTT TTTTGct  
cgagctggcgaattcc  
>CD\_NM\_018556.2:1022  
CgCctGcgagtctGGtatGAACCTGCCAGGTGAAGCATGATTTCAAGAGAATCATGCTTACCTGGCAGGTGTT TTTTGct  
cgagctggcgaattcc  
>CD\_NM\_018556.2:604  
CgCctGcgagtctGGtatGCGCTCTCAGACTTCCAGACCAATTCAAGAGATTGGTCTGGAAGTCTGAGAGCT TTTTTTGct  
cgagctggcgaattcc  
>CD\_NM\_018556.2:935  
CgCctGcgagtctGGtatGAACCTTACAGAGAACAAGGATTTCAAGAGAATCCTTGTTCTCTGTAAGGGTCT TTTTTTGct  
cgagctggcgaattcc  
>CD\_NM\_018556.2:1133  
CgCctGcgagtctGGtatGCTCTCTTACTGCGCTGCTCCTCTTCAAGAGAGAGGAGCAGCGCAGTAAGAGAT TTTTTTGct  
cgagctggcgaattcc  
>CD\_NM\_018556.2:926  
CgCctGcgagtctGGtatGCACAGCCTCGACCCTTACAGAGTTCAAGAGACTCTGTAAGGGTCGAGGCTGT TTTTTTGct  
cgagctggcgaattcc  
>CD\_NM\_018556.2:701  
CgCctGcgagtctGGtatGCCGCTCTCAGGTCATCTGCGAGTTCAAGAGACTCGCAGATGACCTGAGAGCGA TTTTTTGct  
cgagctggcgaattcc  
>CD\_NM\_018556.2:1096  
CgCctGcgagtctGGtatGCGGACCAGAGCTCAGATGCTACTTCAAGAGAGTAGCATCTGAGCTCTGGTCCT TTTTTTGct  
cgagctggcgaattcc  
>CD\_NM\_018556.2:256  
CgCctGcgagtctGGtatGAAGGCCGAGAATTAATCTACAATTCAAGAGATTGTAGATTAATTCTCGGCCTG TTTTTTGct  
cgagctggcgaattcc  
>CD\_NM\_000150:709  
CgCctGcgagtctGGtatGCGGCTGTGTGTTTCTTCTCTTCAAGAGATAGGAGAAGAAACACACAGCCAT TTTTTTGct  
cgagctggcgaattcc  
>CD\_NM\_000149:963  
CgCctGcgagtctGGtatGCGGGATATCATGTCCAACCCTATTCAAGAGATAGGGTTGGACATGATATCCAT TTTTTTGct  
cgagctggcgaattcc  
>CD\_NM\_000149:1020  
CgCctGcgagtctGGtatGAAGCGCTGGATCTGGTTCAACTTTCAAGAGAAGTTGAACCAGATCCAGCGCTG TTTTTTGct  
cgagctggcgaattcc  
>CD\_NM\_000149:674  
CgCctGcgagtctGGtatGACGCTGTCTGGCCGCACTGCTATTCAAGAGATAGCAGTGC GGCCAGACAGCGGTT TTTTTTGct  
cgagctggcgaattcc  
>CD\_NM\_000149.1:1092  
CgCctGcgagtctGGtatGCTCTCACCATGTCCTACCGCAGTTCAAGAGACTGCGGTAGGACATGGTGAGAT TTTTTTGct  
cgagctggcgaattcc  
>CD\_NM\_000149.1:963  
CgCctGcgagtctGGtatGAGGATATCATGTCCAACCCTAATTCAAGAGATTAGGGTTGGACATGATATCC TTTTTTGct  
cgagctggcgaattcc  
>CD\_NM\_000149.1:709  
CgCctGcgagtctGGtatGAGCTGTGTGTTTCTTCTCTACTTCAAGAGAGTAGGAGAAGAAACACACAGCCT TTTTTTGct  
cgagctggcgaattcc  
>CD\_NM\_000149.1:937  
CgCctGcgagtctGGtatGAGCAGACACGGTCATCGTGC ACTTCAAGAGAGTGCACGATGACCGTGTCTGCCTTT TTTTGct  
cgagctggcgaattcc  
>CD\_NM\_000149.1:1399

CgCtGcgagtctGGtatGAACCGAGAAGCTGTGGAGGAACCTCAAGAGAGTTCCTCCACAGCTTCTCGGTGTTTTTGct  
cgagctggcgaattcc  
>CD\_NM\_000149.1:861  
CgCtGcgagtctGGtatGATCTGTCCCGCTGTTCAAGAGATTTCAAGAGAATCTCTGAACAGCGGGACAGAGTTTTTGct  
cgagctggcgaattcc  
>CD\_NM\_000149.1:1020  
CgCtGcgagtctGGtatGCGCGCTGGATCTGGTTCAACTTTTTCAAGAGAAAGTTGAACCAGATCCAGCGTTTTTTGct  
cgagctggcgaattcc  
>CD\_NM\_000149.1:1077  
CgCtGcgagtctGGtatGCGGACAGATACTTCAATCTCACTTCAAGAGAGTGAGATTGAAGTATCTGTCCATTTTTGct  
cgagctggcgaattcc  
>CD\_NM\_000149.1:705  
CgCtGcgagtctGGtatGCGGTGGCTGTGTGTTTCTTCTTCAAGAGAGAGAAGAAACACACAGCCACCATTTTTGct  
cgagctggcgaattcc  
>CD\_NM\_000149.1:1335  
CgCtGcgagtctGGtatGCGGAGACGCTGTCCCGGTACAATTCAAGAGATTGTACCGGGACAGCGTCTCCATTTTTGct  
cgagctggcgaattcc  
>CD\_NM\_000149.1:1177  
CgCtGcgagtctGGtatGCCCCTCAACCTCTCGGCCAAGTTCAAGAGACTTGGCCGAGAGGTTGAGCGTTTTTTGct  
cgagctggcgaattcc  
>CD\_NM\_000149.1:1240  
CgCtGcgagtctGGtatGATCAGCCAGGGTGCCTACTACTTCAAGAGAGTAGTAGCGCACCCCTGGCTGAGTTTTTGct  
cgagctggcgaattcc  
>CD\_NM\_000149.1:679  
CgCtGcgagtctGGtatGCCTGGCCGCACTGCTATTTCAAGAGACTGAAATAGCAGTGCGGCCAGATTTTTTGct  
cgagctggcgaattcc  
>CD\_NM\_000149.1:740  
CgCtGcgagtctGGtatGCCCCGAGACGATGCCACTGGATTTCAAGAGAATCCAGTGGCATCGTCTCGGGATTTTTGct  
cgagctggcgaattcc  
>CD\_NM\_000149.1:674  
CgCtGcgagtctGGtatGAGCTGTCTGGCCGCACTGCTATTTCAAGAGAATAGCAGTGCGGCCAGACAGCGTTTTTGct  
cgagctggcgaattcc  
>CD\_NM\_000149.1:1071  
CgCtGcgagtctGGtatGCAGCCCTGGACAGATACTTCAATTTCAAGAGATTGAAGTATCTGTCCAGGGCTTTTTTTGct  
cgagctggcgaattcc  
>CD\_NM\_000149.1:910  
CgCtGcgagtctGGtatGAACTGCCGACCGCAAGGTGTACTTCAAGAGAGTACACCTTGCGGTGGCAGTGTTTTTGct  
cgagctggcgaattcc  
>CD\_NM\_000149.1:1276  
CgCtGcgagtctGGtatGCCATCTCAAGGTGGACGTGTACTTCAAGAGAGTACACGTCCACCTTGAGATGATTTTTGct  
cgagctggcgaattcc  
>CD\_NM\_000149.1:819  
CgCtGcgagtctGGtatGCCCTGATCCTGCTATGGACATGTTCAAGAGACATGTCCATAGCAGGATCAGGATTTTTGct  
cgagctggcgaattcc  
>CD\_NM\_000149.1:1117  
CgCtGcgagtctGGtatGATCCGACATCTCACGCCCTACTTCAAGAGAGTAGGGCGTGAAGATGTCGGAGTTTTTGct  
cgagctggcgaattcc  
>CD\_NM\_000149.1:1651  
CgCtGcgagtctGGtatGATGCTGGAACTGCAGCAGGAATTTCAAGAGATTCTGCTGCAGTTTCCAGCAGTTTTTGct  
cgagctggcgaattcc  
>CD\_NM\_000149.1:1212  
CgCtGcgagtctGGtatGACTGGGCGGTGTCCAACCTGGAATTTCAAGAGATTCCAGTTGGACACCGCCAGTTTTTGct  
cgagctggcgaattcc  
>CD\_NM\_000149.1:1584

CgCctGcgagtctGGtatGACTACTTTCGCTGGCGGGAGACTTCAAGAGAGTCTCCCGCCAGCGAAAGTAGCTTTTTTGct  
cgagctggcgaattcc  
>CD\_NM\_000149.1:1546  
CgCctGcgagtctGGtatGACTGCAGGAGCTGGACAAGGACTTCAAGAGAGTCCCTTGTCAGCTCCTGCAGGTTTTTGct  
cgagctggcgaattcc  
>CD\_NM\_000149.1:855  
CgCctGcgagtctGGtatGATGTGGCTCTGTCCCGCTGTTCTTCAAGAGAGAACAGCGGGACAGAGCCACAGTTTTTGct  
cgagctggcgaattcc  
>CD\_NM\_000149.1:1570  
CgCctGcgagtctGGtatGAGCCCGCTACCTGAGCTACTTTTTCAAGAGAAAAGTAGCTCAGGTAGCGGGCGTTTTTGct  
cgagctggcgaattcc  
>CD\_NM\_000149.1:1264  
CgCctGcgagtctGGtatGAAGCCTGCAGGCTCATCTCAAGTTCAAGAGACTTGAGATGAGCCTGCAGGCTTTTTTGct  
cgagctggcgaattcc  
>CD\_NM\_000149.1:1537  
CgCctGcgagtctGGtatGAGCCCGGTACCTGCAGGAGCTGTTCAAGAGACAGCTCCTGCAGGTACCGGGCCTTTTTTGct  
cgagctggcgaattcc  
>CD\_NM\_000149.1:1333  
CgCctGcgagtctGGtatGAATGGAGACGCTGTCCCGGTACTTCAAGAGAGTACCGGGACAGCGTCTCCATTTTTTGct  
cgagctggcgaattcc  
>CD\_NM\_000639:395  
CgCctGcgagtctGGtatGAGCCTGTGTCTCCTTGTGATGTTTTCAAGAGAACATCACAAGGAGACACAGGCCTTTTTTGct  
cgagctggcgaattcc  
>CD\_NM\_000639:690  
CgCctGcgagtctGGtatGCGGGTGGCCTTGTGATCAATGATTCAAGAGATCATTGATCACAAGGCCACCCTTTTTTGct  
cgagctggcgaattcc  
>CD\_NM\_000639:716  
CgCctGcgagtctGGtatGAGGCTGTACTTTGTATATTCCATTCAAGAGATGGAATATACAAAGTACAGCCCTTTTTTGct  
cgagctggcgaattcc  
>CD\_NM\_000639.1:393  
CgCctGcgagtctGGtatGCGGCCTGTGTCTCCTTGTGATGTTCAAGAGACATCACAAGGAGACACAGGCCTTTTTTGct  
cgagctggcgaattcc  
>CD\_NM\_000639.1:690  
CgCctGcgagtctGGtatGAGGTGGCCTTGTGATCAATGAATTCAAGAGATTCAATTGATCACAAGGCCACCCTTTTTTGct  
cgagctggcgaattcc  
>CD\_NM\_000639.1:910  
CgCctGcgagtctGGtatGCCAGTGCTGATCATTTATATGTTCAAGAGACATATAAATGATCAGCACTGGTTTTTTGct  
cgagctggcgaattcc  
>CD\_NM\_000639.1:721  
CgCctGcgagtctGGtatGCACTTTGTATATTCCAAAGTATTTCAAGAGAATACTTTGGAATATACAAAGTATTTTTGct  
cgagctggcgaattcc  
>CD\_NM\_000639.1:915  
CgCctGcgagtctGGtatGCGCTGATCATTTATATGTCAACTTCAAGAGAGTTGACATATAAATGATCAGCATTTTTGct  
cgagctggcgaattcc  
>CD\_NM\_000639.1:919  
CgCctGcgagtctGGtatGAATCATTTATATGTCAACGTATTTCAAGAGAATACGTTGACATATAAATGATCTTTTTGct  
cgagctggcgaattcc  
>CD\_NM\_000639.1:624  
CgCctGcgagtctGGtatGATCCATGCCCTCTGGAATGGGAATTCAAGAGATCCCATTCAGAGGCATGGACTTTTTGct  
cgagctggcgaattcc  
>CD\_NM\_000639.1:666  
CgCctGcgagtctGGtatGACTTCTGGAGTGAAGTATAAGTTCAAGAGACTTATACTTCACTCCAGAAAGCTTTTTGct  
cgagctggcgaattcc  
>CD\_NM\_000639.1:185

CgCtGcgagtctGGtatGACCAGATCTACTGGGTGGACAGTTCAAGAGACTGTCCACCCAGTAGATCTGGGTTTTTGct  
cgagctggcgaattcc  
>CD\_NM\_000639.1:263  
CgCtGcgagtctGGtatGCGCCAGAAAGCCTGGTCAAAGTTCAAGAGACTTTGACCAGGCCTTCTGGGCATTTTTGct  
cgagctggcgaattcc  
>CD\_NM\_000639.1:586  
CgCtGcgagtctGGtatGCGGAAAGTGGCCATTTAACAGTTCAAGAGACTGTTAAATGGGCCACTTTCCTTTTTTGct  
cgagctggcgaattcc  
>CD\_NM\_000639.1:692  
CgCtGcgagtctGGtatGATGGCCTTGTGATCAATGAACTTCAAGAGAGTTTCATTGATCACAAGGCCACTTTTTGct  
cgagctggcgaattcc  
>CD\_NM\_000639.1:474  
CgCtGcgagtctGGtatGACTACAGAAGGAGCTGGCAGAATTCAAGAGATTCTGCCAGCTCCTTCTGTAGGTTTTGct  
cgagctggcgaattcc  
>CD\_NM\_000639.1:907  
CgCtGcgagtctGGtatGATTACCAGTGCTGATCATTATTTTCAAGAGAATAAATGATCAGCACTGGTAAGTTTTGct  
cgagctggcgaattcc  
>CD\_NM\_000639.1:982  
CgCtGcgagtctGGtatGCTCGGCTTATATAAGCTCTAAGTTCAAGAGACTTAGAGCTTATATAAGCCGAATTTTTGct  
cgagctggcgaattcc  
>CD\_NM\_000639.1:659  
CgCtGcgagtctGGtatGCTGTCTGCTTCTGGAGTGAATTCAAGAGATTCACCTCCAGAAAGCAGGACAATTTTTGct  
cgagctggcgaattcc  
>CD\_NM\_000639.1:931  
CgCtGcgagtctGGtatGATCAACGTATCTGAGCTCTCTTTCAAGAGAGAGAGACTCAGATACGTTGACTTTTTGct  
cgagctggcgaattcc  
>CD\_NM\_000639.1:334  
CgCtGcgagtctGGtatGACGCCACCACTGCCTCCACTACTTCAAGAGAGTAGTGGAGGCAGTGGTGGCGTTTTGct  
cgagctggcgaattcc  
>CD\_NM\_000639.1:785  
CgCtGcgagtctGGtatGCGGTCTACATGAGGAACTCTAATTCAAGAGATTAGAGTTCCTCATGTAGACCTTTTTGct  
cgagctggcgaattcc  
>CD\_NM\_000639.1:235  
CgCtGcgagtctGGtatGAGCACAGTTCTTCCCTGTCCAATTCAAGAGATTGGACAGGGAAGAACTGTGCCTTTTTGct  
cgagctggcgaattcc  
>CD\_NM\_000639.1:426  
CgCtGcgagtctGGtatGCCTGGTTGCCTTGGTAGGATTGTTCAAGAGACAATCCTACCAAGGCAACCAGATTTTTGct  
cgagctggcgaattcc  
>CD\_NM\_000639.1:596  
CgCtGcgagtctGGtatGACCATTTAACAGGCAAGTCCAATTCAAGAGATTGGACTTGCCTGTTAAATGGGTTTTGct  
cgagctggcgaattcc  
>CD\_NM\_000639.1:836  
CgCtGcgagtctGGtatGAGAAGATGATGAGCTACTGCACTTCAAGAGAGTGCAGTAGCTCATCATCTTCCTTTTTGct  
cgagctggcgaattcc  
>CD\_NM\_000639.1:608  
CgCtGcgagtctGGtatGACAAGTCCAACCTCAAGGTCCATTTCAAGAGAATGGACCTTGAGTTGGACTTGCTTTTTGct  
cgagctggcgaattcc  
>CD\_NM\_000639.1:912  
CgCtGcgagtctGGtatGAAGTGCTGATCATTATATGTCTTCAAGAGAGACATATAAATGATCAGCACTGTTTTGct  
cgagctggcgaattcc  
>CD\_NM\_000639.1:417  
CgCtGcgagtctGGtatGCTTCATGGTTCTGGTTGCCTTGTTCAGAGACAAGGCAACCAGAACCATGAAATTTTTGct  
cgagctggcgaattcc  
>CD\_NM\_000639.1:711

CgCctGcgagtctGGtatGCACTGGGCTGTACTTTGTATATTTCAAGAGAATATACAAAGTACAGCCCAGTTTTTTTgct  
cgagctggcgaattcc  
>CD\_NM\_000639.1:813  
CgCctGcgagtctGGtatGACAGGATCTGGTGATGATGGAGTTCAAGAGACTCCATCATCACCAGATCCTGGTTTTTgct  
cgagctggcgaattcc  
>CD\_NM\_000639.1:421  
CgCctGcgagtctGGtatGCTGGTTCTGGTTGCCTTGGTAGTTCAAGAGACTACCAAGGCAACCAGAACCATTTTTTgct  
cgagctggcgaattcc  
>CD\_NM\_000639.1:779  
CgCctGcgagtctGGtatGACCACAAGGTCTACATGAGGAATTCAAGAGATTCCTCATGTAGACCTTGTGGCTTTTTTgct  
cgagctggcgaattcc  
>CD\_NM\_007128.2:79  
CgCctGcgagtctGGtatGCCCTCAGCCGGTGCTGCATCAGTTCAAGAGACTGATGCAGCACCGGCTGAGGATTTTTTgct  
cgagctggcgaattcc  
>CD\_NM\_007128.2:217  
CgCctGcgagtctGGtatGCCCCAGGTTCTGCTGAGATATTTCAAGAGAATATCTCAGCAGGAACCTGGGATTTTTTgct  
cgagctggcgaattcc  
>CD\_NM\_007128.2:43  
CgCctGcgagtctGGtatGACTGCTCATGCTGTTTGTCTACTTCAAGAGAGTAGACAAACAGCATGAGCAGTTTTTgct  
cgagctggcgaattcc  
>CD\_NM\_007128.2:228  
CgCctGcgagtctGGtatGCGCTGAGATATTTCTCACAATCTTCAAGAGAGATTGTGAGAAATATCTCAGCATTTTTTgct  
cgagctggcgaattcc  
>CD\_NM\_007128.2:37  
CgCctGcgagtctGGtatGCCCTGTCTGCTCATGCTGTTTTTCAAGAGAAAACAGCATGAGCAGGACAGGATTTTTTgct  
cgagctggcgaattcc  
>CD\_NM\_007128.2:31  
CgCctGcgagtctGGtatGATGGGCTCCTGTCTGCTCATGTTCAAGAGACATGAGCAGGACAGGAGCCCAGTTTTTgct  
cgagctggcgaattcc  
>CD\_NM\_007128.2:135  
CgCctGcgagtctGGtatGCCCGCTCACCTGCACCCTGAGTTCAAGAGACTCAGGGTGCAGGTGAGGCGGATTTTTTgct  
cgagctggcgaattcc  
>CD\_NM\_007128.2:407  
CgCctGcgagtctGGtatGAAGAGGGAGTGGGAGGAAGAAATTTCAAGAGATTTCTTCTCCCTCCCTCTTTTTTgct  
cgagctggcgaattcc  
>CD\_NM\_007128.2:237  
CgCctGcgagtctGGtatGCTTTCTCACAATCAGACAAGAGTTCAAGAGACTCTTGTCTGATTGTGAGAAATTTTTTgct  
cgagctggcgaattcc  
>CD\_NM\_007128.2:230  
CgCctGcgagtctGGtatGATGAGATATTTCTCACAATCAGTTCAAGAGACTGATTGTGAGAAATATCTCAGTTTTTgct  
cgagctggcgaattcc  
>CD\_NM\_007128.2:343  
CgCctGcgagtctGGtatGACCTGAGGACGAGGCTATGTATTTCAAGAGAATACATAGCCTCGTCTCAGGCTTTTTTgct  
cgagctggcgaattcc  
>CD\_NM\_007128.2:292  
CgCctGcgagtctGGtatGCTCCAAAGATGTGGCCAGGAACCTTCAAGAGAGTTCTGGCCACATCTTTGGATTTTTTgct  
cgagctggcgaattcc  
>CD\_NM\_007128.2:413  
CgCctGcgagtctGGtatGAAGTGGGAGGAAGAAATGGAACCTTCAAGAGAGTTCCATTTCTTCTCCCTCCCTTTTTTgct  
cgagctggcgaattcc  
>CD\_NM\_007128.2:45  
CgCctGcgagtctGGtatGCGCTCATGCTGTTTGTCTACTGTTCAAGAGACAGTAGACAAACAGCATGAGCATTTTTTgct  
cgagctggcgaattcc  
>CD\_NM\_007128.2:113

CgCctGcgagtctGGtatGCCCTCGGCCCTTGAACCACAATTCAAGAGATTGTGGTTCCAAGGGCCGAGGATTTTTTGct  
cgagctggcgaattcc  
>CD\_NM\_007128.2:175  
CgCctGcgagtctGGtatGCGTGTACAGCGTCTACTGGTACTTCAAGAGAGTACCAGTAGACGCTGTACACATTTTTTGct  
cgagctggcgaattcc  
>CD\_NM\_007128.2:388  
CgCctGcgagtctGGtatGATCGGAGAAGGAGGAGAGGGAGTTCAAGAGACTCCCTCTCCTCCTTCTCCGAGTTTTTGct  
cgagctggcgaattcc  
>CD\_NM\_007128.2:34  
CgCctGcgagtctGGtatGAGCTCCTGTCTGCTCATGCTGTTCAAGAGACAGCATGAGCAGGACAGGAGCCTTTTTTGct  
cgagctggcgaattcc  
>CD\_NM\_007128.2:409  
CgCctGcgagtctGGtatGAAGGGAGTGGGAGGAAGAAATGTTCAAGAGACATTTCTTCTCCCACTCCCTCTTTTTTGct  
cgagctggcgaattcc  
>CD\_NM\_007128.2:222  
CgCctGcgagtctGGtatGAGTTCCTGCTGAGATATTTCTTCAAGAGAGAGAAATATCTCAGCAGGAACCTTTTTTGct  
cgagctggcgaattcc  
>CD\_NM\_007128.2:328  
CgCctGcgagtctGGtatGAATCTCTGAGCTGCAGCCTGAGTTCAAGAGACTCAGGCTGCAGCTCAGAGATTTTTTGct  
cgagctggcgaattcc  
>CD\_NM\_007128.2:42  
CgCctGcgagtctGGtatGCCCTGCTCATGCTGTTTGTCTATTCAAGAGATAGACAAACAGCATGAGCAGGATTTTTTGct  
cgagctggcgaattcc  
>CD\_NM\_007128.2:76  
CgCctGcgagtctGGtatGCGGTCTCAGCCGGTGTGCATTTCAAGAGAATGCAGCACCGGCTGAGGACCATTTTTTGct  
cgagctggcgaattcc  
>CD\_NM\_007128.2:142  
CgCctGcgagtctGGtatGAACCTGCACCTGAGGAACGACTTCAAGAGAGTCGTTCCCTCAGGGTGCAGGTGTTTTTGct  
cgagctggcgaattcc  
>CD\_NM\_007128.2:220  
CgCctGcgagtctGGtatGAAGGTTCTGCTGAGATATTTCTTCAAGAGAGAAATATCTCAGCAGGAACCTGTTTTTGct  
cgagctggcgaattcc  
>CD\_NM\_007128.2:40  
CgCctGcgagtctGGtatGCGTCTCTCATGCTGTTTGTCTTCAAGAGAGACAAACAGCATGAGCAGGACATTTTTTGct  
cgagctggcgaattcc  
>CD\_NM\_007128.2:355  
CgCctGcgagtctGGtatGAGCTATGTATTACTGTGCTATGTTCAAGAGACATAGCACAGTAATACATAGCCTTTTTTGct  
cgagctggcgaattcc  
>CD\_NM\_007128.2:148  
CgCctGcgagtctGGtatGAACCTGAGGAACGACCATGACTTCAAGAGAGTCATGGTCGTTCCCTCAGGGTGTTTTTGct  
cgagctggcgaattcc  
>CD\_NM\_007128.2:443  
CgCctGcgagtctGGtatGACCAGGACACGTGTCCCTTGAATTCAAGAGATTCAAGGGACACGTGTCTGGCTTTTTTGct  
cgagctggcgaattcc  
>CD\_NM\_007128.2:241  
CgCctGcgagtctGGtatGATCACAATCAGACAAGAGCCAGTTCAAGAGACTGGCTCTTGTCTGATTGTGAGTTTTTGct  
cgagctggcgaattcc  
>CD\_NM\_007128.2:160  
CgCctGcgagtctGGtatGAGACCATGACATCGGTGTGTACTTCAAGAGAGTACACACCGATGTCATGGTCGTTTTTGct  
cgagctggcgaattcc  
>CD\_NM\_007128.2:181  
CgCctGcgagtctGGtatGAAGCGTCTACTGGTACCAGCAGTTCAAGAGACTGCTGGTACCAGTAGACGCTGTTTTTGct  
cgagctggcgaattcc  
>CD\_NM\_007128.2:346

CgCctGcgagtctGGtatGCGAGGACGAGGCTATGTATTACTTCAAGAGAGTAATACATAGCCTCGTCCTCATTTTTTGct  
cgagctggcgaattcc  
>CD\_NM\_020070:511  
CgCctGcgagtctGGtatGCACACTGGTGTGTCTCATGAATTTCAAGAGAATTCATGAGACACACCAGTGTATTTTTGct  
cgagctggcgaattcc  
>CD\_NM\_020070:506  
CgCctGcgagtctGGtatGCAGGCTACACTGGTGTGTCTCATTCAAGAGATGAGACACACCAGTGTAGCCTTTTTTTGct  
cgagctggcgaattcc  
>CD\_NM\_020070:635  
CgCctGcgagtctGGtatGCACGCGGCCAGCAGCTACCTGATTCAAGAGATCAGGTAGCTGCTGGCCGCGTATTTTTGct  
cgagctggcgaattcc  
>CD\_NM\_020070:609  
CgCctGcgagtctGGtatGAGCCCTCCAAACAGAGCAACAATTCAAGAGATTGTTGCTCTGTTTGGAGGGCGTTTTTgct  
cgagctggcgaattcc  
>CD\_X52203:608  
CgCctGcgagtctGGtatGCCGCCCTCCAAACAGAGCAACAATTCAAGAGATGTTGCTCTGTTTGGAGGGCGTTTTTgct  
cgagctggcgaattcc  
>CD\_NM\_020070:200  
CgCctGcgagtctGGtatGATGCTGGGTCTGGCCGTGGTAATTCAAGAGATTACCACGGCCAGACCCAGCAGTTTTTgct  
cgagctggcgaattcc  
>CD\_NM\_020070:236  
CgCctGcgagtctGGtatGAGCCCAACAGCTGCATCGCAGATTCAAGAGATCTGCGATGCAGCTGTTGGGCGTTTTTgct  
cgagctggcgaattcc  
>CD\_NM\_020070:204  
CgCctGcgagtctGGtatGCGGGTCTGGCCGTGGTAACCCATTCAAGAGATGGGTTACCACGGCCAGACCCATTTTTgct  
cgagctggcgaattcc  
>CD\_NM\_020070.2:483  
CgCctGcgagtctGGtatGATCTGAGGAGCTCCAAGCCAACTTCAAGAGAGTTGGCTTGGAGCTCCTCAGAGTTTTTgct  
cgagctggcgaattcc  
>CD\_NM\_020070.2:513  
CgCctGcgagtctGGtatGCCTGGTGTGTCTCATGAATGACTTCAAGAGAGTCATTCATGAGACACACCAGTTTTTgct  
cgagctggcgaattcc  
>CD\_NM\_020070.2:668  
CgCctGcgagtctGGtatGCGCAGTGGAGGTCCTCGAGAAGTTCAAGAGACTTCTGCGGGACCTCCACTGCTTTTTTgct  
cgagctggcgaattcc  
>CD\_NM\_020070.2:539  
CgCctGcgagtctGGtatGCTCCGGGAATCTTGACGGTGACTTCAAGAGAGTCACCGTCAAGATTCCCGGATTTTTTgct  
cgagctggcgaattcc  
>CD\_NM\_020070.2:391  
CgCctGcgagtctGGtatGCACTCAGTGACGCATGTGTTTGTTC AAGAGACAAACACATGCGTCACTGAGTTTTTgct  
cgagctggcgaattcc  
>CD\_NM\_020070.2:204  
CgCctGcgagtctGGtatGAGGTCTGGCCGTGGTAACCCATTTCAAGAGAATGGGTTACCACGGCCAGACCCTTTTTgct  
cgagctggcgaattcc  
>CD\_NM\_020070.2:200  
CgCctGcgagtctGGtatGCGCTGGGTCTGGCCGTGGTAACCTTCAAGAGAGTTACCACGGCCAGACCCAGCATTTTTTgct  
cgagctggcgaattcc  
>CD\_NM\_020070.2:635  
CgCctGcgagtctGGtatGCCGCGGCCAGCAGCTACCTGAGTTCAAGAGACTCAGGTAGCTGCTGGCCGCGTTTTTgct  
cgagctggcgaattcc  
>CD\_NM\_020070.2:693  
CgCctGcgagtctGGtatGAAGCTGCCAGGTCATGCACGAATTCAAGAGATTCGTGCATGACCTGGCAGCTTTTTTgct  
cgagctggcgaattcc  
>CD\_NM\_020070.2:602

CgCtGcgagtctGGtatGCGACCACGCCCTCCAAACAGAGTTCAAGAGACTCTGTTTGGAGGGCGTGGTCATTTTTGct  
cgagctggcgaattcc  
>CD\_NM\_020070.2:546  
CgCtGcgagtctGGtatGCATCTTGACGGTGACCTGGAAGTTCAAGAGACTTCCAGGTACCGTCAAGATTTTTTTGct  
cgagctggcgaattcc  
>CD\_NM\_020070.2:552  
CgCtGcgagtctGGtatGAACGGTGACCTGGAAGGCAGATTTCAAGAGAATCTGCCTTCCAGGTACCGTCTTTTTGct  
cgagctggcgaattcc  
>CD\_NM\_020070.2:506  
CgCtGcgagtctGGtatGCGGCTACACTGGTGTGTCTCATTTCAAGAGAATGAGACACACCAGTGTAGCCTTTTTTTGct  
cgagctggcgaattcc  
>CD\_NM\_020070.2:510  
CgCtGcgagtctGGtatGCACACTGGTGTGTCTCATGAATTTCAAGAGAATTCATGAGACACACCAGTGTATTTTTGct  
cgagctggcgaattcc  
>CD\_NM\_020070.2:236  
CgCtGcgagtctGGtatGACCCAACAGCTGCATCGCAGAGTTCAAGAGACTCTGCGATGCAGCTGTTGGCCTTTTTGct  
cgagctggcgaattcc  
>CD\_NM\_020070.2:376  
CgCtGcgagtctGGtatGCTTCAATCCAAGCATAACTCAGTTCAAGAGACTGAGTTATGCTTGGATTGAAATTTTTGct  
cgagctggcgaattcc  
>CD\_NM\_020070.2:609  
CgCtGcgagtctGGtatGACCCTCCAAACAGAGCAACAACCTTCAAGAGAGTTGTTGCTCTGTTTGGAGGGCTTTTTGct  
cgagctggcgaattcc  
>CD\_NM\_020070.2:461  
CgCtGcgagtctGGtatGAGGTCACTCTGTTCCCGCCGTCTTCAAGAGAGACGGCGGGAACAGAGTGACCGTTTTTTGct  
cgagctggcgaattcc  
>CD\_NM\_020070.2:515  
CgCtGcgagtctGGtatGCGGTGTGTCTCATGAATGACTTTTTCAAGAGAAAGTCATTCATGAGACACACCATTTTTGct  
cgagctggcgaattcc  
>CD\_NM\_020070.2:611  
CgCtGcgagtctGGtatGACTCCAAACAGAGCAACAACAATTTCAAGAGATTGTTGTTGCTCTGTTTGGAGTTTTTTGct  
cgagctggcgaattcc  
>CD\_NM\_020070.2:287  
CgCtGcgagtctGGtatGAAAGCAGCCGGTCCAGCTGAGTTCAAGAGACTCAGGCTGGACCGCTGCTTCTTTTTGct  
cgagctggcgaattcc  
>CD\_NM\_020070.2:713  
CgCtGcgagtctGGtatGCAGGGAGCACCGTGGAGAAGACTTCAAGAGAGTCTTCTCCACGGTGCTCCCTTTTTTTGct  
cgagctggcgaattcc  
>CD\_NM\_020070.2:557  
CgCtGcgagtctGGtatGCGACCTGGAAGGCAGATGGTACTTCAAGAGAGTACCATCTGCCTTCCAGGTCATTTTTTGct  
cgagctggcgaattcc  
>CD\_NM\_020070.2:615  
CgCtGcgagtctGGtatGAAAACAGAGCAACAACAAGTACTTCAAGAGAGTACTTGTGTTGCTCTGTTTGTTTTTGct  
cgagctggcgaattcc  
>CD\_NM\_020070.2:672  
CgCtGcgagtctGGtatGATGGAGGTCCCGCAGAAGCTACTTCAAGAGAGTAGCTTCTGCGGGACCTCCACTTTTTGct  
cgagctggcgaattcc  
>CD\_NM\_005582:1324  
CgCtGcgagtctGGtatGACTGTCCCACTTGCAAACCTTATTCAAGAGATAAGTTTTGCAAGTGGGACAGTTTTTTGct  
cgagctggcgaattcc  
>CD\_NM\_005582:1877  
CgCtGcgagtctGGtatGATGGACTGCACTTGCTCGAATATTCAAGAGATATTCGAGCAAGTGCAGTCCAGTTTTTTGct  
cgagctggcgaattcc  
>CD\_NM\_005582:1095



CgCctGcgagtctGGtatGCGGGTCTGAACTTGCTCAAGAATTCAAGAGATTCTTGAGCAAGTTCAGACCCTTTTTTgct  
cgagctggcgaattcc  
>CD\_NM\_005582:1850  
CgCctGcgagtctGGtatGCGCACCATTAATTTAAGTCATATTTCAAGAGATATGACTTAAATTAATGGTGCTTTTTTgct  
cgagctggcgaattcc  
>CD\_NM\_005582:452  
CgCctGcgagtctGGtatGCGCACACTTGTGTTAACTGGAATTTCAAGAGATTCCAGTTAACACAAGTGTGCTTTTTTgct  
cgagctggcgaattcc  
>CD\_NM\_005582:1299  
CgCctGcgagtctGGtatGCCTGCTGCAGTCTGCAACTCAATTTCAAGAGATTGAGTTGCAGACTGCAGCAGTTTTTgct  
cgagctggcgaattcc  
>CD\_NM\_005582.1:1387  
CgCctGcgagtctGGtatGCTCAAAGAAATGTCCTCAGCTAGTTCAAGAGACTAGCTGAGGACATTCTTTGAATTTTTgct  
cgagctggcgaattcc  
>CD\_NM\_005582.1:1095  
CgCctGcgagtctGGtatGAGGTCTGAACTTGCTCAAGAAATTTCAAGAGATTTCTTGAGCAAGTTCAGACCCTTTTTgct  
cgagctggcgaattcc  
>CD\_NM\_005582.1:1054  
CgCctGcgagtctGGtatGATGACAGCAACTCACTTGAAAGTTCAAGAGACTTTCAAGTGAGTTGCTGTCAGTTTTTgct  
cgagctggcgaattcc  
>CD\_NM\_005582.1:1362  
CgCctGcgagtctGGtatGACCTCTTGGTCTCCAGAGTCAGTTCAAGAGACTGACTCTGGAGACCAAGAGGCTTTTTTgct  
cgagctggcgaattcc  
>CD\_NM\_005582.1:654  
CgCctGcgagtctGGtatGCGCACGGAATCTGAAAGTACTGTTCAAGAGACAGTACTTTTCAGATTCCGTGCTTTTTTgct  
cgagctggcgaattcc  
>CD\_NM\_005582.1:1877  
CgCctGcgagtctGGtatGCGGACTGCACTTGCTCGAATATTTCAAGAGAATATTCGAGCAAGTGCAGTCCATTTTTgct  
cgagctggcgaattcc  
>CD\_NM\_005582.1:1123  
CgCctGcgagtctGGtatGATCAGTGTAATCATTTTCGATCTTTCAAGAGAGATCGAAATGATTTACACTGAGTTTTTgct  
cgagctggcgaattcc  
>CD\_NM\_005582.1:762  
CgCctGcgagtctGGtatGCGGCAATAATGTTAAAGGTATTTTTCAAGAGAAATACCTTTAACATTATTGCCATTTTTgct  
cgagctggcgaattcc  
>CD\_NM\_005582.1:881  
CgCctGcgagtctGGtatGATCAGTCTCTCTGGCTGGGAACTTTCAAGAGAGTTCAGCCAGAGAGACTGAGTTTTTgct  
cgagctggcgaattcc  
>CD\_NM\_005582.1:747  
CgCctGcgagtctGGtatGCAGCCTGAACTTCAATGGCAATTTCAAGAGAATTGCCATTGAAGTTCAGGCTTTTTTgct  
cgagctggcgaattcc  
>CD\_NM\_005582.1:991  
CgCctGcgagtctGGtatGAACCGCTTCTCTGACATCTCATTTCAAGAGAATGAGATGTCAGAGAAGCGGTGTTTTTgct  
cgagctggcgaattcc  
>CD\_NM\_005582.1:972  
CgCctGcgagtctGGtatGAAGCCTCAACCTGCAGGAACACTTTCAAGAGAGTGTTCCTGCAGGTTGAGGCTTTTTTgct  
cgagctggcgaattcc  
>CD\_NM\_005582.1:946  
CgCctGcgagtctGGtatGCAGGGACTCTGTGAAATGTCTGTTCAAGAGACAGACATTTACAGAGTCCCTTTTTTgct  
cgagctggcgaattcc  
>CD\_NM\_005582.1:1299  
CgCctGcgagtctGGtatGATGCTGCAGTCTGCAACTCAATTTCAAGAGATTTGAGTTGCAGACTGCAGCAGTTTTTgct  
cgagctggcgaattcc  
>CD\_NM\_005582.1:284

CgCtGcgagtctGGtatGATGACACTCTACCAAACACAACCTCAAGAGAGTTGTGTTTGGTAGAGTGCAGTTTTTGGct  
cgagctggcgaattcc  
>CD\_NM\_005582.1:1747  
CgCtGcgagtctGGtatGCGCATTGATTCTCTTAGCCATCTTCAAGAGAGATGGCTAAGAGAATCAATGCTTTTTTGGct  
cgagctggcgaattcc  
>CD\_NM\_005582.1:389  
CgCtGcgagtctGGtatGCTTTAACTAGGTGCCAGATTAATTC AAGAGATTAATCTGGCACCTAGTTAAATTTTTTGGct  
cgagctggcgaattcc  
>CD\_NM\_005582.1:1447  
CgCtGcgagtctGGtatGACTCCACAAAGTCCCTTCCAAATTC AAGAGATTTGGAAGGGACTTTGTGGAGCTTTTTTGGct  
cgagctggcgaattcc  
>CD\_NM\_005582.1:1324  
CgCtGcgagtctGGtatGATGTCCACTTGCAAACCTTAATTC AAGAGATTAAGGTTTGCAAGTGGGACAGTTTTTGGct  
cgagctggcgaattcc  
>CD\_NM\_005582.1:1888  
CgCtGcgagtctGGtatGCGCTCGAATATTCATTTCTTAATTC AAGAGATTAAGAAATGAATATTCGAGCATTTTTTGGct  
cgagctggcgaattcc  
>CD\_NM\_005582.1:597  
CgCtGcgagtctGGtatGCAGCTTGTATCTTGAAGCAACTTC AAGAGAGTTGCTTCCAAGATACAAGCTTTTTTGGct  
cgagctggcgaattcc  
>CD\_NM\_005582.1:1039  
CgCtGcgagtctGGtatGATCCAAGAATTGGATCTGACAGTTCA AAGAGACTGTCAGATCCAATTCCTGGAGTTTTTGGct  
cgagctggcgaattcc  
>CD\_NM\_005582.1:885  
CgCtGcgagtctGGtatGATCTCTCTGGCTGGGAACATTTTTT CAAGAGAAAATGTTCCCAGCCAGAGAGACTTTTTTGGct  
cgagctggcgaattcc  
>CD\_NM\_005582.1:1844  
CgCtGcgagtctGGtatGCGCAGAGCACCATTAATTTAAGTTCA AAGAGACTTAAATTAATGGTGCTCTGCTTTTTTGGct  
cgagctggcgaattcc  
>CD\_NM\_005582.1:1111  
CgCtGcgagtctGGtatGCAGAAATTAGTTCTCAGTGTAATTC AAGAGATTACACTGAGAACTAATTTCTTTTTTGGct  
cgagctggcgaattcc  
>CD\_NM\_005582.1:1653  
CgCtGcgagtctGGtatGATCTTGTGGTCTCCTCTCTATATTC AAGAGATATAGAGAGGAGACCACAAGAGTTTTTGGct  
cgagctggcgaattcc  
>CD\_NM\_005582.1:1260  
CgCtGcgagtctGGtatGAACACTTGATTTAAGCCATAATTTCA AAGAGAATTATGGCTTAAATCAAGTGTCTTTTTTGGct  
cgagctggcgaattcc  
>CD\_NM\_000634:565  
CgCtGcgagtctGGtatGCGCGTCACTTGGTCAAGTTTGTTC AAGAGAACAACTTGACCAAGTGACGCTTTTTTGGct  
cgagctggcgaattcc  
>CD\_NM\_000634:831  
CgCtGcgagtctGGtatGAACCGAGCCATGAGGGTCATCTTTCA AAGAGAAGATGACCCTCATGGCTCGGTGTTTTTGGct  
cgagctggcgaattcc  
>CD\_NM\_000634.2:217  
CgCtGcgagtctGGtatGCACTGAGACACTCAACAAGTATTTCA AAGAGAATACTTGTGAGTGTCTCAGTTTTTTGGct  
cgagctggcgaattcc  
>CD\_NM\_000634.2:1144  
CgCtGcgagtctGGtatGATCTGTCAATGTCTCTTCCAACCTTC AAGAGAGTTGGAAGAGACATTGACAGACTTTTTTGGct  
cgagctggcgaattcc  
>CD\_NM\_000634.2:676  
CgCtGcgagtctGGtatGCTGCTATGAGGTCTGGGAAATTTCA AAGAGAATTTCCAGGACCTCATAGCAATTTTTTGGct  
cgagctggcgaattcc  
>CD\_NM\_000634.2:300

CgCtGcgagtctGGtatGCGCTGGTCATCTTATACAGCAGTTCAAGAGACTGCTGTATAAGATGACCAGCATTGct  
cgagctggcgaattcc  
>CD\_NM\_000634.2:268  
CgCtGcgagtctGGtatGACTGCTGAGCCTGCTGGGAACTTCAAGAGAGTTCCAGCAGGCTCAGCAGTTGct  
cgagctggcgaattcc  
>CD\_NM\_000634.2:757  
CgCtGcgagtctGGtatGACCGCTGTTGTCATGCTGTTCTTCAAGAGAGAACAGCATGACAAACAGCGCTTTGct  
cgagctggcgaattcc  
>CD\_NM\_000634.2:505  
CgCtGcgagtctGGtatGATGCATCAGTGTGGACCGTTACTTCAAGAGAGTAACGGTCCACACTGATGCAGTTGct  
cgagctggcgaattcc  
>CD\_NM\_000634.2:279  
CgCtGcgagtctGGtatGCGCTGGGAACTCCCTGGTGATTTCAAGAGAATCACCAGGGAGTTCCAGCATTGct  
cgagctggcgaattcc  
>CD\_NM\_000634.2:644  
CgCtGcgagtctGGtatGAAGGCTTACCATCCAAACAATTTCAAGAGAAATTGTTGGATGGTAAGCCTGTTGct  
cgagctggcgaattcc  
>CD\_NM\_000634.2:544  
CgCtGcgagtctGGtatGAACACGCACACTGACCCAGAAGTTCAAGAGACTTCTGGGTGAGTGTGCGTGTGct  
cgagctggcgaattcc  
>CD\_NM\_000634.2:763  
CgCtGcgagtctGGtatGATTTGTCATGCTGTTCTGCTATTTCAAGAGAATAGCAGAACAGCATGACAACTTTGct  
cgagctggcgaattcc  
>CD\_NM\_000634.2:1063  
CgCtGcgagtctGGtatGCTTCCCTCAAGATCCTGGCTATGTTCAAGAGACATAGCCAGGATCTTGAGGAATTTGct  
cgagctggcgaattcc  
>CD\_NM\_000634.2:173  
CgCtGcgagtctGGtatGAGCATGCCACCTGCAGATGAAGTTCAAGAGACTTCATCTGCAGGTGGCATGCCTTTGct  
cgagctggcgaattcc  
>CD\_NM\_000634.2:985  
CgCtGcgagtctGGtatGAACTGAGATTCTGGGATTTCTCTTCAAGAGAGAGAAATCCCAGAATCTCAGTGTGct  
cgagctggcgaattcc  
>CD\_NM\_000634.2:1081  
CgCtGcgagtctGGtatGCATGCATGGCCTGGTCAGCAAGTTCAAGAGACTTGCTGACCAGGCCATGCATATTTGct  
cgagctggcgaattcc  
>CD\_NM\_000634.2:1114  
CgCtGcgagtctGGtatGCCGTCATCGTGTACCTCCTACTTCAAGAGAGTAGGAGGTAACACGATGACGTTTTGct  
cgagctggcgaattcc  
>CD\_NM\_000634.2:451  
CgCtGcgagtctGGtatGAGTGGTCTCACTCCTGAAGGAATTCAAGAGATTCCTTCAGGAGTGAGACCCTTTGct  
cgagctggcgaattcc  
>CD\_NM\_000634.2:681  
CgCtGcgagtctGGtatGCTGAGGTCTGGGAAATGACACTTCAAGAGAGTGTCAATTTCCAGGACCTCATTTGct  
cgagctggcgaattcc  
>CD\_NM\_000634.2:1054  
CgCtGcgagtctGGtatGCCGCCATGGATTCCTCAAGATCTTCAAGAGAGATCTTGAGGAATCCATGGCGATTTGct  
cgagctggcgaattcc  
>CD\_NM\_000634.2:255  
CgCtGcgagtctGGtatGCTGCCCTAGTGTCTGCTGAGTTCAAGAGACTCAGCAGGAACACTAGGGCATTGct  
cgagctggcgaattcc  
>CD\_NM\_000634.2:565  
CgCtGcgagtctGGtatGACGTCACCTGGTCAAGTTGTTTTCAAGAGAAACAACTTGACCAAGTGACGTTTTGct  
cgagctggcgaattcc  
>CD\_NM\_000634.2:1127

CgCctGcgagtctGGtatGCCCTCCTACACTTCTTCGTCTGTTCAAGAGACAGACGAAGAAGTGTAGGAGGTTTTTTGct  
cgagctggcgaattcc  
>CD\_NM\_000634.2:1119  
CgCctGcgagtctGGtatGCTCGTGTACCTCCTACACTTCTTCAAGAGAGAAGTGTAGGAGGTAACACGATTTTTTTGct  
cgagctggcgaattcc  
>CD\_NM\_000634.2:858  
CgCctGcgagtctGGtatGCCGTCTCATCTTCTGCTTTGTTCAAGAGACAAAGCAGGAAGATGAGGACGATTTTTTTGct  
cgagctggcgaattcc  
>CD\_NM\_000634.2:640  
CgCctGcgagtctGGtatGACGCCAGGCTTACCATCCAACTTCAAGAGAGTTTGGATGGTAAGCCTGGCGGTTTTTTGct  
cgagctggcgaattcc  
>CD\_NM\_000634.2:492  
CgCctGcgagtctGGtatGCCCTGCTGTTGGCCTGCATCAGTTCAAGAGACTGATGCAGGCCAACAGCAGGATTTTTTTGct  
cgagctggcgaattcc  
>CD\_NM\_000634.2:130  
CgCctGcgagtctGGtatGCACAGATCCACAGATGTGGGATTTCAAGAGAATCCCACATCTGTGGATCTGTATTTTTTTGct  
cgagctggcgaattcc  
>CD\_NM\_000634.2:295  
CgCctGcgagtctGGtatGAGTGATGCTGGTCATCTTATACTTCAAGAGAGTATAAGATGACCAGCATCACTTTTTTGct  
cgagctggcgaattcc  
>CD\_NM\_000634.2:463  
CgCctGcgagtctGGtatGACTGAAGGAAGTCAACTTCTACTTCAAGAGAGTAGAAGTTGACTTCCCTCAGGTTTTTTGct  
cgagctggcgaattcc  
>CD\_NM\_000634.2:983  
CgCctGcgagtctGGtatGACCACTGAGATTCCTGGGATTTCTTCAAGAGAGAAATCCCAGAATCTCAGTGGCTTTTTTTGct  
cgagctggcgaattcc  
>CD\_NM\_000634.2:550  
CgCctGcgagtctGGtatGAACACTGACCCAGAAGCGTCACTTCAAGAGAGTGACGCTTCTGGGTCAGTGTTTTTTTGct  
cgagctggcgaattcc  
>CD\_NM\_001557:874  
CgCctGcgagtctGGtatGCCCCAGAAGCGCTACTTGGTCATTTCAAGAGATGACCAAGTAGCGCTTCTGGGTTTTTTGct  
cgagctggcgaattcc  
>CD\_NM\_001557:881  
CgCctGcgagtctGGtatGCGCGCTACTTGGTCAAATTCATTTCAAGAGAATGAATTTGACCAAGTAGCGCTTTTTTTGct  
cgagctggcgaattcc  
>CD\_NM\_001557:963  
CgCctGcgagtctGGtatGAACCGTCTACTCATCCAATGTTTTCAAGAGAAACATTTGGATGAGTAGACGGTCTTTTTTTGct  
cgagctggcgaattcc  
>CD\_NM\_001557:1147  
CgCctGcgagtctGGtatGAACCGGGCCATGCGGGTCATCTTTCAAGAGAAGATGACCCGCATGGCCCGGTGTTTTTTGct  
cgagctggcgaattcc  
>CD\_NM\_001557:1348  
CgCctGcgagtctGGtatGCACGCCTTCATTTGGCCAGAAGTTTCAAGAGAACTTCTGGCCAATGAAGGCGTATTTTTTTGct  
cgagctggcgaattcc  
>CD\_NM\_001557:1440  
CgCctGcgagtctGGtatGAAGGCCTTCTTTGTTGGCTCTTTCAAGAGAAGAGCCAACAAAGGAAGGCCTGTTTTTTGct  
cgagctggcgaattcc  
>CD\_NM\_001557:880  
CgCctGcgagtctGGtatGCAGCGCTACTTGGTCAAATTCATTTCAAGAGATGAATTTGACCAAGTAGCGCTTTTTTTGct  
cgagctggcgaattcc  
>CD\_NM\_001557.2:616  
CgCctGcgagtctGGtatGCGCTGGTCATCTTATACAGCAGTTCAAGAGACTGCTGTATAAGATGACCAGCATTTTTTTGct  
cgagctggcgaattcc  
>CD\_NM\_001557.2:584

CgCctGcgagtctGGtatGACTGCTGAGCCTGCTGGGAAACTTCAAGAGAGTTTCCCAGCAGGCTCAGCAGGTTTTTgct  
cgagctggcgaattcc  
>CD\_NM\_001557.2:533  
CgCctGcgagtctGGtatGCTCCCTGGAAATCAACAAGTATTTCAAGAGAATACTTGTGATTTCCAGGGATTTTTTgct  
cgagctggcgaattcc  
>CD\_NM\_001557.2:821  
CgCctGcgagtctGGtatGATGCATCAGTGTGGACCGTTACTTCAAGAGAGTAACGGTCCACACTGATGCAGTTTTTgct  
cgagctggcgaattcc  
>CD\_NM\_001557.2:455  
CgCctGcgagtctGGtatGCGGTGAAGATCTTAGTAATTACTTCAAGAGAGTAATTACTAAGATCTTCACCTTTTTTgct  
cgagctggcgaattcc  
>CD\_NM\_001557.2:527  
CgCctGcgagtctGGtatGCCAGAATCCCTGGAAATCAACTTCAAGAGAGTTGATTTCCAGGGATTCTGGTTTTTgct  
cgagctggcgaattcc  
>CD\_NM\_001557.2:1106  
CgCctGcgagtctGGtatGAACCCTGCGTACGCTGTTTAAGTTCAAGAGACTTAAACAGCGTACGCAGGGTGTTTTTGct  
cgagctggcgaattcc  
>CD\_NM\_001557.2:1397  
CgCctGcgagtctGGtatGCATACATGGCTTGATCAGCAAGTTCAAGAGACTTGCTGATCAAGCCATGTATTTTTTgct  
cgagctggcgaattcc  
>CD\_NM\_001557.2:1370  
CgCctGcgagtctGGtatGCCGCCATGGACTCCTCAAGATTTTTCAAGAGAAATCTTGAGGAGTCCATGGCGATTTTTTgct  
cgagctggcgaattcc  
>CD\_NM\_001557.2:808  
CgCctGcgagtctGGtatGCCCTGCTACTGGCCTGCATCAGTTCAAGAGACTGATGCAGGCCAGTAGCAGGATTTTTTgct  
cgagctggcgaattcc  
>CD\_NM\_001557.2:595  
CgCctGcgagtctGGtatGCGCTGGGAAACTCCCTCGTGATTTCAAGAGAATCACGAGGGAGTTTCCCAGCATTTTTTgct  
cgagctggcgaattcc  
>CD\_NM\_001557.2:1470  
CgCctGcgagtctGGtatGAACACTTCCACTACTCTCTAAGTTCAAGAGACTTAGAGAGTAGTGGAAGTGTTTTTTgct  
cgagctggcgaattcc  
>CD\_NM\_001557.2:969  
CgCctGcgagtctGGtatGCACTCATCCAATGTTAGCCCAGTTCAAGAGACTGGGCTAACATTGGATGAGTATTTTTTgct  
cgagctggcgaattcc  
>CD\_NM\_001557.2:860  
CgCctGcgagtctGGtatGAACACGCACACTGACCCAGAAGTTCAAGAGACTTCTGGGTGAGTGTGCGTGTTTTTTgct  
cgagctggcgaattcc  
>CD\_NM\_001557.2:1417  
CgCctGcgagtctGGtatGCGGACTCCCTGCCCAAAGACAGTTCAAGAGACTGTCTTTGGGCAGGGAGTCCTTTTTTgct  
cgagctggcgaattcc  
>CD\_NM\_001557.2:1379  
CgCctGcgagtctGGtatGCCTCCTCAAGATTCTAGCTATATTCAAGAGATATAGCTAGAATCTTGAGGAGTTTTTgct  
cgagctggcgaattcc  
>CD\_NM\_001557.2:767  
CgCctGcgagtctGGtatGAGTGGTCTCACTCCTGAAGGAATTCAAGAGATTCTTCAGGAGTGAGACCACCTTTTTTgct  
cgagctggcgaattcc  
>CD\_NM\_001557.2:887  
CgCctGcgagtctGGtatGATTGGTCAAATTCATATGTCTCTTCAAGAGAGACATATGAATTTGACCAAGTTTTTgct  
cgagctggcgaattcc  
>CD\_NM\_001557.2:997  
CgCctGcgagtctGGtatGCTGAGGACATGGGCAACAATACTTCAAGAGAGTATTGTTGCCCATGTCCCTATTTTTTgct  
cgagctggcgaattcc  
>CD\_NM\_001557.2:866

CgCctGcgagtctGGtatGAACACTGACCCAGAAGCGCTACTTCAAGAGAGTAGCGCTTCTGGGTCAGTGTGTTTTTGct  
cgagctggcgaattcc  
>CD\_NM\_001557.2:1067  
CgCctGcgagtctGGtatGAATCGTGCCACTGCTGATCATGTTCAAGAGACATGATCAGCAGTGGCACGATGTTTTTGct  
cgagctggcgaattcc  
>CD\_NM\_001557.2:1073  
CgCctGcgagtctGGtatGACCACTGCTGATCATGCTGTTCTTCAAGAGAGAACAGCATGATCAGCAGTGGCTTTTTTGct  
cgagctggcgaattcc  
>CD\_NM\_001557.2:435  
CgCctGcgagtctGGtatGCGCTTTGAAGATTTCTGGAAAGTTCAAGAGACTTTCAGAAATCTTCAAAGCTTTTTTGct  
cgagctggcgaattcc  
>CD\_NM\_001557.2:1440  
CgCctGcgagtctGGtatGCGGCCTTCTTTGTTGGCTCTTTTTCAAGAGAAAGAGCCAACAAAGGAAGGCCTTTTTGct  
cgagctggcgaattcc  
>CD\_NM\_001557.2:964  
CgCctGcgagtctGGtatGACGTCTACTCATCCAATGTTAGTTCAAGAGACTAACATTGGATGAGTAGACGGTTTTTGct  
cgagctggcgaattcc  
>CD\_NM\_001557.2:428  
CgCctGcgagtctGGtatGAAGTGACAGCTTTGAAGATTTCTTCAAGAGAGAAATCTTCAAAGCTGTCACTTTTTTGct  
cgagctggcgaattcc  
>CD\_NM\_001504:195  
CgCctGcgagtctGGtatGCGCCACAGGACTTCAGCCTGATTCAAGAGATCAGGCTGAAGTCTGTGGGCATTTTTTGct  
cgagctggcgaattcc  
>CD\_NM\_001504:453  
CgCctGcgagtctGGtatGACCCTCTTCAACATCAACTTCTTTCAAGAGAAGAAGTTGATGTTGAAGAGGGCTTTTTTGct  
cgagctggcgaattcc  
>CD\_NM\_001504:663  
CgCctGcgagtctGGtatGCACGCCACCCACTGCCAATACATTCAAGAGATGTATTGGCAGTGGGTGGCGTTTTTTTGct  
cgagctggcgaattcc  
>CD\_NM\_001504:750  
CgCctGcgagtctGGtatGATGCTGGTCATGGCCTACTGCTTTCAAGAGAAGCAGTAGGCCATGACCAGCAGTTTTTGct  
cgagctggcgaattcc  
>CD\_NM\_001504:926  
CgCctGcgagtctGGtatGAGCCCGCAACTGTGGCCGAGAATTCAAGAGATTCTCGGCCACAGTTGCGGGCCTTTTTTGct  
cgagctggcgaattcc  
>CD\_NM\_001504.1:162  
CgCctGcgagtctGGtatGCCGAGAGTGACTCGTGTGCTGACTTCAAGAGAGTACAGCACGAGTCACTCTCGTTTTTTTGct  
cgagctggcgaattcc  
>CD\_NM\_001504.1:137  
CgCctGcgagtctGGtatGCGCTCTTCTTATGACTATGGAGTTCAAGAGACTCCATAGTCATAGGAAGAGCTTTTTTGct  
cgagctggcgaattcc  
>CD\_NM\_001504.1:987  
CgCctGcgagtctGGtatGACTACATGCACTGCTGCCTCAATTCAAGAGATTGAGGCAGCAGTGCATGTAGCTTTTTTGct  
cgagctggcgaattcc  
>CD\_NM\_001504.1:85  
CgCctGcgagtctGGtatGCGACCACCAAGTGCTAAATGACTTCAAGAGAGTCATTTAGCACTTGGTGGTCATTTTTTGct  
cgagctggcgaattcc  
>CD\_NM\_001504.1:1000  
CgCctGcgagtctGGtatGATGCCTCAACCCGCTGCTCTATTTCAAGAGAATAGAGCAGCGGGTTGAGGCAGTTTTTGct  
cgagctggcgaattcc  
>CD\_NM\_001504.1:196  
CgCctGcgagtctGGtatGACCACAGGACTTCAGCCTGAACTTCAAGAGAGTTCAGGCTGAAGTCTGTGGGTTTTTGct  
cgagctggcgaattcc  
>CD\_NM\_001504.1:663

CgCctGcgagtctGGtatGCCGCCACCCACTGCCAATACAATTCAAGAGATTGTATTGGCAGTGGGTGGCGTTTTTTGct  
cgagctggcgaattcc  
>CD\_NM\_001504.1:358  
CgCctGcgagtctGGtatGCGCAGACACGCTGCTGGTGTCTGTTCAAGAGACAGCACCAGCAGCGTGTCTGCTTTTTTTGct  
cgagctggcgaattcc  
>CD\_NM\_001504.1:328  
CgCctGcgagtctGGtatGAACCGACACCTTCCCTGCTCCACTTCAAGAGAGTGGAGCAGGAAGGTGTCGGTGTTTTTTGct  
cgagctggcgaattcc  
>CD\_NM\_001504.1:483  
CgCctGcgagtctGGtatGACCTCCTGCTGGCCTGCATCAGTTCAAGAGACTGATGCAGGCCAGCAGGAGGGTTTTTTGct  
cgagctggcgaattcc  
>CD\_NM\_001504.1:112  
CgCctGcgagtctGGtatGAGTTGCCGCCCTCCTGGAGAACTTCAAGAGAGTTCTCCAGGAGGGCGGCAACCTTTTTTGct  
cgagctggcgaattcc  
>CD\_NM\_001504.1:1125  
CgCctGcgagtctGGtatGAGGATTCATCCTGGTCTGAGACTTCAAGAGAGTCTCAGACCAGGATGAATCCCTTTTTTGct  
cgagctggcgaattcc  
>CD\_NM\_001504.1:445  
CgCctGcgagtctGGtatGAGCAGGTGCCCTCTTCAACATCTTCAAGAGAGATGTTGAAGAGGGCACCTGCCTTTTTTGct  
cgagctggcgaattcc  
>CD\_NM\_001504.1:454  
CgCctGcgagtctGGtatGACTCTTCAACATCAACTTCTACTTCAAGAGAGTAGAAGTTGATGTTGAAGAGGTTTTTTGct  
cgagctggcgaattcc  
>CD\_NM\_001504.1:421  
CgCctGcgagtctGGtatGATTTGGCTCTGGCCTCTGCAAATTCAGAGATTTGCAGAGGCCAGAGCCAAAGTTTTTTGct  
cgagctggcgaattcc  
>CD\_NM\_001504.1:1154  
CgCctGcgagtctGGtatGACCTCCTACTCGGGCTTGTGAGTTCAAGAGACTCACAAGCCGAGTAGGAGGCTTTTTTGct  
cgagctggcgaattcc  
>CD\_NM\_001504.1:448  
CgCctGcgagtctGGtatGCGGTGCCCTCTTCAACATCAACTTCAAGAGAGTTGATGTTGAAGAGGGCACCTTTTTTTGct  
cgagctggcgaattcc  
>CD\_NM\_001504.1:892  
CgCctGcgagtctGGtatGACTGGTGGACATCCTCATGGACTTCAAGAGAGTCCATGAGGATGTCCACCAGCTTTTTTTGct  
cgagctggcgaattcc  
>CD\_NM\_001504.1:70  
CgCctGcgagtctGGtatGAGTCCTTGAGGTGAGTGACCACTTCAAGAGAGTGGTCACTCACCTCAAGGACCTTTTTTTGct  
cgagctggcgaattcc  
>CD\_NM\_001504.1:80  
CgCctGcgagtctGGtatGATGAGTGACCACCAAGTGCTAATTCAAGAGATTAGCACTTGGTGGTCACTCACTTTTTTTGct  
cgagctggcgaattcc  
>CD\_NM\_001504.1:1010  
CgCctGcgagtctGGtatGACGCTGCTCTATGCCTTTGTAGTTCAAGAGACTACAAAGGCATAGAGCAGCGTTTTTTGct  
cgagctggcgaattcc  
>CD\_NM\_001504.1:134  
CgCctGcgagtctGGtatGCTCAGCTCTTCCATGACTATGTTCAAGAGACATAGTCATAGGAAGAGCTGAATTTTTTGct  
cgagctggcgaattcc  
>CD\_NM\_001504.1:706  
CgCctGcgagtctGGtatGAGCTCTGCGGGTGTGCGAGCTGTTCAAGAGACAGCTGCAGCACCCGCAGAGCCTTTTTTTGct  
cgagctggcgaattcc  
>CD\_NM\_001504.1:750  
CgCctGcgagtctGGtatGCGCTGGTCATGGCCTACTGCTATTCAAGAGATAGCAGTAGGCCATGACCAGCATTTTTTTGct  
cgagctggcgaattcc  
>CD\_NM\_001504.1:926

CgCctGcgagtctGGtatGACCCGCAACTGTGGCCGAGAAATTCAAGAGATTTCTCGGCCACAGTTGCGGGCTTTTTGct  
cgagctggcgaattcc  
>CD\_NM\_001504.1:139  
CgCctGcgagtctGGtatGATCTTCTTATGACTATGGAGAATTCAAGAGATTTCTCCATAGTCATAGGAAGAGTTTTGct  
cgagctggcgaattcc  
>CD\_NM\_001504.1:364  
CgCctGcgagtctGGtatGAACGCTGCTGGTGTGACACTGTTCAAGAGACAGTGTGTCAGCACCAGCAGCGTGTGTTTTGct  
cgagctggcgaattcc  
>CD\_NM\_001504.1:1098  
CgCctGcgagtctGGtatGCCAGAGGCAGCCATCGTCTTCTTCAAGAGAGAAGACGATGGCTGCCTCTGGATTTTTGct  
cgagctggcgaattcc  
>CD\_NM\_003467:494  
CgCctGcgagtctGGtatGCTCCTGGTCATGGGTTACCAGATTCAAGAGATCTGGTAACCCATGACCAGGATTTTTGct  
cgagctggcgaattcc  
>CD\_NM\_003467:920  
CgCctGcgagtctGGtatGAAGCACATCATGGTTGGCCTTATTCAAGAGATAAGGCCAACCATGATGTGCTGTGTTTTGct  
cgagctggcgaattcc  
>CD\_NM\_003467:1022  
CgCctGcgagtctGGtatGCAGGCCCTCAAGACCACAGTCATTCAAGAGATGACTGTGGTCTTGAGGGCCTTTTTGct  
cgagctggcgaattcc  
>CD\_NM\_001008540.1:1336  
CgCctGcgagtctGGtatGCCACTGAGTCTGAGTCTTCAATTCAAGAGATTGAAGACTCAGACTCAGTGGATTTTTGct  
cgagctggcgaattcc  
>CD\_NM\_001008540.1:953  
CgCctGcgagtctGGtatGCTGTTCATCCTGTCTGCTATTGTTCAAGAGACAATAGCAGGACAGGATGACAATTTTTGct  
cgagctggcgaattcc  
>CD\_NM\_001008540.1:597  
CgCctGcgagtctGGtatGAGCAGTTGATGCCGTGGCAAACCTTCAAGAGAGTTTGCCACGGCATCAACTGCCTTTTTGct  
cgagctggcgaattcc  
>CD\_NM\_001008540.1:1287  
CgCctGcgagtctGGtatGAAGCCTCAAGATCCTCTCCAAATTCAAGAGATTTGGAGAGGATCTTGAGGCTGTGTTTTGct  
cgagctggcgaattcc  
>CD\_NM\_001008540.1:686  
CgCctGcgagtctGGtatGCCCTCATCCTGGCCTTCATCAGTTCAAGAGACTGATGAAGGCCAGGATGAGGATTTTTGct  
cgagctggcgaattcc  
>CD\_NM\_001008540.1:326  
CgCctGcgagtctGGtatGCGCAGATATACACTTCAGATAAATTCAAGAGATTATCTGAAGTGTATATCTGCATTTTTGct  
cgagctggcgaattcc  
>CD\_NM\_001008540.1:1292  
CgCctGcgagtctGGtatGCCAAGATCCTCTCCAAAGGAAATTCAAGAGATTTCTTTGGAGAGGATCTTGATTTTTGct  
cgagctggcgaattcc  
>CD\_NM\_001008540.1:822  
CgCctGcgagtctGGtatGCCCCGACTTCATCTTTGCCAACTTCAAGAGAGTTGGCAAAGATGAAGTCGGGATTTTTGct  
cgagctggcgaattcc  
>CD\_NM\_001008540.1:624  
CgCctGcgagtctGGtatGATTTGGGAACTTCCTATGCAAGTTCAAGAGACTTGCATAGGAAGTTCCCAAAGTTTTGct  
cgagctggcgaattcc  
>CD\_NM\_001008540.1:1340  
CgCctGcgagtctGGtatGATGAGTCTGAGTCTTCAAGTTTTTCAAGAGAAAACCTGAAGACTCAGACTCAGTTTTGct  
cgagctggcgaattcc  
>CD\_NM\_001008540.1:494  
CgCctGcgagtctGGtatGCCCTGGTCATGGGTTACCAGAATTCAAGAGATTTCTGGTAACCCATGACCAGGATTTTTGct  
cgagctggcgaattcc  
>CD\_NM\_001008540.1:753



CgCtGcgagtctGGtatGACCAAGGAAGCTGTTGGCTGAATTCAAGAGATTCAGCCAACAGCTTCCTTGGCTTTTTGct  
cgagctggcgaattcc  
>CD\_NM\_001008540.1:446  
CgCtGcgagtctGGtatGCCTACTCCATCATCTTCTTAAGAGATTAAGAAGATGATGGAGTAGATTTTTGct  
cgagctggcgaattcc  
>CD\_NM\_001008540.1:437  
CgCtGcgagtctGGtatGCGCCACCATCTACTCCATCATTTCAAGAGAATGATGGAGTAGATGGTGGGCATTTTTGct  
cgagctggcgaattcc  
>CD\_NM\_001008540.1:844  
CgCtGcgagtctGGtatGATCAGTGAGGCAGATGACAGATTTCAAGAGAATCTGTCATCTGCCTCACTGACTTTTTGct  
cgagctggcgaattcc  
>CD\_NM\_001008540.1:1187  
CgCtGcgagtctGGtatGATTTCTTCCACTGTTGTCTGAATTCAAGAGATTCAGACAACAGTGGAAGAAAGTTTTGct  
cgagctggcgaattcc  
>CD\_NM\_001008540.1:1224  
CgCtGcgagtctGGtatGCTTCTTGGAGCCAAATTTAAATTTCAAGAGATTTAAATTTGGCTCCAAGGAAATTTTTGct  
cgagctggcgaattcc  
>CD\_NM\_001008540.1:1132  
CgCtGcgagtctGGtatGAGGTGTGAGTTTGAGAACACTGTTCAAGAGACAGTGTCTCAAACACACCCTTTTTGct  
cgagctggcgaattcc  
>CD\_NM\_001008540.1:812  
CgCtGcgagtctGGtatGCGCTGACTATTCCCAGCTTCATTTCAAGAGAATGAAGTCGGGAATAGTCAGCATTTTTGct  
cgagctggcgaattcc  
>CD\_NM\_001008540.1:801  
CgCtGcgagtctGGtatGACCTGCCCTCCTGCTGACTATTTTTCAAGAGAAATAGTCAGCAGGAGGGCAGGGTTTTGct  
cgagctggcgaattcc  
>CD\_NM\_001008540.1:1256  
CgCtGcgagtctGGtatGCGCACGCACTCACCTCTGTGAGTTCAAGAGACTCACAGAGGTGAGTGCGTGCTTTTTGct  
cgagctggcgaattcc  
>CD\_NM\_001008540.1:1101  
CgCtGcgagtctGGtatGATCCTTCATCCTCCTGGAAATCTTCAAGAGAGATTTCCAGGAGGATGAAGGAGTTTTGct  
cgagctggcgaattcc  
>CD\_NM\_001008540.1:933  
CgCtGcgagtctGGtatGCGGCCCTTATCCTGCCTGGTATTTTTCAAGAGAAATACCAGGCAGGATAAGGCCATTTTTGct  
cgagctggcgaattcc  
>CD\_NM\_001008540.1:467  
CgCtGcgagtctGGtatGATGGCATTGTGGGCAATGGATTTTTCAAGAGAAATCCATTGCCACAAATGCCAGTTTTGct  
cgagctggcgaattcc  
>CD\_NM\_001008540.1:1110  
CgCtGcgagtctGGtatGACTCCTGGAAATCATCAAGCAATTTCAAGAGATTGCTTGATGATTTCCAGGAGTTTTGct  
cgagctggcgaattcc  
>CD\_NM\_001008540.1:561  
CgCtGcgagtctGGtatGAGCCGACCTCCTCTTTGTCTCTTCAAGAGAGATGACAAAGAGGAGGTCGGCCTTTTTGct  
cgagctggcgaattcc  
>CD\_NM\_001008540.1:1210  
CgCtGcgagtctGGtatGACCATCCTCTATGCTTTCCTTGTTCAGAGACAAGGAAAGCATAGAGGATGGGTTTTGct  
cgagctggcgaattcc  
>CD\_NM\_001008540.1:920  
CgCtGcgagtctGGtatGCGCACATCATGGTTGGCCTTATTTCAAGAGAATAAGGCCAACCATGATGTGCTTTTTGct  
cgagctggcgaattcc  
>CD\_NM\_001008540.1:489  
CgCtGcgagtctGGtatGAGTCATCCTGGTCATGGGTTACTTCAAGAGAGTAACCCATGACCAGGATGACCTTTTTGct  
cgagctggcgaattcc  
>CD\_NM\_001008540.1:657

CgCctGcgagtctGGtatGAATCTACACAGTCAACCTCTACTTCAAGAGAGTAGAGGTTGACTGTGTAGATGTTTTTGct  
cgagctggcgaattcc  
>CD\_NM\_001716:629  
CgCctGcgagtctGGtatGCGCCAGAGATTCTCTTCGCCAATTC AAGAGATTGGCGAAGAGAATCTCTGGCATTMTTGTct  
cgagctggcgaattcc  
>CD\_NM\_001716:952  
CgCctGcgagtctGGtatGATGGACAATACCTGCAAGCTGATTCAAGAGATCAGCTTGCAGGTATTGTCCACTMTTGTct  
cgagctggcgaattcc  
>CD\_NM\_001716.2:629  
CgCctGcgagtctGGtatGACCAGAGATTCTCTTCGCCAATTC AAGAGATTTGGCGAAGAGAATCTCTGGCTMTTGTct  
cgagctggcgaattcc  
>CD\_NM\_001716.2:464  
CgCctGcgagtctGGtatGACTGCACAAAGTCAACTTCTACTTCAAGAGAGTAGAAGTTGACTTTGTGCAGGTTMTTGTct  
cgagctggcgaattcc  
>CD\_NM\_001716.2:952  
CgCctGcgagtctGGtatGCGGACAATACCTGCAAGCTGAATTCAAGAGATTCAGCTTGCAGGTATTGTCCACTMTTGTct  
cgagctggcgaattcc  
>CD\_NM\_001716.2:452  
CgCctGcgagtctGGtatGCACTGTGATTGCCCTGCACAAATTC AAGAGATTTGTGCAGGGCAATCACAGTTTTTGTct  
cgagctggcgaattcc  
>CD\_NM\_001716.2:565  
CgCctGcgagtctGGtatGACCGCCTCCTCTCCATCCACATTTCAAGAGAATGTGGATGGAGAGGAGGCGGCTMTTGTct  
cgagctggcgaattcc  
>CD\_NM\_001716.2:269  
CgCctGcgagtctGGtatGACTCCTGGGCGTGATCGGCAACTTC AAGAGAGTTGCCGATCACGCCCAGGAGTTMTTGTct  
cgagctggcgaattcc  
>CD\_NM\_001716.2:1015  
CgCctGcgagtctGGtatGACCTGGCCCACTGCTGCCTCAATTC AAGAGATTGAGGCAGCAGTGGGCCAGGCTMTTGTct  
cgagctggcgaattcc  
>CD\_NM\_001716.2:338  
CgCctGcgagtctGGtatGAACGGAGACCTTCTGTTCCTCAACTTC AAGAGAGTGGAACAGGAAGGTCTCCGTMTTGTct  
cgagctggcgaattcc  
>CD\_NM\_001716.2:1058  
CgCctGcgagtctGGtatGAGGCGTGAAGTTCGCGAGTACTTCAAGAGAGTCACTGCGGAACCTCACGCCGTTMTTGTct  
cgagctggcgaattcc  
>CD\_NM\_001716.2:938  
CgCctGcgagtctGGtatGAAGGCTGAAGGCCGTGGACAATTTCAAGAGAATTTGTCCACGGCCTTCAGCCTCTMTTGTct  
cgagctggcgaattcc  
>CD\_NM\_001716.2:145  
CgCctGcgagtctGGtatGCGGACAGATTGGACAAC TATAATTC AAGAGATTATAGTTGTCCAATCTGTCCACTMTTGTct  
cgagctggcgaattcc  
>CD\_NM\_001716.2:536  
CgCctGcgagtctGGtatGCGTCCACGCCGTCCATGCCTACTTCAAGAGAGTAGGCATGGACGGCGTGGACATMTTGTct  
cgagctggcgaattcc  
>CD\_NM\_001716.2:580  
CgCctGcgagtctGGtatGCCACATCACCTGTGGGACCATTTCAAGAGAATGGTCCCACAGGTGATGTGGATMTTGTct  
cgagctggcgaattcc  
>CD\_NM\_001716.2:368  
CgCctGcgagtctGGtatGAGCCGACCTCCTGCTGGTCTTCTTCAAGAGAGAAGACCAGCAGGAGGTCGGCCTMTTGTct  
cgagctggcgaattcc  
>CD\_NM\_001716.2:1157  
CgCctGcgagtctGGtatGAAGTCTCTCTGAGTCAGAGAATTTCAAGAGAATTTCTCTGACTCAGAGAGACTGTTTTGTct  
cgagctggcgaattcc  
>CD\_NM\_001716.2:685

CgCctGcgagtctGGtatGATTGCACCTTCTCCCAAGAGAATTCAAGAGATTCTCTTGGGAGAAGGTGCAACTTTTTTGct  
cgagctggcgaattcc  
>CD\_NM\_001716.2:122  
CgCctGcgagtctGGtatGACTGGAGGACCTGTTCTGGGAATTCAAGAGATCCCAGAACAGGTCTCCAGTTTTTTGct  
cgagctggcgaattcc  
>CD\_NM\_001716.2:92  
CgCctGcgagtctGGtatGACCGCTAACGCTGAAATGGACTTCAAGAGAGTCCATTTCCAGCGTTAGCGGGTTTTTTGct  
cgagctggcgaattcc  
>CD\_NM\_001716.2:143  
CgCctGcgagtctGGtatGCCTGGACAGATTGGACAACCTATTTCAAGAGAATAGTTGTCCAATCTGTCCAGTTTTTTGct  
cgagctggcgaattcc  
>CD\_NM\_001716.2:925  
CgCctGcgagtctGGtatGCGGACACCCTGGCGAGGCTGAATTCAAGAGATTCAGCCTCGCCAGGGTGTCCATTTTTTTGct  
cgagctggcgaattcc  
>CD\_NM\_001716.2:1117  
CgCctGcgagtctGGtatGATGCCTCCCTGTGCCAGCTCTTTTCAAGAGAAAGAGCTGGCACAGGGAGGCAGTTTTTTGct  
cgagctggcgaattcc  
>CD\_NM\_001716.2:1169  
CgCctGcgagtctGGtatGATCAGAGAATGCCACCTCTCTTCAAGAGAGAGAGAGGTGGCATTCTCTGACTTTTTTTGct  
cgagctggcgaattcc  
>CD\_NM\_001716.2:1123  
CgCctGcgagtctGGtatGACCTGTGCCAGCTCTTCCCTAGTTCAAGAGACTAGGGAAGAGCTGGCACAGGGTTTTTTGct  
cgagctggcgaattcc  
>CD\_NM\_001716.2:596  
CgCctGcgagtctGGtatGAACCATCTGGCTGGTGGGCTTCTTCAAGAGAGAAGCCACCAGCCAGATGGTCTTTTTTTGct  
cgagctggcgaattcc  
>CD\_NM\_001716.2:899  
CgCctGcgagtctGGtatGATCACCTACCACATCGTCATCTTCAAGAGAGATGACGATGTGGTAGGGTGACTTTTTTTGct  
cgagctggcgaattcc  
>CD\_NM\_001716.2:1167  
CgCctGcgagtctGGtatGAAGTCAGAGAATGCCACCTCTCTTCAAGAGAGAGAGGTGGCATTCTCTGACTTTTTTTGct  
cgagctggcgaattcc  
>CD\_NM\_001716.2:293  
CgCctGcgagtctGGtatGACTGGTGCTGGTGATCCTGGAGTTCAAGAGACTCCAGGATCACCAGCACCAGTTTTTTGct  
cgagctggcgaattcc  
>CD\_NM\_001716.2:251  
CgCctGcgagtctGGtatGAGCCTACAGCCTCATCTTCTCTTCAAGAGAGAGGAAGATGAGGCTGTAGGCCTTTTTTTGct  
cgagctggcgaattcc  
>CD\_NM\_001716.2:696  
CgCctGcgagtctGGtatGCCCCAAGAGAACCAAGCAGAAATTCAAGAGATTTCTGCTTGGTTCTCTTGGGATTTTTTTGct  
cgagctggcgaattcc  
>CD\_NM\_001716.2:834  
CgCctGcgagtctGGtatGAGCCCTCAGCGGCAGAAGGCAGTTCAAGAGACTGCCTTCTGCCGCTGAGGGCGTTTTTTGct  
cgagctggcgaattcc  
>CD\_NM\_001716.2:902  
CgCctGcgagtctGGtatGCCCTACCACATCGTCATCTTCTTCAAGAGAGAAGATGACGATGTGGTAGGGTTTTTTGct  
cgagctggcgaattcc  
>CD\_NM\_006564:172  
CgCctGcgagtctGGtatGCAGGTCTTCTGCCCTGCATGTTTCAAGAGAACATGCAGGGCAGAAAGACCTTTTTTTGct  
cgagctggcgaattcc  
>CD\_NM\_006564:707  
CgCctGcgagtctGGtatGCCTGCTATTCAGTCATAATCAATTCAAGAGATTGATTATGACTGAATAGCAGATTTTTTTGct  
cgagctggcgaattcc  
>CD\_NM\_006564:815

CgCctGcgagtctGGtatGCGCCCTTCAACCTCATGAAGTTTTCAAGAGAACTTCATGAGGTTGAAGGGCATTTTTGct  
cgagctggcgaattcc  
>CD\_NM\_006564.1:707  
CgCctGcgagtctGGtatGATGCTATTCAGTCATAATCAAATTCAGAGATTTGATTATGACTGAATAGCAGTTTTGct  
cgagctggcgaattcc  
>CD\_NM\_006564.1:843  
CgCctGcgagtctGGtatGCGCACACACTGGGAATACTATGTTCAAGAGACATAGTATCCAGTGTGTGCTTTTTGct  
cgagctggcgaattcc  
>CD\_NM\_006564.1:898  
CgCctGcgagtctGGtatGAAGAGGCCATCGCATACCTGAGTTCAAGAGACTCAGGTATGCGATGGCCTCTGTTTTGct  
cgagctggcgaattcc  
>CD\_NM\_006564.1:815  
CgCctGcgagtctGGtatGACCCTTCAACCTCATGAAGTTCTTCAAGAGAGAACTTCATGAGGTTGAAGGGCTTTTTGct  
cgagctggcgaattcc  
>CD\_NM\_006564.1:447  
CgCctGcgagtctGGtatGCTCACTGTGGATCGTTTCATTGTTCAAGAGACAATGAAACGATCCACAGTGATTTTTGct  
cgagctggcgaattcc  
>CD\_NM\_006564.1:791  
CgCctGcgagtctGGtatGAGCTGTGTTCTGCTGACCCAGTTCAAGAGACTGGGTCAGCAGGAACACAGCCTTTTTGct  
cgagctggcgaattcc  
>CD\_NM\_006564.1:81  
CgCctGcgagtctGGtatGCTGGCAGAGCATGATTACCATGTTCAAGAGACATGGTAATCATGCTCTGCCATTTTTGct  
cgagctggcgaattcc  
>CD\_NM\_006564.1:808  
CgCctGcgagtctGGtatGACCAGATGCCCTTCAACCTCATTTCAAGAGAATGAGGTTGAAGGGCATCTGGGTTTTGct  
cgagctggcgaattcc  
>CD\_NM\_006564.1:368  
CgCctGcgagtctGGtatGATTTGGCCAGGTCATGTGCAAGTTCAAGAGACTTGCACATGACCTGGCCAACTTTTTGct  
cgagctggcgaattcc  
>CD\_NM\_006564.1:275  
CgCctGcgagtctGGtatGAACGGATGTGTTCTGGTGAACTTCAAGAGAGTTCACCAGGAACACATCCGCTTTTTGct  
cgagctggcgaattcc  
>CD\_NM\_006564.1:430  
CgCctGcgagtctGGtatGCGCTCATCCTCACCTGCATCACTTCAAGAGAGTGATGCAGGTGAGGATGAGCATTTTTGct  
cgagctggcgaattcc  
>CD\_NM\_006564.1:953  
CgCctGcgagtctGGtatGAAGCCTGAAGTTTCGAAAGAACTTCAAGAGAGTTCCTTCGAAACTTCAGGCTGTTTTGct  
cgagctggcgaattcc  
>CD\_NM\_006564.1:443  
CgCctGcgagtctGGtatGATGCATCACTGTGGATCGTTTCTTCAAGAGAGAAACGATCCACAGTGATGCAGTTTTGct  
cgagctggcgaattcc  
>CD\_NM\_006564.1:394  
CgCctGcgagtctGGtatGCACTGGGCATCTACACTATTAATTCAAGAGATTAATAGTGTAGATGCCAGTATTTTTGct  
cgagctggcgaattcc  
>CD\_NM\_006564.1:823  
CgCctGcgagtctGGtatGCCCTCATGAAGTTCATCCGCAGTTCAAGAGACTGCGGATGAACTTCATGAGGTTTTGct  
cgagctggcgaattcc  
>CD\_NM\_006564.1:703  
CgCctGcgagtctGGtatGCTGTCTGCTATTCAGTCATAATTTCAAGAGAATTATGACTGAATAGCAGACAATTTTTGct  
cgagctggcgaattcc  
>CD\_NM\_006564.1:235  
CgCctGcgagtctGGtatGCGCTGGTCATATCCATCTTCTATTCAAGAGATAGAAGATGGATATGACCAGCATTTTTGct  
cgagctggcgaattcc  
>CD\_NM\_006564.1:458

CgCtGcgagtctGGtatGCCGTTTCATTGTAGTGGTTAAGTTCAAGAGACTTAACCACTACAATGAAACGATTTTTGct  
cgagctggcgaattcc  
>CD\_NM\_006564.1:452  
CgCtGcgagtctGGtatGCGTGGATCGTTTCATTGTAGTGGTTCAAGAGACACTACAATGAAACGATCCACATTTTTGct  
cgagctggcgaattcc  
>CD\_NM\_006564.1:241  
CgCtGcgagtctGGtatGCCATATCCATCTTCTACCATAATTCAAGAGATTATGGTAGAAGATGGATATGATTTTTGct  
cgagctggcgaattcc  
>CD\_NM\_006564.1:1032  
CgCtGcgagtctGGtatGCGGAAATCTTCTGAGGACAATTTTCAAGAGAAATTGTCTCAGAAGATTTCCATTTTTGct  
cgagctggcgaattcc  
>CD\_NM\_006564.1:535  
CgCtGcgagtctGGtatGACTTGCTCATCTGGGTGATATCTTCAAGAGAGATATCACCCAGATGAGCAAGCTTTTTGct  
cgagctggcgaattcc  
>CD\_NM\_006564.1:185  
CgCtGcgagtctGGtatGATGCATGTACCTGGTGGTGTTTTTCAAGAGAAAACACCACCAGGTACATGCAGTTTTGct  
cgagctggcgaattcc  
>CD\_NM\_006564.1:172  
CgCtGcgagtctGGtatGCGGTCTTCTGCCCTGCATGTATTCAAGAGATACATGCAGGGCAGAAAGACCTTTTTGct  
cgagctggcgaattcc  
>CD\_NM\_006564.1:910  
CgCtGcgagtctGGtatGAATACCTGAGGGCCTGCCTTAATTCAAGAGATTAAGGCAGGCCCTCAGGTATTTTTGct  
cgagctggcgaattcc  
>CD\_NM\_006564.1:488  
CgCtGcgagtctGGtatGAGCCTACAACCAGCAAGCCAAGTTCAAGAGACTTGGCTTGCTGGTTGTAGGCCTTTTTGct  
cgagctggcgaattcc  
>CD\_NM\_006564.1:923  
CgCtGcgagtctGGtatGATGCCTTAACCCTGTGCTCTATTTCAAGAGAATAGAGCACAGGGTTAAGGCAGTTTTGct  
cgagctggcgaattcc  
>CD\_NM\_006564.1:751  
CgCtGcgagtctGGtatGCCAGAAGCACAGATCTCTAAATTCAAGAGATTTAGAGATCTGTGCTTCTGGATTTTTGct  
cgagctggcgaattcc  
>CD\_NM\_006564.1:584  
CgCtGcgagtctGGtatGATATGGCAATGTCTTTAATCTCTTCAAGAGAGAGATTAAGACATTGCCATAGTTTTGct  
cgagctggcgaattcc  
>CD\_NM\_006564.1:112  
CgCtGcgagtctGGtatGAGTTCAGCAGTTTCAATGACAGTTCAAGAGACTGTCATTGAAACTGCTGAACCTTTTTGct  
cgagctggcgaattcc  
>CD\_NM\_001295:620  
CgCtGcgagtctGGtatGAAGCCTTCACTTTCCTCACGAATTCAAGAGATTCGTGAGGAAAGTGAAGGCTTTTTGct  
cgagctggcgaattcc  
>CD\_NM\_001295:642  
CgCtGcgagtctGGtatGCGCCTACGAGAGTGGAAGCTGTTTCAAGAGAACAGCTTCCACTCTCGTAGGCCTTTTTGct  
cgagctggcgaattcc  
>CD\_NM\_001295:757  
CgCtGcgagtctGGtatGAACCAAATGAGAAGAAATCCAATTCAAGAGATTGGATTTCTTCTCATTTGGTCTTTTTGct  
cgagctggcgaattcc  
>CD\_NM\_001295.2:661  
CgCtGcgagtctGGtatGATTCAGGCTCTGAAACTGAACTTCAAGAGAGTTAGTTTCAGAGCCTGAACTTTTTGct  
cgagctggcgaattcc  
>CD\_NM\_001295.2:620  
CgCtGcgagtctGGtatGCGCCTTCACTTTCCTCACGAAATTCAAGAGATTTTCGTGAGGAAAGTGAAGGCTTTTTGct  
cgagctggcgaattcc  
>CD\_NM\_001295.2:667

CgCctGcgagtctGGtatGAGCTCTGAAACTGAACCTCTTTTTCAAGAGAAAAGAGGTTTCAGTTTCAGAGCCTTTTTTGct  
cgagctggcgaattcc  
>CD\_NM\_001295.2:721  
CgCctGcgagtctGGtatGATGCTACACAGGGATTATAAAGTTCAAGAGACTTTATAATCCCTGTGTAGCAGTTTTTTGct  
cgagctggcgaattcc  
>CD\_NM\_001295.2:238  
CgCctGcgagtctGGtatGACTGGTCCCTTGTGCAATACAAGTTCAAGAGACTTGTATTGCACAAGGACCAGTTTTTTGct  
cgagctggcgaattcc  
>CD\_NM\_001295.2:939  
CgCctGcgagtctGGtatGACTACACGCACTGCTGTGTCAATTCAAGAGATTGACACAGCAGTGCGTGTAGGTTTTTTGct  
cgagctggcgaattcc  
>CD\_NM\_001295.2:205  
CgCctGcgagtctGGtatGCGTCATTGGCCTGGTTGGAACTTCAAGAGAGTTTCCAACCAGGCCAATGACATTTTTTTGct  
cgagctggcgaattcc  
>CD\_NM\_001295.2:631  
CgCctGcgagtctGGtatGCCCTCACGAAAGCCTACGAGAGTTCAAGAGACTCTCGTAGGCTTTCGTGAGGATTTTTTTGct  
cgagctggcgaattcc  
>CD\_NM\_001295.2:982  
CgCctGcgagtctGGtatGCGGTGAGAGGTTCCGGAAGTACTTCAAGAGAGTACTTCCGGAACCTCTCACCATTTTTTTGct  
cgagctggcgaattcc  
>CD\_NM\_001295.2:700  
CgCctGcgagtctGGtatGACCTTTGTTGGTCATGATCATCTTCAAGAGAGATGATCATGACCAACAAAGGCTTTTTTTGct  
cgagctggcgaattcc  
>CD\_NM\_001295.2:708  
CgCctGcgagtctGGtatGCGGTCATGATCATCTGCTACACTTCAAGAGAGTGTAGCAGATGATCATGACCATTTTTTTGct  
cgagctggcgaattcc  
>CD\_NM\_001295.2:306  
CgCctGcgagtctGGtatGATGACCTGCTCTTCCTGTTCACTTCAAGAGAGTGAACAGGAAGAGCAGGTCAGTTTTTTGct  
cgagctggcgaattcc  
>CD\_NM\_001295.2:706  
CgCctGcgagtctGGtatGATTGGTCATGATCATCTGCTACTTCAAGAGAGTAGCAGATGATCATGACCAACTTTTTTTGct  
cgagctggcgaattcc  
>CD\_NM\_001295.2:519  
CgCctGcgagtctGGtatGATGTCATCACCAGCATCATCATTTTCAAGAGAATGATGATGCTGGTGATGACACTTTTTTTGct  
cgagctggcgaattcc  
>CD\_NM\_001295.2:752  
CgCctGcgagtctGGtatGCGACGACCAAATGAGAAGAAATTTCAAGAGAATTTCTTCTCATTTGGTCGTCTTTTTTTGct  
cgagctggcgaattcc  
>CD\_NM\_001295.2:304  
CgCctGcgagtctGGtatGCTCTGACCTGCTCTTCCTGTTCTTCAAGAGAGAACAGGAAGAGCAGGTCAGAATTTTTTTGct  
cgagctggcgaattcc  
>CD\_NM\_001295.2:1002  
CgCctGcgagtctGGtatGCCCTGCGGCAGTTGTTCCACAGTTCAAGAGACTGTGGAACAACTGCCGCAGGTTTTTTGct  
cgagctggcgaattcc  
>CD\_NM\_001295.2:719  
CgCctGcgagtctGGtatGCTCTGCTACACAGGGATTATAATTCAAGAGATTATAATCCCTGTGTAGCAGATTTTTTTGct  
cgagctggcgaattcc  
>CD\_NM\_001295.2:184  
CgCctGcgagtctGGtatGACCTCTGTACTCCTTGGTATTTTTTCAAGAGAAAATACCAAGGAGTACAGAGGTTTTTTGct  
cgagctggcgaattcc  
>CD\_NM\_001295.2:646  
CgCctGcgagtctGGtatGCCGAGAGTGGAAGCTGTTTCAGTTCAAGAGACTGAAACAGCTTCCACTCTCGTTTTTTGct  
cgagctggcgaattcc  
>CD\_NM\_001295.2:133

CgCctGcgagtctGGtatGCACTCCGTGCCAGAAGGTGAACTTCAAGAGAGTTCACCTTCTGGCACGGAGTTTTTTTGct  
cgagctggcgaattcc  
>CD\_NM\_001295.2:1024  
CgCctGcgagtctGGtatGACGTGTGGCTGTGCACCTGGTTTTCAAGAGAAACCAGGTGCACAGCCACACGTTTTTTGct  
cgagctggcgaattcc  
>CD\_NM\_001295.2:235  
CgCctGcgagtctGGtatGAGTCCTGGTCCCTTGTGCAATACTTCAAGAGAGTATTGCACAAGGACCAGGACTTTTTTGct  
cgagctggcgaattcc  
>CD\_NM\_001295.2:240  
CgCctGcgagtctGGtatGCGGTCCCTTGTGCAATACAAGAGTTCAAGAGACTCTTGTATTGCACAAGGACCATTTTTGct  
cgagctggcgaattcc  
>CD\_NM\_001295.2:757  
CgCctGcgagtctGGtatGCCCAAATGAGAAGAAATCCAAATTCAGAGATTTGGATTTCTTCTCATTTGGTTTTTTGct  
cgagctggcgaattcc  
>CD\_NM\_001295.2:1088  
CgCctGcgagtctGGtatGCGCTCCACATCTCCCTCCACAGTTCAAGAGACTGTGGAGGGAGATGTGGAGCTTTTTTTGct  
cgagctggcgaattcc  
>CD\_NM\_001295.2:1077  
CgCctGcgagtctGGtatGCGGAGAGGGTCAGCTCCACATCTTCAAGAGAGATGTGGAGCTGACCCCTCCATTTTTGct  
cgagctggcgaattcc  
>CD\_NM\_001295.2:331  
CgCctGcgagtctGGtatGCCCTTCTGGATCGACTACAAGTTCAAGAGACTTGTAGTCGATCCAGAAGGGATTTTTGct  
cgagctggcgaattcc  
>CD\_NM\_001295.2:277  
CgCctGcgagtctGGtatGAAGCATCTACCTCCTGAACCTGTTCAAGAGACAGGTTACAGGAGGTAGATGCTGTTTTTTGct  
cgagctggcgaattcc  
>CD\_NM\_001295.2:189  
CgCctGcgagtctGGtatGCGTACTCCTTGGTATTTGTCAATTTCAAGAGAATGACAAATACCAAGGAGTACATTTTTGct  
cgagctggcgaattcc  
>CD\_NM\_000648:681  
CgCctGcgagtctGGtatGCTCCACACAATAATGAGGAACATTCAGAGATGTTCCCTCATTATTGTGTGGAATTTTTGct  
cgagctggcgaattcc  
>CD\_NM\_000648:86  
CgCctGcgagtctGGtatGATCCACATCTCGTTCCTCGTTTTTCAAGAGAAAACCGAGAACGAGATGTGGACTTTTTGct  
cgagctggcgaattcc  
>CD\_NM\_000648:162  
CgCctGcgagtctGGtatGCACGGTGCTCCCTGTCATAAATTTCAAGAGAATTTATGACAGGGAGCACCGTATTTTTGct  
cgagctggcgaattcc  
>CD\_NM\_000648:403  
CgCctGcgagtctGGtatGCTGGGAATGCAATGTGCAAATTTTCAAGAGAAATTTGCACATTGCATTCCCAATTTTTGct  
cgagctggcgaattcc  
>CD\_NM\_000648:430  
CgCctGcgagtctGGtatGAAGGGCTGTATCACATCGGTTATTCAAGAGATAACCGATGTGATACAGCCCTGTTTTTTGct  
cgagctggcgaattcc  
>CD\_NM\_000648:264  
CgCctGcgagtctGGtatGATGGTCGTCTCATCTTAATAATTCAAGAGATTATTAAGATGAGGACGACCAGTTTTTTGct  
cgagctggcgaattcc  
>CD\_NM\_000647:86  
CgCctGcgagtctGGtatGATCCACATCTCGTTCCTCGTTTTTCAAGAGAAAACCGAGAACGAGATGTGGACTTTTTGct  
cgagctggcgaattcc  
>CD\_NM\_000647:94  
CgCctGcgagtctGGtatGATCGTTCCTCGTTTTATCAGAAATTCAGAGATTTCTGATAAACCGAGAACGAGTTTTTTGct  
cgagctggcgaattcc  
>CD\_NM\_000647:264A

CgCctGcgagtctGGtatGATGGTTCCTCATCTTAATAATTCAAGAGATTATTAAGATGAGGACGACCAGTTTTTGct  
cgagctggcgaattcc  
>CD\_NM\_000647:430  
CgCctGcgagtctGGtatGAAGGGCTGTATCACATCGGTTATTCAAGAGATAACCGATGTGATACAGCCCTTTTTTGct  
cgagctggcgaattcc  
>CD\_NM\_000647:598  
CgCctGcgagtctGGtatGCCCCAGGAATCATCTTTACTAATTCAAGAGATTAGTAAAGATGATTCCCTGGGATTTTTGct  
cgagctggcgaattcc  
>CD\_NM\_000647:671  
CgCctGcgagtctGGtatGCTGGAATAATTTCCACACAATATTCAAGAGATATTGTGTGGAAATTATTCCATTTTTTGct  
cgagctggcgaattcc  
>CD\_NM\_000647:403  
CgCctGcgagtctGGtatGCTGGGAATGCAATGTGCAAATTTTCAAGAGAAATTTGCACATTGCATTCCCAATTTTTGct  
cgagctggcgaattcc  
>CD\_NM\_000647:162A  
CgCctGcgagtctGGtatGCACGGTGCTCCCTGTCATAAATTTCAAGAGAATTTATGACAGGGAGCACCGTATTTTTGct  
cgagctggcgaattcc  
>CD\_NM\_000647:681  
CgCctGcgagtctGGtatGCTCCACACAATAATGAGGAACATTCAAGAGATGTTCCCTCATTATTGTGTGGAATTTTTGct  
cgagctggcgaattcc  
>CD\_NM\_000647.3:371  
CgCctGcgagtctGGtatGCGGGCTCACTCTGCTGCAAATGTTCAAGAGACATTTGCAGCAGAGTGAGCCATTTTTGct  
cgagctggcgaattcc  
>CD\_NM\_000647.3:430  
CgCctGcgagtctGGtatGCGGGCTGTATCACATCGGTTATTTCAAGAGAATAACCGATGTGATACAGCCCTTTTTTGct  
cgagctggcgaattcc  
>CD\_NM\_000647.3:164  
CgCctGcgagtctGGtatGAGTGCTCCCTGTCATAAATTTGTTCAAGAGACAAATTTATGACAGGGAGCACCTTTTTGct  
cgagctggcgaattcc  
>CD\_NM\_000647.3:453  
CgCctGcgagtctGGtatGCTGGCGGAATCTTCTTCATCATTTTCAAGAGAATGATGAAGAAGATTCCGCCAATTTTTGct  
cgagctggcgaattcc  
>CD\_NM\_000647.3:897  
CgCctGcgagtctGGtatGACCTGAGTAACTGTGAAAGCACTTCAAGAGAGTGCTTTTACAGTTACTCAGGCTTTTTGct  
cgagctggcgaattcc  
>CD\_NM\_000647.3:505  
CgCctGcgagtctGGtatGCGTCCATGCTGTGTTTGTCTTTATTCAAGAGATAAAGCAAACACAGCATGGACATTTTTGct  
cgagctggcgaattcc  
>CD\_NM\_000647.3:973  
CgCctGcgagtctGGtatGATGCATCAATCCCATCATCTATTTCAAGAGAATAGATGATGGGATTGATGCAGTTTTTGct  
cgagctggcgaattcc  
>CD\_NM\_000647.3:475  
CgCctGcgagtctGGtatGACTCCTGACAATCGATAGATACTTCAAGAGAGTATCTATCGATTGTCAGGAGTTTTGct  
cgagctggcgaattcc  
>CD\_NM\_000647.3:172  
CgCctGcgagtctGGtatGATGTCATAAATTTGACGTGAAGTTCAAGAGACTTCACGTCAAATTTATGACAGTTTTGct  
cgagctggcgaattcc  
>CD\_NM\_000647.3:265  
CgCctGcgagtctGGtatGAGTCGTCCCTCATCTTAATAAACTTCAAGAGAGTTTATTAAGATGAGGACGACCTTTTTGct  
cgagctggcgaattcc  
>CD\_NM\_000647.3:99  
CgCctGcgagtctGGtatGATCGGTTTATCAGAAATACCAATTCAAGAGATTGGTATTTCTGATAAACCGAGTTTTGct  
cgagctggcgaattcc  
>CD\_NM\_000647.3:670



CgCctGcgagtctGGtatGCTGGAATAATTTCCACACAATATTCAAGAGATATTGTGTGGAAATTATCCATTTTTTgct  
cgagctggcgaattcc  
>CD\_NM\_000647.3:264  
CgCctGcgagtctGGtatGCGGTCTCCTCATCTTAATAAAATTTCAAGAGATTTATTAAGATGAGGACGACCATTTTTGct  
cgagctggcgaattcc  
>CD\_NM\_000647.3:598  
CgCctGcgagtctGGtatGACCAGGAATCATCTTTACTAAATTTCAAGAGATTTAGTAAAGATGATTCTCTGGTTTTTgct  
cgagctggcgaattcc  
>CD\_NM\_000647.3:267  
CgCctGcgagtctGGtatGCCGTCTCCTCATCTTAATAAACTGTTCAAGAGACAGTTTATTAAGATGAGGACGATTTTTGct  
cgagctggcgaattcc  
>CD\_NM\_000647.3:307  
CgCctGcgagtctGGtatGAACTGACATTTACCTGCTCAACTTTCAAGAGAGTTGAGCAGGTAAATGTCAGTCTTTTTGct  
cgagctggcgaattcc  
>CD\_NM\_000647.3:623  
CgCctGcgagtctGGtatGAAGAAAGAAGATTCTGTTTATGTTCAAGAGACATAAACAGAATCTTCTTTCTGTTTTTgct  
cgagctggcgaattcc  
>CD\_NM\_000647.3:388  
CgCctGcgagtctGGtatGCAATGAGTGGGTCTTTGGGAATTTCAAGAGAATTTCCCAAAGACCCACTCATTTTTTTGct  
cgagctggcgaattcc  
>CD\_NM\_000648.1:371  
CgCctGcgagtctGGtatGCGGGCTCACTCTGCTGCAAATGTTCAAGAGACATTTGCAGCAGAGTGAGCCATTTTTGct  
cgagctggcgaattcc  
>CD\_NM\_000648.1:1023  
CgCctGcgagtctGGtatGCTCTCTCGGTGTTCTTCCGAAATTTCAAGAGATTTCCGGAAGAACACCGAGAGATTTTTTgct  
cgagctggcgaattcc  
>CD\_NM\_000648.1:430  
CgCctGcgagtctGGtatGCGGGCTGTATCACATCGGTTATTTCAAGAGAATAACCGATGTGATACAGCCTTTTTTGct  
cgagctggcgaattcc  
>CD\_NM\_000648.1:164  
CgCctGcgagtctGGtatGAGTGCTCCCTGTCATAAATTTGTTCAAGAGACAAATTTATGACAGGGAGCACTTTTTTGct  
cgagctggcgaattcc  
>CD\_NM\_000648.1:453  
CgCctGcgagtctGGtatGCTGGCGGAATCTTCTTCATCATTTTCAAGAGAATGATGAAGAAGATTCCGCCAATTTTTGct  
cgagctggcgaattcc  
>CD\_NM\_000648.1:897  
CgCctGcgagtctGGtatGACCTGAGTAACTGTGAAAGCACTTTCAAGAGAGTGCTTTCACAGTTACTCAGGCTTTTTGct  
cgagctggcgaattcc  
>CD\_NM\_000648.1:505  
CgCctGcgagtctGGtatGCGTCCATGCTGTGTTTGTCTTTATTCAAGAGATAAAGCAAACACAGCATGGACATTTTTGct  
cgagctggcgaattcc  
>CD\_NM\_000648.1:973  
CgCctGcgagtctGGtatGATGCATCAATCCCATCATCTATTTCAAGAGAATAGATGATGGGATTGATGCAGTTTTTTGct  
cgagctggcgaattcc  
>CD\_NM\_000648.1:475  
CgCctGcgagtctGGtatGACTCCTGACAATCGATAGATACTTTCAAGAGAGTATCTATCGATTGTCAGGAGTTTTTTGct  
cgagctggcgaattcc  
>CD\_NM\_000648.1:1139  
CgCctGcgagtctGGtatGAAGGAAGTCTCGCTGGTTTTATTTCAAGAGAATAAACCAGCCGAGACTTCTGTTTTTgct  
cgagctggcgaattcc  
>CD\_NM\_000648.1:172  
CgCctGcgagtctGGtatGATGTCATAAATTTGACGTGAAGTTCAAGAGACTTCACGTCAAATTTATGACAGTTTTTTGct  
cgagctggcgaattcc  
>CD\_NM\_000648.1:265

CgCctGcgagtctGGtatGAGTCGTCCATCTTAATAAACTTCAAGAGAGTTTATTAAGATGAGGACGACCTTTTTGct  
cgagctggcgaattcc  
>CD\_NM\_000648.1:99  
CgCctGcgagtctGGtatGATCGGTTTATCAGAAATACCAATTCAGAGATTTGGTATTTCTGATAAACCGAGTTTTGct  
cgagctggcgaattcc  
>CD\_NM\_000648.1:670  
CgCctGcgagtctGGtatGCTGGAATAATTTCCACACAATATTCAGAGATATTGTGTGGAAATTATTCATTTTTGct  
cgagctggcgaattcc  
>CD\_NM\_000648.1:264  
CgCctGcgagtctGGtatGCGGTCGTCCATCTTAATAAACTTCAAGAGATTTATTAAGATGAGGACGACCATTTTTGct  
cgagctggcgaattcc  
>CD\_NM\_000648.1:598  
CgCctGcgagtctGGtatGACCAGGAATCATCTTTACTAAATTCAGAGATTTAGTAAAGATGATTCTGGGTTTTGct  
cgagctggcgaattcc  
>CD\_NM\_000648.1:267  
CgCctGcgagtctGGtatGCCGTCCATCTTAATAAACTGTTCAAGAGACAGTTTATTAAGATGAGGACGATTTTTGct  
cgagctggcgaattcc  
>CD\_NM\_000648.1:307  
CgCctGcgagtctGGtatGAACTGACATTTACCTGCTCAACTTCAAGAGAGTTGAGCAGGTAATGTCAGTCTTTTTGct  
cgagctggcgaattcc  
>CD\_NM\_001837:592  
CgCctGcgagtctGGtatGATGGTGGTGATGATCCTCATAATTCAGAGATTTATGAGGATCATCACCACCCTTTTTGct  
cgagctggcgaattcc  
>CD\_NM\_001837:688  
CgCctGcgagtctGGtatGCCCTTCCATTCTGGATCCACTTTCAAGAGAAGTGGATCCAGAATGGAAGGGTTTTGct  
cgagctggcgaattcc  
>CD\_NM\_001837:1017  
CgCctGcgagtctGGtatGAAGGCATTTCCACACTCTGAGATTCAGAGATCTCAGAGTGTGGAAATGCCCTTTTTGct  
cgagctggcgaattcc  
>CD\_NM\_001837:1474  
CgCctGcgagtctGGtatGAAGCCGGAACCTCTTATTGTGTTTTCAAGAGAACACAATAGAGAGTTCCGGCTTTTTGct  
cgagctggcgaattcc  
>CD\_NM\_001837.2:931  
CgCctGcgagtctGGtatGATGAATTTATCTTCTATGAGACTTCAAGAGAGTCTCATAGAAGATAAATTCAGTTTTGct  
cgagctggcgaattcc  
>CD\_NM\_001837.2:1222  
CgCctGcgagtctGGtatGCTCAATCCATCTTATTTGGAAATTCAGAGATTTCCAAATAAGATGGATTGATTTTTGct  
cgagctggcgaattcc  
>CD\_NM\_001837.2:1449  
CgCctGcgagtctGGtatGCGCTCTGTCTCTCCATCCACAGTTCAAGAGACTGTGGATGGAGAGACAGAGCTTTTTGct  
cgagctggcgaattcc  
>CD\_NM\_001837.2:566  
CgCctGcgagtctGGtatGAACTGTGGGCTCTTGGGCAATTTCAAGAGAATTGCCCAAGAGGCCACAGTTTTTGct  
cgagctggcgaattcc  
>CD\_NM\_001837.2:1055  
CgCctGcgagtctGGtatGAGTTCTCCCTCTGCTCGTTATGTTCAAGAGACATAACGAGCAGAGGGAGAACGTTTTGct  
cgagctggcgaattcc  
>CD\_NM\_001837.2:1300  
CgCctGcgagtctGGtatGACTACTCCCACTGCTGCATGAATTCAGAGATTCATGCAGCAGTGGGAGTAGTTTTGct  
cgagctggcgaattcc  
>CD\_NM\_001837.2:915  
CgCctGcgagtctGGtatGATGCTAGCAGCTTTCCTGAATTTCAAGAGAATTCAGGAAGAGCTGCTAGCACTTTTTGct  
cgagctggcgaattcc  
>CD\_NM\_001837.2:929

CgCtGcgagtctGGtatGCCCTGAATTTATCTTCTATGAGTTCAAGAGACTCATAGAAGATAAAATTCAGGATTTTTGct  
cgagctggcgaattcc  
>CD\_NM\_001837.2:1343  
CgCtGcgagtctGGtatGCGGAGAGAGTTCCGGAAGTACTTCAAGAGAGTACTTCCGGAACCTCTCTCATTTTTTGct  
cgagctggcgaattcc  
>CD\_NM\_001837.2:1024  
CgCtGcgagtctGGtatGCCACACTCTGAGAATGACCATTTCAAGAGAATGGTCATTCTCAGAGTGTGGATTTTTGct  
cgagctggcgaattcc  
>CD\_NM\_001837.2:1206  
CgCtGcgagtctGGtatGCTCCTTCTCTTCTTCTATCAATTTCAAGAGAATTGATAGGAAGAGAGAAGGATTTTTGct  
cgagctggcgaattcc  
>CD\_NM\_001837.2:950  
CgCtGcgagtctGGtatGAACTGAAGAGTTGTTTGAAGAGTTCAAGAGACTCTCAAACAACCTTTCAGTCTTTTTGct  
cgagctggcgaattcc  
>CD\_NM\_001837.2:1030  
CgCtGcgagtctGGtatGATCTGAGAATGACCATCTTCTGTTCAAGAGACAGAAGATGGTCATTCTCAGAGTTTTGct  
cgagctggcgaattcc  
>CD\_NM\_001837.2:831  
CgCtGcgagtctGGtatGACCATTGTCCATGCTGTGTTTGTTCAGAGACAAACACAGCATGGACAATGGCTTTTTGct  
cgagctggcgaattcc  
>CD\_NM\_001837.2:1363  
CgCtGcgagtctGGtatGCCCTGCGCCACTTCTTCCACAGTTCAAGAGACTGTGGAAGAAGTGGCGCAGGTTTTGct  
cgagctggcgaattcc  
>CD\_NM\_001837.2:620  
CgCtGcgagtctGGtatGAAGGCTCCGAATTATGACCAACTTCAAGAGAGTTGGTCATAATTCGGAGCCTTTTTGct  
cgagctggcgaattcc  
>CD\_NM\_001837.2:936  
CgCtGcgagtctGGtatGCTTATCTTCTATGAGACTGAAGTTCAAGAGACTTTCAGTCTCATAGAAGATAAAATTTTTGct  
cgagctggcgaattcc  
>CD\_NM\_001837.2:1271  
CgCtGcgagtctGGtatGACTGGTCATGCTGGTGACAGAGTTCAAGAGACTCTGTCACCAGCATGACCAGTTTTGct  
cgagctggcgaattcc  
>CD\_NM\_001837.2:682  
CgCtGcgagtctGGtatGCCGTCACCCCTCCATTCTGGATTTCAAGAGAATCCAGAATGGAAGGGTGACGATTTTTGct  
cgagctggcgaattcc  
>CD\_NM\_001837.2:1313  
CgCtGcgagtctGGtatGATGCATGAACCCGGTGATCTACTTCAAGAGAGTAGATCACCGGGTTCATGCAGTTTTGct  
cgagctggcgaattcc  
>CD\_NM\_001837.2:880  
CgCtGcgagtctGGtatGATGTCATCACCAGCATCGTCACTTCAAGAGAGTGACGATGCTGGTGATGACACTTTTTGct  
cgagctggcgaattcc  
>CD\_NM\_001837.2:926  
CgCtGcgagtctGGtatGCCTTCTGAATTTATCTTCTATTTCAAGAGAATAGAAGATAAAATTCAGGAAGATTTTTGct  
cgagctggcgaattcc  
>CD\_NM\_001837.2:1028  
CgCtGcgagtctGGtatGAACTCTGAGAATGACCATCTTCTTCAAGAGAGAAGATGGTCATTCTCAGAGTGTTTTTGct  
cgagctggcgaattcc  
>CD\_NM\_001837.2:667  
CgCtGcgagtctGGtatGAGGACCTGCTCTTCTCGTCACTTCAAGAGAGTGACGAGGAAGAGCAGGTCCGTTTTGct  
cgagctggcgaattcc  
>CD\_NM\_001837.2:1202  
CgCtGcgagtctGGtatGAGCTATCCTTCTCTTCTTCTATTTCAAGAGAATAGGAAGAGAGAAGGATAGCCTTTTTGct  
cgagctggcgaattcc  
>CD\_NM\_001837.2:806

CgCctGcgagtctGGtatGACTGCTGACAAATCGACAGGTACTTCAAGAGAGTACCTGTCGATTGTCAGCAGGTTTTTGct  
cgagctggcgaattcc  
>CD\_NM\_001837.2:836  
CgCctGcgagtctGGtatGCGTCCATGCTGTGTTTTGCCCTTTTCAAGAGAAAGGGCAAACACAGCATGGACATTTTTTGct  
cgagctggcgaattcc  
>CD\_NM\_001837.2:1067  
CgCctGcgagtctGGtatGACTCGTTATGGCCATCTGCTACTTCAAGAGAGTAGCAGATGGCCATAACGAGCTTTTTTGct  
cgagctggcgaattcc  
>CD\_NM\_001837.2:1190  
CgCctGcgagtctGGtatGCCCCACAAATGTGGCTATCCTTTTTCAAGAGAAAGGATAGCCACATTGTAGGGTTTTTTGct  
cgagctggcgaattcc  
>CD\_NM\_000579:377  
CgCctGcgagtctGGtatGATCCAATCTATGACATCAATTATTCAAGAGATAATTGATGTCATAGATTGGACTTTTTTGct  
cgagctggcgaattcc  
>CD\_NM\_000579:627  
CgCctGcgagtctGGtatGCGCCGCCAGTGGGACTTTGGATTCAAGAGATCCAAAGTCCCCTGGGCGGCATTTTTTGct  
cgagctggcgaattcc  
>CD\_NM\_000579:629  
CgCctGcgagtctGGtatGACGCCAGTGGGACTTTGGAAATTC AAGAGATTTCCAAAGTCCCCTGGGCGTTTTTTGct  
cgagctggcgaattcc  
>CD\_NM\_000579.1:377  
CgCctGcgagtctGGtatGCCCAATCTATGACATCAATTATTTCAAGAGAATAATTGATGTCATAGATTGGATTTTTTGct  
cgagctggcgaattcc  
>CD\_NM\_000579.1:746  
CgCctGcgagtctGGtatGAGTCCATGCTGTGTTTTGCTTTATTCAAGAGATAAAGCAAACACAGCATGGACGTTTTTTGct  
cgagctggcgaattcc  
>CD\_NM\_000579.1:900  
CgCctGcgagtctGGtatGCTTCCATACAGTCAGTATCAATTTCAAGAGAATTGATACTGACTGTATGGAAATTTTTTGct  
cgagctggcgaattcc  
>CD\_NM\_000579.1:633  
CgCctGcgagtctGGtatGAAGTGGGACTTTGGAAATACAATTC AAGAGATTTGATTTCCAAAGTCCCCTGTTTTTTGct  
cgagctggcgaattcc  
>CD\_NM\_000579.1:1312  
CgCctGcgagtctGGtatGACTTCTGCAAAATGCTGTTCTATTTCAAGAGAATAGAACAGCATTTGCAGAAGCTTTTTTGct  
cgagctggcgaattcc  
>CD\_NM\_000579.1:629  
CgCctGcgagtctGGtatGAGCCCAGTGGGACTTTGGAAATTTCAAGAGAATTTCCAAAGTCCCCTGGGCGTTTTTTGct  
cgagctggcgaattcc  
>CD\_NM\_000579.1:977  
CgCctGcgagtctGGtatGACTTGTCATGGTCATCTGCTACTTCAAGAGAGTAGCAGATGACCATGACAAGCTTTTTTGct  
cgagctggcgaattcc  
>CD\_NM\_000579.1:1268  
CgCctGcgagtctGGtatGAAGAACTACCTCTTAGTCTTCTTCAAGAGAGAAGACTAAGAGGTAGTTCTGTTTTTTGct  
cgagctggcgaattcc  
>CD\_NM\_000579.1:971  
CgCctGcgagtctGGtatGACCGCTGCTTGTCATGGTCATCTTCAAGAGAGATGACCATGACAAGCAGCGGCTTTTTTGct  
cgagctggcgaattcc  
>CD\_NM\_000579.1:990  
CgCctGcgagtctGGtatGCTCTGCTACTCGGGAATCCTAATTC AAGAGATTAGGATTC CCGAGTAGCAGATTTTTTTGct  
cgagctggcgaattcc  
>CD\_NM\_000579.1:923  
CgCctGcgagtctGGtatGATGGAAGAAATTC CAGACATTATTCAAGAGATAATGTCTGGAAATTTCTCCAGTTTTTTGct  
cgagctggcgaattcc  
>CD\_NM\_000579.1:716

CgCctGcgagtctGGtatGACTCCTGACAATCGATAGGTACTTCAAGAGAGTACCTATCGATTGTCAGGAGGTTTTTGct  
cgagctggcgaattcc  
>CD\_NM\_000579.1:631  
CgCctGcgagtctGGtatGACCAGTGGGACTTTGGAAATACTTCAAGAGAGTATTTCCAAAGTCCCCTGGGTTTTTGct  
cgagctggcgaattcc  
>CD\_NM\_000579.1:694  
CgCctGcgagtctGGtatGCCTCTGGAATCTTCTTCATCATTTTCAAGAGAATGATGAAGAAGATTCCAGAGATTTTTTGct  
cgagctggcgaattcc  
>CD\_NM\_000579.1:533  
CgCctGcgagtctGGtatGCAGGCTGAAGAGCATGACTGACTTCAAGAGAGTCAGTCATGCTCTTCAGCCTTTTTTTGct  
cgagctggcgaattcc  
>CD\_NM\_000579.1:1067  
CgCctGcgagtctGGtatGATTCACCATCATGATTGTTTATTTCAAGAGAATAAACAATCATGATGGTGAAGTTTTTGct  
cgagctggcgaattcc  
>CD\_NM\_000579.1:827  
CgCctGcgagtctGGtatGATTTGCGTCTCTCCAGGAATCTTCAAGAGAGATTCCTGGGAGAGACGCAAACTTTTTGct  
cgagctggcgaattcc  
>CD\_NM\_000579.1:1013  
CgCctGcgagtctGGtatGCACTCTGCTTCGGTGTGCGAAATTTCAAGAGAATTCGACACCGAAGCAGAGTTTTTTGct  
cgagctggcgaattcc  
>CD\_NM\_000579.1:965  
CgCctGcgagtctGGtatGAGTCCTGCCGCTGCTTGTTCATGTTCAAGAGACATGACAAGCAGCGGCAGGACTTTTTGct  
cgagctggcgaattcc  
>CD\_NM\_000579.1:829  
CgCctGcgagtctGGtatGCTGCGTCTCTCCAGGAATCATTTTCAAGAGAATGATTCCTGGGAGAGACGCAATTTTTTGct  
cgagctggcgaattcc  
>CD\_NM\_000579.1:748  
CgCctGcgagtctGGtatGCCATGCTGTGTTGCTTTAAATTTCAAGAGATTTAAAGCAAACACAGCATGGATTTTTTGct  
cgagctggcgaattcc  
>CD\_NM\_000579.1:505  
CgCctGcgagtctGGtatGCGGTCATCCTCATCCTGATAAAATTTCAAGAGATTTATCAGGATGAGGATGACCATTTTTTGct  
cgagctggcgaattcc  
>CD\_NM\_000579.1:506  
CgCctGcgagtctGGtatGAGTCATCCTCATCCTGATAAACTTCAAGAGAGTTTATCAGGATGAGGATGACCTTTTTTGct  
cgagctggcgaattcc  
>CD\_NM\_000579.1:908  
CgCctGcgagtctGGtatGAAGTCAGTATCAATTCTGGAAGTTCAAGAGACTTCCAGAATTGATACTGACTGTTTTTGct  
cgagctggcgaattcc  
>CD\_NM\_000579.1:910  
CgCctGcgagtctGGtatGATCAGTATCAATTCTGGAAGAATTTCAAGAGATTCCTCCAGAATTGATACTGACTTTTTTGct  
cgagctggcgaattcc  
>CD\_NM\_000579.1:902  
CgCctGcgagtctGGtatGCCATACAGTCAGTATCAATTCTTCAAGAGAGAATTGATACTGACTGTATGGATTTTTTGct  
cgagctggcgaattcc  
>CD\_NM\_000579.1:1354  
CgCctGcgagtctGGtatGCGCGAGCAAGCTCAGTTTACACTTCAAGAGAGTGTAAGTGAAGCTTGCTCGCTTTTTTGct  
cgagctggcgaattcc  
>CD\_NM\_000579.1:568  
CgCctGcgagtctGGtatGCCCTGGCCATCTCTGACCTGTTTTTCAAGAGAAACAGGTCAGAGATGGCCAGGTTTTTTGct  
cgagctggcgaattcc  
>CD\_NM\_000579.1:502  
CgCctGcgagtctGGtatGCGCTGGTCATCCTCATCCTGATTTTCAAGAGAATCAGGATGAGGATGACCAGCATTTTTTGct  
cgagctggcgaattcc  
>CD\_NM\_000579.1:1301

CgCctGcgagtctGGtatGAATTGCCAAACGCTTCTGCAAATTC AAGAGATTTGCAGAAGCGTTTGGCAATGTTTTTGct  
cgagctggcgaattcc  
>CD\_NM\_004367:917  
CgCctGcgagtctGGtatGCGAGCTACTCTTTGGTTTCTTTTCAAGAGAAAAGAAACCAAAGAGTAGCTCATTGTTTTGct  
cgagctggcgaattcc  
>CD\_NM\_004367.3:789  
CgCctGcgagtctGGtatGAAGTCATCATCTCCAGCTCAACTTCAAGAGAGTTGAGCTGGAGATGATGACTGTTTTTGct  
cgagctggcgaattcc  
>CD\_NM\_004367.3:537  
CgCctGcgagtctGGtatGAAGACATCCTCTTTGTTCTTACTTCAAGAGAGTAAGAACAAAGAGGATGTCTGTTTTTGct  
cgagctggcgaattcc  
>CD\_NM\_004367.3:1222  
CgCctGcgagtctGGtatGCGGGCAGAAAGTTCAGAACTACTTCAAGAGAGTAGTTTCTGAACTTCTGCCATTTTTGct  
cgagctggcgaattcc  
>CD\_NM\_004367.3:961  
CgCctGcgagtctGGtatGCTGTTACACGTTTATTGTCAAATTC AAGAGATTTGACAATGAACGTGTAACAATTTTTGct  
cgagctggcgaattcc  
>CD\_NM\_004367.3:1047  
CgCctGcgagtctGGtatGCTGTGTTTCTGGCTTGTGTCAGATTTCAAGAGAATCTGACAAGCCAGAAACACAATTTTTGct  
cgagctggcgaattcc  
>CD\_NM\_004367.3:535  
CgCctGcgagtctGGtatGCGCAGACATCCTCTTTGTTCTTTTCAAGAGAAAGAACAAAGAGGATGTCTGCATTTTTGct  
cgagctggcgaattcc  
>CD\_NM\_004367.3:867  
CgCctGcgagtctGGtatGCCCAGACTGTCTCGGAGCCATTTCAAGAGAAATGGGCTCCGAGACAGTCTGGTTTTTTGct  
cgagctggcgaattcc  
>CD\_NM\_004367.3:939  
CgCctGcgagtctGGtatGCCCTTTGATGTTTATGATATTTTCAAGAGAAATATCATGAACATCAAAGGGATTTTTGct  
cgagctggcgaattcc  
>CD\_NM\_004367.3:398  
CgCctGcgagtctGGtatGCCCAGGCTATTTGTACCGATTGTTCAAGAGACAATCGGTACAAATAGCCTGGATTTTTGct  
cgagctggcgaattcc  
>CD\_NM\_004367.3:1243  
CgCctGcgagtctGGtatGATTTCTGAAGATCTTGAAGGACTTCAAGAGAGTCTTCAAGATCTTCAAGAAAGTTTTGct  
cgagctggcgaattcc  
>CD\_NM\_004367.3:917  
CgCctGcgagtctGGtatGAAGCTACTCTTTGGTTTCTTTATTCAAGAGATAAAGAAACCAAAGAGTAGCTCTTTTTGct  
cgagctggcgaattcc  
>CD\_NM\_004367.3:663  
CgCctGcgagtctGGtatGCGCTGCTCCTGACTTGCATTAGTTCAAGAGACTAATGCAAGTCAGGAGCAGCATTGTTTTGct  
cgagctggcgaattcc  
>CD\_NM\_004367.3:1230  
CgCctGcgagtctGGtatGCGTTCAGAACTACTTTCTGAATTC AAGAGATTCAGAAAGTAGTTTCTGAACTTTTTTGct  
cgagctggcgaattcc  
>CD\_NM\_004367.3:325  
CgCctGcgagtctGGtatGATCAGTCAATACTTTCATATTACTTCAAGAGAGTAATATGAAGTATTGACTGACTTTTTGct  
cgagctggcgaattcc  
>CD\_NM\_004367.3:1118  
CgCctGcgagtctGGtatGCACCGATCCTGCCAGAGCGAAATTC AAGAGATTTGCTCTGGCAGGATCGTTTTTTTTGct  
cgagctggcgaattcc  
>CD\_NM\_004367.3:558  
CgCctGcgagtctGGtatGATCTCCCATTCTGGGCAGTGAGTTCAAGAGACTCACTGCCAGAATGGGAGAGTTTTTGct  
cgagctggcgaattcc  
>CD\_NM\_004367.3:940

CgCctGcgagtctGGtatGACCTTTGATGTTTCATGATATTTTTCAAGAGAAAATATCATGAACATCAAAGGGTTTTTGct  
cgagctggcgaattcc  
>CD\_NM\_004367.3:913  
CgCctGcgagtctGGtatGACTTGAGCTACTCTTTGGTTTCTTCAAGAGAGAAACCAAAGAGTAGCTCAAGCTTTTTTGct  
cgagctggcgaattcc  
>CD\_NM\_004367.3:930  
CgCctGcgagtctGGtatGATTTCTTTATCCCTTTGATGTTTTCAAGAGAAACATCAAAGGGATAAAGAACTTTTTTGct  
cgagctggcgaattcc  
>CD\_NM\_004367.3:411  
CgCctGcgagtctGGtatGCACCGATTGCCTACTCCTTGATTTCAAGAGAATCAAGGAGTAGGCAATCGGTATTTTTTGct  
cgagctggcgaattcc  
>CD\_NM\_004367.3:1362  
CgCctGcgagtctGGtatGCCGACAATGCGTCGTCCTTCACTTCAAGAGAGTGAAGGACGACGCATTGTCGTTTTTGct  
cgagctggcgaattcc  
>CD\_NM\_004367.3:508  
CgCctGcgagtctGGtatGCGACGTCTATCTCTTGAACATGTTCAAGAGACATGTTCAAGAGATAGACGTCTTTTTTGct  
cgagctggcgaattcc  
>CD\_NM\_004367.3:1045  
CgCctGcgagtctGGtatGACTTGTGTTTCTGGCTTGTCAAGAGACTGACAAGCCAGAAACACAAGCTTTTTTGct  
cgagctggcgaattcc  
>CD\_NM\_004367.3:327  
CgCctGcgagtctGGtatGAAGTCAATACTTCATATTACTCTTCAAGAGAGAGTAATATGAAGTATTGACTGTTTTTGct  
cgagctggcgaattcc  
>CD\_NM\_004367.3:1179  
CgCctGcgagtctGGtatGATTTCTGCACTGCTGCCTGAATTCAAGAGATTCAGGCAGCAGTGCAGGAAAGTTTTTGct  
cgagctggcgaattcc  
>CD\_NM\_004367.3:666  
CgCctGcgagtctGGtatGCGCTCCTGACTTGCATTAGCATTTCAGAGAAATGCTAATGCAAGTCAGGAGCATTTTTTGct  
cgagctggcgaattcc  
>CD\_NM\_004367.3:1069  
CgCctGcgagtctGGtatGCCCTCATAACATGGTCTGCTTTTTCAAGAGAAAGCAGGACCATGTTATGAGGATTTTTGct  
cgagctggcgaattcc  
>CD\_NM\_004367.3:1270  
CgCctGcgagtctGGtatGATGTGTGAGAAGGAAGTACAAGTTCAAGAGACTTGTACTTCTCTCACACACTTTTTTGct  
cgagctggcgaattcc  
>CD\_NM\_004367.3:1264  
CgCctGcgagtctGGtatGACTGTGGTGTGTGAGAAGGAAGTTCAAGAGACTTCTTCTCACACACCACAGGTTTTTGct  
cgagctggcgaattcc  
>CD\_NM\_004367.3:541  
CgCctGcgagtctGGtatGAATCCTCTTTGTTCTTACTCTTCTTCAAGAGAGAGTAAGAACAAAGAGGATGTTTTTGct  
cgagctggcgaattcc  
>CD\_NM\_004367.3:631  
CgCctGcgagtctGGtatGCGGCATCTATGCCATCAACTTTTTCAAGAGAAAAGTTGATGGCATAGATGCCTTTTTTGct  
cgagctggcgaattcc  
>CD\_NM\_004367.3:323  
CgCctGcgagtctGGtatGATGTCAGTCAATACTTCATATTTTTCAAGAGAAAATATGAAGTATTGACTGACACTTTTTGct  
cgagctggcgaattcc  
>CD\_NM\_001838:290  
CgCctGcgagtctGGtatGCTGGGCTGGTCGTGTTGACCTATTCAAGAGATAGGTCAACACGACCAGCCATTTTTTGct  
cgagctggcgaattcc  
>CD\_NM\_001838:295  
CgCctGcgagtctGGtatGATGGTCGTGTTGACCTATATCTTTCAAGAGAAGATATAGGTCAACACGACCAGTTTTTGct  
cgagctggcgaattcc  
>CD\_NM\_001838.2:193

CgCctGcgagtctGGtatGCCGAGTCTTTGTGCTCCAAGAATTCAAGAGATTCTTGGAGCACAAAGACTCGATTTTTTGct  
cgagctggcgaattcc  
>CD\_NM\_001838.2:569  
CgCctGcgagtctGGtatGACGCGTCCTTCTCATCAGCAAGTTCAAGAGACTTGCTGATGAGAAGGACGCGTTTTTTGct  
cgagctggcgaattcc  
>CD\_NM\_001838.2:686  
CgCctGcgagtctGGtatGACGATGCTCTCTCATCACAGAGTTCAAGAGACTCTGTGATGAGAGAGCATCGCTTTTTTGct  
cgagctggcgaattcc  
>CD\_NM\_001838.2:701  
CgCctGcgagtctGGtatGAACAGAGCATGTGGAGGCCTTTTTCAAGAGAAAAGGCCTCCACATGCTCTGTGTTTTTTGct  
cgagctggcgaattcc  
>CD\_NM\_001838.2:916  
CgCctGcgagtctGGtatGACCAGACGGTGGCCAACCTTCAATTCAAGAGATTGAAGTTGGCCACCGTCTGGGTTTTTTGct  
cgagctggcgaattcc  
>CD\_NM\_001838.2:684  
CgCctGcgagtctGGtatGCTGCGATGCTCTCTCATCACAGTTCAAGAGACTGTGATGAGAGAGCATCGCATTTTTTTGct  
cgagctggcgaattcc  
>CD\_NM\_001838.2:737  
CgCctGcgagtctGGtatGAGCCCAGATGGTGATCGGCTTTTTCAAGAGAAAAGCCGATCACCATCTGGGCCTTTTTTGct  
cgagctggcgaattcc  
>CD\_NM\_001838.2:292  
CgCctGcgagtctGGtatGAGCTGGTCGTGTTGACCTATATTTCAAGAGAATATAGGTCAACACGACCAGCCTTTTTTGct  
cgagctggcgaattcc  
>CD\_NM\_001838.2:635  
CgCctGcgagtctGGtatGACCAGAGCTCCTGTACAGTGACTTCAAGAGAGTCACTGTACAGGAGCTCTGGGTTTTTTGct  
cgagctggcgaattcc  
>CD\_NM\_001838.2:370  
CgCctGcgagtctGGtatGAAGACATCCTCTTCTCCTGACTTCAAGAGAGTCAGGAGGAAGAGGATGTCGTTTTTTTGct  
cgagctggcgaattcc  
>CD\_NM\_001838.2:679  
CgCctGcgagtctGGtatGCAGCGATGCGATGCTCTCTCATTTCAAGAGAATGAGAGAGCATCGCATCGCTTTTTTTGct  
cgagctggcgaattcc  
>CD\_NM\_001838.2:95  
CgCctGcgagtctGGtatGAGTGGTGGCTCTCCTTGTCATTTTCAAGAGAAATGACAAGGAGAGCCACCACCTTTTTTGct  
cgagctggcgaattcc  
>CD\_NM\_001838.2:290  
CgCctGcgagtctGGtatGCGGGCTGGTCGTGTTGACCTATTTCAAGAGAATAGGTCAACACGACCAGCCCATTTTTTGct  
cgagctggcgaattcc  
>CD\_NM\_001838.2:922  
CgCctGcgagtctGGtatGAGGTGGCCAACCTTCAACATCACTTCAAGAGAGTGATGTTGAAGTTGGCCACCGTTTTTTGct  
cgagctggcgaattcc  
>CD\_NM\_001838.2:947  
CgCctGcgagtctGGtatGCAGCACCTGTGAGCTCAGTAAGTTCAAGAGACTTACTGAGCTCACAGGTGCTATTTTTTGct  
cgagctggcgaattcc  
>CD\_NM\_001838.2:1154  
CgCctGcgagtctGGtatGATCCATGAGTGTGGAGCCGAGTTCAAGAGACTCGGCCTCCACACTCATGGAGTTTTTTGct  
cgagctggcgaattcc  
>CD\_NM\_001838.2:244  
CgCctGcgagtctGGtatGCCCTATCATGTACTCCATCATTTCAAGAGAATGATGGAGTACATGATAGGGATTTTTTTGct  
cgagctggcgaattcc  
>CD\_NM\_001838.2:496  
CgCctGcgagtctGGtatGCCCTACTTCTTTGCATCAGCATTTCAAGAGAATGCTGATGCAAAGAAGTAGGATTTTTTTGct  
cgagctggcgaattcc  
>CD\_NM\_001838.2:485



CgCctGcgagtctGGtatGAAGTGGCATGCTCCTACTTCTTTTCAAGAGAAAGAAGTAGGAGCATGCCACTGTTTTTGct  
cgagctggcgaattcc  
>CD\_NM\_001838.2:536  
CgCctGcgagtctGGtatGAGTCCAGGCTGTCTCAGCTCACTTCAAGAGAGTGAGCTGAGACAGCCTGGACGTTTTTGct  
cgagctggcgaattcc  
>CD\_NM\_001838.2:146  
CgCctGcgagtctGGtatGAACGGACGATTACATCGGAGACTTCAAGAGAGTCTCCGATGTAATCGTCCGTGTTTTTGct  
cgagctggcgaattcc  
>CD\_NM\_001838.2:1070  
CgCctGcgagtctGGtatGCCTCTTCAAGCTCTTCAAGGACTTCAAGAGAGTCTTGAAGAGCTTGAAGAGATTTTTTGct  
cgagctggcgaattcc  
>CD\_NM\_001838.2:338  
CgCctGcgagtctGGtatGAACCGATACCTACCTGCTCAACTTCAAGAGAGTTGAGCAGGTAGGTATCGGTCTTTTTTGct  
cgagctggcgaattcc  
>CD\_NM\_001838.2:302  
CgCctGcgagtctGGtatGATTGACCTATATCTATTTCAAGTTCAAGAGACTTGAATAGATATAGGTCAACTTTTTTGct  
cgagctggcgaattcc  
>CD\_NM\_001838.2:563  
CgCctGcgagtctGGtatGACGTGCCCGCTCCTTCTCATCTTCAAGAGAGATGAGAAGGACCGGGCACGGTTTTTGct  
cgagctggcgaattcc  
>CD\_NM\_001838.2:500  
CgCctGcgagtctGGtatGCCTTCTTTGCATCAGCATTGACTTCAAGAGAGTCAATGCTGATGCAAAGAAGTTTTTGct  
cgagctggcgaattcc  
>CD\_NM\_001838.2:1019  
CgCctGcgagtctGGtatGATGCGTCAACCCTTTCTTGTACTTCAAGAGAGTACAAGAAAGGGTTGACGCAGTTTTTGct  
cgagctggcgaattcc  
>CD\_NM\_001838.2:451  
CgCctGcgagtctGGtatGCGCTCATCTTTGCCATCTACAATTCAAGAGATTGTAGATGGCAAAGATGAGCTTTTTTGct  
cgagctggcgaattcc  
>CD\_NM\_001838.2:191  
CgCctGcgagtctGGtatGATTGAGTCTTTGTGCTCCAAGTTCAAGAGACTTGGAGCACAAAGACTCGAACTTTTTTGct  
cgagctggcgaattcc  
>CD\_NM\_001838.2:1061  
CgCctGcgagtctGGtatGACGCAACGATCTCTTCAAGCTCTTCAAGAGAGAGCTTGAAGAGATCGTTGCGGTTTTTGct  
cgagctggcgaattcc  
>CD\_NM\_001838.2:860  
CgCctGcgagtctGGtatGAGCTGTGGTCTGCTTTCATATTCAAGAGATATGAAGACCACGACCACAGCGTTTTTGct  
cgagctggcgaattcc  
>CD\_NM\_005201.2:757  
CgCctGcgagtctGGtatGCCTTTATGTTCTGCTACATTAATTCAAGAGATTAATGTAGCAGAACATAAAGATTTTTTGct  
cgagctggcgaattcc  
>CD\_NM\_005201.2:642  
CgCctGcgagtctGGtatGACCTCTGAAGATGGTGTCTACTTCAAGAGAGTAGAACACCATCTTCAGAGGCTTTTTTGct  
cgagctggcgaattcc  
>CD\_NM\_005201.2:392  
CgCctGcgagtctGGtatGAACCTACTATCTGCTGGACCAGTTCAAGAGACTGGTCCAGCAGATAGTAGGTCTTTTTTGct  
cgagctggcgaattcc  
>CD\_NM\_005201.2:257  
CgCctGcgagtctGGtatGCGTATTCAGTCTTCTGGGAAACTTCAAGAGAGTTTCCCAGAAGACTGAATACATTTTTTGct  
cgagctggcgaattcc  
>CD\_NM\_005201.2:136  
CgCctGcgagtctGGtatGCCCTCAGTGTGACAACAGTGACTTCAAGAGAGTCACTGTTGTCACTGAGGTTTTTGct  
cgagctggcgaattcc  
>CD\_NM\_005201.2:530

CgCtGcgagtctGGtatGCGCCGTGTATGCCCTAAAGGTGTTCAAGAGACACCTTTAGGGCATAACGGCATTGct  
cgagctggcgaattcc  
>CD\_NM\_005201.2:752  
CgCtGcgagtctGGtatGAACCATCTTTATGTTCTGCTACTTCAAGAGAGTAGCAGAACATAAAGATGGTGTGct  
cgagctggcgaattcc  
>CD\_NM\_005201.2:457  
CgCtGcgagtctGGtatGCTTACATTGGCTTCTACAGCAGTTCAAGAGACTGCTGTAGAAGCCAATGTAATGct  
cgagctggcgaattcc  
>CD\_NM\_005201.2:754  
CgCtGcgagtctGGtatGACATCTTTATGTTCTGCTACATTTCAAGAGAATGTAGCAGAACATAAAGATGGTGTGct  
cgagctggcgaattcc  
>CD\_NM\_005201.2:998  
CgCtGcgagtctGGtatGATGTGTGAACCTGTTATCTATTTCAAGAGAATAGATAACAGGGTTCACACAGTGTGct  
cgagctggcgaattcc  
>CD\_NM\_005201.2:683  
CgCtGcgagtctGGtatGCCAACAGACTTTGAAGTGAAGTTCAAGAGACTTCCACTTCAAAGTCTGTTGATGct  
cgagctggcgaattcc  
>CD\_NM\_005201.2:494  
CgCtGcgagtctGGtatGACTCATGAGTGTGGACAGGTACTTCAAGAGAGTACCTGTCCACACTCATGAGTGTGct  
cgagctggcgaattcc  
>CD\_NM\_005201.2:985  
CgCtGcgagtctGGtatGACTTTACTCACTGCTGTGTGAATTCAAGAGATTACACAGCAGTGAGTAAAGTGTGct  
cgagctggcgaattcc  
>CD\_NM\_005201.2:411  
CgCtGcgagtctGGtatGAAGTGGGTGTTGGGACTGTAATTCAAGAGATTACAGTCCCAAACACCCACTGTGct  
cgagctggcgaattcc  
>CD\_NM\_005201.2:736  
CgCtGcgagtctGGtatGACTTGTTGATCCCATTACCATTTCAAGAGAATGGTGAATGGGATCAACAAGCTGTGct  
cgagctggcgaattcc  
>CD\_NM\_005201.2:290  
CgCtGcgagtctGGtatGACTGGTCCTTGTGGTCTGCAAGTTCAAGAGACTTGCAGACCACAAGGACCAGTGTGct  
cgagctggcgaattcc  
>CD\_NM\_005201.2:655  
CgCtGcgagtctGGtatGATGTTCTACAGTGTATTTCATTTTCAAGAGAAATGAATAACACTGTAGAACACTGTGct  
cgagctggcgaattcc  
>CD\_NM\_005201.2:959  
CgCtGcgagtctGGtatGCGCCACCCATGTCACAGAAATCTTCAAGAGAGATTTCTGTGACATGGGTGGCATTGct  
cgagctggcgaattcc  
>CD\_NM\_005201.2:746  
CgCtGcgagtctGGtatGACCATTACCATCTTTATGTTCTTCAAGAGAGAACATAAAGATGGTGAATGGGTTGct  
cgagctggcgaattcc  
>CD\_NM\_005201.2:419  
CgCtGcgagtctGGtatGATTTGGGACTGTAATGTGCAAATTCAAGAGATTTGCACATTACAGTCCCAAACGTGct  
cgagctggcgaattcc  
>CD\_NM\_005201.2:292  
CgCtGcgagtctGGtatGCGGTCCCTTGTGGTCTGCAAGAATTCAAGAGATTTCTGCAGACCACAAGGACCATTGct  
cgagctggcgaattcc  
>CD\_NM\_005201.2:895  
CgCtGcgagtctGGtatGCCCTCACTTCCTTGCACAGTATTTCAAGAGAATACTGTGCAAGGAAGTGAAGTGTGct  
cgagctggcgaattcc  
>CD\_NM\_005201.2:905  
CgCtGcgagtctGGtatGATTGCACAGTATGCACATCTTGTTCAGAGACAAGATGTGCATACTGTGCAAGTGTGct  
cgagctggcgaattcc  
>CD\_NM\_005201.2:838

CgCctGcgagtctGGtatGCGCTCATTGTGGTCATTGCATCTTCAAGAGAGATGCAATGACCACAATGAGCATTTTTTGct  
cgagctggcgaattcc  
>CD\_NM\_005201.2:748  
CgCctGcgagtctGGtatGAATTCACCATCTTTATGTTCTGTTCAAGAGACAGAACATAAAGATGGTGAATGTTTTGct  
cgagctggcgaattcc  
>CD\_NM\_005201.2:305  
CgCctGcgagtctGGtatGATGCAAGAAGCTGAGGAGCATCTTCAAGAGAGATGCTCCTCAGCTTCTTGCAAGTTTTGct  
cgagctggcgaattcc  
>CD\_NM\_005201.2:1073  
CgCctGcgagtctGGtatGCTGCAGCCAAATCTTCAACTACTTCAAGAGAGTAGTTGAAGATTTGGCTGCAATTTTTGct  
cgagctggcgaattcc  
>CD\_NM\_005201.2:189  
CgCctGcgagtctGGtatGACCTGTGATGCGGAACTTATTCTTCAAGAGAGAATAAGTTCCGCATCACAGGGTTTTGct  
cgagctggcgaattcc  
>CD\_NM\_005201.2:218  
CgCctGcgagtctGGtatGCGGCAAGTTGCTCCTTGCTGTCTTCAAGAGAGACAGCAAGGAGCAACTTGCCATTTTTGct  
cgagctggcgaattcc  
>CD\_NM\_005201.2:611  
CgCctGcgagtctGGtatGCACCATCCCATTGCTAGTGTTTTTCAAGAGAAAACACTAGCAATGGGATGGTATTTTTGct  
cgagctggcgaattcc  
>CD\_NM\_005201.2:197  
CgCctGcgagtctGGtatGCGCGGAACTTATTCAGACAAATTTCAAGAGAATTTGTCTGAATAAGTTCCGCATTTTTGct  
cgagctggcgaattcc  
>CD\_NM\_005201.2:149  
CgCctGcgagtctGGtatGCACAGTGACCGACTACTACTACTTCAAGAGAGTAGTAGTAGTCGGTCACTGTTTTTTTTGct  
cgagctggcgaattcc  
>CD\_NM\_005201.2:326  
CgCctGcgagtctGGtatGAACAGATGTATACCTCTTGAACCTCAAGAGAGTTCAAGAGGTATACATCTGTGTTTTGct  
cgagctggcgaattcc  
>CD\_NM\_006641:1174  
CgCctGcgagtctGGtatGACAGGCCAGTGGGTTTCATTTTTCAAGAGAAAATGAAACCCACTGGGCCTGGTTTTGct  
cgagctggcgaattcc  
>CD\_NM\_006641:1178  
CgCctGcgagtctGGtatGACCCAGTGGGTTTCATTTACAATTTCAAGAGATTGTAAATGAAACCCACTGGGCTTTTTGct  
cgagctggcgaattcc  
>CD\_NM\_031200.1:1178  
CgCctGcgagtctGGtatGACCAGTGGGTTTCATTTACAAGTTCAAGAGACTTGTAAATGAAACCCACTGGGTTTTGct  
cgagctggcgaattcc  
>CD\_NM\_031200.1:354  
CgCctGcgagtctGGtatGAAGTCTTGTATCCTTGTCTACTTCAAGAGAGTAGACAAGGATAACAAGACTGTTTTGct  
cgagctggcgaattcc  
>CD\_NM\_031200.1:936  
CgCctGcgagtctGGtatGAACCGTCTTTGCTTGTCTCAGTTCAAGAGACTGAGACAAGACAAAGACGGTCTTTTTGct  
cgagctggcgaattcc  
>CD\_NM\_031200.1:839  
CgCctGcgagtctGGtatGCGGTCATGGCTTGCTGTATACTTCAAGAGAGTATAGCAGCAAGCCATGACCATTTTTGct  
cgagctggcgaattcc  
>CD\_NM\_031200.1:202  
CgCctGcgagtctGGtatGAACTATGGCTCTGAATCCACATTTCAAGAGAATGTGGATTCAGAGCCATAGTCTTTTTGct  
cgagctggcgaattcc  
>CD\_NM\_031200.1:495  
CgCctGcgagtctGGtatGATTCCAGACCTTCATGTGCAAGTTCAAGAGACTTGCACATGAAGGTCTGGAACTTTTGct  
cgagctggcgaattcc  
>CD\_NM\_031200.1:852

CgCctGcgagtctGGtatGATGCTATACCATCATCATTCACTTCAAGAGAGTGAATGATGATGGTATAGCAGTTTTTGGct  
cgagctggcgaattcc  
>CD\_NM\_031200.1:615  
CgCctGcgagtctGGtatGCGCACATACTTGGAGGGAGAAATTC AAGAGATTTCTCCCTCCAAGTATGTGCTTTTTTGGct  
cgagctggcgaattcc  
>CD\_NM\_031200.1:236  
CgCctGcgagtctGGtatGCCTACGTTAACTTCAACTTCACTTCAAGAGAGTGAAGTTGAAGTTAACGTAGTTTTTGGct  
cgagctggcgaattcc  
>CD\_NM\_031200.1:938  
CgCctGcgagtctGGtatGACGTCTTTGTCTTGTCTCAGTTTTTCAAGAGAACTGAGACAAGACAAAGACGGTTTTTGGct  
cgagctggcgaattcc  
>CD\_NM\_031200.1:687  
CgCctGcgagtctGGtatGCGCTCTCTGCATCCCAGAAATCTTCAAGAGAGATTTCTGGGATGCAGAGAGCATTTTTGGct  
cgagctggcgaattcc  
>CD\_NM\_031200.1:930  
CgCctGcgagtctGGtatGCGTCTTGACCGTCTTTGTCTTGTTC AAGAGACAAGACAAAGACGGTCAGGACATTTTTGGct  
cgagctggcgaattcc  
>CD\_NM\_031200.1:432  
CgCctGcgagtctGGtatGCGCTGACCTCCTCTTTCTTGTCTTCAAGAGAGACAAGAAAGAGGAGGTCAGCATTTTTGGct  
cgagctggcgaattcc  
>CD\_NM\_031200.1:570  
CgCctGcgagtctGGtatGATGCATCAGCGTGGACAGGTACTTCAAGAGAGTACCTGTCCACGCTGATGCATTTTTGGct  
cgagctggcgaattcc  
>CD\_NM\_031200.1:741  
CgCctGcgagtctGGtatGCGCTATCTGCACCATGGTTTTACTTCAAGAGAGTAAACCATGGTGCAGATAGCATTTTTGGct  
cgagctggcgaattcc  
>CD\_NM\_031200.1:1086  
CgCctGcgagtctGGtatGCTGCCTGAACCCTGTTCTCTATTTCAAGAGAATAGAGAACAGGGTTCAGGCAATTTTTGGct  
cgagctggcgaattcc  
>CD\_NM\_031200.1:219  
CgCctGcgagtctGGtatGAACATCTTCCATGGAAGACTACTTCAAGAGAGTAGTCTTCCATGGAAGATGTGTTTTTGGct  
cgagctggcgaattcc  
>CD\_NM\_031200.1:921  
CgCctGcgagtctGGtatGAACCATCACTGTCCTGACCGTCTTCAAGAGAGACGGTCAGGACAGTGATGGTCTTTTTGGct  
cgagctggcgaattcc  
>CD\_NM\_031200.1:387  
CgCctGcgagtctGGtatGCAGAGTGAAGACCATGACCGACTTCAAGAGAGTCGGTCATGGTCTTCACTTTTTTGGct  
cgagctggcgaattcc  
>CD\_NM\_031200.1:602  
CgCctGcgagtctGGtatGACCAGGCCATGAGAGCACATACTTCAAGAGAGTATGTGCTCTCATGGCCTGGGTTTTTGGct  
cgagctggcgaattcc  
>CD\_NM\_031200.1:1174  
CgCctGcgagtctGGtatGAAGGCCAGTGGGTTTCATTTATTCAAGAGATAAATGAAACCCACTGGGCCTGTTTTTGGct  
cgagctggcgaattcc  
>CD\_NM\_031200.1:1220  
CgCctGcgagtctGGtatGCGTCGTCTATGTTGCTGGAGACTTCAAGAGAGTCTCCAGCAACATAGACGACATTTTTGGct  
cgagctggcgaattcc  
>CD\_NM\_031200.1:600  
CgCctGcgagtctGGtatGCGCCCAGGCCATGAGAGCACATTTCAAGAGAATGTGCTCTCATGGCCTGGGCATTTTTGGct  
cgagctggcgaattcc  
>CD\_NM\_031200.1:170  
CgCctGcgagtctGGtatGCCTTACAAGCCCTATTCTTAATTCAAGAGATTAGGAATAGGGCTTGTGAAGTTTTTGGct  
cgagctggcgaattcc  
>CD\_NM\_031200.1:283

CgCctGcgagtctGGtatGATCAGGCAGTTTGGCAGCCATTTTCAAGAGAAATGGCTCGCAAACCTGCCTGACTTTTTTGct  
cgagctggcgaattcc  
>CD\_NM\_031200.1:528  
CgCctGcgagtctGGtatGAATGTACAAGATGAACCTTCTACTTCAAGAGAGTAGAAGTTCATCTTGTACATGTTTTTGct  
cgagctggcgaattcc  
>CD\_NM\_031200.1:689  
CgCctGcgagtctGGtatGATCTCTGCATCCCAGAAATCTTTTTCAAGAGAAAGATTTCTGGGATGCAGAGAGTTTTTGct  
cgagctggcgaattcc  
>CD\_NM\_031200.1:474  
CgCctGcgagtctGGtatGCGCTGCTGCTGACCAGTGGAAAGTTCAAGAGACTTCCACTGGTCAGCAGCAGCATTTTTTGct  
cgagctggcgaattcc  
>CD\_NM\_031200.1:1023  
CgCctGcgagtctGGtatGCGCCGTTTCCACCAACATTGACTTCAAGAGAGTCAATGTTGGTGGAAACGGCATTTTTTGct  
cgagctggcgaattcc  
>CD\_NM\_031200.1:953  
CgCctGcgagtctGGtatGATCAGTTTCCCTACAACCTGCATTTCAAGAGAATGCAGTTGTAGGGAAACTGAGTTTTTGct  
cgagctggcgaattcc  
>CD\_NM\_031200.1:231  
CgCctGcgagtctGGtatGAGAAGACTACGTTAACTTCAACTTCAAGAGAGTTGAAGTTAACGTAGTCTTCCTTTTTGct  
cgagctggcgaattcc  
>CD\_NM\_005944:336  
CgCctGcgagtctGGtatGACCCTCATTGTGACATGGCAGATTCAAGAGATCTGCCATGTCACAATGAGGGCTTTTTGct  
cgagctggcgaattcc  
>CD\_NM\_001004196.1:130  
CgCctGcgagtctGGtatGCACAGCTACACTCCTAGGAAAGTTCAAGAGACTTTCCTAGGAGTGTAGCTGTATTTTTGct  
cgagctggcgaattcc  
>CD\_NM\_001004196.1:708  
CgCctGcgagtctGGtatGAAGTGACTCTGTCTCACCCAAATTTCAAGAGATTTGGGTGAGACAGAGTCACTGTTTTTGct  
cgagctggcgaattcc  
>CD\_NM\_001004196.1:336  
CgCctGcgagtctGGtatGACCTCATTGTGACATGGCAGAATTTCAAGAGATTTCTGCCATGTCACAATGAGGGTTTTTGct  
cgagctggcgaattcc  
>CD\_NM\_001004196.1:822  
CgCctGcgagtctGGtatGATGTGACCGACTTTAAGCAAACCTTCAAGAGAGTTTGCCTTAAAGTCGGTCACAGTTTTTGct  
cgagctggcgaattcc  
>CD\_NM\_001004196.1:710  
CgCctGcgagtctGGtatGATGACTCTGTCTCACCCAAATGTTCAAGAGACATTTGGGTGAGACAGAGTCACTTTTTTGct  
cgagctggcgaattcc  
>CD\_NM\_001004196.1:334  
CgCctGcgagtctGGtatGCGCCCTCATTGTGACATGGCAGTTCAAGAGACTGCCATGTCACAATGAGGGCTTTTTTGct  
cgagctggcgaattcc  
>CD\_NM\_001004196.1:565  
CgCctGcgagtctGGtatGATGCCTCACCGTCTATGTACAGTTCAAGAGACTGTACATAGACGGTGAGGCAGTTTTTGct  
cgagctggcgaattcc  
>CD\_NM\_001004196.1:424  
CgCctGcgagtctGGtatGCGCCTATAAGGACAAGATAAACTTCAAGAGAGTTTATCTTGTCTTATAGGCATTTTTTGct  
cgagctggcgaattcc  
>CD\_NM\_001004196.1:182  
CgCctGcgagtctGGtatGCTGCCCTTCTGTCTATCTGTCTATTCAAGAGATAGACAGATGACAGAAGGGCATTTTTTTGct  
cgagctggcgaattcc  
>CD\_NM\_001004196.1:93  
CgCctGcgagtctGGtatGAGCTGACTCTGACCAGGACAATTTCAAGAGAATTTGTCTGGTCAGAGTCAGCCTTTTTTGct  
cgagctggcgaattcc  
>CD\_NM\_001004196.1:886

CgCtGcgagtctGGtatGAATTGTTCCCTGGTAATCTTTTCAAGAGAAAGAATTACCAGGGAAACAATGTTTTTGct  
cgagctggcgaattcc  
>CD\_NM\_001004196.1:913  
CgCtGcgagtctGGtatGACTAATCTCAATCTTACTGTACTTCAAGAGAGTACAGTAAGATTGAGATTAGGTTTTTGct  
cgagctggcgaattcc  
>CD\_NM\_001004196.1:919  
CgCtGcgagtctGGtatGATCAATCTTACTGTACTGGAAATTC AAGAGATTTCCAGTACAGTAAGATTGAGTTTTTGct  
cgagctggcgaattcc  
>CD\_NM\_001004196.1:745  
CgCtGcgagtctGGtatGCACCAGCATCCTCCATATCAAATTC AAGAGATTTGATATGGAGGATGCTGGTATTTTTTGct  
cgagctggcgaattcc  
>CD\_NM\_001004196.1:909  
CgCtGcgagtctGGtatGCCGTCTAATCTCAATCTTACTTTCAAGAGAAGTAAGATTGAGATTAGGACGATTTTTTGct  
cgagctggcgaattcc  
>CD\_NM\_001004196.1:287  
CgCtGcgagtctGGtatGATGTACACACCTGCTTCCTTAATTC AAGAGATTAAGGAAGCAGGTGTGTACAGTTTTTGct  
cgagctggcgaattcc  
>CD\_NM\_001004196.1:585  
CgCtGcgagtctGGtatGCGCCATAGTATCCCTTCACTATTCAAGAGATAGTGAAGGGATACTATGGGCTTTTTTGct  
cgagctggcgaattcc  
>CD\_NM\_001004196.1:714  
CgCtGcgagtctGGtatGATCTGTCTCACCCAAATGGGACTTCAAGAGAGTCCCATTTGGGTGAGACAGAGTTTTTGct  
cgagctggcgaattcc  
>CD\_NM\_001004196.1:471  
CgCtGcgagtctGGtatGAAACCATCACCTTCTGGAATATTTCAAGAGAATATTCAGAAGGTGATGGTTGTTTTTGct  
cgagctggcgaattcc  
>CD\_NM\_001004196.1:820  
CgCtGcgagtctGGtatGAACTGTGACCGACTTTAAGCAATTC AAGAGATTGCTTAAAGTCGGTCACAGCTTTTTTGct  
cgagctggcgaattcc  
>CD\_NM\_001004196.1:288  
CgCtGcgagtctGGtatGCGTACACACCTGCTTCCTTAAATTC AAGAGATTTAAGGAAGCAGGTGTGTACATTTTTTGct  
cgagctggcgaattcc  
>CD\_NM\_001004196.1:882  
CgCtGcgagtctGGtatGCAAGCATTGTTCCCTGGTAATTTCAAGAGAATACCAGGGAAACAATGCTTATTTTTTGct  
cgagctggcgaattcc  
>CD\_NM\_001004196.1:898  
CgCtGcgagtctGGtatGAGTAATCTTCTCGTCTAATCTTCAAGAGAGATTAGGACGAGAAGAATTACCTTTTTTGct  
cgagctggcgaattcc  
>CD\_NM\_001004196.1:925  
CgCtGcgagtctGGtatGATTACTGTACTGGAAACGTCACTTCAAGAGAGTGACGTTTCCAGTACAGTAAGTTTTTGct  
cgagctggcgaattcc  
>CD\_NM\_001004196.1:559  
CgCtGcgagtctGGtatGCACGGCCTGCCTCACCGTCTATTTCAAGAGAATAGACGGTGAGGCAGGCCGTTTTTTTGct  
cgagctggcgaattcc  
>CD\_NM\_001004196.1:613  
CgCtGcgagtctGGtatGATCTGAAGACCACCTAAATATCTTCAAGAGAGATATTTAGGTGGTCTTCAGAGTTTTTGct  
cgagctggcgaattcc  
>CD\_NM\_001004196.1:474  
CgCtGcgagtctGGtatGACATCACCTTCTGGAATATCACTTCAAGAGAGTGATATTCAGAAGGTGATGGTTTTTGct  
cgagctggcgaattcc  
>CD\_NM\_001004196.1:571  
CgCtGcgagtctGGtatGAACCGTCTATGTACAGCCATATTC AAGAGATATGGGCTGTACATAGACGGTGTTTTTTGct  
cgagctggcgaattcc  
>CD\_NM\_001004196.1:325

CgCctGcgagtctGGtatGCGCCCAGGAAGCCCTCATTGTGTTCAAGAGACACAATGAGGGCTTCTGGGCATTTTTGct  
cgagctggcgaattcc  
>CD\_NM\_001004196.1:746  
CgCctGcgagtctGGtatGCCAGCATCCTCCATATCAAAGTTCAAGAGACTTTGATATGGAGGATGCTGGTTTTTTGct  
cgagctggcgaattcc  
>CD\_NM\_001004196.1:680  
CgCctGcgagtctGGtatGATCCCTCGGTCAGGGATTGAAATTTCAAGAGATTTCAATCCCTGACCGAGGGACTTTTTGct  
cgagctggcgaattcc  
>CD\_NM\_001004196.1:145  
CgCctGcgagtctGGtatGCGGAAAGACCACCATCAATGATTTCAAGAGAATCATTGATGGTGGTCTTTCCTTTTTTTGct  
cgagctggcgaattcc  
>CD\_NM\_006404:788  
CgCctGcgagtctGGtatGCGCCAAACAAGCCGCTCCTACATTCAAGAGATGTAGGAGCGGCTTGTGGCTTTTTTTGct  
cgagctggcgaattcc  
>CD\_NM\_006404:879  
CgCctGcgagtctGGtatGACACAGGTGGACGGCGATGTTATTCAAGAGATAACATCGCCGTCCACCTGTGCTTTTTGct  
cgagctggcgaattcc  
>CD\_NM\_006404:551  
CgCctGcgagtctGGtatGAAGGGCTCTAGAGCCCATGTCTTTCAAGAGAAGACATGGGCTCTAGAGCCCTTTTTTTGct  
cgagctggcgaattcc  
>CD\_NM\_006404:743  
CgCctGcgagtctGGtatGATGCAGTATGTGCAGAAACATATTCAAGAGATATGTTTCTGCACATACTGCACTTTTTTGct  
cgagctggcgaattcc  
>CD\_NM\_006404.3:741  
CgCctGcgagtctGGtatGCGTGCAGTATGTGCAGAAACATTTCAAGAGAATGTTTCTGCACATACTGCACATTTTTTTGct  
cgagctggcgaattcc  
>CD\_NM\_006404.3:261  
CgCctGcgagtctGGtatGCAGACTTCATATGCTCCAGATCTTCAAGAGAGATCTGGAGCATATGAAGTCTTTTTTTGct  
cgagctggcgaattcc  
>CD\_NM\_006404.3:558  
CgCctGcgagtctGGtatGCAGAGCCCATGTCTTCTTCAAGAGATTCGAAGAAGACATGGGCTCTATTTTTTTGct  
cgagctggcgaattcc  
>CD\_NM\_006404.3:675  
CgCctGcgagtctGGtatGACTGCAGCAGCTCAATGCCTACTTCAAGAGAGTAGGCATTGAGCTGCTGCAGTTTTTTGct  
cgagctggcgaattcc  
>CD\_NM\_006404.3:246  
CgCctGcgagtctGGtatGATCAGATGGCCTCCAAAGACTTTTTCAAGAGAAAGTCTTTGGAGGCCATCTGAGTTTTTTGct  
cgagctggcgaattcc  
>CD\_NM\_006404.3:788  
CgCctGcgagtctGGtatGACCAAACAAGCCGCTCCTACACTTCAAGAGAGTGTAGGAGCGGCTTGTGGCTTTTTTTGct  
cgagctggcgaattcc  
>CD\_NM\_006404.3:879  
CgCctGcgagtctGGtatGAACAGGTGGACGGCGATGTTAATTCAAGAGATTAACATCGCCGTCCACCTGTGTTTTTTGct  
cgagctggcgaattcc  
>CD\_NM\_006404.3:824  
CgCctGcgagtctGGtatGACGTCTGGTGGGAGTTTTTCAAGAGAATGAAACTGCCACCAGGACGCTTTTTTTGct  
cgagctggcgaattcc  
>CD\_NM\_006404.3:582  
CgCctGcgagtctGGtatGAGCTGTGAATGGGAGCTCCTTTTTTCAAGAGAAAAGGAGCTCCATTACAGCCTTTTTTTGct  
cgagctggcgaattcc  
>CD\_NM\_006404.3:365  
CgCctGcgagtctGGtatGAAGACACCAACACCACGATCATTTCAGAGAATGATCGTGGTGGTGTCTGTTTTTTGct  
cgagctggcgaattcc  
>CD\_NM\_006404.3:694

CgCctGcgagtctGGtatGCACAACCGCACTCGGTATGAACTTCAAGAGAGTTCATACCGAGTGCGGTTGTATTTTTGct  
cgagctggcgaattcc  
>CD\_NM\_006404.3:369  
CgCctGcgagtctGGtatGAACCAACACCACGATCATTCAAGAGACTGAATGATCGTGGTGTGGTGTTTTTGct  
cgagctggcgaattcc  
>CD\_NM\_006404.3:690  
CgCctGcgagtctGGtatGCGCCTACAACCGCACTCGGTATTTCAAGAGAATACCGAGTGCGGTTGTAGGCATTTTTGct  
cgagctggcgaattcc  
>CD\_NM\_006404.3:615  
CgCctGcgagtctGGtatGACCGGAGAGAGCCTTGTGGCAGTTCAAGAGACTGCCACAAGGCTCTCTCCGGCTTTTTGct  
cgagctggcgaattcc  
>CD\_NM\_006404.3:242  
CgCctGcgagtctGGtatGCCGCTCAGATGGCCTCCAAAGTTCAAGAGACTTTGGAGGCCATCTGAGGCGTTTTGct  
cgagctggcgaattcc  
>CD\_NM\_006404.3:600  
CgCctGcgagtctGGtatGATTTGTGAGTTCCGGCCGGAGTTCAAGAGACTCCGGCCGAAACTCACAAAGTTTTGct  
cgagctggcgaattcc  
>CD\_NM\_006404.3:604  
CgCctGcgagtctGGtatGATGAGTTTCCGGCCGGAGAGTTCAAGAGACTCTCTCCGGCCGAAACTCACTTTTTGct  
cgagctggcgaattcc  
>CD\_NM\_006404.3:468  
CgCctGcgagtctGGtatGACTCGTGCGCCTGGTGCACCAGTTCAAGAGACTGGTGCACCAGGCGCACGAGTTTTGct  
cgagctggcgaattcc  
>CD\_NM\_006404.3:827  
CgCctGcgagtctGGtatGCCCTGGTGGCAGTTTCATCATTTCAGAGAATGATGAAACTGCCACCAGGATTTTTGct  
cgagctggcgaattcc  
>CD\_NM\_006404.3:570  
CgCctGcgagtctGGtatGATTCTTCGAAGTGGCTGTGAATTTCAAGAGAATTCACAGCCACTTCGAAGAAGTTTTGct  
cgagctggcgaattcc  
>CD\_NM\_006404.3:561  
CgCctGcgagtctGGtatGCGCCCATGTCTTCTTCGAAGTGTTCAGAGACACTTCGAAGAAGACATGGGCTTTTTGct  
cgagctggcgaattcc  
>CD\_NM\_006404.3:844  
CgCctGcgagtctGGtatGCTCATTGCTGGTGTGGCTGTAGTTCAAGAGACTACAGCCACACCAGCAATGATTTTTGct  
cgagctggcgaattcc  
>CD\_NM\_006404.3:602  
CgCctGcgagtctGGtatGCTGTGAGTTCCGGCCGGAGAGTTCAAGAGACTCTCCGGCCGAAACTCACAAATTTTTGct  
cgagctggcgaattcc  
>CD\_NM\_006404.3:507  
CgCctGcgagtctGGtatGCCCTCTGACCATCCGCTGCTTCTTCAAGAGAGAAGCAGCGGATGGTCAGAGGATTTTTGct  
cgagctggcgaattcc  
>CD\_NM\_006404.3:743  
CgCctGcgagtctGGtatGCGCAGTATGTGCAGAAACATATTTCAAGAGAATATGTTTCTGCACATACTGCATTTTTGct  
cgagctggcgaattcc  
>CD\_NM\_006404.3:739  
CgCctGcgagtctGGtatGCGTGTGCAGTATGTGCAGAACTTCAAGAGAGTTTCTGCACATACTGCACACATTTTTGct  
cgagctggcgaattcc  
>CD\_NM\_006404.3:241  
CgCctGcgagtctGGtatGAACGCCTCAGATGGCCTCCAAATTCAGAGATTTGGAGGCCATCTGAGGCGTTTTGct  
cgagctggcgaattcc  
>CD\_NM\_006404.3:444  
CgCctGcgagtctGGtatGATCCTACCTGCTCCAGTTCCACTTCAAGAGAGTGGAACTGGAGCAGGTAGGACTTTTTGct  
cgagctggcgaattcc  
>CD\_NM\_006404.3:244



CgCctGcgagtctGGtatGACCTCAGATGGCC TCCAAAGACTTCAAGAGAGTCTTTGGAGGCCATCTGAGGCTTTTTGct  
cgagctggcgaattcc  
>CD\_NM\_000459:1788  
CgCctGcgagtctGGtatGAAGGTCTAAATCTCCTGCCTAATTC AAGAGATTAGGCAGGAGATTTAGACCTTTTTTgct  
cgagctggcgaattcc  
>CD\_NM\_000459:2108  
CgCctGcgagtctGGtatGCCGGCTGTGATTTCTTTGGACAATTCAAGAGATTGTCCAAGAAATCACAGCCGATTTTTTgct  
cgagctggcgaattcc  
>CD\_NM\_000459:2136  
CgCctGcgagtctGGtatGCTGGCTATTCTATTTCTTCTATTTCAAGAGAATAGAAGAAATAGAATAGCCATTTTTTgct  
cgagctggcgaattcc  
>CD\_NM\_000459:3108  
CgCctGcgagtctGGtatGAAGGTCAAGAGGTGTACGTGAATTCAAGAGATTCACGTACACCTCTTGACCTTTTTTgct  
cgagctggcgaattcc  
>CD\_NM\_000459:3391  
CgCctGcgagtctGGtatGAAGGCCATCATTTGCCAGATATTCAAGAGATATCTGGGCAAATGATGGCCTTTTTTgct  
cgagctggcgaattcc  
>CD\_NM\_000459:3402  
CgCctGcgagtctGGtatGCTGCCAGATATTGGTGTCTTTTCAAGAGAAAGGACACCAATATCTGGGCAATTTTTTgct  
cgagctggcgaattcc  
>CD\_NM\_000459:1451  
CgCctGcgagtctGGtatGCAGCCCTTCAACATTTCTGTTATTCAAGAGATAACAGAAATGTTGAAGGGCTTTTTTgct  
cgagctggcgaattcc  
>CD\_NM\_000459:3404  
CgCctGcgagtctGGtatGACCCAGATATTGGTGTCTTAATTC AAGAGATTAAGGACACCAATATCTGGGCTTTTTTgct  
cgagctggcgaattcc  
>CD\_NM\_000459.1:1464  
CgCctGcgagtctGGtatGCTCTGTAAAGTTCTTCCAAAGTTCAAGAGACTTTGGAAGAACTTTAACAGAATTTTTTgct  
cgagctggcgaattcc  
>CD\_NM\_000459.1:1788  
CgCctGcgagtctGGtatGCGGTCTAAATCTCCTGCCTAAATTC AAGAGATTTAGGCAGGAGATTTAGACCTTTTTTgct  
cgagctggcgaattcc  
>CD\_NM\_000459.1:926  
CgCctGcgagtctGGtatGCTGGCAGAACTTGTAAGAAAGTTCAAGAGACTTCTTTTACAAGTTCTGCCAATTTTTTgct  
cgagctggcgaattcc  
>CD\_NM\_000459.1:2341  
CgCctGcgagtctGGtatGATCCCAGAATCTCAAGCACAGTTCAAGAGACTGGTGCTTGAGATTCTGGGAGTTTTTgct  
cgagctggcgaattcc  
>CD\_NM\_000459.1:244  
CgCctGcgagtctGGtatGACTCTTGATCTGATGCTGAAATTCAAGAGATTT CAGCATCAGATACAAGAGGTTTTTgct  
cgagctggcgaattcc  
>CD\_NM\_000459.1:1578  
CgCctGcgagtctGGtatGCTCCAAGAAGCTTCTATACAAATTCAAGAGATTTGTATAGAAGCTTCTTGATTTTTTgct  
cgagctggcgaattcc  
>CD\_NM\_000459.1:2716  
CgCctGcgagtctGGtatGCTGAAAGAAATATGCCTCCAAAGTTCAAGAGACTTTGGAGGCATATTCTTTCATTTTTTgct  
cgagctggcgaattcc  
>CD\_NM\_000459.1:1902  
CgCctGcgagtctGGtatGCAGTGATCAGCAGAATATTAAATTC AAGAGATTTAATATTCTGCTGATCACTTTTTTgct  
cgagctggcgaattcc  
>CD\_NM\_000459.1:2196  
CgCctGcgagtctGGtatGACACGTTGATGTGAAGATAAAGTTCAAGAGACTTTATCTTCACATCAACGTGCTTTTTTgct  
cgagctggcgaattcc  
>CD\_NM\_000459.1:3391

CgCtGcgagtctGGtatGCGGCCATCATTTGCCAGATATTTCAAGAGAATATCTGGGCAAATGATGGCCTTTTTTgct  
cgagctggcgaattcc  
>CD\_NM\_000459.1:1986  
CgCtGcgagtctGGtatGACGAGCTAGAGTCAACACCAAGTTCAAGAGACTTGGTGTGACTCTAGCTCGGTTTTTgct  
cgagctggcgaattcc  
>CD\_NM\_000459.1:2743  
CgCtGcgagtctGGtatGAACAGGGACTTTGCAGGAGAACTTCAAGAGAGTTCTCCTGCAAAGTCCCTGTGTTTTTgct  
cgagctggcgaattcc  
>CD\_NM\_000459.1:649  
CgCtGcgagtctGGtatGAATGAAGTACCTGATATTCTAGTTCAAGAGACTAGAATATCAGGTACTTCATGTTTTTgct  
cgagctggcgaattcc  
>CD\_NM\_000459.1:1212  
CgCtGcgagtctGGtatGACCAGATCATATAGAAGTAACTTCAAGAGAGTTTACTTCTATATGATCTGGCTTTTTgct  
cgagctggcgaattcc  
>CD\_NM\_000459.1:1675  
CgCtGcgagtctGGtatGAGGACAGAATATGAACTCTGTGTTCAAGAGACACAGAGTTCATATTCTGTCCGTTTTTgct  
cgagctggcgaattcc  
>CD\_NM\_000459.1:2538  
CgCtGcgagtctGGtatGATCAGGGACTCTGGCCCTAACTTCAAGAGAGTTTAGGGCCAGAGTCCCTGAGTTTTTgct  
cgagctggcgaattcc  
>CD\_NM\_000459.1:3404  
CgCtGcgagtctGGtatGACCAGATATTGGTGTCTTAAATTTCAAGAGATTTAAGGACACCAATATCTGGGTTTTTgct  
cgagctggcgaattcc  
>CD\_NM\_000459.1:1768  
CgCtGcgagtctGGtatGCTCGGACTCCCTCCTCCAAGAGTTCAAGAGACTCTTGGAGGAGGGAGTCCGATTTTTTgct  
cgagctggcgaattcc  
>CD\_NM\_000459.1:218  
CgCtGcgagtctGGtatGCGGACTTGATCTTGATCAATTCTTCAAGAGAGAATTGATCAAGATCAAGTCCATTTTTTgct  
cgagctggcgaattcc  
>CD\_NM\_000459.1:2958  
CgCtGcgagtctGGtatGATCCCAGCAGCTCCTTCACTTCTTCAAGAGAGAAGTGAAGGAGCTGCTGGGAGTTTTTgct  
cgagctggcgaattcc  
>CD\_NM\_000459.1:2444  
CgCtGcgagtctGGtatGCTCTGATCATATTGCAATTGAATTTCAAGAGATTTCAATTGCAATATGATCAGAATTTTTTgct  
cgagctggcgaattcc  
>CD\_NM\_000459.1:2030  
CgCtGcgagtctGGtatGCTCTCACTGCTTGGACCCTTAGTTCAAGAGACTAAGGGTCCAAGCAGTGAGATTTTTTgct  
cgagctggcgaattcc  
>CD\_NM\_000459.1:2151  
CgCtGcgagtctGGtatGCTCTATTACTATCCGTTACAAGTTCAAGAGACTTGTAAACGGATAGTAATAGAATTTTTTgct  
cgagctggcgaattcc  
>CD\_NM\_000459.1:2597  
CgCtGcgagtctGGtatGAAGTGCTTGACTGGAATGACATTTCAAGAGAATGTCATTCCAGTCAAGCACTGTTTTTgct  
cgagctggcgaattcc  
>CD\_NM\_000459.1:2163  
CgCtGcgagtctGGtatGACGTTACAAGGTTCAAGGCAAGTTCAAGAGACTTGCCCTTGAACCTTGTAAACGGTTTTTgct  
cgagctggcgaattcc  
>CD\_NM\_005021:862  
CgCtGcgagtctGGtatGACCCGGATCAGAAGTGGCTATATTCAAGAGATATAGCCACTTCTGATCCGGGCTTTTTTgct  
cgagctggcgaattcc  
>CD\_NM\_005021:327  
CgCtGcgagtctGGtatGATCGAATATGGATGTGCAATAATTTCAAGAGATTTATTGCACATCCATATTCGAGTTTTTgct  
cgagctggcgaattcc  
>CD\_NM\_005021:2158

CgCtGcgagtctGGtatGCAGCCAATATGATGCTTTAATTTTCAAGAGAAATTAAGCATCATATTGGCTATTTTTGct  
cgagctggcgaattcc  
>CD\_NM\_005021:255  
CgCtGcgagtctGGtatGACCGGTGTGATGTGGCATGTAATTTCAAGAGATTACATGCCACATCACACCGGCTTTTTGct  
cgagctggcgaattcc  
>CD\_NM\_005021:1451  
CgCtGcgagtctGGtatGATGGCTGTTAGGAGTAAATCAATTTCAAGAGATTGATTTACTCTAACAGCCAGTTTTGct  
cgagctggcgaattcc  
>CD\_NM\_005021:1753  
CgCtGcgagtctGGtatGACCCACAGAGTCTCTTGACTGTTTTCAAGAGAACAGTCAAGAGACTCTGTGGGCTTTTTGct  
cgagctggcgaattcc  
>CD\_NM\_005021:254  
CgCtGcgagtctGGtatGCGCCGGTGTGATGTGGCATGTATTCAAGAGATACATGCCACATCACACCGGCATTTTTGct  
cgagctggcgaattcc  
>CD\_NM\_005021.2:2155  
CgCtGcgagtctGGtatGAATAGCCAATATGATGCTTTAATTTCAAGAGATTAAAGCATCATATTGGCTATCTTTTTGct  
cgagctggcgaattcc  
>CD\_NM\_005021.2:1725  
CgCtGcgagtctGGtatGCTCTGTTTGTGGCTTTGCTAATTTCAAGAGAAATTAGCAAAGCCACAAACAGAATTTTTGct  
cgagctggcgaattcc  
>CD\_NM\_005021.2:1261  
CgCtGcgagtctGGtatGAGCATCCGAGCTCATAATATACTTTCAAGAGAGTATATTATGAGCTCGGATGCGTTTTGct  
cgagctggcgaattcc  
>CD\_NM\_005021.2:705  
CgCtGcgagtctGGtatGATCACATGGCATCATTTGACAATTTCAAGAGAAATTGTCAATGATGCCATGTGACTTTTTGct  
cgagctggcgaattcc  
>CD\_NM\_005021.2:1305  
CgCtGcgagtctGGtatGCTCTGAGGAAATTTGTTAGAACTTTCAAGAGAGTTTCTAACAATTTCTCAGAATTTTTGct  
cgagctggcgaattcc  
>CD\_NM\_005021.2:1753  
CgCtGcgagtctGGtatGACCACAGAGTCTCTTGACTGTTTTCAAGAGAAACAGTCAAGAGACTCTGTGGGTTTTGct  
cgagctggcgaattcc  
>CD\_NM\_005021.2:1848  
CgCtGcgagtctGGtatGCACAGCAACAGTGAAAGTAAATTTCAAGAGAAATTTACTTTCACTGTTGCTTTTTTTGct  
cgagctggcgaattcc  
>CD\_NM\_005021.2:2557  
CgCtGcgagtctGGtatGACCCGGGTCCGTGATGTAGAATTTCAAGAGAGTTCTACATCACGGACCCGGGCTTTTTGct  
cgagctggcgaattcc  
>CD\_NM\_005021.2:2031  
CgCtGcgagtctGGtatGACCAGACTGTCTGCGGGCTGATTTCAAGAGAAATCAGCCCGCAGACAGTCTGGGTTTTGct  
cgagctggcgaattcc  
>CD\_NM\_005021.2:1137  
CgCtGcgagtctGGtatGATGTGTCAATATCATCCTTCTGTTCAAGAGACAGAAGGATGATATTGACACAGTTTTGct  
cgagctggcgaattcc  
>CD\_NM\_005021.2:1768  
CgCtGcgagtctGGtatGAACTGTTTCTGCCCTCACCTACTTTCAAGAGAGTAGGTGAGGGCAGAAACAGTCTTTTTGct  
cgagctggcgaattcc  
>CD\_NM\_005021.2:2229  
CgCtGcgagtctGGtatGATTCCACAGTGTCTTCTTATATTCAAGAGATATAAGAAGAACACTGTGGAAGTTTTGct  
cgagctggcgaattcc  
>CD\_NM\_005021.2:2445  
CgCtGcgagtctGGtatGATGGCTGGATGTCCTACCCTTTTTTCAAGAGAAAAGGGTAGGACATCCAGCCACTTTTTGct  
cgagctggcgaattcc  
>CD\_NM\_005021.2:143

CgCctGcgagtctGGtatGCGGTGATCATGTCACCTGGATTTTCAAGAGAAATCCAAGTGACATGATCACCATTTTTGct  
cgagctggcgaattcc  
>CD\_NM\_005021.2:2494  
CgCctGcgagtctGGtatGAAGAGCTGTCTGAAGGTAACTTCAAGAGAGTTTACCTTCAGGACAGCTCTCTTTTTGct  
cgagctggcgaattcc  
>CD\_NM\_005021.2:1564  
CgCctGcgagtctGGtatGCAGACTGAAGTTGAACCATTTGTTCAAGAGACAAATGGTTCAACTTCAGTCTTTTTTTGct  
cgagctggcgaattcc  
>CD\_NM\_005021.2:250  
CgCctGcgagtctGGtatGCACTGCCGGTGTGATGTGGCATTTCAGAGAAATGCCACATCACACCGGCAGTTTTTTGct  
cgagctggcgaattcc  
>CD\_NM\_005021.2:1603  
CgCctGcgagtctGGtatGCACCTAATGTGTGATCTTCTACTTCAAGAGAGTAGAAGATCACACATTAGGTTTTTTGct  
cgagctggcgaattcc  
>CD\_NM\_005021.2:576  
CgCctGcgagtctGGtatGCTGGGATACTTTAATGCCAAATTTCAAGAGAAATTTGGCATTAAAGTATCCATTTTTTTGct  
cgagctggcgaattcc  
>CD\_NM\_005021.2:1175  
CgCctGcgagtctGGtatGCCCAGACTTATTGTAACAAGATTTCAAGAGAAATCTTGTACAATAAGCTGGTTTTTTGct  
cgagctggcgaattcc  
>CD\_NM\_005021.2:2178  
CgCctGcgagtctGGtatGCACTAGCAATTTGGTACCTATGTTCAAGAGACATAGGTACCAAATGCTAGTATTTTTGct  
cgagctggcgaattcc  
>CD\_NM\_005021.2:1755  
CgCctGcgagtctGGtatGAACAGAGTCTCTTGACTGTTTCTTCAAGAGAGAAACAGTCAAGAGACTCTGTGTTTTTTGct  
cgagctggcgaattcc  
>CD\_NM\_005021.2:1729  
CgCctGcgagtctGGtatGATTTGTGGCTTTGCTAATCCATTTCAAGAGAAATGGATTAGCAAAGCCACAACTTTTTGct  
cgagctggcgaattcc  
>CD\_NM\_005021.2:436  
CgCctGcgagtctGGtatGCAGAGTGTGTTGCCAAGGAGAAATTTCAAGAGATTTCTCCTTGCCAAACACTTTTTTTGct  
cgagctggcgaattcc  
>CD\_NM\_005021.2:1446  
CgCctGcgagtctGGtatGATGGCTGGCTGTTAGGAGTAAATTTCAAGAGATTTACTCCTAACAGCCAGCCACTTTTTTTGct  
cgagctggcgaattcc  
>CD\_NM\_005021.2:1809  
CgCctGcgagtctGGtatGCCAAGTGAATCAGATGCTAAATTTCAAGAGAAATTTAGCATCTGATTCACTTGTTTTTTTGct  
cgagctggcgaattcc  
>CD\_NM\_002445:1095  
CgCctGcgagtctGGtatGCGGCCAGGAAATTTCTGGACCAATTTCAAGAGATTGGTCCAGAATTTCTGGCCTTTTTTGct  
cgagctggcgaattcc  
>CD\_NM\_138715:1021  
CgCctGcgagtctGGtatGATCCTCCGGTCTTAAAGGTGATTCAAGAGATCACCTTTAAGACCCGAGGACTTTTTTTGct  
cgagctggcgaattcc  
>CD\_NM\_138715:790  
CgCctGcgagtctGGtatGAAGCAGAAATTTATGGCTATGAATTTCAAGAGATTCATAGCCATAATTTCTGCTGTTTTTTGct  
cgagctggcgaattcc  
>CD\_NM\_002445:554  
CgCctGcgagtctGGtatGAAGCATGACAACCTGATCAAAGATTTCAAGAGATCTTTGATCAGTTGTCATGCTGTTTTTTGct  
cgagctggcgaattcc  
>CD\_NM\_002445:822  
CgCctGcgagtctGGtatGATGCATTTGGAACAGGAAATAATTTCAAGAGATTTATTTCTGTTCCAAATGCACTTTTTTGct  
cgagctggcgaattcc  
>CD\_NM\_002445:337

CgCctGcgagtctGGtatGAAGCTCAACTCCTGAAGTGGGATTCAAGAGATCCCACCTCAGGAGTTGAGCTGTTTTTGct  
cgagctggcgaattcc  
>CD\_NM\_002445:167  
CgCctGcgagtctGGtatGCAGCTGCTCCGAATCTGTGAAATTCAGAGATTTACAGATTCGGAGCAGCTATTTTTGct  
cgagctggcgaattcc  
>CD\_NM\_138715:483  
CgCctGcgagtctGGtatGCTGGAGAAGAGAATCCAGCATATTCAGAGATATGCTGGATTCTCTTCTCCATTTTTTGct  
cgagctggcgaattcc  
>CD\_NM\_002445:1094  
CgCctGcgagtctGGtatGCAGGCCAGGAAATTCCTGGACCATTCAAGAGATGGTCCAGAATTTCTGGCCTTTTTTTGct  
cgagctggcgaattcc  
>CD\_NM\_138715:337  
CgCctGcgagtctGGtatGAAGCTCAACTCCTGAAGTGGGATTCAAGAGATCCCACCTCAGGAGTTGAGCTGTTTTTGct  
cgagctggcgaattcc  
>CD\_NM\_138715:167  
CgCctGcgagtctGGtatGCAGCTGCTCCGAATCTGTGAAATTCAGAGATTTACAGATTCGGAGCAGCTATTTTTGct  
cgagctggcgaattcc  
>CD\_NM\_138715:1094  
CgCctGcgagtctGGtatGCAGGCCAGGAAATTCCTGGACCATTCAAGAGATGGTCCAGAATTTCTGGCCTTTTTTTGct  
cgagctggcgaattcc  
>CD\_NM\_138715.1:871  
CgCctGcgagtctGGtatGAACTAATGATCTCAGACTGAAATTCAGAGATTTAGTCTGAGATCATAGTGTTTTTTGct  
cgagctggcgaattcc  
>CD\_NM\_138715.1:172  
CgCctGcgagtctGGtatGATCCGAATCTGTGAAATTTGATTTCAAGAGAATCAAATTTACAGATTCGGAGTTTTTTGct  
cgagctggcgaattcc  
>CD\_NM\_138715.1:1382  
CgCctGcgagtctGGtatGAGGAGAGAATCATCTATTGAAGTTCAAGAGACTTCAATAGATGATTCTCTCCCTTTTTTGct  
cgagctggcgaattcc  
>CD\_NM\_138715.1:170  
CgCctGcgagtctGGtatGCGCTCCGAATCTGTGAAATTTGTTCAAGAGACAAATTTACAGATTCGGAGCATTTTTGct  
cgagctggcgaattcc  
>CD\_NM\_138715.1:856  
CgCctGcgagtctGGtatGCGTACTGAATAACATCACTAATTTCAAGAGAATTAGTGATGTTATTACAGTACTTTTTTGct  
cgagctggcgaattcc  
>CD\_NM\_138715.1:283  
CgCctGcgagtctGGtatGCGCCCTTTACCTCCTCGTGTTTTTTCAAGAGAAAACACGAGGAGGTAAAGGGCATTTTTGct  
cgagctggcgaattcc  
>CD\_NM\_138715.1:645  
CgCctGcgagtctGGtatGCAATCTCCAAGTCCTTAATAAGTTCAAGAGACTTATTAAGGACTTGGAGATTTTTTTGct  
cgagctggcgaattcc  
>CD\_NM\_138715.1:236  
CgCctGcgagtctGGtatGCGCCCTTCCCTTCAAGAGAACTTCAAGAGAGTTTCTCTTGAAGGGAAGGGCTTTTTTTGct  
cgagctggcgaattcc  
>CD\_NM\_138715.1:1021  
CgCctGcgagtctGGtatGCCCTCCGGGTCTTAAAGGTGATTTCAAGAGAATCACCTTTAAGACCCGGAGATTTTTTGct  
cgagctggcgaattcc  
>CD\_NM\_138715.1:904  
CgCctGcgagtctGGtatGCTCTCAGACCTTGAGAAATATCTTCAAGAGAGATATTTCTCAAGGTCTGAGAATTTTTGct  
cgagctggcgaattcc  
>CD\_NM\_138715.1:241  
CgCctGcgagtctGGtatGCTCCCTTCAAGAGAACTGAAGTTCAAGAGACTTCAAGTTTCTTGAAGGGAATTTTTGct  
cgagctggcgaattcc  
>CD\_NM\_138715.1:368

CgCtGcgagtctGGtatGCGCTCAGTTAGTTCAACTAATGTTCAAGAGACATTAGTTGAACTAACTGAGCATTGCT  
cgagctggcgaattcc  
>CD\_NM\_138715.1:881  
CgCtGcgagtctGGtatGATCAGACTGAAAGATTGGGAACCTCAAGAGAGTTCCCAATCTTTCAGTCTGAGTTGCT  
cgagctggcgaattcc  
>CD\_NM\_138715.1:679  
CgCtGcgagtctGGtatGCTTGCTTGATTTGCAGCTCAACTTCAAGAGAGTTGAGCTGCAAATCAAGCAATTTGCT  
cgagctggcgaattcc  
>CD\_NM\_138715.1:235  
CgCtGcgagtctGGtatGAAGCCCTTCCCTTCAAGAGAAATTCAGAGATTTCTCTTGAAGGGAAGGGCTGTTGCT  
cgagctggcgaattcc  
>CD\_NM\_138715.1:1456  
CgCtGcgagtctGGtatGCGGAGTCACTTGCACCTTATAATTCAAGAGATTATAAAGTGCAAGTGACTCCATTTGCT  
cgagctggcgaattcc  
>CD\_NM\_138715.1:131  
CgCtGcgagtctGGtatGCGGGATCACTTTCACAATCAACTTCAAGAGAGTTGATTGTGAAAGTGATCCATTTGCT  
cgagctggcgaattcc  
>CD\_NM\_138715.1:906  
CgCtGcgagtctGGtatGATCAGACCTTGAGAAATATCACTTCAAGAGAGTGATATTTCTCAAGGTCTGAGTTGCT  
cgagctggcgaattcc  
>CD\_NM\_138715.1:310  
CgCtGcgagtctGGtatGCCTCATCCCTCTCATTGGAATATTCAAGAGATATTCCAATGAGAGGGATGAGATTTGCT  
cgagctggcgaattcc  
>CD\_NM\_138715.1:211  
CgCtGcgagtctGGtatGCTTGCTTCTCCGAATCTTAAATTCAGAGATTTAGGATTCGGAGGAAGCAAATTTGCT  
cgagctggcgaattcc  
>CD\_NM\_138715.1:790  
CgCtGcgagtctGGtatGCGCAGAAATATGGCTATGAAATTCAGAGATTTTCATAGCCATAATTTCTGCTTTGCT  
cgagctggcgaattcc  
>CD\_NM\_002349:1842  
CgCtGcgagtctGGtatGCGCGTGGCTATGTCTACTGGAATTCAGAGATTCAGTAGACATAGCCACGCATTTGCT  
cgagctggcgaattcc  
>CD\_NM\_002349:2003  
CgCtGcgagtctGGtatGACCCGCAAGTCTTCTTGTATTTCAGAGAAATAACAAGAAAGACTTGCAGGGTTGCT  
cgagctggcgaattcc  
>CD\_NM\_002349:3350  
CgCtGcgagtctGGtatGAACGTTGCAGAATGCTTCAGAATTCAGAGATTTCTGAAGCATTTCTGCAACGCTTTGCT  
cgagctggcgaattcc  
>CD\_NM\_002349:3697  
CgCtGcgagtctGGtatGCACCAGGTGCTATTTGCTACTATTCAAGAGATAGTAGCAAATAGCACCTGGTTTTGCT  
cgagctggcgaattcc  
>CD\_NM\_002349:4361  
CgCtGcgagtctGGtatGCGGCCAGCTCTTCTGGAAGATTTCAAGAGAATCTCCAGAAAGAGCTGGCCATTTGCT  
cgagctggcgaattcc  
>CD\_NM\_002349:5148  
CgCtGcgagtctGGtatGACGGGTTTCTCATCAGTTCGATTTCAAGAGAATCGAACTGATGAGAAACCCGCTTTGCT  
cgagctggcgaattcc  
>CD\_NM\_002349:4173  
CgCtGcgagtctGGtatGAAGCACAGCATTTCTTGCTTGATTCAAGAGATACAAGCAAGAATGCTGTGCTTTGCT  
cgagctggcgaattcc  
>CD\_NM\_002349:1404  
CgCtGcgagtctGGtatGAAGCCAAATGTTCCCTACAATATTCAAGAGATATTGTAGGGAACATTTGGCTTTGCT  
cgagctggcgaattcc  
>CD\_NM\_002349:2004

CgCctGcgagtctGGtatGACCGCAAGTCTTTCTTGTTATATTCAAGAGATATAACAAGAAAGACTTGCGGGTTTTTGct  
cgagctggcgaattcc  
>CD\_NM\_002349.1:2876  
CgCctGcgagtctGGtatGCGCCAGATTCTGCAGCTAAAGTTCAAGAGACTTTAGCTGCAGAATCTGGGCTTTTTTGct  
cgagctggcgaattcc  
>CD\_NM\_002349.1:554  
CgCctGcgagtctGGtatGACTTGTAATTTCCATTCTTAATTTCAAGAGATTAAGAATGGAAATTCACAAGGTTTTTGct  
cgagctggcgaattcc  
>CD\_NM\_002349.1:1472  
CgCctGcgagtctGGtatGATCCAATCATGTGAGGAGAACTTTCAAGAGAGTTTCTCCTCACATGATTGGACTTTTTTGct  
cgagctggcgaattcc  
>CD\_NM\_002349.1:3860  
CgCctGcgagtctGGtatGAAGGATGAAGTTCATACTAAATTTCAAGAGAATTTAGTATGAACTTCATCCTGTTTTTGct  
cgagctggcgaattcc  
>CD\_NM\_002349.1:3308  
CgCctGcgagtctGGtatGATGTCTCTCTGTCAGAAATATTTTCAAGAGAAATATTTCTGACAGAGAGACACTTTTTTGct  
cgagctggcgaattcc  
>CD\_NM\_002349.1:4962  
CgCctGcgagtctGGtatGCGTTGATAGCTTCAAATGAACTTTCAAGAGAGTTTCATTTGAAGCTATCAACATTTTTTGct  
cgagctggcgaattcc  
>CD\_NM\_002349.1:3362  
CgCctGcgagtctGGtatGACTTCAGAACTGTAAAGTATCTTCAAGAGAGATACTTTACAGTTTCTGAAGCTTTTTTGct  
cgagctggcgaattcc  
>CD\_NM\_002349.1:3632  
CgCctGcgagtctGGtatGATCGAAGACTGTGTAGTATTAGTTCAAGAGACTAATACTACACAGTCTTCGAGTTTTTGct  
cgagctggcgaattcc  
>CD\_NM\_002349.1:1182  
CgCctGcgagtctGGtatGCTGAAAGTAATTCCTGGGATAATTTCAAGAGATTATCCCAGGAATTACTTTCATTTTTTGct  
cgagctggcgaattcc  
>CD\_NM\_002349.1:4014  
CgCctGcgagtctGGtatGCTTCTCTTATGTGGTTTGATAATTTCAAGAGATTATCAAACCACATAAGAGAATTTTTTGct  
cgagctggcgaattcc  
>CD\_NM\_002349.1:2348  
CgCctGcgagtctGGtatGCGGCATTTCTATGATGATAGAGTTCAAGAGACTCTATCATCATAGAAATGCCATTTTTTGct  
cgagctggcgaattcc  
>CD\_NM\_002349.1:1842  
CgCctGcgagtctGGtatGACGTGGCTATGTCTACTGGAAATTTCAAGAGATTTCCAGTAGACATAGCCACGCTTTTTTGct  
cgagctggcgaattcc  
>CD\_NM\_002349.1:1138  
CgCctGcgagtctGGtatGCGCAGGCTGGCTGCCAAATAATTTCAAGAGAATTTATTTGGCAGCCAGCCTGCATTTTTTGct  
cgagctggcgaattcc  
>CD\_NM\_002349.1:2004  
CgCctGcgagtctGGtatGACGCAAGTCTTTCTTGTTATAATTTCAAGAGATTATAACAAGAAAGACTTGCGGTTTTTGct  
cgagctggcgaattcc  
>CD\_NM\_002349.1:4135  
CgCctGcgagtctGGtatGCACCTTTAAAGTTATTGAAGAATTTCAAGAGATTTCAATAACTTTAAAGGTTTTTTTGct  
cgagctggcgaattcc  
>CD\_NM\_002349.1:4838  
CgCctGcgagtctGGtatGCTGAGAGTTTGGCTTGATTATTTCAAGAGAATAATCCAAGCCAACTCTCATTTTTTGct  
cgagctggcgaattcc  
>CD\_NM\_002349.1:2181  
CgCctGcgagtctGGtatGAGCTGTGGATTGGTTTGAATAATTTCAAGAGATTATTCAAACCAATCCACAGCCTTTTTTGct  
cgagctggcgaattcc  
>CD\_NM\_002349.1:2254

CgCtGcgagtctGGtatGATCTACTATTATCATGCCAAATTTCAAGAGAATTTGGCATGATAATAGTAGACTTTTTTGct  
cgagctggcgaattcc  
>CD\_NM\_002349.1:4115  
CgCtGcgagtctGGtatGAACGGCTTCTGGGATATTCAAATTTCAAGAGATTTGAATATCCCAGAAGCCGTCTTTTTTGct  
cgagctggcgaattcc  
>CD\_NM\_002349.1:360  
CgCtGcgagtctGGtatGATGCCATGCTGTGGTGGAAATGTTCAAGAGACATTTCCACCACAGCATGGCACTTTTTTGct  
cgagctggcgaattcc  
>CD\_NM\_002349.1:805  
CgCtGcgagtctGGtatGCGCTGATTTACTGAGCATCAACTTTCAAGAGAGTTGATGCTCAGTAAATCAGCTTTTTTGct  
cgagctggcgaattcc  
>CD\_NM\_002349.1:4237  
CgCtGcgagtctGGtatGACCACAGTTTATGCCATATGAATTTCAAGAGATTCATATGGCATAAACTGTGGCTTTTTTGct  
cgagctggcgaattcc  
>CD\_NM\_002349.1:2488  
CgCtGcgagtctGGtatGCGGACCTCCACTTATAATTGAATTTCAAGAGATTCATTTATAAGTGGAGGTCCATTTTTTGct  
cgagctggcgaattcc  
>CD\_NM\_002349.1:4471  
CgCtGcgagtctGGtatGCTTTGACTATATCCCATGGAAATTTCAAGAGATTTCCATGGGATATAGTCAAATTTTTTGct  
cgagctggcgaattcc  
>CD\_NM\_002438:427  
CgCtGcgagtctGGtatGAGGGATCAAAGGAGAAGATTTATTCAAGAGATAAATCTTCTCCTTTGATCCCCTTTTTTGct  
cgagctggcgaattcc  
>CD\_NM\_002438:744  
CgCtGcgagtctGGtatGCGGGCAGTGAAAGCTTATGGAATTTCAAGAGATTCATAAGCTTTCACTGCCCTTTTTTGct  
cgagctggcgaattcc  
>CD\_NM\_002438:2189  
CgCtGcgagtctGGtatGAAGCAAACAATATGGCGATTAATTTCAAGAGATTAATCGCCATATTGTTTGCTGTTTTTGct  
cgagctggcgaattcc  
>CD\_NM\_002438:2319  
CgCtGcgagtctGGtatGAGGCTTATGGAGAACCTAATAATTTCAAGAGATTATTAGGTTCTCCATAAGCCCTTTTTTGct  
cgagctggcgaattcc  
>CD\_NM\_002438:4014  
CgCtGcgagtctGGtatGCAGGGACGTGGCTGTGGATAAATTTCAAGAGATTTATCCACAGCCACGTCCCTTTTTTGct  
cgagctggcgaattcc  
>CD\_NM\_002438:4086  
CgCtGcgagtctGGtatGCACGGAATGATTGTGTAGCTTTTTCAAGAGAAAAGCTACACAATCATTCCGTTTTTTTTGct  
cgagctggcgaattcc  
>CD\_NM\_002438.1:3669  
CgCtGcgagtctGGtatGCTGTGTTTATCTGGATCTTGATTTCAAGAGAATCAAGATCCAGATAAACACATTTTTTGct  
cgagctggcgaattcc  
>CD\_NM\_002438.1:3249  
CgCtGcgagtctGGtatGCGCTGACTGTGTTGTTATTATTTTTCAAGAGAAATAATAACAACACAGTCAGCATTTTTTGct  
cgagctggcgaattcc  
>CD\_NM\_002438.1:3916  
CgCtGcgagtctGGtatGCCATTGAAAGTGCTGCAGAATTTCAAGAGAATTTCTGCAGCACTTTCAATGGATTTTTGct  
cgagctggcgaattcc  
>CD\_NM\_002438.1:718  
CgCtGcgagtctGGtatGCTTGGATATTGTCCATTGAAATTTCAAGAGAATTTCAATGGACAATATCCAAATTTTTGct  
cgagctggcgaattcc  
>CD\_NM\_002438.1:705  
CgCtGcgagtctGGtatGAACAGACAAGCTATTTGGATATTTCAAGAGAATATCCAAATAGCTTGTCTGTGTTTTTGct  
cgagctggcgaattcc  
>CD\_NM\_002438.1:2189



CgCctGcgagtctGGtatGCGCAAACAATATGGCGATTAATTTCAAGAGAATTAATCGCCATATTGTTTGCTTTTTTgct  
cgagctggcgaattcc  
>CD\_NM\_002438.1:3839  
CgCctGcgagtctGGtatGCCTATATTGAGTCCTCATATACTTCAAGAGAGTATATGAGGACTCAATATAGTTTTTTGct  
cgagctggcgaattcc  
>CD\_NM\_002438.1:3824  
CgCctGcgagtctGGtatGCCATGGTCACTGTTACTATATTTCAAGAGAATATAGTAACAGTGACCATGGATTTTTGct  
cgagctggcgaattcc  
>CD\_NM\_002438.1:4087  
CgCctGcgagtctGGtatGAGGAATGATTGTGTAGCTTTACTTCAAGAGAGTAAAGCTACACAATCATTCCGTTTTTgct  
cgagctggcgaattcc  
>CD\_NM\_002438.1:2611  
CgCctGcgagtctGGtatGCCTATTCAAAGTGAAAGTGAAATTCAGAGATTTCACTTTCACTTTGAATAGATTTTTGct  
cgagctggcgaattcc  
>CD\_NM\_002438.1:1695  
CgCctGcgagtctGGtatGATGTAATAATGAGAATGCTTATTTCAAGAGAATAAGCATTCTCATTATTACAGTTTTTgct  
cgagctggcgaattcc  
>CD\_NM\_002438.1:2386  
CgCctGcgagtctGGtatGCTGTCTTGAATGATATTAATTTTCAAGAGAAATTAATATCATTCCAAGACATTTTTTgct  
cgagctggcgaattcc  
>CD\_NM\_002438.1:1087  
CgCctGcgagtctGGtatGCATCTGGAATGTGTTCAAGAACTTCAAGAGAGTTTCTGAACACATTCCAGATTTTTTgct  
cgagctggcgaattcc  
>CD\_NM\_002438.1:2796  
CgCctGcgagtctGGtatGATGTGTGACCATGTATTCAAATTTCAAGAGAATTTGAATACATGGTCACACAGTTTTTgct  
cgagctggcgaattcc  
>CD\_NM\_002438.1:3577  
CgCctGcgagtctGGtatGCGTAACTTGACTGATAATCAATTTCAAGAGAATTGATTATCAGTCAAGTTACTTTTTTgct  
cgagctggcgaattcc  
>CD\_NM\_002438.1:3229  
CgCctGcgagtctGGtatGCGCAGTCTTCTTATGAAGATGTTCAAGAGACATCTTCATAAGAAAGACTGCTTTTTTgct  
cgagctggcgaattcc  
>CD\_NM\_002438.1:3387  
CgCctGcgagtctGGtatGCACAGATGGCTTTGTAAATATTTCAAGAGAATATTTAACAAGCCATCTGTTTTTTgct  
cgagctggcgaattcc  
>CD\_NM\_002438.1:2358  
CgCctGcgagtctGGtatGATGTGGTGAGCTGAAAGGTGACTTCAAGAGAGTCACCTTTCAGCTCACCACAGTTTTTgct  
cgagctggcgaattcc  
>CD\_NM\_002438.1:3417  
CgCctGcgagtctGGtatGAAGCTATTCATCATGAGACAATTCAGAGATTGTCTCATGAGTGAATAGCTGTTTTTgct  
cgagctggcgaattcc  
>CD\_NM\_002438.1:3642  
CgCctGcgagtctGGtatGCGCTGATGAGCCCAAATTGAAATTCAGAGATTTCAATTTGGGCTCATCAGCATTTTTGct  
cgagctggcgaattcc  
>CD\_NM\_002438.1:1208  
CgCctGcgagtctGGtatGCTGCCGGTCACTGTTACAAGATTTCAAGAGAATCTTGTAACAGTGACCGGCATTTTTGct  
cgagctggcgaattcc  
>CD\_NM\_002438.1:144  
CgCctGcgagtctGGtatGAGGTGCTGTTCTCTACTGGACTTCAAGAGAGTCCAGTAGGAGAACAGCACCTTTTTGct  
cgagctggcgaattcc  
>CD\_NM\_002438.1:693  
CgCctGcgagtctGGtatGCACTGACTATGACACAGACAAGTTCAAGAGACTTGTCTGTGTCATAGTCAGTATTTTTGct  
cgagctggcgaattcc  
>CD\_NM\_002438.1:3042

CgCctGcgagtctGGtatGCGGAGGGAATCTGGTCTCCATATTCAAGAGATATGGAGACCAGATTCCCTCCATTTTTGct  
cgagctggcgaattcc  
>CD\_NM\_002438.1:1159  
CgCctGcgagtctGGtatGACCTCAGAAAGTGATGTGCCTATTCAAGAGATAGGCACATCACTTTCTGAGGGTTTTGct  
cgagctggcgaattcc  
>CD\_NM\_002438.1:3247  
CgCctGcgagtctGGtatGAATGCTGACTGTGTTGTTATTATTCAAGAGATAATAACAACACAGTCAGCATCTTTTTGct  
cgagctggcgaattcc  
>CD\_NM\_002438.1:1792  
CgCctGcgagtctGGtatGCGGACAGGACTTTCAGATATACTTCAAGAGAGTATATCTGAAAGTCCTGTCCATTTTTGct  
cgagctggcgaattcc  
>CD\_NM\_015717.1:164  
CgCctGcgagtctGGtatGACCACAGTCCGTGCTGCATTAATTCAAGAGATTAATGCAGCACGGACTGTGGGTTTTGct  
cgagctggcgaattcc  
>CD\_NM\_015717.1:249  
CgCctGcgagtctGGtatGCGGGCACCATATCAGATGTAAATTCAAGAGATTTACATCTGATATGGTGCCATTTTTGct  
cgagctggcgaattcc  
>CD\_NM\_015717.1:1006  
CgCctGcgagtctGGtatGACGACCCTATGTCCCATCAGAATTCAAGAGATTCTGATGGGACATAGGGTCGTTTTGct  
cgagctggcgaattcc  
>CD\_NM\_015717.1:530  
CgCctGcgagtctGGtatGAAGAAAGCCAGTGCTTTAAATATTCAAGAGATATTTAAAGCACTGGCTTCTTTTTGct  
cgagctggcgaattcc  
>CD\_NM\_015717.1:534  
CgCctGcgagtctGGtatGCAGCCAGTGCTTTAAATACAAATTCAAGAGATTTGTATTTAAAGCACTGGCTTTTTTgct  
cgagctggcgaattcc  
>CD\_NM\_015717.1:240  
CgCctGcgagtctGGtatGACCGGTTTATGGGCACCATATCTTCAAGAGAGATATGGTGCCATAAAACCGGGTTTTGct  
cgagctggcgaattcc  
>CD\_NM\_015717.1:920  
CgCctGcgagtctGGtatGCATGAACACTGTGGCAATATAATTCAAGAGATTATATTGCCACAGTGTCATTTTTTgct  
cgagctggcgaattcc  
>CD\_NM\_015717.1:922  
CgCctGcgagtctGGtatGCGAACACTGTGGCAATATAAAGTTCAAGAGACTTTATATTGCCACAGTGTCATTTTTTgct  
cgagctggcgaattcc  
>CD\_NM\_015717.1:313  
CgCctGcgagtctGGtatGAACCCTGGATTCTGAAATTAATTCAAGAGATTTAATTTCAGAATCCAGGGTGTTTTTGct  
cgagctggcgaattcc  
>CD\_NM\_015717.1:754  
CgCctGcgagtctGGtatGAAGTGAGCAGGAGTTTCTGTATTTCAAGAGAATACAGAACTCCTGCTCACTTTTTTgct  
cgagctggcgaattcc  
>CD\_NM\_015717.1:589  
CgCctGcgagtctGGtatGAAGCAAGTTGCTCAAACGACAATTCAAGAGATTGTCGTTTGGCAACTGCTTTTTTgct  
cgagctggcgaattcc  
>CD\_NM\_015717.1:391  
CgCctGcgagtctGGtatGACTGGGTTATGTGCGTTCTCAGTTCAAGAGACTGAGAACGCACATAAACCAGGTTTTTgct  
cgagctggcgaattcc  
>CD\_NM\_015717.1:450  
CgCctGcgagtctGGtatGAACAGATCCAGATCTTAACAAGTTCAAGAGACTTGTTAAGATCTGGATCTGTTTTTTgct  
cgagctggcgaattcc  
>CD\_NM\_015717.1:498  
CgCctGcgagtctGGtatGCTGCCCAAATCCCAGAGTTAAATTCAAGAGATTTAACTCTGGGATTTGGGCATTTTTTgct  
cgagctggcgaattcc  
>CD\_NM\_015717.1:567

CgCctGcgagtctGGtatGCCAGGGCAGCTTGGAGAATATTTCAAGAGAATATTCTCCAAGCTGCCCTGGATTTTTGct  
cgagctggcgaattcc  
>CD\_NM\_015717.1:311  
CgCctGcgagtctGGtatGCGCACCCCTGGATTCTGAAATTATTCAAGAGATAATTTTCAAGATCCAGGGTGCTTTTTTgct  
cgagctggcgaattcc  
>CD\_NM\_015717.1:748  
CgCctGcgagtctGGtatGATCAGAGAGTGAGCAGGAGTTTTTCAAGAGAAAACCTCCTGCTCACTCTCTGAGTTTTTgct  
cgagctggcgaattcc  
>CD\_NM\_015717.1:577  
CgCctGcgagtctGGtatGATTGGAGAATATGAGCAAGTTGTTCAAGAGACAACTTGCTCATATTCTCCAAGTTTTTgct  
cgagctggcgaattcc  
>CD\_NM\_015717.1:364  
CgCctGcgagtctGGtatGAGTTCAGATCCAGATGGTGAATTTCAAGAGAATTCACCATCTGGATCTGAACGTTTTTgct  
cgagctggcgaattcc  
>CD\_NM\_015717.1:74  
CgCctGcgagtctGGtatGACGCACTTCACTGTGGACAACTTCAAGAGAGTTTGTCCACAGTGAAGTGCCTTTTTGct  
cgagctggcgaattcc  
>CD\_NM\_015717.1:404  
CgCctGcgagtctGGtatGAGTTCAGTTCCTGAAGTTAATTTCAAGAGATTAACCTCAGGAACTGAGAACGTTTTTgct  
cgagctggcgaattcc  
>CD\_NM\_015717.1:446  
CgCctGcgagtctGGtatGCACGCACAGATCCAGATCTTAATTTCAAGAGATTAAGATCTGGATCTGTGCGTTTTTTGct  
cgagctggcgaattcc  
>CD\_NM\_015717.1:616  
CgCctGcgagtctGGtatGCATTCTACAGGTGGTTTTCTCAATTTCAAGAGATTGAGAAACCACCTGTAGAATATTTTTGct  
cgagctggcgaattcc  
>CD\_NM\_015717.1:1004  
CgCctGcgagtctGGtatGCAGCGACCCTATGTCCCATCAGTTCAAGAGACTGATGGGACATAGGGTCGCTTTTTTTGct  
cgagctggcgaattcc  
>CD\_NM\_015717.1:187  
CgCctGcgagtctGGtatGATGCCTGACGCTGGTCTTCAAGAGAGACCAGGACCAGCGTCAGGCAGTTTTTgct  
cgagctggcgaattcc  
>CD\_NM\_015717.1:205  
CgCctGcgagtctGGtatGAGTCGCCTCCGTCCTGCTGCAGTTCAAGAGACTGCAGCAGGACGGAGGCGACTTTTTgct  
cgagctggcgaattcc  
>CD\_NM\_015717.1:217  
CgCctGcgagtctGGtatGACTGCTGCAGGCCGTCCTTTATTTCAAGAGAATAAAGGACGGCCTGCAGCAGTTTTTgct  
cgagctggcgaattcc  
>CD\_NM\_015717.1:949  
CgCctGcgagtctGGtatGATCACTTCAGGCCCTGGAATGATTTCAAGAGAATCATTCAGGCCTGAAGTGAGTTTTTgct  
cgagctggcgaattcc  
>CD\_NM\_015717.1:535  
CgCctGcgagtctGGtatGCGCCAGTGCTTTAAATACAAAGTTCAAGAGACTTTGTATTTAAAGCACTGGCTTTTTTgct  
cgagctggcgaattcc  
>CD\_NM\_015717.1:400  
CgCctGcgagtctGGtatGCGTGCGTTCTCAGTTCCTGAAGTTCAAGAGACTTCAGGAACTGAGAACGCACATTTTTGct  
cgagctggcgaattcc  
>CD\_NM\_015717.1:355  
CgCctGcgagtctGGtatGAGCAGCTGGCGTTCAGATCCAGTTCAAGAGACTGGATCTGAACGCCAGCTGCCTTTTTGct  
cgagctggcgaattcc  
>CD\_NM\_015717.1:361  
CgCctGcgagtctGGtatGCGGCGTTCAGATCCAGATGGTGTTCAGAGACACCATCTGGATCTGAACGCCATTTTTGct  
cgagctggcgaattcc  
>CD\_NM\_015717.1:839

CgCctGcgagtctGGtatGCCCTGGGTGGATGACACGCCATTTCAAGAGAATGGCGTGTTCATCCACCCAGGATTTTTGct  
cgagctggcgaattcc  
>CD\_NM\_014398:1111  
CgCctGcgagtctGGtatGCCCGTCTCAGATCCAGAGACAATTTCAAGAGATTGTCTCTGGATCTGAGACGGTTTTTTGct  
cgagctggcgaattcc  
>CD\_NM\_014398:874  
CgCctGcgagtctGGtatGCACGGAAGCAGACTCTGTATAATTTCAAGAGATTATACAGAGTCTGCTTCCGTTTTTTGct  
cgagctggcgaattcc  
>CD\_NM\_014398:1066  
CgCctGcgagtctGGtatGCAGGATGAAGAATCATATTATATTCAAGAGATATAATATGATTCTTCATCCTTTTTTTGct  
cgagctggcgaattcc  
>CD\_NM\_014398:1390  
CgCctGcgagtctGGtatGCTCCGCTAAGGTGTCAATCATTTCAGAGAAATGATTGACACCTTAGGCGGATTTTTTTGct  
cgagctggcgaattcc  
>CD\_NM\_014398.2:854  
CgCctGcgagtctGGtatGCGGAATTTATCAGGTTCTAAACTTCAAGAGAGTTTAGAACCTGATAAATTCATTTTTGct  
cgagctggcgaattcc  
>CD\_NM\_014398.2:1220  
CgCctGcgagtctGGtatGATCAGCCCACCTGCAGGTGAAATTTCAAGAGATTTACCTGCAGGTGGGCTGACTTTTTGct  
cgagctggcgaattcc  
>CD\_NM\_014398.2:1241  
CgCctGcgagtctGGtatGCACAACCGATGTCCAACCTCAATTTCAAGAGATTGAAGTTGGACATCGGTTTTTTTTGct  
cgagctggcgaattcc  
>CD\_NM\_014398.2:546  
CgCctGcgagtctGGtatGATTACAGTCGGCCCTAGCTTAGTTCAAGAGACTAAGCTAGGGCCGACTGTAACTTTTTTGct  
cgagctggcgaattcc  
>CD\_NM\_014398.2:1355  
CgCctGcgagtctGGtatGCGGTCTCTGCCTTATGGGTATGTTCAAGAGACATACCATAAGGCAGAGACCATTTTTGct  
cgagctggcgaattcc  
>CD\_NM\_014398.2:1302  
CgCctGcgagtctGGtatGAAGTGCTCGTCTGACTACACAATTTCAAGAGATTGTGTAGTCAGACGAGCACTTTTTTTGct  
cgagctggcgaattcc  
>CD\_NM\_014398.2:1115  
CgCctGcgagtctGGtatGATCAGATCCAGAGACAATTTACTTCAAGAGAGTAAATTTGTCTCTGGATCTGAGTTTTTTGct  
cgagctggcgaattcc  
>CD\_NM\_014398.2:681  
CgCctGcgagtctGGtatGATTCCAGCAACTTTATCGATAGTTCAAGAGACTATCGATAAAGTTGCTGGAAGTTTTTTGct  
cgagctggcgaattcc  
>CD\_NM\_014398.2:1123  
CgCctGcgagtctGGtatGAAGAGACAATTTACCAAGGAATTTCAAGAGAAATTCCTTGGTAAATTTGTCTCTGTTTTTTGct  
cgagctggcgaattcc  
>CD\_NM\_014398.2:531  
CgCctGcgagtctGGtatGACTCCAGTTACTGAAGTTACAGTTCAAGAGACTGTAACCTCAGTAACTGGAGGTTTTTTGct  
cgagctggcgaattcc  
>CD\_NM\_014398.2:1076  
CgCctGcgagtctGGtatGCTCATATTATATCAGTGAAGTGTTCAGAGACACTTCACTGATATAATATGATTTTTTTGct  
cgagctggcgaattcc  
>CD\_NM\_014398.2:403  
CgCctGcgagtctGGtatGCTCAAACAGCGGCCACAGTAAATTTCAAGAGATTTACTGTGGCCGCTGTTTGAATTTTTTTGct  
cgagctggcgaattcc  
>CD\_NM\_014398.2:237  
CgCctGcgagtctGGtatGAACGATGGCAGTCAAATGAGAGTTCAAGAGACTCTCATTTGACTGCCATCGTTTTTTTGct  
cgagctggcgaattcc  
>CD\_NM\_014398.2:832

CgCctGcgagtctGGtatGATCAGCCATCGTCAGTCAAGACTTCAAGAGAGTCTTGACTGACGATGGCTGAGTTTTTGct  
cgagctggcgaattcc  
>CD\_NM\_014398.2:675  
CgCctGcgagtctGGtatGCCACCCCTCCAGCAACTTTATTTCAAGAGAATAAAGTTGCTGGAAGGGTGGTTTTTTGct  
cgagctggcgaattcc  
>CD\_NM\_014398.2:1390  
CgCctGcgagtctGGtatGCCCGCCTAAGGTGTCAATCATCTTCAAGAGAGATGATTGACACCTTAGGCGGATTTTTTGct  
cgagctggcgaattcc  
>CD\_NM\_014398.2:849  
CgCctGcgagtctGGtatGCAGACTGGAATTTATCAGGTTCTTCAAGAGAGAACCCTGATAAATTCCAGTCTTTTTTTGct  
cgagctggcgaattcc  
>CD\_NM\_014398.2:333  
CgCctGcgagtctGGtatGATCCAGCAACCAGCTAAGCAAGTTCAAGAGACTTGCTTAGCTGGTTGCTGGACTTTTTTGct  
cgagctggcgaattcc  
>CD\_NM\_014398.2:720  
CgCctGcgagtctGGtatGCCCGGTCAGAAGCCTGTTCAACTTCAAGAGAGTTGAACAGGCTTCTGACCGTTTTTTGct  
cgagctggcgaattcc  
>CD\_NM\_014398.2:276  
CgCctGcgagtctGGtatGCCCAGAGATTATTCTCAACCTATTCAAGAGATAGGTTGAGAATAATCTCTGGTTTTTTGct  
cgagctggcgaattcc  
>CD\_NM\_014398.2:842  
CgCctGcgagtctGGtatGATCAGTCAAGACTGGAATTTATTTCAAGAGAATAAATTCCAGTCTTGACTGACTTTTTTGct  
cgagctggcgaattcc  
>CD\_NM\_014398.2:1300  
CgCctGcgagtctGGtatGCTGAGTGCTCGTCTGACTACACTTCAAGAGAGTGTAGTCAGACGAGCACTCATTTTTTGct  
cgagctggcgaattcc  
>CD\_NM\_014398.2:294  
CgCctGcgagtctGGtatGACTACTGCAGCAGCAACAGTACTTCAAGAGAGTACTGTTGCTGCTGCAGTAGGTTTTTGct  
cgagctggcgaattcc  
>CD\_NM\_014398.2:1045  
CgCctGcgagtctGGtatGCTGTGAATCTCACATTTACCAATTCAAGAGATTGGTAAATGTGAGATTCACAATTTTTGct  
cgagctggcgaattcc  
>CD\_NM\_014398.2:516  
CgCctGcgagtctGGtatGCACTCACACACAGCTCCTCCAGTTCAAGAGACTGGAGGAGCTGTGTGTGAGTTTTTTGct  
cgagctggcgaattcc  
>CD\_NM\_014398.2:911  
CgCctGcgagtctGGtatGCCAGCTGATTGTTCAAGACAAGTTCAAGAGACTTGTCTTGAACAATCAGCTGTTTTTTGct  
cgagctggcgaattcc  
>CD\_NM\_014398.2:522  
CgCctGcgagtctGGtatGAACACAGCTCCTCCAGTTACTGTTCAAGAGACAGTAACTGGAGGAGCTGTGTGTTTTTTGct  
cgagctggcgaattcc  
>CD\_NM\_014398.2:637  
CgCctGcgagtctGGtatGACCACACAACCTGGGAACACCACTTCAAGAGAGTGGTGTCCAGTTGTGTGGCTTTTTTGct  
cgagctggcgaattcc  
>CD\_NM\_014398.2:1111  
CgCctGcgagtctGGtatGACGTCTCAGATCCAGAGACAATTTCAAGAGAATTGTCTCTGGATCTGAGACGGTTTTTTGct  
cgagctggcgaattcc  
>CD\_NM\_021155:771  
CgCctGcgagtctGGtatGACCCTGTCCCTGGGAATGGACATTTCAAGAGATGTCCATTCCAGGGACAGGGTTTTTTGct  
cgagctggcgaattcc  
>CD\_NM\_021155.2:872  
CgCctGcgagtctGGtatGAGCCCAGCTCGTCGTAATCAAATTTCAAGAGATTTGATTACGACGAGCTGGGCCTTTTTTGct  
cgagctggcgaattcc  
>CD\_NM\_021155.2:796

CgCtGcgagtctGGtatGCCAAGGAACTGTTACTTCATTTCAAGAGAATGAAGTAACAGTTTCTTGGATTTTTGct  
cgagctggcgaattcc  
>CD\_NM\_021155.2:684  
CgCtGcgagtctGGtatGATGGGTGAGCTTCCAGAGAAATTTCAAGAGAATTTCTCTGGAAGCTCACCCACTTTTTGct  
cgagctggcgaattcc  
>CD\_NM\_021155.2:477  
CgCtGcgagtctGGtatGATGGGTGAGCTTCCAGAGAAATTTCAAGAGAATTTCTCTGGAAGCTCACCCACTTTTTGct  
cgagctggcgaattcc  
>CD\_NM\_021155.2:546  
CgCtGcgagtctGGtatGATGGGTGAGCTTCCAGAGAAATTTCAAGAGAATTTCTCTGGAAGCTCACCCACTTTTTGct  
cgagctggcgaattcc  
>CD\_NM\_021155.2:339  
CgCtGcgagtctGGtatGATGGGTGAGCTTCCAGAGAAATTTCAAGAGAATTTCTCTGGAAGCTCACCCACTTTTTGct  
cgagctggcgaattcc  
>CD\_NM\_021155.2:408  
CgCtGcgagtctGGtatGATGGGTGAGCTTCCAGAGAAATTTCAAGAGAATTTCTCTGGAAGCTCACCCACTTTTTGct  
cgagctggcgaattcc  
>CD\_NM\_021155.2:615  
CgCtGcgagtctGGtatGATGGGTGAGCTTCCAGAGAAATTTCAAGAGAATTTCTCTGGAAGCTCACCCACTTTTTGct  
cgagctggcgaattcc  
>CD\_NM\_021155.2:916  
CgCtGcgagtctGGtatGCACAGCTGCAGTCTTCCAGAAGTTCAAGAGACTTCTGGAAGACTGCAGCTGTATTTTTGct  
cgagctggcgaattcc  
>CD\_NM\_021155.2:1107  
CgCtGcgagtctGGtatGAACAAATGTAATCTTGCCAAATTTCAAGAGAATTTGGCAAGATTACATTTGTCTTTTTGct  
cgagctggcgaattcc  
>CD\_NM\_021155.2:404  
CgCtGcgagtctGGtatGCGCAGTGGGTGAGCTTCCAGAGTTCAAGAGACTCTGGAAGCTCACCCACTGCATTTTTGct  
cgagctggcgaattcc  
>CD\_NM\_021155.2:611  
CgCtGcgagtctGGtatGCGCAGTGGGTGAGCTTCCAGAGTTCAAGAGACTCTGGAAGCTCACCCACTGCATTTTTGct  
cgagctggcgaattcc  
>CD\_NM\_021155.2:335  
CgCtGcgagtctGGtatGCGCAGTGGGTGAGCTTCCAGAGTTCAAGAGACTCTGGAAGCTCACCCACTGCATTTTTGct  
cgagctggcgaattcc  
>CD\_NM\_021155.2:680  
CgCtGcgagtctGGtatGCGCAGTGGGTGAGCTTCCAGAGTTCAAGAGACTCTGGAAGCTCACCCACTGCATTTTTGct  
cgagctggcgaattcc  
>CD\_NM\_021155.2:473  
CgCtGcgagtctGGtatGCGCAGTGGGTGAGCTTCCAGAGTTCAAGAGACTCTGGAAGCTCACCCACTGCATTTTTGct  
cgagctggcgaattcc  
>CD\_NM\_021155.2:542  
CgCtGcgagtctGGtatGCGCAGTGGGTGAGCTTCCAGAGTTCAAGAGACTCTGGAAGCTCACCCACTGCATTTTTGct  
cgagctggcgaattcc  
>CD\_NM\_021155.2:1155  
CgCtGcgagtctGGtatGCCCTGCTCCAGGGATGAAGAACTTCAAGAGAGTTCTTCATCCCTGGAGCAGGATTTTTGct  
cgagctggcgaattcc  
>CD\_NM\_021155.2:771  
CgCtGcgagtctGGtatGACCTGTCCCTGGGAATGGACATTTCAAGAGAATGTCCATTCAGGGACAGGGTTTTGct  
cgagctggcgaattcc  
>CD\_NM\_021155.2:956  
CgCtGcgagtctGGtatGAGGACTTTCAGATCTAAATCAGTTCAAGAGACTGATTTAGATCTGAAAGTCCCTTTTTGct  
cgagctggcgaattcc  
>CD\_NM\_021155.2:784

CgCctGcgagtctGGtatGCATGGACATTCCTCCAAGGAAATTC AAGAGATTCCTTGG AAGAATGTCCATTTTTTTGct  
cgagctggcgaattcc  
>CD\_NM\_021155.2:266  
CgCctGcgagtctGGtatGCGCAGTGGGTGAGCTCTCAGAGTTCAAGAGACTCTGAGAGCTCACCCACTGCATTTTTTTGct  
cgagctggcgaattcc  
>CD\_NM\_021155.2:201  
CgCctGcgagtctGGtatGCGCTCCATAAGTCAGGAACAATTTCAAGAGAATTGTTCTGACTTATGGAGCTTTTTTTGct  
cgagctggcgaattcc  
>CD\_NM\_021155.2:954  
CgCctGcgagtctGGtatGCTGGGACTTTCAGATCTAAATCTTCAAGAGAGATTTAGATCTGAAAGTCCCATTTTTTTGct  
cgagctggcgaattcc  
>CD\_NM\_021155.2:920  
CgCctGcgagtctGGtatGACTGCAGTCTTCCAGAAGTAACTTCAAGAGAGTTACTTCTGGAAGACTGCAGCTTTTTTTGct  
cgagctggcgaattcc  
>CD\_NM\_021155.2:1120  
CgCctGcgagtctGGtatGCTGCCAAATCTGGATCTGCAATTCAAGAGATTGCAGATCCAGAATTTGGCAATTTTTTTGct  
cgagctggcgaattcc  
>CD\_NM\_021155.2:749  
CgCctGcgagtctGGtatGCGCAGTGG AACGCCTGTGCCACTTCAAGAGAGTGGCACAGGCGTTCCACTGCATTTTTTTGct  
cgagctggcgaattcc  
>CD\_NM\_021155.2:281  
CgCctGcgagtctGGtatGATCAGAGAAATCCAAGCTGCAGTTCAAGAGACTGCAGCTTGGATTTCTCTGAGTTTTTTGct  
cgagctggcgaattcc  
>CD\_NM\_021155.2:1097  
CgCctGcgagtctGGtatGATGGAACGACGACAAATGTAATTTCAAGAGAATTACATTTGTCTGTTCCAGTTTTTTGct  
cgagctggcgaattcc  
>CD\_NM\_021155.2:952  
CgCctGcgagtctGGtatGAGATGGGACTTTCAGATCTAAATTC AAGAGATTTAGATCTGAAAGTCCCATCCTTTTTTTGct  
cgagctggcgaattcc  
>CD\_NM\_021155.2:137  
CgCctGcgagtctGGtatGAGTGCTGCAACTCCTCTCCTTCTTCAAGAGAGAAGGAGAGGAGTTGCAGCACCTTTTTTTGct  
cgagctggcgaattcc  
>CD\_NM\_021155.2:488  
CgCctGcgagtctGGtatGCCAGAGAAATCTAAGATGCAGTTCAAGAGACTGCATCTTAGATTTCTCTGGATTTTTTTGct  
cgagctggcgaattcc  
>CD\_NM\_021155.2:1144  
CgCctGcgagtctGGtatGCGTCCGCAGCCTCCTGCTCCAGTTCAAGAGACTGGAGCAGGAGGCTGCGGACTTTTTTTGct  
cgagctggcgaattcc  
>CD\_NM\_001558:249  
CgCctGcgagtctGGtatGATGGCGCTCCTGAGGTATGGAATTC AAGAGATTCATACCTCAGGAGCGCCACTTTTTTTGct  
cgagctggcgaattcc  
>CD\_NM\_001558:777  
CgCctGcgagtctGGtatGCACGT CATCATCTTCTTTGCCTTTCAAGAGAAGGCAAAGAAGATGATGACGTTTTTTTTGct  
cgagctggcgaattcc  
>CD\_NM\_001558.2:125  
CgCctGcgagtctGGtatGAGCTCAGACGCTCATGGGACAGTTCAAGAGACTGTCCCATGAGCGTCTGAGCCTTTTTTTGct  
cgagctggcgaattcc  
>CD\_NM\_001558.2:419  
CgCctGcgagtctGGtatGCCCGCTTCTCTGTGGATGAAGTTCAAGAGACTTCATCCACAGAGAAGCGGGTTTTTTTTGct  
cgagctggcgaattcc  
>CD\_NM\_001558.2:565  
CgCctGcgagtctGGtatGACGAGAGTATGAGATTGCCATTTTTCAAGAGAAATGGCAATCTCATACTCTCGGTTTTTTGct  
cgagctggcgaattcc  
>CD\_NM\_001558.2:1390

CgCctGcgagtctGGtatGCGCTGTGGCATTCCAGGGTTACTTCAAGAGAGTAACCCTGGAATGCCACAGCATTTTTTGct  
cgagctggcgaattcc  
>CD\_NM\_001558.2:874  
CgCctGcgagtctGGtatGAAGTGTCTCTTCAAGAAGTTCAAGAGACTTCTTGAAGAGCAGGACACTGTTTTTGct  
cgagctggcgaattcc  
>CD\_NM\_001558.2:1102  
CgCctGcgagtctGGtatGAGCTGACAGAACGCTGGGAACTTCAAGAGAGTTTCCCAGCGTTCTGTCAGCCTTTTTTGct  
cgagctggcgaattcc  
>CD\_NM\_001558.2:279  
CgCctGcgagtctGGtatGAGAACTCCATCTCCAAGTGTAGTTCAAGAGACTACAGTTGGAGATGGAGTTCCTTTTTTGct  
cgagctggcgaattcc  
>CD\_NM\_001558.2:393  
CgCctGcgagtctGGtatGAGCACTCCAAGTGGACCGTCACTTCAAGAGAGTGACGGTCCAGTTGGAGTGCCTTTTTTGct  
cgagctggcgaattcc  
>CD\_NM\_001558.2:451  
CgCctGcgagtctGGtatGCGTTGGCAGTGTGAACCTAGAGTTCAAGAGACTCTAGTTTCACTGCCAACTTTTTTGct  
cgagctggcgaattcc  
>CD\_NM\_001558.2:110  
CgCctGcgagtctGGtatGATCAGCTCCGTCTTGGCTCAGTTCAAGAGACTGAGCCAAGACGGAGGCTGAGTTTTTGct  
cgagctggcgaattcc  
>CD\_NM\_001558.2:735  
CgCctGcgagtctGGtatGCGGAGTGCATCTCCCTCACAGTTCAAGAGACTGGTGAGGGAGATGCACTCCTTTTTTGct  
cgagctggcgaattcc  
>CD\_NM\_001558.2:157  
CgCctGcgagtctGGtatGACCTCCGTCTGTGTGGTTTTGAATTCAAGAGATTCAAACCACACAGACGGAGGGTTTTTGct  
cgagctggcgaattcc  
>CD\_NM\_001558.2:325  
CgCctGcgagtctGGtatGAGCAGTGACCTTGGACCTGTACTTCAAGAGAGTACAGGTCCAAGGTCACTGCGTTTTTGct  
cgagctggcgaattcc  
>CD\_NM\_001558.2:777  
CgCctGcgagtctGGtatGCCGTCATCATCTTCTTTGCCTTTTTCAAGAGAAAGGCAAAGAAGATGATGACGTTTTTGct  
cgagctggcgaattcc  
>CD\_NM\_001558.2:829  
CgCctGcgagtctGGtatGATGCCTGGCCCTCCAGCTGTATTTCAAGAGAATACAGCTGGAGGGCCAGGCAGTTTTTGct  
cgagctggcgaattcc  
>CD\_NM\_001558.2:1671  
CgCctGcgagtctGGtatGCCCTGGGAATATCTGACTGGAGTTCAAGAGACTCCAGTCAGATATTTCCCAGGTTTTTGct  
cgagctggcgaattcc  
>CD\_NM\_001558.2:1545  
CgCctGcgagtctGGtatGACCTGGCCAAGGGCTATTTGAATTCAAGAGATTCAAATAGCCCTTGGCCAGGGTTTTTGct  
cgagctggcgaattcc  
>CD\_NM\_001558.2:155  
CgCctGcgagtctGGtatGCGCCCTCCGTCTGTGTGGTTTTGTTCAAGAGACAAACCACACAGACGGAGGGCTTTTTTGct  
cgagctggcgaattcc  
>CD\_NM\_001558.2:868  
CgCctGcgagtctGGtatGACTACCCAGTGTCTCTTCTTCAAGAGAGAAGAGCAGGACACTGGGTAGCTTTTTTGct  
cgagctggcgaattcc  
>CD\_NM\_001558.2:594  
CgCctGcgagtctGGtatGCGCCGGGAACTTCAAGAGAGTGAACGTGAAGTTTCCCAGCATTTTTTGct  
cgagctggcgaattcc  
>CD\_NM\_001558.2:444  
CgCctGcgagtctGGtatGATCTGACAGTTGGCAGTGTGAATTCAAGAGATTCACTGCCAACTGTCAGAGTTTTTGct  
cgagctggcgaattcc  
>CD\_NM\_001558.2:583



CgCctGcgagtctGGtatGAATTCGCAAGGTGCCGGGAAACTTCAAGAGAGTTTCCCGGCACCTTGCGAATGTTTTTGct  
cgagctggcgaattcc  
>CD\_NM\_001558.2:605  
CgCctGcgagtctGGtatGCTCACGTTACACACAAGAAAGTTCAAGAGACTTCTTGTGTGTGAACGTGAATTTTTTGct  
cgagctggcgaattcc  
>CD\_NM\_001558.2:1450  
CgCctGcgagtctGGtatGAACAGGCTGCCGGAGGAAGAATTCAAGAGATTCTTCCCTCCAGGCAGCCTGTCTTTTTTGct  
cgagctggcgaattcc  
>CD\_NM\_001558.2:694  
CgCctGcgagtctGGtatGCTCTGTCGCTTCCCGAAGTAACTTCAAGAGAGTTACTTCGGGAAGCGACAGATTTTTTGct  
cgagctggcgaattcc  
>CD\_NM\_001558.2:249  
CgCctGcgagtctGGtatGCGGCGCTCCTGAGGTATGGAATTTCAAGAGAATTCCATACCTCAGGAGCGCCATTTTTTGct  
cgagctggcgaattcc  
>CD\_NM\_001558.2:298  
CgCctGcgagtctGGtatGCAGCCAGACCCTGTCCATGACTTCAAGAGAGTCATAGGACAGGGTCTGGCTATTTTTTGct  
cgagctggcgaattcc  
>CD\_NM\_001558.2:1273  
CgCctGcgagtctGGtatGAAGTGGCATTGACTTAGTTCAATTCAAGAGATTGAACTAAGTCAATGCCACTGTTTTTGct  
cgagctggcgaattcc  
>CD\_NM\_001558.2:1384  
CgCctGcgagtctGGtatGACCAGCTGCTGTGGCATTCCAGTTCAGAGACTGGAATGCCACAGCAGCTGGGTTTTTGct  
cgagctggcgaattcc  
>CD\_NM\_001558.2:273  
CgCctGcgagtctGGtatGCGTCCCTGGAATCCATCTCCAATTCAAGAGATTGGAGATGGAGTTCCAGGACTTTTTTGct  
cgagctggcgaattcc  
>CD\_NM\_001558.2:690  
CgCctGcgagtctGGtatGCACCATCTGTCGCTTCCCGAAGTTCAAGAGACTTCGGGAAGCGACAGATGGTTTTTTTTGct  
cgagctggcgaattcc  
>CD\_NM\_153701:1011  
CgCctGcgagtctGGtatGCGGCTGTCACTCCTCGAACCATTCAAGAGATGGTTCGAGGAGATGACAGCCATTTTTTGct  
cgagctggcgaattcc  
>CD\_NM\_153701:206  
CgCctGcgagtctGGtatGCGGGACCTGAGATGCTATCGGATTCAAGAGATCCGATAGCATCTCAGGTCCTTTTTTTTGct  
cgagctggcgaattcc  
>CD\_NM\_153701:455  
CgCctGcgagtctGGtatGATGCAGCTCTACAACCTCAGTTATTCAAGAGATAACTGAGTTGTAGAGCTGCAGTTTTTGct  
cgagctggcgaattcc  
>CD\_NM\_153701:482  
CgCctGcgagtctGGtatGAAGCCTCCTCTGGGAGACATCATTCAAGAGATGATGTCTCCAGAGGAGGCTCTTTTTTGct  
cgagctggcgaattcc  
>CD\_NM\_153701:619  
CgCctGcgagtctGGtatGATGCGGACCTCAGGATGATGATTTCAAGAGAATCATCATCTGAGGTCCGCAGTTTTTGct  
cgagctggcgaattcc  
>CD\_NM\_153701:458  
CgCctGcgagtctGGtatGAAGCTCTACAACCTCAGTTAAATTTCAAGAGAATTTAACTGAGTTGTAGAGCTGTTTTTGct  
cgagctggcgaattcc  
>CD\_NM\_005535:771  
CgCctGcgagtctGGtatGACCCACAGCCTCAGGTGAGATTTTTCAAGAGAAATCTCACCTGAGGCTGTGGGTTTTTGct  
cgagctggcgaattcc  
>CD\_NM\_005535:206  
CgCctGcgagtctGGtatGCGGGACCTGAGATGCTATCGGATTCAAGAGATCCGATAGCATCTCAGGTCCTTTTTTTTGct  
cgagctggcgaattcc  
>CD\_NM\_005535:1011

CgCctGcgagtctGGtatGCGGCTGTCATCTCCTCGAACCATTCAAGAGATGGTTCGAGGAGATGACAGCCATTTTTTGct  
cgagctggcgaattcc  
>CD\_NM\_005535:162  
CgCctGcgagtctGGtatGCCCCGCCATATCCGGATGCAGATTCAAGAGATCTGCATCCGGATATGGCGGGTTTTTTTGct  
cgagctggcgaattcc  
>CD\_NM\_005535:482  
CgCctGcgagtctGGtatGAAGCCTCCTCTGGGAGACATCATTCAAGAGATGATGTCTCCAGAGGAGGCTCTTTTTTGct  
cgagctggcgaattcc  
>CD\_NM\_005535:455  
CgCctGcgagtctGGtatGATGCAGCTCTACAACCTCAGTTATTCAAGAGATAACTGAGTTGTAGAGCTGCAGTTTTTTGct  
cgagctggcgaattcc  
>CD\_NM\_005535:458  
CgCctGcgagtctGGtatGAAGCTCTACAACCTCAGTTAAATTTCAAGAGAATTTAACTGAGTTGTAGAGCTGTTTTTTGct  
cgagctggcgaattcc  
>CD\_NM\_005535.1:1692  
CgCctGcgagtctGGtatGCTCTGATTGGCTCATCTTCTTCTTCAAGAGAGAAGAAGATGAGCCAATCAGAATTTTTTGct  
cgagctggcgaattcc  
>CD\_NM\_005535.1:392  
CgCctGcgagtctGGtatGATGTCACACTCTGGGTGGAATCTTCAAGAGAGATTCCACCCAGAGTGTGACAGTTTTTTGct  
cgagctggcgaattcc  
>CD\_NM\_005535.1:825  
CgCctGcgagtctGGtatGACGGCTGACCCCTGAAAGAGCAGTTCAAGAGACTGCTCTTTCAGGGTCAGCCGCTTTTTTGct  
cgagctggcgaattcc  
>CD\_NM\_005535.1:1148  
CgCctGcgagtctGGtatGATCAGAGCATGACGTATTGCATTTCAAGAGAATGCAATACGTCATGCTCTGAGTTTTTTGct  
cgagctggcgaattcc  
>CD\_NM\_005535.1:206  
CgCctGcgagtctGGtatGAGGACCTGAGATGCTATCGGATTTCAAGAGAATCCGATAGCATCTCAGGTCCCTTTTTTGct  
cgagctggcgaattcc  
>CD\_NM\_005535.1:1872  
CgCctGcgagtctGGtatGACCAGTGGACTTCCAGGAAGAGTTCAAGAGACTCTTCCTGGAAGTCCACTGGGTTTTTTGct  
cgagctggcgaattcc  
>CD\_NM\_005535.1:1743  
CgCctGcgagtctGGtatGCCTCGTGGGCGTCCTTGGCTACTTCAAGAGAGTAGCCAAGGACGCCCACGAGATTTTTTGct  
cgagctggcgaattcc  
>CD\_NM\_005535.1:1482  
CgCctGcgagtctGGtatGATGTCCC GCGTCCTAAAGGAGTTCAAGAGACTCCTTTAGGACGCCGGGACAGTTTTTTGct  
cgagctggcgaattcc  
>CD\_NM\_005535.1:920  
CgCctGcgagtctGGtatGCCACATGCTGTCTGCCCCGTGTTCAAGAGACACGGGCAGGACAGCATGTGGATTTTTTGct  
cgagctggcgaattcc  
>CD\_NM\_005535.1:287  
CgCctGcgagtctGGtatGCCTTCCTGCGGTGTTGCCTTAGTTCAAGAGACTAAGGCAACACCGCAGGAAGTTTTTTGct  
cgagctggcgaattcc  
>CD\_NM\_005535.1:1559  
CgCctGcgagtctGGtatGCGCCCACAGAGACCCAAGTTACTTCAAGAGAGTAACTTGGGTCTCTGTGGGCTTTTTTTGct  
cgagctggcgaattcc  
>CD\_NM\_005535.1:1611  
CgCctGcgagtctGGtatGAACGGTGCAGGTGCGAGCAGACTTCAAGAGAGTCTGCTCGCACCTGCACCGTGTTTTTTGct  
cgagctggcgaattcc  
>CD\_NM\_005535.1:1013  
CgCctGcgagtctGGtatGATGTCATCTCCTCGAACCAATTTTCAAGAGAAATGGTTCGAGGAGATGACAGTTTTTTGct  
cgagctggcgaattcc  
>CD\_NM\_005535.1:1407

CgCctGcgagtctGGtatGCCCCGACCACGTCTCGGTGAAGTTCAAGAGACTTCACCGAGACGTGGTGCGGTTTTTTGct  
cgagctggcgaattcc  
>CD\_NM\_005535.1:771  
CgCctGcgagtctGGtatGACCACAGCCTCAGGTGAGATTCTTCAAGAGAGAATCTCACCTGAGGCTGTGGGTTTTTTGct  
cgagctggcgaattcc  
>CD\_NM\_005535.1:1210  
CgCctGcgagtctGGtatGCGCAGCCTGACTGCGCCGCAAGTTCAAGAGACTTGCGGCGCAGTCAGGCTGCATTTTTTGct  
cgagctggcgaattcc  
>CD\_NM\_005535.1:935  
CgCctGcgagtctGGtatGACCCGTGTAAGGCCAAGGCCACTTCAAGAGAGTGGCCTTGGCCTTACACGGGCTTTTTTGct  
cgagctggcgaattcc  
>CD\_NM\_005535.1:1439  
CgCctGcgagtctGGtatGCGGACTCTGTGTCGTGGACTGTTCAAGAGACAGTCCACAGACACAGAGTCCATTTTTTGct  
cgagctggcgaattcc  
>CD\_NM\_005535.1:390  
CgCctGcgagtctGGtatGAACTGTCACACTCTGGGTGGAATTCAAGAGATTCCACCCAGAGTGTGACAGTGTTTTTTGct  
cgagctggcgaattcc  
>CD\_NM\_005535.1:624  
CgCctGcgagtctGGtatGCCCTCAGGATGATGATACTGAGTTCAAGAGACTCAGTATCATCATCTGAGGTTTTTTTGct  
cgagctggcgaattcc  
>CD\_NM\_001560:279  
CgCctGcgagtctGGtatGATCCGAAACTCGTCTCAATTTCAAGAGAATTGAACGACGAGTTTCCGGAGTTTTTTGct  
cgagctggcgaattcc  
>CD\_NM\_001560:496  
CgCctGcgagtctGGtatGCACCAGTCCCGACACTAATAATTTCAAGAGAATAGTTAGTGTGCGGACTGGTATTTTTTGct  
cgagctggcgaattcc  
>CD\_NM\_001560:647  
CgCctGcgagtctGGtatGATCCAAATAATGGTCAAGGATATTCAAGAGATATCCTTGACCATTATTTGGACTTTTTTGct  
cgagctggcgaattcc  
>CD\_NM\_001560:723  
CgCctGcgagtctGGtatGCACCTGATCCTCCACATATTAATTCAAGAGATTAATATGTGGAGGATCAGGTTTTTTTGct  
cgagctggcgaattcc  
>CD\_NM\_001560:751  
CgCctGcgagtctGGtatGATCCTTCCACAATGATGACCTATTCAAGAGATAGGTCATCATTGTGGAAGGAGTTTTTTGct  
cgagctggcgaattcc  
>CD\_NM\_001560.2:647  
CgCctGcgagtctGGtatGCCCAAATAATGGTCAAGGATAATTCAAGAGATTATCCTTGACCATTATTTGGATTTTTTGct  
cgagctggcgaattcc  
>CD\_NM\_001560.2:892  
CgCctGcgagtctGGtatGCATCCAGAAATTTGAGAGAAATGTTCAAGAGACATTTCTCTCAAATTCTGGATTTTTTTGct  
cgagctggcgaattcc  
>CD\_NM\_001560.2:951  
CgCctGcgagtctGGtatGCCCTGATACTTTGAACACAGTCTTCAAGAGAGACTGTGTTCAAAGTATCAGGATTTTTTGct  
cgagctggcgaattcc  
>CD\_NM\_001560.2:1146  
CgCctGcgagtctGGtatGCAGGCTCAAGATTATTATATTCTTCAAGAGAGAATATAATAATCTTGAGCCTTTTTTTGct  
cgagctggcgaattcc  
>CD\_NM\_001560.2:636  
CgCctGcgagtctGGtatGCCAACACAGTGTCCAAATAATGTTCAAGAGACATTATTTGGACACTGTGTTGTTTTTTGct  
cgagctggcgaattcc  
>CD\_NM\_001560.2:214  
CgCctGcgagtctGGtatGACCAGCTCAAATTTGTAGTCTATTTCAAGAGAATAGACTACAATTTGAGCTGGCTTTTTTGct  
cgagctggcgaattcc  
>CD\_NM\_001560.2:1221

CgCtGcgagtctGGtatGCGATGATACTCTGCACTGGAAGTTCAAGAGACTTCCAGTGCAGAGTATCATCATTTTTTGct  
cgagctggcgaattcc  
>CD\_NM\_001560.2:427  
CgCtGcgagtctGGtatGATGACTGAGCTTCAATGCATTTTTCAAGAGAAAATGCATTGAAGCTCAGTCACTTTTTTGct  
cgagctggcgaattcc  
>CD\_NM\_001560.2:708  
CgCtGcgagtctGGtatGCACTTCCCGTGTGAAACCTGATTTCAAGAGAATCAGGTTTACACGGGAAGTTTTTTTGct  
cgagctggcgaattcc  
>CD\_NM\_001560.2:838  
CgCtGcgagtctGGtatGCACAGCCAAACTGAGACACATATTCAAGAGATATGTGTCTCAGTTTGGCTGTTTTTTTGct  
cgagctggcgaattcc  
>CD\_NM\_001560.2:341  
CgCtGcgagtctGGtatGACCAGTGTAGCACCAATGAGAGTTCAAGAGACTCTCATTGGTGCTACACTGGGTTTTTTGct  
cgagctggcgaattcc  
>CD\_NM\_001560.2:412  
CgCtGcgagtctGGtatGAATCCTGAGTCTGCTGTGACTGTTCAAGAGACAGTCACAGCAGACTCAGGATTTTTTTGct  
cgagctggcgaattcc  
>CD\_NM\_001560.2:751  
CgCtGcgagtctGGtatGCCCTTCCACAATGATGACCTATTTCAAGAGAATAGGTCATCATTGTGGAAGGATTTTTTTGct  
cgagctggcgaattcc  
>CD\_NM\_001560.2:1010  
CgCtGcgagtctGGtatGCTGACAAACTCTGGAGTAATTGTTCAAGAGACAATTACTCCAGAGTTTGTCATTTTTTGct  
cgagctggcgaattcc  
>CD\_NM\_001560.2:877  
CgCtGcgagtctGGtatGAAGGCTAAATGTGAGAATCCAGTTCAAGAGACTGGATTCTCACATTTAGCCTTTTTTTGct  
cgagctggcgaattcc  
>CD\_NM\_001560.2:1105  
CgCtGcgagtctGGtatGCTCGTCGAGGTGCAATCATAGTTCAAGAGACTATGATTGCACCTGCGACGATTTTTTTGct  
cgagctggcgaattcc  
>CD\_NM\_001560.2:914  
CgCtGcgagtctGGtatGCGGAGAATACATCTTGTTCATTTCAAGAGAATGAAACAAGATGTATTCTCATTTTTTTTGct  
cgagctggcgaattcc  
>CD\_NM\_001560.2:277  
CgCtGcgagtctGGtatGACTCCGAAACTCGTCTTCAATTTCAAGAGATTGAACGACGAGTTTCCGGAGCTTTTTTTGct  
cgagctggcgaattcc  
>CD\_NM\_001560.2:219  
CgCtGcgagtctGGtatGATCAAATTGTAGTCTATGGTATTTCAAGAGAATACCATAGACTACAATTTGAGTTTTTTGct  
cgagctggcgaattcc  
>CD\_NM\_001560.2:723  
CgCtGcgagtctGGtatGCCCTGATCCTCCACATATTAATTTCAAGAGATTTAATATGTGGAGGATCAGGTTTTTTGct  
cgagctggcgaattcc  
>CD\_NM\_001560.2:414  
CgCtGcgagtctGGtatGCCCTGAGTCTGCTGTGACTGAGTTCAAGAGACTCAGTCACAGCAGACTCAGGATTTTTTTGct  
cgagctggcgaattcc  
>CD\_NM\_001560.2:571  
CgCtGcgagtctGGtatGCTTAGAGAAGGCCAATACTTTGTTCAAGAGACAAAGTATTGGCCTTCTCTAAATTTTTTTGct  
cgagctggcgaattcc  
>CD\_NM\_001560.2:936  
CgCtGcgagtctGGtatGAGTCCCTGGTGTCTTCTCTGATTTCAAGAGAATCAGGAAGAACCAGGGACCTTTTTTTGct  
cgagctggcgaattcc  
>CD\_NM\_001560.2:1008  
CgCtGcgagtctGGtatGAGATGACAAACTCTGGAGTAATTTCAAGAGAATTAATCCAGAGTTTGTCACTTTTTTTGct  
cgagctggcgaattcc  
>CD\_NM\_001560.2:209

CgCctGcgagtctGGtatGCGGGAGCCAGCTCAAATTGTAGTTCAAGAGACTACAATTTGAGCTGGCTCCCTTTTTTTGct  
cgagctggcgaattcc  
>CD\_NM\_001560.2:1110  
CgCctGcgagtctGGtatGAGCAGGTGCAATCATAGTACTCTTCAAGAGAGAGTACTATGATTGCACCTGCGTTTTTTGct  
cgagctggcgaattcc  
>CD\_NM\_001560.2:449  
CgCctGcgagtctGGtatGAGCACAACTGAGCTACATGAATTC AAGAGATTCATGTAGCTCAGGTTGTGCCTTTTTTGct  
cgagctggcgaattcc  
>CD\_NM\_001560.2:358  
CgCctGcgagtctGGtatGAAGAGTGAGAAGCCTAGCATTTTTCAAGAGAAAATGCTAGGCTTCTCACTCTTTTTTGct  
cgagctggcgaattcc  
>CD\_NM\_000640:152  
CgCctGcgagtctGGtatGCTGCTTATATACCTTTCTGATATTCAAGAGATATCAGAAAGGTATATAAGCATTTTTTGct  
cgagctggcgaattcc  
>CD\_NM\_000640:253  
CgCctGcgagtctGGtatGACGGATACTTAGGTTATCTCTATTCAAGAGATAGAGATAACCTAAGTATCCGGTTTTTTGct  
cgagctggcgaattcc  
>CD\_NM\_000640:546  
CgCctGcgagtctGGtatGAAGGATATGGATTGCGTATATTTTTCAAGAGAAATATACGCAATCCATATCCTGTTTTTTGct  
cgagctggcgaattcc  
>CD\_NM\_000640:557  
CgCctGcgagtctGGtatGCTGCGTATATTACAATTGGCAATTC AAGAGATTGCCAATTGTAATATACGCAATTTTTTGct  
cgagctggcgaattcc  
>CD\_NM\_000640:1146  
CgCctGcgagtctGGtatGCTGCTACGTTTCTGGCTACCATTTCAAGAGAATGGTAGCCAGAAACGTAGCAATTTTTTGct  
cgagctggcgaattcc  
>CD\_NM\_000640:1162  
CgCctGcgagtctGGtatGCACCATTTGGTTTCATCTTAATTTCAAGAGAATTAAGATGAAACCAAATGGTATTTTTTGct  
cgagctggcgaattcc  
>CD\_NM\_000640:867  
CgCctGcgagtctGGtatGAGGGAGAGTTCATGTGAAATTATTCAAGAGATAATTTACATGAACTCTCCGTTTTTTGct  
cgagctggcgaattcc  
>CD\_NM\_000640.2:1048  
CgCctGcgagtctGGtatGCAGAAGCAAAGTGAATATTTATTTCAAGAGAATAAATATTCACTTTGCTTCTTTTTTTGct  
cgagctggcgaattcc  
>CD\_NM\_000640.2:1112  
CgCctGcgagtctGGtatGCGCTGGGAAGGTGAAGACCTATTTCAAGAGAATAGGTCTTCACCTTCCCAGCATTTTTTGct  
cgagctggcgaattcc  
>CD\_NM\_000640.2:364  
CgCctGcgagtctGGtatGCTGGAAGACCATCATTACTAAGTTCAAGAGACTTAGTAATGATGGTCTTCCATTTTTTTGct  
cgagctggcgaattcc  
>CD\_NM\_000640.2:578  
CgCctGcgagtctGGtatGCATTTACTCTGTTCTTGGAACTTCAAGAGAGTTTCCAAGAACAGAGTAAATATTTTTTGct  
cgagctggcgaattcc  
>CD\_NM\_000640.2:141  
CgCctGcgagtctGGtatGCGGCTATCGGATGCTTATATACTTCAAGAGAGTATATAAGCATCCGATAGCCATTTTTTGct  
cgagctggcgaattcc  
>CD\_NM\_000640.2:650  
CgCctGcgagtctGGtatGAAGGGCTTGATCATGCATTACTTCAAGAGAGTAATGCATGATCCAAGCCCTTTTTTTGct  
cgagctggcgaattcc  
>CD\_NM\_000640.2:867  
CgCctGcgagtctGGtatGAGGAGAGTTCATGTGAAATTAATTC AAGAGATTAATTTACATGAACTCTCCCTTTTTTGct  
cgagctggcgaattcc  
>CD\_NM\_000640.2:259

CgCctGcgagtctGGtatGATTAGGTTATCTCTATTTGCAATTCAAGAGATTGCAAATAGAGATAACCTAAGTTTTTGct  
cgagctggcgaattcc  
>CD\_NM\_000640.2:379  
CgCctGcgagtctGGtatGCACTAAGAATCTACATTACAAATTCAGAGATTTGTAATGTAGATTCTTAGTATTTTTGct  
cgagctggcgaattcc  
>CD\_NM\_000640.2:126  
CgCctGcgagtctGGtatGCGGCTTTCGTTTGGCTATTTCAAGAGAATAGCCAAGCAAACGAAAGCCATTTTTGct  
cgagctggcgaattcc  
>CD\_NM\_000640.2:341  
CgCctGcgagtctGGtatGCACCGAAACATTGGTAGTGAAATTCAGAGATTTCACTACCAATGTTTCGGTATTTTTGct  
cgagctggcgaattcc  
>CD\_NM\_000640.2:1162  
CgCctGcgagtctGGtatGCCATTTGGTTTCATCTTAATATTCAAGAGATATTAAGATGAAACCAAATGGTTTTTTGct  
cgagctggcgaattcc  
>CD\_NM\_000640.2:676  
CgCctGcgagtctGGtatGCGTTGATTACATCAAGGCTGATTTCAAGAGAATCAGCCTTGATGTAATCAACATTTTTGct  
cgagctggcgaattcc  
>CD\_NM\_000640.2:1086  
CgCctGcgagtctGGtatGCTTGGAGTGAGTGGAGTGATAATTCAGAGATTATCACTCCACTCACTCCAAATTTTTGct  
cgagctggcgaattcc  
>CD\_NM\_000640.2:576  
CgCctGcgagtctGGtatGCATATTTACTCTGTTCTTGAATTCAAGAGATTCGAAGAACAGAGTAAATATTTTTTTGct  
cgagctggcgaattcc  
>CD\_NM\_000640.2:752  
CgCctGcgagtctGGtatGCTCTATATTTGTGTTAATGGATTTCAAGAGAATCCATTAACACAAATATAGAATTTTTGct  
cgagctggcgaattcc  
>CD\_NM\_000640.2:1161  
CgCctGcgagtctGGtatGCACCATTTGGTTTCATCTTAATTTCAAGAGAATTAAGATGAAACCAAATGGTATTTTTGct  
cgagctggcgaattcc  
>CD\_NM\_000640.2:613  
CgCctGcgagtctGGtatGCCTTCTTGATACCAATTACAAC TTCAGAGAGTTGTAATTGGTATCAAGAAGTTTTTTGct  
cgagctggcgaattcc  
>CD\_NM\_000640.2:791  
CgCctGcgagtctGGtatGCTCAGATCCAGTTATTTCACTTTTCAAGAGAAAGTGAATAACTGGATCTGATTTTTTTGct  
cgagctggcgaattcc  
>CD\_NM\_000640.2:138  
CgCctGcgagtctGGtatGACTTGGCTATCGGATGCTTATATTCAAGAGATATAAGCATCCGATAGCCAAGCTTTTTGct  
cgagctggcgaattcc  
>CD\_NM\_000640.2:1088  
CgCctGcgagtctGGtatGCGGAGTGAGTGGAGTGATAAACTTCAAGAGAGTTTATCACTCCACTCACTCCATTTTTGct  
cgagctggcgaattcc  
>CD\_NM\_000640.2:1029  
CgCctGcgagtctGGtatGAACAATTATGCTTTGTAGTAAGTTCAAGAGACTTACTACAAAGCATAATTGTCTTTTTGct  
cgagctggcgaattcc  
>CD\_NM\_000640.2:869  
CgCctGcgagtctGGtatGAAGAGTTCATGTGAAATTAAGCTTCAAGAGAGCTTAATTTACATGAACTCTCTTTTTGct  
cgagctggcgaattcc  
>CD\_NM\_000640.2:1091  
CgCctGcgagtctGGtatGCGTGAGTGGAGTGATAACAATTTCAAGAGAATTGTTTATCACTCCACTCACTTTTTTTGct  
cgagctggcgaattcc  
>CD\_NM\_000640.2:480  
CgCctGcgagtctGGtatGCTCAAAGTTCTGGGCAGAACTTCAAGAGAGTTTCTGCCAGGAACTTTGAATTTTTGct  
cgagctggcgaattcc  
>CD\_NM\_000640.2:968

CgCctGcgagtctGGtatGCCCTTGGTACTGCTACAGTTGTTCAAGAGACAACCTGTAGCAGTCACCAAGGTTTTTTGct  
cgagctggcgaattcc  
>CD\_NM\_014339:1085  
CgCctGcgagtctGGtatGACCCTGTGGGTGTACTGGTTCATTCAAGAGATGAACCAGTACACCCACAGGGTTTTTTGct  
cgagctggcgaattcc  
>CD\_NM\_014339:1442  
CgCctGcgagtctGGtatGATGGAGAGCAACTCTAAGATCATTCAAGAGATGATCTTAGAGTTGCTCTCCACTTTTTTGct  
cgagctggcgaattcc  
>CD\_NM\_014339:1027  
CgCctGcgagtctGGtatGAGCGACTGTTTCCTGCCAGAATTCAAGAGATTCTGGGCAGGAAACAGTCGCGTTTTTTGct  
cgagctggcgaattcc  
>CD\_NM\_014339:1562  
CgCctGcgagtctGGtatGAACCTGTTCACTGCAGCCATGATTCAAGAGATCATGGCTGCAGTGAACAGGTCTTTTTGct  
cgagctggcgaattcc  
>CD\_NM\_014339:1259  
CgCctGcgagtctGGtatGCAGCCCAGGAAGGTCTGGATCATTCAAGAGATGATCCAGACCTTCTGGGCTTTTTTTGct  
cgagctggcgaattcc  
>CD\_NM\_014339:926  
CgCctGcgagtctGGtatGCACGTCACACTACTCTACGCATTCAAGAGATGCGTAGAGTGAGTGTGACGTTTTTTGct  
cgagctggcgaattcc  
>CD\_NM\_014339:1620  
CgCctGcgagtctGGtatGCCGGCACCTACGTAGTCTGCTATTCAAGAGATAGCAGACTACGTAGGTGCCGATTTTTGct  
cgagctggcgaattcc  
>CD\_NM\_014339:1612  
CgCctGcgagtctGGtatGCGCCTGCTTCGGCACCTACGTATTCAAGAGATACGTAGGTGCCGAAGCAGGCTTTTTTTGct  
cgagctggcgaattcc  
>CD\_NM\_014339.3:518  
CgCctGcgagtctGGtatGCTGAGTTTCTGTCCAACTGAGTTCAAGAGACTCAGTTTGGACAGAACTCAATTTTTGct  
cgagctggcgaattcc  
>CD\_NM\_014339.3:1625  
CgCctGcgagtctGGtatGACTACGTAGTCTGCTACTTCAGTTCAAGAGACTGAAGTAGCAGACTACGTAGGTTTTTGct  
cgagctggcgaattcc  
>CD\_NM\_014339.3:1442  
CgCctGcgagtctGGtatGCGGAGAGCAACTCTAAGATCATTTCAGAGAATGATCTTAGAGTTGCTCTCATTTTTTGct  
cgagctggcgaattcc  
>CD\_NM\_014339.3:1362  
CgCctGcgagtctGGtatGAGCCCTGGACCTGCTGGAAGAGTTCAAGAGACTCTTCCAGCAGGTCCAGGGCCTTTTTGct  
cgagctggcgaattcc  
>CD\_NM\_014339.3:2337  
CgCctGcgagtctGGtatGATCTCCTGACCTCCTTCCAGAGTTCAAGAGACTCTGGAAGGAGGTCAGGAGACTTTTTGct  
cgagctggcgaattcc  
>CD\_NM\_014339.3:932  
CgCctGcgagtctGGtatGAACTCACTCTACGCAACCTTAATTCAAGAGATTAAGGTTGCGTAGAGTGAGTGTTTTTGct  
cgagctggcgaattcc  
>CD\_NM\_014339.3:2490  
CgCctGcgagtctGGtatGACGGCAGTCAGTGCAGTCTGACTTCAAGAGAGTCAGACTGCACTGACTGCCGTTTTTTGct  
cgagctggcgaattcc  
>CD\_NM\_014339.3:1048  
CgCctGcgagtctGGtatGCTGCCAGACTCCAGAACCAATTCAAGAGATTGGTCTGGAGTGTCTGGCATTTTTTGct  
cgagctggcgaattcc  
>CD\_NM\_014339.3:477  
CgCctGcgagtctGGtatGCGTCTGCAGCTGAACACCAATTTCAAGAGAATTGGTGTTCAGCTGCAGGACATTTTTGct  
cgagctggcgaattcc  
>CD\_NM\_014339.3:963

CgCctGcgagtctGGtatGCCGCCACCAAGTGCAGATCCAGTTCAAGAGACTGGATCTGCACTTGGTGGCGATTTTTTGct  
cgagctggcgaattcc  
>CD\_NM\_014339.3:1875  
CgCctGcgagtctGGtatGCCCCGACTGGTTCGAATGTGAGTTCAAGAGACTCACATTCGAACCAGTCGGGATTTTTTGct  
cgagctggcgaattcc  
>CD\_NM\_014339.3:791  
CgCctGcgagtctGGtatGACTTCACCCCTGTGGAACGAATCTTCAAGAGAGATTCGTTCCACAGGGTGAAGCTTTTTTGct  
cgagctggcgaattcc  
>CD\_NM\_014339.3:2442  
CgCctGcgagtctGGtatGCCCCGCCATGGTCCCTCACAGACTTCAAGAGAGTCTGTGAGGACCATGGCGGGTTTTTTTGct  
cgagctggcgaattcc  
>CD\_NM\_014339.3:974  
CgCctGcgagtctGGtatGCGCAGATCCAGCCCTTCTTCAGTTCAAGAGACTGAAGAAGGGCTGGATCTGCATTTTTTGct  
cgagctggcgaattcc  
>CD\_NM\_014339.3:1145  
CgCctGcgagtctGGtatGCGCTCATCGTCTGCATGACCTGTTCAAGAGACAGGTCATGCAGACGATGAGCATTTTTTGct  
cgagctggcgaattcc  
>CD\_NM\_014339.3:225  
CgCctGcgagtctGGtatGATCCCTGCGACTCCTGGACCCTTCAAGAGAGTGGTCCAGGAGTCGCAGGGAGTTTTTGct  
cgagctggcgaattcc  
>CD\_NM\_014339.3:514  
CgCctGcgagtctGGtatGCGGTTTGAGTTTCTGTCCAACTTCAAGAGAGTTTGGACAGAACTCAAACCTTTTTTGct  
cgagctggcgaattcc  
>CD\_NM\_014339.3:1085  
CgCctGcgagtctGGtatGACCTGTGGGTGTACTGGTTCATTTCAAGAGAATGAACCAGTACACCCACAGGGTTTTTTGct  
cgagctggcgaattcc  
>CD\_NM\_014339.3:2387  
CgCctGcgagtctGGtatGCGCTCTCGCTCTTCGAGCAGAGTTCAAGAGACTCTGCTCGAAGAGCGAGAGCATTTTTTGct  
cgagctggcgaattcc  
>CD\_NM\_014339.3:2352  
CgCctGcgagtctGGtatGCCAGAGGACGTGAGGGAGCACTTCAAGAGAGTGTCCCTCACGTCCCTTGATTTTTTGct  
cgagctggcgaattcc  
>CD\_NM\_014339.3:348  
CgCctGcgagtctGGtatGACCAAAGGACCTGCAGATCCAGTTCAAGAGACTGGATCTGCAGGTCCTTTGGTTTTTTGct  
cgagctggcgaattcc  
>CD\_NM\_014339.3:2664  
CgCctGcgagtctGGtatGCTTCCGCCAGCTGCAGAAGAACTTCAAGAGAGTTCTTCTGCAGCTGGCGGAAATTTTTTGct  
cgagctggcgaattcc  
>CD\_NM\_014339.3:1142  
CgCctGcgagtctGGtatGCCCTGCTCATCGTCTGCATGACTTCAAGAGAGTCATGCAGACGATGAGCAGGATTTTTTGct  
cgagctggcgaattcc  
>CD\_NM\_014339.3:609  
CgCctGcgagtctGGtatGAACCGTTCACCACCTGCCCAAGTTCAAGAGACTTGGGCAGGTGGTGAACGGTCTTTTTTGct  
cgagctggcgaattcc  
>CD\_NM\_014339.3:1121  
CgCctGcgagtctGGtatGCCCTGCTGGTGGGCTCCGTCATTTCAAGAGAATGACGGAGCCCACCAGCAGGATTTTTTGct  
cgagctggcgaattcc  
>CD\_NM\_003855:1527  
CgCctGcgagtctGGtatGAGCCGATAAATCTCTTTCTTATTTCAAGAGAATAAGAAAGAGATTTATCGGCCTTTTTTGct  
cgagctggcgaattcc  
>CD\_NM\_003855:577  
CgCctGcgagtctGGtatGCGCGTGCATTTCTTCATCATATTCAAGAGATATGATGAAGGAAATGCACGCATTTTTTGct  
cgagctggcgaattcc  
>CD\_NM\_003855.2:375



CgCctGcgagtctGGtatGCGCTGTTTCACTGAAAGACAAGTTCAAGAGACTTGTCTTTCAGTGAAACAGCTTTTTTGGct  
cgagctggcgaattcc  
>CD\_NM\_003855.2:1337  
CgCctGcgagtctGGtatGCCTAATCATTGTCCTAAGTAAATTTCAAGAGATTTACTTAGGACAATGATTAGTTTTTGGct  
cgagctggcgaattcc  
>CD\_NM\_003855.2:1307  
CgCctGcgagtctGGtatGCATCCACTCACTGATAGAGAAATTTCAAGAGATTTCTCTATCAGTGAGTGGATTTTTTGGct  
cgagctggcgaattcc  
>CD\_NM\_003855.2:332  
CgCctGcgagtctGGtatGCACTCAGAAATGGAAATTAATTTCAAGAGAATTTAATTTCCATTTCTGAGTATTTTTGGct  
cgagctggcgaattcc  
>CD\_NM\_003855.2:575  
CgCctGcgagtctGGtatGATGCGTGCATTTCCCTTCATCATTTCAGAGAAATGATGAAGGAAATGCACGCAGTTTTTGGct  
cgagctggcgaattcc  
>CD\_NM\_003855.2:75  
CgCctGcgagtctGGtatGCCTGCAGAAATCTTGTACTTCACTTCAAGAGAGTGAAGTACAAGATTCTGCAGTTTTTGGct  
cgagctggcgaattcc  
>CD\_NM\_003855.2:1056  
CgCctGcgagtctGGtatGATGACTGTGTGTGCATTTATATTCAAGAGATATAAATGACACACACAGTCACTTTTTGGct  
cgagctggcgaattcc  
>CD\_NM\_003855.2:1110  
CgCctGcgagtctGGtatGCCGAGAAGAGATGAAACATTAATTTCAAGAGATTAATGTTTCATCTCTTCTCGTTTTTGGct  
cgagctggcgaattcc  
>CD\_NM\_003855.2:734  
CgCctGcgagtctGGtatGATCTGCTTTGCTGAATGAAGAGTTCAAGAGACTTTCATTCAGCAAAGCAGAGTTTTTGGct  
cgagctggcgaattcc  
>CD\_NM\_003855.2:1054  
CgCctGcgagtctGGtatGCAGTGAAGTGTGTGCATTTATTTCAAGAGATAAATGACACACACAGTCACTATTTTTGGct  
cgagctggcgaattcc  
>CD\_NM\_003855.2:1526  
CgCctGcgagtctGGtatGAGCCGATAAATCTCTTTCTTATTTCAAGAGAAATAAGAAAGAGATTTATCGGCTTTTTGGct  
cgagctggcgaattcc  
>CD\_NM\_003855.2:1076  
CgCctGcgagtctGGtatGCAGAGTTGACTTGGTTCATTTTTTCAAGAGAAAATAGAACCAAGTCAACTCTATTTTTGGct  
cgagctggcgaattcc  
>CD\_NM\_003855.2:469  
CgCctGcgagtctGGtatGCCAACAGCACATCATTGTATAAATTTCAAGAGATTATACAATGATGTGCTGTTGATTTTTGGct  
cgagctggcgaattcc  
>CD\_NM\_003855.2:1527  
CgCctGcgagtctGGtatGACCGATAAATCTCTTTCTTATATTCAAGAGATATAAGAAAGAGATTTATCGGCTTTTTGGct  
cgagctggcgaattcc  
>CD\_NM\_003855.2:479  
CgCctGcgagtctGGtatGCTCATTGTATAAGAAGTGTAAATTTCAAGAGATTTACAGTTCTTATACAATGATTTTTTGGct  
cgagctggcgaattcc  
>CD\_NM\_003855.2:1454  
CgCctGcgagtctGGtatGCCCTGTTACTGACTTTCACATTTCAAGAGAGAATGTGAAGTCAAGTAAACAGGTTTTTGGct  
cgagctggcgaattcc  
>CD\_NM\_003855.2:1380  
CgCctGcgagtctGGtatGCGGTATGAACTTGAAGTGGACTTCAAGAGAGTCCACTTTCAAGTTCATACCTTTTTTGGct  
cgagctggcgaattcc  
>CD\_NM\_003855.2:578  
CgCctGcgagtctGGtatGAGTGCATTTCCCTTCATCATAATTTCAAGAGAATTTATGATGAAGGAAATGCACGTTTTTGGct  
cgagctggcgaattcc  
>CD\_NM\_003855.2:1058

CgCtGcgagtctGGtatGAACTGTGTGTCATTTATAGATTCAAGAGATCTATAAATGACACACACAGTCTTTTTGct  
cgagctggcgaattcc  
>CD\_NM\_003855.2:55  
CgCtGcgagtctGGtatGAGGTGCTTATATCTGTAAGCACTTCAAGAGAGTGTACAGATATAAGCACCTTTTTGct  
cgagctggcgaattcc  
>CD\_NM\_003855.2:1062  
CgCtGcgagtctGGtatGATGTGTGTCATTTATAGAGTTGTTCAAGAGACAACTCTATAAATGACACACACTTTTTGct  
cgagctggcgaattcc  
>CD\_NM\_003855.2:1533  
CgCtGcgagtctGGtatGCAATCTCTTTCTTATAACTCAATTCAAGAGATTGAGTTATAAGAAAGAGATTTTTTTGct  
cgagctggcgaattcc  
>CD\_NM\_003855.2:1039  
CgCtGcgagtctGGtatGCGGCAGTAGTGTGCCTAGTGACTTCAAGAGAGTCACTAGGCACACTACTGCCATTTTTGct  
cgagctggcgaattcc  
>CD\_NM\_003855.2:579  
CgCtGcgagtctGGtatGATGCATTTCTTCATCATAATGTTCAAGAGACATTATGATGAAGGAAATGCACTTTTGct  
cgagctggcgaattcc  
>CD\_NM\_003855.2:665  
CgCtGcgagtctGGtatGCCCCGGTCTTCTTGGACCAAAGTTCAAGAGACTTTGGTCCAAGAAGAACCGGATTTTTGct  
cgagctggcgaattcc  
>CD\_NM\_003855.2:1367  
CgCtGcgagtctGGtatGATCTAATGAGGTCAGGTATGAATTCAAGAGATTCATACCTGACCTCATTAGACTTTTTGct  
cgagctggcgaattcc  
>CD\_NM\_003855.2:731  
CgCtGcgagtctGGtatGATGCTCTGCTTTGCTGAATGAATTCAAGAGATTCATTCAGCAAAGCAGAGCAGTTTTGct  
cgagctggcgaattcc  
>CD\_NM\_003855.2:342  
CgCtGcgagtctGGtatGCGGAAATTAATGTCATCAGAATTCAAGAGATTCATGATGACATTTAATTTCCATTTTTGct  
cgagctggcgaattcc  
>CD\_NM\_003855.2:1220  
CgCtGcgagtctGGtatGCTTGCCAGGGTGTGGAGAAATTCAGAGATTTCTCCAACACCCTGGGCAAATTTTTGct  
cgagctggcgaattcc  
>CD\_NM\_003855.2:43  
CgCtGcgagtctGGtatGACTTGACCCTTTGGGTGCTTATTTCAAGAGAATAAGCACCCAAAGGGTCAAGTTTTGct  
cgagctggcgaattcc  
>CD\_NM\_003855.2:1052  
CgCtGcgagtctGGtatGACTAGTACTGTGTGTGTCATTTTTCAAGAGAAATGACACACACAGTCACTAGTTTTGct  
cgagctggcgaattcc  
>CD\_NM\_003853:1205  
CgCtGcgagtctGGtatGCGAACCATTGTGGGAGACACTATTCAAGAGATAGTGTCTCCACAATGGTTCTTTTTGct  
cgagctggcgaattcc  
>CD\_NM\_003853:1018  
CgCtGcgagtctGGtatGAAGCTGCCAAAGTGATGCACAATTCAAGAGATTGTGCATCACTTTGGCAGCTGTTTTGct  
cgagctggcgaattcc  
>CD\_NM\_003853:1325  
CgCtGcgagtctGGtatGCGGGTCTTTAACCCTGTCATAATTCAAGAGATTATGACAGGGTTAAAGACCCTTTTTGct  
cgagctggcgaattcc  
>CD\_NM\_003853:1434  
CgCtGcgagtctGGtatGCTGAGCGTAATATCATCTTGGATTCAAGAGATCCAAGATGATATTACGCTCAATTTTTGct  
cgagctggcgaattcc  
>CD\_NM\_003853:1946  
CgCtGcgagtctGGtatGAGACCCAGTATCTTTGAACTACTTCAAGAGAGTAGTTCAAAGATACTGGGTCTTTTTGct  
cgagctggcgaattcc  
>CD\_NM\_003853:894

CgCctGcgagtctGGtatGCAGCCTGTTGTGTCAAGATGATTTCAAGAGAATCATCTTGACACAACAGGCTATTTTTGct  
cgagctggcgaattcc  
>CD\_NM\_003853.2:1018  
CgCctGcgagtctGGtatGCGCTGCCAAAGTGATGCACAAATTTCAAGAGATTTGTGCATCACTTTGGCAGCTTTTTTgct  
cgagctggcgaattcc  
>CD\_NM\_003853.2:1753  
CgCctGcgagtctGGtatGACCACTTCATCTCTGAGTGAAGTTCAAGAGACTTCACTCAGAGATGAAGTGGCTTTTTTgct  
cgagctggcgaattcc  
>CD\_NM\_003853.2:1521  
CgCctGcgagtctGGtatGCACCCAGTCCGTCCAACCTGAAATTTCAAGAGATTTCACTTGGACGGACTGGGTTTTTTTTgct  
cgagctggcgaattcc  
>CD\_NM\_003853.2:1877  
CgCctGcgagtctGGtatGCAGACATTGTGAGCATTATTAATTTCAAGAGATTAATAATGCTCACAATGTCTTTTTTgct  
cgagctggcgaattcc  
>CD\_NM\_003853.2:1043  
CgCctGcgagtctGGtatGAAGCGGTAACCTGGTACAAGAATTTCAAGAGATTTCTGTACCAGGTTACCGCTGTTTTTgct  
cgagctggcgaattcc  
>CD\_NM\_003853.2:712  
CgCctGcgagtctGGtatGCACGACCTATCTGATGTCCAATTTCAAGAGAATTGGACATCAGATAGGTCGTTTTTTTTgct  
cgagctggcgaattcc  
>CD\_NM\_003853.2:1709  
CgCctGcgagtctGGtatGCTGCTTTCGTATCCTATGCAAATTTCAAGAGATTTGCATAGGATACGAAAGCATTTTTTgct  
cgagctggcgaattcc  
>CD\_NM\_003853.2:1786  
CgCctGcgagtctGGtatGATGAGCCTATTTCTGATGTTTTTCAAGAGAAAACATCAGGAAATAGGCTCAGTTTTTTgct  
cgagctggcgaattcc  
>CD\_NM\_003853.2:1625  
CgCctGcgagtctGGtatGCCTACAGGCACTGGATTGAAATTTCAAGAGAATTTCAATCCAGTGCCTGTAGATTTTTTgct  
cgagctggcgaattcc  
>CD\_NM\_003853.2:1948  
CgCctGcgagtctGGtatGACCAGTATCTTTGAACTACAAGTTCAAGAGACTTGTAGTTCAAAGATACTGGGTTTTTTgct  
cgagctggcgaattcc  
>CD\_NM\_003853.2:1030  
CgCctGcgagtctGGtatGAATGCACAAAGTCCAGCGGTAATTTCAAGAGATTACCGCTGGACTTTGTGCATCTTTTTTgct  
cgagctggcgaattcc  
>CD\_NM\_003853.2:717  
CgCctGcgagtctGGtatGACTATCTGATGTCCAATGGTACTTCAAGAGAGTACCATTGGACATCAGATAGGTTTTTTgct  
cgagctggcgaattcc  
>CD\_NM\_003853.2:1497  
CgCctGcgagtctGGtatGCGTCCAGAACTCCATTGGAACTTCAAGAGAGTTTCCAATGGAGTTCTGGACATTTTTTgct  
cgagctggcgaattcc  
>CD\_NM\_003853.2:2038  
CgCctGcgagtctGGtatGAAGCCAGAGTCTCTACCTCATCTTCAAGAGAGATGAGGTAGAGACTCTGGCTTTTTTTgct  
cgagctggcgaattcc  
>CD\_NM\_003853.2:485  
CgCctGcgagtctGGtatGCGCTCTGTTTGGGCTGGATATTTTTCAAGAGAAATATCCAGCCCAAACAGAGCATTTTTTgct  
cgagctggcgaattcc  
>CD\_NM\_003853.2:952  
CgCctGcgagtctGGtatGCATTCCGCATCACATAAGCAAGTTCAAGAGACTTGCTTATGTGATGCGGAATTTTTTgct  
cgagctggcgaattcc  
>CD\_NM\_003853.2:1831  
CgCctGcgagtctGGtatGATGTGTTTGCTTGAAAGAGATGTTCAAGAGACATCTTTTCAAGCAAACACAGTTTTTTgct  
cgagctggcgaattcc  
>CD\_NM\_003853.2:1325

CgCctGcgagtctGGtatGAGGTCTTTAACCCGTGCATAAATTCAAGAGATTTATGACAGGGTTAAAGACCCTTTTTGct  
cgagctggcgaattcc  
>CD\_NM\_003853.2:1166  
CgCctGcgagtctGGtatGATGTGAGTTCGTGGACAGTCAGTTCAAGAGACTGACTGTCCACGAACTCACAGTTTTTGct  
cgagctggcgaattcc  
>CD\_NM\_003853.2:2195  
CgCctGcgagtctGGtatGCGCTCAGAATTACCTCTAGGATTTCAAGAGAATCCTAGAGGTAATTCTGAGCTTTTTTGct  
cgagctggcgaattcc  
>CD\_NM\_003853.2:1944  
CgCctGcgagtctGGtatGCGGACCCAGTATCTTTGAACTATTCAAGAGATAGTTCAAAGATACTGGGTCCATTTTTGct  
cgagctggcgaattcc  
>CD\_NM\_003853.2:2252  
CgCctGcgagtctGGtatGATGGGAGGAGCTCCAGCCTAATTCAAGAGATTAGGCTGGGAGCTCCTCCAGTTTTTGct  
cgagctggcgaattcc  
>CD\_NM\_003853.2:1971  
CgCctGcgagtctGGtatGCGCAGTGAATCTTGCCTTGGATTTCAAGAGAATCCAAGGCAAGATTCAGTCTTTTTTGct  
cgagctggcgaattcc  
>CD\_NM\_003853.2:894  
CgCctGcgagtctGGtatGCGCCTGTTGTGTCAAGATGATTTTCAAGAGAAATCATCTTGACACAACAGGCTTTTTTGct  
cgagctggcgaattcc  
>CD\_NM\_003853.2:569  
CgCctGcgagtctGGtatGCACTCCTTTGGACATATTCTACTTCAAGAGAGTAGAATATGTCCAAAGGAGTTTTTTGct  
cgagctggcgaattcc  
>CD\_NM\_003853.2:1748  
CgCctGcgagtctGGtatGATGAGGCCACTTCATCTCTGAGTTCAAGAGACTCAGAGATGAAGTGGCTCACTTTTTGct  
cgagctggcgaattcc  
>CD\_NM\_003853.2:642  
CgCctGcgagtctGGtatGCTCACATTTCTGCCACAGAAATTTCAAGAGAATTTCTGTGGCAGAAATGTGATTTTTTGct  
cgagctggcgaattcc  
>CD\_NM\_000208:284  
CgCctGcgagtctGGtatGCTGCAGATACTCTTGATGTTCAATTCAAGAGATGAACATCAAGAGTATCTGCAATTTTTGct  
cgagctggcgaattcc  
>CD\_NM\_000208:3911  
CgCctGcgagtctGGtatGCTGCGCATGTGCTGGCAATTCATTCAAGAGATGAATTGCCAGCACATGCGCATTTTTTGct  
cgagctggcgaattcc  
>CD\_NM\_000208:3458  
CgCctGcgagtctGGtatGATGCGGCCAGAGGCTGAGAATATTCAAGAGATATTCTCAGCCTCTGGCCGAGTTTTTGct  
cgagctggcgaattcc  
>CD\_NM\_000208:3810  
CgCctGcgagtctGGtatGCGCCTTACCAAGGCCTGTCTAATTCAAGAGATTAGACAGGCCTTGGTAAGGCTTTTTTGct  
cgagctggcgaattcc  
>CD\_NM\_000208:1926  
CgCctGcgagtctGGtatGAGGCCAAGAGTGACATCATTATTCAAGAGATAAATGATGTCACTCTTGCCCTTTTTGct  
cgagctggcgaattcc  
>CD\_NM\_000208:1196  
CgCctGcgagtctGGtatGCACGGGAGTCTGATCATCAACATTCAAGAGATGTTGATGATCAGACTCCCGTTTTTTGct  
cgagctggcgaattcc  
>CD\_NM\_000208.1:284  
CgCctGcgagtctGGtatGCGCAGATACTCTTGATGTTCAATTCAAGAGATTGAACATCAAGAGTATCTGCATTTTTGct  
cgagctggcgaattcc  
>CD\_NM\_000208.1:2676  
CgCctGcgagtctGGtatGAACGCATGAAATCTTTGAGAACTTCAAGAGAGTTCTCAAAGATTTTCATGCGTCTTTTTGct  
cgagctggcgaattcc  
>CD\_NM\_000208.1:2230

CgCctGcgagtctGGtatGCGCTGCTCCTGTCCAAAGACAGTTCAAGAGACTGTCTTTGGACAGGAGCAGCATTTTTTGct  
cgagctggcgaattcc  
>CD\_NM\_000208.1:2247  
CgCctGcgagtctGGtatGAACAGACTCTCAGATCCTGAAGTTCAAGAGACTTCAGGATCTGAGAGTCTGTCTTTTTGct  
cgagctggcgaattcc  
>CD\_NM\_000208.1:2739  
CgCctGcgagtctGGtatGCGGTCTGATCGTGCTGTATGAATTC AAGAGATTCATACAGCACGATCAGACCATTTTTTGct  
cgagctggcgaattcc  
>CD\_NM\_000208.1:3103  
CgCctGcgagtctGGtatGATCAGTGCCAGTGATGTGTTTCTTCAAGAGAGAAACACATCACTGGCACTGAGTTTTTGct  
cgagctggcgaattcc  
>CD\_NM\_000208.1:1926  
CgCctGcgagtctGGtatGAGCCAAGAGTGACATCATTATTTCAAGAGAATAAATGATGTCACTCTTGGCCTTTTTGct  
cgagctggcgaattcc  
>CD\_NM\_000208.1:1317  
CgCctGcgagtctGGtatGATCACTTTCCTTCTTCCGGAAGTTCAAGAGACTTCCGGAAGAAGGAAAGTGACTTTTTGct  
cgagctggcgaattcc  
>CD\_NM\_000208.1:3460  
CgCctGcgagtctGGtatGAGGCCAGAGGCTGAGAATAATCTTCAAGAGAGATTATTCTCAGCCTCTGGCCGTTTTGct  
cgagctggcgaattcc  
>CD\_NM\_000208.1:3960  
CgCctGcgagtctGGtatGAATTGTCAACCTGCTCAAGGACTTCAAGAGAGTCCCTTGAGCAGGTTGACAATTTTTGct  
cgagctggcgaattcc  
>CD\_NM\_000208.1:960  
CgCctGcgagtctGGtatGATGCCAGGACCTGCACCACAAATTC AAGAGATTTGTGGTGCAGGCTCTGGCAGTTTTTGct  
cgagctggcgaattcc  
>CD\_NM\_000208.1:357  
CgCctGcgagtctGGtatGAACTGATTACTTGCTGCTCTTCTTCAAGAGAGAAGAGCAGCAAGTAATCAGTGTTTTTGct  
cgagctggcgaattcc  
>CD\_NM\_000208.1:1938  
CgCctGcgagtctGGtatGAATCATTTATGTCCAGACAGATTTCAAGAGAATCTGTCTGGACATAAATGATGTTTTTGct  
cgagctggcgaattcc  
>CD\_NM\_000208.1:594  
CgCctGcgagtctGGtatGACTGGATTCCGTGGAGGATAATTTCAAGAGAATTATCCTCCACGGAATCCAGGTTTTTGct  
cgagctggcgaattcc  
>CD\_NM\_000208.1:1224  
CgCctGcgagtctGGtatGCGGCAACAATCTGGCAGCTGAGTTCAAGAGACTCAGCTGCCAGATTGTTGCCTTTTTTGct  
cgagctggcgaattcc  
>CD\_NM\_000208.1:1863  
CgCctGcgagtctGGtatGAACCCAGTATGCCATCTTTGTGTTCAAGAGACACAAAGATGGCATACTGGGTCTTTTTGct  
cgagctggcgaattcc  
>CD\_NM\_000208.1:3498  
CgCctGcgagtctGGtatGCACCCTTCAAGAGATGATTCAGTTCAAGAGACTGAATCATCTCTTGAAGGGTATTTTTGct  
cgagctggcgaattcc  
>CD\_NM\_000208.1:3536  
CgCctGcgagtctGGtatGATGACGGGATGGCCTACCTGAATTC AAGAGATTCAGGTAGGCCATCCCGTCAGTTTTTGct  
cgagctggcgaattcc  
>CD\_NM\_000208.1:2002  
CgCctGcgagtctGGtatGCACTCATCATCCAGATTATTCTTCAAGAGAGAATAATCTGGGATGATGAGTTTTTTGct  
cgagctggcgaattcc  
>CD\_NM\_000208.1:203  
CgCctGcgagtctGGtatGCGGTGTGTCCCGCATGGATATTTCAAGAGAATATCCATGCCGGGACACACCTTTTTTGct  
cgagctggcgaattcc  
>CD\_NM\_000208.1:1194

CgCctGcgagtctGGtatGAAACGGGAGTCTGATCATCAACTTCAAGAGAGTTGATGATCAGACTCCCGTTGTTTTTGct  
cgagctggcgaattcc  
>CD\_NM\_000208.1:4044  
CgCctGcgagtctGGtatGAAGTGAGGAGCTGGAGATGGAGTTCAAGAGACTCCATCTCCAGCTCCTCACTCTTTTTTGct  
cgagctggcgaattcc  
>CD\_NM\_000208.1:3799  
CgCctGcgagtctGGtatGCTGGCAGAACAGCCTTACCAAGTTCAAGAGACTTGGTAAGGCTGTTCTGCCAATTTTTTGct  
cgagctggcgaattcc  
>CD\_NM\_000208.1:256  
CgCctGcgagtctGGtatGAAGAATTGCTCTGTCTATCGAAGTTCAAGAGACTTCGATGACAGAGCAATTCTCTTTTTTGct  
cgagctggcgaattcc  
>CD\_NM\_000208.1:1380  
CgCctGcgagtctGGtatGATCCTTCTATGCCCTTGGACAACCTTCAAGAGAGTTGTCCAAGGCATAGAAGGAGTTTTTGct  
cgagctggcgaattcc  
>CD\_NM\_000208.1:3810  
CgCctGcgagtctGGtatGACCTTACCAAGGCCGTGCTAATTTCAAGAGAATTAGACAGGCCCTTGGTAAGCCTTTTTTGct  
cgagctggcgaattcc  
>CD\_NM\_000208.1:4234  
CgCctGcgagtctGGtatGACTCGGTCCAATCCTTCCCTAATTTCAAGAGAGTTAGGAAGGATTGGACCGAGTTTTTGct  
cgagctggcgaattcc  
>CD\_NM\_000875:1231  
CgCctGcgagtctGGtatGCTGGTCTCCTTGTCTTCCCTAATTTCAAGAGATTAGGAAGGACAAGGAGACCAATTTTTTGct  
cgagctggcgaattcc  
>CD\_NM\_000875:1398  
CgCctGcgagtctGGtatGCCCCAAATTATGTGTTTTCCGAATTTCAAGAGATTCGGAAACACATAATTTGGGATTTTTTGct  
cgagctggcgaattcc  
>CD\_NM\_000875:1905  
CgCctGcgagtctGGtatGCTCGAACTCCTCTTCTCAGTTATTCAAGAGATAACTGAGAAGAGGAGTTCGATTTTTTGct  
cgagctggcgaattcc  
>CD\_NM\_000875:2398  
CgCctGcgagtctGGtatGCAGGAGAGAACTGTCATTTCTATTCAAGAGATAGAAATGACAGTTCTCTCTTTTTTGct  
cgagctggcgaattcc  
>CD\_NM\_000875:3473  
CgCctGcgagtctGGtatGCAGCCGAAGATTTACAGTCAATTTCAAGAGATTGACTGTGAAATCTTCGGCTATTTTTTGct  
cgagctggcgaattcc  
>CD\_NM\_000875:3778  
CgCctGcgagtctGGtatGCTGCGCATGTGCTGGCAGTATATTCAAGAGATATACTGCCAGCACATGCGCATTTTTTGct  
cgagctggcgaattcc  
>CD\_NM\_000875:1029  
CgCctGcgagtctGGtatGACCGAAGGTCTGTGAGGAAGAATTCAAGAGATTCCTCCTCACAGACCTTCGGGTTTTTGct  
cgagctggcgaattcc  
>CD\_NM\_000875.2:1398  
CgCctGcgagtctGGtatGACCAAATTATGTGTTTTCCGAATTTCAAGAGATTTCCGAAACACATAATTTGGGTTTTTGct  
cgagctggcgaattcc  
>CD\_NM\_000875.2:1492  
CgCctGcgagtctGGtatGAGGAGAGAGCCTCCTGTGAAAGTTCAAGAGACTTTCACAGGAGGCTCTCTCCCTTTTTTGct  
cgagctggcgaattcc  
>CD\_NM\_000875.2:1231  
CgCctGcgagtctGGtatGCGGTCTCCTTGTCTTCCCTAATTTCAAGAGATTTAGGAAGGACAAGGAGACCATTTTTTGct  
cgagctggcgaattcc  
>CD\_NM\_000875.2:2792  
CgCctGcgagtctGGtatGAACAGATCCTGTGTTCTTCTATTTCCTAAGAGAATAGAAGAACACAGGATCTGTCTTTTTTGct  
cgagctggcgaattcc  
>CD\_NM\_000875.2:2207

CgCtGcgagtctGGtatGATTTGAGAATTTCTGCACAACCTCAAGAGAGTTGTGCAGGAAATTTCTCAAAGTTTTTGct  
cgagctggcgaattcc  
>CD\_NM\_000875.2:3218  
CgCtGcgagtctGGtatGCTGTCACCATGTGGTGGCATTGTTCAAGAGACAATCGCACCACATGGTGACAATTTTTTGct  
cgagctggcgaattcc  
>CD\_NM\_000875.2:2670  
CgCtGcgagtctGGtatGAAGCGAGAATGTGTGTCCAGACTTCAAGAGAGTCTGGACACACATTCTCGCTGTTTTTGct  
cgagctggcgaattcc  
>CD\_NM\_000875.2:2606  
CgCtGcgagtctGGtatGCCCTGAGAATCCCAATGGATTGTTCAAGAGACAATCCATTGGGATTCTCAGGTTTTTTGct  
cgagctggcgaattcc  
>CD\_NM\_000875.2:1637  
CgCtGcgagtctGGtatGATTTAAGAAATGTCACAGAGTATTTCAAGAGAATACTCTGTGACATTCTTAAAGTTTTTGct  
cgagctggcgaattcc  
>CD\_NM\_000875.2:2367  
CgCtGcgagtctGGtatGCACCCTTTCTTTGAGAGCAGAGTTCAAGAGACTCTGCTCTCAAAGAAAGGGTATTTTTGct  
cgagctggcgaattcc  
>CD\_NM\_000875.2:1298  
CgCtGcgagtctGGtatGATCCTTCTACGTCCTCGACAACCTCAAGAGAGTTGTGCAGGACGTAGAAGAGTTTTTGct  
cgagctggcgaattcc  
>CD\_NM\_000875.2:1796  
CgCtGcgagtctGGtatGAACCCTCACCATGGTGGAGAACCTCAAGAGAGTTCTCCACCATGGTGAGGGTCTTTTTGct  
cgagctggcgaattcc  
>CD\_NM\_000875.2:3095  
CgCtGcgagtctGGtatGCGCCAAGGGTGTGGTGAAGATTTCAAGAGAATCTTTCACCACACCCTTGGCATTTTTGct  
cgagctggcgaattcc  
>CD\_NM\_000875.2:2864  
CgCtGcgagtctGGtatGACCCGTGCTGTCCTGTTGATCTTCAAGAGAGATCAACAGGACAGCGACGGGCTTTTTGct  
cgagctggcgaattcc  
>CD\_NM\_000875.2:3528  
CgCtGcgagtctGGtatGAAGACAGACTATTACCGGAAAGTTCAAGAGACTTCCGGTAATAGTCTGTCTTTTTGct  
cgagctggcgaattcc  
>CD\_NM\_000875.2:1905  
CgCtGcgagtctGGtatGCCGAACCTCTTCTCAGTTAATTTCAAGAGATTAACCTGAGAAGAGGAGTTCGATTTTTGct  
cgagctggcgaattcc  
>CD\_NM\_000875.2:3994  
CgCtGcgagtctGGtatGACGACAGACTCAGGACACAATTTCAAGAGATTGTGTCTGAGTGTCTGTCGGTTTTTGct  
cgagctggcgaattcc  
>CD\_NM\_000875.2:3403  
CgCtGcgagtctGGtatGAAGACGGCATGGCATACTCAATTTCAAGAGATTGAGGTATGCCATGCCGTCTGTTTTTGct  
cgagctggcgaattcc  
>CD\_NM\_000875.2:1062  
CgCtGcgagtctGGtatGCCATTGATTCTGTTACTTCTGTTCAAGAGACAGAAGTAACAGAATCAATGGTTTTTTGct  
cgagctggcgaattcc  
>CD\_NM\_000875.2:3752  
CgCtGcgagtctGGtatGATGTCTGACATGCTGTTTGAATTTCAAGAGATTCAAACAGCATGTCAGGACAGTTTTTGct  
cgagctggcgaattcc  
>CD\_NM\_000875.2:2081  
CgCtGcgagtctGGtatGAATTGAGGAGTTCACAGAGAACCTCAAGAGAGTTCTCTGTGACCTCTCAATGTTTTTGct  
cgagctggcgaattcc  
>CD\_NM\_000875.2:287  
CgCtGcgagtctGGtatGCACCGAGTACTTGTGCTGTTCTTCAAGAGAGAACAGCAGCAAGTACTCGGTATTTTTGct  
cgagctggcgaattcc  
>CD\_NM\_000875.2:2358

CgCtGcgagtctGGtatGAAGACAGAGTACCCTTTCTTTGTTCAAGAGACAAAGAAAGGGTACTCTGTCTCTTTTTGct  
cgagctggcgaattcc  
>CD\_NM\_000875.2:3757  
CgCtGcgagtctGGtatGATGACATGCTGTTTGAAGTATTCAAGAGAATCAGTTCAAACAGCATGTCAGTTTTTgct  
cgagctggcgaattcc  
>CD\_NM\_000875.2:2804  
CgCtGcgagtctGGtatGATTCTTCTATGTCAGGCCAAATTCAGAGATTTGGCCTGGACATAGAAGAACTTTTTGct  
cgagctggcgaattcc  
>CD\_NM\_000875.2:1775  
CgCtGcgagtctGGtatGAGCCGTTTACGTCAAGGCTGTGTTCAAGAGACACAGCCTTGACGTAAACGGCGTTTTTgct  
cgagctggcgaattcc  
>CD\_NM\_000876:1065  
CgCtGcgagtctGGtatGACGCTATGAAATTGAGTGGATTTTCAAGAGAAATCCACTCAATTTTCATAGCGTTTTTgct  
cgagctggcgaattcc  
>CD\_NM\_000876:2280  
CgCtGcgagtctGGtatGAGGCACACCCTATAACAATGAATTCAAGAGATTCATTGTTATAGGGTGTGCCGTTTTTgct  
cgagctggcgaattcc  
>CD\_NM\_000876:2351  
CgCtGcgagtctGGtatGAGGGAGTGGCTTCCCTGAATATTCAAGAGATATTCAGGGAAGCCACTCCGTTTTTgct  
cgagctggcgaattcc  
>CD\_NM\_000876:3705  
CgCtGcgagtctGGtatGAACGTTTGAGTGTGCTCAGATATTCAAGAGATATCTGAGCACACTCAAACGTTTTTTgct  
cgagctggcgaattcc  
>CD\_NM\_000876:5425  
CgCtGcgagtctGGtatGCCGCTCATCGCGTTTCACTGTATTCAAGAGATACAGTGAAACGCGATGAGCGATTTTTTgct  
cgagctggcgaattcc  
>CD\_NM\_000876:5104  
CgCtGcgagtctGGtatGCCCGTGAGGAATGGAAGCTCTATTCAAGAGATAGAGCTTCCATTCCCTCACGGATTTTTTgct  
cgagctggcgaattcc  
>CD\_NM\_000876:1751  
CgCtGcgagtctGGtatGAGGCAGTGTGTGCAGTGGATAATTCAAGAGATTATCCACTGCACACACTGCCGTTTTTgct  
cgagctggcgaattcc  
>CD\_NM\_000876:1750  
CgCtGcgagtctGGtatGACGGCAGTGTGTGCAGTGGATATTCAAGAGATATCCACTGCACACACTGCCGTTTTTgct  
cgagctggcgaattcc  
>CD\_NM\_000876.1:1103  
CgCtGcgagtctGGtatGAAGAGATTACCTGGAAGTAAATTCAGAGATTTACTTTCCAGGTAATCTCTGTTTTTgct  
cgagctggcgaattcc  
>CD\_NM\_000876.1:4242  
CgCtGcgagtctGGtatGATGACTGAATGTTTCAATCAAAGTTCAAGAGACTTTGAATGAACATTCAGTCAGTTTTTgct  
cgagctggcgaattcc  
>CD\_NM\_000876.1:3705  
CgCtGcgagtctGGtatGCCGTTTGAAGTGTGCTCAGATATTTCAAGAGAATATCTGAGCACACTCAAACGTTTTTTgct  
cgagctggcgaattcc  
>CD\_NM\_000876.1:1988  
CgCtGcgagtctGGtatGCGCGGCTGTGTGCTGTCTAAGTTCAAGAGACTTAGACAGCACACAGGCCGATTTTTTgct  
cgagctggcgaattcc  
>CD\_NM\_000876.1:7139  
CgCtGcgagtctGGtatGAAGGGAAACAGTGATAAGTAAGTTCAAGAGACTTACTTATCACTGTTTCCCTTTTTTgct  
cgagctggcgaattcc  
>CD\_NM\_000876.1:7244  
CgCtGcgagtctGGtatGCACAGAGTGGCTGATGGAAGAGTTCAAGAGACTTTCATCAGCCACTCTGTTTTTTTTgct  
cgagctggcgaattcc  
>CD\_NM\_000876.1:3342



CgCctGcgagtctGGtatGCACACTTACTTTGAGTTTGAATTTCAAGAGATTTCAAACCTCAAAGTAAGTGTTTTTTTGct  
cgagctggcgaattcc  
>CD\_NM\_000876.1:896  
CgCctGcgagtctGGtatGAGGACTGAAGCTGGTGC GCAAGTTCAAGAGACTTGCGCACCAGCTTCAGTCCGTTTTTTGct  
cgagctggcgaattcc  
>CD\_NM\_000876.1:662  
CgCctGcgagtctGGtatGACCATGCTATGTGTTTGATGAATTTCAAGAGATTCATCAAACACATAGCATGGCTTTTTTGct  
cgagctggcgaattcc  
>CD\_NM\_000876.1:6060  
CgCctGcgagtctGGtatGATGCGTGGGTGTGATGTGACATTTCAAGAGAATGTCACATCACACCCACGCACTTTTTTGct  
cgagctggcgaattcc  
>CD\_NM\_000876.1:5993  
CgCctGcgagtctGGtatGAACATCCAGCATCATATTTAAGTTCAAGAGACTTAAATATGATGCTGGATGTCTTTTTTGct  
cgagctggcgaattcc  
>CD\_NM\_000876.1:5050  
CgCctGcgagtctGGtatGATCTCTTCTTCTCCTGGCACACTTTCAAGAGAGTGTGCCAGGAGAAGAAGAGAGTTTTTTGct  
cgagctggcgaattcc  
>CD\_NM\_000876.1:2867  
CgCctGcgagtctGGtatGATGGGAGTGTGTGGTCAGTTTCTTCAAGAGAGAACTGACCACACACTCCCAGTTTTTTGct  
cgagctggcgaattcc  
>CD\_NM\_000876.1:626  
CgCctGcgagtctGGtatGATGCAAGAAAGACATATTTAAATTTCAAGAGATTTAAATATGTCTTTCTTGCAGTTTTTTGct  
cgagctggcgaattcc  
>CD\_NM\_000876.1:6817  
CgCctGcgagtctGGtatGCCGTGTTTGCCCTTTCCTCTAATTTCAAGAGATTAGAGGAAGAGGCAAACACGATTTTTTTGct  
cgagctggcgaattcc  
>CD\_NM\_000876.1:1252  
CgCctGcgagtctGGtatGATGAAATACAGTTCTGTAATAATTTCAAGAGATTATTACAGAACTGTATTTCAAGTTTTTTGct  
cgagctggcgaattcc  
>CD\_NM\_000876.1:4240  
CgCctGcgagtctGGtatGCTCTGACTGAATGTTTCATTTCAATTTCAAGAGATTGAATGAACATTCAGTCAGATTTTTTTGct  
cgagctggcgaattcc  
>CD\_NM\_000876.1:1700  
CgCctGcgagtctGGtatGCTGTACAGAGTGTGCAGGAATTTCAAGAGATTCCTGCAGCACTCTGTGACAATTTTTTTGct  
cgagctggcgaattcc  
>CD\_NM\_000876.1:1034  
CgCctGcgagtctGGtatGAATTTCCAAACTCACAGCTAAATTTCAAGAGATTTAGCTGTGAGTTTGGGAATTTTTTTGct  
cgagctggcgaattcc  
>CD\_NM\_000876.1:2090  
CgCctGcgagtctGGtatGCGCCTATAAAGTTGAGACAAAGTTCAAGAGACTTTGTCTCAACTTTATAGGCATTTTTTTGct  
cgagctggcgaattcc  
>CD\_NM\_000876.1:3108  
CgCctGcgagtctGGtatGAAGGCAGAAACCCAAACTGAAGTTCAAGAGACTTCAGTTTGGGTTTCTGCCTTTTTTTGct  
cgagctggcgaattcc  
>CD\_NM\_000876.1:6887  
CgCctGcgagtctGGtatGATGTGACCCCTCTGGTGGAGGACTTTCAAGAGAGTCCACCAGAGGGTCACAGTTTTTTGct  
cgagctggcgaattcc  
>CD\_NM\_000876.1:2968  
CgCctGcgagtctGGtatGATGGATTTGTGTTTAATCTTAATTTCAAGAGATTAAGATTAACACAAATCCACTTTTTTTGct  
cgagctggcgaattcc  
>CD\_NM\_000876.1:2876  
CgCctGcgagtctGGtatGCGTGGTCAGTTTCTGTGGAACCTTCAAGAGAGTTCACAGGAACTGACCACATTTTTTTGct  
cgagctggcgaattcc  
>CD\_NM\_000876.1:6202

CgCctGcgagtctGGtatGCCAACGGAGTCTCGTACTATATTTCAAGAGAATATAGTACGAGACTCCGTTGTTTTTTGct  
cgagctggcgaattcc  
>CD\_NM\_002286:1217  
CgCctGcgagtctGGtatGCCCCGGTCTTTCCTCACTGCCATTCAAGAGATGGCAGTGAGGAAAGACCGGGTTTTTTGct  
cgagctggcgaattcc  
>CD\_NM\_002286:1265  
CgCctGcgagtctGGtatGAACCTCCTGGTACTGGAGACATTCAAGAGATGTCTCCAGTCACCAGGAGGTCTTTTTGct  
cgagctggcgaattcc  
>CD\_NM\_002286:1287  
CgCctGcgagtctGGtatGCTGGCGACTTTACCCTTCGACTTTCAAGAGAAGTCGAAGGGTAAAGTCGCCATTTTTTTGct  
cgagctggcgaattcc  
>CD\_NM\_002286:1545  
CgCctGcgagtctGGtatGCGGCACAGGAGGCCAGCTCCTTTCAAGAGAAGGAGCTGGGCCTCCTGTGCCTTTTTTGct  
cgagctggcgaattcc  
>CD\_NM\_002286:1716  
CgCctGcgagtctGGtatGCTGGTGTCTTTCTCTGCTCCTTTCAAGAGAAGGAGCAGAGAAAGGACACCAATTTTTGct  
cgagctggcgaattcc  
>CD\_NM\_002286:1746  
CgCctGcgagtctGGtatGATGGAGCCTTTGGCTTTCACCTTTCAAGAGAAGGTGAAAGCCAAAGGCTCCAGTTTTTTGct  
cgagctggcgaattcc  
>CD\_NM\_002286.4:1462  
CgCctGcgagtctGGtatGCCTCCAGTATCTGGACAAGAACTTCAAGAGAGTTCTTGTCCAGATACTGGAGTTTTTTGct  
cgagctggcgaattcc  
>CD\_NM\_002286.4:1376  
CgCctGcgagtctGGtatGCTGCCACTGTCACATTGGCAATTTCAAGAGAATTGCCAATGTGACAGTGGCATTTTTTGct  
cgagctggcgaattcc  
>CD\_NM\_002286.4:1710  
CgCctGcgagtctGGtatGAACCTTGGTGTCTTTCTCTGTTCAAGAGACAGAGAAAGGACACCAAGGGTGTTTTTGct  
cgagctggcgaattcc  
>CD\_NM\_002286.4:936  
CgCctGcgagtctGGtatGACCAGCCTCTGTGCATTGGTTCTTCAAGAGAGAACCAATGCACAGAGGCTGGGTTTTTTGct  
cgagctggcgaattcc  
>CD\_NM\_002286.4:1382  
CgCctGcgagtctGGtatGATGTCACATTGGCAATCATCACTTCAAGAGAGTGATGATTGCCAATGTGACAGTTTTTTGct  
cgagctggcgaattcc  
>CD\_NM\_002286.4:942  
CgCctGcgagtctGGtatGATCTGTGCATTGGTTCGGAACCTTCAAGAGAGTTCGGAACCAATGCACAGAGTTTTTTGct  
cgagctggcgaattcc  
>CD\_NM\_002286.4:1401  
CgCctGcgagtctGGtatGAACAGTACTCCCAAATCCTTTTTCAAGAGAAAAGGATTTGGGAGTCACTGTGTTTTTTGct  
cgagctggcgaattcc  
>CD\_NM\_002286.4:1842  
CgCctGcgagtctGGtatGAATAGAGGAGCTGGAGCAAGAATTCAAGAGATTCTTGCTCCAGCTCCTCTATCTTTTTGct  
cgagctggcgaattcc  
>CD\_NM\_002286.4:1686  
CgCctGcgagtctGGtatGCGCAGGCCACCTCCTGCTGTTTTTTCAAGAGAAAACAGCAGGAGGTGGCCTGCTTTTTTTGct  
cgagctggcgaattcc  
>CD\_NM\_002286.4:1530  
CgCctGcgagtctGGtatGCGGACCTTGGCTGGAGGCACAGTTCAAGAGACTGTGCCTCCAGCCAAGGTCCTTTTTTTGct  
cgagctggcgaattcc  
>CD\_NM\_002286.4:1095  
CgCctGcgagtctGGtatGAAACGTCTCCATCATGTATAACTTCAAGAGAGTTATACATGATGGAGACGTTGTTTTTTGct  
cgagctggcgaattcc  
>CD\_NM\_002286.4:359

CgCctGcgagtctGGtatGATCAGTTCCTGGGCTTGCTGTTTTCAAGAGAAACAGCAAGCCCAGGAACTGAGTTTTTGct  
cgagctggcgaattcc  
>CD\_NM\_002286.4:1150  
CgCctGcgagtctGGtatGCTGACAGTGTACGCTGGAGCAGTTCAAGAGACTGCTCCAGCGTACACTGTCAATTTTTTGct  
cgagctggcgaattcc  
>CD\_NM\_002286.4:1487  
CgCctGcgagtctGGtatGCTGTGTGGAGCTCTCTGGACACTTCAAGAGAGTGTCCAGAGAGCTCCACACAATTTTTTGct  
cgagctggcgaattcc  
>CD\_NM\_002286.4:1830  
CgCctGcgagtctGGtatGAGCTCAGAGCAAGATAGAGGAGTTCAAGAGACTCCTCTATCTTGCTCTGAGCCTTTTTTGct  
cgagctggcgaattcc  
>CD\_NM\_002286.4:1100  
CgCctGcgagtctGGtatGCCTCCATCATGTATAACCTCACTTCAAGAGAGTGAGGTTATACATGATGGAGATTTTTTGct  
cgagctggcgaattcc  
>CD\_NM\_002286.4:1380  
CgCctGcgagtctGGtatGAACTGTACATTTGGCAATCATCTTCAAGAGAGATGATTGCCAATGTGACAGTTTTTTGct  
cgagctggcgaattcc  
>CD\_NM\_002286.4:1689  
CgCctGcgagtctGGtatGCGGCCACCTCCTGCTGTTTTCTTCAAGAGAGAGAAACAGCAGGAGGTGGCCTTTTTTGct  
cgagctggcgaattcc  
>CD\_NM\_002286.4:1341  
CgCctGcgagtctGGtatGAACCTGCCATATCCATCTGCAGTTCAAGAGACTGCAGATGGATATGGCAGGTTTTTTGct  
cgagctggcgaattcc  
>CD\_NM\_002286.4:1754  
CgCctGcgagtctGGtatGCTGGCTTTCACCTTTGGAGAAGTTCAAGAGACTTCTCCAAAGGTGAAAGCCAATTTTTTGct  
cgagctggcgaattcc  
>CD\_NM\_002286.4:495  
CgCctGcgagtctGGtatGACTCCAGGATCTCAGCCTTCTGTTCAAGAGACAGAAGGCTGAGATCCTGGAGTTTTTGct  
cgagctggcgaattcc  
>CD\_NM\_002286.4:1395  
CgCctGcgagtctGGtatGCATCATCACAGTGACTCCCAAATTCAGAGATTTGGGAGTCACTGTGATGATTTTTTGct  
cgagctggcgaattcc  
>CD\_NM\_002286.4:1617  
CgCctGcgagtctGGtatGCGCAGTGTACTTCACAGAGCTGTTCAAGAGACAGCTCTGTGAAGTACACTGCTTTTTTGct  
cgagctggcgaattcc  
>CD\_NM\_002286.4:1691  
CgCctGcgagtctGGtatGACCACCTCCTGCTGTTTCTCACTTCAAGAGAGTGTGAAACAGCAGGAGGTGGCTTTTTTGct  
cgagctggcgaattcc  
>CD\_NM\_002286.4:1748  
CgCctGcgagtctGGtatGAAGCCTTTGGCTTTCACCTTTGTTCAAGAGACAAAGGTGAAAGCCAAAGGCTTTTTTGct  
cgagctggcgaattcc  
>CD\_NM\_002286.4:1566  
CgCctGcgagtctGGtatGCTCCCAGCCTTGGCAATGCCAGTTCAAGAGACTGGCATTGCCAAGGCTGGGAATTTTTTGct  
cgagctggcgaattcc  
>CD\_NM\_002286.4:1140  
CgCctGcgagtctGGtatGACCAACTCCCTTGACAGTGTACTTCAAGAGAGTACACTGTCAAGGGAGTTGGGTTTTTGct  
cgagctggcgaattcc  
>CD\_NM\_005265:1776  
CgCctGcgagtctGGtatGAGGGATCCTGTTCAATAATGAATTCAGAGATTCATTATTGAACAGGATCCCGTTTTTGct  
cgagctggcgaattcc  
>CD\_NM\_005265:2137  
CgCctGcgagtctGGtatGCCCCAGATCGCGTCCACCTTCATTCAAGAGATGAAGGTGGACGCGATCTGGGTTTTTGct  
cgagctggcgaattcc  
>CD\_NM\_005265:875

CgCctGcgagtctGGtatGCGGCCTTTGCCACCATGTTCAATTCAAGAGATTGAACATGGTGGCAAAGGCCATTTTTTGct  
cgagctggcgaattcc  
>CD\_NM\_005265:799  
CgCctGcgagtctGGtatGAGCCTCTTCCTCACCATCTACATTCAAGAGATGTAGATGGTGGGAAGAGGCCTTTTTTGct  
cgagctggcgaattcc  
>CD\_NM\_005265:1974  
CgCctGcgagtctGGtatGAGCCACTGCACTGGCCATCATCTTCAAGAGAGATGATGGCCAGTGCAGTGGCCTTTTTTGct  
cgagctggcgaattcc  
>CD\_XM\_210798:571  
CgCctGcgagtctGGtatGACCGTGGTCTTGGTGTGGTCATTCAAGAGATGACCAGCACCAGGACCACGGCCTTTTTTGct  
cgagctggcgaattcc  
>CD\_XM\_210798:1099  
CgCctGcgagtctGGtatGAAGCCTGTCTTGTGTGAGGTGTTTCAAGAGAACACCTCACACAAGACAGGCTGTTTTTGct  
cgagctggcgaattcc  
>CD\_XM\_210798:1204  
CgCctGcgagtctGGtatGAAGGGTGCCAGGCCTTCTACATTCAAGAGATGTAGAAGGCCTGGGCACCCTTTTTTGct  
cgagctggcgaattcc  
>CD\_NM\_005265:1165  
CgCctGcgagtctGGtatGATGCCGAGCTGGCTGACACCTTTCAAGAGAAGGTGTCAGCCAGCTGCGGCAGTTTTTGct  
cgagctggcgaattcc  
>CD\_NM\_005265.2:1624  
CgCctGcgagtctGGtatGATCACCCGATCTCCTACTACAATTCAAGAGATTGTAGTAGGAGATCGGGTGGTTTTTGct  
cgagctggcgaattcc  
>CD\_NM\_005265.2:1283  
CgCctGcgagtctGGtatGCGCTGAGGACCTGAACAACACTTCAAGAGAGTAGTTGTTTCAGGTCTCAGCTTTTTTGct  
cgagctggcgaattcc  
>CD\_NM\_005265.2:1238  
CgCctGcgagtctGGtatGAGCCCAGATTGTGAAGGACATCTTCAAGAGAGATGTCCTTACAATCTGGGCCTTTTTTGct  
cgagctggcgaattcc  
>CD\_NM\_005265.2:1979  
CgCctGcgagtctGGtatGCGCACTGGCCATCATCTACAACCTTCAAGAGAGTTGTAGATGATGGCCAGTGCATTTTTTGct  
cgagctggcgaattcc  
>CD\_NM\_005265.2:2137  
CgCctGcgagtctGGtatGACCAGATCGCGTCCACCTTCATTTCAAGAGAATGAAGGTGGACGCGATCTGGTTTTTGct  
cgagctggcgaattcc  
>CD\_NM\_005265.2:1304  
CgCctGcgagtctGGtatGACGTGCTGAGCTGATCGAGCACTTCAAGAGAGTGCTCGATCAGCTCAGCACGGTTTTTGct  
cgagctggcgaattcc  
>CD\_NM\_005265.2:2053  
CgCctGcgagtctGGtatGCCAGCTTCTGCCAACGTCACCTTCAAGAGAGTGACGTTGGGCAGAAGCTGGTTTTTGct  
cgagctggcgaattcc  
>CD\_NM\_005265.2:1111  
CgCctGcgagtctGGtatGATGAGGTGTTCTGCCGGGATAGTTCAAGAGACTATCCCGGCAGAACACCTCACTTTTTTGct  
cgagctggcgaattcc  
>CD\_NM\_005265.2:1388  
CgCctGcgagtctGGtatGAGTGTGGCCCTCATCTCAACTTCAAGAGAGTTGAGGATGAGGGCCAGCACGTTTTTGct  
cgagctggcgaattcc  
>CD\_NM\_005265.2:805  
CgCctGcgagtctGGtatGCCCTCACCATCTACAACAGCACTTCAAGAGAGTGCTGTTGTAGATGGTGGAGTTTTTGct  
cgagctggcgaattcc  
>CD\_NM\_005265.2:950  
CgCctGcgagtctGGtatGACGAGGCTATGAGCTGGCACACTTCAAGAGAGTGTCAGCTCATAGCCTCGTTTTTGct  
cgagctggcgaattcc  
>CD\_NM\_005265.2:797

CgCctGcgagtctGGtatGCGGCCTCTTCCTCACCATCTACTTCAAGAGAGTAGATGGTGAGGAAGAGGCCATTTTTGct  
cgagctggcgaattcc  
>CD\_NM\_005265.2:1280  
CgCctGcgagtctGGtatGAACAGCTGAGGACCTGAACAACCTCAAGAGAGTTGTTTCAGGTCTCAGCTGTCTTTTTGct  
cgagctggcgaattcc  
>CD\_NM\_005265.2:1403  
CgCctGcgagtctGGtatGACTCAACATCCTCAAAGGGTACTTCAAGAGAGTACCCTTTGAGGATGTTGAGGTTTTTGct  
cgagctggcgaattcc  
>CD\_NM\_005265.2:799  
CgCctGcgagtctGGtatGACCTCTTCCTCACCATCTACAATTCAAGAGATTGTAGATGGTGAGGAAGAGGCTTTTTGct  
cgagctggcgaattcc  
>CD\_NM\_005265.2:1343  
CgCctGcgagtctGGtatGAGGAGACGTGGTGCTGTACATGTTCAAGAGACATGTACAGCACCACGTCTCCCTTTTTGct  
cgagctggcgaattcc  
>CD\_NM\_005265.2:1552  
CgCctGcgagtctGGtatGATGAGGTGGTCCGCAACATGACTTCAAGAGAGTCATGTTGCGGACCACCTCAGTTTTTGct  
cgagctggcgaattcc  
>CD\_NM\_005265.2:1876  
CgCctGcgagtctGGtatGCGCAGCCGCTCTCGTCCATGTGTTCAAGAGACACATGGACGAGAGCGGCTGTTTTTGct  
cgagctggcgaattcc  
>CD\_NM\_005265.2:673  
CgCctGcgagtctGGtatGCTGCCAAGCAGTGCTCGAAGATTTCAAGAGAATCTTCGAGCACTGCTTGGCATTTTTTGct  
cgagctggcgaattcc  
>CD\_NM\_005265.2:2069  
CgCctGcgagtctGGtatGAGTCACGACAGTGGAGAGAACTTCAAGAGAGTTTCTCTCCACTGTCGTGACGTTTTTGct  
cgagctggcgaattcc  
>CD\_NM\_005265.2:880  
CgCctGcgagtctGGtatGCTGCCACCATGTTCAACAGCTCTTCAAGAGAGAGCTGTTGAACATGGTGGCAATTTTTGct  
cgagctggcgaattcc  
>CD\_NM\_005265.2:1171  
CgCctGcgagtctGGtatGCGCTGGCTGACACCTACGAGACTTCAAGAGAGTCTCGTAGGTGTCAGCCAGCTTTTTTGct  
cgagctggcgaattcc  
>CD\_NM\_005265.2:1682  
CgCctGcgagtctGGtatGCCACCTGTCTGTCTCGTCGACAGAGTTCAAGAGACTCTGCGACGACAGACAGGTGATTTTTGct  
cgagctggcgaattcc  
>CD\_NM\_005265.2:948  
CgCctGcgagtctGGtatGCTCCGAGGCTATGAGCTGGCACTTCAAGAGAGTGCCAGCTCATAGCCTCGGATTTTTTGct  
cgagctggcgaattcc  
>CD\_XM\_084845:566  
CgCctGcgagtctGGtatGCGCCTGAACATCTGGGCCCTGATTCAAGAGATCAGGGCCAGATGTTTCAGGCATTTTTGct  
cgagctggcgaattcc  
>CD\_XM\_084845:419  
CgCctGcgagtctGGtatGAACCATGTCTGTCTGGTCCCTGTTTCAAGAGAACAGGGACCAGACGACATGGTCTTTTTGct  
cgagctggcgaattcc  
>CD\_NM\_003641:636  
CgCctGcgagtctGGtatGACTCTGTGACAGTCTACCATATTTCAAGAGAATATGGTAGACTGTACAGAGCTTTTTGct  
cgagctggcgaattcc  
>CD\_NM\_003641:650  
CgCctGcgagtctGGtatGCACCATATTATGTTACAGATAATTTCAAGAGATTATCTGTAACATAATATGGTATTTTTGct  
cgagctggcgaattcc  
>CD\_NM\_003641:648  
CgCctGcgagtctGGtatGCCTACCATATTATGTTACAGATTTCAAGAGAATCTGTAACATAATATGGTAGATTTTTGct  
cgagctggcgaattcc  
>CD\_NM\_003638:638

CgCctGcgagtctGGtatGCCTGTGACAGTCTACCATATTATTCAAGAGATAATATGGTAGACTGTCACAGATTTTTTGct  
cgagctggcgaattcc  
>CD\_NM\_003641:463  
CgCctGcgagtctGGtatGATGCTGTCTGGGCTTCATAGCATTCAAGAGATGCTATGAAGCCCAGACAGCACTTTTTTGct  
cgagctggcgaattcc  
>CD\_XM\_063875:542  
CgCctGcgagtctGGtatGAAGGCCTATGCCTCCACCGCCATTCAAGAGATGGCGGTGGAGGCATAGGCCTGTTTTTGct  
cgagctggcgaattcc  
>CD\_XM\_294476:566  
CgCctGcgagtctGGtatGCGCCTGAACATCTGGGCCCTGATTCAAGAGATCAGGGCCCAGATGTTCAAGCATTTTTTTGct  
cgagctggcgaattcc  
>CD\_NM\_003641:634  
CgCctGcgagtctGGtatGAGGCTCTGTGACAGTCTACCATTTCAAGAGAATGGTAGACTGTCACAGAGCCGTTTTTGct  
cgagctggcgaattcc  
>CD\_NM\_003641:609  
CgCctGcgagtctGGtatGCTGGATTCATCCTGTCACTGGTTTTCAAGAGAACCAGTGACAGGATGAATCCAATTTTTTGct  
cgagctggcgaattcc  
>CD\_NM\_003641.2:581  
CgCctGcgagtctGGtatGACCTGATTCTGGGCATCCTCATTTCAGAGAATGAGGATGCCAGAATCAGGGTTTTTGct  
cgagctggcgaattcc  
>CD\_NM\_003641.2:638  
CgCctGcgagtctGGtatGATGTGACAGTCTACCATATTATTTCAAGAGAATAATATGGTAGACTGTCACAGTTTTTGct  
cgagctggcgaattcc  
>CD\_NM\_003641.2:636  
CgCctGcgagtctGGtatGATCTGTGACAGTCTACCATATTTTTCAAGAGAAATATGGTAGACTGTCACAGAGTTTTTGct  
cgagctggcgaattcc  
>CD\_NM\_003641.2:465  
CgCctGcgagtctGGtatGATGTCTGGGCTTCATAGCATTCTTCAAGAGAGAATGCTATGAAGCCCAGACAGTTTTTGct  
cgagctggcgaattcc  
>CD\_NM\_003641.2:611  
CgCctGcgagtctGGtatGAATTCATCCTGTCACTGGTATTTTTCAAGAGAAATACCAGTGACAGGATGAATCTTTTTTGct  
cgagctggcgaattcc  
>CD\_NM\_003641.2:630  
CgCctGcgagtctGGtatGCTTCGGCTCTGTGACAGTCTACTTCAAGAGAGTAGACTGTCACAGAGCCGAATTTTTTGct  
cgagctggcgaattcc  
>CD\_NM\_003641.2:623  
CgCctGcgagtctGGtatGAACTGGTATTCGGCTCTGTGACTTCAAGAGAGTCAAGAGCCGAATACCAGTGTTTTTTGct  
cgagctggcgaattcc  
>CD\_NM\_003641.2:438  
CgCctGcgagtctGGtatGATTCAACACCCCTCTTCTTGAACCTTCAAGAGAGTTCAGAAGAGGGTGTGAACTTTTTTGct  
cgagctggcgaattcc  
>CD\_NM\_003641.2:368  
CgCctGcgagtctGGtatGCCCTTCCAAGGTCCACCGTGATTTCAAGAGAATCACGGTGGACCTTGAAGGATTTTTTGct  
cgagctggcgaattcc  
>CD\_NM\_003641.2:642  
CgCctGcgagtctGGtatGAACAGTCTACCATATTATGTTATTCAAGAGATAACATAATATGGTAGACTGTCTTTTTTGct  
cgagctggcgaattcc  
>CD\_NM\_003641.2:645  
CgCctGcgagtctGGtatGCGTCTACCATATTATGTTACAGTTCAAGAGACTGTAACATAATATGGTAGACTTTTTTGct  
cgagctggcgaattcc  
>CD\_NM\_003641.2:566  
CgCctGcgagtctGGtatGACCTGAACATCTGGGCCCTGATTTCAGAGAATCAGGGCCCAGATGTTCAAGCATTTTTTTGct  
cgagctggcgaattcc  
>CD\_NM\_003641.2:648

CgCctGcgagtctGGtatGATACCATATTATGTTACAGATATTCAAGAGATATCTGTAACATAATATGGTAGTTTTTGct  
cgagctggcgaattcc  
>CD\_NM\_003641.2:491  
CgCctGcgagtctGGtatGCCTCCGTGAAGTCTAGGGACAGTTCAAGAGACTGTCCCTAGACTTCACGGAGTTTTTTGct  
cgagctggcgaattcc  
>CD\_NM\_003641.2:375  
CgCctGcgagtctGGtatGCAGGTCCACCGTGATCAACATCTTCAAGAGAGATGTTGATCACGGTGGACCTTTTTTTGct  
cgagctggcgaattcc  
>CD\_NM\_003641.2:422  
CgCctGcgagtctGGtatGCTGTCTGCTGGTCCCTGTTCAATTCAAGAGATTGAACAGGGACCAGACGACATTTTTTTGct  
cgagctggcgaattcc  
>CD\_NM\_003641.2:617  
CgCctGcgagtctGGtatGCCCTGTCACTGGTATTCGGCTCTTCAAGAGAGAGCCGAATACCAGTGACAGGATTTTTTTGct  
cgagctggcgaattcc  
>CD\_NM\_003641.2:419  
CgCctGcgagtctGGtatGCCCATGTCTGCTGGTCCCTGTTTTCAAGAGAAACAGGGACCAGACGACATGGTTTTTTGct  
cgagctggcgaattcc  
>CD\_NM\_003641.2:588  
CgCctGcgagtctGGtatGCCTGGGCATCCTCATGACCATTTTTCAAGAGAAATGGTCATGAGGATGCCAGATTTTTTTGct  
cgagctggcgaattcc  
>CD\_NM\_003641.2:579  
CgCctGcgagtctGGtatGAGCCCTGATTCTGGGCATCCTCTTCAAGAGAGAGGATGCCAGAATCAGGGCCTTTTTTTGct  
cgagctggcgaattcc  
>CD\_NM\_003641.2:555  
CgCctGcgagtctGGtatGAACCGCCAAGTGCCTGAACATCTTCAAGAGAGATGTTACGGCACTTGGCGGTGTTTTTTGct  
cgagctggcgaattcc  
>CD\_NM\_003641.2:423  
CgCctGcgagtctGGtatGCGTCTGCTGGTCCCTGTTCAACTTCAAGAGAGTTGAACAGGGACCAGACGACATTTTTTTGct  
cgagctggcgaattcc  
>CD\_NM\_006566:426  
CgCctGcgagtctGGtatGCGCCCTATGCTGAGAGGGTTTATTCAAGAGATAAACCCCTCTCAGCATAGGGCTTTTTTTGct  
cgagctggcgaattcc  
>CD\_NM\_006566.1:323  
CgCctGcgagtctGGtatGCTCCATCAATGGGCATCTTAAGTCAAGAGAGTTAAGATGCCATTGATGGATTTTTTTGct  
cgagctggcgaattcc  
>CD\_NM\_006566.1:1158  
CgCctGcgagtctGGtatGCAGAGAGGATATTTATGTCAACTTCAAGAGAGTTGACATAAATATCCTCTCTTTTTTTGct  
cgagctggcgaattcc  
>CD\_NM\_006566.1:1064  
CgCctGcgagtctGGtatGCATTTACAGAGTCTGGGATACTTCAAGAGAGTATCCAGGACTCTGTAAATATTTTTTTGct  
cgagctggcgaattcc  
>CD\_NM\_006566.1:558  
CgCctGcgagtctGGtatGCTGGCAGAAGGTGATACAGGTGTTCAAGAGACACCTGTATCACCTTCTGCCAATTTTTTTGct  
cgagctggcgaattcc  
>CD\_NM\_006566.1:344  
CgCctGcgagtctGGtatGAACAGGTGGAGTGGTTCAAGATTTCAAGAGAATCTTGAACCACTCCACCTGTGTTTTTTGct  
cgagctggcgaattcc  
>CD\_NM\_006566.1:806  
CgCctGcgagtctGGtatGACCACGGAAGGTGGAGCGTCATTTCAAGAGAATGACGCTCCACCTTCCGTGGCTTTTTTTGct  
cgagctggcgaattcc  
>CD\_NM\_006566.1:985  
CgCctGcgagtctGGtatGCTGTTGTTGTTTGTATCTCAATTCAAGAGATTGAGATAACAAACAACAACAAATTTTTTTGct  
cgagctggcgaattcc  
>CD\_NM\_006566.1:294

CgCctGcgagtctGGtatGCGCCGAGAACATGTCTCTAGAATTCAAGAGATTCTAGAGACATGTTCTCGGCATTTTTTGct  
cgagctggcgaattcc  
>CD\_NM\_006566.1:628  
CgCctGcgagtctGGtatGATTTCCGGAACCTGGAAGAATGTTCAAGAGACATTCCTTTCCAGGTTCCGAAACTTTTTTGct  
cgagctggcgaattcc  
>CD\_NM\_006566.1:493  
CgCctGcgagtctGGtatGAGGAATGCCTCTGAAGATGATGTTCAAGAGACATCATCTTCAGAGGCATTCCGTTTTTGct  
cgagctggcgaattcc  
>CD\_NM\_006566.1:616  
CgCctGcgagtctGGtatGCATAGCCACATTGTTTCGGAACCTCAAGAGAGTTCCGAAACAATGTGGCTATTTTTTTGct  
cgagctggcgaattcc  
>CD\_NM\_006566.1:367  
CgCctGcgagtctGGtatGAGGACCCAGCAGGATTCCATAGTTCAAGAGACTATGGAATCCTGCTGGGTCCCTTTTTTGct  
cgagctggcgaattcc  
>CD\_NM\_006566.1:992  
CgCctGcgagtctGGtatGCGTTTGTATCTCAATTACCACTTCAAGAGAGTGGTAATTGAGATAACAAACATTTTTTGct  
cgagctggcgaattcc  
>CD\_NM\_006566.1:599  
CgCctGcgagtctGGtatGCGGCAGCTGTGCCATCAAATAGTTCAAGAGACTATTTGATGGCACAGCTGCCTTTTTTGct  
cgagctggcgaattcc  
>CD\_NM\_006566.1:258  
CgCctGcgagtctGGtatGCTGTGAAGAGGTGCTTTGGCATTTCGAAGAGAATGCCAAAGCACCTCTTCACATTTTTTGct  
cgagctggcgaattcc  
>CD\_NM\_006566.1:296  
CgCctGcgagtctGGtatGACGAGAACATGTCTCTAGAATTCAAGAGACATTCCTAGAGACATGTTCTCGGTTTTTGct  
cgagctggcgaattcc  
>CD\_NM\_006566.1:525  
CgCctGcgagtctGGtatGCTCCTGCTCTCTTTACTTACTTCAAGAGAGTAAGTGTAAGAGAGCAGGAATTTTTTGct  
cgagctggcgaattcc  
>CD\_NM\_006566.1:327  
CgCctGcgagtctGGtatGCTCAATGGGCATCTTAACACAGTTCAAGAGACTGTGTTAAGATGCCCATGATTTTTTGct  
cgagctggcgaattcc  
>CD\_NM\_006566.1:1185  
CgCctGcgagtctGGtatGCACCTTCTCTCGCAGACCAAAGTTCAAGAGACTTTGGTCTGCGAGAGAAGGTTTTTTTGct  
cgagctggcgaattcc  
>CD\_NM\_006566.1:228  
CgCctGcgagtctGGtatGCTTGGCTCTTCTTCATGTATACTTCAAGAGAGTATACATGAAGAAGAGCCAAATTTTTTGct  
cgagctggcgaattcc  
>CD\_NM\_006566.1:405  
CgCctGcgagtctGGtatGCCATGGCATGGTCATAAGGAAGTTCAAGAGACTTCCTTATGACCATGCCATGATTTTTTGct  
cgagctggcgaattcc  
>CD\_NM\_006566.1:785  
CgCctGcgagtctGGtatGAACAAATAGTGAGCAACTGCAGTTCAAGAGACTGCAGTTGCTCACTATTTGTCTTTTTTGct  
cgagctggcgaattcc  
>CD\_NM\_006566.1:307  
CgCctGcgagtctGGtatGCCTCTAGAATGTGTGTATCCATTTCAAGAGAATGGATACACACATTCTAGAGATTTTTTGct  
cgagctggcgaattcc  
>CD\_NM\_006566.1:523  
CgCctGcgagtctGGtatGCATTCCTGCTCTCTTTACTTTCGAAGAGAAAGTGTAAGAGAGCAGGAATTTTTTGct  
cgagctggcgaattcc  
>CD\_NM\_006566.1:1123  
CgCctGcgagtctGGtatGCCCGGTCAACCTACCAATCAATTTCAAGAGAATTGATTGGTAGGTTGACCGGTTTTTTTGct  
cgagctggcgaattcc  
>CD\_NM\_006566.1:575



CgCctGcgagtctGGtatGCGGTGGTTCAGTCAGATAGTTTTTCAAGAGAAAACCTATCTGACTGAACCACCTTTTTTGGct  
cgagctggcgaattcc  
>CD\_NM\_006566.1:958  
CgCctGcgagtctGGtatGATCTTTGTGGCTGGAGGGACAGTTCAAGAGACTGTCCCTCCAGCCACAAAGAGTTTTTGGct  
cgagctggcgaattcc  
>CD\_NM\_006566.1:455  
CgCctGcgagtctGGtatGCTTCAACGATGGCTTCCAATAATTCAAGAGATTATTGGAAGCCATCGTTGAATTTTTTGGct  
cgagctggcgaattcc  
>CD\_NM\_006566.1:1051  
CgCctGcgagtctGGtatGAAGAGAAGAGATCTATTTACAGTTCAAGAGACTGTAAATAGATCTCTTCTCTTTTTTGGct  
cgagctggcgaattcc  
>CD\_NM\_006566.1:720  
CgCctGcgagtctGGtatGCCAGATCGACCTCTTAACCTACTTCAAGAGAGTAAGTTAAGAGGTCGATCTGATTTTTTGGct  
cgagctggcgaattcc  
>CD\_NM\_006566.1:426  
CgCctGcgagtctGGtatGACCCTATGCTGAGAGGGTTTACTTCAAGAGAGTAAACCCTCTCAGCATAGGGCTTTTTTGGct  
cgagctggcgaattcc  
>CD\_NM\_006566.1:956  
CgCctGcgagtctGGtatGACCTCTTTGTGGCTGGAGGGACTTCAAGAGAGTCCCTCCAGCCACAAAGAGGGTTTTTGGct  
cgagctggcgaattcc  
>CD\_NM\_002456:325  
CgCctGcgagtctGGtatGATGCAGAGAGACATTTCTGAAATTTCAAGAGATTTTCAGAAATGTCTCTCTGCAGTTTTTGGct  
cgagctggcgaattcc  
>CD\_NM\_002456:404  
CgCctGcgagtctGGtatGAGCCAGGATCTGTGGTGGTACATTCAAGAGATGTACCACCACAGATCCTGGCCTTTTTTGGct  
cgagctggcgaattcc  
>CD\_NM\_002456:495  
CgCctGcgagtctGGtatGCACGGAAGCAGCCTCTCGATATTTCAAGAGAATATCGAGAGGCTGCTTCCGTTTTTTTTGGct  
cgagctggcgaattcc  
>CD\_NM\_002456:496  
CgCctGcgagtctGGtatGCCGGAAGCAGCCTCTCGATATATTCAAGAGATATATCGAGAGGCTGCTTCCGTTTTTTTTGGct  
cgagctggcgaattcc  
>CD\_NM\_002456:634  
CgCctGcgagtctGGtatGACGCTGGCCATGTCTATCTCATTTCAAGAGATGAGATAGACAATGGCCAGCGTTTTTTGGct  
cgagctggcgaattcc  
>CD\_NM\_002456.4:376  
CgCctGcgagtctGGtatGCTCTGGGCCTCTCCAATATTAATTCAAGAGATTAATATTGGAGAGGCCCAGAATTTTTTGGct  
cgagctggcgaattcc  
>CD\_NM\_002456.4:517  
CgCctGcgagtctGGtatGCCCTGACGATCTCAGACGTCAGTTCAAGAGACTGACGTCTGAGATCGTCAGGTTTTTTGGct  
cgagctggcgaattcc  
>CD\_NM\_002456.4:641  
CgCctGcgagtctGGtatGAATTGTCTATCTCATTGCCTTGTTCAAGAGACAAGGCAATGAGATAGACAATGTTTTTGGct  
cgagctggcgaattcc  
>CD\_NM\_002456.4:402  
CgCctGcgagtctGGtatGCGGCCAGGATCTGTGGTGGTACTTCAAGAGAGTACCACCACAGATCCTGGCCTTTTTTGGct  
cgagctggcgaattcc  
>CD\_NM\_002456.4:534  
CgCctGcgagtctGGtatGATCAGCGTGAGTGATGTGCCATTTCAAGAGAATGGCACATCACTCACGCTGACTTTTTTGGct  
cgagctggcgaattcc  
>CD\_NM\_002456.4:664  
CgCctGcgagtctGGtatGATGTCTGTCAGTGCCGCCGAAATTTCAAGAGATTTTCGGCGGCACTGACAGACAGTTTTTGGct  
cgagctggcgaattcc  
>CD\_NM\_002456.4:404

CgCctGcgagtctGGtatGACCAGGATCTGTGGTGGTACAATTCAAGAGATTGTACCACCACAGATCCTGGCTTTTTTGct  
cgagctggcgaattcc  
>CD\_NM\_002456.4:184  
CgCctGcgagtctGGtatGACCAGAGAAGTTCAGTGCCCAGTTCAGAGACTGGGCACTGAACTTCTCTGGGTTTTTGct  
cgagctggcgaattcc  
>CD\_NM\_002456.4:325  
CgCctGcgagtctGGtatGCGCAGAGAGACATTTCTGAAATTTCAAGAGAATTTTCAGAAATGTCTCTCTGCATTTTTTGct  
cgagctggcgaattcc  
>CD\_NM\_002456.4:104  
CgCctGcgagtctGGtatGACTCCTCACAGTGCTTACAGTTTTCAAGAGAACTGTAAGCACTGTGAGGAGCTTTTTTGct  
cgagctggcgaattcc  
>CD\_NM\_002456.4:832  
CgCctGcgagtctGGtatGACAGCAGCCTCTCTTACACAAATTCAGAGATTGTGTAAAGAGAGGCTGCTGCTTTTTTGct  
cgagctggcgaattcc  
>CD\_NM\_002456.4:201  
CgCctGcgagtctGGtatGACCAGCTCTACTGAGAAGAATGTTCAAGAGACATTCTTCTCAGTAGAGCTGGGTTTTTGct  
cgagctggcgaattcc  
>CD\_NM\_002456.4:668  
CgCctGcgagtctGGtatGATGTCAGTGCCGCCGAAAGAATTCAGAGAGTTCTTTCGGCGGCACTGACAGTTTTTGct  
cgagctggcgaattcc  
>CD\_NM\_002456.4:807  
CgCctGcgagtctGGtatGAAGAAGGTTTCTGCAGGTAATGTTCAAGAGACATTACCTGCAGAAACCTTCTTTTTTGct  
cgagctggcgaattcc  
>CD\_NM\_002456.4:469  
CgCctGcgagtctGGtatGCGGAGACACAGTTCATCAGTATTCAAGAGATACTGATTGAACTGTGTCTCCATTTTTTGct  
cgagctggcgaattcc  
>CD\_NM\_002456.4:196  
CgCctGcgagtctGGtatGAAGTGCCAGCTCTACTGAGAATTCAGAGATTCTCAGTAGAGCTGGGCACTGTTTTTGct  
cgagctggcgaattcc  
>CD\_NM\_002456.4:458  
CgCctGcgagtctGGtatGCGTCCACGACGTGGAGACACAGTTCAGAGACTGTGTCTCCACGTGCGTGACATTTTTTGct  
cgagctggcgaattcc  
>CD\_NM\_002456.4:100  
CgCctGcgagtctGGtatGCGCTGCTCCTCACAGTGCTTACTTCAAGAGAGTAAGCACTGTGAGGAGCAGCATTTTTTGct  
cgagctggcgaattcc  
>CD\_NM\_002456.4:449  
CgCctGcgagtctGGtatGCACCATCAATGTCCACGACGTGTTCAAGAGACACGTGCGTGACATTGATGGTATTTTTTGct  
cgagctggcgaattcc  
>CD\_NM\_002456.4:496  
CgCctGcgagtctGGtatGAGGAAGCAGCCTCTCGATATAATTCAGAGATTATATCGAGAGGCTGCTTCCGTTTTTGct  
cgagctggcgaattcc  
>CD\_NM\_002456.4:126  
CgCctGcgagtctGGtatGATTACGGGTCTGGTCATGCAATTCAGAGATTGCATGACCAGAACCCGTAACTTTTTGct  
cgagctggcgaattcc  
>CD\_NM\_002456.4:323  
CgCctGcgagtctGGtatGACTGCAGAGAGACATTTCTGAATTCAGAGATTTCAGAAATGTCTCTCTGCAGCTTTTTTGct  
cgagctggcgaattcc  
>CD\_NM\_002456.4:866  
CgCctGcgagtctGGtatGCGCCACTTCTGCCAACTTGTAGTTCAGAGACTACAAGTTGGCAGAAGTGGCTTTTTTGct  
cgagctggcgaattcc  
>CD\_NM\_002456.4:75  
CgCctGcgagtctGGtatGAGCACCCAGTCTCCTTTCTTCTTCAAGAGAGGAAGAAAGGAGACTGGGTGCCTTTTTTGct  
cgagctggcgaattcc  
>CD\_NM\_002456.4:827

CgCctGcgagtctGGtatGCGGTGGCAGCAGCCTCTCTTACTTCAAGAGAGTAAGAGAGGCTGCTGCCACCATTTTTGct  
cgagctggcgaattcc  
>CD\_NM\_002456.4:612  
CgCctGcgagtctGGtatGATGCTGGTCTGTGTTCTGGTTGTTCAAGAGACAACCAGAACACAGACCAGCACTTTTTGct  
cgagctggcgaattcc  
>CD\_NM\_002456.4:430  
CgCctGcgagtctGGtatGATCTGGCCTTCCGAGAAGGTACTTCAAGAGAGTACCTTCTCGGAAGGCCAGAGTTTTGct  
cgagctggcgaattcc  
>CD\_NM\_002456.4:634  
CgCctGcgagtctGGtatGAGCTGGCCATTGTCTATCTCATTTC AAGAGAATGAGATAGACAATGGCCAGCGTTTTGct  
cgagctggcgaattcc  
>CD\_NM\_033316:163  
CgCctGcgagtctGGtatGAAGCAGCACAAAGTGC GGCAACATTCAAGAGATGTTGCCGCACTTGTGCTGCTTTTTGct  
cgagctggcgaattcc  
>CD\_NM\_033316:175  
CgCctGcgagtctGGtatGCGCGGCAACATGAGCGAGGCCTTTC AAGAGAAGGCCTCGCTCATGTTGCCGCACTTTTTGct  
cgagctggcgaattcc  
>CD\_NM\_033316:281  
CgCctGcgagtctGGtatGCGGCTGACGCCATCACTCTG GATTCAAGAGATCCAGAGTGATGGCGTCAGCCTTTTTGct  
cgagctggcgaattcc  
>CD\_NM\_033316:343  
CgCctGcgagtctGGtatGCAGCCGGTGGTGGGCGAAGTGT TTTCAAGAGAACACTTCGCCACCACCGGCTTTTTGct  
cgagctggcgaattcc  
>CD\_NM\_033316:676  
CgCctGcgagtctGGtatGACCCTGGAGAGATACTACGACT TTTCAAGAGAAGTCGTAGTATCTCTCCAGGGTTTTGct  
cgagctggcgaattcc  
>CD\_NM\_033316:704  
CgCctGcgagtctGGtatGAGGCCTTCCGGTGCCTGGCGG ATTTCAAGAGATCCGCCAGGCACCGGAAGGCCCTTTTTGct  
cgagctggcgaattcc  
>CD\_NM\_005929:2105  
CgCctGcgagtctGGtatGAGGCGGTGCCTGTGCGAGAGA ATTTCAAGAGATCTCTCCGACAGGCACCGCCCTTTTTGct  
cgagctggcgaattcc  
>CD\_NM\_005929:1789  
CgCctGcgagtctGGtatGCGGCACACAACCGTCTTTT GACATTTCAAGAGATGTCAAAGACGGTTGTGTGCCTTTTTGct  
cgagctggcgaattcc  
>CD\_NM\_005929:2008  
CgCctGcgagtctGGtatGAACCTGTTTGGAGACGACCAC ATTTCAAGAGATGTGGTCGTCTCCAAACAGGTCTTTTTGct  
cgagctggcgaattcc  
>CD\_NM\_005929:805  
CgCctGcgagtctGGtatGAAGGCCCTGCTGTACAGGACT TTTCAAGAGAAGTCCTGTGACAGCAGGGCCTTTTTGct  
cgagctggcgaattcc  
>CD\_NM\_005929:1090  
CgCctGcgagtctGGtatGAAGGCGTGGCTGGGCCATGAG TTTCAAGAGAACTCATGGCCCAGCCACGCCCTTTTTGct  
cgagctggcgaattcc  
>CD\_NM\_005929:163  
CgCctGcgagtctGGtatGAAGCAGCACAAAGTGC GGCAACATTCAAGAGATGTTGCCGCACTTGTGCTGCTTTTTGct  
cgagctggcgaattcc  
>CD\_NM\_005929:373  
CgCctGcgagtctGGtatGAAGGTCGGTACCTCCTATTAC GTTCAAGAGACGTAATAGGAGGTACCGACCTTTTTGct  
cgagctggcgaattcc  
>CD\_NM\_005929:370  
CgCctGcgagtctGGtatGAAAGAGGTCGGTACCTCCTAT TTTTCAAGAGAAATAGGAGGTACCGACCTTTGTTTTGct  
cgagctggcgaattcc  
>CD\_NM\_005929:343

CgCctGcgagtctGGtatGCAGCCGGTGGTGGGCGAAGTGTTC AAGAGA AACTTCGCCACCACCGCTTTTTTTGct  
cgagctggcgaattcc  
>CD\_NM\_005929:676  
CgCctGcgagtctGGtatGACCCTGGAGAGATACTACGACTTTCAAGAGAAGTCGTAGTATCTCTCCAGGGTTTTTTGct  
cgagctggcgaattcc  
>CD\_NM\_005929:354  
CgCctGcgagtctGGtatGAGGCGAAGTGTACGATCAAGAGTTCAAGAGACTCTTGATCGTACACTTCGCCTTTTTTGct  
cgagctggcgaattcc  
>CD\_NM\_005929.3:2000  
CgCctGcgagtctGGtatGAGCCCAGGACCTGTTTGGAGACTTCAAGAGAGTCTCCAAACAGGTCTGGGCCTTTTTTGct  
cgagctggcgaattcc  
>CD\_NM\_005929.3:962  
CgCctGcgagtctGGtatGCGGCCAGCGTCTGTTTCAAGAGACTTCAAGAGAGTGGCTGAACAGACGCTGGCCTTTTTTGct  
cgagctggcgaattcc  
>CD\_NM\_005929.3:1796  
CgCctGcgagtctGGtatGCACCGTCTTTGACAACACAACTTCAAGAGAGTTTGTGTTGTCAAAGACGGTTTTTTTgct  
cgagctggcgaattcc  
>CD\_NM\_005929.3:2105  
CgCctGcgagtctGGtatGAGCGGTGCTGTCGAGAGAAATTC AAGAGATTTCTCTCCGACAGGCACCGCTTTTTTTGct  
cgagctggcgaattcc  
>CD\_NM\_005929.3:2055  
CgCctGcgagtctGGtatGCCCTCCAACATCATGGCCAAGTTCAAGAGACTTGGCCATGATAGTTGGAGGATTTTTTTGct  
cgagctggcgaattcc  
>CD\_NM\_005929.3:800  
CgCctGcgagtctGGtatGAGGCCAGGCCCTGCTGTACAGTTCAAGAGACTGTGACAGCAGGGCTGGCCTTTTTTGct  
cgagctggcgaattcc  
>CD\_NM\_005929.3:2015  
CgCctGcgagtctGGtatGCGGAGACGACCACAATAAGAACTTCAAGAGAGTTCTTATTGTGGTCTCCATTTTTTTGct  
cgagctggcgaattcc  
>CD\_NM\_005929.3:1789  
CgCctGcgagtctGGtatGAGCACACAACCGTCTTTGACAATTC AAGAGATTGTCAAAGACGGTTGTGCCTTTTTTTGct  
cgagctggcgaattcc  
>CD\_NM\_005929.3:442  
CgCctGcgagtctGGtatGCAGGCGTGAAGTCTGCCACACTTCAAGAGAGTGTGGCAGGACTTCACGCCTTTTTTTTgct  
cgagctggcgaattcc  
>CD\_NM\_005929.3:1592  
CgCctGcgagtctGGtatGCGCAGTGAGCGAGTTCTTCAATTTCAAGAGAATTGAAGAACTCGCTCACTGCTTTTTTTGct  
cgagctggcgaattcc  
>CD\_NM\_005929.3:1229  
CgCctGcgagtctGGtatGACGGCAGCGCTCAAGCCAGAGTTCAAGAGACTCTGGCTTGAGGGCTGCCGGTTTTTTGct  
cgagctggcgaattcc  
>CD\_NM\_005929.3:1838  
CgCctGcgagtctGGtatGAGCTGCTGAGCTCAGGTCAGAGTTCAAGAGACTCTGACCTGAGCTCAGCAGCCTTTTTTTGct  
cgagctggcgaattcc  
>CD\_NM\_005929.3:1121  
CgCctGcgagtctGGtatGAATGAAGGGTCTGCTCTGTGACTTCAAGAGAGTCACAGAGCAGACCCTTCATGTTTTTTGct  
cgagctggcgaattcc  
>CD\_NM\_005929.3:539  
CgCctGcgagtctGGtatGATGCGATGTACTCAAAGCTGTCTTCAAGAGAGACAGCTTTGAGTACATCGCAGTTTTTTGct  
cgagctggcgaattcc  
>CD\_NM\_005929.3:1250  
CgCctGcgagtctGGtatGAATCCAGTGCGTGTGAGCCAAGTTCAAGAGACTTGGCTGACACGCACTGGATTTTTTTGct  
cgagctggcgaattcc  
>CD\_NM\_005929.3:1979

CgCctGcgagtctGGtatGAGTGTATGGACTGCTGGACAAGTTCAAGAGACTTGTCCAGCAGTCCATACACGTTTTTgct  
cgagctggcgaattcc  
>CD\_NM\_002348:439  
CgCctGcgagtctGGtatGCAGCCAGATAAACCAAAGGAATTTCAAGAGATTCCTTTGGTTTATCTGGGCTTTTTTgct  
cgagctggcgaattcc  
>CD\_NM\_001033667.1:271  
CgCctGcgagtctGGtatGAATTGAGAACGTCATCTGGATTTTCAAGAGAAATCCAGATGACGTTCTCAATCTTTTTGct  
cgagctggcgaattcc  
>CD\_NM\_001033667.1:410  
CgCctGcgagtctGGtatGATGACTCTGAATGATGCAGGATTTCAAGAGAATCCTGCATCATTTCAGAGTCAGTTTTTgct  
cgagctggcgaattcc  
>CD\_NM\_001033667.1:393  
CgCctGcgagtctGGtatGACCTGTGCATCAGCAATCTGACTTCAAGAGAGTCAGATTGCTGATGCACAGGGTTTTTgct  
cgagctggcgaattcc  
>CD\_NM\_001033667.1:430  
CgCctGcgagtctGGtatGCTCCTACAAAGCCCAGATAAACTTCAAGAGAGTTTATCTGGGCTTTGTAGGATTTTTTgct  
cgagctggcgaattcc  
>CD\_NM\_001033667.1:259  
CgCctGcgagtctGGtatGCGTAGACACAGAGATTGAGAACTTCAAGAGAGTTCTCAATCTCTGTGTCTACTTTTTTgct  
cgagctggcgaattcc  
>CD\_NM\_001033667.1:387  
CgCctGcgagtctGGtatGATTACTCCCTGTGCATCAGCAATTTCAAGAGATTGCTGATGCACAGGGAGTAACTTTTTGct  
cgagctggcgaattcc  
>CD\_NM\_001033667.1:400  
CgCctGcgagtctGGtatGAATCAGCAATCTGACTCTGAATTTCAAGAGAATTCAGAGTCAGATTGCTGATGTTTTTgct  
cgagctggcgaattcc  
>CD\_NM\_001033667.1:85  
CgCctGcgagtctGGtatGCCCTGGGCCTTCTCCAGTAAGTTCAAGAGACTTACTGGAGAAAGGCCAGGATTTTTTgct  
cgagctggcgaattcc  
>CD\_NM\_001033667.1:246  
CgCctGcgagtctGGtatGACCTAAACATCTCAGTAGACACTTCAAGAGAGTGTCTACTGAGATGTTTAGGGTTTTTgct  
cgagctggcgaattcc  
>CD\_NM\_001033667.1:570  
CgCctGcgagtctGGtatGACGGCCTGGAGTCCATCATCAGTTCAAGAGACTGATGATGGACTCCAGGCCGTTTTTgct  
cgagctggcgaattcc  
>CD\_NM\_001033667.1:439  
CgCctGcgagtctGGtatGCGCCAGATAAACCAAAGGAATTTCAAGAGAATTCCTTTGGTTTATCTGGGCTTTTTTgct  
cgagctggcgaattcc  
>CD\_NM\_001033667.1:58  
CgCctGcgagtctGGtatGCCCAAAGAGTCACACAGATGACTTCAAGAGAGTCATCTGTGTGACTCTTTGGTTTTTgct  
cgagctggcgaattcc  
>CD\_NM\_001033667.1:112  
CgCctGcgagtctGGtatGAAGGAGTCAGCTGCAAATATTCTTCAAGAGAGAATATTTGCAGCTGACTCCTCTTTTTGct  
cgagctggcgaattcc  
>CD\_NM\_001033667.1:265  
CgCctGcgagtctGGtatGAACAGAGATTGAGAACGTCATCTTCAAGAGAGATGACGTTCTCAATCTCTGTGTTTTTgct  
cgagctggcgaattcc  
>CD\_NM\_001033667.1:125  
CgCctGcgagtctGGtatGAAAATATTCTTCTGTCTACTTCAAGAGAGTAGAACAGAAGAGAATATTTGTTTTTgct  
cgagctggcgaattcc  
>CD\_NM\_001033667.1:404  
CgCctGcgagtctGGtatGCGCAATCTGACTCTGAATGATGTTCAAGAGACATCATTTCAGAGTCAGATTGCTTTTTTgct  
cgagctggcgaattcc  
>CD\_NM\_001033667.1:491

CgCctGcgagtctGGtatGATGTTCTGCTATGCACCATTTATTCAAGAGATAAATGGTGCATAGACGAACAGTTTTTgct  
cgagctggcgaattcc  
>CD\_NM\_001033667.1:151  
CgCctGcgagtctGGtatGATCTCTCCTCTCCTGCTCATGTTCAAGAGACATGAGCAGGAAGAGGAGAGAGTTTTTgct  
cgagctggcgaattcc  
>CD\_NM\_001033667.1:311  
CgCctGcgagtctGGtatGACTTTCGCACGTCCCAAAGAAATTC AAGAGATTTCTTTGGGACGTGCGAAAGCTTTTTGct  
cgagctggcgaattcc  
>CD\_NM\_001033667.1:497  
CgCctGcgagtctGGtatGATCTATGCACCATTTATTGAAATTC AAGAGATTTCAATAAATGGTGCATAGACTTTTTGct  
cgagctggcgaattcc  
>CD\_NM\_001033667.1:441  
CgCctGcgagtctGGtatGACCAGATAAACCAAAGGAATTTTTCAAGAGAAAATTCCTTTGGTTTATCTGGGTTTTTgct  
cgagctggcgaattcc  
>CD\_NM\_001033667.1:308  
CgCctGcgagtctGGtatGATTGCTTTCGCACGTCCCAAAGTTCAAGAGACTTTGGGACGTGCGAAAGCAAGTTTTTgct  
cgagctggcgaattcc  
>CD\_NM\_001033667.1:96  
CgCctGcgagtctGGtatGCCTCCAGTAAGCCACAGAGGAGTTCAAGAGACTCCTCTGTGGCTTACTGGAGATTTTTGct  
cgagctggcgaattcc  
>CD\_NM\_001033667.1:391  
CgCctGcgagtctGGtatGATCCCTGTGCATCAGCAATCTGTTCAAGAGACAGATTGCTGATGCACAGGGAGTTTTTgct  
cgagctggcgaattcc  
>CD\_NM\_001033667.1:381  
CgCctGcgagtctGGtatGCGTGGAGTTACTCCCTGTGCATTTCAAGAGAATGCACAGGGAGTAACTCCACTTTTTTgct  
cgagctggcgaattcc  
>CD\_NM\_001033667.1:89  
CgCctGcgagtctGGtatGAGGCCTTTCTCCAGTAAGCCACTTCAAGAGAGTGGCTTACTGGAGAAAGGCCCTTTTTGct  
cgagctggcgaattcc  
>CD\_NM\_001033667.1:123  
CgCctGcgagtctGGtatGCGCAAATATTTCTCTTCTGTTCTTTCAAGAGAAGAACAGAAGAGAATATTTGCATTTTTGct  
cgagctggcgaattcc  
>CD\_NM\_001033667.1:172  
CgCctGcgagtctGGtatGAGGACTAAGAGCCTCTGGAAAGTTCAAGAGACTTTCAGAGGCTCTTAGTCCCTTTTTGct  
cgagctggcgaattcc  
>CD\_NM\_001033667.1:171  
CgCctGcgagtctGGtatGCGGGACTAAGAGCCTCTGGAAATTC AAGAGATTTCCAGAGGCTCTTAGTCCATTTTTGct  
cgagctggcgaattcc  
>CD\_NM\_001033667.1:170  
CgCctGcgagtctGGtatGCTGGGACTAAGAGCCTCTGGAATTC AAGAGATTCAGAGGCTCTTAGTCCCATTTTTGct  
cgagctggcgaattcc  
>CD\_NM\_001033667.1:594  
CgCctGcgagtctGGtatGACCTGGCTGAGCCACGTGTGAGTTCAAGAGACTCACACGTGGCTCAGCCAGGGTTTTTgct  
cgagctggcgaattcc  
>CD\_NM\_001033667.1:526  
CgCctGcgagtctGGtatGAGTCCACGTCATCGAGGGTGACTTCAAGAGAGTACCCTCGATGACGTGGACGTTTTTgct  
cgagctggcgaattcc  
>CD\_NM\_000311.2:821  
CgCctGcgagtctGGtatGCTCCTCCTGATCTCTTTCCTCATTC AAGAGATGAGGAAAGAGATCAGGAGGATTTTTTgct  
cgagctggcgaattcc  
>CD\_NM\_000311.2:633  
CgCctGcgagtctGGtatGATGCGTCAATATCACAATCAAGTTCAAGAGACTTGATTGTGATATTGACGCAGTTTTTgct  
cgagctggcgaattcc  
>CD\_NM\_000311.2:821

CgCtGcgagtctGGtatGCCCTCCTGATCTCTTTCTCATTTC AAGAGAATGAGGAAAGAGATCAGGAGGATTTTTGct  
cgagctggcgaattcc  
>CD\_NM\_000311.2:754  
CgCtGcgagtctGGtatGAAGAGGGAATCTCAGGCCTATTTTC AAGAGAAATAGGCCTGAGATTCCCTCTCTTTTTGct  
cgagctggcgaattcc  
>CD\_NM\_000311.2:525  
CgCtGcgagtctGGtatGAAGTGACTATGAGGACCGTTACTTCA AAGAGAGTAACGGTCTCATAGTCACTGTTTTGct  
cgagctggcgaattcc  
>CD\_NM\_000311.2:128  
CgCtGcgagtctGGtatGCTCTCTTTGTGGCCACATGGAGTTCA AAGAGACTCCATGTGGCCACAAAGAGAATTTTTGct  
cgagctggcgaattcc  
>CD\_NM\_000311.2:742  
CgCtGcgagtctGGtatGCTCACCCAGTACGAGAGGGAATTTCA AAGAGAATTCCTCTCGTACTGGGTGATTTTTGct  
cgagctggcgaattcc  
>CD\_NM\_000311.2:381  
CgCtGcgagtctGGtatGAACCCACAGTCAGTGAACAAGTTCA AAGAGACTTGTTCCTGACTGTGGGTGTTTTGct  
cgagctggcgaattcc  
>CD\_NM\_000311.2:523  
CgCtGcgagtctGGtatGAGCAGTGACTATGAGGACCGTTTTCA AAGAGAAACGGTCTCATAGTCACTGCCTTTTTGct  
cgagctggcgaattcc  
>CD\_NM\_000311.2:693  
CgCtGcgagtctGGtatGAACCGAGACCGACGTTAAGATGTTCA AAGAGACATCTTAACGTCCGTCTCGGTGTTTTGct  
cgagctggcgaattcc  
>CD\_NM\_000311.2:714  
CgCtGcgagtctGGtatGAATGGAGCGCGTGGTTGAGCAGTTCA AAGAGACTGCTCAACCACGCGCTCCATCTTTTTGct  
cgagctggcgaattcc  
>CD\_NM\_000311.2:699  
CgCtGcgagtctGGtatGAACCGACGTTAAGATGATGGAGTTCA AAGAGACTCCATCATCTTAACGTCCGTCTTTTTGct  
cgagctggcgaattcc  
>CD\_NM\_000311.2:591  
CgCtGcgagtctGGtatGACCCATGGATGAGTACAGCAACTTCA AAGAGAGTTGCTGTACTCATCCATGGGCTTTTTGct  
cgagctggcgaattcc  
>CD\_NM\_000311.2:147  
CgCtGcgagtctGGtatGAAGTGACCTGGCCCTCTGCAAGTTCA AAGAGACTTGCAGAGGCCAGGTCCTTTTTGct  
cgagctggcgaattcc  
>CD\_NM\_000311.2:122  
CgCtGcgagtctGGtatGCGCTGGTTCTCTTTGTGGCCACTTCA AAGAGAGTGGCCACAAAGAGAACCAGCATTTTTGct  
cgagctggcgaattcc  
>CD\_NM\_000311.2:656  
CgCtGcgagtctGGtatGCGCACACGGTCACCACAACCACTTCA AAGAGAGTGGTTGTGGTGACCGTGTGCTTTTTGct  
cgagctggcgaattcc  
>CD\_NM\_000311.2:623  
CgCtGcgagtctGGtatGCTGTGCACGACTGCGTCAATATTTCA AAGAGAAATATTGACGCAGTCGTGCACAATTTTTGct  
cgagctggcgaattcc  
>CD\_NM\_000311.2:501  
CgCtGcgagtctGGtatGAAGCAGGCCCATCATACTTTCTTCA AAGAGAGAAATGTATGATGGGCCTGCTTTTTGct  
cgagctggcgaattcc  
>CD\_NM\_000311.2:479  
CgCtGcgagtctGGtatGACTACATGCTGGGAAGTGCCATTTCA AAGAGAAATGGCACTCCAGCATGTAGCTTTTTGct  
cgagctggcgaattcc  
>CD\_NM\_000311.2:810  
CgCtGcgagtctGGtatGCCACCTGTGATCCTCCTGATCTTCA AAGAGAGATCAGGAGGATCACAGGTGGATTTTTGct  
cgagctggcgaattcc  
>CD\_NM\_000311.2:695

CgCtGcgagtctGGtatGACGAGACCGACGTTAAGATGATTTCAAGAGAATCATCTTAACGTCCGGTCTCGGTTTTTGct  
cgagctggcgaattcc  
>CD\_NM\_000311.2:825  
CgCtGcgagtctGGtatGACTGATCTCTTTCCTCATCTTCTTCAAGAGAGAAGATGAGGAAAGAGATCAGGTTTTTGct  
cgagctggcgaattcc  
>CD\_NM\_000311.2:513  
CgCtGcgagtctGGtatGAATACATTTTCGGCAGTGACTATTTCAAGAGAATAGTCACTGCCGAAATGTATGTTTTTGct  
cgagctggcgaattcc  
>CD\_NM\_000311.2:834  
CgCtGcgagtctGGtatGCTTCTCATCTTCTGATAGTGTTCAGAGACACTATCAGGAAGATGAGGAAATTTTTGct  
cgagctggcgaattcc  
>CD\_NM\_000311.2:723  
CgCtGcgagtctGGtatGAGTGGTTGAGCAGATGTGTATCTTCAAGAGAGATACACATCTGCTCAACCACGTTTTTGct  
cgagctggcgaattcc  
>CD\_NM\_000311.2:529  
CgCtGcgagtctGGtatGAACTATGAGGACCGTTACTATCTTCAAGAGAGATAGTAACGGTCTCATAGTCTTTTTGct  
cgagctggcgaattcc  
>CD\_NM\_000311.2:485  
CgCtGcgagtctGGtatGCGCTGGGAAGTGCCATGAGCAGTTCAAGAGACTGCTCATGGCACTTCCCAGCATTTTTGct  
cgagctggcgaattcc  
>CD\_NM\_000311.2:430  
CgCtGcgagtctGGtatGAACATGGCTGGTGTGCAGCAGTTCAAGAGACTGCTGCAGCACCAGCCATGTTTTTTGct  
cgagctggcgaattcc  
>CD\_NM\_000311.2:689  
CgCtGcgagtctGGtatGCCTTACCGAGACCGACGTTAATTCAAGAGATTAACGTCCGGTCTCGGTGAAGTTTTTGct  
cgagctggcgaattcc  
>CD\_NM\_000311.2:225  
CgCtGcgagtctGGtatGAAGCCCTGGAGGCAACCGCTACTTCAAGAGAGTAGCGGTTGCCTCCAGGGCTTTTTTGct  
cgagctggcgaattcc  
>CD\_NM\_000311.2:114  
CgCtGcgagtctGGtatGATGCTGGATGCTGGTCTCTTTTTCAAGAGAAAAGAGAACCAGCATCCAGCAGTTTTTGct  
cgagctggcgaattcc  
>CD\_NM\_000311.2:807  
CgCtGcgagtctGGtatGATCTCCACCTGTGATCCTCTGTTCAAGAGACAGGAGGATCACAGGTGGAGAGTTTTTGct  
cgagctggcgaattcc  
>CD\_NM\_000311.2:124  
CgCtGcgagtctGGtatGATGGTTCTCTTTGTGGCCACATTTCAAGAGAATGTGGCCACAAAGAGAACCAGTTTTTGct  
cgagctggcgaattcc  
>CD\_NM\_004615:278  
CgCtGcgagtctGGtatGAGCCTGTTTGGATGCTTTGCTATTCAAGAGATAGCAAAGCATCCAAACAGGCCTTTTTTGct  
cgagctggcgaattcc  
>CD\_NM\_004615:655  
CgCtGcgagtctGGtatGAAAGGGTTGTTATGATCTGGTATTCAAGAGATACCAGATCATAACAACCTTCTTTTTGct  
cgagctggcgaattcc  
>CD\_NM\_004615:725  
CgCtGcgagtctGGtatGAGAATCGCATCTCCCAGTTAATTCAAGAGATTAACGGGAGAATGCGATTCCTTTTTGct  
cgagctggcgaattcc  
>CD\_NM\_004615.2:278  
CgCtGcgagtctGGtatGACCTGTTTGGATGCTTTGCTACTTCAAGAGAGTAGCAAAGCATCCAAACAGGCCTTTTTGct  
cgagctggcgaattcc  
>CD\_NM\_004615.2:381  
CgCtGcgagtctGGtatGCTCAGGGTTTGTGTTTCGTCATTTCAAGAGAATGACGAAACACAAACCTGAATTTTTGct  
cgagctggcgaattcc  
>CD\_NM\_004615.2:432



CgCctGcgagtctGGtatGAACGGACGCTATGCAGACTTACTTCAAGAGAGTAAGTCTGCATAGCGTCCGTGTTTTTGct  
cgagctggcgaattcc  
>CD\_NM\_004615.2:586  
CgCctGcgagtctGGtatGCTGAACGAACTGATTGTAATCTTCAAGAGAGATTACAATCAGTTTCGTTCATTTTTGct  
cgagctggcgaattcc  
>CD\_NM\_004615.2:655  
CgCctGcgagtctGGtatGCAGGGTTGTTATGATCTGGTAATTTCAAGAGATTACCAGATCATAACAACCCTTTTTTTGct  
cgagctggcgaattcc  
>CD\_NM\_004615.2:447  
CgCctGcgagtctGGtatGAACTTACAATGGCAATGATGAGTTCAAGAGACTCATCATTGCCATTGTAAGTCTTTTTTGct  
cgagctggcgaattcc  
>CD\_NM\_004615.2:312  
CgCctGcgagtctGGtatGACCATGGATGCTGAACTGTATTTCAAGAGAATACAGTTTCAGCATCCATGGGTTTTTGct  
cgagctggcgaattcc  
>CD\_NM\_004615.2:125  
CgCctGcgagtctGGtatGCCTCCTTCGTCTTCTGGATCACTTCAAGAGAGTGATCCAGAAGACGAAGGAGTTTTTTTGct  
cgagctggcgaattcc  
>CD\_NM\_004615.2:182  
CgCctGcgagtctGGtatGCACTTACTCTGGGCACCTATATTTCAAGAGAATATAGGTGCCAGAGTAAGTTTTTTTGct  
cgagctggcgaattcc  
>CD\_NM\_004615.2:507  
CgCctGcgagtctGGtatGATGCTGTGGTGTGCAGAACTACTTCAAGAGAGTAGTTCTGCACACCACAGCAGTTTTTTTGct  
cgagctggcgaattcc  
>CD\_NM\_004615.2:322  
CgCctGcgagtctGGtatGATGAACTGTATGCCATGTTTCTTCAAGAGAGAAACATGGCATAACAGTTTCAGTTTTTTTGct  
cgagctggcgaattcc  
>CD\_NM\_004615.2:789  
CgCctGcgagtctGGtatGAAATCAGTATGAGATGGTGTAAATTTCAAGAGATTACACCATCTCATACTGATTGTTTTTTGct  
cgagctggcgaattcc  
>CD\_NM\_004615.2:636  
CgCctGcgagtctGGtatGAGCCACCAAAGTTAACCAGAAGTTCAAGAGACTTCTGGTTAACTTTGGTGGCGTTTTTTGct  
cgagctggcgaattcc  
>CD\_NM\_004615.2:445  
CgCctGcgagtctGGtatGAAGACTTACAATGGCAATGATGTTCAAGAGACATCATTGCCATTGTAAGTCTGTTTTTTGct  
cgagctggcgaattcc  
>CD\_NM\_004615.2:625  
CgCctGcgagtctGGtatGATGACTGTGGCCGCCACCAAAGTTCAAGAGACTTTGGTGGCGGCCACAGTCAGTTTTTTGct  
cgagctggcgaattcc  
>CD\_NM\_004615.2:283  
CgCctGcgagtctGGtatGCTTGGATGCTTTGCTACATGTCTTCAAGAGAGACATGTAGCAAAGCATCCAAATTTTTTGct  
cgagctggcgaattcc  
>CD\_NM\_004615.2:727  
CgCctGcgagtctGGtatGCTCGCATCTCCCAGTTAATTGTTCAAGAGACAATTAAGTGGGAGAAATGCGATTTTTTTGct  
cgagctggcgaattcc  
>CD\_NM\_004615.2:345  
CgCctGcgagtctGGtatGATCCCTGGTGTTCCTGGCTGAGTTCAAGAGACTCAGCCAGGAACACCAGGGACTTTTTTGct  
cgagctggcgaattcc  
>CD\_NM\_004615.2:318  
CgCctGcgagtctGGtatGAATGCTGAACTGTATGCCATGTTCAAGAGACATGGCATAACAGTTTCAGCATTTTTTTGct  
cgagctggcgaattcc  
>CD\_NM\_004615.2:761  
CgCctGcgagtctGGtatGACTGCTGTCTGTCCCGTTTCATTTCAAGAGAATGAACGGGACAGACAGCAGTTTTTTGct  
cgagctggcgaattcc  
>CD\_NM\_004615.2:725

CgCtGcgagtctGGtatGAAATCGCATTTCTCCAGTTAATTTCAAGAGAATTAAGTGGGAGAATGCGATTCTTTTTGct  
cgagctggcgaattcc  
>CD\_NM\_004615.2:295  
CgCtGcgagtctGGtatGACTACATGTCGTGGTAGCCATTTCAAGAGAATGGGCTACCACGACATGTAGCTTTTTGct  
cgagctggcgaattcc  
>CD\_NM\_004615.2:675  
CgCtGcgagtctGGtatGCACTAGTTTCATGGAGACTTAAGTTCAGAGAGTTAGTCTCCATGAAACTAGTTTTTTGct  
cgagctggcgaattcc  
>CD\_NM\_004615.2:671  
CgCtGcgagtctGGtatGCGGTAAGTTCATGGAGACTTCAAGAGAGTCTCCATGAAACTAGTTACCATTTTTGct  
cgagctggcgaattcc  
>CD\_NM\_004615.2:752  
CgCtGcgagtctGGtatGCGCTGCTGGCCTGCTGTCTGTCTTCAAGAGAGACAGACAGCAGGCCAGCAGCATTTTTGct  
cgagctggcgaattcc  
>CD\_NM\_004615.2:524  
CgCtGcgagtctGGtatGCCTACACCAACTGGAGCACCAGTTCAAGAGACTGGTGCTCCAGTTGGTGTAGTTTTTTGct  
cgagctggcgaattcc  
>CD\_NM\_004615.2:707  
CgCtGcgagtctGGtatGCCGCTGGAGTGGCGTTTGGAAATTTCAAGAGAATCCAAACGCCACTCCAGCGATTTTTGct  
cgagctggcgaattcc  
>CD\_NM\_004615.2:77  
CgCtGcgagtctGGtatGCGGAGACCAACCTGTGATAACTTCAAGAGAGTTATCACAGGTTTGGTCTCCATTTTTGct  
cgagctggcgaattcc  
>CD\_NM\_004615.2:239  
CgCtGcgagtctGGtatGCTGTGCTCATCGGAAGTGGCACTTCAAGAGAGTGCCAGTTCCGATGAGCACATTTTTGct  
cgagctggcgaattcc  
>CD\_NM\_004615.2:629  
CgCtGcgagtctGGtatGATGTGGCCGCCACCAAGTTAATTTCAAGAGATTAAGTGGTGGCGGCCACAGTTTTTTGct  
cgagctggcgaattcc  
>CD\_NM\_005761:4523  
CgCtGcgagtctGGtatGCCCTCAGTTTGTCTTTGACATTTCAAGAGAATGTCAAAGACAAACTGAGGGTTTTTTGct  
cgagctggcgaattcc  
>CD\_NM\_005761:1460  
CgCtGcgagtctGGtatGCTGGTGAGAATTTGACTTCAAATTTCAAGAGATTTGAAGTCAAATTTCTACCAATTTTTGct  
cgagctggcgaattcc  
>CD\_NM\_005761:4115  
CgCtGcgagtctGGtatGCTGGCCACTATGAGATATCAAATTTCAAGAGATTTGATATCTCATAGTGGCCAATTTTTGct  
cgagctggcgaattcc  
>CD\_NM\_005761:1224  
CgCtGcgagtctGGtatGAACGGCGCTCTGCCTCTTCAGATTCAAGAGATCTGAAGAGGCAGAGCGCCGTTTTTTTGct  
cgagctggcgaattcc  
>CD\_NM\_005761:2538  
CgCtGcgagtctGGtatGAACCTGGATCAGTGGTGGTCAATTTCAAGAGATGACCACCACTGATCCAGGTGTTTTTTGct  
cgagctggcgaattcc  
>CD\_NM\_005761:1977  
CgCtGcgagtctGGtatGATCCTTCGGTCTTGGAAATTTATTCAAGAGATAAATTTCAAGAACCGAAGGAGTTTTTTGct  
cgagctggcgaattcc  
>CD\_NM\_005761:1484  
CgCtGcgagtctGGtatGATCCAGAGGTTATCTATGAAATTTCAAGAGAATTTATAGATAACCTCTGGACTTTTTTTGct  
cgagctggcgaattcc  
>CD\_NM\_005761.1:3502  
CgCtGcgagtctGGtatGATCTGTTTGCCTCTTCCCTCAACTTCAAGAGAGTTAGGAAGGAGGCAAACAGACTTTTTTTGct  
cgagctggcgaattcc  
>CD\_NM\_005761.1:4115

CgCctGcgagtctGGtatGCGGCCACTATGAGATATCAAATTTCAAGAGAATTTGATATCTCATAGTGGCCATTTTTGct  
cgagctggcgaattcc  
>CD\_NM\_005761.1:1460  
CgCctGcgagtctGGtatGCGGTGAGAATTTGACTTCAAATTTCAAGAGAATTTGAAGTCAAATTTCCACCATTTTTGct  
cgagctggcgaattcc  
>CD\_NM\_005761.1:1837  
CgCctGcgagtctGGtatGAACACTCAAAGTGCATGGTGAATTTCAAGAGATTCACCATGCACTTTGAGTGTCTTTTTGct  
cgagctggcgaattcc  
>CD\_NM\_005761.1:1538  
CgCctGcgagtctGGtatGCCCTGATCCTGTGAAGAATATCTTCAAGAGAGATATCTTTCACAGGATCAGGATTTTTGct  
cgagctggcgaattcc  
>CD\_NM\_005761.1:4525  
CgCctGcgagtctGGtatGATCAGTTTGTCTTTGACATTAATTTCAAGAGATTAATGTCAAAGACAAACTGAGTTTTGct  
cgagctggcgaattcc  
>CD\_NM\_005761.1:2714  
CgCctGcgagtctGGtatGAACTGTGAAGCTGAGAGTACAATTTCAAGAGATTGTACTCTCAGCTTCACAGTGTTTTTGct  
cgagctggcgaattcc  
>CD\_NM\_005761.1:4523  
CgCctGcgagtctGGtatGACCTCAGTTTGTCTTTGACATTTTTCAAGAGAAATGTCAAAGACAAACTGAGGGTTTTGct  
cgagctggcgaattcc  
>CD\_NM\_005761.1:2403  
CgCctGcgagtctGGtatGCTGAAATTTCTCTTCCATCAAATTTCAAGAGATTGATGGAAGAGAGAATTTCATTTTGct  
cgagctggcgaattcc  
>CD\_NM\_005761.1:1774  
CgCctGcgagtctGGtatGCTCAGATAAATTCGAAGCAGTAATTTCAAGAGATTACTGCTTCGAATTATCTGAATTTTTGct  
cgagctggcgaattcc  
>CD\_NM\_005761.1:4235  
CgCctGcgagtctGGtatGCTTCCAAGATGTGCAAGGAAAGTTCAAGAGACTTTCCTTGCACATCTTGAATTTTTGct  
cgagctggcgaattcc  
>CD\_NM\_005761.1:3171  
CgCctGcgagtctGGtatGAGCAAACAGAGTCAACAAGTCAAGAGACTAGTTGTTGACTCTGTTGCGTTTTGct  
cgagctggcgaattcc  
>CD\_NM\_005761.1:955  
CgCctGcgagtctGGtatGCCGCTTCTCTGGAACGGCAGTTCAAGAGACTGCCGTTCCAGAGAAAGCGTTTTGct  
cgagctggcgaattcc  
>CD\_NM\_005761.1:2507  
CgCctGcgagtctGGtatGACCACATTGTTCCCTTATATTTTTCAAGAGAAAATATAAGGGAACAATGTGGCTTTTTGct  
cgagctggcgaattcc  
>CD\_NM\_005761.1:2346  
CgCctGcgagtctGGtatGCCAGTACCTGTGATAAGGATGTTCAAGAGACATCCTTATCACAGGTACTGGTTTTGct  
cgagctggcgaattcc  
>CD\_NM\_005761.1:3281  
CgCctGcgagtctGGtatGCACTGTTCCCTTCCCTTACTACTTCAAGAGAGTAGTCAAGGAAGGGAACAGTTTTGct  
cgagctggcgaattcc  
>CD\_NM\_005761.1:1966  
CgCctGcgagtctGGtatGCCGTGATGTTCTCCTTCGGTTCTTCAAGAGAGAACCGAAGGAGAACATCACGTTTTGct  
cgagctggcgaattcc  
>CD\_NM\_005761.1:1228  
CgCctGcgagtctGGtatGAGCTCTGCCCTTTCAGAATGAGTTCAAGAGACTCATTCTGAAGAGGCAGAGCGTTTTGct  
cgagctggcgaattcc  
>CD\_NM\_005761.1:2375  
CgCctGcgagtctGGtatGAGTTAGCCATGTGCTAAATGACTTCAAGAGAGTCATTTAGCACATGGCTAACCTTTTTGct  
cgagctggcgaattcc  
>CD\_NM\_005761.1:4731

CgCctGcgagtctGGtatGCTGTCATCCTCAGAAATGGAAGTTCAAGAGACTTCCATTTCTGAGGATGACAATTTTTTGct  
cgagctggcgaattcc  
>CD\_NM\_005761.1:2503  
CgCctGcgagtctGGtatGATCTGCCACATTTGTTCCCTTATTTCAAGAGAATAAGGGAACAATGTGGCAGAGTTTTTGct  
cgagctggcgaattcc  
>CD\_NM\_005761.1:2702  
CgCctGcgagtctGGtatGACGCACGAATGTCACCTGTGAAGTTCAAGAGACTTACAGTGACATTCGTGCGCTTTTTTGct  
cgagctggcgaattcc  
>CD\_NM\_005761.1:1336  
CgCctGcgagtctGGtatGCCCAACCAATCGCATCATCTACTTCAAGAGAGTAGATGATGCGATTGGTTGGATTTTTTGct  
cgagctggcgaattcc  
>CD\_NM\_005761.1:4881  
CgCctGcgagtctGGtatGATGGAAGAAGCTCAGAAACAACCTTCAAGAGAGTTGTTTCTGAGCTTCTTCCAGTTTTTGct  
cgagctggcgaattcc  
>CD\_NM\_005761.1:1430  
CgCctGcgagtctGGtatGCGGAGATGGCCAGTTACTTAAGTTCAAGAGACTTAAGTAACTGGCCATCTCCATTTTTTGct  
cgagctggcgaattcc  
>CD\_NM\_005761.1:3995  
CgCctGcgagtctGGtatGCGGACTTCAGCTTAATGAAATTTTCAAGAGAAATTTTCAATTAAGCTGAAGTCCATTTTTTGct  
cgagctggcgaattcc  
>CD\_NM\_000342:240  
CgCctGcgagtctGGtatGCGCCACAGACTACCACACCACATTTCAAGAGATGTGGTGTGGTAGTCTGTGGCTTTTTTGct  
cgagctggcgaattcc  
>CD\_NM\_000342:266  
CgCctGcgagtctGGtatGCCCCGGGTACCCACAAGGTCTATTCAAGAGATAGACCTTGTGGGTACCCGGGTTTTTTGct  
cgagctggcgaattcc  
>CD\_NM\_000342:889  
CgCctGcgagtctGGtatGACGGTGCCTATACGCTTCTTCTTTCAAGAGAAGAGGAAGCGTATAGGCACCGTTTTTGct  
cgagctggcgaattcc  
>CD\_NM\_000342:1675  
CgCctGcgagtctGGtatGAAGGAGATCTTCTCCTTCTCATTCAAGAGATGAGGAAGGAGAAGATCTCCTGTTTTTGct  
cgagctggcgaattcc  
>CD\_NM\_000342:1849  
CgCctGcgagtctGGtatGACCGGTACCTTCTTCTTTGCCATTTCAAGAGATGGCAAAGAAGAAGGTACCGCTTTTTTGct  
cgagctggcgaattcc  
>CD\_NM\_000342:2321  
CgCctGcgagtctGGtatGCCGCCCTCACTGTCATGGGCAATTTCAAGAGATTGCCCATGACAGTGAGGGCGTTTTTGct  
cgagctggcgaattcc  
>CD\_NM\_000342:2363  
CgCctGcgagtctGGtatGAAGCCCAGATCCAGGAGGTCAATTTCAAGAGATTGACCTCCTGGATCTGGGCTGTTTTTGct  
cgagctggcgaattcc  
>CD\_NM\_000342.1:2321  
CgCctGcgagtctGGtatGAGCCCTCACTGTCATGGGCAATTTCAAGAGATTTGCCCATGACAGTGAGGGCGTTTTTGct  
cgagctggcgaattcc  
>CD\_NM\_000342.1:1714  
CgCctGcgagtctGGtatGCTGAGACTTCTCCAAGCTGATTTCAAGAGAATCAGCTTGGAGAAAGTCTCATTTTTTGct  
cgagctggcgaattcc  
>CD\_NM\_000342.1:1675  
CgCctGcgagtctGGtatGCGGAGATCTTCTCCTTCTCATTTTCAAGAGAATGAGGAAGGAGAAGATCTCCTTTTTTGct  
cgagctggcgaattcc  
>CD\_NM\_000342.1:1651  
CgCctGcgagtctGGtatGCCCGCTTCATCTCCCGCTATACTTCAAGAGAGTATAGCGGGAGATGAAGCGGATTTTTTGct  
cgagctggcgaattcc  
>CD\_NM\_000342.1:272

CgCctGcgagtctGGtatGCACCCACAAGGTCATGTGGAGTTCAAGAGACTCCACATAGACCTTGTGGGTATTTTTGct  
cgagctggcgaattcc  
>CD\_NM\_000342.1:2759  
CgCctGcgagtctGGtatGACTTCAGTGTCTGGATGCTGATTTCAAGAGAATCAGCATCCAGACACTGAAGCTTTTTGct  
cgagctggcgaattcc  
>CD\_NM\_000342.1:965  
CgCctGcgagtctGGtatGCGCTGCCACCCTCATGTCAGAGTTCAAGAGACTCTGACATGAGGGTGGCAGCATTTTTTGct  
cgagctggcgaattcc  
>CD\_NM\_000342.1:1697  
CgCctGcgagtctGGtatGCTCCCTCATCTTCATCTATGAGTTCAAGAGACTCATAGATGAAGATGAGGGAATTTTTGct  
cgagctggcgaattcc  
>CD\_NM\_000342.1:980  
CgCctGcgagtctGGtatGATCAGAGAGGGTGTCCGCATATTCAAGAGATATGCGGAACACCCCTCTCTGACTTTTTGct  
cgagctggcgaattcc  
>CD\_NM\_000342.1:353  
CgCctGcgagtctGGtatGATGGGTGCAACTGGAGGAGAACTTCAAGAGAGTTCTCCTCCAGTTGCACCCAGTTTTGct  
cgagctggcgaattcc  
>CD\_NM\_000342.1:120  
CgCctGcgagtctGGtatGAAGCTGCAGGATGATTATGAAGTTCAAGAGACTTCATAATCATCCTGCAGCTTTTTGct  
cgagctggcgaattcc  
>CD\_NM\_000342.1:2419  
CgCctGcgagtctGGtatGCTGTGGGCCCTGTCCATCCTCATTTCAAGAGAATGAGGATGGACAGGCCCAATTTTTGct  
cgagctggcgaattcc  
>CD\_NM\_000342.1:1967  
CgCctGcgagtctGGtatGACTGGTGGATTTCTTCATTCAGTTCAAGAGACTGAATGAAGAAATCCACCAGTTTTGct  
cgagctggcgaattcc  
>CD\_NM\_000342.1:2763  
CgCctGcgagtctGGtatGAAGTGTCTGGATGCTGATGATGTTCAAGAGACATCATCAGCATCCAGACACTGTTTTGct  
cgagctggcgaattcc  
>CD\_NM\_000342.1:572  
CgCctGcgagtctGGtatGACTCCGGGCCCTGCTGCTTAAATTCAGAGATTTAAGCAGCAGGGCCCGGAGTTTTGct  
cgagctggcgaattcc  
>CD\_NM\_000342.1:2125  
CgCctGcgagtctGGtatGATCTGCTGGTCTTCATCCTCATTTCAAGAGAATGAGGATGAAGACCAGCAGAGTTTTGct  
cgagctggcgaattcc  
>CD\_NM\_000342.1:2369  
CgCctGcgagtctGGtatGAATCCAGGAGGTCAAAGAGCAGTTCAAGAGACTGCTCTTTGACCTCCTGGATTTTTGct  
cgagctggcgaattcc  
>CD\_NM\_000342.1:1873  
CgCctGcgagtctGGtatGCGCTGCGCAAGTTCAAGAACAGTTCAAGAGACTGTTCTTGAACCTTGCGCAGCATTTTTTGct  
cgagctggcgaattcc  
>CD\_NM\_000342.1:2423  
CgCctGcgagtctGGtatGAGGCCTGTCCATCCTCATGGAGTTCAAGAGACTCCATGAGGATGGACAGGCCCTTTTTGct  
cgagctggcgaattcc  
>CD\_NM\_000342.1:2166  
CgCctGcgagtctGGtatGCCCACGCTGATTGTCAGCAAACCTTCAAGAGAGTTTGGCTGACAATCAGCGTGGTTTTGct  
cgagctggcgaattcc  
>CD\_NM\_000342.1:440  
CgCctGcgagtctGGtatGACTGCGTAGAGTCTTACCAAGTTCAAGAGACTTGGTGAAGACTCTACGCAGTTTTGct  
cgagctggcgaattcc  
>CD\_NM\_000342.1:829  
CgCctGcgagtctGGtatGCGCCGGTGTGGGCTTCGTGAGTTCAAGAGACTCACGAAGCCCAGCACCGGTTTTGct  
cgagctggcgaattcc  
>CD\_NM\_000342.1:518

CgCtGcgagtctGGtatGACTAGACAGGTTTATCTTTGAATTCAAGAGATTCAAAGATAAACCTGTCTAGCTTTTTTGct  
cgagctggcgaattcc  
>CD\_NM\_000342.1:575  
CgCtGcgagtctGGtatGACGGGCCCTGCTGCTTAAACACTTCAAGAGAGTGTTTAAGCAGCAGGGCCCGTTTTTGct  
cgagctggcgaattcc  
>CD\_NM\_000342.1:2062  
CgCtGcgagtctGGtatGCCACCCACTGGGCTTGCCTTCAAGAGAGAACGCAAGCCCAGTGGGTGGATTTTTTGct  
cgagctggcgaattcc  
>CD\_NM\_000342.1:1699  
CgCtGcgagtctGGtatGACCTCATCTTCATCTATGAGACTTCAAGAGAGTCTCATAGATGAAGATGAGGGTTTTTGct  
cgagctggcgaattcc  
>CD\_NM\_002036:550  
CgCtGcgagtctGGtatGATGGGCAGTGCCCTCTCAGCATTCAAGAGATGCTGAAGAGGGCACTGCCACTTTTTTGct  
cgagctggcgaattcc  
>CD\_NM\_002036:551  
CgCtGcgagtctGGtatGCGGGCAGTGCCCTCTCAGCATTCAAGAGAATGCTGAAGAGGGCACTGCCACTTTTTTGct  
cgagctggcgaattcc  
>CD\_NM\_002036:628  
CgCtGcgagtctGGtatGCGCCTGGGCTACTGTGTCTGGTTTTCAAGAGAACCAGACACAGTAGCCCAGGTTTTTGct  
cgagctggcgaattcc  
>CD\_NM\_002036:928  
CgCtGcgagtctGGtatGAGGCTGAAGAAGGCATTGGGTATTCAAGAGATACCCAATGCCTTCTTCAGCCTTTTTGct  
cgagctggcgaattcc  
>CD\_NM\_002036:1099  
CgCtGcgagtctGGtatGCACCTGGCAGAAGCCCTGGCAATTCAAGAGATTGCCAGGGCTTCTGCCAGGTTTTTTTGct  
cgagctggcgaattcc  
>CD\_NM\_002036.2:1079  
CgCtGcgagtctGGtatGAGCTCTGGACCTGCTGCTGAACTTCAAGAGAGTTCAGCAGCAGGTCCAGAGCTTTTTGct  
cgagctggcgaattcc  
>CD\_NM\_002036.2:395  
CgCtGcgagtctGGtatGATCCTGTAACCTGCTGGATGACTTCAAGAGAGTCATCCAGCAGGTTACAGGAGTTTTTGct  
cgagctggcgaattcc  
>CD\_NM\_002036.2:815  
CgCtGcgagtctGGtatGCGGACTCTGCACCCTGATATACTTCAAGAGAGTATATCAGGGTGCAGAGTCCACTTTTTTGct  
cgagctggcgaattcc  
>CD\_NM\_002036.2:617  
CgCtGcgagtctGGtatGCGCCCTGTGTAGCCTGGGCTACTTCAAGAGAGTAGCCCAGGCTACACAGGGCATTTTTTTGct  
cgagctggcgaattcc  
>CD\_NM\_002036.2:1045  
CgCtGcgagtctGGtatGCGCTGTTGCTGTTGTCAACATGTTCAAGAGACATGTTGACAACAGCAACAGCTTTTTTGct  
cgagctggcgaattcc  
>CD\_NM\_002036.2:636  
CgCtGcgagtctGGtatGCACTGTGTCTGGTATGGCTCAGTTCAAGAGACTGAGCCATAACCAGACACAGTATTTTTTGct  
cgagctggcgaattcc  
>CD\_NM\_002036.2:634  
CgCtGcgagtctGGtatGACTACTGTGTCTGGTATGGCTCTTCAAGAGAGAGCCATAACCAGACACAGTAGCTTTTTTGct  
cgagctggcgaattcc  
>CD\_NM\_002036.2:318  
CgCtGcgagtctGGtatGCATTCTTCCATGGTGTGAATGTTCAAGAGACATTCACACCATAGGAAGAATTTTTTGct  
cgagctggcgaattcc  
>CD\_NM\_002036.2:630  
CgCtGcgagtctGGtatGATGGGCTACTGTGTCTGGTATGTTCAAGAGACATACCAGACACAGTAGCCCAGTTTTTGct  
cgagctggcgaattcc  
>CD\_NM\_002036.2:861

CgCctGcgagtctGGtatGACCACACACACTGTAGCCTGTCTTCAAGAGAGACAGGCTACAGTGTGTGGCTTTTTGct  
cgagctggcgaattcc  
>CD\_NM\_002036.2:928  
CgCctGcgagtctGGtatGAGCTGAAGAAGGCATTGGGTATTTCAAGAGAATACCCAATGCCTTCTTCAGCCTTTTTGct  
cgagctggcgaattcc  
>CD\_NM\_002036.2:441  
CgCctGcgagtctGGtatGCCAGTGTCCCTGGGTATCCTAGTTCAAGAGACTAGGATACCCAGGACACTGGTTTTTTGct  
cgagctggcgaattcc  
>CD\_NM\_002036.2:437  
CgCctGcgagtctGGtatGACTCACAGTGTCCCTGGGTATCTTCAAGAGAGATACCCAGGACACTGGTGAGTTTTTTGct  
cgagctggcgaattcc  
>CD\_NM\_002036.2:1030  
CgCctGcgagtctGGtatGCCCTGGTGAGGTCCAAGCTGTTTTCAAGAGAAACAGCTTGGACCTCACAGGATTTTTGct  
cgagctggcgaattcc  
>CD\_NM\_002036.2:421  
CgCctGcgagtctGGtatGAACTGCCCTTCTTCATCCTCACTTCAAGAGAGTGAGGATGAAGAAGGGCAGTTTTTTGct  
cgagctggcgaattcc  
>CD\_NM\_002036.2:892  
CgCctGcgagtctGGtatGCTGTCTTGTGCCATTGGGTTTTTCAAGAGAAAACCCAATGGCAACAAGACAATTTTTGct  
cgagctggcgaattcc  
>CD\_NM\_002036.2:878  
CgCctGcgagtctGGtatGATGTCTTGCCATCTTTGTCTTGTTCAGAGACAAGACAAAGATGGCAAGACAGTTTTTTGct  
cgagctggcgaattcc  
>CD\_NM\_002036.2:464  
CgCctGcgagtctGGtatGCAGCAGCACTGTCCTTTCATGTTCAAGAGACATGAAGAGGACAGTGCTGCTATTTTTGct  
cgagctggcgaattcc  
>CD\_NM\_002036.2:521  
CgCctGcgagtctGGtatGCGGCTGGCCTGTCCTGGCACAGTTCAAGAGACTGTGCCAGGACAGGCCAGCCATTTTTGct  
cgagctggcgaattcc  
>CD\_NM\_002036.2:798  
CgCctGcgagtctGGtatGACCAGTGGTGCTTCTGGTGGACTTCAAGAGAGTCCACCAGAAGCACCCTGGCTTTTTGct  
cgagctggcgaattcc  
>CD\_NM\_002036.2:300  
CgCctGcgagtctGGtatGAACTTCGAAGATGTATGGAATTTTTCAAGAGAAATCCATACATCTTCGAAGTCTTTTTGct  
cgagctggcgaattcc  
>CD\_NM\_002036.2:811  
CgCctGcgagtctGGtatGATGGTGGACTCTGCACCCTGATTTCAAGAGAATCAGGGTGCAGAGTCCACCAGTTTTTTGct  
cgagctggcgaattcc  
>CD\_NM\_002036.2:1229  
CgCctGcgagtctGGtatGAACCTTGAAGCAAATCCTAGTTCAAGAGACTAGGATTTGCTTCCAAGGGTGTTTTTGct  
cgagctggcgaattcc  
>CD\_NM\_002036.2:1225  
CgCctGcgagtctGGtatGCGGACACCCTTGAAGCAAATCTTCAAGAGAGATTTGCTTCCAAGGGTGTCCATTTTTGct  
cgagctggcgaattcc  
>CD\_NM\_002036.2:320  
CgCctGcgagtctGGtatGCTCTTCCATGGTGTGAATGATTTCAAGAGAATCATTCACACCATAGGAAGAATTTTTGct  
cgagctggcgaattcc  
>CD\_NM\_002036.2:900  
CgCctGcgagtctGGtatGCTGCCATTGGGTTTTGTTTGGAGTTCAAGAGACTCCAAACAAACCCAATGGCAATTTTTGct  
cgagctggcgaattcc  
>CD\_NM\_002036.2:836  
CgCctGcgagtctGGtatGAAGCACGGAGCTGAAGGCTTTGTTCAAGAGACAAGCCTTCAGCTCCGTGCTTTTTTTGct  
cgagctggcgaattcc  
>CD\_NM\_002036.2:653

CgCctGcgagtctGGtatGATCAGCCTTTGCCAGGCTTTGTTCAAGAGACAAAGCCTGGGCAAAGGCTGAGTTTTTtGct  
cgagctggcgaattcc  
>CD\_NM\_002099.375  
CgCctGcgagtctGGtatGCTCCTCTTAATTTCTTACGGTATTCAAGAGATACCGTAAGAAATTAAGAGGATTTTTTtGct  
cgagctggcgaattcc  
>CD\_NM\_002099.459  
CgCctGcgagtctGGtatGATGCCTTTAAGTTCGTGTTGAAATTTCAAGAGATTTCAACAGAACTTAAAGGCATTTTTTtGct  
cgagctggcgaattcc  
>CD\_NM\_002100.75  
CgCctGcgagtctGGtatGCTTGTATTACTATTGTCAGAAATTTCAAGAGATTTCTGACAATAGTAATACAAATTTTTTtGct  
cgagctggcgaattcc  
>CD\_NM\_002099.3.375  
CgCctGcgagtctGGtatGCCCTCTTAATTTCTTACGGTATTTCAAGAGAATACCGTAAGAAATTAAGAGGATTTTTTtGct  
cgagctggcgaattcc  
>CD\_NM\_002099.3.96  
CgCctGcgagtctGGtatGCTGTGAGCATATCAGCATTAAAGTTCAAGAGACTTAATGCTGATATGCTCACAATTTTTTtGct  
cgagctggcgaattcc  
>CD\_NM\_002099.3.458  
CgCctGcgagtctGGtatGATGCCTTTAAGTTCGTGTTGAAATTTCAAGAGATTTCAACAGAACTTAAAGGCATTTTTTtGct  
cgagctggcgaattcc  
>CD\_NM\_002099.3.137  
CgCctGcgagtctGGtatGAACACTTCAACTTCTTCTTCAGTTCAAGAGACTGAAGAAGAAGTTGAAGTGTGTTTTTtGct  
cgagctggcgaattcc  
>CD\_NM\_002099.3.86  
CgCctGcgagtctGGtatGCTGTCAGAAATTTGTGAGCATATTTCAAGAGAATATGCTCACAATTTCTGACAATTTTTTtGct  
cgagctggcgaattcc  
>CD\_NM\_002099.3.394  
CgCctGcgagtctGGtatGCATTGCGGACTGATAAAGAAATTTCAAGAGATTTCTTTATCAGTCGGCGAATTTTTTtGct  
cgagctggcgaattcc  
>CD\_NM\_002099.3.75  
CgCctGcgagtctGGtatGCTGTATTACTATTGTCAGAAATTTCAAGAGAATTTCTGACAATAGTAATACAATTTTTTtGct  
cgagctggcgaattcc  
>CD\_NM\_002099.3.193  
CgCctGcgagtctGGtatGCACGCACAAACGGGACACATATTTCAAGAGAATATGTGTCCCGTTTGTGCGTATTTTTTtGct  
cgagctggcgaattcc  
>CD\_NM\_002099.3.239  
CgCctGcgagtctGGtatGATTTTCAGAAATTTCTGTTAGAATTTCAAGAGATTTCAACAGAATTTCTGAAACTTTTTTtGct  
cgagctggcgaattcc  
>CD\_NM\_002099.3.459  
CgCctGcgagtctGGtatGCGCCTTTAAGTTCGTGTTGAAATTTCAAGAGAATTTCAACAGAACTTAAAGGCATTTTTTtGct  
cgagctggcgaattcc  
>CD\_NM\_002099.3.229  
CgCctGcgagtctGGtatGCGCTCATGAAGTTTCAGAAATTTTCAAGAGAAATTTCTGAAACTTCATGAGCTTTTTTtGct  
cgagctggcgaattcc  
>CD\_NM\_002099.3.314  
CgCctGcgagtctGGtatGCTCTCTGAACCAGAGATAACACTTCAAGAGAGTGTATCTCTGGTTCAGAGAATTTTTTtGct  
cgagctggcgaattcc  
>CD\_NM\_002099.3.218  
CgCctGcgagtctGGtatGACCACTCCTAGAGCTCATGAAGTTCAAGAGACTTCATGAGCTCTAGGAGTGGCTTTTTTtGct  
cgagctggcgaattcc  
>CD\_NM\_002099.3.156  
CgCctGcgagtctGGtatGAAGTCACAAAGAGTTACATCTCTTCAAGAGAGAGATGTAACCTTTTGTGACTGTTTTTtGct  
cgagctggcgaattcc  
>CD\_NM\_002099.3.463



CgCctGcgagtctGGtatGCTTAAGTCTGTTGAAATAGAATTCAAGAGATTCTATTTCAACAGAACTTAAATTTTTGct  
cgagctggcgaattcc  
>CD\_NM\_002099.3:168  
CgCctGcgagtctGGtatGATTACATCTCATCACAGACAAATTCAGAGATTTGTCTGTGATGAGATGTAACTTTTTgct  
cgagctggcgaattcc  
>CD\_NM\_002099.3:158  
CgCctGcgagtctGGtatGATCACAAAGAGTTACATCTCATTTCAAGAGAATGAGATGTAACCTTTGTGACTTTTTGct  
cgagctggcgaattcc  
>CD\_NM\_002099.3:224  
CgCctGcgagtctGGtatGACTAGAGCTCATGAAGTTTCAGTTCAAGAGACTGAAACTTCATGAGCTCTAGGTTTTTgct  
cgagctggcgaattcc  
>CD\_NM\_002099.3:312  
CgCctGcgagtctGGtatGCTTTCTCTGAACCAGAGATAACTTCAAGAGAGTTATCTCTGGTTCAGAGAAATTTTTGct  
cgagctggcgaattcc  
>CD\_NM\_002099.3:445  
CgCctGcgagtctGGtatGCCCTGACACAGACGTGCCTTTATTCAAGAGATAAAGGCACGTCTGTGTCAGGTTTTTgct  
cgagctggcgaattcc  
>CD\_NM\_002099.3:71  
CgCctGcgagtctGGtatGCTCTTTGTATTACTATTGTTCAGTTCAAGAGACTGACAATAGTAATACAAAGATTTTTTgct  
cgagctggcgaattcc  
>CD\_NM\_002099.3:259  
CgCctGcgagtctGGtatGCACTGTTTACCCTCCAGAAGAGTTCAAGAGACTCTTCTGGAGGGTAAACAGTTTTTTGct  
cgagctggcgaattcc  
>CD\_NM\_002099.3:366  
CgCctGcgagtctGGtatGCTGGAACGATCCTCTTAATTTCTTCAAGAGAGAAATTAAGAGGATCGTTCCAATTTTTGct  
cgagctggcgaattcc  
>CD\_NM\_002099.3:390  
CgCctGcgagtctGGtatGCCGGTATTCGCCGACTGATAAATTCAGAGATTTATCAGTCGGCGAATACCGTTTTTTGct  
cgagctggcgaattcc  
>CD\_NM\_002099.3:449  
CgCctGcgagtctGGtatGAACACAGACGTGCCTTTAAGTTTTCAAGAGAACTTAAAGGCACGTCTGTGCTTTTTTgct  
cgagctggcgaattcc  
>CD\_NM\_002099.3:284  
CgCctGcgagtctGGtatGCCCGGAGAAAGGGTACAACCTGTTCAAGAGACAAGTTGTACCCTTTCTCCGGTTTTTTGct  
cgagctggcgaattcc  
>CD\_NM\_002099.3:174  
CgCctGcgagtctGGtatGCCTCATCACAGACAAATGATACTTCAAGAGAGTATCATTTGTCTGTGATGAGATTTTTGct  
cgagctggcgaattcc  
>CD\_NM\_002099.3:221  
CgCctGcgagtctGGtatGCCTCCTAGAGCTCATGAAGTTTTTCAAGAGAAACTTCATGAGCTCTAGGAGTTTTTTGct  
cgagctggcgaattcc  
>CD\_NM\_002099.3:464  
CgCctGcgagtctGGtatGCTAAGTTCTGTTGAAATAGAAATTCAGAGATTTCTATTTCAACAGAACTTAAATTTTTGct  
cgagctggcgaattcc  
>CD\_NM\_002099.3:214  
CgCctGcgagtctGGtatGCGCAGCCACTCCTAGAGCTCATTTCAAGAGAATGAGCTCTAGGAGTGGCTGCATTTTTGct  
cgagctggcgaattcc  
>CD\_NM\_002100:199  
CgCctGcgagtctGGtatGAGGGACAACTTGTCCATCGTTTTTCAAGAGAAAACGATGGACAAGTTGTCCGTTTTTTGct  
cgagctggcgaattcc  
>CD\_NM\_002100:226  
CgCctGcgagtctGGtatGCACCAGCTCCTGTAGTGATAATTTCAAGAGAATTATCACTACAGGAGCTGGTATTTTTGct  
cgagctggcgaattcc  
>CD\_NM\_002100:257

CgCctGcgagtctGGtatGCTTGTGTGTGATGGCTGGTATTTTCAAGAGAAATACCAGCCATCACACACAAATTTTTGct  
cgagctggcgaattcc  
>CD\_NM\_002100:234  
CgCctGcgagtctGGtatGACTGTAGTGATAATACTCATTATTCAAGAGATAATGAGTATTATCACTACAGTTTTTgct  
cgagctggcgaattcc  
>CD\_NM\_002100:229  
CgCctGcgagtctGGtatGAAGCTCCTGTAGTGATAATACTTTCAAGAGAAGTATTATCACTACAGGAGCTGTTTTTgct  
cgagctggcgaattcc  
>CD\_NM\_002100:232  
CgCctGcgagtctGGtatGATCCTGTAGTGATAATACTCATTTC AAGAGAATGAGTATTATCACTACAGGAGTTTTTgct  
cgagctggcgaattcc  
>CD\_NM\_002100.3:288  
CgCctGcgagtctGGtatGCCCTCTTAATTTCTTACAGTATTTCAAGAGAATACTGTAAGAAATTAAGAGGATTTTTGct  
cgagctggcgaattcc  
>CD\_NM\_002100.3:96  
CgCctGcgagtctGGtatGCTGTGAGCATATCAGCATTAAAGTTCAAGAGACTTAATGCTGATATGCTCACAATTTTTGct  
cgagctggcgaattcc  
>CD\_NM\_002100.3:86  
CgCctGcgagtctGGtatGCTGTCAGAAATTGTGAGCATATTTCAAGAGAATATGCTCACAATTTCTGACAATTTTTGct  
cgagctggcgaattcc  
>CD\_NM\_002100.3:75  
CgCctGcgagtctGGtatGCTGTATTACTATTGTCAGAAATTTCAAGAGAATTTCTGACAATAGTAATACAATTTTTGct  
cgagctggcgaattcc  
>CD\_NM\_002100.3:218  
CgCctGcgagtctGGtatGCTCACTGTACCAGCTCCTGTAGTTCAAGAGACTACAGGAGCTGGTACAGTGAATTTTTGct  
cgagctggcgaattcc  
>CD\_NM\_002100.3:229  
CgCctGcgagtctGGtatGCGCTCCTGTAGTGATAATACTCTTCAAGAGAGAGTATTATCACTACAGGAGCTTTTTTgct  
cgagctggcgaattcc  
>CD\_NM\_002100.3:137  
CgCctGcgagtctGGtatGAACACTTCAACCTCTTCTTCAAGAGACTGAAGAAGAGGTTGAAGTGTGTTTTTgct  
cgagctggcgaattcc  
>CD\_NM\_002100.3:199  
CgCctGcgagtctGGtatGAGGACAACCTGTCATCGTTTTCTTCAAGAGAGAAACGATGGACAAGTTGTCCTTTTTTgct  
cgagctggcgaattcc  
>CD\_NM\_002100.3:156  
CgCctGcgagtctGGtatGAAGTCACAAAGAGTTACATCTCTTCAAGAGAGAGATGTAACCTTTGTGACTGTTTTTgct  
cgagctggcgaattcc  
>CD\_NM\_002100.3:226  
CgCctGcgagtctGGtatGCCAGCTCCTGTAGTGATAATATTCAAGAGATATTATCACTACAGGAGCTGGTTTTTgct  
cgagctggcgaattcc  
>CD\_NM\_002100.3:168  
CgCctGcgagtctGGtatGATTACATCTCATCACAGACAAATTCAAGAGATTTGTCTGTGATGAGATGTAACTTTTTgct  
cgagctggcgaattcc  
>CD\_NM\_002100.3:158  
CgCctGcgagtctGGtatGATCACAAAGAGTTACATCTCATTTC AAGAGAATGAGATGTAACCTTTGTGACTTTTTTgct  
cgagctggcgaattcc  
>CD\_NM\_002100.3:257  
CgCctGcgagtctGGtatGCTGTGTGTGATGGCTGGTATTTTCAAGAGATAATACCAGCCATCACACACAATTTTTGct  
cgagctggcgaattcc  
>CD\_NM\_002100.3:71  
CgCctGcgagtctGGtatGCTCTTTGTATTACTATTGTCAGTTCAAGAGACTGACAATAGTAATACAAAGATTTTTTgct  
cgagctggcgaattcc  
>CD\_NM\_002100.3:279

CgCctGcgagtctGGtatGCTGGAACGATCCTCTTAATTTCTTCAAGAGAGAAATTAAGAGGATCGTTCCAATTTTTGct  
cgagctggcgaattcc  
>CD\_NM\_002100.3:300  
CgCctGcgagtctGGtatGATTACAGTATTCGCCGACTGATTTCAAGAGAATCAGTCGGCGAATACTGTAAGTTTTGct  
cgagctggcgaattcc  
>CD\_NM\_002100.3:287  
CgCctGcgagtctGGtatGCTCCTCTTAATTTCTTACAGTATTTCAAGAGATACTGTAAGAAATTAAGAGGATTTTTGct  
cgagctggcgaattcc  
>CD\_NM\_002100.3:170  
CgCctGcgagtctGGtatGCACATCTCATCACAGACAAATGTTCAAGAGACATTTGTCTGTGATGAGATGTATTTTTGct  
cgagctggcgaattcc  
>CD\_NM\_002100.3:268  
CgCctGcgagtctGGtatGAGCTGGTATTATTGGAACGATCTTCAAGAGAGATCGTTCCAATAATACCAGCCTTTTTGct  
cgagctggcgaattcc  
>CD\_NM\_002100.3:224  
CgCctGcgagtctGGtatGATACCAGCTCCTGTAGTGATAATTCAAGAGATTATCACTACAGGAGCTGGTACTTTTTGct  
cgagctggcgaattcc  
>CD\_NM\_002100.3:118  
CgCctGcgagtctGGtatGCACCACTGAGGTGGCAATGCACTTCAAGAGAGTGCATTGCCACCTCAGTGGTATTTTTGct  
cgagctggcgaattcc  
>CD\_NM\_002100.3:231  
CgCctGcgagtctGGtatGATCCTGTAGTGATAATACTCATTTCAAGAGAATGAGTATTATCACTACAGGAGTTTTGct  
cgagctggcgaattcc  
>CD\_NM\_002100.3:126  
CgCctGcgagtctGGtatGCGGTGGCAATGCACACTTCAACTTCAAGAGAGTTGAAGTGTGCATTGCCACCTTTTTGct  
cgagctggcgaattcc  
>CD\_NM\_002100.3:282  
CgCctGcgagtctGGtatGAAACGATCCTCTTAATTTCTTATTCAAGAGATAAGAAATTAAGAGGATCGTTCTTTTTGct  
cgagctggcgaattcc  
>CD\_NM\_002100.3:99  
CgCctGcgagtctGGtatGCGAGCATATCAGCATTAAGTACTTCAAGAGAGTACTTAATGCTGATATGCTCATTTTTGct  
cgagctggcgaattcc  
>CD\_NM\_002100.3:115  
CgCctGcgagtctGGtatGCAGTACCACTGAGGTGGCAATGTTCAAGAGACATTGCCACCTCAGTGGTACTTTTTGct  
cgagctggcgaattcc  
>CD\_NM\_002101:367  
CgCctGcgagtctGGtatGCTCGTCTAGTCTCCCTCCTTTTCAAGAGAAGAGGAGGGAGACTAGGACGATTTTTGct  
cgagctggcgaattcc  
>CD\_NM\_002101:485  
CgCctGcgagtctGGtatGCGGGAGACCCTGCCCTCCAAGATTCAAGAGATCTTGGAGGGCAGGGTCTCCCTTTTTGct  
cgagctggcgaattcc  
>CD\_NM\_002101:495  
CgCctGcgagtctGGtatGCGCCCTCCAAGATGCTGGTGATTTCAAGAGAATCACCAGCATCTTGGAGGGCATTTTTGct  
cgagctggcgaattcc  
>CD\_NM\_002101:516  
CgCctGcgagtctGGtatGCAGCAGCAGAAAGGAGTACTTTTTCAAGAGAAAAGTACTCCTTTCTGCTGCTATTTTTGct  
cgagctggcgaattcc  
>CD\_NM\_002101.3:220  
CgCctGcgagtctGGtatGCGGCCTCTGCCTCCACCACAATTTCAAGAGAATTGTGGTGGAGGCAGAGGCCATTTTTGct  
cgagctggcgaattcc  
>CD\_NM\_002101.3:447  
CgCctGcgagtctGGtatGAGCACGGAGTTTGTGAGAGTGTTCAGGAGACACTCTCAGCAAACCTCCGTGCCTTTTTGct  
cgagctggcgaattcc  
>CD\_NM\_002101.3:485

CgCtGcgagtctGGtatGAGGAGACCTGCCCTCCAAGATTTCAAGAGAATCTTGGAGGGCAGGGTCTCCCTTTTTGct  
cgagctggcgaattcc  
>CD\_NM\_002101.3:226  
CgCtGcgagtctGGtatGATGCCTCCACCACAATGCATACTTCAAGAGAGTATGCATTGTGGTGGAGGCAGTTTTTgct  
cgagctggcgaattcc  
>CD\_NM\_002101.3:388  
CgCtGcgagtctGGtatGCCGTCATGCTGCGCTACATGTATTCAAGAGATACATGTAGCGCAGCATGACGATTTTTGct  
cgagctggcgaattcc  
>CD\_NM\_002101.3:483  
CgCtGcgagtctGGtatGAAGGGAGACCTGCCCTCCAAGTTCAAGAGACTTGGAGGGCAGGGTCTCCCTGTTTTTgct  
cgagctggcgaattcc  
>CD\_NM\_002101.3:506  
CgCtGcgagtctGGtatGCGCTGGTGATAGCAGCAGAAAGTTCAAGAGACTTCTGCTGCTATCACCAGCATTTTTGct  
cgagctggcgaattcc  
>CD\_NM\_002101.3:456  
CgCtGcgagtctGGtatGCTTGCTGAGAGTGCAGATGCAGTTCAAGAGACTGCATCTGCACTCTCAGCAAATTTTTGct  
cgagctggcgaattcc  
>CD\_NM\_002101.3:373  
CgCtGcgagtctGGtatGCAGTCTCCCTCCTCTTCGTCATTTCAAGAGAATGACGAAGAGGAGGGAGACTATTTTTGct  
cgagctggcgaattcc  
>CD\_NM\_002101.3:367  
CgCtGcgagtctGGtatGCCGTCCTAGTCTCCCTCCTCTTTTTCAAGAGAAAGAGGAGGGAGACTAGGACGATTTTTGct  
cgagctggcgaattcc  
>CD\_NM\_002101.3:495  
CgCtGcgagtctGGtatGACCCTCCAAGATGCTGGTGATATTCAAGAGATATCACCAGCATCTTGGAGGGCTTTTTGct  
cgagctggcgaattcc  
>CD\_NM\_002101.3:509  
CgCtGcgagtctGGtatGCGGTGATAGCAGCAGAAAGGAGTTCAAGAGACTCCTTTCTGCTGCTATCACCATTTTTGct  
cgagctggcgaattcc  
>CD\_NM\_002101.3:284  
CgCtGcgagtctGGtatGCTGGCCGGATGGCAGAATGGAGTTCAAGAGACTCCATTCTGCCATCCGGCCATTTTTGct  
cgagctggcgaattcc  
>CD\_NM\_002101.3:371  
CgCtGcgagtctGGtatGACTAGTCTCCCTCCTCTTCGTCCTTCAAGAGAGACGAAGAGGAGGGAGACTAGTTTTTgct  
cgagctggcgaattcc  
>CD\_NM\_002101.3:356  
CgCtGcgagtctGGtatGCGCTGTGGCCATCGTCCTAGTCTTCAAGAGAGACTAGGACGATGGCCACAGCATTTTTGct  
cgagctggcgaattcc  
>CD\_NM\_002101.3:279  
CgCtGcgagtctGGtatGCCTGGATGGCCGGATGGCAGAATTCAAGAGATTCTGCCATCCGGCCATCCAGATTTTTGct  
cgagctggcgaattcc  
>CD\_NM\_002101.3:331  
CgCtGcgagtctGGtatGCTGTGTCATTCAGGTGTGATTTCAAGAGAATCACACCTGCAATGACGACAATTTTTGct  
cgagctggcgaattcc  
>CD\_NM\_002101.3:252  
CgCtGcgagtctGGtatGCCATTGCAGAGCCTGATCCAGTTCAAGAGACTGGATCAGGCTCTGCAATGGTTTTTTGct  
cgagctggcgaattcc  
>CD\_NM\_002101.3:410  
CgCtGcgagtctGGtatGACGGCACAAGGGCACGTACCCTTCAAGAGAGTGGTACGTGCCCTTGTGCCGTTTTTTGct  
cgagctggcgaattcc  
>CD\_NM\_002101.3:383  
CgCtGcgagtctGGtatGACTCTTCGTCATGCTGCGCTACTTCAAGAGAGTAGCGCAGCATGACGAAGAGTTTTTgct  
cgagctggcgaattcc  
>CD\_NM\_002101.3:450

CgCctGcgagtctGGtatGCCGGAGTTTGTGAGAGTGCAGTTCAAGAGACTGCACTCTCAGCAAACCTCCGTTTTTTTGct  
cgagctggcgaattcc  
>CD\_NM\_002101.3:412  
CgCctGcgagtctGGtatGAGCACAAAGGGCACGTACCACACTTCAAGAGAGTGTGGTACGTGCCCTTGTGCCTTTTTTGct  
cgagctggcgaattcc  
>CD\_NM\_002101.3:445  
CgCctGcgagtctGGtatGCCGGCACGGAGTTTGTGAGAGTTCAGCAAACTCCGTGCCCTTTTTTTGct  
cgagctggcgaattcc  
>CD\_NM\_002101.3:336  
CgCctGcgagtctGGtatGATCATTGCAGGTGTGATTGCTGTTCAAGAGACAGCAATCACACCTGCAATGACTTTTTTGct  
cgagctggcgaattcc  
>CD\_NM\_002101.3:386  
CgCctGcgagtctGGtatGATTCGTCATGCTGCGCTACATGTTCAAGAGACATGTAGCGCAGCATGACGAAGTTTTTGct  
cgagctggcgaattcc  
>CD\_NM\_002101.3:511  
CgCctGcgagtctGGtatGATGATAGCAGCAGAAAGGAGTATTCAAGAGATACTCCTTTCTGCTGCTATCACTTTTTGct  
cgagctggcgaattcc  
>CD\_NM\_002101.3:257  
CgCctGcgagtctGGtatGCGCAGAGCCTGATCCAGGGATGTTCAAGAGACATCCCTGGATCAGGCTCTGCATTTTTTGct  
cgagctggcgaattcc  
>CD\_NM\_002101.3:395  
CgCctGcgagtctGGtatGACTGCGCTACATGTACCGGCACTTCAAGAGAGTGCCGGTACATGTAGCGCAGCTTTTTTGct  
cgagctggcgaattcc  
>CD\_NM\_002101.3:377  
CgCctGcgagtctGGtatGATCCCTCCTCTTCGTCATGCTGTTCAAGAGACAGCATGACGAAGAGGAGGGAGTTTTTGct  
cgagctggcgaattcc  
>CD\_NM\_000420:740  
CgCctGcgagtctGGtatGAAGGCTGGCGCATCTCTGGTAATTCAAGAGATTACCAGAGATGCGCCAGCCTTTTTTGct  
cgagctggcgaattcc  
>CD\_NM\_000420:1099  
CgCctGcgagtctGGtatGCAGCTCTTCCAGATGGTCACTATTCAAGAGATAGTGACCATCTGGAAGAGCTTTTTTTGct  
cgagctggcgaattcc  
>CD\_NM\_000420:1514  
CgCctGcgagtctGGtatGACCGAAGTGCTGCCATGAAATTTTCAAGAGAAATTTTCATGGCAGCACTTCGGTTTTTTGct  
cgagctggcgaattcc  
>CD\_NM\_000420:1555  
CgCctGcgagtctGGtatGACCCTCATCACTCGCCTCAGAATTCAAGAGATTCTGAGGCGAGTGATGAGGGCTTTTTTGct  
cgagctggcgaattcc  
>CD\_NM\_000420:1680  
CgCctGcgagtctGGtatGAGCCCGACAAGAATACAACGATTTCAAGAGAATCGTTGTATTCTTGTGGGCTTTTTTGct  
cgagctggcgaattcc  
>CD\_NM\_000420:1744  
CgCctGcgagtctGGtatGATCCGGTCCCTCCGAGCTAGAATTCAAGAGATTCTAGCTCGGAGGGACCGGACTTTTTTGct  
cgagctggcgaattcc  
>CD\_NM\_000420:2046  
CgCctGcgagtctGGtatGACGCCATTATGCTGCCTTTCCATTCAAGAGATGGAAAGGCAGCATAATGGCGCTTTTTTGct  
cgagctggcgaattcc  
>CD\_NM\_000420:2218  
CgCctGcgagtctGGtatGAAGCAGATCTTCTTTTCAAGAGCTTTCAAGAGAAGCTTCGAAAGAAGATCTGCTGTTTTTGct  
cgagctggcgaattcc  
>CD\_NM\_000420:565  
CgCctGcgagtctGGtatGAAGGAGCTTGCCACAAGAACATTCAAGAGATGTTCTTTGTGGCAAGCTCCTGTTTTTGct  
cgagctggcgaattcc  
>CD\_NM\_000420:1513

CgCtGcgagtctGGtatGCCCCGAAGTGCTGCCATGAAATTTCAAGAGAATTCATGGCAGCACTTCGGGTTTTTTGct  
cgagctggcgaattcc  
>CD\_NM\_000420.2:1844  
CgCtGcgagtctGGtatGCTCTGACCATGTGGTAGTCTTTTTCAAGAGAAAAGACTACCACATGGTCAGATTTTTTTGct  
cgagctggcgaattcc  
>CD\_NM\_000420.2:2093  
CgCtGcgagtctGGtatGATCCCTCACATTCCTTAGAGAATTTCAAGAGAATTCCTAAGAATGTGAGGGAGTTTTTTGct  
cgagctggcgaattcc  
>CD\_NM\_000420.2:1027  
CgCtGcgagtctGGtatGACTTGTCATCTCCATCACTTCTTCAAGAGAGAAGTGATGGAGATTGACAAGGTTTTTTGct  
cgagctggcgaattcc  
>CD\_NM\_000420.2:1256  
CgCtGcgagtctGGtatGAGTGGAGGAGATGCTGCTAAAGTTCAAGAGACTTTAGCAGCATCTCCTCCACCTTTTTGct  
cgagctggcgaattcc  
>CD\_NM\_000420.2:766  
CgCtGcgagtctGGtatGATTCTTAACTTTAACCGAAGTTCAAGAGAGTTCGGTTAAAGTTAAGGAAGTTTTTTGct  
cgagctggcgaattcc  
>CD\_NM\_000420.2:1814  
CgCtGcgagtctGGtatGACCTTGGGACGTCAATGCTTACTTCAAGAGAGTAAGCATTGACGTCCCAAGGTTTTTTGct  
cgagctggcgaattcc  
>CD\_NM\_000420.2:2215  
CgCtGcgagtctGGtatGACCAGCAGATCTTCTTTTCAAGTTCAAGAGACTTCGAAAGAAGATCTGCTGGGTTTTTTGct  
cgagctggcgaattcc  
>CD\_NM\_000420.2:1001  
CgCtGcgagtctGGtatGACCAAGCAAGGTGCAAGAACACTTCAAGAGAGTGTCTTGCACCTTGCTTGGGTTTTTTGct  
cgagctggcgaattcc  
>CD\_NM\_000420.2:1202  
CgCtGcgagtctGGtatGCTCTCAGTCCCTCGTGGTCCATTTCAAGAGAATGGACCACGAGGGACTGAGAATTTTTTTGct  
cgagctggcgaattcc  
>CD\_NM\_000420.2:1280  
CgCtGcgagtctGGtatGAAGGGACTTCTGCAGAGCCACTTCAAGAGAGTGGCTCTGCAGAAAGTCCCTTTTTTTGct  
cgagctggcgaattcc  
>CD\_NM\_000420.2:1946  
CgCtGcgagtctGGtatGAGCCCACGAGCTGTTGCACATCTTCAAGAGAGATGTGCAACAGCTCGTGGGCCTTTTTTTGct  
cgagctggcgaattcc  
>CD\_NM\_000420.2:760  
CgCtGcgagtctGGtatGCATGGACTTCCTTAACTTTAATTCAAGAGATTAAGTTAAGGAAGTCCATTTTTTTTGGct  
cgagctggcgaattcc  
>CD\_NM\_000420.2:1217  
CgCtGcgagtctGGtatGAGTCCATGACGTGGAATATTTGTTCAAGAGACAAATATTCACGTCATGGACCTTTTTTTGct  
cgagctggcgaattcc  
>CD\_NM\_000420.2:2043  
CgCtGcgagtctGGtatGCAGCGCCATTATGCTGCCTTTCTTCAAGAGAGAAAGGCAGCATAATGGCGCTTTTTTTGct  
cgagctggcgaattcc  
>CD\_NM\_000420.2:1829  
CgCtGcgagtctGGtatGCGCTTACTATTCGGTATCTGACTTCAAGAGAGTCAGATACCGAATAGTAAGCATTTTTTTGct  
cgagctggcgaattcc  
>CD\_NM\_000420.2:2156  
CgCtGcgagtctGGtatGAAGCAAGAGGCTGTACGGCACTTCAAGAGAGTGCCGTAACAGCCTCTTGCTGTTTTTTGct  
cgagctggcgaattcc  
>CD\_NM\_000420.2:849  
CgCtGcgagtctGGtatGAATCCTGCCCTCCACACACTTCAAGAGAGTGTGTGTGGAGAGGCAGGATTTTTTTGct  
cgagctggcgaattcc  
>CD\_NM\_000420.2:1556

CgCtGcgagtctGGtatGACTCATCACTCGCCTCAGAACTTCAAGAGAGTTTCTGAGGCGAGTGATGAGGTTTTTGct  
cgagctggcgaattcc  
>CD\_NM\_000420.2:1118  
CgCtGcgagtctGGtatGCATCGACCAGCTCAAGGAAATGTTCAAGAGACATTTCCCTTGAGCTGGTCGATATTTTTGct  
cgagctggcgaattcc  
>CD\_NM\_000420.2:2135  
CgCtGcgagtctGGtatGCGCCATCGCGCTGCAGGCATACTTCAAGAGAGTATGCCTGCAGCGCGATGGCTTTTTTGct  
cgagctggcgaattcc  
>CD\_NM\_000420.2:452  
CgCtGcgagtctGGtatGATGTTTGGATCTCCGGGATCATTTCAGAGAATGATCCCGGAGATCCAAACACTTTTTGct  
cgagctggcgaattcc  
>CD\_NM\_000420.2:1517  
CgCtGcgagtctGGtatGCAGTGCTGCCATGAAATTATTCTTCAAGAGAGAATAATTCATGGCAGCACTTTTTTGct  
cgagctggcgaattcc  
>CD\_NM\_000420.2:1261  
CgCtGcgagtctGGtatGCGGAGATGCTGCTAAAGCAGAGTTCAAGAGACTCTGCTTTAGCAGCATCTCCTTTTTGct  
cgagctggcgaattcc  
>CD\_NM\_005581:1152  
CgCtGcgagtctGGtatGCAGGTGCTTTCCTTACCTCTAATTCAAGAGATTAGAGGTAAGGAAAGCACCTTTTTTGct  
cgagctggcgaattcc  
>CD\_NM\_005581:178  
CgCtGcgagtctGGtatGAAGGAAAGTCTGTCAATCTGGATTCAAGAGATCCAGAATGACAGACTTTCCTTTTTGct  
cgagctggcgaattcc  
>CD\_NM\_005581:972  
CgCtGcgagtctGGtatGAAGGAGGAAGTGTGAATGTGATTCAAGAGATCACATTCAGCACTTCTCCTGTTTTGct  
cgagctggcgaattcc  
>CD\_NM\_005581:459  
CgCtGcgagtctGGtatGACGCGCTCAACGTGTTTGCAATTCAAGAGATTGCAAACACGTTGAGCCGCGCTTTTTGct  
cgagctggcgaattcc  
>CD\_NM\_005581:1438  
CgCtGcgagtctGGtatGCAGGAGACGAAGTCACACTCATTTCAGAGAATGAGTGTGACTTCGTCTCCTTTTTGct  
cgagctggcgaattcc  
>CD\_NM\_005581:209  
CgCtGcgagtctGGtatGCACGGGAACCCACGACCATTATTCAGAGAATAATGGTCGTGGGTTCCCGTATTTTTGct  
cgagctggcgaattcc  
>CD\_NM\_005581:1338  
CgCtGcgagtctGGtatGACGGTCCCTCAGCCGACCCAGATTCAAGAGATCTGGGTGCGGCTGAGGACCGGTTTTGct  
cgagctggcgaattcc  
>CD\_NM\_001013257.1:460  
CgCtGcgagtctGGtatGACGGCTCAACGTGTTTGCAAAGTTCAAGAGACTTTCGCAAACACGTTGAGCCGCTTTTTGct  
cgagctggcgaattcc  
>CD\_NM\_001013257.1:514  
CgCtGcgagtctGGtatGAACACTGTCTGTGATGGAGGACTTCAAGAGAGTCCATCACAGACAGTGTCTTTTTGct  
cgagctggcgaattcc  
>CD\_NM\_001013257.1:178  
CgCtGcgagtctGGtatGCGGAAAGTCTGTCAATCTGGACTTCAAGAGAGTCCAGAATGACAGACTTTCCTTTTTGct  
cgagctggcgaattcc  
>CD\_NM\_001013257.1:1438  
CgCtGcgagtctGGtatGCGGAGACGAAGTCACACTCATCTTCAAGAGAGATGAGTGTGACTTCGTCTCCTTTTTGct  
cgagctggcgaattcc  
>CD\_NM\_001013257.1:892  
CgCtGcgagtctGGtatGAGGTGACACTGTCCAGCTGCTTTCAGAGAGAGCAGCTGGACAGTGTCCACCTTTTTGct  
cgagctggcgaattcc  
>CD\_NM\_001013257.1:464

CgCtGcgagtctGGtatGATCAACGTGTTGCAAAGCCAGTTCAAGAGACTGGCTTTGCAAACACGTGAGTTTTTGct  
cgagctggcgaattcc  
>CD\_NM\_001013257.1:1048  
CgCtGcgagtctGGtatGCGGCTGCAGAGTGGAGGATTACTTCAAGAGAGTAATCCTCCACTCTGCAGCCATTTTTGct  
cgagctggcgaattcc  
>CD\_NM\_001013257.1:1266  
CgCtGcgagtctGGtatGCGCTGTCGCTCAGTTCTATCACTTCAAGAGAGTGATAGAACTGAGCGACAGCATTTTTGct  
cgagctggcgaattcc  
>CD\_NM\_001013257.1:613  
CgCtGcgagtctGGtatGACGCTGGAGGTGCCCGTAGAGTTCAAGAGACTCTACGGGCACCTCCAGGCGTTTTGct  
cgagctggcgaattcc  
>CD\_NM\_001013257.1:405  
CgCtGcgagtctGGtatGAAGACTACGTGTGCGTGGTGAGTTCAAGAGACTCACCACGCACACGTAGTCTTTTTGct  
cgagctggcgaattcc  
>CD\_NM\_001013257.1:1386  
CgCtGcgagtctGGtatGAAGAGCTAAAGACAGCGGAAATTTCAAGAGAATTTCCGCTGTCTTTAGCTCTTTTTGct  
cgagctggcgaattcc  
>CD\_NM\_001013257.1:1279  
CgCtGcgagtctGGtatGCTCTATCACCTTCGATTCCAATTTCAAGAGAATTGGAATCGAAGGTGATAGAATTTTTGct  
cgagctggcgaattcc  
>CD\_NM\_001013257.1:1552  
CgCtGcgagtctGGtatGAAGCAGCTCTCTGACCCTGAAATTTCAAGAGATTTAGGGTCAGAGAGCTGCTTTTTGct  
cgagctggcgaattcc  
>CD\_NM\_001013257.1:1152  
CgCtGcgagtctGGtatGCGGTGCTTTCCCTTACCTCTAAATTTCAAGAGATTTAGAGGTAAGGAAAGCACCTTTTTGct  
cgagctggcgaattcc  
>CD\_NM\_001013257.1:1373  
CgCtGcgagtctGGtatGATCCAAGGCTCGCCAGAGCTAATTTCAAGAGATTAGCTCTGGCGAGCCTTGACTTTTTGct  
cgagctggcgaattcc  
>CD\_NM\_001013257.1:585  
CgCtGcgagtctGGtatGACAAGATCACGTGGTATCGCAATTTCAAGAGATTGCGATACCACGTGATCTTGTTTTGct  
cgagctggcgaattcc  
>CD\_NM\_001013257.1:1744  
CgCtGcgagtctGGtatGATTCTACTGCGTGAGACGCAAATTTCAAGAGATTTGCGTCTCACGCAGTAGAAGTTTTGct  
cgagctggcgaattcc  
>CD\_NM\_001013257.1:1326  
CgCtGcgagtctGGtatGCGCCACAGTCCCGTCTCAGTTCAAGAGACTGAGGACCGGGACTGTGGGCATTTTTGct  
cgagctggcgaattcc  
>CD\_NM\_001013257.1:543  
CgCtGcgagtctGGtatGCGGAGATCGCCACCTGCAACAGTTCAAGAGACTGTTGCAGGTGGCGATCTCCTTTTTGct  
cgagctggcgaattcc  
>CD\_NM\_001013257.1:1264  
CgCtGcgagtctGGtatGAATGCTGTCGCTCAGTTCTATCTTCAAGAGAGATAGAACTGAGCGACAGCATTTTTGct  
cgagctggcgaattcc  
>CD\_NM\_001013257.1:454  
CgCtGcgagtctGGtatGAACTGCGCGCTCAACGTGTTTTTCAAGAGAAAACACGTTGAGCCGCGCAGTTTTTGct  
cgagctggcgaattcc  
>CD\_NM\_001013257.1:1684  
CgCtGcgagtctGGtatGCGGAGTGGCCGTCATGGCCGTGTTCAAGAGACACGGCCATGACGGCCACTCCATTTTTGct  
cgagctggcgaattcc  
>CD\_NM\_001013257.1:757  
CgCtGcgagtctGGtatGAGCCCACTACAGCTGCCGAGTTCAAGAGACTCGGGCAGGCTGTAGTGGGCGTTTTGct  
cgagctggcgaattcc  
>CD\_NM\_001013257.1:163



CgCctGcgagtctGGtatGAGTGGAGGTGATGCGAGGAAAGTTCAAGAGACTTTCCTCGCATCACCTCCACCTTTTTTGct  
cgagctggcgaattcc  
>CD\_NM\_001013257.1:625  
CgCctGcgagtctGGtatGACCCGTAGAGATGAACCCAGAGTTCAAGAGACTCTGGGTTTCATCTCTACGGGCTTTTTTGct  
cgagctggcgaattcc  
>CD\_NM\_001013257.1:556  
CgCctGcgagtctGGtatGATGCAACAGCCGGAACGGGAACTTCAAGAGAGTTCCTCGGCTGTTGCAGTTTTTTGct  
cgagctggcgaattcc  
>CD\_NM\_138617:540  
CgCctGcgagtctGGtatGCCCCTGAGGATGGTCATCAGTATTCAAGAGATACTGATGACCATCCTCAGGGTTTTTTGct  
cgagctggcgaattcc  
>CD\_NM\_138617:1267  
CgCctGcgagtctGGtatGCAGCACCTCATGTGGCTAAATATTCAAGAGATATTTAGCCACATGAGGTGCTTTTTTTGct  
cgagctggcgaattcc  
>CD\_NM\_138617:151  
CgCctGcgagtctGGtatGAAGCTCTCATTCCTCTTCTATTCAAGAGATAGAAGAGGAGAATGAGAGCTTTTTTTGct  
cgagctggcgaattcc  
>CD\_NM\_138617:1262  
CgCctGcgagtctGGtatGCTGGAAAGCACCTCATGTGGCTTTCAAGAGAAGCCACATGAGGTGCTTTCATTTTTTTGct  
cgagctggcgaattcc  
>CD\_NM\_138617:402  
CgCctGcgagtctGGtatGATGGTCATCACACTGTTTCAGTATTCAAGAGATACTGAACAGTGTGATGACCACTTTTTTGct  
cgagctggcgaattcc  
>CD\_NM\_020485:151  
CgCctGcgagtctGGtatGAAGCTCTCATTCCTCTTCTATTCAAGAGATAGAAGAGGAGAATGAGAGCTTTTTTTGct  
cgagctggcgaattcc  
>CD\_NM\_020485:1267  
CgCctGcgagtctGGtatGCAGCACCTCATGTGGCTAAATATTCAAGAGATATTTAGCCACATGAGGTGCTTTTTTTGct  
cgagctggcgaattcc  
>CD\_NM\_020485:213  
CgCctGcgagtctGGtatGAGGCTCGTGGCATCCTATCAAGTTCAAGAGACTTGATAGGATGCCACGAGCCTTTTTTGct  
cgagctggcgaattcc  
>CD\_NM\_020485:540  
CgCctGcgagtctGGtatGCCCCTGAGGATGGTCATCAGTATTCAAGAGATACTGATGACCATCCTCAGGGTTTTTTGct  
cgagctggcgaattcc  
>CD\_NM\_020485.3:151  
CgCctGcgagtctGGtatGCGCTCTCATTCCTCTTCTATTTCAGAGAAATAGAAGAGGAGAATGAGAGCTTTTTTTGct  
cgagctggcgaattcc  
>CD\_NM\_020485.3:1267  
CgCctGcgagtctGGtatGCGCACCTCATGTGGCTAAATATTTCAAGAGAAATATTTAGCCACATGAGGTGCTTTTTTTGct  
cgagctggcgaattcc  
>CD\_NM\_020485.3:803  
CgCctGcgagtctGGtatGCACACCTACTATGCTCTAGCAGTTCAAGAGACTGCTAGAGCATAGTAGGTGTTTTTTGct  
cgagctggcgaattcc  
>CD\_NM\_020485.3:1062  
CgCctGcgagtctGGtatGACGTCATGCACTCCATCTTCAGTTCAAGAGACTGAAGATGGAGTGCATGACGGTTTTTTGct  
cgagctggcgaattcc  
>CD\_NM\_020485.3:1084  
CgCctGcgagtctGGtatGATTGCTGGGTCTGCTTGGAGAGTTCAAGAGACTCTCCAAGCAGACCCAGCAAGTTTTTTGct  
cgagctggcgaattcc  
>CD\_NM\_020485.3:729  
CgCctGcgagtctGGtatGCCTTGTGGATGTTCTGGCCAAGTTCAAGAGACTTGCCAGAACATCCACAAGATTTTTTTGct  
cgagctggcgaattcc  
>CD\_NM\_020485.3:765

CgCctGcgagtctGGtatGCGCTGAGAAGTCCAATCCAAAGTTCAAGAGACTTTGGATTGGACTTCTCAGCATTTTTGct  
cgagctggcgaattcc  
>CD\_NM\_020485.3:784  
CgCctGcgagtctGGtatGCAGGAAGAATGCCATGTTCAACTTCAAGAGAGTTGAACATGGCATTCTTCCTTTTTTTGct  
cgagctggcgaattcc  
>CD\_NM\_020485.3:1131  
CgCctGcgagtctGGtatGCTCATACTGTCTGGAACGGCAATTCAAGAGATTGCCGTTCCAGACAGTATGAATTTTTGct  
cgagctggcgaattcc  
>CD\_NM\_020485.3:153  
CgCctGcgagtctGGtatGATCTCATTCTCCTCTTCTATTTTTCAAGAGAAAATAGAAGAGGAGAATGAGAGTTTTGct  
cgagctggcgaattcc  
>CD\_NM\_020485.3:1234  
CgCctGcgagtctGGtatGAACAGGTTTGCTCCTAAATCTCTTCAAGAGAGAGATTTAGGAGCAAACCTGTCTTTTGct  
cgagctggcgaattcc  
>CD\_NM\_020485.3:540  
CgCctGcgagtctGGtatGACCTGAGGATGGTCATCAGTAATTCAAGAGATTACTGATGACCATCCTCAGGGTTTTGct  
cgagctggcgaattcc  
>CD\_NM\_020485.3:1015  
CgCctGcgagtctGGtatGATGCCTGCCGGTGTGTTGTAACCTCAAGAGAGTTACAACACACCGGCAGGCACTTTTGct  
cgagctggcgaattcc  
>CD\_NM\_020485.3:1019  
CgCctGcgagtctGGtatGATGCCGGTGTGTTGTAACCGAGTTCAAGAGACTCGGTTACAACACACCGGCAGTTTTGct  
cgagctggcgaattcc  
>CD\_NM\_020485.3:723  
CgCctGcgagtctGGtatGACCTCTTCTTGTGGATGTTCTGTTCAAGAGACAGAACATCCACAAGAAGAGGGTTTTGct  
cgagctggcgaattcc  
>CD\_NM\_020485.3:1191  
CgCctGcgagtctGGtatGCACTCAGCTTGGCCATCGTGATTTCAAGAGAATCACGATGGCCAAGCTGAGTTTTTTGct  
cgagctggcgaattcc  
>CD\_NM\_020485.3:588  
CgCctGcgagtctGGtatGCCCTGAGGCACCTTCTACGTGTTTTCAAGAGAAACACGTAGAAGTGCCCTCAGGTTTTTTGct  
cgagctggcgaattcc  
>CD\_NM\_020485.3:541  
CgCctGcgagtctGGtatGACTGAGGATGGTCATCAGTAATTTCAAGAGAATTACTGATGACCATCCTCAGGTTTTTTGct  
cgagctggcgaattcc  
>CD\_NM\_020485.3:769  
CgCctGcgagtctGGtatGAAGAAGTCCAATCCAAAGGAAGTTCAAGAGACTTCCTTTGGATTGGACTTCTTTTTTTGct  
cgagctggcgaattcc  
>CD\_NM\_020485.3:1230  
CgCctGcgagtctGGtatGCCCTGACAGGTTTGCTCCTAAATTTCAAGAGATTTAGGAGCAAACCTGTCAGGATTTTTGct  
cgagctggcgaattcc  
>CD\_NM\_020485.3:403  
CgCctGcgagtctGGtatGAGTCATCACACTGTTTCAAGAGAAATACTGAACAGTGTGATGACCTTTTTGct  
cgagctggcgaattcc  
>CD\_NM\_020485.3:717  
CgCctGcgagtctGGtatGCGGGCGCCCTCTTCTTGTGGATTTCAAGAGAATCCACAAGAAGAGGGCGCCATTTTTGct  
cgagctggcgaattcc  
>CD\_NM\_020485.3:556  
CgCctGcgagtctGGtatGAAGTAATATCTTCAACACAGACTTCAAGAGAGTCTGTGTTGAAGATATTACTGTTTTTTGct  
cgagctggcgaattcc  
>CD\_NM\_020485.3:1108  
CgCctGcgagtctGGtatGAACCTACATTGTGCTGCTGGTGTTCAGAGACACCAGCAGCACAATGTAGGTGTTTTTTGct  
cgagctggcgaattcc  
>CD\_NM\_138617:512

CgCtGcgagtctGGtatGCACCTGAGGATGGTCATCAGTATTCAAGAGATACTGATGACCATCCTCAGGTTTTTTTGct  
cgagctggcgaattcc  
>CD\_NM\_138617:123  
CgCtGcgagtctGGtatGAAGCTCTCATTCTCCTCTTCTATTCAAGAGATAGAAGAGGAGAATGAGAGCTTTTTTTGct  
cgagctggcgaattcc  
>CD\_NM\_138617:374  
CgCtGcgagtctGGtatGATGGTCATCACACTGTTTCAGTATTCAAGAGATACTGAACAGTGTGATGACCACTTTTTTGct  
cgagctggcgaattcc  
>CD\_NM\_020485:123  
CgCtGcgagtctGGtatGAAGCTCTCATTCTCCTCTTCTATTCAAGAGATAGAAGAGGAGAATGAGAGCTTTTTTTGct  
cgagctggcgaattcc  
>CD\_NM\_020485:185  
CgCtGcgagtctGGtatGAGGCTCGTGGCATCCTATCAAGTTCAAGAGACTTGATAGGATGCCACGAGCCTTTTTTGct  
cgagctggcgaattcc  
>CD\_NM\_020485:512  
CgCtGcgagtctGGtatGCACCTGAGGATGGTCATCAGTATTCAAGAGATACTGATGACCATCCTCAGGTTTTTTTGct  
cgagctggcgaattcc  
>CD\_NM\_016124.3:123  
CgCtGcgagtctGGtatGCGCTCTCATTCTCCTCTTCTATTTCAAGAGAATAGAAGAGGAGAATGAGAGCTTTTTTTGct  
cgagctggcgaattcc  
>CD\_NM\_016124.3:775  
CgCtGcgagtctGGtatGCACACCTACTATGCTGTAGCAGTTCAAGAGACTGCTACAGCATAGTAGGTTTTTTTTGct  
cgagctggcgaattcc  
>CD\_NM\_016124.3:737  
CgCtGcgagtctGGtatGCGCTGAGAAGTCCAATCGAAAGTTCAAGAGACTTTCGATTGGACTTCTCAGCATTTTTTTGct  
cgagctggcgaattcc  
>CD\_NM\_016124.3:1056  
CgCtGcgagtctGGtatGATTGCTGGGTCTGCTTGGAGAGTTCAAGAGACTCTCCAAGCAGACCCAGCAAGTTTTTTGct  
cgagctggcgaattcc  
>CD\_NM\_016124.3:701  
CgCtGcgagtctGGtatGCCTTGTGGATGTTCTGGCCAAGTTCAAGAGACTTGGCCAGAACATCCACAAGTTTTTTGct  
cgagctggcgaattcc  
>CD\_NM\_016124.3:125  
CgCtGcgagtctGGtatGATCTCATTCTCCTCTTCTATTTTTCAAGAGAAAATAGAAGAGGAGAATGAGAGTTTTTTGct  
cgagctggcgaattcc  
>CD\_NM\_016124.3:1206  
CgCtGcgagtctGGtatGAACAGGTTTGTCTCTAAATCTTTTTCAAGAGAAAGATTTAGGAGCAAACCTGTCTTTTTTGct  
cgagctggcgaattcc  
>CD\_NM\_016124.3:512  
CgCtGcgagtctGGtatGCCCTGAGGATGGTCATCAGTAATTCAAGAGATTACTGATGACCATCCTCAGGTTTTTTGct  
cgagctggcgaattcc  
>CD\_NM\_016124.3:695  
CgCtGcgagtctGGtatGACCTCTTCTTGTGGATGTTCTGTTCAAGAGACAGAACATCCACAAGAAGAGGGTTTTTTGct  
cgagctggcgaattcc  
>CD\_NM\_016124.3:756  
CgCtGcgagtctGGtatGCAGGAAGAAATGCCGTGTTCAACTTCAAGAGAGTTGAACACGGCATTCTTCTTTTTTTGct  
cgagctggcgaattcc  
>CD\_NM\_016124.3:543  
CgCtGcgagtctGGtatGAACAGACTACCACATGAACATGTTCAAGAGACATGTTTCATGTGGTAGTCTGTGTTTTTTGct  
cgagctggcgaattcc  
>CD\_NM\_016124.3:1239  
CgCtGcgagtctGGtatGCGCACCTCATGAGGCTAAATATTTCAAGAGAATATTTAGCCTCATGAGGTGCTTTTTTTGct  
cgagctggcgaattcc  
>CD\_NM\_016124.3:1163

CgCtGcgagtctGGtatGCACTCAGCTTGGCCATCGTGATTTCAAGAGAATCACGATGGCCAAGCTGAGTTTTTTTgct  
cgagctggcgaattcc  
>CD\_NM\_016124.3:513  
CgCtGcgagtctGGtatGACTGAGGATGGTCATCAGTAATTTCAAGAGAATTACTGATGACCATCCTCAGTTTTTTGct  
cgagctggcgaattcc  
>CD\_NM\_016124.3:1202  
CgCtGcgagtctGGtatGCCCTGACAGTTTGCTCCTAAATTTCAAGAGATTTAGGAGCAAACCTGTCAGGATTTTTGct  
cgagctggcgaattcc  
>CD\_NM\_016124.3:375  
CgCtGcgagtctGGtatGAGTCATCACACTGTTTCAAGAGAAATACTGAACAGTGTGATGACCTTTTTGct  
cgagctggcgaattcc  
>CD\_NM\_016124.3:689  
CgCtGcgagtctGGtatGCGGGCGCCCTCTTCTTGTGGATTTCAAGAGAATCCACAAGAAGAGGGCGCCATTTTTGct  
cgagctggcgaattcc  
>CD\_NM\_016124.3:528  
CgCtGcgagtctGGtatGAAGTAATATCTTCAACACAGACTTCAAGAGAGTCTGTGTTGAAGATATTACTGTTTTGct  
cgagctggcgaattcc  
>CD\_NM\_016124.3:1031  
CgCtGcgagtctGGtatGACTCCATCATGGGCTACAACTTTTCAAGAGAAAGTTGTAGCCCATGATGGAGCTTTTTGct  
cgagctggcgaattcc  
>CD\_NM\_016124.3:1086  
CgCtGcgagtctGGtatGAATTGTGCTGCTGGTGGTGGATTTCAAGAGAATCAAGCACCAGCAGCACAATTTTTGct  
cgagctggcgaattcc  
>CD\_NM\_016124.3:474  
CgCtGcgagtctGGtatGAGTGGTGATGGTGGTGGAGTTCAAGAGACTCCACCAGCACCATCACCACCTTTTTGct  
cgagctggcgaattcc  
>CD\_NM\_016124.3:332  
CgCtGcgagtctGGtatGCCCTGCTGGACGGCTTCTGAGTTCAAGAGACTCAGGAAGCCGTCCAGCAGGATTTTTGct  
cgagctggcgaattcc  
>CD\_NM\_016124.3:741  
CgCtGcgagtctGGtatGAAGAAGTCCAATCGAAAGGAAGTTCAAGAGACTTCCTTTGATTGGACTTCTTTTTGct  
cgagctggcgaattcc  
>CD\_NM\_016124.3:1234  
CgCtGcgagtctGGtatGCGGAAAGCACCTCATGAGGCTATTCAAGAGATAGCCTCATGAGGTGCTTTCATTTTTGct  
cgagctggcgaattcc  
>CD\_NM\_016124.3:1194  
CgCtGcgagtctGGtatGATCTGGTCTCCTGACAGGTTTGTTCAAAGAGACAAACCTGTCAGGAGACCAGACTTTTTGct  
cgagctggcgaattcc  
>CD\_NM\_016124.3:1208  
CgCtGcgagtctGGtatGAAGGTTTGCTCCTAAATCTTAATTTCAAGAGATTAAGATTTAGGAGCAAACCTGTTTTGct  
cgagctggcgaattcc  
>CD\_NM\_016124.3:486  
CgCtGcgagtctGGtatGACTGGTGGAGGTGACAGCTTTATTCAAGAGATAAAGCTGTACCTCCACCAGCTTTTTGct  
cgagctggcgaattcc  
>CD\_NM\_000324:157  
CgCtGcgagtctGGtatGCTGGGCATATCTTTGAGTTATTTCAAGAGAATAACTCAAAGAATATGCCATTTTTGct  
cgagctggcgaattcc  
>CD\_NM\_000324:442  
CgCtGcgagtctGGtatGCCCCAAATGCTGATCATGACAATTTCAAGAGATTGTCATGATCAGCATTGGGTTTTGct  
cgagctggcgaattcc  
>CD\_NM\_000324:519  
CgCtGcgagtctGGtatGAGCCTCTGACATTGGAGCATCATTCAAGAGATGATGCTCCAATGTCAGAGGCCTTTTTGct  
cgagctggcgaattcc  
>CD\_NM\_000324:876

CgCctGcgagtctGGtatGAGGCACTTGTGCGGATATGGCATTCAAGAGATGCCATATCCGCACAAGTGCCCTTTTTGct  
cgagctggcgaattcc  
>CD\_NM\_000324:1148  
CgCctGcgagtctGGtatGCTGGAGGTCTGATGACAGGTTTTTCAAGAGAAAACCTGTCATCAGACCTCCAATTTTTGct  
cgagctggcgaattcc  
>CD\_NM\_000324:496  
CgCctGcgagtctGGtatGCACCTGGTTAGTGAAATATTTATTCAAGAGATAAATATTTCACTAACCAGGTATTTTTGct  
cgagctggcgaattcc  
>CD\_NM\_000324:634  
CgCctGcgagtctGGtatGCCCCATACTACTCAGACTTGTTCCTCAAGAGAACAAGTCTGAGTAGTATGCGGATTTTTGct  
cgagctggcgaattcc  
>CD\_NM\_000324.1:938  
CgCctGcgagtctGGtatGCATGGTCTCTGTGCTTGGATACTTCAAGAGAGTATCCAAGCACAGAGACCATTTTTTgct  
cgagctggcgaattcc  
>CD\_NM\_000324.1:84  
CgCctGcgagtctGGtatGCTTGGATTATTTGTTGAGTATGTTCAAGAGACATACTCAACAAATAATCCAAATTTTTGct  
cgagctggcgaattcc  
>CD\_NM\_000324.1:711  
CgCctGcgagtctGGtatGCTTGTGAACCTGGAGACAAACTTCAAGAGAGTTTGTCTCCAGGTTCCAGCAATTTTTGct  
cgagctggcgaattcc  
>CD\_NM\_000324.1:35  
CgCctGcgagtctGGtatGAACATTCCCTCTCATGGCTATATTCAAGAGATATAGCCATGAGAGGGAATGTGTTTTGct  
cgagctggcgaattcc  
>CD\_NM\_000324.1:900  
CgCctGcgagtctGGtatGAACCCATTTGGTTCATGATTATTCAAGAGATAATCATAGAACCAAATGGGTTTTTGct  
cgagctggcgaattcc  
>CD\_NM\_000324.1:901  
CgCctGcgagtctGGtatGCCCCATTTGGTTCATGATTATTCAAGAGAATAATCATAGAACCAAATGGGTTTTTGct  
cgagctggcgaattcc  
>CD\_NM\_000324.1:332  
CgCctGcgagtctGGtatGCAGCCAGGGACAGAAATTTAACTTCAAGAGAGTTAAATTTCTGTCCCTGGCTTTTTTgct  
cgagctggcgaattcc  
>CD\_NM\_000324.1:640  
CgCctGcgagtctGGtatGCCTACTCAGACTTGTTCGCAATTTCAAGAGAATTGCAAACAAGTCTGAGTAGTTTTTgct  
cgagctggcgaattcc  
>CD\_NM\_000324.1:1057  
CgCctGcgagtctGGtatGAAGGCATTGTGGCAGTAGCAATTTCAAGAGAATTGCTACTGCCACAATGCCTGTTTTGct  
cgagctggcgaattcc  
>CD\_NM\_000324.1:1117  
CgCctGcgagtctGGtatGAACTGGGTTCCTCTATCGGAACTTCAAGAGAGTTCCGATAGAGGAACCCAGTTTTTGct  
cgagctggcgaattcc  
>CD\_NM\_000324.1:523  
CgCctGcgagtctGGtatGATGACATTGGAGCATCAATGACTTCAAGAGAGTCATTGATGCTCCAATGTCAGTTTTGct  
cgagctggcgaattcc  
>CD\_NM\_000324.1:173  
CgCctGcgagtctGGtatGATTATATCCTCTGTTCCAAGATTTCAAGAGAATCTTGAACAGAGGATATAACTTTTTGct  
cgagctggcgaattcc  
>CD\_NM\_000324.1:591  
CgCctGcgagtctGGtatGCTGTATCGATCTGGACTGAGAATTTCAAGAGATTCTCAGTCCAGATCGATACAATTTTTGct  
cgagctggcgaattcc  
>CD\_NM\_000324.1:519  
CgCctGcgagtctGGtatGACCTCTGACATTGGAGCATCAATTTCAAGAGATTGATGCTCCAATGTCAGAGGCTTTTTGct  
cgagctggcgaattcc  
>CD\_NM\_000324.1:1209

CgCtGcgagtctGGtatGCACTGCTATGATGATTCTGTTTTTCAAGAGAAAACAGAATCATCATAGCAGTTTTTTTGct  
cgagctggcgaattcc  
>CD\_NM\_000324.1:881  
CgCtGcgagtctGGtatGCTGTGCGGATATGGCAATTCACCTCAAGAGAGTGAATTGCCATATCCGCACAATTTTTTGct  
cgagctggcgaattcc  
>CD\_NM\_000324.1:226  
CgCtGcgagtctGGtatGCCCTCATGACCTTCCTGAAGAATTCAGAGATTCTTCAGGAAGGTCATGAGGATTTTTTGct  
cgagctggcgaattcc  
>CD\_NM\_000324.1:157  
CgCtGcgagtctGGtatGCGGGCATATTCCTTGAGTTATATTCAAGAGATATAACTCAAAGAATATGCCCATTTTTTGct  
cgagctggcgaattcc  
>CD\_NM\_000324.1:668  
CgCtGcgagtctGGtatGAACTCTCTTCTGTGGATGTTTTTCAAGAGAAAACATCCACAGAAAGAGAGTCTTTTTTGct  
cgagctggcgaattcc  
>CD\_NM\_000324.1:149  
CgCtGcgagtctGGtatGCACAGACATGGGCATATTCCTTTTTCAAGAGAAAAGAATATGCCCATGTCTGTTTTTTTGct  
cgagctggcgaattcc  
>CD\_NM\_000324.1:1217  
CgCtGcgagtctGGtatGCGATGATTCTGTTTATTGGAAGTTCAAGAGACTTCCAATAAACAGAATCATCATTTTTTGct  
cgagctggcgaattcc  
>CD\_NM\_000324.1:1013  
CgCtGcgagtctGGtatGAGTCCATAACCTCCACGGCTTATTCAAGAGATAAGCCGTGGAGGTTATGGACCTTTTTTGct  
cgagctggcgaattcc  
>CD\_NM\_000324.1:227  
CgCtGcgagtctGGtatGACTCATGACCTTCCTGAAGAAATTCAGAGATTTCTTCAGGAAGGTCATGAGGTTTTTGct  
cgagctggcgaattcc  
>CD\_NM\_000324.1:495  
CgCtGcgagtctGGtatGCACCTGGTTAGTGAAATATTTATTCAAGAGATAAATATTTCACTAACAGGTATTTTTTGct  
cgagctggcgaattcc  
>CD\_NM\_000324.1:1160  
CgCtGcgagtctGGtatGAACAGGTTTAAATCTAAAGTTGTTCAAGAGACAACCTTAGAATTAACCTGTCTTTTTTGct  
cgagctggcgaattcc  
>CD\_NM\_000324.1:130  
CgCtGcgagtctGGtatGCGCTCAACATCACCAAGCCAACCTCAAGAGAGTTGGCTTGGTGATGTTGAGCTTTTTTGct  
cgagctggcgaattcc  
>CD\_NM\_001544:346  
CgCtGcgagtctGGtatGCGCCTCGTGACCTGCGCAGGAATTCAGAGATTCTGCGCAGGTCACGAGGCATTTTTTGct  
cgagctggcgaattcc  
>CD\_NM\_001544:432  
CgCtGcgagtctGGtatGCCCGGTCTTAAAGGGCAGGAAATTCAGAGATTTCTGCCCCTTAAAGACCGGATTTTTTGct  
cgagctggcgaattcc  
>CD\_NM\_001544:433  
CgCtGcgagtctGGtatGACGGTCTTAAAGGGCAGGAAATTCAGAGAAATTTCTGCCCCTTAAAGACCGGTTTTTGct  
cgagctggcgaattcc  
>CD\_NM\_001544:514  
CgCtGcgagtctGGtatGCGGCATGGAAGCCGGGTCATCTTTCAAGAGAAGATGACCCGGCTTCCATGCCTTTTTTGct  
cgagctggcgaattcc  
>CD\_NM\_001544:522  
CgCtGcgagtctGGtatGCAGCCGGGTCATCTATTCCGAATTCAGAGATTCGGAATAGATGACCCGGCTTTTTTTGct  
cgagctggcgaattcc  
>CD\_NM\_001544:577  
CgCtGcgagtctGGtatGCACGTGACCTTGACCTACGAGTTTTCAAGAGAACTCGTAGGTCAAGGTCACGTTTTTTTGct  
cgagctggcgaattcc  
>CD\_NM\_001544:431

CgCctGcgagtctGGtatGATCCGGTCTTAAAGGGCAGGAATTCAAGAGATTCCTGCCCTTTAAGACCGGAGTTTTTGct  
cgagctggcgaattcc  
>CD\_NM\_001544.2:787  
CgCctGcgagtctGGtatGCCCTATGCAAGTGCCTAGCTATTTCAAGAGAATAGCTAGGCACTTGCATAGGTTTTTTGct  
cgagctggcgaattcc  
>CD\_NM\_001544.2:433  
CgCctGcgagtctGGtatGAGGTCTTAAAGGGCAGGAAATATTCAAGAGATATTTTCCTGCCCTTTAAGACCGTTTTTGct  
cgagctggcgaattcc  
>CD\_NM\_001544.2:346  
CgCctGcgagtctGGtatGACCTCGTGACCTGCGCAGGAAATTCAAGAGATTTTCCTGCGCAGGTCACGAGGCTTTTTGct  
cgagctggcgaattcc  
>CD\_NM\_001544.2:523  
CgCctGcgagtctGGtatGACCGGGTCATCTATTCCGAAAGTTCAAGAGACTTTCGGAATAGATGACCCGGCTTTTTGct  
cgagctggcgaattcc  
>CD\_NM\_001544.2:202  
CgCctGcgagtctGGtatGCGCAGCTCAATTGCAGCAACAGTTCAAGAGACTGTTGCTGCAATTGAGCTGCATTTTTGct  
cgagctggcgaattcc  
>CD\_NM\_001544.2:588  
CgCctGcgagtctGGtatGCCCTACGAGTTTGCTGCTGGACTTCAAGAGAGTCCAGCAGCAAACCTCGTAGGTTTTTTGct  
cgagctggcgaattcc  
>CD\_NM\_001544.2:620  
CgCctGcgagtctGGtatGATGGCAGCCCGTGATCTGCCACTTCAAGAGAGTGGCAGATCACGGGCTGCCAGTTTTTGct  
cgagctggcgaattcc  
>CD\_NM\_001544.2:422  
CgCctGcgagtctGGtatGCTTGGAGCCTCCGGTCTTAAAGTTCAAGAGACTTTAAGACCGGAGGCTCCAAATTTTTGct  
cgagctggcgaattcc  
>CD\_NM\_001544.2:644  
CgCctGcgagtctGGtatGACGCCTCAATCTCGACGGCCTGTTCAAGAGACAGGCCGTCGAGATTGAGGCGTTTTTTGct  
cgagctggcgaattcc  
>CD\_NM\_001544.2:334  
CgCctGcgagtctGGtatGACCTCGCGCACTGCCTCGTGACTTCAAGAGAGTCACGAGGCAGTGC GCGAGGGTTTTTTGct  
cgagctggcgaattcc  
>CD\_NM\_001544.2:85  
CgCctGcgagtctGGtatGACCGGACTAAGCGGGCGCAAAGTTCAAGAGACTTTGCGCCCGCTTAGTCCGGCTTTTTTTGct  
cgagctggcgaattcc  
>CD\_NM\_001544.2:502  
CgCctGcgagtctGGtatGCGGTGACCCTGAGGCATGGAAGTTCAAGAGACTTCCATGCCTCAGGGTCACCATTTTTTTGct  
cgagctggcgaattcc  
>CD\_NM\_001544.2:284  
CgCctGcgagtctGGtatGCGGGCCGGGTTGGGTGTCTTACTTCAAGAGAGTAAGACACCCAACCCGGCCCTTTTTTTGct  
cgagctggcgaattcc  
>CD\_NM\_001544.2:74  
CgCctGcgagtctGGtatGAGCGCTGGGACGCCGACTAAGTTCAAGAGACTTAGTCCGGCGTCCCAGCGCGTTTTTTGct  
cgagctggcgaattcc  
>CD\_NM\_001544.2:427  
CgCctGcgagtctGGtatGCGCCTCCGGTCTTAAAGGGCAGTTCAAGAGACTGCCCTTTAAGACCGGAGGCTTTTTTTGct  
cgagctggcgaattcc  
>CD\_NM\_001544.2:562  
CgCctGcgagtctGGtatGACCTGGATCTGGCCAACGTGACTTCAAGAGAGTCACGTTGGCCAGATCCAGGCTTTTTTTGct  
cgagctggcgaattcc  
>CD\_NM\_001544.2:167  
CgCctGcgagtctGGtatGACCGGAGTTCGTGGCTGTGCAGTTCAAGAGACTGCACAGCCACGAACTCCGGGTTTTTTGct  
cgagctggcgaattcc  
>CD\_NM\_001544.2:299

CgCctGcgagtctGGtatGATCTTACCAGCTGCTCGACGTGTTCAAGAGACACGTCGAGCAGCTGGTAAGACTTTTTTGct  
cgagctggcgaattcc  
>CD\_NM\_001544.2:373  
CgCctGcgagtctGGtatGACTGGGCCACCTCCAGGATCACTTCAAGAGAGTGATCCTGGAGGTGGCCAGCTTTTTTGct  
cgagctggcgaattcc  
>CD\_NM\_001544.2:577  
CgCctGcgagtctGGtatGCCGTGACCTTGACCTACGAGTTTTCAAGAGAACTCGTAGGTCAAGGTCACGTTTTTTGct  
cgagctggcgaattcc  
>CD\_NM\_001544.2:560  
CgCctGcgagtctGGtatGAGGCCTGGATCTGGCCAACGTGTTCAAGAGACACGTTGGCCAGATCCAGGCCGTTTTTGct  
cgagctggcgaattcc  
>CD\_NM\_001544.2:803  
CgCctGcgagtctGGtatGCGCTATGAAGTCCCAGGCGTAATTCAAGAGATTACGCCTGGGACTTCATAGCTTTTTTGct  
cgagctggcgaattcc  
>CD\_NM\_001544.2:522  
CgCctGcgagtctGGtatGCGCCGGGTCATCTATTCCGAAATTCAAGAGATTTCCGGAATAGATGACCCGGCTTTTTTGct  
cgagctggcgaattcc  
>CD\_NM\_001544.2:287  
CgCctGcgagtctGGtatGACCGGGTTGGGTGTCTTACCAGTTCAAGAGACTGGTAAGACACCCAACCCGGCTTTTTTGct  
cgagctggcgaattcc  
>CD\_NM\_001544.2:797  
CgCctGcgagtctGGtatGATGCCTAGCTATGAAGTCCCAGTTCAAGAGACTGGGACTTCATAGCTAGGCACTTTTTGct  
cgagctggcgaattcc  
>CD\_NM\_001544.2:142  
CgCctGcgagtctGGtatGAAGTGCCCTTCTGGGTGCGCATTTCAAGAGAATGCGCACCCAGAAGGGCACTGTTTTTGct  
cgagctggcgaattcc  
>CD\_NM\_000927:1500  
CgCctGcgagtctGGtatGAAGCTTATGAAATCTTCAAGATTTCAAGAGAATCTGAAGATTTCATAAGCTGTTTTTGct  
cgagctggcgaattcc  
>CD\_NM\_000927:1569  
CgCctGcgagtctGGtatGCACCAGATAATATTAAGGGAAATTCAAGAGATTTCCCTTAATATTATCTGGTTTTTTGct  
cgagctggcgaattcc  
>CD\_NM\_000927:1941  
CgCctGcgagtctGGtatGCTGCCTATGACTTTATCATGAATTCAAGAGATTCATGATAAAGTCATAGGCATTTTTTGct  
cgagctggcgaattcc  
>CD\_NM\_000927:2872  
CgCctGcgagtctGGtatGAGCCAATGATGCTGCTCAAGTTTTCAAGAGAACTTGAGCAGCATCATTGGCGTTTTTGct  
cgagctggcgaattcc  
>CD\_NM\_000927:3297  
CgCctGcgagtctGGtatGAAGCCTACTTGGTGGCACATAATTCAAGAGATTATGTGCCACCAAGTAGGCTTTTTTGct  
cgagctggcgaattcc  
>CD\_NM\_000927:3432  
CgCctGcgagtctGGtatGAAGCCCACATCATCATGATCATTTCAGAGAATGATCATGATGATGTGGGCTGTTTTTGct  
cgagctggcgaattcc  
>CD\_NM\_000927:3402  
CgCctGcgagtctGGtatGATCCTGACTATGCCAAAGCCAATTCAAGAGATTGGCTTTGGCATAAGTCAGGAGTTTTTGct  
cgagctggcgaattcc  
>CD\_NM\_000927:3309  
CgCctGcgagtctGGtatGCGGCACATAAACTCATGAGCTTTTTCAAGAGAAAGCTCATGAGTTTATGTGCCATTTTTTGct  
cgagctggcgaattcc  
>CD\_NM\_000927:2661  
CgCctGcgagtctGGtatGCACGACAGAATAGTAACTTGTTTTTCAAGAGAAACAAGTTACTATTCTGTCGTTTTTTGct  
cgagctggcgaattcc  
>CD\_NM\_000927:3698



CgCctGcgagtctGGtatGATGCTGCTTGATGGCAAAGAAATTCAAGAGATTTCTTTGCCATCAAGCAGCACTTTTTTGct  
cgagctggcgaattcc  
>CD\_NM\_000927.3:1569  
CgCctGcgagtctGGtatGCCAGATAATATTAAGGGAAATTTCAAGAGAATTTCCCTTAATATTATCTGGTTTTTTTGct  
cgagctggcgaattcc  
>CD\_NM\_000927.3:3309  
CgCctGcgagtctGGtatGAGCACATAAACTCATGAGCTTTTTCAAGAGAAAAGCTCATGAGTTTATGTGCCTTTTTTGct  
cgagctggcgaattcc  
>CD\_NM\_000927.3:3687  
CgCctGcgagtctGGtatGAGCAGGGAAAAGTGCTGCTTGATTTCAAGAGAATCAAGCAGCACTTTCCCTGCCTTTTTTGct  
cgagctggcgaattcc  
>CD\_NM\_000927.3:3402  
CgCctGcgagtctGGtatGCCCTGACTATGCCAAAGCCAAATTTCAAGAGATTTGGCTTTGGCATAGTCAGGATTTTTTGct  
cgagctggcgaattcc  
>CD\_NM\_000927.3:3520  
CgCctGcgagtctGGtatGATCACATTTGGTGAAGTTGTATTTCAAGAGAATACAAC TTCACCAAATGTGACTTTTTTGct  
cgagctggcgaattcc  
>CD\_NM\_000927.3:2374  
CgCctGcgagtctGGtatGCTGTCTTCAAATGATTCAAGATTTCAAGAGAATCTTGAATCATTTGAAGACATTTTTTGct  
cgagctggcgaattcc  
>CD\_NM\_000927.3:669  
CgCctGcgagtctGGtatGCTTAGAAGATCTGATGTCAAACCTTCAAGAGAGTTTGACATCAGATCTTCTAAATTTTTTGct  
cgagctggcgaattcc  
>CD\_NM\_000927.3:1957  
CgCctGcgagtctGGtatGCTGAAACTGCCCTATAAATTTGTTCAAGAGACAAATTTATGAGGCAGTTTCATTTTTTGct  
cgagctggcgaattcc  
>CD\_NM\_000927.3:2473  
CgCctGcgagtctGGtatGAAGGCTCTGGATGAAAGTATACTTCAAGAGAGTATACTTTCATCCAGAGCCTTTTTTGct  
cgagctggcgaattcc  
>CD\_NM\_000927.3:2988  
CgCctGcgagtctGGtatGCACACTGTTACTCTTAGCAATTTTCAAGAGAAATTGCTAAGAGTAACAGTGTTTTTTTGct  
cgagctggcgaattcc  
>CD\_NM\_000927.3:3197  
CgCctGcgagtctGGtatGAATACAGAACTCTTTGAGGAATTTCAAGAGATTCCTCAAAGAGTTTCTGTATGTTTTTTGct  
cgagctggcgaattcc  
>CD\_NM\_000927.3:3057  
CgCctGcgagtctGGtatGCGGACAAGCACTGAAAGATAAGTTCAAGAGACTTATCTTTTCAGTGCTTGTCCATTTTTTGct  
cgagctggcgaattcc  
>CD\_NM\_000927.3:1317  
CgCctGcgagtctGGtatGCGCTGCTTTCCCTGCTGATCTATTTCAAGAGAATAGATCAGCAGGAAAAGCAGCATTTTTTGct  
cgagctggcgaattcc  
>CD\_NM\_000927.3:1680  
CgCctGcgagtctGGtatGAACGGTGGCCCTGGTTGGAACTTCAAGAGAGTTTCCAACCAGGGCCACCGTCTTTTTTGct  
cgagctggcgaattcc  
>CD\_NM\_000927.3:2239  
CgCctGcgagtctGGtatGAAGAAAGGAAATCATGATGAACTTCAAGAGAGTTCATCATGATTTCTTTCTTTTTTGct  
cgagctggcgaattcc  
>CD\_NM\_000927.3:992  
CgCctGcgagtctGGtatGCGTTCTTTTCAGTCAATGGCAACTTCAAGAGAGTTGCCATTGACTGAAAGAACATTTTTTGct  
cgagctggcgaattcc  
>CD\_NM\_000927.3:674  
CgCctGcgagtctGGtatGCAGATCTGATGTCAAACATCACTTCAAGAGAGTGATGTTTGACATCAGATCTTTTTTTGct  
cgagctggcgaattcc  
>CD\_NM\_000927.3:2157

CgCctGcgagtctGGtatGAACCACCATTGTGATAGCTCATTTC AAGAGAATGAGCTATCACAATGGTGGTCTTTTTTGct  
cgagctggcgaattcc  
>CD\_NM\_000927.3:1650  
CgCctGcgagtctGGtatGAGGTCTGAACCTGAAGGTGCAGTTC AAGAGACTGCACCTTCAGGTTTCAGACCCTTTTTTGct  
cgagctggcgaattcc  
>CD\_NM\_000927.3:3579  
CgCctGcgagtctGGtatGAGGACTGAGCCTGGAGGTGAAGTTC AAGAGACTTCACCTCCAGGCTCAGTCCCTTTTTTGct  
cgagctggcgaattcc  
>CD\_NM\_000927.3:3888  
CgCctGcgagtctGGtatGAATCGAGTCACTGCCTAATAAATTCA AAGAGATTTATTAGGCAGTGACTCGATGTTTTTGct  
cgagctggcgaattcc  
>CD\_NM\_000927.3:2425  
CgCctGcgagtctGGtatGCGGAGTGTCCGTGGATCACAAGTTC AAGAGACTTGTGATCCACGGACACTCCCTTTTTTGct  
cgagctggcgaattcc  
>CD\_NM\_000927.3:2808  
CgCctGcgagtctGGtatGAAGACAGGATGTGAGTTGGTTTTTC AAGAGAAAACCAACTCACATCCTGTCTGTTTTTGct  
cgagctggcgaattcc  
>CD\_NM\_016382:1162  
CgCctGcgagtctGGtatGAAGCCCTTCCTTCAATAGCACTTTC AAGAGAAGTGCTATTGAAGGAAGGGCTGTTTTTGct  
cgagctggcgaattcc  
>CD\_NM\_016382:1247  
CgCctGcgagtctGGtatGAAGCTGGAGAACTTTGATGTTTTTTC AAGAGAAAACATCAAAGTTCTCCAGCTCTTTTTTGct  
cgagctggcgaattcc  
>CD\_NM\_016382.2:252  
CgCctGcgagtctGGtatGCGCTGACCATGTGGTTAGCATCTTTC AAGAGAGATGCTAACCCACATGGTCAGCTTTTTTGct  
cgagctggcgaattcc  
>CD\_NM\_016382.2:274  
CgCctGcgagtctGGtatGCCGGGAGTGCCCTTCAGTTACTTTC AAGAGAGTAACTGAAGAGGCACTCCCGATTTTTTGct  
cgagctggcgaattcc  
>CD\_NM\_016382.2:1157  
CgCctGcgagtctGGtatGCCACAGCCCTTCCTTCAATAGTTTC AAGAGACTATTGAAGGAAGGGCTGTGGTTTTTTGct  
cgagctggcgaattcc  
>CD\_NM\_016382.2:1182  
CgCctGcgagtctGGtatGCATCTATGAAGTGATTGGAAAGTTC AAGAGACTTCCAATCACTTCATAGATATTTTTTGct  
cgagctggcgaattcc  
>CD\_NM\_016382.2:792  
CgCctGcgagtctGGtatGAACCCTGAATCTCACTCAGGACTTTC AAGAGAGTCCCTGAGTGAGATTCAGGGTGTTTTTTGct  
cgagctggcgaattcc  
>CD\_NM\_016382.2:902  
CgCctGcgagtctGGtatGACTTCTGTGTGTGGAGGAGAAATTC AAGAGATTTCTCCTCCACACACAGAAGCTTTTTTGct  
cgagctggcgaattcc  
>CD\_NM\_016382.2:360  
CgCctGcgagtctGGtatGCGGATTTTCATCACATATTGAAGTTC AAGAGACTTCAATATGTGATGAAATCCATTTTTTGct  
cgagctggcgaattcc  
>CD\_NM\_016382.2:854  
CgCctGcgagtctGGtatGCGGTGATCATCGTGATTCTAAGTTC AAGAGACTTAGAATCACGATGATCACCATTTTTTGct  
cgagctggcgaattcc  
>CD\_NM\_016382.2:813  
CgCctGcgagtctGGtatGATGTCAGAAATGCCATCAGGAATTC AAGAGATTCCTGATGGGCATTCTGACAGTTTTTTGct  
cgagctggcgaattcc  
>CD\_NM\_016382.2:320  
CgCctGcgagtctGGtatGCTGACAGCATTGCATGGAAGAATTC AAGAGATTCCTCCATGCAATGCTGTCAATTTTTTGct  
cgagctggcgaattcc  
>CD\_NM\_016382.2:276

CgCctGcgagtctGGtatGAGGAGTGCCCTTTCAGTTACAATTCAAGAGATTGTAAGTGAAGAGGCACTCCCTTTTTGct  
cgagctggcgaattcc  
>CD\_NM\_016382.2:647  
CgCctGcgagtctGGtatGCTGGCAATGTGTCTATGCTTGTTCAGGACAAGCATAGGACACATTGCCATTTTTGct  
cgagctggcgaattcc  
>CD\_NM\_016382.2:389  
CgCctGcgagtctGGtatGCTGGCTCTTTGCCCTTCCAATACTTCAAGAGAGTATTGGAAGGCAAAGAGCCATTTTTGct  
cgagctggcgaattcc  
>CD\_NM\_016382.2:1177  
CgCctGcgagtctGGtatGCGCACTATCTATGAAGTGATTGTTCAAGAGACAATCACTTCATAGATAGTGCTTTTTGct  
cgagctggcgaattcc  
>CD\_NM\_016382.2:401  
CgCctGcgagtctGGtatGATTCCAATACTTCCAATGATAGTTCAAGAGACTATCATTGGAAGTATTGGAAGTTTTGct  
cgagctggcgaattcc  
>CD\_NM\_016382.2:201  
CgCctGcgagtctGGtatGAATACTCCTCCTGCTCCTCAAGTTCAAGAGACTTGAGGAGCAGGAGGAGTATGTTTTGct  
cgagctggcgaattcc  
>CD\_NM\_016382.2:217  
CgCctGcgagtctGGtatGATCAAGGTGTATCAGGGCAAAGTTCAAGAGACTTTGCCCTGATACACCTTGAGTTTTGct  
cgagctggcgaattcc  
>CD\_NM\_016382.2:1248  
CgCctGcgagtctGGtatGACTGGAGAACTTTGATGTTTTATTTCAAGAGAATAAACATCAAAGTTCTCCAGCTTTTTGct  
cgagctggcgaattcc  
>CD\_NM\_016382.2:282  
CgCctGcgagtctGGtatGACCTCTTCAGTTACAACCAAACCTTCAAGAGAGTTTGGTTGTAAGTGAAGAGGCTTTTTGct  
cgagctggcgaattcc  
>CD\_NM\_016382.2:1195  
CgCctGcgagtctGGtatGCTTGAAAGAGTCAACCTAAAGTTCAAGAGACTTTAGGTTGACTCTTTCCAATTTTTGct  
cgagctggcgaattcc  
>CD\_NM\_016382.2:492  
CgCctGcgagtctGGtatGATGCCTGGAGGTCACCAGTATATTCAAGAGATATACTGGTGACCTCCAGGCAGTTTTGct  
cgagctggcgaattcc  
>CD\_NM\_016382.2:1236  
CgCctGcgagtctGGtatGAAGCCGCAAAGAGCTGGAGAACTTCAAGAGAGTTCTCCAGCTCTTTGCGGCTTTTTGct  
cgagctggcgaattcc  
>CD\_NM\_016382.2:207  
CgCctGcgagtctGGtatGACTCCTGCTCCTCAAGGTGTATTTCAAGAGAATACACCTTGAGGAGCAGGAGTTTTGct  
cgagctggcgaattcc  
>CD\_NM\_016382.2:1167  
CgCctGcgagtctGGtatGCTCCTTCAATAGCACTATCTATTTCAAGAGAATAGATAGTGCTATTGAAGGAATTTTTGct  
cgagctggcgaattcc  
>CD\_NM\_016382.2:1069  
CgCctGcgagtctGGtatGAAGTCTTCTGCTCCCACGTCACCTTCAAGAGAGTGACGTGGGAGCAGAAGACTGTTTTGct  
cgagctggcgaattcc  
>CD\_NM\_016382.2:896  
CgCctGcgagtctGGtatGCTGCCTGCTTCTGTGTGTGGAGTTCAAGAGACTCCACACACAGAAGCAGGCAATTTTTGct  
cgagctggcgaattcc  
>CD\_NM\_016382.2:287  
CgCctGcgagtctGGtatGCTCAGTTACAACCAAACAGCATTTCAGAGAATGCTGTTTGGTTGTAAGTGAATTTTTGct  
cgagctggcgaattcc  
>CD\_NM\_016382.2:728  
CgCctGcgagtctGGtatGCTGACATTAATGGCACTCACACTTCAAGAGAGTGTGAGTGCCATTAATGTCAATTTTTGct  
cgagctggcgaattcc  
>CD\_NM\_016382.2:1084

CgCtGcgagtctGGtatGCCGTCACAAGAACCTGCATATATTCAAGAGATATATGCAGGTTCTTGTGACGTTTTTTGct  
cgagctggcgaattcc  
>CD\_NM\_016382.2:383  
CgCtGcgagtctGGtatGAGGAGAATGGCTCTTTGCCTTCTTCAAGAGAGAAGGCAAAGAGCCATTCTCCTTTTTTGct  
cgagctggcgaattcc  
>CD\_NM\_016382.2:195  
CgCtGcgagtctGGtatGAACCTCATACTCCTCCTGCTCTTCAAGAGAGAGCAGGAGGAGTATGAGGGTGTTTTTGct  
cgagctggcgaattcc  
>CD\_NM\_004304:2867  
CgCtGcgagtctGGtatGCACCTGTTTGAGAGAAACCCAATTCAAGAGATTGGGTTTCTCTCAAACAGGTTTTTTGct  
cgagctggcgaattcc  
>CD\_NM\_004304:1604  
CgCtGcgagtctGGtatGCTGCCTTCTCCTTCTCCTGATTTTTCAAGAGAAATCAGGAGAAGGAGAAGGCATTTTTTTGct  
cgagctggcgaattcc  
>CD\_NM\_004304:4811  
CgCtGcgagtctGGtatGCTGGAAGGAATATTCACCTTCTATTCAAGAGATAGAAGTGAATATTCCTTCCATTTTTTTGct  
cgagctggcgaattcc  
>CD\_NM\_004304:3722  
CgCtGcgagtctGGtatGAGCGGCAATGCAGCCTCAAACATTCAAGAGATGTTTGAGGCTGCATTGCCGCTTTTTTTGct  
cgagctggcgaattcc  
>CD\_NM\_004304:5062  
CgCtGcgagtctGGtatGATGCACCCAGGACCCGGATGTATTCAAGAGATACATCCGGGTCCTGGGTGCAGTTTTTTGct  
cgagctggcgaattcc  
>CD\_NM\_004304.3:3477  
CgCtGcgagtctGGtatGACCAGAGAGACTGGAGAATAACTTCAAGAGAGTTATTCTCCAGTCTCTCTGGGTTTTTTGct  
cgagctggcgaattcc  
>CD\_NM\_004304.3:2552  
CgCtGcgagtctGGtatGCGCTCCGAATGTCCTGGCTCATTTCAAGAGAATGAGCCAGGACATTCGGAGCTTTTTTTGct  
cgagctggcgaattcc  
>CD\_NM\_004304.3:4409  
CgCtGcgagtctGGtatGACCTGATCATCAGCAAATTCAATTCAAGAGATTGAATTTGCTGATGATCAGGGTTTTTTGct  
cgagctggcgaattcc  
>CD\_NM\_004304.3:5586  
CgCtGcgagtctGGtatGCTCGCTGACTGCCAATATGAAGTTCAAGAGACTTCATATTGGCAGTCAGCGAATTTTTTTGct  
cgagctggcgaattcc  
>CD\_NM\_004304.3:4658  
CgCtGcgagtctGGtatGATGCCAGAACTGCCTCTTGACTTCAAGAGAGTCAAGAGGCAGTTTCTGGCAGTTTTTTGct  
cgagctggcgaattcc  
>CD\_NM\_004304.3:1740  
CgCtGcgagtctGGtatGCCACTGCATGACCTCAGGAACCTTCAAGAGAGTTCTGAGGTCATGCAGTGGATTTTTTTGct  
cgagctggcgaattcc  
>CD\_NM\_004304.3:3171  
CgCtGcgagtctGGtatGAGGCGTGTCTGTGCTGGGCATCTTCAAGAGAGATGCCAGCACAGACACGCCGTTTTTTGct  
cgagctggcgaattcc  
>CD\_NM\_004304.3:3906  
CgCtGcgagtctGGtatGCAGCCACAAGGTCATCTGCTTCTTCAAGAGAGAAGCAGATGACCTTGTGGCTTTTTTTGct  
cgagctggcgaattcc  
>CD\_NM\_004304.3:4007  
CgCtGcgagtctGGtatGAGCTGATCCTCTCTGTGGTGACTTCAAGAGAGTACCACAGAGAGGATCAGCGTTTTTTGct  
cgagctggcgaattcc  
>CD\_NM\_004304.3:4645  
CgCtGcgagtctGGtatGAACCGAGACATTGCTGCCAGAATTCAAGAGATTCTGGCAGCAATGTCTCGGTGTTTTTTTGct  
cgagctggcgaattcc  
>CD\_NM\_004304.3:1606

CgCctGcgagtctGGtatGACTTCTCCTTCTCCTGATTATTTTTCAAGAGAAATAATCAGGAGAAGGAGAAGGTTTTTgct  
cgagctggcgaattcc  
>CD\_NM\_004304.3:4062  
CgCctGcgagtctGGtatGATCCGGCATCATGATTGTGTACTTCAAGAGAGTACACAATCATGATGCCGAGTTTTTgct  
cgagctggcgaattcc  
>CD\_NM\_004304.3:5088  
CgCctGcgagtctGGtatGAACCGCTTTGCCGATAGAATATTTCAAGAGAAATATCTATCGGCAAAGCGGTGTTTTTgct  
cgagctggcgaattcc  
>CD\_NM\_004304.3:1857  
CgCctGcgagtctGGtatGCGGCTCCTTTCTCCTTCTCAACTTCAAGAGAGTTGAGAAGGAGAAAGGAGCCTTTTTgct  
cgagctggcgaattcc  
>CD\_NM\_004304.3:4767  
CgCctGcgagtctGGtatGATGTGCCATGCTGCCAGTTAAGTTCAAGAGACTTAACTGGCAGCATGGCACAGTTTTTgct  
cgagctggcgaattcc  
>CD\_NM\_004304.3:5517  
CgCctGcgagtctGGtatGCAGCTGTACTGTCCCACCTAACTTCAAGAGAGTTAGGTGGGACAGTACAGCTTTTTTgct  
cgagctggcgaattcc  
>CD\_NM\_004304.3:1904  
CgCctGcgagtctGGtatGCCCTGAGTCCGTGGATGAGGAGTTCAAGAGACTCCTCATCCACGGACTCAGGATTTTTgct  
cgagctggcgaattcc  
>CD\_NM\_004304.3:3294  
CgCctGcgagtctGGtatGCGAGAACAATGTGATAGAAGAATTCAAGAGATTCTTCTATCACATTGTTCTTTTTTgct  
cgagctggcgaattcc  
>CD\_NM\_004304.3:2867  
CgCctGcgagtctGGtatGCCCTGTTTGAGAGAAACCCAAATTCAAGAGATTTGGGTTTCTCTCAAACAGGTTTTTgct  
cgagctggcgaattcc  
>CD\_NM\_004304.3:2539  
CgCctGcgagtctGGtatGCGCTCTCCATGTGAGCTCCGAATTCAAGAGATTCGGAGCTCACATGGAGAGCTTTTTTgct  
cgagctggcgaattcc  
>CD\_NM\_004304.3:4131  
CgCctGcgagtctGGtatGACCTGAGTACAAGCTGAGCAAGTTCAAGAGACTTGCTCAGCTTGTACTCAGGGTTTTTgct  
cgagctggcgaattcc  
>CD\_NM\_004304.3:2221  
CgCctGcgagtctGGtatGCGCTCCTTCACTTGTGGAATGTTCAAGAGACATTCACAAGTGAAGGAGCTTTTTTgct  
cgagctggcgaattcc  
>CD\_NM\_004304.3:5098  
CgCctGcgagtctGGtatGACGATAGAATATGGTCCACTTGTTC AAGAGACAAGTGGACCATATCTATCGGTTTTTgct  
cgagctggcgaattcc  
>CD\_NM\_004304.3:3462  
CgCctGcgagtctGGtatGAACAGACACGTTCCACCCAGAGTTCAAGAGACTCTGGGTGGAACGTGTCTGTCTTTTTTgct  
cgagctggcgaattcc  
>CD\_NM\_004304.3:4612  
CgCctGcgagtctGGtatGAGCTGTCAGTATTTGGAGGAAATTCAAGAGATTTCTCCAAATACTGACAGCCTTTTTTgct  
cgagctggcgaattcc  
>CD\_NM\_004304.3:1947  
CgCctGcgagtctGGtatGAGCCGTCTCGGTGCACAGGCACTTCAAGAGAGTGCCTGTGCACCGAGACGGCCTTTTTTgct  
cgagctggcgaattcc  
>CD\_NM\_004304.3:1056  
CgCctGcgagtctGGtatGAAGGAAGAGTCTGGCAGTTGACTTCAAGAGAGTCAACTGCCAGACTCTTCTCTTTTTTgct  
cgagctggcgaattcc  
>CD\_NM\_004304.3:3867  
CgCctGcgagtctGGtatGAAGTCACTGTGAGGTAGACGAATTCAAGAGATTCGTCTACCTCACAGTGACTTTTTTgct  
cgagctggcgaattcc  
>CD\_NM\_000734:227

CgCctGcgagtctGGtatGATGGATGGAATCCTCTTCATCTTTCAAGAGAAGATGAAGAGGATTCCATCCAGTTTTTGct  
cgagctggcgaattcc  
>CD\_NM\_198053.1:321  
CgCctGcgagtctGGtatGAGGCCAGAACCAGCTCTATAACTTCAAGAGAGTTATAGAGCTGGTTCTGGCCTTTTTGct  
cgagctggcgaattcc  
>CD\_NM\_198053.1:490  
CgCctGcgagtctGGtatGCACAGTGAGATTGGGATGAAAGTTCAAGAGACTTTCATCCCAATCTCACTGTATTTTTGct  
cgagctggcgaattcc  
>CD\_NM\_198053.1:257  
CgCctGcgagtctGGtatGCTCTCACTGCCTTGTTCTGAGTTCAAGAGACTCAGGAACAAGGCAGTGAGAATTTTTGct  
cgagctggcgaattcc  
>CD\_NM\_198053.1:162  
CgCctGcgagtctGGtatGAGCACAGTTGCCGATTACAGAGTTCAAGAGACTCTGTAATCGGCAACTGTGCCTTTTTGct  
cgagctggcgaattcc  
>CD\_NM\_198053.1:438  
CgCctGcgagtctGGtatGACCTCAGGAAGGCCGTGACAATTTCAAGAGAATTGTACAGGCCTTCTGAGGGTTTTGct  
cgagctggcgaattcc  
>CD\_NM\_198053.1:264  
CgCctGcgagtctGGtatGCGCCTTGTTCTGAGAGTGAAGTTCAAGAGACTTCACTCTCAGGAACAAGGCATTTTTGct  
cgagctggcgaattcc  
>CD\_NM\_198053.1:249  
CgCctGcgagtctGGtatGCGGTGTCATTCTCACTGCCTTGTTCAAGAGACAAGGCAGTGAGAATGACACCATTTTTGct  
cgagctggcgaattcc  
>CD\_NM\_198053.1:486  
CgCctGcgagtctGGtatGAGCCTACAGTGAGATTGGGATGTTCAAGAGACATCCCAATCTCACTGTAGGCCTTTTTGct  
cgagctggcgaattcc  
>CD\_NM\_198053.1:158  
CgCctGcgagtctGGtatGCGCAGGCACAGTTGCCGATTACTTCAAGAGAGTAATCGGCAACTGTGCCTGCATTTTTGct  
cgagctggcgaattcc  
>CD\_NM\_198053.1:147  
CgCctGcgagtctGGtatGAGCGGCCATCTGCAGGCACAGTTCAAGAGACTGTGCCTGCAGGATGGCCGCTTTTTGct  
cgagctggcgaattcc  
>CD\_NM\_198053.1:236  
CgCctGcgagtctGGtatGCCCTCTTCATCTATGGTGTCAATTTCAAGAGAATGACACCATAGATGAAGAGGATTTTTGct  
cgagctggcgaattcc  
>CD\_NM\_198053.1:160  
CgCctGcgagtctGGtatGAAGGCACAGTTGCCGATTACAGTTCAAGAGACTGTAATCGGCAACTGTGCCTGTTTTGct  
cgagctggcgaattcc  
>CD\_NM\_198053.1:261  
CgCctGcgagtctGGtatGAACTGCCTTGTTCTGAGAGTGTTCAGGACACTCTCAGGAACAAGGCAGTGTTTTTGct  
cgagctggcgaattcc  
>CD\_NM\_198053.1:225  
CgCctGcgagtctGGtatGACTGGATGGAATCCTCTTCATCTTCAAGAGAGATGAAGAGGATTCCATCCAGCTTTTTGct  
cgagctggcgaattcc  
>CD\_NM\_198053.1:453  
CgCctGcgagtctGGtatGATACAATGAACTGCAGAAAGATTTCAAGAGAATCTTCTGCAGTTCATTGTACTTTTTGct  
cgagctggcgaattcc  
>CD\_NM\_198053.1:216  
CgCctGcgagtctGGtatGATGCTACCTGCTGGATGGAATCTTCAAGAGAGATTCCATCCAGCAGGTAGCAGTTTTGct  
cgagctggcgaattcc  
>CD\_NM\_198053.1:548  
CgCctGcgagtctGGtatGCCAGGGTCTCAGTACAGCCACTTCAAGAGAGTGGCTGTACTGAGACCCCTGGTTTTTTGct  
cgagctggcgaattcc  
>CD\_NM\_198053.1:414

CgCtGcgagtctGGtatGAGGAAAGCCGCAGAGAAGGAAGTTCAAGAGACTTCCTTCTCTGCGGCTTCCCTTTTTGct  
cgagctggcgaattcc  
>CD\_NM\_198053.1:263  
CgCtGcgagtctGGtatGATGCCTTGTTCCTGAGAGTGAATTCAGAGATTCACCTCTCAGGAACAAGGCAGTTTTTgct  
cgagctggcgaattcc  
>CD\_NM\_198053.1:585  
CgCtGcgagtctGGtatGAGCCCTTCACATGCAGGCCCTGTTCAAGAGACAGGGCCTGCATGTGAAGGGCGTTTTTgct  
cgagctggcgaattcc  
>CD\_NM\_198053.1:238  
CgCtGcgagtctGGtatGATCTTCATCTATGGTGTTCATTCTTCAAGAGAGAATGACACCATAGATGAAGAGTTTTTgct  
cgagctggcgaattcc  
>CD\_NM\_198053.1:576  
CgCtGcgagtctGGtatGAACCTACGACGCCCTTCACATGTTCAAGAGACATGTGAAGGGCGTCGTAGGTGTTTTTgct  
cgagctggcgaattcc  
>CD\_NM\_198053.1:272  
CgCtGcgagtctGGtatGCCCTGAGAGTGAAGTTCAGCAGTTCAAGAGACTGCTGAACTTCACTCTCAGGATTTTTGct  
cgagctggcgaattcc  
>CD\_NM\_198053.1:175  
CgCtGcgagtctGGtatGCTTACAGAGGCACAGAGCTTTGTTCAAGAGACAAAGCTCTGTGCCTCTGTAATTTTTTgct  
cgagctggcgaattcc  
>CD\_NM\_198053.1:454  
CgCtGcgagtctGGtatGCACAATGAACTGCAGAAAGATATTCAAGAGATATCTTTCTGCAGTTCATTGTATTTTTGct  
cgagctggcgaattcc  
>CD\_NM\_198053.1:227  
CgCtGcgagtctGGtatGCGGATGGAATCCTCTTCATCTATTCAAGAGATAGATGAAGAGGATTCATCCATTTTTGct  
cgagctggcgaattcc  
>CD\_NM\_198053.1:544  
CgCtGcgagtctGGtatGATTTACCAGGGTCTCAGTACAGTTCAAGAGACTGTACTGAGACCCTGGTAAAGTTTTTgct  
cgagctggcgaattcc  
>CD\_NM\_198053.1:255  
CgCtGcgagtctGGtatGAATTCTCACTGCCCTTGTTCCTGTTCAAGAGACAGGAACAAGGCAGTGAGAATGTTTTTgct  
cgagctggcgaattcc  
>CD\_NM\_198053.1:234  
CgCtGcgagtctGGtatGCATCCTCTTCATCTATGGTGTCTTCAAGAGAGACACCATAGATGAAGAGGATTTTTTgct  
cgagctggcgaattcc  
>CD\_NM\_198053.1:561  
CgCtGcgagtctGGtatGCACAGCCACCAAGGACACCTACTTCAAGAGAGTAGGTGTCCTTGGTGGCTGTATTTTTGct  
cgagctggcgaattcc  
>CD\_NM\_198053.1:206  
CgCtGcgagtctGGtatGCTCCCAAACCTCTGCTACCTGCTTTCAAGAGAAGCAGGTAGCAGAGTTTGGGATTTTTTgct  
cgagctggcgaattcc  
>CD\_NM\_198053.1:251  
CgCtGcgagtctGGtatGATGTCATTCTCACTGCCTTGTTTTTCAAGAGAAACAAGGCAGTGAGAATGACACTTTTTGct  
cgagctggcgaattcc  
>CD\_NM\_020404:1225  
CgCtGcgagtctGGtatGAGCCTGACTTTGCCCTGGCCTATTCAAGAGATAGGCCAGGGCAAAGTCAGGCGTTTTTgct  
cgagctggcgaattcc  
>CD\_NM\_020404:1810  
CgCtGcgagtctGGtatGACCCTGTGTCTCCTGCCCATCATTCAAGAGATGATGGGCAGGAGACACAGGGTTTTTgct  
cgagctggcgaattcc  
>CD\_NM\_020404:564  
CgCtGcgagtctGGtatGCTCCACCTGGTCTCCACAGAGTTTCAAGAGAACTCTGTGGAGACCAGGTGGAATTTTTGct  
cgagctggcgaattcc  
>CD\_NM\_020404:1033

CgCctGcgagtctGGtatGCGGGACATGAGCTGGAGGCTGATTCAAGAGATCAGCCTCCAGCTCATGTCCCTTTTTTGct  
cgagctggcgaattcc  
>CD\_NM\_020404.2:1517  
CgCctGcgagtctGGtatGATCTCTGTCTCTCATTTCAGCACTTCAAGAGAGTGTGAATGAGAGACAGAGAGTTTTTGct  
cgagctggcgaattcc  
>CD\_NM\_020404.2:1008  
CgCctGcgagtctGGtatGATGGCTTCGAGTGTATTATTGTAGTTCAAGAGACTACAATAAACTCGAAGCCACTTTTTTGct  
cgagctggcgaattcc  
>CD\_NM\_020404.2:1108  
CgCctGcgagtctGGtatGAGGAGATGAGTTGCTGGATGACTTCAAGAGAGTCATCCAGCAACTCATCTCCGTTTTTGct  
cgagctggcgaattcc  
>CD\_NM\_020404.2:1033  
CgCctGcgagtctGGtatGAGGACATGAGCTGGAGGCTGATTTCAAGAGAATCAGCCTCCAGCTCATGTCCCTTTTTTGct  
cgagctggcgaattcc  
>CD\_NM\_020404.2:1225  
CgCctGcgagtctGGtatGACCTGACTTTGCCCTGGCCTATTTCAAGAGAATAGGCCAGGGCAAAGTCAGGCTTTTTTGct  
cgagctggcgaattcc  
>CD\_NM\_020404.2:1096  
CgCctGcgagtctGGtatGCTCCCAGGACCTCGGAGATGAGTTCAAGAGACTCATCTCCGAGGTCTGGGAATTTTTTGct  
cgagctggcgaattcc  
>CD\_NM\_020404.2:895  
CgCctGcgagtctGGtatGATGCCACTGTCGCCTGGGTTTCTTCAAGAGAGAAACCCAGGCGACAGTGGCAGTTTTTGct  
cgagctggcgaattcc  
>CD\_NM\_020404.2:969  
CgCctGcgagtctGGtatGCTGCCGGTGTGTGCCAGCAGATTTCAAGAGAATCTGCTGGCACACACCCGGCAATTTTTTGct  
cgagctggcgaattcc  
>CD\_NM\_020404.2:1267  
CgCctGcgagtctGGtatGAAGAGAGCCACAGATACCCTACTTCAAGAGAGTAGGGTATCTGTGGCTCTCTGTTTTTGct  
cgagctggcgaattcc  
>CD\_NM\_020404.2:505  
CgCctGcgagtctGGtatGATGCCCGCGCTGCAAGATGAGTTCAAGAGACTCATCTTGCAGCGCCGGGCAGTTTTTGct  
cgagctggcgaattcc  
>CD\_NM\_020404.2:2167  
CgCctGcgagtctGGtatGCCCCAACAAGCGCATCACTGACTTCAAGAGAGTCAGTGATGCGCTTGTGGGTTTTTTGct  
cgagctggcgaattcc  
>CD\_NM\_020404.2:1994  
CgCctGcgagtctGGtatGACCTCACCAGCTCCCACAGCAGTTCAAGAGACTGCTGTGGGAGCTGGTGAGGGTTTTTGct  
cgagctggcgaattcc  
>CD\_NM\_020404.2:979  
CgCctGcgagtctGGtatGATGCCAGCAGATGTGTGTCAACTTCAAGAGAGTTGACACACATCTGCTGGCACTTTTTTGct  
cgagctggcgaattcc  
>CD\_NM\_020404.2:564  
CgCctGcgagtctGGtatGCCACCTGGTCTCCACAGAGTTTTCAAGAGAACTCTGTGGAGACCAGGTGGATTTTTTGct  
cgagctggcgaattcc  
>CD\_NM\_020404.2:1691  
CgCctGcgagtctGGtatGCCACCCTCGGTGCCAGCTACTTCAAGAGAGTAGCTGGGCACCGAGGGTGGTTTTTTGct  
cgagctggcgaattcc  
>CD\_NM\_020404.2:637  
CgCctGcgagtctGGtatGAGGAGCCTCTCTGCTCTGCGTGTTCAGAGACACGCAGAGCAGAGAGGCTCCCTTTTTTGct  
cgagctggcgaattcc  
>CD\_NM\_020404.2:754  
CgCctGcgagtctGGtatGCGTGGAGGAGGTGGATGGTCACTTCAAGAGAGTGACCATCCACCTCCTCCACATTTTTTGct  
cgagctggcgaattcc  
>CD\_NM\_020404.2:639



CgCctGcgagtctGGtatGAAGCCTCTCTGCTCTGCGTGAATTCAAGAGATTCACGCAGAGCAGAGAGGCTCTTTTTGct  
cgagctggcgaattcc  
>CD\_NM\_020404.2:1373  
CgCctGcgagtctGGtatGATCTCTGCCACGCATCCCACACTTCAAGAGAGTGTGGGATGCGTGGCAGAGACTTTTTGct  
cgagctggcgaattcc  
>CD\_NM\_020404.2:1729  
CgCctGcgagtctGGtatGCGCCCTTGTCCTCAGAACCCAGTTCAAGAGACTGGGTTCTGAGGACAAGGGCATTTTTTGct  
cgagctggcgaattcc  
>CD\_NM\_020404.2:1248  
CgCctGcgagtctGGtatGAACCGAGCTTCCCAGAGGACAGTTCAAGAGACTGTCTCTGGGAAGCTCGGTCTTTTTGct  
cgagctggcgaattcc  
>CD\_NM\_020404.2:214  
CgCctGcgagtctGGtatGAGCCCAGCGTGTGGACAGCCTGTTCAAGAGACAGGCTGTCCACACGCTGGGCCTTTTTGct  
cgagctggcgaattcc  
>CD\_NM\_020404.2:1645  
CgCctGcgagtctGGtatGAACCACTCATTTGCCTGGAATCTTCAAGAGAGATTCCAGGCAAATGAGTGGTGTTTTTGct  
cgagctggcgaattcc  
>CD\_NM\_020404.2:113  
CgCctGcgagtctGGtatGCGCTGCTACGCTCTCTTCCCACACTTCAAGAGAGTGGGAAGAGAGCGTAGCAGCTTTTTGct  
cgagctggcgaattcc  
>CD\_NM\_020404.2:2127  
CgCctGcgagtctGGtatGAACTGGGCATCGTGTACTGCACTTCAAGAGAGTGCAGTACACGATGCCAGTGTTTTTGct  
cgagctggcgaattcc  
>CD\_NM\_020404.2:1812  
CgCctGcgagtctGGtatGATGTGTCTCCTGCCCATCAAATTTCAAGAGAATTTGATGGGCAGGAGACACAGTTTTGct  
cgagctggcgaattcc  
>CD\_NM\_020404.2:1246  
CgCctGcgagtctGGtatGCAGACCGAGCTTCCCAGAGGACTTCAAGAGAGTCTCTGGGAAGCTCGGTCTATTTTTGct  
cgagctggcgaattcc  
>CD\_NM\_020404.2:1003  
CgCctGcgagtctGGtatGAGTTGGTGGCTTCGAGTGTATTATTTCAAGAGAATAACACTCGAAGCCACCAACGTTTTGct  
cgagctggcgaattcc  
>CD\_NM\_020404.2:1338  
CgCctGcgagtctGGtatGCCTCCTCAGTGCTCTCCGTCACTTCAAGAGAGTGACGGAGAGCACTGAGGAGTTTTGct  
cgagctggcgaattcc  
>CD\_NM\_001977:716  
CgCctGcgagtctGGtatGCCCCGAGGTGTTTCGAGTACAATTTCAAGAGATTGTACTCGAAACACCTCCGGATTTTTGct  
cgagctggcgaattcc  
>CD\_NM\_001977:964  
CgCctGcgagtctGGtatGCAGGCAACTTATACAATATCTATTCAAGAGATAGATATTGTATAAGTTGCCTTTTTTGct  
cgagctggcgaattcc  
>CD\_NM\_001977:1200  
CgCctGcgagtctGGtatGCGCCGAATATGCTGCAAACATATTCAAGAGATATGTTTGCAGCATATTCGGCTTTTTGct  
cgagctggcgaattcc  
>CD\_NM\_001977:1827  
CgCctGcgagtctGGtatGCAGGCTACCAGTGAAAGAAGTATTCAAGAGATACTTCTTTCACTGGTAGCTATTTTTGct  
cgagctggcgaattcc  
>CD\_NM\_001977:2270  
CgCctGcgagtctGGtatGCGGCTTTGAACTTGACCAAGTATTCAAGAGATACTTGGTCAAGTTCAAAGCCATTTTTGct  
cgagctggcgaattcc  
>CD\_NM\_001977:2643  
CgCctGcgagtctGGtatGCTGGAACACTCTTGTAGCAATTTCAAGAGATTGCTCAAGAGTGTAGTTCCATTTTTGct  
cgagctggcgaattcc  
>CD\_NM\_001977.2:2015

CgCctGcgagtctGGtatGCACAAGCAGTGTGTTATTTAATTTCAAGAGAATTAAATAACACACTGCTTGTTTTTTTgct  
cgagctggcgaattcc  
>CD\_NM\_001977.2:2426  
CgCctGcgagtctGGtatGCGCAGATTCTCTGGGATGGAATTTCAAGAGAATTCATCCCAGAGAATCTGCATTTTTTgct  
cgagctggcgaattcc  
>CD\_NM\_001977.2:1260  
CgCctGcgagtctGGtatGCTGAATTATCTCTTTCCTAAATTTCAAGAGAATTTAGGAAGAGAATAATTCATTTTTTgct  
cgagctggcgaattcc  
>CD\_NM\_001977.2:2243  
CgCctGcgagtctGGtatGCAGAGCTCAACTTCTAGATTATTTCAAGAGAATAATCTAGAAGTTGAGCTCTTTTTTTgct  
cgagctggcgaattcc  
>CD\_NM\_001977.2:794  
CgCctGcgagtctGGtatGCGGCCTGTATCTCCTGACCATGTTCAAGAGACATGGTCAGGAGATACAGGCCATTTTTTgct  
cgagctggcgaattcc  
>CD\_NM\_001977.2:2783  
CgCctGcgagtctGGtatGCACTCAGGATGTGTTTACAGTCTTCAAGAGAGACTGTAAACACATCCTGAGTTTTTTTgct  
cgagctggcgaattcc  
>CD\_NM\_001977.2:1166  
CgCctGcgagtctGGtatGCACAATTTATGTCCAGCCAGAGTTCAAGAGACTCTGGCTGGACATAAATTGTATTTTTTgct  
cgagctggcgaattcc  
>CD\_NM\_001977.2:1553  
CgCctGcgagtctGGtatGACGTGACCAAATGTTACTTGAATTTCAAGAGATTTCAAGTAACATTTGGTCACGCTTTTTTgct  
cgagctggcgaattcc  
>CD\_NM\_001977.2:1200  
CgCctGcgagtctGGtatGACCGAATATGCTGCAAACATAATTTCAAGAGATTATGTTTGCAGCATATTCGGCTTTTTTgct  
cgagctggcgaattcc  
>CD\_NM\_001977.2:1508  
CgCctGcgagtctGGtatGATTTGAGTTTCTGGGAGTAAACTTTCAAGAGAGTTTACTCCCAGAAACTCAAAGTTTTTTgct  
cgagctggcgaattcc  
>CD\_NM\_001977.2:1976  
CgCctGcgagtctGGtatGCACATGGAATATCCCAGTTAAATTTCAAGAGATTTAACTGGGATATTCATGTATTTTTTgct  
cgagctggcgaattcc  
>CD\_NM\_001977.2:2453  
CgCctGcgagtctGGtatGCGGAGACCATGTCACAAAGTTATTTCAAGAGATAACTTTTGTGACATGGTCTCCATTTTTTgct  
cgagctggcgaattcc  
>CD\_NM\_001977.2:2806  
CgCctGcgagtctGGtatGCTCGATATATCTCATATAACAGTTCAAGAGACTGTTATATGAGATATATCGAATTTTTTgct  
cgagctggcgaattcc  
>CD\_NM\_001977.2:2792  
CgCctGcgagtctGGtatGCGTGTTTACAGTCATTCGATATTTCAAGAGAATATCGAATGACTGTAAACACATTTTTTgct  
cgagctggcgaattcc  
>CD\_NM\_001977.2:1666  
CgCctGcgagtctGGtatGCTGATGGAATATCCTATAGCAATTTCAAGAGATTGCTATAGGATATTCATCAATTTTTTgct  
cgagctggcgaattcc  
>CD\_NM\_001977.2:2124  
CgCctGcgagtctGGtatGCATCGTGTAATTTATGAAGTAGTTCAAGAGACTACTTCATAATTTACACGATATTTTTTgct  
cgagctggcgaattcc  
>CD\_NM\_001977.2:2017  
CgCctGcgagtctGGtatGAAAGCAGTGTGTTATTTAATAGTTCAAGAGACTATTAATAACACACTGCTTGTTTTTTgct  
cgagctggcgaattcc  
>CD\_NM\_001977.2:2643  
CgCctGcgagtctGGtatGCGGAACTACACTCTTGAGCAATTTCAAGAGAATTGCTCAAGAGTGTAGTTCCATTTTTTgct  
cgagctggcgaattcc  
>CD\_NM\_001977.2:1418

CgCctGcgagtctGGtatGCGCCCATGAACTTGTGCATCAGTTCAAGAGACTGATGCACAAGTTCATGGGCATTTTTTGct  
cgagctggcgaattcc  
>CD\_NM\_001977.2:2322  
CgCctGcgagtctGGtatGAAGAGAGTAATTTTCAGCTGTAATTTCAAGAGATTACAGCTGAAATTACTCTCTGTTTTTGct  
cgagctggcgaattcc  
>CD\_NM\_001977.2:1333  
CgCctGcgagtctGGtatGAACTCATCACGTACAGAGAACTTTCAAGAGAGTTTCTCTGTACGTGATGAGTCTTTTTTGct  
cgagctggcgaattcc  
>CD\_NM\_001977.2:2207  
CgCctGcgagtctGGtatGCCGTGCAAGTCTTATTGATGATTTCAAGAGAATCATCAATAAGACTTGCACGATTTTTTGct  
cgagctggcgaattcc  
>CD\_NM\_001977.2:1998  
CgCctGcgagtctGGtatGCGGACTGAAGATAATATAACAATTTCAAGAGATTGTTATATTATCTTCAGTCCATTTTTTGct  
cgagctggcgaattcc  
>CD\_NM\_001977.2:2930  
CgCctGcgagtctGGtatGCGCAGAGCCATTC AACACTGAATTTCAAGAGATTCAGTGTGAATGGCTCTGCTTTTTTGct  
cgagctggcgaattcc  
>CD\_NM\_001977.2:2632  
CgCctGcgagtctGGtatGCTGAGATTTTCATGGAACTACACTTTCAAGAGAGTGTAGTTCCATGAAATCTCATTTTTTGct  
cgagctggcgaattcc  
>CD\_NM\_001977.2:1104  
CgCctGcgagtctGGtatGATGTGCTTTGCTGTACATCAATTTCAAGAGAATTGATGTACAGCAAAGCACACTTTTTTGct  
cgagctggcgaattcc  
>CD\_NM\_001977.2:256  
CgCctGcgagtctGGtatGAGGAGAGAGAGGGCTCTAAGAGTTCAAGAGACTCTTAGAGCCCTCTCTCCGTTTTTGct  
cgagctggcgaattcc  
>CD\_NM\_003326.2:259  
CgCctGcgagtctGGtatGAGGCTGCTCCTGTGCTTACCTTTCAAGAGAAGGTGAAGCACAGGAGCAGCCCTTTTTTGct  
cgagctggcgaattcc  
>CD\_NM\_003326.2:578  
CgCctGcgagtctGGtatGATCTCTGACTTACAAAGACAAATTTCAAGAGATTTGTCTTTGTAAGTCAGAGAGTTTTTGct  
cgagctggcgaattcc  
>CD\_NM\_003326.2:428  
CgCctGcgagtctGGtatGATCAGTCATCATCAACTGTGATTTCAAGAGAATCACAGTTGATGATGACTGAGTTTTTGct  
cgagctggcgaattcc  
>CD\_NM\_003326.2:407  
CgCctGcgagtctGGtatGCATCATGAAGGTGCAGAACAATTTCAAGAGAGTTGTTCTGCACCTTCATGATTTTTTGct  
cgagctggcgaattcc  
>CD\_NM\_003326.2:329  
CgCctGcgagtctGGtatGCATTTCAAAGTATCAAAGTACAATTTCAAGAGATTGTACTTTGATACTTTGAATTTTTTGct  
cgagctggcgaattcc  
>CD\_NM\_003326.2:584  
CgCctGcgagtctGGtatGAACTTACAAAGACAAAGTCTACTTTCAAGAGAGTAGACTTTGTCTTTGTAAGTCTTTTTTGct  
cgagctggcgaattcc  
>CD\_NM\_003326.2:632  
CgCctGcgagtctGGtatGACTGGATGACTTCCATGTGAATTTCAAGAGAATTCACATGGAAGTCATCCAGTTTTTGct  
cgagctggcgaattcc  
>CD\_NM\_003326.2:572  
CgCctGcgagtctGGtatGAGTGGCCTCTCTGACTTACAAATTTCAAGAGATTTGTAAGTCAGAGAGGCCACTTTTTGct  
cgagctggcgaattcc  
>CD\_NM\_003326.2:590  
CgCctGcgagtctGGtatGAAAAGACAAAGTCTACTTTGAATTTCAAGAGAATTCAGTAGACTTTGTCTTTGTTTTTGct  
cgagctggcgaattcc  
>CD\_NM\_003326.2:226

CgCctGcgagtctGGtatGCATTGCTGGTGGCCCTCTGTAATTTCAAGAGAATTACAGAGGCCACCAGCAATATTTTTGct  
cgagctggcgaattcc  
>CD\_NM\_003326.2:653  
CgCctGcgagtctGGtatGCGGCGGAGAACTGATTCTTATCTTCAAGAGAGATAAGAATCAGTTCTCCGCCATTTTTGct  
cgagctggcgaattcc  
>CD\_NM\_003326.2:418  
CgCctGcgagtctGGtatGCGCAGAACAACCTCAGTCATCATTTCAAGAGAATGATGACTGAGTTGTTCTGCATTTTTGct  
cgagctggcgaattcc  
>CD\_NM\_003326.2:259  
CgCctGcgagtctGGtatGAGCTGCTCCTGTGCTTCACCTATTCAAGAGATAGGTGAAGCACAGGAGCAGCCTTTTTGct  
cgagctggcgaattcc  
>CD\_NM\_003326.2:565  
CgCctGcgagtctGGtatGACTTGATGGTGGCCCTCTCTGACTTCAAGAGAGTCAGAGAGGCCACCATCAAGGTTTTGct  
cgagctggcgaattcc  
>CD\_NM\_003326.2:503  
CgCctGcgagtctGGtatGACTTCATTACCAGAAGGATGAGTTCAAGAGACTCATCCTTCTGGTAATGAAGGTTTTGct  
cgagctggcgaattcc  
>CD\_NM\_003326.2:491  
CgCctGcgagtctGGtatGCGTCAACATTAGCCTTCATTACTTCAAGAGAGTAATGAAGGCTAATGTTGACTTTTTGct  
cgagctggcgaattcc  
>CD\_NM\_003326.2:353  
CgCctGcgagtctGGtatGCACCGAATATAAGAAGGAGAAATTTCAAGAGATTTCTCCTTCTTATATTCGGTATTTTTGct  
cgagctggcgaattcc  
>CD\_NM\_003326.2:659  
CgCctGcgagtctGGtatGCGAACTGATTCTTATCCATCAATTTCAAGAGATTGATGGATAAGAATCAGTTCTTTTTGct  
cgagctggcgaattcc  
>CD\_NM\_003326.2:291  
CgCctGcgagtctGGtatGAACTTCTCTGCTCTCAGGTATTTCAAGAGAATACCTGAAGAGCAGAGAAGTGTTTTTGct  
cgagctggcgaattcc  
>CD\_NM\_003326.2:458  
CgCctGcgagtctGGtatGCCTCATCTCCCTGAAGGGCTACTTCAAGAGAGTAGCCCTCAGGGAGATGAGATTTTTGct  
cgagctggcgaattcc  
>CD\_NM\_003326.2:422  
CgCctGcgagtctGGtatGAAACAACCTCAGTCATCATCAACTTCAAGAGAGTTGATGATGACTGAGTTGTTCTTTTTGct  
cgagctggcgaattcc  
>CD\_NM\_003326.2:296  
CgCctGcgagtctGGtatGATCTGCTCTTCAGGTATCACATTTCAAGAGAATGTGATACCTGAAGAGCAGAGTTTTGct  
cgagctggcgaattcc  
>CD\_NM\_003326.2:346  
CgCctGcgagtctGGtatGCACAATTTACCGAATATAAGAATTTCAAGAGATTCTTATATTCGGTAAATGTATTTTTGct  
cgagctggcgaattcc  
>CD\_NM\_003326.2:265  
CgCctGcgagtctGGtatGCCCTGTGCTTCACCTACATCTGTTCAAGAGACAGATGTAGGTGAAGCACAGGATTTTTGct  
cgagctggcgaattcc  
>CD\_NM\_003326.2:500  
CgCctGcgagtctGGtatGCAGCCTTCATTACCAGAAGGATTTCAAGAGAATCCTTCTGGTAATGAAGGCTATTTTTGct  
cgagctggcgaattcc  
>CD\_NM\_003326.2:629  
CgCctGcgagtctGGtatGATCCCTGGATGACTTCCATGTGTTCAAGAGACACATGGAAGTCATCCAGGGAGTTTTGct  
cgagctggcgaattcc  
>CD\_NM\_003326.2:294  
CgCctGcgagtctGGtatGCTCTCTGCTCTTCAGGTATCACTTCAAGAGAGTGATACCTGAAGAGCAGAGAATTTTTGct  
cgagctggcgaattcc  
>CD\_NM\_003326.2:196

CgCctGcgagtctGGtatGAAGCCAGGCCAAGATTCGAGAGTTCAAGAGACTCTCGAATCTTGGCCTGGCTGTTTTTGct  
cgagctggcgaattcc  
>CD\_NM\_003326.2:339  
CgCctGcgagtctGGtatGCTCAAAGTACAATTTACCGAATTTCAAGAGAATTCGGTAAATTGTACTTTGATTTTTTGct  
cgagctggcgaattcc  
>CD\_NM\_003326.2:602  
CgCctGcgagtctGGtatGATACTTGAATGTGACCACTGACTTCAAGAGAGTCAGTGGTCACATTCAAGTAGTTTTTGct  
cgagctggcgaattcc  
>CD\_NM\_003326.2:642  
CgCctGcgagtctGGtatGCTCCATGTGAATGGCGGAGAACTTCAAGAGAGTTCTCCGCCATTCACATGGAATTTTTTGct  
cgagctggcgaattcc  
>CD\_NM\_003326.2:633  
CgCctGcgagtctGGtatGATGGATGACTTCCATGTGAATGTTCAAGAGACATTCACATGGAAGTCATCCAGTTTTTGct  
cgagctggcgaattcc  
>CD\_NM\_003326.2:617  
CgCctGcgagtctGGtatGAACTGACAATACCTCCCTGGATTTCAAGAGAATCCAGGGAGGTATTGTCAGTTTTTTGct  
cgagctggcgaattcc  
>CD\_NM\_003810:249  
CgCctGcgagtctGGtatGCGTGGCATTGCTTGTTCCTTAATTCAAGAGATTAAGAAACAAGCAATGCCACTTTTTTGct  
cgagctggcgaattcc  
>CD\_NM\_003810:710  
CgCctGcgagtctGGtatGCATGGTCCAATATATTTACAAATTC AAGAGATTTGTAAATATATTGGACCATTTTTTGct  
cgagctggcgaattcc  
>CD\_NM\_003810:571  
CgCctGcgagtctGGtatGATGGGCATTCATTCCTGAGCAATTC AAGAGATTGCTCAGGAATGAATGCCACTTTTTTGct  
cgagctggcgaattcc  
>CD\_NM\_003810:734  
CgCctGcgagtctGGtatGAACAAGTTATCCTGACCCTATATTCAAGAGATATAGGGTCAGGATAACTTGTGTTTTTGct  
cgagctggcgaattcc  
>CD\_NM\_003810:805  
CgCctGcgagtctGGtatGCTGGACTCTATTCATCTATCATTCAAGAGATGATAGATGGAATAGAGTCCATTTTTTGct  
cgagctggcgaattcc  
>CD\_NM\_003810.2:249  
CgCctGcgagtctGGtatGATGGCATTGCTTGTTCCTTAATTCAAGAGATTTAAGAAACAAGCAATGCCACTTTTTTGct  
cgagctggcgaattcc  
>CD\_NM\_003810.2:571  
CgCctGcgagtctGGtatGCGGGCATTTCATTCCTGAGCAACTTCAAGAGAGTTGCTCAGGAATGAATGCCACTTTTTTGct  
cgagctggcgaattcc  
>CD\_NM\_003810.2:452  
CgCctGcgagtctGGtatGAAGAGAGTAGCAGCTCACATAATTC AAGAGATTATGTGAGCTGCTACTCTCTGTTTTTGct  
cgagctggcgaattcc  
>CD\_NM\_003810.2:343  
CgCctGcgagtctGGtatGCCTCCGTCAGCTCGTTAGAAAGTTCAAGAGACTTCTAACGAGCTGACGGAGTTTTTGct  
cgagctggcgaattcc  
>CD\_NM\_003810.2:744  
CgCctGcgagtctGGtatGATGACCCTATATTGTTGATGAATTC AAGAGATTCATCAACAATATAGGGTCAGTTTTTGct  
cgagctggcgaattcc  
>CD\_NM\_003810.2:173  
CgCctGcgagtctGGtatGAAGTCTCTCTGTGTGGCTGTAATTC AAGAGATTACAGCCACACAGAGAGACTGTTTTTGct  
cgagctggcgaattcc  
>CD\_NM\_003810.2:805  
CgCctGcgagtctGGtatGCGGACTCTATTCATCTATCAATTC AAGAGATTGATAGATGGAATAGAGTCCATTTTTTGct  
cgagctggcgaattcc  
>CD\_NM\_003810.2:659

CgCtGcgagtctGGtatGCACTTTCGATTCAGGAGGAAATTC AAGAGATTCCTCCTGAAATCGAAAGTATTTTTGct  
cgagctggcgaattcc  
>CD\_NM\_003810.2:794  
CgCtGcgagtctGGtatGAATGCAGAATATGGACTCTATTTTCAAGAGAAATAGAGTCCATATTCTGCATCTTTTTGct  
cgagctggcgaattcc  
>CD\_NM\_003810.2:492  
CgCtGcgagtctGGtatGACAACACATTGTCTTCTCCAAATTC AAGAGATTTGGAGAAGACAATGTGTTGCTTTTTGct  
cgagctggcgaattcc  
>CD\_NM\_003810.2:582  
CgCtGcgagtctGGtatGCCCTGAGCAACTTGCACTTGAGTTCAAGAGACTCAAGTGCAAGTTGCTCAGGATTTTTGct  
cgagctggcgaattcc  
>CD\_NM\_003810.2:785  
CgCtGcgagtctGGtatGCGGTCTAAAGATGCAGAATATGTTCAAGAGACATATTCTGCATCTTTAGACCATTTTTGct  
cgagctggcgaattcc  
>CD\_NM\_003810.2:710  
CgCtGcgagtctGGtatGCTGGTCCAATATATTTACAAATTTCAAGAGAATTTGTAAATATATTGGACCATTTTTGct  
cgagctggcgaattcc  
>CD\_NM\_003810.2:691  
CgCtGcgagtctGGtatGAACAAAGAACGACAAACAAATGTTCAAGAGACATTTGTTTGTCTTTGTGTTTTGct  
cgagctggcgaattcc  
>CD\_NM\_003810.2:348  
CgCtGcgagtctGGtatGATCAGCTCGTTAGAAAGATGATTTCAAGAGAATCATCTTTCTAACGAGCTGACTTTTTGct  
cgagctggcgaattcc  
>CD\_NM\_003810.2:607  
CgCtGcgagtctGGtatGCGGTGAACTGGTCATCCATGAATTC AAGAGATTCATGGATGACCAGTTCACCATTTTTGct  
cgagctggcgaattcc  
>CD\_NM\_003810.2:208  
CgCtGcgagtctGGtatGCACCAACGAGCTGAAGCAGATGTTCAAGAGACATCTGCTTCAGCTCGTTGGTATTTTTGct  
cgagctggcgaattcc  
>CD\_NM\_003810.2:549  
CgCtGcgagtctGGtatGCCTCCTGGGAATCATCAAGGAGTTCAAGAGACTCCTTGATGATTCCCAGGAGTTTTGct  
cgagctggcgaattcc  
>CD\_NM\_003810.2:874  
CgCtGcgagtctGGtatGCACAAATGAGCACTTGATAGACTTCAAGAGAGTCTATCAAGTGCTCATTTGTTTTTTGct  
cgagctggcgaattcc  
>CD\_NM\_003810.2:189  
CgCtGcgagtctGGtatGATGTAACCTACGTGTACTTTACTTCAAGAGAGTAAAGTACACGTAAGTTACAGTTTTGct  
cgagctggcgaattcc  
>CD\_NM\_003810.2:450  
CgCtGcgagtctGGtatGATCAGAGAGTAGCAGCTCACATTTCAAGAGAATGTGAGCTGCTACTCTCTGAGTTTTGct  
cgagctggcgaattcc  
>CD\_NM\_003810.2:494  
CgCtGcgagtctGGtatGCACACATTGTCTTCTCCAAACTTTCAAGAGAAGTTTGGAGAAGACAATGTGTTTTTTGct  
cgagctggcgaattcc  
>CD\_NM\_003810.2:734  
CgCtGcgagtctGGtatGCCAAGTTATCCTGACCCTATATTTCAAGAGAATATAGGGTCAGGATAACTTGTTTTTTGct  
cgagctggcgaattcc  
>CD\_NM\_003810.2:636  
CgCtGcgagtctGGtatGCTTACTACATCTATTCCCAAACCTTCAAGAGAGTTTGGGAATAGATGTAGTAAATTTTTGct  
cgagctggcgaattcc  
>CD\_NM\_003810.2:154  
CgCtGcgagtctGGtatGAATCTTCACAGTGCTCCTGCAGTTCAAGAGACTGCAGGAGCACTGTGAAGATTTTTGct  
cgagctggcgaattcc  
>CD\_NM\_003810.2:177

CgCctGcgagtctGGtatGATCTCTGTGTGGCTGTAACCTATTCAAGAGATAAGTTACAGCCACACAGAGAGTTTTTGct  
cgagctggcgaattcc  
>CD\_NM\_003810.2:141  
CgCctGcgagtctGGtatGACGTGCTGATCGTGATCTTCACTTCAAGAGAGTGAAGATCACGATCAGCACGTTTTTGct  
cgagctggcgaattcc  
>CD\_NM\_003810.2:562  
CgCctGcgagtctGGtatGCTCAAGGAGTGGGCATTCATTCTTCAAGAGAGAATGAATGCCACTCCTTGATTTTTTGct  
cgagctggcgaattcc  
>CD\_NM\_003701:1055  
CgCctGcgagtctGGtatGCTCCGGATCAGGATGCAACATATTCAAGAGATATGTTGCATCCTGATCCGGATTTTTTGct  
cgagctggcgaattcc  
>CD\_NM\_003701:675  
CgCctGcgagtctGGtatGAGACATCCCATCTGGTCCCATTTCAGAGAAATGGGAACCAGATGGGATGTCGTTTTTGct  
cgagctggcgaattcc  
>CD\_NM\_003701:519  
CgCctGcgagtctGGtatGAGCCTTTCAGGAGCTGTGCAATTCAAGAGATTGCACAGCTCCTTGAAAGGCCTTTTTGct  
cgagctggcgaattcc  
>CD\_NM\_003701.2:851  
CgCctGcgagtctGGtatGCACAGAGTATCTTCAACTAATGTTCAAGAGACATTAGTTGAAGATACTCTGTATTTTTGct  
cgagctggcgaattcc  
>CD\_NM\_003701.2:400  
CgCctGcgagtctGGtatGCTGGCACTCACTGCATTTATAGTTCAAGAGACTATAAATGCAGTGAGTGCCATTTTTTGct  
cgagctggcgaattcc  
>CD\_NM\_003701.2:849  
CgCctGcgagtctGGtatGACTACAGAGTATCTTCAACTAATTCAAGAGATTAGTTGAAGATACTCTGTAGCTTTTTTGct  
cgagctggcgaattcc  
>CD\_NM\_003701.2:733  
CgCctGcgagtctGGtatGAGGCCAAGATCTCCAACATGACTTCAAGAGAGTCATGTTGGAGATCTTGCCCTTTTTTGct  
cgagctggcgaattcc  
>CD\_NM\_003701.2:578  
CgCctGcgagtctGGtatGCGCAGAGAAAGCGATGGTGGATTTCAAGAGAAATCCACCATCGCTTCTCTGCTTTTTTGct  
cgagctggcgaattcc  
>CD\_NM\_003701.2:346  
CgCctGcgagtctGGtatGCCGCCCTGTTCTTCTATTTTCAGTTCAAGAGACTGAAATAGAAGAACAGGGCGATTTTTTGct  
cgagctggcgaattcc  
>CD\_NM\_003701.2:697  
CgCctGcgagtctGGtatGCAGTGAGTCTGTCTCTTGGTATTCAAGAGATACCAAGAGGACAGACTCACTTTTTTGct  
cgagctggcgaattcc  
>CD\_NM\_003701.2:999  
CgCctGcgagtctGGtatGCAGTTACGGTCTGGAGAGGAAATTCAAGAGATTTCTCTCCAGACCGTAACTTTTTTGct  
cgagctggcgaattcc  
>CD\_NM\_003701.2:341  
CgCctGcgagtctGGtatGAAGCGTCGCCCTGTTCTTCTATTTCAAGAGAAATAGAAGAACAGGGCGACGCTTTTTTGct  
cgagctggcgaattcc  
>CD\_NM\_003701.2:563  
CgCctGcgagtctGGtatGCTCACAGCACATCAGAGCAGAGTTCAAGAGACTCTGCTCTGATGTGCTGTGATTTTTTGct  
cgagctggcgaattcc  
>CD\_NM\_003701.2:343  
CgCctGcgagtctGGtatGACGTGCGCCCTGTTCTTCTATTTTTCAAGAGAAAATAGAAGAACAGGGCGACGTTTTTGct  
cgagctggcgaattcc  
>CD\_NM\_003701.2:819  
CgCctGcgagtctGGtatGCTTCGACATCATGAAACTTCAGTTCAAGAGACTGAAGTTTCATGATGTCGAAATTTTTTGct  
cgagctggcgaattcc  
>CD\_NM\_003701.2:675

CgCctGcgagtctGGtatGAACATCCCATCTGGTCCCATATTCAAGAGATATGGGAACCAGATGGGATGTCTTTTTGct  
cgagctggcgaattcc  
>CD\_NM\_003701.2:404  
CgCctGcgagtctGGtatGAACTCACTGCATTTATAGAATTTTCAAGAGAAATTCATAAATGCAGTGAGTGTTTTTGct  
cgagctggcgaattcc  
>CD\_NM\_003701.2:678  
CgCctGcgagtctGGtatGCTCCCATCTGGTCCCATAAAGTTCAAGAGACTTTATGGGAACCAGATGGGATTTTTTGct  
cgagctggcgaattcc  
>CD\_NM\_003701.2:862  
CgCctGcgagtctGGtatGCTCAACTAATGGTGTACGTCACTTCAAGAGAGTGACGTACACCATTAGTTGAATTTTTGct  
cgagctggcgaattcc  
>CD\_NM\_003701.2:402  
CgCctGcgagtctGGtatGAGCACTCACTGCATTTATAGAATTCAGAGATTCATAAATGCAGTGAGTGCCTTTTTGct  
cgagctggcgaattcc  
>CD\_NM\_003701.2:519  
CgCctGcgagtctGGtatGACCTTTCAGGAGCTGTGCAAATTCAGAGATTTGCACAGCTCCTTGAAAGCCTTTTTGct  
cgagctggcgaattcc  
>CD\_NM\_003701.2:187  
CgCctGcgagtctGGtatGCCCTGCGTGGCTCGGAGGAGATTTCAAGAGAATCTCCTCCGAGCCACGCAGGTTTTTGct  
cgagctggcgaattcc  
>CD\_NM\_003701.2:1010  
CgCctGcgagtctGGtatGCGGAGAGGAAATCAGCATCGAGTTCAAGAGACTCGATGCTGATTTCTCTCCATTTTTGct  
cgagctggcgaattcc  
>CD\_NM\_003701.2:905  
CgCctGcgagtctGGtatGCAGTTCTCATACCCTGATGAAATTCAGAGATTTTCATCAGGGTATGAGAACTTTTTTGct  
cgagctggcgaattcc  
>CD\_NM\_003701.2:935  
CgCctGcgagtctGGtatGAACCAAGTATGGTTCAGGGAATTTCAAGAGAATTCCTGACCAATACTTGGTGTTTTTGct  
cgagctggcgaattcc  
>CD\_NM\_003701.2:816  
CgCctGcgagtctGGtatGCGCTTTCGACATCATGAACTTTTCAAGAGAAAGTTTCATGATGTCGAAAGCATTTTTGct  
cgagctggcgaattcc  
>CD\_NM\_003701.2:773  
CgCctGcgagtctGGtatGCATAGTTAATCAGGATGGCTTTTTCAAGAGAAAAGCCATCCTGATTAATACTTTTTTGct  
cgagctggcgaattcc  
>CD\_NM\_003701.2:462  
CgCctGcgagtctGGtatGCCTCTGGAGAGTCAAGATACAATTCAGAGATTTGTATCTTGACTCTCCAGAGTTTTTGct  
cgagctggcgaattcc  
>CD\_NM\_003701.2:810  
CgCctGcgagtctGGtatGCACATTTGCTTTCGACATCATGTTCAAGAGACATGATGTCGAAAGCAAATGTTTTTGct  
cgagctggcgaattcc  
>CD\_NM\_003701.2:806  
CgCctGcgagtctGGtatGCGCCAACATTTGCTTTCGACATTTCAAGAGAATGTCGAAAGCAAATGTTGGCATTTTTGct  
cgagctggcgaattcc  
>CD\_NM\_003701.2:813  
CgCctGcgagtctGGtatGCTTTGCTTTCGACATCATGAAATTCAGAGATTTTCATGATGTCGAAAGCAAATTTTTGct  
cgagctggcgaattcc  
>CD\_NM\_003701.2:353  
CgCctGcgagtctGGtatGATTCTTCTATTTTCAGAGCGCAGTTCAAGAGACTGCGCTCTGAAATAGAAGAACTTTTTGct  
cgagctggcgaattcc  
>CD\_NM\_003701.2:906  
CgCctGcgagtctGGtatGCGTTCTCATACCCTGATGAAAGTTCAAGAGACTTTCATCAGGGTATGAGAACTTTTTTGct  
cgagctggcgaattcc  
>CD\_NM\_003808:1405



CgCctGcgagtctGGtatGAGGGATATTCTGAGTGTGTCATAATTCAAGAGATTATGACACTCAGAATATCCCCTTTTTGct  
cgagctggcgaattcc  
>CD\_NM\_003808:1429  
CgCctGcgagtctGGtatGACCCGGGCAAGGGCGAAACTTATTCAAGAGATAAGTTTCGCCCTTGCCCGGGTTTTTGct  
cgagctggcgaattcc  
>CD\_NM\_003808:1309  
CgCctGcgagtctGGtatGAAGGAGACTCTATTCCGATGTATTCAAGAGATACATCGGAATAGAGTCTCCTGTTTTTGct  
cgagctggcgaattcc  
>CD\_NM\_003808.2:1311  
CgCctGcgagtctGGtatGAAGACTCTATTCCGATGTATAATTCAAGAGATTATACATCGGAATAGAGTCTCTTTTTTGct  
cgagctggcgaattcc  
>CD\_NM\_003808.2:1238  
CgCctGcgagtctGGtatGCAGCCAGGTCTGTTTCAAGACTTCAAGAGAGTCTTGAAACAGGACCTGGCTATTTTTGct  
cgagctggcgaattcc  
>CD\_NM\_003808.2:1220  
CgCctGcgagtctGGtatGCGGAGTTTATCTGCTGTATAGCTTCAAGAGAGCTATACAGCAGATAAACTCCATTTTTGct  
cgagctggcgaattcc  
>CD\_NM\_003808.2:1309  
CgCctGcgagtctGGtatGCGGAGACTCTATTCCGATGTATTTCAAGAGAATACATCGGAATAGAGTCTCCTTTTTTGct  
cgagctggcgaattcc  
>CD\_NM\_003808.2:872  
CgCctGcgagtctGGtatGCGCCATGGCTCTGCTGACCCAATTCAAGAGATTGGGTCAGCAGAGCCATGGCATTTTTGct  
cgagctggcgaattcc  
>CD\_NM\_003808.2:1315  
CgCctGcgagtctGGtatGATCTATTCCGATGTATAAGAAGTTCAAGAGACTTCTTATACATCGGAATAGAGTTTTTGct  
cgagctggcgaattcc  
>CD\_NM\_003808.2:1429  
CgCctGcgagtctGGtatGACCCGGGCAAGGGCGAACTTAATTCAAGAGATTAAGTTTCGCCCTTGCCCGGGTTTTTGct  
cgagctggcgaattcc  
>CD\_NM\_003808.2:977  
CgCctGcgagtctGGtatGATGGCAGAGTCTCCCGGAGCAGTTCAAGAGACTGCTCCGGGAGACTCTGCCAGTTTTTGct  
cgagctggcgaattcc  
>CD\_NM\_003808.2:1193  
CgCctGcgagtctGGtatGCGGATATGGTGTCCGAATCCAGTTCAAGAGACTGGATTCCGACACCATATCCTTTTTTGct  
cgagctggcgaattcc  
>CD\_NM\_003808.2:1188  
CgCctGcgagtctGGtatGACCCAAGGATATGGTGTCCGAATTCAAGAGATTCGGACACCATATCCTTGGGCTTTTTTGct  
cgagctggcgaattcc  
>CD\_NM\_003808.2:979  
CgCctGcgagtctGGtatGAGCAGAGTCTCCCGGAGCAGAGTTCAAGAGACTCTGCTCCGGGAGACTCTGCCTTTTTTGct  
cgagctggcgaattcc  
>CD\_NM\_003808.2:1405  
CgCctGcgagtctGGtatGAGGATATTCTGAGTGTGTCATAATTTCAAGAGAATTATGACACTCAGAATATCCCCTTTTTGct  
cgagctggcgaattcc  
>CD\_NM\_003808.2:804  
CgCctGcgagtctGGtatGATCAGAGAGCCGGCACTCTCAGTTCAAGAGACTGAGAGTGCCGGCTCTCTGACTTTTTGct  
cgagctggcgaattcc  
>CD\_NM\_003808.2:1122  
CgCctGcgagtctGGtatGCAGGATGACTCCGATGTGACAGTTCAAGAGACTGTCACATCGGAGTCATCCTTTTTTGct  
cgagctggcgaattcc  
>CD\_NM\_003808.2:902  
CgCctGcgagtctGGtatGACTGCAGAGCCTCAGGAGAGAGTTCAAGAGACTCTCTCCTGAGGCTCTGCAGTTTTTGct  
cgagctggcgaattcc  
>CD\_NM\_003808.2:1102

CgCctGcgagtctGGtatGCTCCCATTAACGCCACCTCCAATTCAAGAGATTGGAGGTGGCGTTAATGGGAATTTTTGct  
cgagctggcgaattcc  
>CD\_NM\_003808.2:1088  
CgCctGcgagtctGGtatGCGTCTTGACCTGGTTCCCATTTTTCAAGAGAAATGGGAACCAGGTGCAGGACATTTTTGct  
cgagctggcgaattcc  
>CD\_NM\_003808.2:996  
CgCctGcgagtctGGtatGAAGAGTTCCGATGCCCTGGAAGTTCAAGAGACTTCCAGGGCATCGGAACCTGTTTTGct  
cgagctggcgaattcc  
>CD\_NM\_003808.2:1379  
CgCctGcgagtctGGtatGAGCAGGTGTCTTCCATTTACTTCAAGAGAGTGTAAATGGAAGACACCTGCGTTTTGct  
cgagctggcgaattcc  
>CD\_NM\_003808.2:1446  
CgCctGcgagtctGGtatGATTAACCTCTCTCCACATGGAATTCAAGAGATTCCATGTGGAGAGAGGTTAAGTTTTGct  
cgagctggcgaattcc  
>CD\_NM\_003808.2:823  
CgCctGcgagtctGGtatGAAGTTGCCCTCTGGTTGAGTTGTTCAAGAGACAACCTCAACCAGAGGGCAACTGTTTTGct  
cgagctggcgaattcc  
>CD\_NM\_003808.2:1357  
CgCctGcgagtctGGtatGAGGCCTACAACAGCTGCTATAGTTCAAGAGACTATAGCAGCTGTTGTAGGCCTTTTGct  
cgagctggcgaattcc  
>CD\_NM\_003808.2:747  
CgCctGcgagtctGGtatGACCTCATCTCCTTTCTTGCTAGTTCAAGAGACTAGCAAGAAAGGAGATGAGGCTTTTTGct  
cgagctggcgaattcc  
>CD\_NM\_003808.2:1178  
CgCctGcgagtctGGtatGCGGCCTACAGGCCAAGGATATTTCAAGAGAATATCCTTGGGCCTGTAGGCCTTTTGct  
cgagctggcgaattcc  
>CD\_NM\_003808.2:1376  
CgCctGcgagtctGGtatGCAGCGCAGGTGTCCTCCATTTATTCAAGAGATAAATGGAAGACACCTGCGCTATTTTTGct  
cgagctggcgaattcc  
>CD\_NM\_003808.2:1208  
CgCctGcgagtctGGtatGCATCCAGGATGCTGGAGTTTATTTCAAGAGAATAAACTCCAGCATCCTGGATTTTTGct  
cgagctggcgaattcc  
>CD\_NM\_003808.2:1409  
CgCctGcgagtctGGtatGCATTCTGAGTGTCTATAATTCCTTCAAGAGAGGGAATTATGACACTCAGAATTTTTGct  
cgagctggcgaattcc  
>CD\_NM\_003808.2:1430  
CgCctGcgagtctGGtatGACGGGCAAGGGCGAAACTTCAAGAGAGTTAAGTTTCGCCCTTGCCCGTTTTGct  
cgagctggcgaattcc  
>CD\_NM\_003808.2:1152  
CgCctGcgagtctGGtatGCGGCAACCAGCTCTTAGGCGTGTTCAGAGACACGCCTAAGAGCTGGTTGCCATTTTTGct  
cgagctggcgaattcc  
>CD\_NM\_003808.2:1007  
CgCctGcgagtctGGtatGCGCCCTGGAAGCCTGGGAGAATTTCAAGAGAATTTCTCCAGGCTTCCAGGGCATTTTTGct  
cgagctggcgaattcc  
>CD\_NM\_006573:666  
CgCctGcgagtctGGtatGCGCCGTTCAAGGTTCCAGAAGAATTCAAGAGATTCTTCTGGACCCTGAACGGCATTTTTGct  
cgagctggcgaattcc  
>CD\_NM\_006573:764  
CgCctGcgagtctGGtatGCTCCATGGCTTCTCAGCTTTAATTCAAGAGATTAAAGCTGAGAAGCCATGGAATTTTTGct  
cgagctggcgaattcc  
>CD\_NM\_006573:584  
CgCctGcgagtctGGtatGAAGCTGTCACCGCGGGACTGAATTCAAGAGATTCAAGTCCCGGGTGACAGCTTTTTGct  
cgagctggcgaattcc  
>CD\_NM\_006573:298

CgCctGcgagtctGGtatGAGCCTTACTTCTTGCCTTAAGATTCAAGAGATCTTAAGGCAAGAAGTAAGGCGTTTTTGct  
cgagctggcgaattcc  
>CD\_NM\_006573:943  
CgCctGcgagtctGGtatGATGGTGACTTTGTTTCGATGTATTCAAGAGATACATCGAAACAAAGTCACCAGTTTTTGct  
cgagctggcgaattcc  
>CD\_NM\_006573:999  
CgCctGcgagtctGGtatGATGCTATTCAGCTGGCATTGCATTCAAGAGATGCAATGCCAGCTGAATAGCAGTTTTTGct  
cgagctggcgaattcc  
>CD\_NM\_006573:295  
CgCctGcgagtctGGtatGCCACGCCTTACTTCTTGCCTTATTCAAGAGATAAGGCAAGAAGTAAGGCGTGATTTTTGct  
cgagctggcgaattcc  
>CD\_NM\_006573:932  
CgCctGcgagtctGGtatGCTGAATTGAGTCTGGTGACTTTTTCAAGAGAAAAGTCACCAGACTCAATTCATTTTTTGct  
cgagctggcgaattcc  
>CD\_NM\_006573:972  
CgCctGcgagtctGGtatGCATGCCTGAAACACTACCCAATTTCAAGAGAATTGGGTAGTGTTCAGGCATATTTTTGct  
cgagctggcgaattcc  
>CD\_NM\_006573.3:720  
CgCctGcgagtctGGtatGAACAGTGAAACACCAACTATACTTCAAGAGAGTATAGTTGGTGTTCCTGTCTTTTTGct  
cgagctggcgaattcc  
>CD\_NM\_006573.3:945  
CgCctGcgagtctGGtatGATGACTTTGTTTCGATGTATTCTTCAAGAGAGAATACATCGAAACAAAGTCACTTTTGct  
cgagctggcgaattcc  
>CD\_NM\_006573.3:295  
CgCctGcgagtctGGtatGAACGCCTTACTTCTTGCCTTAATTTCAAGAGATTAAGGCAAGAAGTAAGGCGTGTTTTTGct  
cgagctggcgaattcc  
>CD\_NM\_006573.3:701  
CgCctGcgagtctGGtatGATGCTTGCAACTGATTGCAGACTTCAAGAGAGTCTGCAATCAGTTGCAAGCAGTTTTTGct  
cgagctggcgaattcc  
>CD\_NM\_006573.3:641  
CgCctGcgagtctGGtatGAAGTCAGAACAGCAGAAATAAGTTCAAGAGACTTATTTCTGCTGTTCTGACTGTTTTTGct  
cgagctggcgaattcc  
>CD\_NM\_006573.3:320  
CgCctGcgagtctGGtatGCAGAGAAGAAATGAAACTGAAGTTCAAGAGACTTCAGTTTCATTTCTTCTTTTTTGct  
cgagctggcgaattcc  
>CD\_NM\_006573.3:443  
CgCctGcgagtctGGtatGATGCCTCACGGTGGTGTCTTTCTTCAAGAGAGAAAGACACCACCGTGAGGCAGTTTTTGct  
cgagctggcgaattcc  
>CD\_NM\_006573.3:666  
CgCctGcgagtctGGtatGACCGTTCAGGGTCCAGAAGAAATTTCAAGAGATTTCTTCTGGACCTGAACGGCTTTTTGct  
cgagctggcgaattcc  
>CD\_NM\_006573.3:943  
CgCctGcgagtctGGtatGCGGTGACTTTGTTTCGATGTATTTCAAGAGAATACATCGAAACAAAGTCACCATTTTTGct  
cgagctggcgaattcc  
>CD\_NM\_006573.3:714  
CgCctGcgagtctGGtatGCTTGACAGACAGTGAAACACCAATTTCAAGAGATTGGTGTTCCTGTCTGCAATTTTTTGct  
cgagctggcgaattcc  
>CD\_NM\_006573.3:276  
CgCctGcgagtctGGtatGCCACAGAAAGGGAGCAGTCACTTCAAGAGAGTACTGCTCCCTTTCTGTGGATTTTTGct  
cgagctggcgaattcc  
>CD\_NM\_006573.3:985  
CgCctGcgagtctGGtatGCACCCAATAATTCCTGCTATTCTTCAAGAGAGAATAGCAGGAATTATTGGGTATTTTTGct  
cgagctggcgaattcc  
>CD\_NM\_006573.3:764

CgCctGcgagtctGGtatGCCCATGGCTTCTCAGCTTTAAATTCAAGAGATTTAAAGCTGAGAAGCCATGGATTTTTGct  
cgagctggcgaattcc  
>CD\_NM\_006573.3:890  
CgCctGcgagtctGGtatGAGGACATCTAATTCAGAGGAAGTTCAAGAGACTTCCTCTGAATTAGATGTCCCTTTTTGct  
cgagctggcgaattcc  
>CD\_NM\_006573.3:753  
CgCctGcgagtctGGtatGCACACATTTGTTCCATGGCTTCTTCAAGAGAGAAGCCATGGAACAAATGTGTATTTTTGct  
cgagctggcgaattcc  
>CD\_NM\_006573.3:880  
CgCctGcgagtctGGtatGACTACGCCATGGGACATCTAATTTCAAGAGAATTAGATGTCCCATGGCGTAGGTTTTGct  
cgagctggcgaattcc  
>CD\_NM\_006573.3:905  
CgCctGcgagtctGGtatGAAGGAAGAAGGTCATGTCTTTTTCAAGAGAAAAGACATGGACCTTCTTCTCTTTTTGct  
cgagctggcgaattcc  
>CD\_NM\_006573.3:996  
CgCctGcgagtctGGtatGCCCTGCTATTCAGCTGGCATTGTTCAAGAGACAATGCCAGCTGAATAGCAGGATTTTTGct  
cgagctggcgaattcc  
>CD\_NM\_006573.3:430  
CgCctGcgagtctGGtatGAACTGCTGTCTTGCTGCCTCACTTCAAGAGAGTGAGGCAGCAAGACAGCAGTGTTTTTGct  
cgagctggcgaattcc  
>CD\_NM\_006573.3:628  
CgCctGcgagtctGGtatGAAGAAGGCAACTCCAGTCAGAATTCAGAGATTTCTGACTGGAGTTGCCTTCTTTTTGct  
cgagctggcgaattcc  
>CD\_NM\_006573.3:976  
CgCctGcgagtctGGtatGATGAAACACTACCCAATAATTTCAAGAGAGAATTATTGGGTAGTGTTCAGTTTTGct  
cgagctggcgaattcc  
>CD\_NM\_006573.3:299  
CgCctGcgagtctGGtatGACTTACTTCTTGCCTTAAGAAATTCAGAGATTTCTTAAGGCAAGAAGTAAGTTTTGct  
cgagctggcgaattcc  
>CD\_NM\_006573.3:932  
CgCctGcgagtctGGtatGCGAATTGAGTCTGGTGACTTTGTTCAAGAGACAAAGTCACCAGACTCAATTCATTTTTGct  
cgagctggcgaattcc  
>CD\_NM\_006573.3:584  
CgCctGcgagtctGGtatGCGCTGTCACCGCGGACTGAAATTCAGAGATTTCTAGTCCC GGGTGACAGCTTTTTGct  
cgagctggcgaattcc  
>CD\_NM\_003807:773  
CgCctGcgagtctGGtatGAGGGCCCTTGTGGTCAACAAAGTTCAAGAGACTTTGGTGACCACAAGGGCCCTTTTTGct  
cgagctggcgaattcc  
>CD\_NM\_003807:982  
CgCctGcgagtctGGtatGAAGCTTCTGGGTGGTGTGGTATTCAAGAGATACCACACCACCCAGGAAGCTGTTTTGct  
cgagctggcgaattcc  
>CD\_NM\_003807:1062  
CgCctGcgagtctGGtatGCGCGTGATGGTACCCGGTCTTATTCAAGAGATAAGACCGGGTACCATCACGCATTTTTGct  
cgagctggcgaattcc  
>CD\_NM\_003807:495  
CgCctGcgagtctGGtatGCGGGTCTGGGTCTTTGCTGTTTTCAAGAGAAACAGCAAGAGACCCAGACCCATTTTTGct  
cgagctggcgaattcc  
>CD\_NM\_003807:392  
CgCctGcgagtctGGtatGCGTGTCGTACGGCCCTCAGTGTTTTCAAGAGAACACTGAGGGCCGTACGACACTTTTTGct  
cgagctggcgaattcc  
>CD\_NM\_003807.2:618  
CgCctGcgagtctGGtatGATGGGAGCAGCTGATACAAGAGTTCAAGAGACTCTTGTATCAGCTGCTCCAGTTTTGct  
cgagctggcgaattcc  
>CD\_NM\_003807.2:1026

CgCtGcgagtctGGtatGAGTCGTCCGTGTGCTGGATGAATTCAAGAGATTCATCCAGCACACGGACGACCTTTTTTGct  
cgagctggcgaattcc  
>CD\_NM\_003807.2:495  
CgCtGcgagtctGGtatGAGGTCTGGGTCTCTTGCTGTTGTTCAAGAGACAACAGCAAGAGACCCAGACCTTTTTTGct  
cgagctggcgaattcc  
>CD\_NM\_003807.2:501  
CgCtGcgagtctGGtatGAGGTCTCTTGCTGTTGCTGATGTTCAAGAGACATCAGCAACAGCAAGAGACCTTTTTTGct  
cgagctggcgaattcc  
>CD\_NM\_003807.2:658  
CgCtGcgagtctGGtatGCACCCAGCAGCGCATCTCACAGTTCAAGAGACTGTGAGATGCGCTGCTGGGTTTTTTTTGct  
cgagctggcgaattcc  
>CD\_NM\_003807.2:982  
CgCtGcgagtctGGtatGCGCTTCTGGGTGGTGTGGTACTTCAAGAGAGTACCACACCACCCAGGAAGCTTTTTTGct  
cgagctggcgaattcc  
>CD\_NM\_003807.2:731  
CgCtGcgagtctGGtatGCGCTGGGCCCTGGCCTTCTGAGTTCAAGAGACTCAGGAAGGCCAGGCCAGCTTTTTTGct  
cgagctggcgaattcc  
>CD\_NM\_003807.2:959  
CgCtGcgagtctGGtatGACTCCCGGGTCTGGTGGGACAGTTCAAGAGACTGTCCCACCAGACCCGGGAGCTTTTTTGct  
cgagctggcgaattcc  
>CD\_NM\_003807.2:403  
CgCtGcgagtctGGtatGACCTCAGTGTTTGTGGTGGATGTTCAAGAGACATCCACCACAAACACTGAGGGTTTTTGct  
cgagctggcgaattcc  
>CD\_NM\_003807.2:423  
CgCtGcgagtctGGtatGCGGACAGACCGACATCCCATTCTTCAAGAGAGAATGGGATGTCCGCTGTCCATTTTTTGct  
cgagctggcgaattcc  
>CD\_NM\_003807.2:1062  
CgCtGcgagtctGGtatGACGTGATGGTACCCGGTCTTACTTCAAGAGAGTAAGACCGGGTACCATCACGCTTTTTTGct  
cgagctggcgaattcc  
>CD\_NM\_003807.2:399  
CgCtGcgagtctGGtatGCCGGCCCTCAGTGTTTGTGGTGTTCAGAGACACCACAAACACTGAGGGCCGTTTTTGct  
cgagctggcgaattcc  
>CD\_NM\_003807.2:489  
CgCtGcgagtctGGtatGACGGGTGGGTCTGGGTCTCTTGTTCAAGAGACAAGAGACCCAGACCCACCCGTTTTTGct  
cgagctggcgaattcc  
>CD\_NM\_003807.2:869  
CgCtGcgagtctGGtatGACCACGGCCTCTACAAGCGCACTTCAAGAGAGTGCGCTTGTAGAGGCCGTGGTTTTTGct  
cgagctggcgaattcc  
>CD\_NM\_003807.2:561  
CgCtGcgagtctGGtatGACTGCACTGGCGTCTAGGAGAGTTCAAGAGACTCTCCTAGACGCCAGTGCAGCTTTTTTGct  
cgagctggcgaattcc  
>CD\_NM\_003807.2:582  
CgCtGcgagtctGGtatGAATGGTCACCCGCCTGCCTGACTTCAAGAGAGTCAGGCAGGCGGGTGACCATTTTTTGct  
cgagctggcgaattcc  
>CD\_NM\_003807.2:1052  
CgCtGcgagtctGGtatGCGGTTGACTGCGTGATGGTACTTCAAGAGAGTACCATCACGCAGTCGAACCATTTTTTGct  
cgagctggcgaattcc  
>CD\_NM\_003807.2:792  
CgCtGcgagtctGGtatGCGCTGGCTACTACTACATCTACTTCAAGAGAGTAGATGTAGTAGTAGCCAGCTTTTTTGct  
cgagctggcgaattcc  
>CD\_NM\_003807.2:639  
CgCtGcgagtctGGtatGACGAAGGTCTCACGAGGTCAACTTCAAGAGAGTTGACCTCGTGAGACCTTCGTTTTTGct  
cgagctggcgaattcc  
>CD\_NM\_003807.2:392

CgCctGcgagtctGGtatGATGTCGTACGGCCCTCAGTGTTCCTCAAGAGAAACACTGAGGGCCGTACGACACTTTTTTGct  
cgagctggcgaattcc  
>CD\_NM\_003807.2:987  
CgCctGcgagtctGGtatGACTGGGTGGTGTGGTACACCTGTTCAAGAGACAGGTGTACCACACCACCCAGTTTTTTGct  
cgagctggcgaattcc  
>CD\_NM\_003807.2:720  
CgCctGcgagtctGGtatGCTGGGAGACTCAGCTGGGCCTGTTCAAGAGACAGGCCAGCTGAGTCTCCATTTTTTTGct  
cgagctggcgaattcc  
>CD\_NM\_003807.2:905  
CgCctGcgagtctGGtatGCGGAGCTGGAGCTGTTGGTCAGTTCAAGAGACTGACCAACAGCTCCAGCTCCTTTTTTTGct  
cgagctggcgaattcc  
>CD\_NM\_003807.2:984  
CgCctGcgagtctGGtatGATTCCTGGGTGGTGTGGTACACTTCAAGAGAGTGTACCACACCACCCAGGAAGTTTTTTGct  
cgagctggcgaattcc  
>CD\_NM\_003807.2:615  
CgCctGcgagtctGGtatGATCCTGGGAGCAGCTGATACAATTCAAGAGATTGTATCAGCTGCTCCAGGAGTTTTTTGct  
cgagctggcgaattcc  
>CD\_NM\_003807.2:616  
CgCctGcgagtctGGtatGCCCTGGGAGCAGCTGATACAAGTTCAAGAGACTTGTATCAGCTGCTCCAGGATTTTTTTGct  
cgagctggcgaattcc  
>CD\_NM\_003807.2:726  
CgCctGcgagtctGGtatGAACTCAGCTGGGCCTGGCCTTCTTCAAGAGAGAAGGCCAGGCCAGCTGAGTCTTTTTTTGct  
cgagctggcgaattcc  
>CD\_NM\_003807.2:405  
CgCctGcgagtctGGtatGATCAGTGTTCCTGGTGGATGGATTCAAGAGATCCATCCACCACAAACACTGAGTTTTTTGct  
cgagctggcgaattcc  
>CD\_NM\_003844:1296  
CgCctGcgagtctGGtatGCTGCTGATGAAATGGGTCAACATTCAAGAGATGTTGACCCATTTTCATCAGCATTTTTTTGct  
cgagctggcgaattcc  
>CD\_NM\_003844:395  
CgCctGcgagtctGGtatGAATCAAACCTTCATGATCAATCATTCAAGAGATGATTGATCATGAAGTTTGATTTTTTTGct  
cgagctggcgaattcc  
>CD\_NM\_003844:834  
CgCctGcgagtctGGtatGATGCTGATTGTCTGTTGTTGCATTTCAAGAGATGCAACAACAGACAATCAGCACTTTTTTTGct  
cgagctggcgaattcc  
>CD\_NM\_003844:640  
CgCctGcgagtctGGtatGAAGGAACTTTCGGAAATGACAATTCAAGAGATTGTCATTCCGAAAAGTTCCTGTTTTTTGct  
cgagctggcgaattcc  
>CD\_NM\_003844:772  
CgCctGcgagtctGGtatGCTGGACATAATATATGGGTGATTTCAAGAGAATCACCCATATATTATGTCCATTTTTTTGct  
cgagctggcgaattcc  
>CD\_NM\_003844.2:617  
CgCctGcgagtctGGtatGCACACAGCATGTCAGTGCAAACCTTCAAGAGAGTTTGCCTGACATGCTGTGTTTTTTTgct  
cgagctggcgaattcc  
>CD\_NM\_003844.2:1144  
CgCctGcgagtctGGtatGAACTGAGACTCTGATGCTGTTCTTCAAGAGAGAACAGCATCAGAGTCTCAGTGTTTTTTTGct  
cgagctggcgaattcc  
>CD\_NM\_003844.2:834  
CgCctGcgagtctGGtatGCGCTGATTGTCTGTTGTTGCATTTCAAGAGAATGCAACAACAGACAATCAGCATTTTTTTGct  
cgagctggcgaattcc  
>CD\_NM\_003844.2:1152  
CgCctGcgagtctGGtatGATCTGATGCTGTTCTTTGACAATTCAAGAGATTGTCAAAGAACAGCATCAGAGTTTTTTGct  
cgagctggcgaattcc  
>CD\_NM\_003844.2:1150

CgCctGcgagtctGGtatGAACTCTGATGCTGTTCTTTGACTTCAAGAGAGTCAAAGAACAGCATCAGAGTCTTTTTGct  
cgagctggcgaattcc  
>CD\_NM\_003844.2:742  
CgCctGcgagtctGGtatGAATCGAGTGTGTCCACAAAGAATTCAAGAGATTCTTTGTGGACACACTCGATGTTTTGct  
cgagctggcgaattcc  
>CD\_NM\_003844.2:461  
CgCctGcgagtctGGtatGACACCAGGATCTCATAGATCAGTTCAAGAGACTGATCTATGAGATCCTGGTGGTTTTGct  
cgagctggcgaattcc  
>CD\_NM\_003844.2:1201  
CgCctGcgagtctGGtatGATGGGACCAGCTCATGAGGCAGTTCAAGAGACTGCCTCATGAGCTGGTCCCAGTTTTGct  
cgagctggcgaattcc  
>CD\_NM\_003844.2:1453  
CgCctGcgagtctGGtatGCGCCGTGTCTTGGAGTGAAAGTTCAAGAGACTTTCCTCAAGGACACGGCATTTTTTGct  
cgagctggcgaattcc  
>CD\_NM\_003844.2:557  
CgCctGcgagtctGGtatGATCCCATGTACAGCTTGTAATTTCAAGAGAATTTACAAGCTGTACATGGGAGTTTTGct  
cgagctggcgaattcc  
>CD\_NM\_003844.2:700  
CgCctGcgagtctGGtatGAAGAGGGATGGTCAAGGTCAAGTTCAAGAGACTTGACCTTGACCATCCCTCTGTTTTGct  
cgagctggcgaattcc  
>CD\_NM\_003844.2:740  
CgCctGcgagtctGGtatGAACATCGAGTGTGTCCACAAAGTTCAAGAGACTTTGTGGACACACTCGATGTTTTGct  
cgagctggcgaattcc  
>CD\_NM\_003844.2:395  
CgCctGcgagtctGGtatGCTCAAACCTTCATGATCAATCAATTTCAAGAGATTGATTGATCATGAAGTTTGATTTTTGct  
cgagctggcgaattcc  
>CD\_NM\_003844.2:68  
CgCctGcgagtctGGtatGACGCCACCACCAGCTAGAGTACTTCAAGAGAGTACTCTAGCTGGTGGTGGCGTTTTGct  
cgagctggcgaattcc  
>CD\_NM\_003844.2:391  
CgCctGcgagtctGGtatGCACCATCAAACCTTCATGATCAATTTCAAGAGATTGATCATGAAGTTTGATGGTTTTGct  
cgagctggcgaattcc  
>CD\_NM\_003844.2:569  
CgCctGcgagtctGGtatGACTTGTAATCAGATGAAGAAGTTCAAGAGACTTCTTCATCTGATTTACAAGCTTTTTGct  
cgagctggcgaattcc  
>CD\_NM\_003844.2:992  
CgCctGcgagtctGGtatGATCTCTGAGCAGCAAATGGAAATTTCAAGAGATTTCCATTTGCTGCTCAGAGACTTTTTGct  
cgagctggcgaattcc  
>CD\_NM\_003844.2:1082  
CgCctGcgagtctGGtatGACGGCAGAAGCTGAAGGGTCTCTTCAAGAGAGAGACCCTTCAGCTTCTGCCGGTTTTGct  
cgagctggcgaattcc  
>CD\_NM\_003844.2:1393  
CgCctGcgagtctGGtatGAATTCAGGACCTCTTGGTGGACTTCAAGAGAGTCCACCAAGAGGTCTGAATCTTTTTGct  
cgagctggcgaattcc  
>CD\_NM\_003844.2:1296  
CgCctGcgagtctGGtatGCGCTGATGAAATGGGTCAACAATTTCAAGAGATTGTTGACCCATTTTCATCAGCATTTTTGct  
cgagctggcgaattcc  
>CD\_NM\_003844.2:738  
CgCctGcgagtctGGtatGATGACATCGAGTGTGTCCACAATTTCAAGAGATTGTGGACACACTCGATGTCATTTTTGct  
cgagctggcgaattcc  
>CD\_NM\_003844.2:970  
CgCctGcgagtctGGtatGAGCAGACTCGCTGTCCACTTCTTCAAGAGAGAAAGTGGACAGCGAGTCTGCGTTTTGct  
cgagctggcgaattcc  
>CD\_NM\_003844.2:823

CgCctGcgagtctGGtatGATTGGTGGCTGTGCTGATTGTCTTCAAGAGAGACAATCAGCACAGCCACCAACTTTTTTGct  
cgagctggcgaattcc  
>CD\_NM\_003844.2:392  
CgCctGcgagtctGGtatGCCATCAAACCTTCATGATCAATTTCAAGAGAATTGATCATGAAGTTTGTGTTTTTTGct  
cgagctggcgaattcc  
>CD\_NM\_003844.2:510  
CgCctGcgagtctGGtatGAAGAGGGTGTGGGTACACCAATTC AAGAGATTGGTGTAAACCCACACCCCTCTGTTTTTTGct  
cgagctggcgaattcc  
>CD\_NM\_003844.2:1061  
CgCctGcgagtctGGtatGAAGGCACAGTGTCTGCTGGGACTTCAAGAGAGTCCCAGCAGACACTGTGCCTCTTTTTTGct  
cgagctggcgaattcc  
>CD\_NM\_003844.2:1285  
CgCctGcgagtctGGtatGATTGTATGCAATGCTGATGAAATTC AAGAGATTCATCAGCATTGCATACAAGTTTTTTGct  
cgagctggcgaattcc  
>CD\_NM\_003844.2:100  
CgCctGcgagtctGGtatGATTCTGGCAGTACTCCGAATTTCAAGAGAATTCGGAGTCACTGCCAGGAACTTTTTTGct  
cgagctggcgaattcc  
>CD\_NM\_003842:559  
CgCctGcgagtctGGtatGCGAGATTGCATCTCCTGCAAATTTCAAGAGAATTTGCAGGAGATGCAATCTTTTTTTGct  
cgagctggcgaattcc  
>CD\_NM\_003842:1438  
CgCctGcgagtctGGtatGCTGCTGATAAAGTGGGTCAACATTC AAGAGATGTTGACCCACTTTATCAGCATTTTTTTGct  
cgagctggcgaattcc  
>CD\_NM\_003842:1586  
CgCctGcgagtctGGtatGCTGCAGACTCTGCCATGTCTTATTC AAGAGATAGGACATGGCAGAGTCTGCATTTTTTTGct  
cgagctggcgaattcc  
>CD\_NM\_003842.3:684  
CgCctGcgagtctGGtatGCACACAGTGTGTCAGTGC AAGTTCAAGAGACTTCGCACTGACACACTGTGTTTTTTTgct  
cgagctggcgaattcc  
>CD\_NM\_003842.3:992  
CgCctGcgagtctGGtatGATGGAAGAAAGTCCTTCTTACTTCAAGAGAGTAAGGAAGGACTTTCTTCCACTTTTTTTGct  
cgagctggcgaattcc  
>CD\_NM\_003842.3:1586  
CgCctGcgagtctGGtatGCGCAGACTCTGCCATGTCTTAATTC AAGAGATTAGGACATGGCAGAGTCTGCATTTTTTTGct  
cgagctggcgaattcc  
>CD\_NM\_003842.3:1343  
CgCctGcgagtctGGtatGATGGGAGCCGCTCATGAGGAAGTTCAAGAGACTTCCTCATGAGCGGCTCCCAGTTTTTTGct  
cgagctggcgaattcc  
>CD\_NM\_003842.3:1438  
CgCctGcgagtctGGtatGCGCTGATAAAGTGGGTCAACAATTC AAGAGATTGTTGACCCACTTTATCAGCATTTTTTTGct  
cgagctggcgaattcc  
>CD\_NM\_003842.3:559  
CgCctGcgagtctGGtatGAAGATTGCATCTCCTGCAAATATTC AAGAGATATTTGCAGGAGATGCAATCTTTTTTTGct  
cgagctggcgaattcc  
>CD\_NM\_003842.3:807  
CgCctGcgagtctGGtatGAACATCGAATGTGTCCACAAAGTTCAAGAGACTTTGTGGACACATTCGATGTCTTTTTTTGct  
cgagctggcgaattcc  
>CD\_NM\_003842.3:967  
CgCctGcgagtctGGtatGATGTGTTTGTGTTGCAAGTCTTTTTTCAAGAGAAAAGACTTGCAAACAAACACAGTTTTTTGct  
cgagctggcgaattcc  
>CD\_NM\_003842.3:516  
CgCctGcgagtctGGtatGAAGGGATTGTGTCCACCTGGACTTCAAGAGAGTCCAGGTGGACACAATCCCTCTTTTTTTGct  
cgagctggcgaattcc  
>CD\_NM\_003842.3:533



CgCtGcgagtctGGtatGCGGACACCATATCTCAGAAGACTTCAAGAGAGTCTTCTGAGATATGGTGTCCATTTTTGct  
cgagctggcgaattcc  
>CD\_NM\_003842.3:1085  
CgCtGcgagtctGGtatGCGAGGACAATGTCCTCAATGAGTTCAAGAGACTCATTGAGGACATTGTCCTCATTTTTTGct  
cgagctggcgaattcc  
>CD\_NM\_003842.3:900  
CgCtGcgagtctGGtatGACCTCTCCCTGTTCTCTCTCAGTTCAAGAGACTGAGAGAGAACAGGGAGAGGCTTTTTGct  
cgagctggcgaattcc  
>CD\_NM\_003842.3:1224  
CgCtGcgagtctGGtatGACGGCAGAAGCTGAAAGGTCTCTTCAAGAGAGAGACCTTTCAGCTTCTGCCGGTTTTGct  
cgagctggcgaattcc  
>CD\_NM\_003842.3:777  
CgCtGcgagtctGGtatGATCAAGGTCGGTGATTGTACACTTCAAGAGAGTGTACAATCACCGACCTTGACTTTTTGct  
cgagctggcgaattcc  
>CD\_NM\_003842.3:1543  
CgCtGcgagtctGGtatGCCACTTGTGAGCTCTGGAAATTCAAGAGATTTCCAGAGCTCAACAAGTGGTTTTTTGct  
cgagctggcgaattcc  
>CD\_NM\_003842.3:1427  
CgCtGcgagtctGGtatGATTGTACACGATGCTGATAAAGTTCAAGAGACTTTATCAGCATCGTGTACAAGTTTTTTGct  
cgagctggcgaattcc  
>CD\_NM\_003842.3:1513  
CgCtGcgagtctGGtatGAAGAGAGACTTGCCAAGCAGAATTCAAGAGATTCTGCTTGGCAAGTCTCTCTTTTTGct  
cgagctggcgaattcc  
>CD\_NM\_003842.3:1004  
CgCtGcgagtctGGtatGACTTCCTTACCTGAAAGGCATCTTCAAGAGAGATGCCTTTCAGGTAAGGAAGTTTTTTGct  
cgagctggcgaattcc  
>CD\_NM\_003842.3:761  
CgCtGcgagtctGGtatGATGTCCCAGAGGGATGGTCAAGTTCAAGAGACTTGACCATCCCTCTGGGACACTTTTTGct  
cgagctggcgaattcc  
>CD\_NM\_003842.3:1134  
CgCtGcgagtctGGtatGATCCCTGAGCAGGAAATGGAAGTTCAAGAGACTTCCATTTCTGCTCAGGGACTTTTTGct  
cgagctggcgaattcc  
>CD\_NM\_003842.3:1319  
CgCtGcgagtctGGtatGCGCAGACTTGGTGCCCTTTGACTTCAAGAGAGTCAAAGGGCACCAAGTCTGCATTTTTGct  
cgagctggcgaattcc  
>CD\_NM\_003842.3:1108  
CgCtGcgagtctGGtatGCCGTGAGTATCTTGCAGCCACTTCAAGAGAGTGGGCTGCAAGATACTCACGATTTTTGct  
cgagctggcgaattcc  
>CD\_NM\_003842.3:1044  
CgCtGcgagtctGGtatGAACCCTGAGCGTGTGGACAGAATTCAAGAGATTCTGTCCACACGCTCAGGGTCTTTTTGct  
cgagctggcgaattcc  
>CD\_NM\_003842.3:809  
CgCtGcgagtctGGtatGAATCGAATGTGTCCACAAAGAATTCAAGAGATTCTTTGTGGACACATTCGATTTTTTTGct  
cgagctggcgaattcc  
>CD\_NM\_003842.3:1414  
CgCtGcgagtctGGtatGACCACAGGGACACCTTGTACACTTCAAGAGAGTGTACAAGGTGTCCCTGTGGCTTTTTGct  
cgagctggcgaattcc  
>CD\_NM\_003842.3:1565  
CgCtGcgagtctGGtatGATTCATGTATCTAGAAGGTAATTTCAAGAGAATTACCTTCTAGATACATGAACTTTTTTGct  
cgagctggcgaattcc  
>CD\_NM\_003842.3:543  
CgCtGcgagtctGGtatGCTCTCAGAAGACGGTAGAGATTTTCAAGAGAAATCTCTACCGTCTTCTGAGATTTTTTTGct  
cgagctggcgaattcc  
>CD\_NM\_003842.3:911

CgCtGcgagtctGGtatGCTCTCTCTCAGGCATCATCATATTCAAGAGATATGATGATGCCTGAGAGAGAATTTTTGct  
cgagctggcgaattcc  
>CD\_NM\_003842.3:973  
CgCtGcgagtctGGtatGCTGTTTGCAAGTCTTTACTGTGTTCAAGAGACACAGTAAAGACTTGCAAACAATTTTTGct  
cgagctggcgaattcc  
>CD\_NM\_003842.3:885  
CgCtGcgagtctGGtatGCGCCAGGGACTCCTGCCTCTTCAAGAGAGAGAGGCAGGAGTCCCTGGGCTTTTTTGct  
cgagctggcgaattcc  
>CD\_NM\_003841:430  
CgCtGcgagtctGGtatGCACGCTTCCAACAATGAACCTTTTTCAAGAGAAAGGTTTCATTGTTGGAAGCGTTTTTTGct  
cgagctggcgaattcc  
>CD\_NM\_003841:629  
CgCtGcgagtctGGtatGACTGGGATGATATCCAGTGTGTTTCAAGAGAACACACTGGATATCATCCCAGGTTTTTGct  
cgagctggcgaattcc  
>CD\_NM\_003841:897  
CgCtGcgagtctGGtatGAGGGACTCCTGCCTCTTCTCATTTCATTTCAAGAGAATGAGAAGAGGCAGGAGTCCCCTTTTGct  
cgagctggcgaattcc  
>CD\_NM\_003841:659  
CgCtGcgagtctGGtatGCTGGTGCCAATGCCACTGTGGATTCAAGAGATCCACAGTGGCATTGGCACCAATTTTTGct  
cgagctggcgaattcc  
>CD\_NM\_003841:934  
CgCtGcgagtctGGtatGCTCGTAGGGATCATAGTTCTAATTCAAGAGATTAGAACTATGATCCCTACGATTTTTTGct  
cgagctggcgaattcc  
>CD\_NM\_003841.2:516  
CgCtGcgagtctGGtatGAACACAGTGTGTCAGTGTAAAGTTCAAGAGACTTTACTACTGACACACTGTGTCTTTTTGct  
cgagctggcgaattcc  
>CD\_NM\_003841.2:514  
CgCtGcgagtctGGtatGAAGACACAGTGTGTCAGTGTAAATTCAAGAGATTACTACTGACACACTGTGTCTTTTTGct  
cgagctggcgaattcc  
>CD\_NM\_003841.2:961  
CgCtGcgagtctGGtatGCTCTGATTGTGTTTGTGTTTGAATTCAAGAGATTTCAAACAAACACAATCAGAATTTTTGct  
cgagctggcgaattcc  
>CD\_NM\_003841.2:251  
CgCtGcgagtctGGtatGACTGCTGCCAGTCCTAGCTTACTTCAAGAGAGTAAGCTAGGACTGGCAGCAGTTTTTGct  
cgagctggcgaattcc  
>CD\_NM\_003841.2:360  
CgCtGcgagtctGGtatGACAGCAGGATCTCATAGATCAGTTCAAGAGACTGATCTATGAGATCCTGCTGGTTTTTGct  
cgagctggcgaattcc  
>CD\_NM\_003841.2:636  
CgCtGcgagtctGGtatGAATATCCAGTGTGTTGAAGAATTTCAAGAGAAATTTCAACACACTGGATATTTTTTGct  
cgagctggcgaattcc  
>CD\_NM\_003841.2:953  
CgCtGcgagtctGGtatGCATTGTGCTTCTGATTGTGTTTTTCAAGAGAAAACACAATCAGAAGCACAATTTTTTTGct  
cgagctggcgaattcc  
>CD\_NM\_003841.2:456  
CgCtGcgagtctGGtatGCTCCCATGTACAGTTTGTAATTTCAAGAGAAATTTACAAACTGTACATGGGAATTTTTGct  
cgagctggcgaattcc  
>CD\_NM\_003841.2:638  
CgCtGcgagtctGGtatGCATCCAGTGTGTTGAAGAATTTTTCAAGAGAAAATTTCAACACACTGGATATTTTTGct  
cgagctggcgaattcc  
>CD\_NM\_003841.2:629  
CgCtGcgagtctGGtatGATGGGATGATATCCAGTGTGTTTTTCAAGAGAAACACACTGGATATCATCCCAGTTTTTGct  
cgagctggcgaattcc  
>CD\_NM\_003841.2:518

CgCctGcgagtctGGtatGAACAGTGTGTCAGTGTAAGAATTCAAGAGATTCTTTTACACTGACACACTGTGTTTTTGct  
cgagctggcgaattcc  
>CD\_NM\_003841.2:947  
CgCctGcgagtctGGtatGCGTTCTAATTGTGCTTCTGATTTTCAAGAGAAATCAGAAGCACAATTAGAACTTTTTTTGct  
cgagctggcgaattcc  
>CD\_NM\_003841.2:648  
CgCctGcgagtctGGtatGATTGAAGAATTTGGTGCCAATGTTCAAGAGACATTGGCACCAAATTCCTCAACTTTTTTGct  
cgagctggcgaattcc  
>CD\_NM\_003841.2:731  
CgCctGcgagtctGGtatGCGCTGCTGAAGAGACAATGAACTTCAAGAGAGTTCATTGTCTCTTCAGCAGCTTTTTTTGct  
cgagctggcgaattcc  
>CD\_NM\_003841.2:686  
CgCctGcgagtctGGtatGCGCTGCTGAAGAGACAATGAACTTCAAGAGAGTTCATTGTCTCTTCAGCAGCTTTTTTTGct  
cgagctggcgaattcc  
>CD\_NM\_003841.2:565  
CgCctGcgagtctGGtatGAAGAGATGTGCCGGAAGTGTAGTTCAAGAGACTACACTTCCGGCACATCTCTGTTTTTTGct  
cgagctggcgaattcc  
>CD\_NM\_003841.2:659  
CgCctGcgagtctGGtatGCGGTGCCAATGCCACTGTGGAATTCAAGAGATTCCACAGTGGCATTGGCACCATTTTTTTGct  
cgagctggcgaattcc  
>CD\_NM\_003841.2:913  
CgCctGcgagtctGGtatGATCATTACCTCTCATGCACCATTTCAAGAGAATGGTGCATGAGAGGTAATGAGTTTTTTGct  
cgagctggcgaattcc  
>CD\_NM\_003841.2:421  
CgCctGcgagtctGGtatGCTTACACCAACGCTTCCAACAATTTCAAGAGATTGTTGGAAGCGTTGGTGTAATTTTTTTGct  
cgagctggcgaattcc  
>CD\_NM\_003841.2:372  
CgCctGcgagtctGGtatGAATAGATCAGAACATACTGGAGTTCAAGAGACTCCAGTATGTTCTGATCTATGTTTTTTGct  
cgagctggcgaattcc  
>CD\_NM\_003841.2:279  
CgCctGcgagtctGGtatGCCACTGCCCGGCAGGAGGAAGTTCAAGAGACTTCCTCCTGCCGGGCAGTGGTTTTTTGct  
cgagctggcgaattcc  
>CD\_NM\_003841.2:462  
CgCctGcgagtctGGtatGCGTACAGTTTGTAATCAGATCTTCAAGAGAGATCTGATTTACAACTGTACATTTTTTTGct  
cgagctggcgaattcc  
>CD\_NM\_003841.2:604  
CgCctGcgagtctGGtatGCAGTCCAAGTCAGTAATTGTACTTCAAGAGAGTACAATTACTGACTTTGGACTTTTTTTGct  
cgagctggcgaattcc  
>CD\_NM\_003841.2:938  
CgCctGcgagtctGGtatGCGGGATCATAGTTCTAATTGTGTTCAAGAGACACAATTAGAACTATGATCCCTTTTTTTGct  
cgagctggcgaattcc  
>CD\_NM\_003841.2:610  
CgCctGcgagtctGGtatGCAGTCAAGTAAATGTACGTCCTGTTCAAGAGACAGGACGTACAATTACTGACTTTTTTTGct  
cgagctggcgaattcc  
>CD\_NM\_003841.2:499  
CgCctGcgagtctGGtatGACTGCACCATGACCAGAGACACTTCAAGAGAGTGTCTCTGGTCATGGTGCAGTTTTTTGct  
cgagctggcgaattcc  
>CD\_NM\_003841.2:923  
CgCctGcgagtctGGtatGATCATGCACCATCGTAGGGATCTTCAAGAGAGATCCCTACGATGGTGCATGAGTTTTTTGct  
cgagctggcgaattcc  
>CD\_NM\_003841.2:447  
CgCctGcgagtctGGtatGACTTCTTGCTTCCCATGTACAGTTCAAGAGACTGTACATGGGAAGCAAGAAGTTTTTTGct  
cgagctggcgaattcc  
>CD\_NM\_003840:497

CgCtGcgagtctGGtatGCGACACCGTGTGTCAGTGTGAATTCAAGAGATTCACACTGACACACGGTGTCTTTTTTGct  
cgagctggcgaattcc  
>CD\_NM\_003840:872  
CgCtGcgagtctGGtatGACGGCGTTCATGTCC TTCACGATTC AAGAGATCGTGAAGGACATGAACGCCGCTTTTTTGct  
cgagctggcgaattcc  
>CD\_NM\_003840:710  
CgCtGcgagtctGGtatGCGCCTCTCCCTATCACTACCTTTTTCAAGAGAAAGGTAGTGATAGGGAGAGGCATTTTTTGct  
cgagctggcgaattcc  
>CD\_NM\_003840:613  
CgCtGcgagtctGGtatGACCGGAGTGACATCAAGTGCAATTCAAGAGATTGCACTTGATGTCACTCCGGGTTTTTGct  
cgagctggcgaattcc  
>CD\_NM\_003840.3:1030  
CgCtGcgagtctGGtatGACCACAGCGTCTGCTGGAACAGTTCAAGAGACTGTTCCAGCAGACGCTGTGGCTTTTTTGct  
cgagctggcgaattcc  
>CD\_NM\_003840.3:872  
CgCtGcgagtctGGtatGAGGCGTTCATGTCC TTCACGAGTTCAAGAGACTCGTGAAGGACATGAACGCCGCTTTTTTGct  
cgagctggcgaattcc  
>CD\_NM\_003840.3:787  
CgCtGcgagtctGGtatGCCGGAAGAAATTCATTTCTTACTTCAAGAGAGTAAGAAATGAATTTCTTCCGATTTTTTGct  
cgagctggcgaattcc  
>CD\_NM\_003840.3:497  
CgCtGcgagtctGGtatGAACACCGTGTGTCAGTGTGAAATTCAAGAGATTTACACTGACACACGGTGTCTTTTTTGct  
cgagctggcgaattcc  
>CD\_NM\_003840.3:341  
CgCtGcgagtctGGtatGACAGCAGGATCTCATAGATCAGTTCAAGAGACTGATCTATGAGATCCTGCTGGTTTTTGct  
cgagctggcgaattcc  
>CD\_NM\_003840.3:760  
CgCtGcgagtctGGtatGCGCTGTGGTTGTGGTTGGCTTTTTCAAGAGAAAAGCCAACCACAACCACAGCTTTTTTGct  
cgagctggcgaattcc  
>CD\_NM\_003840.3:1049  
CgCtGcgagtctGGtatGAAGGCAGAAGCTGAAGGGTGTCTTCAAGAGAGACACCCTTCAGCTTCTGCCTGTTTTTGct  
cgagctggcgaattcc  
>CD\_NM\_003840.3:818  
CgCtGcgagtctGGtatGCTCTGCTCAGGTGGTGGAGGAGTTCAAGAGACTCCTCCACCACCTGAGCAGATTTTTTGct  
cgagctggcgaattcc  
>CD\_NM\_003840.3:447  
CgCtGcgagtctGGtatGAAGTTTGTAAATCAGGTCAAACCTTCAAGAGAGTTTGACCTGATTTACAACTGTTTTTGct  
cgagctggcgaattcc  
>CD\_NM\_003840.3:452  
CgCtGcgagtctGGtatGCGTAAATCAGGTCAAACAAATATTCAAGAGATATTTGTTTGACCTGATTTACATTTTTTGct  
cgagctggcgaattcc  
>CD\_NM\_003840.3:574  
CgCtGcgagtctGGtatGATGTCCCAGAGGGATGGTCAAGTTCAAGAGACTTGACCATCCCTCTGGGACACTTTTTTGct  
cgagctggcgaattcc  
>CD\_NM\_003840.3:953  
CgCtGcgagtctGGtatGCCCCAGGTCTCTGAGCAGGAAATTC AAGAGATTTCTGCTCAGAGACCTGGGTTTTTGct  
cgagctggcgaattcc  
>CD\_NM\_003840.3:959  
CgCtGcgagtctGGtatGATCTCTGAGCAGGAAATCCAAGTTCAAGAGACTTGATTTCTGCTCAGAGACTTTTTTGct  
cgagctggcgaattcc  
>CD\_NM\_003840.3:1028  
CgCtGcgagtctGGtatGAAGCCACAGCGTCTGCTGGAACCTTCAAGAGAGTTCCAGCAGACGCTGTGGCTTTTTTGct  
cgagctggcgaattcc  
>CD\_NM\_003840.3:158

CgCtGcgagtctGGtatGCGGACAGCGTCGGAACCAGACTTCAAGAGAGTCTGGTTCCCGACGCTGCCTTTTTTgct  
cgagctggcgaattcc  
>CD\_NM\_003840.3:710  
CgCtGcgagtctGGtatGACCTCTCCCTATCACTACCTTATTCAAGAGATAAGGTAGTGATAGGGAGAGGCTTTTTGct  
cgagctggcgaattcc  
>CD\_NM\_003840.3:712  
CgCtGcgagtctGGtatGATCTCCCTATCACTACCTTATCTTCAAGAGAGATAAGGTAGTGATAGGGAGAGTTTTGct  
cgagctggcgaattcc  
>CD\_NM\_003840.3:916  
CgCtGcgagtctGGtatGACGCAACGAGACCCTGAGTAACTTCAAGAGAGTACTCAGGGTCTCGTTGCGGTTTTGct  
cgagctggcgaattcc  
>CD\_NM\_003840.3:313  
CgCtGcgagtctGGtatGAAGGCGCAGCCTCAAGGAGGAGTTCAGAGACTCCTCCTTGAGGCTGCGCCTTTTTGct  
cgagctggcgaattcc  
>CD\_NM\_003840.3:199  
CgCtGcgagtctGGtatGAATCCTTAAGTTCGTCGTCTTCTTCAAGAGAGAAGACGACGAACTTAAGGATTTTTGct  
cgagctggcgaattcc  
>CD\_NM\_003840.3:437  
CgCtGcgagtctGGtatGATGCTATGTACAGTTTGTAATTTCAAGAGAATTTACAACTGTACATAGCAGTTTTGct  
cgagctggcgaattcc  
>CD\_NM\_003840.3:799  
CgCtGcgagtctGGtatGAATTTCTTACCTCAAAGGCATCTTCAAGAGAGATGCCTTTGAGGTAAGAAATTTTTGct  
cgagctggcgaattcc  
>CD\_NM\_003840.3:643  
CgCtGcgagtctGGtatGCGCTGCCAGTTCCTGCGAAATTTCAAGAGATTTCCAGTGGAAGTGGCAGCTTTTTGct  
cgagctggcgaattcc  
>CD\_NM\_003840.3:1098  
CgCtGcgagtctGGtatGCTGACGCTGACTCCGCTGACATTTCAAGAGAATGTCAGCGGAGTCAGCGTCATTTTTGct  
cgagctggcgaattcc  
>CD\_NM\_003840.3:792  
CgCtGcgagtctGGtatGCGAAATTCATTTCTTACCTCAATTTCAAGAGATTGAGGTAAGAAATGAATTTCTTTTTGct  
cgagctggcgaattcc  
>CD\_NM\_003840.3:402  
CgCtGcgagtctGGtatGCTTACACCATTGCTTCCAACAATTTCAAGAGATTGTTGGAAGCAATGGTGTAATTTTTGct  
cgagctggcgaattcc  
>CD\_NM\_003840.3:329  
CgCtGcgagtctGGtatGAAGGAGGAGTGTCAGCAGGATTTCAAGAGAATCCTGCTGGACACTCCTCCTTTTTGct  
cgagctggcgaattcc  
>CD\_NM\_003840.3:1152  
CgCtGcgagtctGGtatGCAGAAGGACATGCAAAGGAACTTCAAGAGAGTTTCTTTGCATGTCTTCTTTTTGct  
cgagctggcgaattcc  
>CD\_NM\_003840.3:588  
CgCtGcgagtctGGtatGCGGTCAAGGTCAGTAATTGTACTTCAAGAGAGTACAATTACTGACCTTGACCATTTTTGct  
cgagctggcgaattcc  
>CD\_NM\_003839.2:1124  
CgCtGcgagtctGGtatGATCACTGAGCCTGGAAGCAAATTTCAAGAGAATTTGCTTCCAGGCTCAGTGAGTTTTGct  
cgagctggcgaattcc  
>CD\_NM\_003839.2:477  
CgCtGcgagtctGGtatGCGGACACAGTGTGCAAACCTTGTTCAAGAGACAAGTTTTGCACACTGTGTCCTTTTTGct  
cgagctggcgaattcc  
>CD\_NM\_003839.2:1600  
CgCtGcgagtctGGtatGCTCTGAAAATGTGACTGGAACTTCAAGAGAGTTTCCAGTCACATTTCCAGATTTTTGct  
cgagctggcgaattcc  
>CD\_NM\_003839.2:162

CgCctGcgagtctGGtatGCTCTGGGACGGTGCTGTAACAATTCAAGAGATTGTTACAGCACCGTCCCAGATTTTTTgct  
cgagctggcgaattcc  
>CD\_NM\_003839.2:895  
CgCctGcgagtctGGtatGCCTGCTGACTCTGGAGGAGAAGTTCAAGAGACTTCTCCTCCAGAGTCAGCAGTTTTTgct  
cgagctggcgaattcc  
>CD\_NM\_003839.2:663  
CgCctGcgagtctGGtatGCTTACTTGCCCGGTTTAATAATTTCAAGAGAATTATTAACCGGGCAAGTAAATTTTTgct  
cgagctggcgaattcc  
>CD\_NM\_003839.2:193  
CgCctGcgagtctGGtatGCGGAAAGTACATGTCTTCTAAATTTCAAGAGATTTAGAAGACATGTACTTTCCTTTTTTgct  
cgagctggcgaattcc  
>CD\_NM\_003839.2:1666  
CgCctGcgagtctGGtatGAGGCGACATCATCGTGGTCTACTTCAAGAGAGTAGACCACGATGATGTCGCCCTTTTTgct  
cgagctggcgaattcc  
>CD\_NM\_003839.2:164  
CgCctGcgagtctGGtatGATGGGACGGTGCTGTAACAAATTTCAAGAGAATTTGTTACAGCACCGTCCCAGTTTTTgct  
cgagctggcgaattcc  
>CD\_NM\_003839.2:1008  
CgCctGcgagtctGGtatGACAGGATGCTCTCATTTGGTCAGTTCAAGAGACTGACCAATGAGAGCATCCTGGTTTTTgct  
cgagctggcgaattcc  
>CD\_NM\_003839.2:886  
CgCctGcgagtctGGtatGCGGTGCTTACTGCTGACTCTGTTCAAGAGACAGAGTCAGCAGTAAGACACCTTTTTTgct  
cgagctggcgaattcc  
>CD\_NM\_003839.2:1642  
CgCctGcgagtctGGtatGAAGCGGGCAGGTGATGAACTTCTTCAAGAGAGAAGTTCATCACCTGCCCGCTTTTTTgct  
cgagctggcgaattcc  
>CD\_NM\_003839.2:230  
CgCctGcgagtctGGtatGAACAGTGTATGTCCTGCCCTGTGTTCAAGAGACACAGGGCAGACATACTGTCTTTTTTgct  
cgagctggcgaattcc  
>CD\_NM\_003839.2:218  
CgCctGcgagtctGGtatGCCTACTACCTCTGACAGTGTATTTCAAGAGAATACACTGTCAGAGGTAGTAGTTTTTgct  
cgagctggcgaattcc  
>CD\_NM\_003839.2:1617  
CgCctGcgagtctGGtatGAAAACAGTAACTCCACGTTTCAATTTCAAGAGAATGAACGTGGAGTTACTGTTTCTTTTTTgct  
cgagctggcgaattcc  
>CD\_NM\_003839.2:1012  
CgCctGcgagtctGGtatGAATGCTCTCATTTGGTTCAGCAAGTTCAAGAGACTTGCTGACCAATGAGAGCATTTTTTgct  
cgagctggcgaattcc  
>CD\_NM\_003839.2:717  
CgCctGcgagtctGGtatGATGCCATCATCTTTGGCGTTTGTTCAGGACAAACGCCAAAGATGATGGCAGTTTTTgct  
cgagctggcgaattcc  
>CD\_NM\_003839.2:950  
CgCctGcgagtctGGtatGAGTGGTGTCTGTCAGGGCACATTTCAAGAGAATGTGCCCTGACAGACACCACCTTTTTTgct  
cgagctggcgaattcc  
>CD\_NM\_003839.2:1645  
CgCctGcgagtctGGtatGAGGGCAGGTGATGAACTTCAAGTTCAAGAGACTTGAAGTTCATCACCTGCCCGTTTTTgct  
cgagctggcgaattcc  
>CD\_NM\_003839.2:845  
CgCctGcgagtctGGtatGCGTACACACACGGCAAACTTTGTTCAGGACAAAGTTTGCCTGTGTGTACTTTTTTgct  
cgagctggcgaattcc  
>CD\_NM\_003839.2:560  
CgCctGcgagtctGGtatGCGTACCTTCCCTTGAAAGAGAGTTCAAGAGACTCTTTTCCAAGGAAGGTACATTTTTTgct  
cgagctggcgaattcc  
>CD\_NM\_003839.2:136

CgCtGcgagtctGGtatGCTGTACCAGTGAGAAGCATTATTTCAAGAGAATAATGCTTCTCACTGGTACATTTTTTGct  
cgagctggcgaattcc  
>CD\_NM\_003839.2:460  
CgCtGcgagtctGGtatGACCGTTGCAGCTCAACAAGGACTTCAAGAGAGTCTTGTGAGCTGCAACGGGTTTTTGct  
cgagctggcgaattcc  
>CD\_NM\_003839.2:1218  
CgCtGcgagtctGGtatGCGAGCACAGTGGGTTCAAGAAAGTTCAAGAGACTTCTGAACCCACTGTGCTTTTTTTGct  
cgagctggcgaattcc  
>CD\_NM\_003839.2:821  
CgCtGcgagtctGGtatGAAGTCTCAGGTGACAGTTGTGTTCAAGAGACACAACCTGTCACCTGAGGACTTTTTTTGct  
cgagctggcgaattcc  
>CD\_NM\_003839.2:1055  
CgCtGcgagtctGGtatGCTCAGACAGATGCCACAGAAGTTCAAGAGACTTCTGTGGGCATCTGTCTGAATTTTTTGct  
cgagctggcgaattcc  
>CD\_NM\_003839.2:204  
CgCtGcgagtctGGtatGCGTCTTCTAAATGCACTACTACTTCAAGAGAGTAGTAGTGCATTTAGAAGACATTTTTTGct  
cgagctggcgaattcc  
>CD\_NM\_003839.2:1014  
CgCtGcgagtctGGtatGCGTCTCATTTGGTCAAGACTTCAAGAGAGTCTTGCTGACCAATGAGAGCATTTTTTGct  
cgagctggcgaattcc  
>CD\_NM\_003839.2:1057  
CgCtGcgagtctGGtatGAAGACAGATGCCACAGAAGATTTCAAGAGAATCTTCTGTGGGCATCTGTCTTTTTTTGct  
cgagctggcgaattcc  
>CD\_NM\_003839.2:1145  
CgCtGcgagtctGGtatGCCACACCTCTTCTCTGAACCTTCAAGAGAGTTCAGAGAAAGGAGGTGGATTTTTTGct  
cgagctggcgaattcc  
>CD\_NM\_003839.2:901  
CgCtGcgagtctGGtatGAACTCTGGAGGAGAAGACATTTTTCAAGAGAAAATGTCTTCTCCTCCAGAGTCTTTTTTGct  
cgagctggcgaattcc  
>CD\_NM\_003839.2:583  
CgCtGcgagtctGGtatGCGAACATCATGGGACAGAGAAATTTCAAGAGATTTCTCTGTCCCATGATGTTCTTTTTTGct  
cgagctggcgaattcc  
>CD\_NM\_003839.2:882  
CgCtGcgagtctGGtatGATGAAGGTGTCTTACTGCTGACTTCAAGAGAGTCAAGAGAGTCAAGAGACTTCACTTTTTTGct  
cgagctggcgaattcc  
>CD\_NM\_016639.1:339  
CgCtGcgagtctGGtatGCGGAGACGATGCCGAGGAGAGTTCAAGAGACTCTCCTGCGGCATCGTCTCCATTTTTTGct  
cgagctggcgaattcc  
>CD\_NM\_016639.1:290  
CgCtGcgagtctGGtatGAGCTCTGAGCCTGACCTTCGTGTTCAAGAGACACGAAGGTCAAGGCTCAGAGCGTTTTTTGct  
cgagctggcgaattcc  
>CD\_NM\_016639.1:334  
CgCtGcgagtctGGtatGCGGTCTGGAGACGATGCCGAGTTCAAGAGACTGCGGCATCGTCTCCAGACCATTTTTTGct  
cgagctggcgaattcc  
>CD\_NM\_016639.1:404  
CgCtGcgagtctGGtatGACCAGCTGTGGCGCTGATCCAGTTCAAGAGACTGGATCAGCGCCACAGCTGGGTTTTTTGct  
cgagctggcgaattcc  
>CD\_NM\_016639.1:172  
CgCtGcgagtctGGtatGCCCTGGACAAGTGCATGGACTGTTCAAGAGACAGTCCATGCACTTGTCCAGGTTTTTTGct  
cgagctggcgaattcc  
>CD\_NM\_016639.1:337  
CgCtGcgagtctGGtatGCCTGGAGACGATGCCGAGGAGTTCAAGAGACTCCTGCGGCATCGTCTCCAGATTTTTTGct  
cgagctggcgaattcc  
>CD\_NM\_016639.1:181

CgCctGcgagtctGGtatGCGTGCATGGACTGCGCGTCTTGTTCAAGAGACAAGACGCGCAGTCCATGCACTTTTTTGct  
cgagctggcgaattcc  
>CD\_NM\_016639.1:62  
CgCctGcgagtctGGtatGATTGCTGCGGCTCCTCGTGTGTTCAAGAGACAGCACGAGGAGCCGAGCAACTTTTTTGct  
cgagctggcgaattcc  
>CD\_NM\_016639.1:407  
CgCctGcgagtctGGtatGCGTGTGGCGCTGATCCAGTGATTCAAGAGATCACTGGATCAGCGCCACAGCTTTTTTGct  
cgagctggcgaattcc  
>CD\_NM\_016639.1:410  
CgCctGcgagtctGGtatGCGTGGCGCTGATCCAGTGACAATTCAAGAGATTGTCCTGGATCAGCGCCACATTTTTTGct  
cgagctggcgaattcc  
>CD\_NM\_016639.1:167  
CgCctGcgagtctGGtatGAGCGGACCTGGACAAGTGCATGTTCAAGAGACATGCACTTGTCCAGGTCCGCGTTTTTGct  
cgagctggcgaattcc  
>CD\_NM\_016639.1:401  
CgCctGcgagtctGGtatGATGCCAGCTGTGGCGCTGATCTTCAAGAGAGATCAGCGCCACAGCTGGGCAGTTTTTGct  
cgagctggcgaattcc  
>CD\_NM\_016639.1:343  
CgCctGcgagtctGGtatGAACGATGCCGAGGAGAGAGAATTCAAGAGATTCTCTCTCTGCGGCATCGTCTTTTTTGct  
cgagctggcgaattcc  
>CD\_NM\_016639.1:212  
CgCctGcgagtctGGtatGCCCACAGCGACTTCTGCCTGTTCAAGAGACAGGCAGAAGTCGCTGTGCGGTTTTTTGct  
cgagctggcgaattcc  
>CD\_NM\_016639.1:341  
CgCctGcgagtctGGtatGAAGACGATGCCGAGGAGAGAGTTCAAGAGACTCTCTCTCTGCGGCATCGTCTTTTTTGct  
cgagctggcgaattcc  
>CD\_NM\_016639.1:161  
CgCctGcgagtctGGtatGATGGAGCGCGGACCTGGACAAGTTCAAGAGACTTGTCCAGGTCCGCGCTCCAGTTTTTGct  
cgagctggcgaattcc  
>CD\_NM\_016639.1:344  
CgCctGcgagtctGGtatGCCGATGCCGAGGAGAGAGAAGTTCAAGAGACTTCTCTCTCTGCGGCATCGTTTTTTGct  
cgagctggcgaattcc  
>CD\_NM\_016639.1:349  
CgCctGcgagtctGGtatGACCGCAGGAGAGAGAAGTTCAAGAGAGTGAACCTCTCTCTCTGCGGTTTTTTGct  
cgagctggcgaattcc  
>CD\_NM\_016639.1:287  
CgCctGcgagtctGGtatGAGGCGCTCTGAGCCTGACCTTCTTCAAGAGAGAAGGTCAGGCTCAGAGCGCCTTTTTGct  
cgagctggcgaattcc  
>CD\_NM\_016639.1:259  
CgCctGcgagtctGGtatGACTTCCGGCTGCTTTGGCCATTTCAAGAGAATGGGCCAAAGCAGCCGGAAGGTTTTTTGct  
cgagctggcgaattcc  
>CD\_NM\_016639.1:377  
CgCctGcgagtctGGtatGAATAGAGGAGACCGGCGGAGAGTTCAAGAGACTCTCCGCCGGTCTCTCTATGTTTTTGct  
cgagctggcgaattcc  
>CD\_NM\_016639.1:392  
CgCctGcgagtctGGtatGAGGAGAGGGCTGCCAGCTGTGTTCAAGAGACACAGCTGGGCAGCCCTCTCCGTTTTTTGct  
cgagctggcgaattcc  
>CD\_NM\_016639.1:214  
CgCctGcgagtctGGtatGAGCACAGCGACTTCTGCCTGGGTTCAAGAGACCCAGGCAGAAGTCGCTGTGCGTTTTTTGct  
cgagctggcgaattcc  
>CD\_NM\_016639.1:292  
CgCctGcgagtctGGtatGATCTGAGCCTGACCTTCGTGCTTTCAAGAGAAGCACGAAGGTCAGGCTCAGAGTTTTTTGct  
cgagctggcgaattcc  
>CD\_NM\_016639.1:264



CgCtGcgagtctGGtatGAGGCTGCTTTGGCCATCCTTGTTC AAGAGACAAGGATGGGCCAAAGCAGCCGTTTTTGct  
cgagctggcgaattcc  
>CD\_NM\_016639.1:85  
CgCtGcgagtctGGtatGAGCTCTGGCTGGCGTTGCTGCGTTCAAGAGACGCAGCAACGCCAGCCAGAGCCTTTTTTGct  
cgagctggcgaattcc  
>CD\_NM\_016639.1:164  
CgCtGcgagtctGGtatGAAGCGCGGACCTGGACAAGTGCTTCAAGAGAGCACTTGTCCAGGTCCGCGCTTTTTTGct  
cgagctggcgaattcc  
>CD\_NM\_016639.1:187  
CgCtGcgagtctGGtatGCGGACTGCGGCTTTCAGGGCTTCAAGAGAGCCCTGCAAGACGCGCAGTCCATTTTTTGct  
cgagctggcgaattcc  
>CD\_NM\_016639.1:346  
CgCtGcgagtctGGtatGAATGCCGCAGGAGAGAGAAGTTTTCAAGAGAACTTCTCTCCTGCGGCATTTTTTGct  
cgagctggcgaattcc  
>CD\_NM\_016639.1:92  
CgCtGcgagtctGGtatGACTGGCGTTGCTGCGCTCCGTGTTCAAGAGACACGGAGCGCAGCAACGCCAGCCTTTTTTGct  
cgagctggcgaattcc  
>CD\_NM\_016639.1:265  
CgCtGcgagtctGGtatGAGCTGCTTTGGCCATCCTTGTTC AAGAGACCAAGGATGGGCCAAAGCAGCCTTTTTTGct  
cgagctggcgaattcc  
>CD\_NM\_016639.1:223  
CgCtGcgagtctGGtatGCCTTCTGCC TGGGCTGCGCTGCTTCAAGAGAGCAGCGCAGCCAGGCAGAAGTTTTTTGct  
cgagctggcgaattcc  
>CD\_NM\_016639.1:59  
CgCtGcgagtctGGtatGACGGTTGCTGCGGCTCCTCGTGTTC AAGAGACACGAGGAGCCGAGCAACCGGTTTTTTGct  
cgagctggcgaattcc  
>CD\_NM\_012452:834  
CgCtGcgagtctGGtatGCCCCAGACAGTGGCCTTGGCATTTC AAGAGAATGCCAAGGCCACTGTCTGGGATTTTTTGct  
cgagctggcgaattcc  
>CD\_NM\_012452:551  
CgCtGcgagtctGGtatGATGGCGGTGGCCTGCTTCCTCATTC AAGAGATGAGGAAGCAGGCCACCGCCACTTTTTTGct  
cgagctggcgaattcc  
>CD\_NM\_012452:373  
CgCtGcgagtctGGtatGCCAGCGGAGTGGAGAAGTTGAATTC AAGAGATTCAACTTCTCCACTCCGCTGTTTTTTGct  
cgagctggcgaattcc  
>CD\_NM\_012452:305  
CgCtGcgagtctGGtatGCAGCAATGTGCATACTTCTGTGTTC AAGAGACACAGAAGTATGCACATTGCTTTTTTTGct  
cgagctggcgaattcc  
>CD\_NM\_012452:367  
CgCtGcgagtctGGtatGAAGGAGACAGCGGAGTGGAGAATTCAAGAGATTCTCCACTCCGCTGTCTCCTGTTTTTTGct  
cgagctggcgaattcc  
>CD\_NM\_012452:658  
CgCtGcgagtctGGtatGCGCCGGCAGCCCTGTGAGCACATTCAAGAGATGTGCTCACAGGGCTGCCGGCTTTTTTTGct  
cgagctggcgaattcc  
>CD\_NM\_012452.2:431  
CgCtGcgagtctGGtatGCGCACAGAGGCTCAGAAGCAAGTTCAAGAGACTTGCTTCTGAGCCTCTGTGCTTTTTTTGct  
cgagctggcgaattcc  
>CD\_NM\_012452.2:834  
CgCtGcgagtctGGtatGACCAGACAGTGGCCTTGGCATTTC AAGAGAAATGCCAAGGCCACTGTCTGGGTTTTTTGct  
cgagctggcgaattcc  
>CD\_NM\_012452.2:342  
CgCtGcgagtctGGtatGACCAGTGAACCTTCCACCAGAGTTCAAGAGACTCTGGTGGAAGGTTCACTGGGTTTTTTGct  
cgagctggcgaattcc  
>CD\_NM\_012452.2:551

CgCctGcgagtctGGtatGCGGCGGTGGCCTGCTTCCCTCAATTCAAGAGATTGAGGAAGCAGGCCACCGCCATTTTTTGct  
cgagctggcgaattcc  
>CD\_NM\_012452.2:246  
CgCctGcgagtctGGtatGATATGACCATCTCCTGAGGGACTTCAAGAGAGTCCCTCAGGAGATGGTCATAGTTTTTGct  
cgagctggcgaattcc  
>CD\_NM\_012452.2:852  
CgCctGcgagtctGGtatGAATTGTGTGTGTGCCTGCCAGTTCAAGAGACTGGGCAGGCACACACACAATTTTTTGct  
cgagctggcgaattcc  
>CD\_NM\_012452.2:399  
CgCctGcgagtctGGtatGCTCAGACAACCTCGGGAAGGTACTTCAAGAGAGTACCTTCCCGAGTTGTCTGAATTTTTTGct  
cgagctggcgaattcc  
>CD\_NM\_012452.2:222  
CgCctGcgagtctGGtatGATGCCGCAAGGAGCAAGGCAAGTTCAAGAGACTTGCCTTGCTCCTTGCGGCAGTTTTTGct  
cgagctggcgaattcc  
>CD\_NM\_012452.2:555  
CgCctGcgagtctGGtatGAGTGGCCTGCTTCCCTCAAGAAGTTCAAGAGACTTCTTGAGGAAGCAGGCCACTTTTTGct  
cgagctggcgaattcc  
>CD\_NM\_012452.2:140  
CgCctGcgagtctGGtatGCGCTGGGTACCTGCATGTCTGTTCAAGAGACAGGACATGCAGGTACCCAGCATTTTTTGct  
cgagctggcgaattcc  
>CD\_NM\_012452.2:257  
CgCctGcgagtctGGtatGCCCTGAGGGACTGCATCAGCTGTTCAAGAGACAGCTGATGCAGTCCCTCAGGATTTTTTGct  
cgagctggcgaattcc  
>CD\_NM\_012452.2:289  
CgCctGcgagtctGGtatGCGTGGACAGCACCCTAAGCAATTTCAAGAGAATTGCTTAGGGTGCTGTCCACATTTTTTGct  
cgagctggcgaattcc  
>CD\_NM\_012452.2:557  
CgCctGcgagtctGGtatGCGGCCTGCTTCCCTCAAGAAGAGTTCAAGAGACTTCTTCTTGAGGAAGCAGGCCATTTTTTGct  
cgagctggcgaattcc  
>CD\_NM\_012452.2:433  
CgCctGcgagtctGGtatGAACAGAGGCTCAGAAGCAAGTCTTCAAGAGAGACTTGCTTCTGAGCCTCTGTGTTTTTGct  
cgagctggcgaattcc  
>CD\_NM\_012452.2:354  
CgCctGcgagtctGGtatGCCACCAGAGCTCAGGAGACAGTTCAAGAGACTGTCTCCTGAGCTCTGGTGGATTTTTTGct  
cgagctggcgaattcc  
>CD\_NM\_012452.2:627  
CgCctGcgagtctGGtatGAGCCAAGTCTTCCAGGATCACTTCAAGAGAGTGATCCTGGGAAGACTTGGCCTTTTTTGct  
cgagctggcgaattcc  
>CD\_NM\_012452.2:263  
CgCctGcgagtctGGtatGAGGACTGCATCAGCTGTGCCTCTTCAAGAGAGAGGCACAGCTGATGCAGTCCCTTTTTTGct  
cgagctggcgaattcc  
>CD\_NM\_012452.2:276  
CgCctGcgagtctGGtatGATGTGCCTCCATCTGTGGACAGTTCAAGAGACTGTCCACAGATGGAGGCACAGTTTTTGct  
cgagctggcgaattcc  
>CD\_NM\_012452.2:309  
CgCctGcgagtctGGtatGCTGTGCATACTTCTGTGAGAACTTCAAGAGAGTTCTCACAGAAGTATGCACATTTTTTGct  
cgagctggcgaattcc  
>CD\_NM\_012452.2:636  
CgCctGcgagtctGGtatGCTCCAGGATCACGCGATGGAATTTCAAGAGATTCCATCGCGTGATCCTGGGAATTTTTTGct  
cgagctggcgaattcc  
>CD\_NM\_012452.2:488  
CgCctGcgagtctGGtatGCGGTGGCCCTGGTCTACAGCACTTCAAGAGAGTGCTGTAGACCAGGGCCACCTTTTTTGct  
cgagctggcgaattcc  
>CD\_NM\_012452.2:617

CgCctGcgagtctGGtatGATCAAAGTCCGGCCAAGTCTTCTTCAAGAGAGAAGACTTGGCCGGACTTTGACTTTTTTGct  
cgagctggcgaattcc  
>CD\_NM\_012452.2:340  
CgCctGcgagtctGGtatGCGCCCAGTGAACCTTCCACCAGTTCAAGAGACTGGTGGAAAGGTTCACTGGGCTTTTTTGct  
cgagctggcgaattcc  
>CD\_NM\_012452.2:480  
CgCctGcgagtctGGtatGCGCAGATCAGGTGGCCCTGGTCTTCAAGAGAGACCAGGGCCACCTGATCTGCATTTTTTGct  
cgagctggcgaattcc  
>CD\_NM\_012452.2:367  
CgCctGcgagtctGGtatGCGGAGACAGCGGAGTGGAGAAGTTCAAGAGACTTCTCCACTCCGCTGTCTCCTTTTTTGct  
cgagctggcgaattcc  
>CD\_NM\_012452.2:418  
CgCctGcgagtctGGtatGCACCAAGGATTGGAGCACAGAGTTCAAGAGACTCTGTGCTCCAATCCTTGGTATTTTTGct  
cgagctggcgaattcc  
>CD\_NM\_012452.2:200  
CgCctGcgagtctGGtatGAAGCCTTCTGCAGGTCACTCAGTTCAAGAGACTGAGTGACCTGCAGAAGGCTGTTTTTGct  
cgagctggcgaattcc  
>CD\_NM\_052945:536  
CgCctGcgagtctGGtatGAACGGCCGGCCCTGAGCAACAATTTCAAGAGATTGTTGCTCAGGGCCGGCCGTTTTTTGct  
cgagctggcgaattcc  
>CD\_NM\_052945:537  
CgCctGcgagtctGGtatGCCGGCCGGCCCTGAGCAACAATTTCAAGAGAATTGTTGCTCAGGGCCGGCCGTTTTTTGct  
cgagctggcgaattcc  
>CD\_NM\_052945:114  
CgCctGcgagtctGGtatGATCCTGCGCACGCCGCGGCCGATTCAAGAGATCGGCCGCGGCGTGCGCAGGAGTTTTTGct  
cgagctggcgaattcc  
>CD\_NM\_052945.2:407  
CgCctGcgagtctGGtatGACGGGAATCTCTGATGCCACAGTTCAAGAGACTGTGGCATCAGAGATTCCCGGTTTTTGct  
cgagctggcgaattcc  
>CD\_NM\_052945.2:405  
CgCctGcgagtctGGtatGATCCGGGAATCTCTGATGCCACTTCAAGAGAGTGGCATCAGAGATTCCCGGAGTTTTTGct  
cgagctggcgaattcc  
>CD\_NM\_052945.2:382  
CgCctGcgagtctGGtatGACTGGACAAGGTCATCATTCTGTTCAAGAGACAGAATGATGACCTTGTCAGGTTTTTGct  
cgagctggcgaattcc  
>CD\_NM\_052945.2:538  
CgCctGcgagtctGGtatGAGCCGGCCCTGAGCAACAATAGTTCAAGAGACTATTGTTGCTCAGGGCCGGCCTTTTTTGct  
cgagctggcgaattcc  
>CD\_NM\_052945.2:393  
CgCctGcgagtctGGtatGCCATCATTCTGTCTCCGGGAATTTCAAGAGAATTCCCGGAGACAGAATGATGATTTTTTGct  
cgagctggcgaattcc  
>CD\_NM\_052945.2:536  
CgCctGcgagtctGGtatGCCGGCCGGCCCTGAGCAACAATTTCAAGAGAATTGTTGCTCAGGGCCGGCCGTTTTTTGct  
cgagctggcgaattcc  
>CD\_NM\_052945.2:514  
CgCctGcgagtctGGtatGAACTGAACTGGTGACCACCAAGTTCAAGAGACTTGGTGGTCACCAGTTCAGTGTTTTTGct  
cgagctggcgaattcc  
>CD\_NM\_052945.2:277  
CgCctGcgagtctGGtatGAGCGCTGGTCTGGTGGGTCTGTTCAAGAGACAGACCCACCAGGACCAGCGCCTTTTTTGct  
cgagctggcgaattcc  
>CD\_NM\_052945.2:282  
CgCctGcgagtctGGtatGCGGTCTGGTGGGTCTGGTGAGTTCAAGAGACTCACCAGACCCACCAGGACCATTTTTTGct  
cgagctggcgaattcc  
>CD\_NM\_052945.2:76

CgCtGcgagtctGGtatGATTCGACCTGCTGGTCCGCCACTTCAAGAGAGTGGCGGACCAGCAGGTCGAAGTTTTTGct  
cgagctggcgaattcc  
>CD\_NM\_052945.2:67  
CgCtGcgagtctGGtatGAGCCGAGTGCTTCGACCTGCTGTTCAAGAGACAGCAGGTCGAAGCACTCGGCCTTTTTTGct  
cgagctggcgaattcc  
>CD\_NM\_052945.2:422  
CgCtGcgagtctGGtatGACCACAGCTCCTGCCTGGCCTCTTCAAGAGAGAGGCCAGGCAGGAGCTGTGGCTTTTTTGct  
cgagctggcgaattcc  
>CD\_NM\_052945.2:516  
CgCtGcgagtctGGtatGATGAACTGGTGACCACCAAGACTTCAAGAGAGTCTTGGTGGTCACCAGTTCAGTTTTTGct  
cgagctggcgaattcc  
>CD\_NM\_052945.2:271  
CgCtGcgagtctGGtatGAGTCTGGCGCTGGTCCTGGTGTTCAGAGACACCAGGACCAGCGCCAGGACCTTTTTTGct  
cgagctggcgaattcc  
>CD\_NM\_052945.2:499  
CgCtGcgagtctGGtatGAACAGAGCTGGGCTCCACTGAATTCAAGAGATTCAGTGGAGCCCAGCTCTGTGTTTTTGct  
cgagctggcgaattcc  
>CD\_NM\_052945.2:288  
CgCtGcgagtctGGtatGCGGTGGGCTGGTGAGCTGGAGTTCAGAGACTCCAGCTCACCAGACCCACCATTTTTTGct  
cgagctggcgaattcc  
>CD\_NM\_052945.2:265  
CgCtGcgagtctGGtatGAGCACTGGTCCCTGGCGCTGGTCTTCAAGAGAGACCAGCGCCAGGACCAGTGCCTTTTTTGct  
cgagctggcgaattcc  
>CD\_NM\_052945.2:428  
CgCtGcgagtctGGtatGACTCCTGGCCTCCTCCTGTTCAAGAGACAGGAGGAGGCCAGGCAGGAGCTTTTTTGct  
cgagctggcgaattcc  
>CD\_NM\_052945.2:395  
CgCtGcgagtctGGtatGCTCATTCTGTCTCCGGGAATCTTTCAAGAGAAGATCCCGGAGACAGAATGATTTTTTGct  
cgagctggcgaattcc  
>CD\_NM\_052945.2:487  
CgCtGcgagtctGGtatGACCTGTGCCAGCCACAGAGCTGTTCAAGAGACAGCTCTGTGGCTGGCACAGGGTTTTTGct  
cgagctggcgaattcc  
>CD\_NM\_052945.2:481  
CgCtGcgagtctGGtatGAAGTGTCCCTGTGCCAGCCACATTCAGAGATGTGGCTGGCACAGGGACACTGTTTTTGct  
cgagctggcgaattcc  
>CD\_NM\_052945.2:497  
CgCtGcgagtctGGtatGACCACAGAGCTGGGCTCCACTGTTCAAGAGACAGTGGAGCCCAGCTCTGTGGCTTTTTTGct  
cgagctggcgaattcc  
>CD\_NM\_052945.2:501  
CgCtGcgagtctGGtatGAAGAGCTGGGCTCCACTGAACTTTCAAGAGAAGTTCAGTGGAGCCCAGCTCTGTTTTTGct  
cgagctggcgaattcc  
>CD\_NM\_052945.2:384  
CgCtGcgagtctGGtatGCGGACAAGGTCATCATTCTGTCTTCAAGAGAGACAGAATGATGACCTTGTCATTTTTTGct  
cgagctggcgaattcc  
>CD\_NM\_052945.2:253  
CgCtGcgagtctGGtatGACTGCTGGGCTGGCACTGGTCTTCAAGAGAGACCAGTGCCAGGCCAGCAGCTTTTTTGct  
cgagctggcgaattcc  
>CD\_NM\_052945.2:286  
CgCtGcgagtctGGtatGACTGGTGGGCTGGTGAGCTGGTTCAGAGACCAGCTCACCAGACCCACCAGTTTTTGct  
cgagctggcgaattcc  
>CD\_NM\_052945.2:475  
CgCtGcgagtctGGtatGCGGCCACAGTGTCCCTGTGCCATTCAAGAGATGGCACAGGGACACTGTGGCCATTTTTTGct  
cgagctggcgaattcc  
>CD\_NM\_052945.2:495

CgCctGcgagtctGGtatGAAGCCACAGAGCTGGGCTCCACTTCAAGAGAGTGGAGCCCAGCTCTGTGGCTGTTTTTGct  
cgagctggcgaattcc  
>CD\_NM\_052945.2:541  
CgCctGcgagtctGGtatGAGGCCCTGAGCAACAATAGCAGTTCAAGAGACTGCTATTGTTGCTCAGGGCCGTTTTTGct  
cgagctggcgaattcc  
>CD\_NM\_052945.2:511  
CgCctGcgagtctGGtatGATCCACTGAACTGGTGACCACCTTCAAGAGAGGTGGTCACCAGTTCAGTGGAGTTTTTGct  
cgagctggcgaattcc  
>CD\_NM\_001192:389  
CgCctGcgagtctGGtatGAACCTGTTTGGGACTGAGCTTATTCAAGAGATAAGCTCAGTCCCAAACAGGTCTTTTTTGct  
cgagctggcgaattcc  
>CD\_NM\_001192:449  
CgCctGcgagtctGGtatGCAGGAAGATAAACTCTGAACCATTCAAGAGATGGTTCAGAGTTTATCTTCCTTTTTTTGct  
cgagctggcgaattcc  
>CD\_NM\_001192:466  
CgCctGcgagtctGGtatGCACCATTAAAGGACGAGTTTAATTCAAGAGATTAACTCGTCCTTTAATGGTTTTTTTGct  
cgagctggcgaattcc  
>CD\_NM\_001192:536  
CgCctGcgagtctGGtatGAAGCAGGACTGGTGATGAAATTTTCAAGAGAAATTCATCACCAGTCCTGCTTTTTTGct  
cgagctggcgaattcc  
>CD\_NM\_001192.2:452  
CgCctGcgagtctGGtatGCAGATAAACTCTGAACCATTAAATTCAAGAGATTAATGGTTCAGAGTTTATCTTTTTTTTGct  
cgagctggcgaattcc  
>CD\_NM\_001192.2:393  
CgCctGcgagtctGGtatGATTTGGGACTGAGCTTAATAATTTCAAGAGAATTATTAAGCTCAGTCCCAAACTTTTTGct  
cgagctggcgaattcc  
>CD\_NM\_001192.2:375  
CgCctGcgagtctGGtatGCTGCGATTCTCTGGACCTGTTTTTCAAGAGAAAACAGGTCCAGAGAATCGCATTTTTTGct  
cgagctggcgaattcc  
>CD\_NM\_001192.2:752  
CgCctGcgagtctGGtatGCAATCAATTTCTGCTAGGTAATTTCAAGAGAATTACCTAGCAGAAATTGATTTTTTTTGct  
cgagctggcgaattcc  
>CD\_NM\_001192.2:733  
CgCctGcgagtctGGtatGAAGTGCTACGGAGATAGAGAAATTTCAAGAGATTTCTCTATCTCCGTAGCACTTTTTTGct  
cgagctggcgaattcc  
>CD\_NM\_001192.2:327  
CgCctGcgagtctGGtatGATCAGCGTTATTGTAATGCAAGTTCAAGAGACTTGCATTACAATAACGCTGACTTTTTTGct  
cgagctggcgaattcc  
>CD\_NM\_001192.2:536A  
CgCctGcgagtctGGtatGCGGACTGGTGATGAAATTATTCTTCAAGAGAGAATAATTTTCATCACCAGTCCTTTTTTGct  
cgagctggcgaattcc  
>CD\_NM\_001192.2:499  
CgCctGcgagtctGGtatGCGGTCTCCTGGGCATGGCTAACTTCAAGAGAGTTAGCCATGCCAGGAGACCTTTTTTGct  
cgagctggcgaattcc  
>CD\_NM\_001192.2:676  
CgCctGcgagtctGGtatGCACCATTCTTGTCACCACGAAATTTCAAGAGATTTCTGTTGACAAGAATGGTTTTTTTGct  
cgagctggcgaattcc  
>CD\_NM\_001192.2:278  
CgCctGcgagtctGGtatGCGCATACTTGTCAACTTCGATTTCAAGAGAAATCGAAGTTGACAAGGTATGCATTTTTTGct  
cgagctggcgaattcc  
>CD\_NM\_001192.2:288  
CgCctGcgagtctGGtatGATCAACTTCGATGTTCTTCTAATTTCAAGAGATTAGAAGAACATCGAAGTTGACTTTTTTGct  
cgagctggcgaattcc  
>CD\_NM\_001192.2:263

CgCctGcgagtctGGtatGCGTTTGTTCATGCTTGCATACTTCAAGAGAGTATGCAAGCATGCAACAACTTTTTTGct  
cgagctggcgaattcc  
>CD\_NM\_001192.2:293  
CgCctGcgagtctGGtatGATTCGATGTTCTTCTAATACTCTTCAAGAGAGTATTAGAAGAACATCGAAGTTTTTGct  
cgagctggcgaattcc  
>CD\_NM\_001192.2:291  
CgCctGcgagtctGGtatGCACTTCGATGTTCTTCTAATACTTCAAGAGAGTATTAGAAGAACATCGAAGTTTTTGct  
cgagctggcgaattcc  
>CD\_NM\_001192.2:533  
CgCctGcgagtctGGtatGCAGAGCAGGACTGGTGATGAAATTCAAGAGATTCATCACCAGTCCTGCTCTTTTTTGct  
cgagctggcgaattcc  
>CD\_NM\_001192.2:389  
CgCctGcgagtctGGtatGCCCTGTTTGGGACTGAGCTTAATTCAAGAGATTAAGCTCAGTCCCAAACAGGTTTTTGct  
cgagctggcgaattcc  
>CD\_NM\_001192.2:302  
CgCctGcgagtctGGtatGCCTTCTAATACTCCTCCTCTAATTCAAGAGATTAGAGGAGGAGTATTAGAAGTTTTTGct  
cgagctggcgaattcc  
>CD\_NM\_001192.2:739  
CgCctGcgagtctGGtatGCACGGAGATAGAGAAATCAATTTTCAAGAGAAATTGATTTCTCTATCTCCGTATTTTTGct  
cgagctggcgaattcc  
>CD\_NM\_001192.2:329  
CgCctGcgagtctGGtatGAAGCGTTATTGTAATGCAAGTGTTCAAGAGACACTTGCATTACAATAACGCTGTTTTGct  
cgagctggcgaattcc  
>CD\_NM\_001192.2:607  
CgCctGcgagtctGGtatGATGCATCAAGAGCAAACCGAAGTTCAAGAGACTTCGGTTTGCTCTTGATGCAGTTTTTGct  
cgagctggcgaattcc  
>CD\_NM\_001192.2:601  
CgCctGcgagtctGGtatGCGAAGACTGCATCAAGAGCAAATTCAGAGATTTGCTCTTGATGCAGTCTTCATTTTTGct  
cgagctggcgaattcc  
>CD\_NM\_001192.2:258  
CgCctGcgagtctGGtatGCTGACAGTTTGTTCATGCTTGTTCAGAGACAAGCATGCAACAACTGTCAATTTTTGct  
cgagctggcgaattcc  
>CD\_NM\_001192.2:323  
CgCctGcgagtctGGtatGCCATGTCAGCGTTATTGTAATGTTCAAGAGACATTACAATAACGCTGACATGTTTTTGct  
cgagctggcgaattcc  
>CD\_NM\_001192.2:536B  
CgCctGcgagtctGGtatGCGCAGGACTGGTGATGAAATTATTCAAGAGATAATTCATCACCAGTCCTGCTTTTTTGct  
cgagctggcgaattcc  
>CD\_NM\_001192.2:310  
CgCctGcgagtctGGtatGCACTCCTCCTCTAACATGTCAGTTCAAGAGACTGACATGTTAGAGGAGGAGTATTTTTGct  
cgagctggcgaattcc  
>CD\_NM\_001192.2:634  
CgCctGcgagtctGGtatGATCTGACCATTGCTTTCCACTCTTCAAGAGAGAGTGGAAAGCAATGGTCAGAGTTTTTGct  
cgagctggcgaattcc  
>CD\_NM\_001192.2:396  
CgCctGcgagtctGGtatGCGGGACTGAGCTTAATAATTTCTTCAAGAGAGAAATTATTAAGCTCAGTCCATTTTTGct  
cgagctggcgaattcc  
>CD\_NM\_001192.2:284  
CgCctGcgagtctGGtatGACTTGCAACTTCGATGTTCTTTTTCAAGAGAAAGAACATCGAAGTTGACAAGTTTTTGct  
cgagctggcgaattcc  
>CD\_NM\_001192.2:450  
CgCctGcgagtctGGtatGAGAAGATAAACTCTGAACCATTTTCAAGAGAAATGGTTCAGAGTTTATCTTCCTTTTTGct  
cgagctggcgaattcc  
>CD\_NM\_002507:1141

CgCctGcgagtctGGtatGCGCGGGAGGAGGTGGAGAAGCTTTCAAGAGAAGCTTCTCCACCTCCTCCGCTTTTTTgct  
cgagctggcgaattcc  
>CD\_NM\_002507.1:853  
CgCctGcgagtctGGtatGAACCGACAACCTCATCCCTGTCTTCAAGAGAGACAGGGATGAGGTTGTCGGTGTTTTTGct  
cgagctggcgaattcc  
>CD\_NM\_002507.1:1353  
CgCctGcgagtctGGtatGCGGAGAGTCTGTGCAGTGAGTCTTCAAGAGAGACTCACTGCACAGACTCTCATTTTTTGct  
cgagctggcgaattcc  
>CD\_NM\_002507.1:1042  
CgCctGcgagtctGGtatGAAGCCAGAGCCTGCATGACCAGTTCAAGAGACTGGTCATGCAGGCTCTGGCTGTTTTTGct  
cgagctggcgaattcc  
>CD\_NM\_002507.1:1087  
CgCctGcgagtctGGtatGAGGCCAGGCCCTCAAGGGTGACTTCAAGAGAGTACCCTTGAGGGCCTGGCCTTTTTgct  
cgagctggcgaattcc  
>CD\_NM\_002507.1:1351  
CgCctGcgagtctGGtatGAGTGGAGAGTCTGTGCAGTGAGTTCAAGAGACTCACTGCACAGACTCTCCAGTTTTTgct  
cgagctggcgaattcc  
>CD\_NM\_002507.1:609  
CgCctGcgagtctGGtatGACTGCACCGTGTGCGAGGACACTTCAAGAGAGTGTCTCGCACACGGTGCAGTTTTTgct  
cgagctggcgaattcc  
>CD\_NM\_002507.1:752  
CgCctGcgagtctGGtatGAAGCCTGAGGCACCTCCAGAACTTCAAGAGAGTTCTGGAGGTGCCTCAGGCTTTTTTgct  
cgagctggcgaattcc  
>CD\_NM\_002507.1:513  
CgCctGcgagtctGGtatGCCGTGTTCTCCTGCCAGGACAATTCAAGAGATTGTCTCGCAGGAGAACACGATTTTTTgct  
cgagctggcgaattcc  
>CD\_NM\_002507.1:663  
CgCctGcgagtctGGtatGACGACGCCGAGTGCAGGAGATTTCAAGAGAATCTCCTCGCACTCGGCGTCGGTTTTTgct  
cgagctggcgaattcc  
>CD\_NM\_002507.1:921  
CgCctGcgagtctGGtatGCAGCCTTCAAGAGGTGGAACAGTTCAAGAGACTGTTCCACCTCTTGAAGGCTATTTTTGct  
cgagctggcgaattcc  
>CD\_NM\_002507.1:881  
CgCctGcgagtctGGtatGCCATCCTGGCTGCTGTGGTTGTTCAAGAGACAACCACAGCAGCCAGGATGGATTTTTGct  
cgagctggcgaattcc  
>CD\_NM\_002507.1:912  
CgCctGcgagtctGGtatGCGGCCTACATAGCCTTCAAGAGTTCAAGAGACTCTTGAAGGCTATGTAGGCCATTTTTGct  
cgagctggcgaattcc  
>CD\_NM\_002507.1:933  
CgCctGcgagtctGGtatGAGTGGAACAGCTGCAAGCAGAATTCAAGAGATTCTGCTTGCAGCTGTCCACTTTTTgct  
cgagctggcgaattcc  
>CD\_NM\_002507.1:1362  
CgCctGcgagtctGGtatGCGTGCAGTGAGTCCACTGCCACTTCAAGAGAGTGGCAGTGGACTCACTGCACATTTTTGct  
cgagctggcgaattcc  
>CD\_NM\_002507.1:898  
CgCctGcgagtctGGtatGAGTTGTGGGCCTTGTGGCCTACTTCAAGAGAGTAGGCCACAAGGCCACAACTTTTTgct  
cgagctggcgaattcc  
>CD\_NM\_002507.1:291  
CgCctGcgagtctGGtatGCCAGACCGTGTGTGAGCCCTGTTCAAGAGACAGGGCTCACACACGGTCTGGTTTTTgct  
cgagctggcgaattcc  
>CD\_NM\_002507.1:1364  
CgCctGcgagtctGGtatGCGCAGTGAGTCCACTGCCACATTTCAAGAGAATGTGGCAGTGGACTCACTGCATTTTTGct  
cgagctggcgaattcc  
>CD\_NM\_002507.1:1018

CgCctGcgagtctGGtatGAAGCGACAGTGGCATCTCCGTGTTCAAGAGACACGGAGATGCCACTGTCGCTGTTTTTGct  
cgagctggcgaattcc  
>CD\_NM\_002507.1:915  
CgCctGcgagtctGGtatGACTACATAGCCTTCAAGAGGTGTTCAAGAGACACCTCTTGAAGGCTATGTAGTTTTTGct  
cgagctggcgaattcc  
>CD\_NM\_002507.1:964  
CgCctGcgagtctGGtatGCGCCAACAGCCGGCCAGTGAACCTTCAAGAGAGTTCCTGCGCCGCTGTTGGCTTTTTTGct  
cgagctggcgaattcc  
>CD\_NM\_002507.1:1226  
CgCctGcgagtctGGtatGAACATAGACTCCTTTACCCATGTTCAAGAGACATGGGTAAAGGAGTCTATGTGTTTTTGct  
cgagctggcgaattcc  
>CD\_NM\_002507.1:387  
CgCctGcgagtctGGtatGCCAGAGCATGTCGGCGCCGTGTTCAAGAGACACGGCGCCGACATGCTCTGGATTTTTGct  
cgagctggcgaattcc  
>CD\_NM\_002507.1:683  
CgCctGcgagtctGGtatGCTCCCTGGCCGTTGGATTACACTTCAAGAGAGTGTAAATCCAACGGCCAGGGATTTTTTGct  
cgagctggcgaattcc  
>CD\_NM\_002507.1:1342  
CgCctGcgagtctGGtatGCGCCGACCTCGTGGAGAGTCTGTTCAAGAGACAGACTCTCCACGAGGTCGCTTTTTTGct  
cgagctggcgaattcc  
>CD\_NM\_002507.1:755  
CgCctGcgagtctGGtatGACTGAGGCACCTCCAGAACAAGTTCAAGAGACTTGTCTGGAGGTGCCTCAGTTTTTGct  
cgagctggcgaattcc  
>CD\_NM\_002507.1:892  
CgCctGcgagtctGGtatGCGCTGTGGTTGTGGGCCTTGTGTTCAAGAGACACAAGGCCACAACCACAGCATTTTTTGct  
cgagctggcgaattcc  
>CD\_NM\_002507.1:743  
CgCctGcgagtctGGtatGCGCACCCAGGAGCCTGAGGCACTTCAAGAGAGTGCCTCAGGCTCCTGGGTGCTTTTTTGct  
cgagctggcgaattcc  
>CD\_NM\_002507.1:1027  
CgCctGcgagtctGGtatGCGGCATCTCCGTGGACAGCCAGTTCAAGAGACTGGCTGTCCACGGAGATGCCATTTTTGct  
cgagctggcgaattcc  
>CD\_NM\_002507.1:1141  
CgCctGcgagtctGGtatGACGGGAGGAGGTGGAGAAGCTTTTCAAGAGAAAGCTTCTCCACCTCCTCCCGTTTTTGct  
cgagctggcgaattcc  
>CD\_NM\_002507.1:1104  
CgCctGcgagtctGGtatGATGACGGAGGCCTCTACAGCAGTTCAAGAGACTGCTGTAGAGGCCTCCGTCATTTTTGct  
cgagctggcgaattcc  
>CD\_NM\_002507.1:764  
CgCctGcgagtctGGtatGACTCCAGAACAAGACCTCATAGTTCAAGAGACTATGAGGTCTTGTCTGGAGTTTTTGct  
cgagctggcgaattcc  
>CD\_NM\_002507.1:151  
CgCctGcgagtctGGtatGACGCCTGCTGCTGTTGCTGCTTTTTCAAGAGAAAGCAGCAACAGCAGCAGGCGTTTTTGct  
cgagctggcgaattcc  
>CD\_XM\_098133:879  
CgCctGcgagtctGGtatGACAGGAAGGGTCTGAAGTTTATTTCAAGAGAATAAACTTCAGACCCTCCTGCTTTTTGct  
cgagctggcgaattcc  
>CD\_XM\_098133:884  
CgCctGcgagtctGGtatGCAGGGTCTGAAGTTTATTCTAATTCAAGAGATTAGAATAAACTTCAGACCCTTTTTTGct  
cgagctggcgaattcc  
>CD\_NM\_181780.2:557  
CgCctGcgagtctGGtatGCACTCTTTATGTGACAGATGTATTCAAGAGATACATCTGTACATAAAGAGTTTTTTGct  
cgagctggcgaattcc  
>CD\_NM\_181780.2:1005



CgCctGcgagtctGGtatGACAACAGAATATGCATCCATATTTCAAGAGAATATGGATGCATATTCTGTTGGTTTTTgct  
cgagctggcgaattcc  
>CD\_NM\_181780.2:885  
CgCctGcgagtctGGtatGAGGTCTGAAGTTTATTCTAATCTTCAAGAGAGATTAGAATAAACTTCAGACCCTTTTTGct  
cgagctggcgaattcc  
>CD\_NM\_181780.2:373  
CgCctGcgagtctGGtatGCTGTGACTTGGTGCAAGCTCAATTCAAGAGATTGAGCTTGACCAAGTCACATTTTTTgct  
cgagctggcgaattcc  
>CD\_NM\_181780.2:189  
CgCctGcgagtctGGtatGCTGCTTGGAACTGGGAAATTATTTCAAGAGAATAATTTCCCAGTTCCAAGCATTTTTTgct  
cgagctggcgaattcc  
>CD\_NM\_181780.2:688  
CgCctGcgagtctGGtatGACCTGTTCTGCTGCCTGAGAAGTTCAAGAGACTTCTCAGGCAGCAGAACAGGCTTTTTGct  
cgagctggcgaattcc  
>CD\_NM\_181780.2:473  
CgCctGcgagtctGGtatGCTTCGAACCAGTGCTTCCTAATTTCAAGAGAATTAGGAAGCACTGGTTCGAAATTTTTGct  
cgagctggcgaattcc  
>CD\_NM\_181780.2:879  
CgCctGcgagtctGGtatGAAGGAAGGGTCTGAAGTTTATTTTCAAGAGAAATAAACTTCAGACCCTTCTGTTTTTgct  
cgagctggcgaattcc  
>CD\_NM\_181780.2:1019  
CgCctGcgagtctGGtatGCTCCATATGTGTGAGGAGTTAATTTCAAGAGATTAACCTCTCACACATATGGATTTTTTgct  
cgagctggcgaattcc  
>CD\_NM\_181780.2:817  
CgCctGcgagtctGGtatGACCAAGTACTGCTATCAGAACTTCAAGAGAGTTTCTGATAGCAGTACTTGGGTTTTTgct  
cgagctggcgaattcc  
>CD\_NM\_181780.2:736  
CgCctGcgagtctGGtatGATGACACAGCAGGAAGGGAAATTTCAAGAGAATTTCCCTTCTGCTGTGTCAGTTTTTgct  
cgagctggcgaattcc  
>CD\_NM\_181780.2:815  
CgCctGcgagtctGGtatGCTCCCAAGTACTGCTATCAGAATTTCAAGAGATTCTGATAGCAGTACTTGGGAATTTTTgct  
cgagctggcgaattcc  
>CD\_NM\_181780.2:828  
CgCctGcgagtctGGtatGATATCAGAACTGGAATTTATGTTCAAGAGACATAAATTTCCAGTTTCTGATAGTTTTTgct  
cgagctggcgaattcc  
>CD\_NM\_181780.2:526  
CgCctGcgagtctGGtatGCTCAGTCTAATCTCATTGAAAGTTCAAGAGACTTTCAATGAGATTAGACTGAATTTTTTgct  
cgagctggcgaattcc  
>CD\_NM\_181780.2:258  
CgCctGcgagtctGGtatGAGGAAAGAATCATGTGATGTACTTCAAGAGAGTACATCACATGATTCTTTCCCTTTTTGct  
cgagctggcgaattcc  
>CD\_NM\_181780.2:174  
CgCctGcgagtctGGtatGCAGACATTGCCATGCTTGTTCAGAGACAAGCATGGCAGGCAATGTCTTTTTTTTgct  
cgagctggcgaattcc  
>CD\_NM\_181780.2:772  
CgCctGcgagtctGGtatGATCACCTTAAGAGTGAGCAAATTTCAAGAGAGTTTGTCTACTCTTAAGGTGAGTTTTTgct  
cgagctggcgaattcc  
>CD\_NM\_181780.2:214  
CgCctGcgagtctGGtatGAGGTCTTCTTCTTAATCCCATATTTCAAGAGATATGGGATTAAGAAGAAGACCCTTTTTGct  
cgagctggcgaattcc  
>CD\_NM\_181780.2:479  
CgCctGcgagtctGGtatGCCAGTGCTTCCTAATGACAATTTCAAGAGAATTGTCATTAGGAAGCACTGGTTTTTTgct  
cgagctggcgaattcc  
>CD\_NM\_181780.2:685

CgCctGcgagtctGGtatGCCTGCCTGTTCTGCTGCCTGAGTTCAAGAGACTCAGGCAGCAGAACAGGCAGATTTTTGct  
cgagctggcgaattcc  
>CD\_NM\_181780.2:950  
CgCctGcgagtctGGtatGAAACCATTCTGTCATTGGACTGTTCAAGAGACAGTCCAATGACAGAATGGTCTTTTTGct  
cgagctggcgaattcc  
>CD\_NM\_181780.2:266  
CgCctGcgagtctGGtatGCTCATGTGATGTACAGCTTTATTTCAAGAGAATAAAGCTGTACATCACATGATTTTTGct  
cgagctggcgaattcc  
>CD\_NM\_181780.2:624  
CgCctGcgagtctGGtatGACCTGGCTCCTGTATAGTTTACTTCAAGAGAGTAACTATACAGGAGCCAGGGTTTTGct  
cgagctggcgaattcc  
>CD\_NM\_181780.2:269  
CgCctGcgagtctGGtatGCTGTGATGTACAGCTTTATATATTCAAGAGATATATAAAGCTGTACATCACATTTTTGct  
cgagctggcgaattcc  
>CD\_NM\_181780.2:344  
CgCctGcgagtctGGtatGACCTGTGAAATACTGTGCTAACTTCAAGAGAGTTAGCACAGTATTTACAGGGTTTTGct  
cgagctggcgaattcc  
>CD\_NM\_181780.2:320  
CgCctGcgagtctGGtatGCGGAGATCCCTTTGAACTAGAATTCAAGAGATTCTAGTTCAAAGGGATCTCCTTTTTGct  
cgagctggcgaattcc  
>CD\_NM\_181780.2:884  
CgCctGcgagtctGGtatGCGGGTCTGAAGTTTATTCTAATTTCAAGAGAATTAGAATAAACTTCAGACCCTTTTTGct  
cgagctggcgaattcc  
>CD\_NM\_181780.2:271  
CgCctGcgagtctGGtatGATGATGTACAGCTTTATATAAAATTTCAAGAGATTTATATAAAGCTGTACATCACATTTTTGct  
cgagctggcgaattcc  
>CD\_NM\_181780.2:333  
CgCctGcgagtctGGtatGAAACTAGAATGCCCTGTGAAATTTCAAGAGAATTTACAGGGCATTCTAGTTCTTTTTGct  
cgagctggcgaattcc  
>CD\_NM\_181780.2:761  
CgCctGcgagtctGGtatGACTGGTTGATGCTCACCTTAAGTTCAAGAGACTTAAGGTGAGCATCAACCAGTTTTGct  
cgagctggcgaattcc  
>CD\_NM\_181780.2:776  
CgCctGcgagtctGGtatGACTTAAGAGTGAGCAAACAGAATTTCAAGAGATTCTGTTTGCTCACTCTTAAGTTTTGct  
cgagctggcgaattcc  
>CD\_NM\_025239:332  
CgCctGcgagtctGGtatGCCCCTAAGGAAGTGTACATAATTTCAAGAGAATTATGTACAGTTCCTTAGGGATTTTTGct  
cgagctggcgaattcc  
>CD\_NM\_025239:509  
CgCctGcgagtctGGtatGCGGCCTCGTTCACATACCTCATTCAAGAGATGAGGTATGTGGAACGAGGCCTTTTGct  
cgagctggcgaattcc  
>CD\_NM\_025239:706  
CgCctGcgagtctGGtatGATGGCAGAAATATCCTGGCCAATTCAAGAGATTGGCCAGGATACTTCTGCCAGTTTTGct  
cgagctggcgaattcc  
>CD\_NM\_025239:911  
CgCctGcgagtctGGtatGCTCCAAGTGGCTGCTTACATTTCAAGAGAATGTGAAGCAGCCAAGTTGGATTTTTGct  
cgagctggcgaattcc  
>CD\_NM\_025239.2:879  
CgCctGcgagtctGGtatGAACCTTCAAAGTCAGATGGAACCTTCAAGAGAGTTCCATCTGACTTTGAAGTCTTTTTGct  
cgagctggcgaattcc  
>CD\_NM\_025239.2:596  
CgCctGcgagtctGGtatGATACCTGACTCTGAAAGTCAAATTTCAAGAGATTTGACTTTTCAAGAGTCAGGTACTTTTTGct  
cgagctggcgaattcc  
>CD\_NM\_025239.2:470

CgCctGcgagtctGGtatGCAGAGCCACTTTGCTGGAGGAGTTCAAGAGACTCCTCCAGCAAAGTGGCTCTTTTTTTGct  
cgagctggcgaattcc  
>CD\_NM\_025239.2:320  
CgCctGcgagtctGGtatGAACAGTGACAGTCCCTAAGGAATTC AAGAGATTCCTTAGGGACTGTCACTGTGTTTTTTGct  
cgagctggcgaattcc  
>CD\_NM\_025239.2:301  
CgCctGcgagtctGGtatGCCAGATAGCAGCTTTATTCACTTCAAGAGAGTGAATAAAGCTGCTATCTGGTTTTTTGct  
cgagctggcgaattcc  
>CD\_NM\_025239.2:654  
CgCctGcgagtctGGtatGATTCCAGAAACAGATGAGGTAGTTCAAGAGACTACCTCATCTGTTTCTGGAACTTTTTTGct  
cgagctggcgaattcc  
>CD\_NM\_025239.2:673  
CgCctGcgagtctGGtatGCAGAGCTCACCTGCCAGGCTACTTCAAGAGAGTAGCCTGGCAGGTGAGCTCTATTTTTGct  
cgagctggcgaattcc  
>CD\_NM\_025239.2:332  
CgCctGcgagtctGGtatGACCTAAGGAAGTGTACATAATATTCAAGAGATATTATGTACAGTTCTTAGGGTTTTTTGct  
cgagctggcgaattcc  
>CD\_NM\_025239.2:632  
CgCctGcgagtctGGtatGCATAAACACTCACATCCTAAAGTTCAAGAGACTTTAGGATGTGAGTGTTTATTTTTTTGct  
cgagctggcgaattcc  
>CD\_NM\_025239.2:281  
CgCctGcgagtctGGtatGAAGCCTGGAATTGCAGCTTCACTTCAAGAGAGTGAAGCTGCAATTCCAGGCTCTTTTTGct  
cgagctggcgaattcc  
>CD\_NM\_025239.2:692  
CgCctGcgagtctGGtatGCACAGGTTATCCTCTGGCAGAATTC AAGAGATTCCTGCCAGAGGATAACCTGTATTTTTGct  
cgagctggcgaattcc  
>CD\_NM\_025239.2:826  
CgCctGcgagtctGGtatGCCAGCTGTGTGTTCTGGAATACTTCAAGAGAGTATTCCAGAACACACAGCTGATTTTTGct  
cgagctggcgaattcc  
>CD\_NM\_025239.2:911  
CgCctGcgagtctGGtatGCCCAACTTGGCTGCTTACATTTTTCAAGAGAAATGTGAAGCAGCCAAGTTGGATTTTTGct  
cgagctggcgaattcc  
>CD\_NM\_025239.2:872  
CgCctGcgagtctGGtatGAAGCATTGACCTTCAAAGTCAGTTCAAGAGACTGACTTTGAAGGTCAATGCTGTTTTTTGct  
cgagctggcgaattcc  
>CD\_NM\_025239.2:824  
CgCctGcgagtctGGtatGATTACAGCTGTGTGTTCTGGAATTTCAAGAGAATTCAGAACACACAGCTGAAGTTTTTTGct  
cgagctggcgaattcc  
>CD\_NM\_025239.2:384  
CgCctGcgagtctGGtatGCACTTTGACACTGGAAGTCATGTTCAAGAGACATGACTTCCAGTGTCAAAGTTTTTTGct  
cgagctggcgaattcc  
>CD\_NM\_025239.2:610  
CgCctGcgagtctGGtatGCAGTCAAAGCTTCTACAGGAATTC AAGAGATTCCTGTAGGAAGCTTTGACTTTTTTTGct  
cgagctggcgaattcc  
>CD\_NM\_025239.2:550  
CgCctGcgagtctGGtatGAACAGTACCAATGCATAATCATTTC AAGAGAATGATTATGCATTGGTACTGTCTTTTTGct  
cgagctggcgaattcc  
>CD\_NM\_025239.2:690  
CgCctGcgagtctGGtatGACTACAGGTTATCCTCTGGCAGTTCAAGAGACTGCCAGAGGATAACCTGTAGCTTTTTTTGct  
cgagctggcgaattcc  
>CD\_NM\_025239.2:326  
CgCctGcgagtctGGtatGAACAGTCCCTAAGGAAGTGTACTTCAAGAGAGTACAGTTCTTAGGGACTGTCTTTTTTTGct  
cgagctggcgaattcc  
>CD\_NM\_025239.2:602

CgCctGcgagtctGGtatGAACTCTGAAAGTCAAAGCTTCCTTCAAGAGAGGAAGCTTTGACTTTCAGAGTCTTTTTGct  
cgagctggcgaattcc  
>CD\_NM\_025239.2:785  
CgCctGcgagtctGGtatGAACCAGTGTCTGCGCCTAAAGTTCAAGAGACTTTAGGGCGCAGAACACTGGTGTTTTTGct  
cgagctggcgaattcc  
>CD\_NM\_025239.2:365  
CgCctGcgagtctGGtatGAAATGTGACCCTGGAATGCAACTTCAAGAGAGTTGCATTCCAGGGTCACATTGTTTTGct  
cgagctggcgaattcc  
>CD\_NM\_025239.2:303  
CgCctGcgagtctGGtatGAAGATAGCAGCTTTATTCACAGTTCAAGAGACTGTGAATAAAGCTGCTATCTGTTTTGct  
cgagctggcgaattcc  
>CD\_NM\_025239.2:359  
CgCctGcgagtctGGtatGCGGCAGCAATGTGACCCTGGAATTCAAGAGATTCCAGGGTCACATTGCTGCCATTTTTGct  
cgagctggcgaattcc  
>CD\_NM\_025239.2:942  
CgCctGcgagtctGGtatGCCCTGCATCATTTGCTTTCATTTTTCAAGAGAAAATGAAAGCAATGATGCAGGATTTTTGct  
cgagctggcgaattcc  
>CD\_NM\_025239.2:967  
CgCctGcgagtctGGtatGCAGCCACAGTGATAGCCCTAAGTTCAAGAGACTTAGGGCTATCACTGTGGCTATTTTTGct  
cgagctggcgaattcc  
>CD\_NM\_025239.2:965  
CgCctGcgagtctGGtatGAATAGCCACAGTGATAGCCCTATTCAAGAGATAGGGCTATCACTGTGGCTATTTTTGct  
cgagctggcgaattcc  
>CD\_NM\_025239.2:371  
CgCctGcgagtctGGtatGAACCCTGGAATGCAACTTTGACTTCAAGAGAGTCAAAGTTGCATTCCAGGGTCTTTTTGct  
cgagctggcgaattcc  
>CD\_NM\_014143:55  
CgCctGcgagtctGGtatGAAGGATATTTGCTGTCTTTATATTCAAGAGATATAAAGACAGCAAATATCCTCTTTTTGct  
cgagctggcgaattcc  
>CD\_NM\_014143:685  
CgCctGcgagtctGGtatGCAGGAGATTAGATCCTGAGGAATTCAAGAGATTCCTCAGGATCTAATCTCCTATTTTTGct  
cgagctggcgaattcc  
>CD\_NM\_014143:52  
CgCctGcgagtctGGtatGAATGAGGATATTTGCTGTCTTTTTCAAGAGAAAAGACAGCAAATATCCTCATTTTTGct  
cgagctggcgaattcc  
>CD\_NM\_014143:147  
CgCctGcgagtctGGtatGCTGGTAGCAATATGACAATTGATTCAAGAGATCAATTGTCATATTGCTACCATTTTTGct  
cgagctggcgaattcc  
>CD\_NM\_014143:840  
CgCctGcgagtctGGtatGCAGGGAGAAATGATGGATGTGAATTCAAGAGATTCACATCCATCATTCTCCCTTTTTGct  
cgagctggcgaattcc  
>CD\_NM\_014143.2:423  
CgCctGcgagtctGGtatGACGAATTACTGTGAAAGTCAATTTCAAGAGAATTGACTTTCACAGTAATTCGCTTTTTGct  
cgagctggcgaattcc  
>CD\_NM\_014143.2:685  
CgCctGcgagtctGGtatGCGGAGATTAGATCCTGAGGAAATTCAAGAGATTCCTCAGGATCTAATCTCCTTTTTGct  
cgagctggcgaattcc  
>CD\_NM\_014143.2:742  
CgCctGcgagtctGGtatGATGGCACATCCTCCAAATGAAATTCAAGAGATTTCAATTTGGAGGATGTGCCAGTTTTGct  
cgagctggcgaattcc  
>CD\_NM\_014143.2:493  
CgCctGcgagtctGGtatGCCCTCTGAACATGAACTGACATTTCAAGAGAATGTCAGTTCATGTTTCAGAGGTTTTGct  
cgagctggcgaattcc  
>CD\_NM\_014143.2:790

CgCctGcgagtctGGtatGCTCTTATTATGCCCTTGGTGTAGTTCAAGAGACTACACCAAGGCATAATAAGATTTTTTGct  
cgagctggcgaattcc  
>CD\_NM\_014143.2:206  
CgCctGcgagtctGGtatGAACTAATTGTCTATTGGGAAATTTCAAGAGAAATTTCCAATAGACAATTAGTGTTTTTGct  
cgagctggcgaattcc  
>CD\_NM\_014143.2:889  
CgCctGcgagtctGGtatGCAGAAGCAAAGTGATACACATTTTCAAGAGAAATGTGTATCACTTTGCTTCTTTTTTTGct  
cgagctggcgaattcc  
>CD\_NM\_014143.2:147  
CgCctGcgagtctGGtatGCGGTAGCAATATGACAATTGAATTTCAAGAGATTCAATTGTCATATTGCTACCATTTTTGct  
cgagctggcgaattcc  
>CD\_NM\_014143.2:136  
CgCctGcgagtctGGtatGATGGTAGAGTATGGTAGCAATATTCAAGAGATATTGCTACCATACTCTACCACTTTTGct  
cgagctggcgaattcc  
>CD\_NM\_014143.2:818  
CgCctGcgagtctGGtatGAATTCATCTTCCGTTTAAGAAATTTCAAGAGATTTCTTAAACGGAAGATGAATGTTTTGct  
cgagctggcgaattcc  
>CD\_NM\_014143.2:55  
CgCctGcgagtctGGtatGCGGATATTTGCTGTCTTTATATTTCAAGAGAAATAAAGACAGCAAATATCCTTTTTTGct  
cgagctggcgaattcc  
>CD\_NM\_014143.2:630  
CgCctGcgagtctGGtatGAACCAGCACACTGAGAATCAACTTCAAGAGAGTTGATTCTCAGTGTGCTGGTCTTTTTGct  
cgagctggcgaattcc  
>CD\_NM\_014143.2:204  
CgCctGcgagtctGGtatGCGCACTAATTGTCTATTGGGAAATTTCAAGAGATTCCAATAGACAATTAGTGCATTTTTGct  
cgagctggcgaattcc  
>CD\_NM\_014143.2:126  
CgCctGcgagtctGGtatGAGACCTATATGTGGTAGAGTATTTCAAGAGAATACTCTACCACATATAGGTCCTTTTTGct  
cgagctggcgaattcc  
>CD\_NM\_014143.2:87  
CgCctGcgagtctGGtatGATGGCATTGCTGAACGCATTTTTTCAAGAGAAAATGCGTTCAGCAAATGCCAGTTTTGct  
cgagctggcgaattcc  
>CD\_NM\_014143.2:52  
CgCctGcgagtctGGtatGCTGAGGATATTTGCTGTCTTTATTTCAAGAGATAAAGACAGCAAATATCCTCATTTTTGct  
cgagctggcgaattcc  
>CD\_NM\_014143.2:714  
CgCctGcgagtctGGtatGCGCTGAATTGGTCATCCCAGAATTTCAAGAGATTCTGGGATGACCAATTCAGCTTTTTGct  
cgagctggcgaattcc  
>CD\_NM\_014143.2:243  
CgCctGcgagtctGGtatGCATTCAATTTGTGCATGGAGAGTTCAAGAGACTCTCCATGCACAAATTGAATATTTTTGct  
cgagctggcgaattcc  
>CD\_NM\_014143.2:66  
CgCctGcgagtctGGtatGCGTCTTTATATTCATGACCTACTTCAAGAGAGTAGGTCATGAATATAAAGACATTTTTGct  
cgagctggcgaattcc  
>CD\_NM\_014143.2:342  
CgCctGcgagtctGGtatGCGCACTTCAGATCACAGATGTGTTCAAGAGACACATCTGTGATCTGAAGTGCATTTTTGct  
cgagctggcgaattcc  
>CD\_NM\_014143.2:65  
CgCctGcgagtctGGtatGATGTCTTTATATTCATGACCTATTTCAAGAGATAGGTCATGAATATAAAGACAGTTTTGct  
cgagctggcgaattcc  
>CD\_NM\_014143.2:539  
CgCctGcgagtctGGtatGACGAAGTCATCTGGACAAGCAGTTCAAGAGACTGCTTGTCCAGATGACTTCGGTTTTGct  
cgagctggcgaattcc  
>CD\_NM\_014143.2:638

CgCctGcgagtctGGtatGAACTGAGAATCAACACAACAACCTTCAAGAGAGTTGTTGTGTTGATTCTCAGTGTTTTTGct  
cgagctggcgaattcc  
>CD\_NM\_014143.2:498  
CgCctGcgagtctGGtatGCGAACATGAACTGACATGTCAGTTCAAGAGACTGACATGTCAGTTCATGTTCAATTTTTGct  
cgagctggcgaattcc  
>CD\_NM\_014143.2:380  
CgCctGcgagtctGGtatGAGGTGTACCGCTGCATGATCAGTTCAAGAGACTGATCATGCAGCGGTACACCCTTTTTGct  
cgagctggcgaattcc  
>CD\_NM\_014143.2:210  
CgCctGcgagtctGGtatGCATTGTCTATTGGGAAATGGAGTTCAAGAGACTCCATTTCCCAATAGACAATTTTTTTGct  
cgagctggcgaattcc  
>CD\_NM\_014143.2:550  
CgCctGcgagtctGGtatGCGGACAAGCAGTGACCATCAAGTTCAAGAGACTTGATGGTCACTGCTTGTCATTTTTGct  
cgagctggcgaattcc  
>CD\_NM\_014143.2:903  
CgCctGcgagtctGGtatGCACACATTTGGAGGAGACGTAATTCAAGAGATTACGTCTCCTCCAAATGTGTATTTTTGct  
cgagctggcgaattcc  
>CD\_NM\_015259:630  
CgCctGcgagtctGGtatGCGGCCAACGTGTACTGGATCATTCAAGAGATGATCCAGTACACGTTGGGCCTTTTTTTGct  
cgagctggcgaattcc  
>CD\_NM\_015259:868  
CgCctGcgagtctGGtatGCTCCAGTCAGTACCGGCGAGAATTCAAGAGATTCTCGCCGGTACTGACTGGATTTTTTTGct  
cgagctggcgaattcc  
>CD\_NM\_015259:596  
CgCctGcgagtctGGtatGAACCTTCACGTGTACATCCATATTCAAGAGATATGGATGTACACGTGAAGGTGTTTTTTGct  
cgagctggcgaattcc  
>CD\_NM\_015259.4:523  
CgCctGcgagtctGGtatGCACACTGCATGTGGCAGCAAACCTTCAAGAGAGTTTGCTGCCACATGCAGTGTATTTTTGct  
cgagctggcgaattcc  
>CD\_NM\_015259.4:690  
CgCctGcgagtctGGtatGCTGACACCGTCTTCTTGAACATTTCAAGAGAATGTTCAAGAAGACGGTGTCAATTTTTTTGct  
cgagctggcgaattcc  
>CD\_NM\_015259.4:847  
CgCctGcgagtctGGtatGAAGAGACAAGATCACAGAGAATTTCAAGAGAATTCTCTGTGATCTTGTCTCTTTTTTTGct  
cgagctggcgaattcc  
>CD\_NM\_015259.4:781  
CgCctGcgagtctGGtatGAATAGAGAACGTGCTTCTGCAGTTCAAGAGACTGCAGAAGCACGTTCTCTATGTTTTTTGct  
cgagctggcgaattcc  
>CD\_NM\_015259.4:807  
CgCctGcgagtctGGtatGCCCTGACTGTCGGCAGCCAGACTTCAAGAGAGTCTGGCTGCCGACAGTCAGGTTTTTTGct  
cgagctggcgaattcc  
>CD\_NM\_015259.4:1003  
CgCctGcgagtctGGtatGAGCTGTGAGTCCGGAGACAGAGTTCAAGAGACTCTGTCTCCGGACTCACAGCCTTTTTTTGct  
cgagctggcgaattcc  
>CD\_NM\_015259.4:423  
CgCctGcgagtctGGtatGACCTGCGCTTGTTCACGTCACCTTCAAGAGAGTGACGTTGAACAAGCGCAGGGTTTTTTGct  
cgagctggcgaattcc  
>CD\_NM\_015259.4:824  
CgCctGcgagtctGGtatGAAGACAGGAAATGACATCGGAGTTCAAGAGACTCCGATGTCATTTCTGTCTGTTTTTTGct  
cgagctggcgaattcc  
>CD\_NM\_015259.4:588  
CgCctGcgagtctGGtatGCTGAGCTCACCTTACGTGTACTTCAAGAGAGTACACGTGAAGGTGAGCTCAATTTTTTTGct  
cgagctggcgaattcc  
>CD\_NM\_015259.4:184

CgCctGcgagtctGGtatGCGCTGATACTCAGGAGAAGGAATTCAAGAGATTCTTCTCCTGAGTATCAGCTTTTTTGct  
cgagctggcgaattcc  
>CD\_NM\_015259.4:417  
CgCctGcgagtctGGtatGCCTTCTCCCTGCGCTTGTTCAATTCAAGAGATTGAACAAGCGCAGGGAGAAGTTTTTTGct  
cgagctggcgaattcc  
>CD\_NM\_015259.4:945  
CgCctGcgagtctGGtatGCGGCCATAGGCTGGGTGTGCAGTTCAAGAGACTGCACACCCAGCCTATGGCCATTTTTGct  
cgagctggcgaattcc  
>CD\_NM\_015259.4:727  
CgCctGcgagtctGGtatGAGTGGTCAGCGTGCTGAGGATCTTCAAGAGAGATCCTCAGCACGCTGACCACGTTTTTGct  
cgagctggcgaattcc  
>CD\_NM\_015259.4:1001  
CgCctGcgagtctGGtatGCGGGCTGTGAGTCCGGAGACAGTTCAAGAGACTGTCTCCGGACTCACAGCCCATTTTTGct  
cgagctggcgaattcc  
>CD\_NM\_015259.4:688  
CgCctGcgagtctGGtatGAAATGACACCGTCTTCTTGAAC TTCAAGAGAGTTCAAGAAGACGGTGTCAATCTTTTTGct  
cgagctggcgaattcc  
>CD\_NM\_015259.4:857  
CgCctGcgagtctGGtatGCTCACAGAGAATCCAGTCAGTATTCAAGAGATACTGACTGGATTCTCTGTGATTTTTTGct  
cgagctggcgaattcc  
>CD\_NM\_015259.4:580  
CgCctGcgagtctGGtatGATCCCAGGATGAGCTCACCTTCTTCAAGAGAGAAGGTGAGCTCATCTGGGAGTTTTTGct  
cgagctggcgaattcc  
>CD\_NM\_015259.4:673  
CgCctGcgagtctGGtatGAGACCAGGCTCTGCAGAATGACTTCAAGAGAGTCATTCTGCAGAGCCTGGTCCTTTTTGct  
cgagctggcgaattcc  
>CD\_NM\_015259.4:826  
CgCctGcgagtctGGtatGAACAGGAAATGACATCGGAGAGTTCAAGAGACTCTCCGATGTCATTTCTGTCTTTTTGct  
cgagctggcgaattcc  
>CD\_NM\_015259.4:156  
CgCctGcgagtctGGtatGCGCTCTTCTGCTCTTTCAGCAGTTCAAGAGACTGCTGAAGAGCAGGAAGAGCATTTTTGct  
cgagctggcgaattcc  
>CD\_NM\_015259.4:322  
CgCctGcgagtctGGtatGAACCTACCACATCCCACAGAACTTCAAGAGAGTTCTGTGGGATGTGGTAGGTCTTTTTGct  
cgagctggcgaattcc  
>CD\_NM\_015259.4:916  
CgCctGcgagtctGGtatGCGTCTGTGCTGCTTGTGGTCTTCAAGAGAGACCACAAGCAGGCACAGGACATTTTTGct  
cgagctggcgaattcc  
>CD\_NM\_015259.4:511  
CgCctGcgagtctGGtatGAAGCGTTGAGGTTACTGCATTTCAAGAGAAATGCAGTGTAACCTCAACGCTCTTTTTGct  
cgagctggcgaattcc  
>CD\_NM\_015259.4:655  
CgCctGcgagtctGGtatGAACGGACAACAGCCTGCTGGACTTCAAGAGAGTCCAGCAGGCTGTTGTCCGCTTTTTGct  
cgagctggcgaattcc  
>CD\_NM\_015259.4:628  
CgCctGcgagtctGGtatGAAGGCCAACGTGTACTGGATCTTCAAGAGAGATCCAGTACACGTTGGGCCTGTTTTGct  
cgagctggcgaattcc  
>CD\_NM\_015259.4:634  
CgCctGcgagtctGGtatGAAACGTGTACTGGATCAATAAGTTCAAGAGACTTATTGATCCAGTACACGTTGTTTTGct  
cgagctggcgaattcc  
>CD\_NM\_015259.4:787  
CgCctGcgagtctGGtatGAAACGTGCTTCTGCAGCAGAACTTCAAGAGAGTTCTGCTGCAGAAGCACGTTCTTTTTGct  
cgagctggcgaattcc  
>CD\_NM\_015259.4:239

CgCctGcgagtctGGtatGCGCTGCGCTTGCCCTGAAGGAATTCAAGAGATTCCTTCAGGGCAAGCGCAGCTTTTTTGct  
cgagctggcgaattcc  
>CD\_NM\_015259.4:868  
CgCctGcgagtctGGtatGCCAGTCAGTACCGGCGAGAAATTCAGAGATTTCTCGCCGGTACTGACTGGATTTTTGct  
cgagctggcgaattcc  
>CD\_NM\_015259.4:769  
CgCctGcgagtctGGtatGAATTGGCTGCTGCATAGAGAACTTCAAGAGAGTTCTCTATGCAGCAGCCAATGTTTTGct  
cgagctggcgaattcc  
>CD\_NM\_025240:1063  
CgCctGcgagtctGGtatGCGCCTGGCACAGCTCAACCTCATTCAAGAGATGAGGTTGAGCTGTGCCAGGCTTTTTGct  
cgagctggcgaattcc  
>CD\_NM\_025240:1138  
CgCctGcgagtctGGtatGAACCAGGGCAGCGCCTATGCCATTCAAGAGATGGCATAGGCGCTGCCCTGGTCTTTTTGct  
cgagctggcgaattcc  
>CD\_NM\_025240:1297  
CgCctGcgagtctGGtatGAAGGTGGCCGCTCCCTACTCGATTCAAGAGATCGAGTAGGGAGCGGCCACCTGTTTTGct  
cgagctggcgaattcc  
>CD\_NM\_025240:1511  
CgCctGcgagtctGGtatGCGCGGGTGGTGCTGGGTGCGAATTCAGAGATTCGCACCCAGCACCCCGCATTTTTTGct  
cgagctggcgaattcc  
>CD\_NM\_025240:1684  
CgCctGcgagtctGGtatGATGGCTTTCGTGTGCTGGAGAATTCAGAGATTCCTCCAGCACACGAAAGCCAGTTTTGct  
cgagctggcgaattcc  
>CD\_NM\_025240:1690  
CgCctGcgagtctGGtatGCTCGTGTGCTGGAGAAAGATCATTCAAGAGATGATCTTTCTCCAGCACACGAATTTTTGct  
cgagctggcgaattcc  
>CD\_NM\_001024736.1:1791  
CgCctGcgagtctGGtatGATGAAACACTCTGACAGCAAAGTTCAAGAGACTTTGCTGTGAGAGTGTTCAGTTTTGct  
cgagctggcgaattcc  
>CD\_NM\_001024736.1:1806  
CgCctGcgagtctGGtatGCGCAAAGAAGATGATGGACAAGTTCAAGAGACTTGTCCATCATCTTCTTTGCTTTTTGct  
cgagctggcgaattcc  
>CD\_NM\_001024736.1:1652  
CgCctGcgagtctGGtatGATCTGTCTGTCTCATTGCACTGTTCAAGAGACAGTGAATGAGACAGACAGACTTTTTGct  
cgagctggcgaattcc  
>CD\_NM\_001024736.1:1684  
CgCctGcgagtctGGtatGCGGCTTTCGTGTGCTGGAGAAATTCAGAGATTTCTCCAGCACACGAAAGCCATTTTTGct  
cgagctggcgaattcc  
>CD\_NM\_001024736.1:1650  
CgCctGcgagtctGGtatGATGTCTGTCTGTCTCATTGCACTTCAAGAGAGTGAATGAGACAGACAGACAGTTTTGct  
cgagctggcgaattcc  
>CD\_NM\_001024736.1:367  
CgCctGcgagtctGGtatGCTGCCACCCTGTGCTGCTCCTTTTCAAGAGAAAGGAGCAGCACAGGGTGGCATTTTTTGct  
cgagctggcgaattcc  
>CD\_NM\_001024736.1:518  
CgCctGcgagtctGGtatGATTCCTGGACCTGCTGGCACAGTTCAAGAGACTGTGCCAGCAGGTCCGGGAAGTTTTGct  
cgagctggcgaattcc  
>CD\_NM\_001024736.1:1172  
CgCctGcgagtctGGtatGATTCCTGGACCTGCTGGCACAAATTCAGAGATTTGTGCCAGCAGGTCCGGGAAGTTTTGct  
cgagctggcgaattcc  
>CD\_NM\_001024736.1:1586  
CgCctGcgagtctGGtatGATCTGTACCATCACAGGGCAGTTCAAGAGACTGCCCTGTGATGGTGACAGAGTTTTGct  
cgagctggcgaattcc  
>CD\_NM\_001024736.1:535



CgCtGcgagtctGGtatGAACAGGGCAACGCATCCCTGAGTTCAAGAGACTCAGGGATGCGTTGCCCTGTGTTTTTGct  
cgagctggcgaattcc  
>CD\_NM\_001024736.1:1596  
CgCtGcgagtctGGtatGCTCACAGGGCAGCCTATGACATTTCAAGAGAATGTCATAGGCTGCCCTGTGATTTTTTGct  
cgagctggcgaattcc  
>CD\_NM\_001024736.1:668  
CgCtGcgagtctGGtatGAAGCATGACCCTGGAGCCCAACTTCAAGAGAGTTGGGCTCCAGGGTCATGCTGTTTTTGct  
cgagctggcgaattcc  
>CD\_NM\_001024736.1:1322  
CgCtGcgagtctGGtatGAAGCATGACCCTGGAGCCCAACTTCAAGAGAGTTGGGCTCCAGGGTCATGCTGTTTTTGct  
cgagctggcgaattcc  
>CD\_NM\_001024736.1:586  
CgCtGcgagtctGGtatGACAGCTTACCTGCTTCGTGAGTTCAAGAGACTCACGAAGCAGGTGAAGCTGCTTTTTTGct  
cgagctggcgaattcc  
>CD\_NM\_001024736.1:1240  
CgCtGcgagtctGGtatGACAGCTTACCTGCTTCGTGAGTTCAAGAGACTCACGAAGCAGGTGAAGCTGCTTTTTTGct  
cgagctggcgaattcc  
>CD\_NM\_001024736.1:432  
CgCtGcgagtctGGtatGCGGCAGCTGACAGATAACAACTTCAAGAGAGTTTGGTATCTGTCAGCTGCCATTTTTTGct  
cgagctggcgaattcc  
>CD\_NM\_001024736.1:857  
CgCtGcgagtctGGtatGACGGGTGGTGTGGGTGCAAATTTCAAGAGAATTTGCACCCAGCACCACCCGTTTTTGct  
cgagctggcgaattcc  
>CD\_NM\_001024736.1:1366  
CgCtGcgagtctGGtatGAGGTGACCATCACGTGCTCCAGTTCAAGAGACTGGAGCACGTGATGGTCACCGTTTTTGct  
cgagctggcgaattcc  
>CD\_NM\_001024736.1:712  
CgCtGcgagtctGGtatGAGGTGACCATCACGTGCTCCAGTTCAAGAGACTGGAGCACGTGATGGTCACCGTTTTTGct  
cgagctggcgaattcc  
>CD\_NM\_001024736.1:1778  
CgCtGcgagtctGGtatGCGCCCTGCAGCCTCTGAAACACTTCAAGAGAGTGTTCAGAGGCTGCAGGGCTTTTTTGct  
cgagctggcgaattcc  
>CD\_NM\_001024736.1:484  
CgCtGcgagtctGGtatGCCAGGGCAGCGCCTATGCCAATTTCAAGAGATTGGCATAGGCGCTGCCCTGGTTTTTGct  
cgagctggcgaattcc  
>CD\_NM\_001024736.1:1138  
CgCtGcgagtctGGtatGCCAGGGCAGCGCCTATGCCAATTTCAAGAGATTGGCATAGGCGCTGCCCTGGTTTTTGct  
cgagctggcgaattcc  
>CD\_NM\_001024736.1:1328  
CgCtGcgagtctGGtatGAACCCTGGAGCCCAACAAGGACTTCAAGAGAGTCCTTGTGGGCTCCAGGGTCTTTTTTGct  
cgagctggcgaattcc  
>CD\_NM\_001024736.1:674  
CgCtGcgagtctGGtatGAACCCTGGAGCCCAACAAGGACTTCAAGAGAGTCCTTGTGGGCTCCAGGGTCTTTTTTGct  
cgagctggcgaattcc  
>CD\_NM\_001024736.1:833  
CgCtGcgagtctGGtatGATTGTTTGTGTGCACAGCATCTTCAAGAGAGATGCTGTGCACATCAAACAAGTTTTTGct  
cgagctggcgaattcc  
>CD\_NM\_001024736.1:1789  
CgCtGcgagtctGGtatGATCTGAAACACTCTGACAGCAATTTCAAGAGATTGCTGTGTCAGAGTGTTCAGAGTTTTTGct  
cgagctggcgaattcc  
>CD\_NM\_001024736.1:1070  
CgCtGcgagtctGGtatGCCAGCTCAACCTCATCTGGCAGTTCAAGAGACTGCCAGATGAGGTTGAGCTGTTTTTGct  
cgagctggcgaattcc  
>CD\_NM\_007048.3:1360

CgCctGcgagtctGGtatGACCTGCGGATGTGATTCTGGATTTCAAGAGAATCCAGAATCACATCCGCAGGCTTTTTTGct  
cgagctggcgaattcc  
>CD\_NM\_007048.3:1258  
CgCctGcgagtctGGtatGCAGAGTGAAGCTCCTGGAGGAATTCAGAGATTCCTCCAGGAGCTTCACTCTTTTTTTGct  
cgagctggcgaattcc  
>CD\_NM\_007048.3:1808  
CgCctGcgagtctGGtatGATCTCCTTCTCTGAGGCTCTATTTCAAGAGAATAGAGCCTCAGAGAAGGAGACTTTTTTGct  
cgagctggcgaattcc  
>CD\_NM\_007048.3:692  
CgCctGcgagtctGGtatGATCACAGCCTCTGACAGTGAATTCAGAGATTCCTACTGTCAGAGGCTGTGACTTTTTTGct  
cgagctggcgaattcc  
>CD\_NM\_007048.3:713  
CgCctGcgagtctGGtatGCAGTACTTGTGTTATTTCCAAGTTCAAGAGACTTGAAATAACACAAGTACTTTTTTTGct  
cgagctggcgaattcc  
>CD\_NM\_007048.3:796  
CgCctGcgagtctGGtatGCCACGTTGATGTGAAGGGTTACTTCAAGAGAGTAACCCTTACATCAACGTGATTTTTGct  
cgagctggcgaattcc  
>CD\_NM\_007048.3:523  
CgCctGcgagtctGGtatGCGCAGAGACCATGGAGCTGAAGTTCAAGAGACTTCAGCTCCATGGTCTCTGCATTTTTGct  
cgagctggcgaattcc  
>CD\_NM\_007048.3:1314  
CgCctGcgagtctGGtatGAAGAGAGACATTCAGCCTATAATTCAGAGATTATAGGCTGAATGTCTCTCTTTTTTGct  
cgagctggcgaattcc  
>CD\_NM\_007048.3:1670  
CgCctGcgagtctGGtatGAGGACTCTAACTGAGCCCAGAATTCAGAGATTCCTGGGCTCAGTTAGAGTCCGTTTTTTGct  
cgagctggcgaattcc  
>CD\_NM\_007048.3:990  
CgCctGcgagtctGGtatGAGGAGGGTGTATCCTGTACCATTTCAAGAGAATGGTACAGGATACACCCTCCCTTTTTGct  
cgagctggcgaattcc  
>CD\_NM\_007048.3:870  
CgCctGcgagtctGGtatGACCAAATACAGTGGAGCAACAATTCAGAGATTGTTGCTCCACTGTATTTGGGTTTTTTGct  
cgagctggcgaattcc  
>CD\_NM\_007048.3:1318  
CgCctGcgagtctGGtatGAAGACATTCAGCCTATAATGAATTCAGAGATTCATTATAGGCTGAATGTCTCTTTTTTGct  
cgagctggcgaattcc  
>CD\_NM\_007048.3:568  
CgCctGcgagtctGGtatGAGTGGTGAACGTGTATGCAGATTTCAAGAGAATCTGCATACACGTTACCACCTTTTTTGct  
cgagctggcgaattcc  
>CD\_NM\_007048.3:605  
CgCctGcgagtctGGtatGAACAGGCAGAGTGCACCGTATCTTCAAGAGAGATACGGTGCCTCTGCCTGTCTTTTTTGct  
cgagctggcgaattcc  
>CD\_NM\_007048.3:578  
CgCctGcgagtctGGtatGATGTATGCAGATGGAAAGGAAGTTCAAGAGACTTCCTTTCCATCTGCATACACTTTTTTGct  
cgagctggcgaattcc  
>CD\_NM\_007048.3:1868  
CgCctGcgagtctGGtatGATGACTATTTGTCCAGCGTGAATTCAGAGATTCACGCTGGACAAATAGTCAGTTTTTTGct  
cgagctggcgaattcc  
>CD\_NM\_007048.3:562  
CgCctGcgagtctGGtatGCAGGCAGGTGGTGAACGTGTATTTCAAGAGAATACAGTTCACCACCTGCCTTTTTTTGct  
cgagctggcgaattcc  
>CD\_NM\_007048.3:694  
CgCctGcgagtctGGtatGAACAGCCTCTGACAGTGGAAAGTTCAAGAGACTTTCCTACTGTCAGAGGCTGTGTTTTTTGct  
cgagctggcgaattcc  
>CD\_NM\_007048.3:1749

CgCctGcgagtctGGtatGATGGAGATATCTCATTCTACAATTCAAGAGATTGTAGAATGAGATATCTCCAGTTTTTGct  
cgagctggcgaattcc  
>CD\_NM\_007048.3:1141  
CgCctGcgagtctGGtatGCGCCGGTTACTTCTGTGGCAATTCAAGAGATTGCCACAGGAAGTAACCGCTTTTTTGct  
cgagctggcgaattcc  
>CD\_NM\_007048.3:1114  
CgCctGcgagtctGGtatGACCTGTCTTGTGCTGCTTCTTTTTCAAGAGAAAGAAGCAGCAGCAAGACAGGCTTTTTTGct  
cgagctggcgaattcc  
>CD\_NM\_007048.3:1468  
CgCctGcgagtctGGtatGACCTGAGAGATTTAATTGGCATTTC AAGAGAATGCCAATTAATCTCTCAGGGTTTTTGct  
cgagctggcgaattcc  
>CD\_NM\_007048.3:406  
CgCctGcgagtctGGtatGACTTCAGCTGCTCATGCCTCACTTCAAGAGAGTGAGGCATGAGCAGCTGAAGCTTTTTTGct  
cgagctggcgaattcc  
>CD\_NM\_007048.3:1201  
CgCctGcgagtctGGtatGAAGAGAGCAAGAGTTGAGAGAATTCAAGAGATTCTCTCAACTCTTGTCTCTCTTTTTTGct  
cgagctggcgaattcc  
>CD\_NM\_007048.3:931  
CgCctGcgagtctGGtatGCGCAGACGGAGTGGCCTGTATTTCAAGAGAATACAGGCCACTCCGTCTGCATTTTTTGct  
cgagctggcgaattcc  
>CD\_NM\_007048.3:367  
CgCctGcgagtctGGtatGAGCCTTCTTCTGCTCAACTTTTTCAAGAGAAAAGTTGAGCAGAAGGAAGGCCTTTTTTGct  
cgagctggcgaattcc  
>CD\_NM\_007048.3:1814  
CgCctGcgagtctGGtatGCTCTCTGAGGCTCTATATCTGTTC AAGAGACAGGATATAGAGCCTCAGAGAATTTTTTGct  
cgagctggcgaattcc  
>CD\_NM\_007048.3:784  
CgCctGcgagtctGGtatGAGGTTCTGATCTTCACGTTGATTTCAAGAGAATCAACGTGAAGATCAGAACCCTTTTTTGct  
cgagctggcgaattcc  
>CD\_NM\_007048.3:1457  
CgCctGcgagtctGGtatGATGCCAGACAACCCTGAGAGATTTCAAGAGAATCTCTCAGGGTTGTCTGGCAGTTTTTGct  
cgagctggcgaattcc  
>CD\_NM\_007048.3:1108  
CgCctGcgagtctGGtatGAACCCTGCCTGTCTTGTGCTGTTCAAGAGACAGCAGCAAGACAGGCAGGGTCTTTTTTGct  
cgagctggcgaattcc  
>CD\_NM\_007048.3:572  
CgCctGcgagtctGGtatGATGAACGTGTATGCAGATGGAATTC AAGAGATTCCATCTGCATACACGTTCACTTTTTTGct  
cgagctggcgaattcc  
>CD\_NM\_007048.3:1789  
CgCctGcgagtctGGtatGCATTCATACTTCTTCTGGACGTTCAAGAGAGACGTCCAGGAAAGTATGAATATTTTTTGct  
cgagctggcgaattcc  
>CD\_NM\_007048.3:1316  
CgCctGcgagtctGGtatGAAGAGACATTCAGCCTATAATGTTCAAGAGACATTATAGGCTGAATGTCTCTCTTTTTTGct  
cgagctggcgaattcc  
>CD\_NM\_012092:168  
CgCctGcgagtctGGtatGACTGACATTGTCCAGCAATTTATTCAAGAGATAAATTGCTGGACAATGTCAGGTTTTTGct  
cgagctggcgaattcc  
>CD\_NM\_012092:109  
CgCctGcgagtctGGtatGATGCCAATTATGAGATGTTTATTTCAAGAGAATAAACATCTCATAATTGGCAGTTTTTGct  
cgagctggcgaattcc  
>CD\_NM\_012092.2:406  
CgCctGcgagtctGGtatGCGGAGGATATTTGCATATTTATTTCAAGAGAATAAATATGCAAATATCCTCCTTTTTTGct  
cgagctggcgaattcc  
>CD\_NM\_012092.2:166

CgCctGcgagtctGGtatGCCCTGACATTGTCCAGCAATTTTTCAAGAGAAAATTGCTGGACAATGTCAGGATTTTTGct  
cgagctggcgaattcc  
>CD\_NM\_012092.2:210  
CgCctGcgagtctGGtatGAGCAAATACTCTGCGATCTCACTTCAAGAGAGTGAGATCGCAGAGTATTTGCCTTTTTGct  
cgagctggcgaattcc  
>CD\_NM\_012092.2:280  
CgCctGcgagtctGGtatGATGCCATTCTCAGTTATCCAACCTTCAAGAGAGTTGGATAACTGAGAATGGCAGTTTTGct  
cgagctggcgaattcc  
>CD\_NM\_012092.2:464  
CgCctGcgagtctGGtatGACCATAGGATGTGCAGCCTTTGTTCAAGAGACAAAGGCTGCACATCCTATGGGTTTTGct  
cgagctggcgaattcc  
>CD\_NM\_012092.2:109  
CgCctGcgagtctGGtatGCGCCAATTATGAGATGTTTATATTCAAGAGATATAAACATCTCATAATTGGCATTTTTGct  
cgagctggcgaattcc  
>CD\_NM\_012092.2:247  
CgCctGcgagtctGGtatGCGGAAACACAGTGTCCATTAAGTTCAAGAGACTTAATGGACACTGTGTTCCATTTTTGct  
cgagctggcgaattcc  
>CD\_NM\_012092.2:389  
CgCctGcgagtctGGtatGCTTAAAGTAACTCTTACAGGAGTTCAAGAGACTCCTGTAAGAGTTACTTTAAATTTTTGct  
cgagctggcgaattcc  
>CD\_NM\_012092.2:249  
CgCctGcgagtctGGtatGAAAACACAGTGTCCATTAAGAGTTCAAGAGACTCTTAATGGACACTGTGTTCTTTTTGct  
cgagctggcgaattcc  
>CD\_NM\_012092.2:616  
CgCctGcgagtctGGtatGAACAGATGTGACCCTATAATATTTCAAGAGAATATTATAGGGTCACATCTGTGTTTTGct  
cgagctggcgaattcc  
>CD\_NM\_012092.2:98  
CgCctGcgagtctGGtatGCTCAATGGTTCGCCAATTATGTTCAAGAGACATAATTGGCAGAACCATTGATTTTTGct  
cgagctggcgaattcc  
>CD\_NM\_012092.2:282  
CgCctGcgagtctGGtatGACCATTCTCAGTTATCCAACAATTCAAGAGATTGTTGGATAACTGAGAATGGCTTTTTGct  
cgagctggcgaattcc  
>CD\_NM\_012092.2:447  
CgCctGcgagtctGGtatGCGCTGAAGTTCTGGTTACCCATTTCAAGAGAATGGGTAACCAGAACTTCAGCTTTTTGct  
cgagctggcgaattcc  
>CD\_NM\_012092.2:507  
CgCctGcgagtctGGtatGACATACTTATTTGTTGGCTTACTTCAAGAGAGTAAGCCAACAAATAAGTATGCTTTTTGct  
cgagctggcgaattcc  
>CD\_NM\_012092.2:416  
CgCctGcgagtctGGtatGCTGCATATTTATGAATCACAACCTTCAAGAGAGTTGTGATTTCATAAATATGCAATTTTTGct  
cgagctggcgaattcc  
>CD\_NM\_012092.2:343  
CgCctGcgagtctGGtatGCGCCAACCTATTACTTCTGCAACTTCAAGAGAGTTGCAGAAGTAATAGTTGGCATTTTTGct  
cgagctggcgaattcc  
>CD\_NM\_012092.2:168  
CgCctGcgagtctGGtatGATGACATTGTCCAGCAATTTAATTCAAGAGATTAAATTGCTGGACAATGTCAGTTTTGct  
cgagctggcgaattcc  
>CD\_NM\_012092.2:134  
CgCctGcgagtctGGtatGAACAACGGAGGTGTACAAATTTTTCAAGAGAAAATTTGTACACCTCCGTTGTTTTTGct  
cgagctggcgaattcc  
>CD\_NM\_012092.2:555  
CgCctGcgagtctGGtatGCCGACCTAACGGTGAATACATTTCAAGAGAATGTATTCACCGTTAGGGTCGTTTTGct  
cgagctggcgaattcc  
>CD\_NM\_012092.2:60

CgCtGcgagtctGGtatGCTCTTCTGCTTGCGCATTAATTCAAGAGATTAATGCGCAAGCAGAAGAGAATTTTTGct  
cgagctggcgaattcc  
>CD\_NM\_012092.2:214  
CgCtGcgagtctGGtatGCATACTCTGCGATCTCACTAAGTTCAAGAGACTTAGTGAGATCGCAGAGTATTTTTTgct  
cgagctggcgaattcc  
>CD\_NM\_012092.2:57  
CgCtGcgagtctGGtatGCCTTTCTTCTGCTTGCGCATTTCAAGAGAATGCGCAAGCAGAAGAGAAAGATTTTTGct  
cgagctggcgaattcc  
>CD\_NM\_012092.2:253  
CgCtGcgagtctGGtatGAACAGTGTCCATTAAGAGTCTGTTCAAGAGACAGACTCTTAATGGACACTGTGTTTTGct  
cgagctggcgaattcc  
>CD\_NM\_012092.2:510  
CgCtGcgagtctGGtatGCACTTATTTGTTGGCTTACAAATTCAGAGATTTGTAAGCCAACAAATAAGTATTTTTGct  
cgagctggcgaattcc  
>CD\_NM\_012092.2:117  
CgCtGcgagtctGGtatGCTGAGATGTTTATATTTTCAAAATTCAGAGATTTGTAAGCCAACAAATAAGTATTTTTGct  
cgagctggcgaattcc  
>CD\_NM\_012092.2:122  
CgCtGcgagtctGGtatGCTGTTTATATTTTCAAAATTCAGAGATTTGTAAGCCAACAAATAAGTATTTTTGct  
cgagctggcgaattcc  
>CD\_NM\_012092.2:164  
CgCtGcgagtctGGtatGCATCCTGACATTTGTCAGCAATTTCAAGAGAATGCTGGACAATGTCAGGATATTTTTGct  
cgagctggcgaattcc  
>CD\_NM\_012092.2:46  
CgCtGcgagtctGGtatGACTCTGGTATTTCTTTCTTCTTCAAGAGAGAAGAGAAAGAAATACCAGAGTTTTTgct  
cgagctggcgaattcc  
>CD\_NM\_012092.2:61  
CgCtGcgagtctGGtatGCCTCTTCTGCTTGCGCATTAATTCAAGAGATTTAATGCGCAAGCAGAAGAGATTTTTGct  
cgagctggcgaattcc  
>CD\_NM\_012092.2:251  
CgCtGcgagtctGGtatGCACACAGTGTCCATTAAGAGTCTTCAAGAGAGACTCTTAATGGACACTGTGTTTTTgct  
cgagctggcgaattcc  
>CD\_NM\_012092.2:259  
CgCtGcgagtctGGtatGATCCATTAAGAGTCTGAAATTTCAAGAGAGAATTTAGACTCTTAATGGACTTTTTTgct  
cgagctggcgaattcc  
>CD\_NM\_005018:815  
CgCtGcgagtctGGtatGAACCATTGTCTTTCCCTAGCGGATTTCAAGAGATCCGCTAGGAAAGACAATGGTGTTTTTGct  
cgagctggcgaattcc  
>CD\_NM\_005018:344  
CgCtGcgagtctGGtatGATGCCGCTTCCGTGTCACACAATTTCAAGAGATTTGTTGACACGGAAGCGGCAGTTTTTgct  
cgagctggcgaattcc  
>CD\_NM\_005018:255  
CgCtGcgagtctGGtatGCTCGTGCTAAACTGGTACCGCATTTCAAGAGATGCGGTACCAGTTTAGCACGAATTTTTGct  
cgagctggcgaattcc  
>CD\_NM\_005018:714  
CgCtGcgagtctGGtatGATGCCTGTGTTCTCTGTGGACTTTCAAGAGAAGTCCACAGAGAACACAGGCACTTTTTgct  
cgagctggcgaattcc  
>CD\_NM\_005018.1:244  
CgCtGcgagtctGGtatGCTCGGAGAGCTTCGTGCTAAACTTTCAAGAGAGTTTAGCACGAAGCTCTCCGATTTTTTgct  
cgagctggcgaattcc  
>CD\_NM\_005018.1:255  
CgCtGcgagtctGGtatGCCGTGCTAAACTGGTACCGCATTTCAAGAGAATGCGGTACCAGTTTAGCACGAATTTTTGct  
cgagctggcgaattcc  
>CD\_NM\_005018.1:815

CgCctGcgagtctGGtatGCCATTGTCTTTCCTAGCGGAATTCAAGAGATTCGGCTAGGAAAGACAATGGTTTTTTGct  
cgagctggcgaattcc  
>CD\_NM\_005018.1:709  
CgCctGcgagtctGGtatGCGCCGTGCTGTGTTCTCTGTGTTCAAGAGACACAGAGAACACAGGCACGGCTTTTTTTGct  
cgagctggcgaattcc  
>CD\_NM\_005018.1:344  
CgCctGcgagtctGGtatGCGCCGCTTCCGTGTACACAACCTCAAGAGAGTTGTGTGACACGGAAGCGGCATTTTTTGct  
cgagctggcgaattcc  
>CD\_NM\_005018.1:489  
CgCctGcgagtctGGtatGCGCTCAGGGTGACAGAGAGAAGTTCAAGAGACTTCTCTCTGTACCCCTGAGCTTTTTTTGct  
cgagctggcgaattcc  
>CD\_NM\_005018.1:886  
CgCctGcgagtctGGtatGCGCCCAGCCACTGAGGCCTGAGTTCAAGAGACTCAGGCCTCAGTGGCTGGGCATTTTTTGct  
cgagctggcgaattcc  
>CD\_NM\_005018.1:800  
CgCctGcgagtctGGtatGAAGACGGAGTATGCCACCATTGTTCAAGAGACAATGGTGGCATACTCCGTCTGTTTTTTGct  
cgagctggcgaattcc  
>CD\_NM\_005018.1:810  
CgCctGcgagtctGGtatGCTGCCACCATTGTCTTTCCTAGTTCAAGAGACTAGGAAAGACAATGGTGGCATACTCCGTCTGTTTTTTGct  
cgagctggcgaattcc  
>CD\_NM\_005018.1:184  
CgCctGcgagtctGGtatGCGCCCTGCTCGTGGTGACCGAATTCAAGAGATTCGGTCACCACGAGCAGGGCTTTTTTTGct  
cgagctggcgaattcc  
>CD\_NM\_005018.1:225  
CgCctGcgagtctGGtatGACTGCAGCTTCTCCAACACATCTTCAAGAGAGATGTGTTGGAGAAGCTGCAGGTTTTTTGct  
cgagctggcgaattcc  
>CD\_NM\_005018.1:783  
CgCctGcgagtctGGtatGCGCCCTGTGTCCCTGAGCAGACTTCAAGAGAGTCTGCTCAGGGACACAGGGCATTTTTTTGct  
cgagctggcgaattcc  
>CD\_NM\_005018.1:890  
CgCctGcgagtctGGtatGAAGCCACTGAGGCCTGAGGATGTTCAAGAGACATCCTCAGGCCTCAGTGGCTGTTTTTTGct  
cgagctggcgaattcc  
>CD\_NM\_005018.1:802  
CgCctGcgagtctGGtatGAACGGAGTATGCCACCATTGTCTTCAAGAGAGACAATGGTGGCATACTCCGTCTTTTTTTGct  
cgagctggcgaattcc  
>CD\_NM\_005018.1:231  
CgCctGcgagtctGGtatGACTTCTCCAACACATCGGAGAGTTCAAGAGACTCTCCGATGTGTTGGAGAAGCTTTTTTTGct  
cgagctggcgaattcc  
>CD\_NM\_005018.1:372  
CgCctGcgagtctGGtatGCCGGGCGTGACTTCCACATGAGTTCAAGAGACTCATGTGGAAGTCACGCCCGTTTTTTGct  
cgagctggcgaattcc  
>CD\_NM\_005018.1:292  
CgCctGcgagtctGGtatGAACGGACAAGCTGGCCGCCTTCTTCAAGAGAGAAGGCGGCCAGCTTGTCCGTCTTTTTTTGct  
cgagctggcgaattcc  
>CD\_NM\_005018.1:787  
CgCctGcgagtctGGtatGATGTGTCCCTGAGCAGACGGAGTTCAAGAGACTCCGTCTGCTCAGGGACACAGTTTTTTGct  
cgagctggcgaattcc  
>CD\_NM\_005018.1:744  
CgCctGcgagtctGGtatGCGGATTTCCAGTGGCGAGAGAATTCAAGAGATTCCTCTCGCCACTGGAAATCCATTTTTTTGct  
cgagctggcgaattcc  
>CD\_NM\_005018.1:781  
CgCctGcgagtctGGtatGAGTGCCCTGTGTCCCTGAGCAGTTCAAGAGACTGCTCAGGGACACAGGGCAGTTTTTTGct  
cgagctggcgaattcc  
>CD\_NM\_005018.1:616

CgCctGcgagtctGGtatGACTAGTCTGGGTCCTGGCCGTCTTCAAGAGAGACGGCCAGGACCCAGACTAGCTTTTTTGct  
cgagctggcgaattcc  
>CD\_NM\_005018.1:339  
CgCctGcgagtctGGtatGCGGACTGCCGCTTCCGTGTCACTTCAAGAGAGTGACACGGAAGCGGCAGTCCTTTTTTGct  
cgagctggcgaattcc  
>CD\_NM\_005018.1:484  
CgCctGcgagtctGGtatGAGCAGAGCTCAGGGTGACAGAGTTCAAGAGACTCTGTACCCCTGAGCTCTGCCTTTTTTGct  
cgagctggcgaattcc  
>CD\_NM\_005018.1:346  
CgCctGcgagtctGGtatGACGCTTCCGTGTACACAACCTGTTCAAGAGACAGTTGTGTGACACGGAAGCGGTTTTTGct  
cgagctggcgaattcc  
>CD\_NM\_005018.1:548  
CgCctGcgagtctGGtatGCGGCCAGCCGGCCAGTTCCAAATTCAGAGATTTGGAAGTGGCCGGCTGGCCTTTTTTGct  
cgagctggcgaattcc  
>CD\_NM\_005018.1:94  
CgCctGcgagtctGGtatGCGTCGTCTGGGCGGTGCTACAATTCAGAGATTTGTAGCACCGCCAGACGACTTTTTTGct  
cgagctggcgaattcc  
>CD\_NM\_005018.1:414  
CgCctGcgagtctGGtatGCTGACAGCGGCACCTACCTCTGTTCAAGAGACAGAGGTAGGTGCCGCTGTCATTTTTTGct  
cgagctggcgaattcc  
>CD\_NM\_005018.1:341  
CgCctGcgagtctGGtatGAACTGCCGCTTCCGTGTCACTTCAAGAGAGTGTGACACGGAAGCGGCAGTCCTTTTTTGct  
cgagctggcgaattcc  
>CD\_NM\_005018.1:469  
CgCctGcgagtctGGtatGAAAAGAGAGCCTGCGGGCAGAGTTCAAGAGACTCTGCCCGCAGGCTCTCTTTGTTTTTGct  
cgagctggcgaattcc  
>CD\_NM\_006039:2333  
CgCctGcgagtctGGtatGAGCGTAGGGTCTCTTACCACATTCAGAGATGTGGTAAGAGAACCCTACGCCTTTTTTGct  
cgagctggcgaattcc  
>CD\_NM\_006039:2746  
CgCctGcgagtctGGtatGCTGGACAGATGGTTCATTATATTCAGAGATATAATGGAACCATCTGTCCATTTTTTGct  
cgagctggcgaattcc  
>CD\_NM\_006039:353  
CgCctGcgagtctGGtatGCCGGCCTCCCTGGGCATGTATGTTCAAGAGACATACATGCCAGGGAGGCCGTTTTTGct  
cgagctggcgaattcc  
>CD\_NM\_006039:3192  
CgCctGcgagtctGGtatGCGGAGCCTTTGATGTATGCCAATTCAGAGATTTGGCATAACATCAAAGGCTCCTTTTTTGct  
cgagctggcgaattcc  
>CD\_NM\_006039:4441  
CgCctGcgagtctGGtatGAATCCTGGTGTGACACATGGAATTCAGAGATTCATGTCTGACACCAGGATGTTTTTGct  
cgagctggcgaattcc  
>CD\_NM\_006039:849  
CgCctGcgagtctGGtatGCGGGTGCGGATCTGCTGAGCATTTCAGAGAAATGCTCAGCAGATCCGCACCCTTTTTTGct  
cgagctggcgaattcc  
>CD\_NM\_006039:2895  
CgCctGcgagtctGGtatGCGCGCAGCAACGTCACCAAAGATTCAGAGATCTTTGGTGACGTTGCTGCGCTTTTTTGct  
cgagctggcgaattcc  
>CD\_NM\_006039:575  
CgCctGcgagtctGGtatGCTCCAGGGAACTCCCACGGAATTCAGAGATTCGGTGGGAGTTCCCTGGATTTTTTGct  
cgagctggcgaattcc  
>CD\_NM\_006039.2:2748  
CgCctGcgagtctGGtatGAACAGATGGTTCATTATAAACTTCAAGAGAGTTTATAATGGAACCATCTGTCTTTTTTGct  
cgagctggcgaattcc  
>CD\_NM\_006039.2:575

CgCtGcgagtctGGtatGCCAGGGAACTCCCACGGAAATTCAGAGATTTCCGTGGGAGTTTCCCTGGATTTTTGct  
cgagctggcgaattcc  
>CD\_NM\_006039.2:1106  
CgCtGcgagtctGGtatGCGCCCTATGTGTGCAAGAAGAATTCAGAGATTTCTTCTTGCACACATAGGGCATTTTTGct  
cgagctggcgaattcc  
>CD\_NM\_006039.2:2103  
CgCtGcgagtctGGtatGATCAGAGCGGCTGCAGGACAAGTTCAAGAGACTTGTCTGCAGCCGCTCTGAGTTTTTGct  
cgagctggcgaattcc  
>CD\_NM\_006039.2:1164  
CgCtGcgagtctGGtatGATGGGCCAATGTGAAGGTGGAGTTCAAGAGACTCCACCTTACATTGGCCCACTTTTTGct  
cgagctggcgaattcc  
>CD\_NM\_006039.2:849  
CgCtGcgagtctGGtatGAGGTGCGGATCTGCTGAGCATTTCAAGAGAGATGCTCAGCAGATCCGCACCCTTTTTGct  
cgagctggcgaattcc  
>CD\_NM\_006039.2:3945  
CgCtGcgagtctGGtatGAGTCTGTCTATCCTGGATGAGTTCAAGAGACTCATCCAGGATAGACAGGACGTTTTGct  
cgagctggcgaattcc  
>CD\_NM\_006039.2:3984  
CgCtGcgagtctGGtatGATGGGAGCACCTGCAGAGCTATTTCAAGAGAATAGCTCTGCAGGTGCTCCAGTTTTGct  
cgagctggcgaattcc  
>CD\_NM\_006039.2:3639  
CgCtGcgagtctGGtatGATCAGAGGAGCCGCTGAACTACTTCAAGAGAGTAGTTTCAGCGGCTCCTCTGAGTTTTGct  
cgagctggcgaattcc  
>CD\_NM\_006039.2:4136  
CgCtGcgagtctGGtatGACCACAACAGCTGCTACTGGATTTCAAGAGAATCCAGTAGCAGCTGTTGTGGCTTTTTGct  
cgagctggcgaattcc  
>CD\_NM\_006039.2:2746  
CgCtGcgagtctGGtatGCGGACAGATGGTTCATTATAATTCAGAGATTATAATGGAACCATCTGTCCATTTTTGct  
cgagctggcgaattcc  
>CD\_NM\_006039.2:3447  
CgCtGcgagtctGGtatGAACCTTCCGGCTGCTTCAGAAGTTCAAGAGACTTCTGAAGCAGCCGGAAGGTTTTTGct  
cgagctggcgaattcc  
>CD\_NM\_006039.2:2227  
CgCtGcgagtctGGtatGCAGATCTTCGGTGAATCAGAACTTCAAGAGAGTTCTGATTCACCGAAGATTTTTTTGct  
cgagctggcgaattcc  
>CD\_NM\_006039.2:4203  
CgCtGcgagtctGGtatGAACCATGGGTGTCGTCTGCAAGTTCAAGAGACTTGCAGACGACACCCATGGTGTTTTTGct  
cgagctggcgaattcc  
>CD\_NM\_006039.2:367  
CgCtGcgagtctGGtatGCTGTATGAGTGTGACCGGGAAGTTCAAGAGACTTCCCGGTCACACTCATACATTTTTGct  
cgagctggcgaattcc  
>CD\_NM\_006039.2:4053  
CgCtGcgagtctGGtatGCGGAGGCACTCTGGTCTGGCAGTTCAAGAGACTGCCAGACCAGAGTGCTCCTTTTTGct  
cgagctggcgaattcc  
>CD\_NM\_006039.2:3043  
CgCtGcgagtctGGtatGAAGTTCTCCTGTGAACAGCAAGTTCAAGAGACTTGCTGTTTACAGGAGAACTTTTTGct  
cgagctggcgaattcc  
>CD\_NM\_006039.2:2879  
CgCtGcgagtctGGtatGCGCCCTACATCTGCAAGCGCAGTTCAAGAGACTGCGCTTGCAGATGTAGGGCATTTTTGct  
cgagctggcgaattcc  
>CD\_NM\_006039.2:3954  
CgCtGcgagtctGGtatGCATCCTGGATGAGATGGAGAATTTCAAGAGAATTTCCATCTCATCCAGGATTTTTGct  
cgagctggcgaattcc  
>CD\_NM\_006039.2:387



CgCctGcgagtctGGtatGCGCACTGAATCTTCGCTGGCATTTC AAGAGAATGCCAGCGAAGATTCAGTGCTTTTTTGGct  
cgagctggcgaattcc  
>CD\_NM\_006039.2:788  
CgCctGcgagtctGGtatGCCAGTTTAACTTCCAGTCCACTTCAAGAGAGTGGACTGGAAGTTAACTGGTTTTTGGct  
cgagctggcgaattcc  
>CD\_NM\_006039.2:4310  
CgCctGcgagtctGGtatGCGCTGCTCCTGGCCTTGCTGACTTCAAGAGAGTCAGCAAGGCCAGGAGCAGCATTTTTTGGct  
cgagctggcgaattcc  
>CD\_NM\_006039.2:2658  
CgCctGcgagtctGGtatGAAGCCACAACCTTGCAGAAGTTCTTCAAGAGAGA ACTTCTGCAAGTTGTGGCTTTTTTGGct  
cgagctggcgaattcc  
>CD\_NM\_006039.2:2208  
CgCctGcgagtctGGtatGCGTGGCCAACATGCTCAACAAGTTCAAGAGACTTGTGAGCATGTTGGCCACATTTTTGGct  
cgagctggcgaattcc  
>CD\_NM\_006039.2:3113  
CgCctGcgagtctGGtatGAAGCCAGCCTGCCAATGTGACTTCAAGAGAGTCACATTGGGCAGGCTGGCTTTTTTGGct  
cgagctggcgaattcc  
>CD\_NM\_003263:294  
CgCctGcgagtctGGtatGCTGCCATTATCTTCATGTTAATTTCAAGAGAATTAACATGAAGATAATGGCAATTTTTGGct  
cgagctggcgaattcc  
>CD\_NM\_003263:375  
CgCctGcgagtctGGtatGCCGGTCTCATCCACGTTCTTAATTCAAGAGATTAGGAACGTGGATGAGACCGTTTTTGGct  
cgagctggcgaattcc  
>CD\_NM\_003263:623  
CgCctGcgagtctGGtatGCAGCACTTGGACCTGTCAATTTATTCAAGAGATAAATGACAGGTCCAAGTGCTTTTTGGct  
cgagctggcgaattcc  
>CD\_NM\_003263:645  
CgCctGcgagtctGGtatGCTGCATTTGATGCCCTGCCTATTTCAAGAGAATAGGCAGGGCATCAAATGCATTTTTTGGct  
cgagctggcgaattcc  
>CD\_NM\_003263:1315  
CgCctGcgagtctGGtatGCAGCCCGTTCCTGCATTTGGATTTCAAGAGAATCCAAATGCAGGAACGGGCTATTTTTGGct  
cgagctggcgaattcc  
>CD\_NM\_003263:2378  
CgCctGcgagtctGGtatGATCCAGAGTGAATGGTGCCATTTTCAAGAGAAATGGCACCATTCACTCTGGACTTTTTTGGct  
cgagctggcgaattcc  
>CD\_NM\_003263:1521  
CgCctGcgagtctGGtatGCAGGAGACTGTTCTTGACTAATTTCAAGAGATTAGTCCAAGAACAGTCTCCTTTTTTGGct  
cgagctggcgaattcc  
>CD\_NM\_003263.3:293  
CgCctGcgagtctGGtatGCTGCCATTATCTTCATGTTAATTTCAAGAGAATTAACATGAAGATAATGGCAATTTTTGGct  
cgagctggcgaattcc  
>CD\_NM\_003263.3:1338  
CgCctGcgagtctGGtatGCTCCAATAATCTCTTAACAGACTTCAAGAGAGTCTGTTAAGAGATTATGGAATTTTTGGct  
cgagctggcgaattcc  
>CD\_NM\_003263.3:1097  
CgCctGcgagtctGGtatGCTTTCTCAATTTCAAACGTGAATTCAAGAGATTCACGTTTGAAATTGAGAAATTTTTGGct  
cgagctggcgaattcc  
>CD\_NM\_003263.3:1991  
CgCctGcgagtctGGtatGATGAATTATCCTGCAACATAACTTCAAGAGAGTTATGTTGCAGGATAATTCAGTTTTTGGct  
cgagctggcgaattcc  
>CD\_NM\_003263.3:1006  
CgCctGcgagtctGGtatGCAGTTATCAAATCTTACCTTAATTTCAAGAGATTAAGGTAAGATTTGATAACTTTTTTGGct  
cgagctggcgaattcc  
>CD\_NM\_003263.3:919

CgCtGcgagtctGGtatGATGGAACATCTAATATCAAATTTCAAGAGAATTTGATATTAGATAGTTCAGTTTTTGct  
cgagctggcgaattcc  
>CD\_NM\_003263.3:837  
CgCtGcgagtctGGtatGAACTGAGAGTCTGCACATTGTGTTCAAGAGACACAATGTGCAGACTCTCAGTGTGTTTTGct  
cgagctggcgaattcc  
>CD\_NM\_003263.3:677  
CgCtGcgagtctGGtatGCTGGCAATATGTCCTCAACTAAATTTCAAGAGATTTAGTTGAGACATATTGCCAATTTTTGct  
cgagctggcgaattcc  
>CD\_NM\_003263.3:2415  
CgCtGcgagtctGGtatGACATCACAATCTCTTTCATGAATTTCAAGAGATTCATGAAAGAGATTGTGATGGTTTTGct  
cgagctggcgaattcc  
>CD\_NM\_003263.3:1938  
CgCtGcgagtctGGtatGATGTGACTACCCGGAAAGTTATTTCAAGAGAATAACTTTCCGGGTAGTCACACTTTTTGct  
cgagctggcgaattcc  
>CD\_NM\_003263.3:1921  
CgCtGcgagtctGGtatGCGGCCTGATCTTATAAGTGTGTTCAAGAGACACACTTATAAGAATCAGGCCATTTTTGct  
cgagctggcgaattcc  
>CD\_NM\_003263.3:1945  
CgCtGcgagtctGGtatGCACCCGGAAAGTTATAGAGGAATTTCAAGAGATTCCTCTATAACTTTCCGGGTATTTTTGct  
cgagctggcgaattcc  
>CD\_NM\_003263.3:2154  
CgCtGcgagtctGGtatGATTAGAAGAACTCCAAAGAAATTTCAAGAGAATTTCTTTGGAGTTCTTCTAAGTTTTGct  
cgagctggcgaattcc  
>CD\_NM\_003263.3:1617  
CgCtGcgagtctGGtatGAGTACTTGATCTTCACAGCAATTTCAAGAGAATTGCTGTGAAGATCAAGTACTTTTGct  
cgagctggcgaattcc  
>CD\_NM\_003263.3:2419  
CgCtGcgagtctGGtatGAACAATCTCTTTCATGAAGGATTTCAAGAGAATCCTTCATGAAAGAGATTGTGTTTTGct  
cgagctggcgaattcc  
>CD\_NM\_003263.3:656  
CgCtGcgagtctGGtatGACCTGCCTATATGCAAAGAGTTTTCAAGAGAACTCTTTGCATATAGGCAGGGTTTTGct  
cgagctggcgaattcc  
>CD\_NM\_003263.3:461  
CgCtGcgagtctGGtatGATGACATCTTATCACTGTCAAATTTCAAGAGATTTGACAGTGATAAGATGTCAGTTTTGct  
cgagctggcgaattcc  
>CD\_NM\_003263.3:609  
CgCtGcgagtctGGtatGCACTGTGAACCTCAAGCACTTGTTCAAGAGACAAGTGCTTGAGGTTACAGTATTTTTGct  
cgagctggcgaattcc  
>CD\_NM\_003263.3:2367  
CgCtGcgagtctGGtatGCCCCAACTTTGTCCAGAGTGAATTTCAAGAGATTCCTCTGGACAAAGTTGGGATTTTTGct  
cgagctggcgaattcc  
>CD\_NM\_003263.3:981  
CgCtGcgagtctGGtatGCCTGGCGAACTTCAAACAAATTTCAAGAGAATTTGTTTGAAGTTTCGCCAGATTTTTGct  
cgagctggcgaattcc  
>CD\_NM\_003263.3:2214  
CgCtGcgagtctGGtatGCTCTTCTGGGTGAAGAATGAATTTCAAGAGATTCATCTTCACCCAGAAAGAATTTTTGct  
cgagctggcgaattcc  
>CD\_NM\_003263.3:2378  
CgCtGcgagtctGGtatGCCCAGAGTGAATGGTGCCATTATTTCAAGAGATAATGGCACCATTCACTCTGGATTTTTGct  
cgagctggcgaattcc  
>CD\_NM\_003263.3:1811  
CgCtGcgagtctGGtatGACCAGAAGATGAGGTCAATAAATTTCAAGAGATTTATTGACCTCATCTTCTGGCTTTTTGct  
cgagctggcgaattcc  
>CD\_NM\_003263.3:960

CgCctGcgagtctGGtatGCTGTTCTTACTTCCCTAAGTATTTTCAAGAGAAATACTTAGGAAGTAAGAACATTTTTTGct  
cgagctggcgaattcc  
>CD\_NM\_003263.3:2611  
CgCctGcgagtctGGtatGATGACAGAGCAAGCAAAGAAATTTCAAGAGAAATTTCTTTGCTTGCTCTGTCAGTTTTTGct  
cgagctggcgaattcc  
>CD\_NM\_003263.3:1915  
CgCctGcgagtctGGtatGAAGGGCTGGCCTGATTCTTATATTCAAGAGATATAAGAATCAGGCCAGCCCTTTTTTGct  
cgagctggcgaattcc  
>CD\_NM\_003264.3:2312  
CgCctGcgagtctGGtatGCACTGTCTTTGTGCTTTCTGAATTCAAGAGATTCAGAAAGCACAAAGACAGTTTTTTTGct  
cgagctggcgaattcc  
>CD\_NM\_003264.3:526  
CgCctGcgagtctGGtatGCACATTTAGACTTATCCTATAATTCAAGAGATTATAGGATAAGTCTAAATGTTTTTTTGct  
cgagctggcgaattcc  
>CD\_NM\_003264.3:1962  
CgCctGcgagtctGGtatGATGTGCGAATGTCACAGGACAGTTCAAGAGACTGTCCTGTGACATTCGACACTTTTTTGct  
cgagctggcgaattcc  
>CD\_NM\_003264.3:1203  
CgCctGcgagtctGGtatGCGCACTTTATATTCACTTACAGTTCAAGAGACTGTAAGTGAATATAAAGTGCTTTTTTTGct  
cgagctggcgaattcc  
>CD\_NM\_003264.3:1905  
CgCctGcgagtctGGtatGATGTGTGACTCTCCATCCCATGTTCAAGAGACATGGGATGGAGAGTCACACAGTTTTTTGct  
cgagctggcgaattcc  
>CD\_NM\_003264.3:2408  
CgCctGcgagtctGGtatGCGCTGCCATTCTCATTCTTCTGTTCAAGAGACAGAAGAATGAGAATGGCAGCATTTTTTGct  
cgagctggcgaattcc  
>CD\_NM\_003264.3:1109  
CgCctGcgagtctGGtatGCTCTGATAATGACAGAGTTATATTCAAGAGATATAACTCTGTCAATTATCAGATTTTTTTGct  
cgagctggcgaattcc  
>CD\_NM\_003264.3:1768  
CgCctGcgagtctGGtatGCGCAACTTGACTCATTTCACACTTCAAGAGAGTGTGAAATGAGTCAAGTTGCTTTTTTTGct  
cgagctggcgaattcc  
>CD\_NM\_003264.3:731  
CgCctGcgagtctGGtatGCGGACTTACCTTCCCTTGAGGAATTTCAAGAGATTCCTCAAGGAAGGTAAGTCCATTTTTTGct  
cgagctggcgaattcc  
>CD\_NM\_003264.3:1133  
CgCctGcgagtctGGtatGCCAGGTAAAGTGGAACGTTATTCAAGAGATAACGTTTCCACTTTACCTGGATTTTTTTGct  
cgagctggcgaattcc  
>CD\_NM\_003264.3:2261  
CgCctGcgagtctGGtatGCGGCAAGTGGATCATTGACAATTTCAAGAGAAATGTCAATGATCCACTTGCCATTTTTTTGct  
cgagctggcgaattcc  
>CD\_NM\_003264.3:1433  
CgCctGcgagtctGGtatGAGGAGAGACTTTGCTCACTCTGTTCAAGAGACAGAGTGAGCAAAGTCTCTCCGTTTTTTGct  
cgagctggcgaattcc  
>CD\_NM\_003264.3:1079  
CgCctGcgagtctGGtatGCACCTTAATGGAGTTGGTAATTTCAAGAGAAATACCAACTCCATTAAGGGTATTTTTTTGct  
cgagctggcgaattcc  
>CD\_NM\_003264.3:2053  
CgCctGcgagtctGGtatGCCATGGCCTGTGGTATATGAATTCAAGAGATTCATATACCACAGGCCATGGATTTTTTTGct  
cgagctggcgaattcc  
>CD\_NM\_003264.3:460  
CgCctGcgagtctGGtatGCGGTGCTGACATCCAATGGAATTTCAAGAGAAATTCATTGGATGTCAGCACCATTTTTTTGct  
cgagctggcgaattcc  
>CD\_NM\_003264.3:1781

CgCctGcgagtctGGtatGCTTTCACACACTGAAGACTTTGTTCAAGAGACAAAGTCTTCAGTGTGTGAAATTTTTTtGct  
cgagctggcgaattcc  
>CD\_NM\_003264.3:1868  
CgCctGcgagtctGGtatGCCTGGCCAAAGTCTTGATTGATTTCAAGAGAATCAATCAAGACTTTGGCCAGTTTTTTtGct  
cgagctggcgaattcc  
>CD\_NM\_003264.3:598  
CgCctGcgagtctGGtatGAATTCTTAAACTTACTGGGAAATTC AAGAGATTTCCAGTAAGTTTAAGAATTTTTTtGct  
cgagctggcgaattcc  
>CD\_NM\_003264.3:815  
CgCctGcgagtctGGtatGCGTAAGTCATCTGATCCTTCATTTCAAGAGAATGAAGGATCAGATGACTTACATTTTTTtGct  
cgagctggcgaattcc  
>CD\_NM\_003264.3:1819  
CgCctGcgagtctGGtatGCCTTCATTTGCTCCTGTGAATTTTCAAGAGAAATTCACAGGAGCAAATGAAGTTTTTTtGct  
cgagctggcgaattcc  
>CD\_NM\_003264.3:818  
CgCctGcgagtctGGtatGCAGTCATCTGATCCTTCATATGTTCAAGAGACATATGAAGGATCAGATGACTTTTTTTtGct  
cgagctggcgaattcc  
>CD\_NM\_003264.3:1264  
CgCctGcgagtctGGtatGCTCTGGTTCCTTGTTTACTTTCTTCAAGAGAGAAAGTAAACAAGGAACCAGAATTTTTTtGct  
cgagctggcgaattcc  
>CD\_NM\_003264.3:1369  
CgCctGcgagtctGGtatGCTGCCTGGCCCTCTCTACAAACTTCAAGAGAGTTTGTAGAGAGGGCCAGGCATTTTTTTtGct  
cgagctggcgaattcc  
>CD\_NM\_003264.3:1006  
CgCctGcgagtctGGtatGCTGAAAGTTTGTTTCAGGTTATTTCAAGAGAATAACCTGAAACAAACTTTCATTTTTTTtGct  
cgagctggcgaattcc  
>CD\_NM\_003264.3:455  
CgCctGcgagtctGGtatGAGCTCTGGTGCTGACATCCAATTTCAAGAGAATTGGATGTCAGCACCAGAGCCTTTTTTtGct  
cgagctggcgaattcc  
>CD\_NM\_003264.3:383  
CgCctGcgagtctGGtatGCAGCCTTGACCTGTCCAACAACCTTCAAGAGAGTTGTTGGACAGGTCAAGGCTTTTTTTtGct  
cgagctggcgaattcc  
>CD\_NM\_003264.3:1463  
CgCctGcgagtctGGtatGAACTAACATTGATATCAGTAAGTTCAAGAGACTTACTGATATCAATGTTAGTCTTTTTTtGct  
cgagctggcgaattcc  
>CD\_NM\_003264.3:400  
CgCctGcgagtctGGtatGCCAACAGGATCACCTACATTAGTTCAAGAGACTAATGTAGGTGATCCTGTTGTTTTTTtGct  
cgagctggcgaattcc  
>CD\_NM\_003264.3:1673  
CgCctGcgagtctGGtatGAAGAAATAAGTTGATGACTCTATTCAAGAGATAGAGTCATCAACTTATTTCTGTTTTTTtGct  
cgagctggcgaattcc  
>CD\_NM\_003264.3:2130  
CgCctGcgagtctGGtatGCACATCTGCTATGATGCATTTGTTCAAGAGACAAATGCATCATAGCAGATGTTTTTTtGct  
cgagctggcgaattcc  
>CD\_NM\_003264.3:2423  
CgCctGcgagtctGGtatGCCTTCTGGAGCCATTGAGAAATTC AAGAGATTTCTCAATGGGCTCCAGAAGATTTTTTtGct  
cgagctggcgaattcc  
>CD\_NM\_003264.3:827  
CgCctGcgagtctGGtatGAATCCTTCATATGAAGCAGCATTTC AAGAGAATGCTGCTTCATATGAAGGATTTTTTTtGct  
cgagctggcgaattcc  
>CD\_NM\_003264.3:440  
CgCctGcgagtctGGtatGATGTGTGAACCTCCAGGCTCTGTTCAAGAGACAGAGCCTGGAGGTTACACACTTTTTTtGct  
cgagctggcgaattcc  
>CD\_NM\_003265:301

CgCctGcgagtctGGtatGAAGCCGCCAACTTCACAAGGTATTCAAGAGATACCTTGTGAAGTTGGCGGCTGTTTTTGct  
cgagctggcgaattcc  
>CD\_NM\_003265:429  
CgCctGcgagtctGGtatGAAGCTATCTCAACTTTCTGATATTCAAGAGATATCAGAAAGTTGAGATAGCTCTTTTTTGct  
cgagctggcgaattcc  
>CD\_NM\_003265:524  
CgCctGcgagtctGGtatGCCCTTTGTCAAGCAGAAGAATTTCAAGAGAATTCTTCTGCTTGACAAAGGGATTTTTTGct  
cgagctggcgaattcc  
>CD\_NM\_003265:2063  
CgCctGcgagtctGGtatGCGCCTGGTTTGTTAATTGGATTTTTCAAGAGAAATCCAATTAACAAACCAGGCATTTTTTGct  
cgagctggcgaattcc  
>CD\_NM\_003265:2371  
CgCctGcgagtctGGtatGAAGCATATATAATTCATGCCTATTCAAGAGATAGGCATGAATTATATATGCTGTTTTTGct  
cgagctggcgaattcc  
>CD\_NM\_003265:1903  
CgCctGcgagtctGGtatGCTCCAGCATCTGTCTTTAATAAATTCAAGAGATTATTAAGACAGATGCTGGAATTTTTTGct  
cgagctggcgaattcc  
>CD\_NM\_003265.2:1903  
CgCctGcgagtctGGtatGCCCAGCATCTGTCTTTAATAAATTCAAGAGAATTATTAAGACAGATGCTGGATTTTTTGct  
cgagctggcgaattcc  
>CD\_NM\_003265.2:710  
CgCctGcgagtctGGtatGCTGTCATCGAATCAAATTAAGTTCAAGAGACTTTAATTTGATTTCGATGACAATTTTTTGct  
cgagctggcgaattcc  
>CD\_NM\_003265.2:483  
CgCctGcgagtctGGtatGCCCATCTCATGTCCAACCTCAATTTCAAGAGAATTGAGTTGGACATGAGATGGATTTTTTGct  
cgagctggcgaattcc  
>CD\_NM\_003265.2:1254  
CgCctGcgagtctGGtatGATCTATCCAACCTCTTTACAAGTTCAAGAGACTTGTAAGGAGTTGGATAGACTTTTTTGct  
cgagctggcgaattcc  
>CD\_NM\_003265.2:2682  
CgCctGcgagtctGGtatGCCCATGCACTCTGTTTGCGAAGTTCAAGAGACTTCGCAAACAGAGTGCATGGTTTTTTTGct  
cgagctggcgaattcc  
>CD\_NM\_003265.2:1699  
CgCctGcgagtctGGtatGCATTCTCGATTTGCAGCATAACTTCAAGAGAGTTATGCTGCAAATCGAGAATTTTTTTTGct  
cgagctggcgaattcc  
>CD\_NM\_003265.2:1831  
CgCctGcgagtctGGtatGACCAGTTGAGGTCCTTCAAGGATTTCAAGAGAATCCTTGAAGACCTCAACTGGGTTTTTTTGct  
cgagctggcgaattcc  
>CD\_NM\_003265.2:621  
CgCctGcgagtctGGtatGCAGAGCTTCTATTATCAAACAATTCAAGAGATTGTTTGATAATAGAAGCTCTTTTTTTTGct  
cgagctggcgaattcc  
>CD\_NM\_003265.2:1959  
CgCctGcgagtctGGtatGCTCTCATAACATCCGTTGAGAATTCAAGAGATTCTCAACGGATGTTATGAGATTTTTTTTGct  
cgagctggcgaattcc  
>CD\_NM\_003265.2:2688  
CgCctGcgagtctGGtatGAACTCTGTTTGCGAAGAGGAATTTCAAGAGAATTCCTCTTCGCAAACAGAGTGTTTTTTGct  
cgagctggcgaattcc  
>CD\_NM\_003265.2:103  
CgCctGcgagtctGGtatGAAGACAGACTTTGCCTTGTATCTTCAAGAGAGATACAAGGCAAAGTCTGTCTTTTTTTTGct  
cgagctggcgaattcc  
>CD\_NM\_003265.2:478  
CgCctGcgagtctGGtatGCGAACTCCATCTCATGTCCAACCTTCAAGAGAGTTGGACATGAGATGGAGTTCATTTTTTGct  
cgagctggcgaattcc  
>CD\_NM\_003265.2:1939

CgCctGcgagtctGGtatGATCATTGAACCTTCAGAAGAATTTCAAGAGAATTCTTCTGAAGGTTCAATGACTTTTTTGct  
cgagctggcgaattcc  
>CD\_NM\_003265.2:2357  
CgCctGcgagtctGGtatGAAGTTTGAATATGCAGCATATATTCAAGAGATATATGCTGCATATTCAAACGTTTTTGct  
cgagctggcgaattcc  
>CD\_NM\_003265.2:1673  
CgCctGcgagtctGGtatGCTGTTGGAGGGTCTTGAGAACTTCAAGAGAGTTTCTCAAGACCTCCAACATTTTTTGct  
cgagctggcgaattcc  
>CD\_NM\_003265.2:1312  
CgCctGcgagtctGGtatGCGCTCATTCTCCCTTACACATATTCAAGAGATATGTGTAAGGGAGAATGAGCATTTTTTGct  
cgagctggcgaattcc  
>CD\_NM\_003265.2:2068  
CgCctGcgagtctGGtatGATTTGTTAATTGGATTAACGAGTTCAAGAGACTCGTTAATCCAATTAACAACTTTTTTGct  
cgagctggcgaattcc  
>CD\_NM\_003265.2:2320  
CgCctGcgagtctGGtatGCGTTCTTGGTTTCAAAGAAATATTCAAGAGATATTTCTTTGAAACCAAGAACTTTTTTGct  
cgagctggcgaattcc  
>CD\_NM\_003265.2:705  
CgCctGcgagtctGGtatGCAGAGTTGTCATCGAATCAAATTTCAAGAGAATTTGATTCGATGACAACTCTATTTTTGct  
cgagctggcgaattcc  
>CD\_NM\_003265.2:301  
CgCctGcgagtctGGtatGCGCCGCAACTTCACAAGGTATTTCAAGAGAATACCTTGTGAAGTTGGCGGCTTTTTTGct  
cgagctggcgaattcc  
>CD\_NM\_003265.2:772  
CgCctGcgagtctGGtatGCGGCCTCTTTCTGAACAATGTCTTCAAGAGAGACATTGTTTCAGAAAGAGGCCATTTTTTGct  
cgagctggcgaattcc  
>CD\_NM\_003265.2:2315  
CgCctGcgagtctGGtatGAATCGAGTTCTTGGTTTCAAAGTTCAAGAGACTTTGAAACCAAGAACTCGATGTTTTTGct  
cgagctggcgaattcc  
>CD\_NM\_003265.2:235  
CgCctGcgagtctGGtatGCCCCGATGATCTACCCACAACTTCAAGAGAGTTTGTGGGTAGATCATCGGGTTTTTGct  
cgagctggcgaattcc  
>CD\_NM\_003265.2:750  
CgCctGcgagtctGGtatGCTCACGCAATTGGAAGATTATTTTCAAGAGAAATAATCTTCCAATTGCGTGAATTTTTGct  
cgagctggcgaattcc  
>CD\_NM\_003265.2:384  
CgCctGcgagtctGGtatGACCAGAACTTCCCATGTTAAATTTCAAGAGATTTAACATGGGAAGTTTCTGGCTTTTTTGct  
cgagctggcgaattcc  
>CD\_NM\_003265.2:1174  
CgCctGcgagtctGGtatGACACCTTAACATGGAAGATAATTTCAAGAGAATTATCTTCCATGTTAAGGTGCTTTTTTGct  
cgagctggcgaattcc  
>CD\_NM\_003265.2:933  
CgCctGcgagtctGGtatGCGCTCGATCTTTCCTACAACAATTTCAAGAGATTGTTGTAGGAAAGATCGAGCATTTTTGct  
cgagctggcgaattcc  
>CD\_NM\_138554.1:3453  
CgCctGcgagtctGGtatGATCACTCGATGTCATTCCAAAGTTCAAGAGACTTTGGAATGACATCGAGTGACTTTTTGct  
cgagctggcgaattcc  
>CD\_NM\_138554.1:3739  
CgCctGcgagtctGGtatGCCCTCTGAATCTCTTTAGGGAGTTCAAGAGACTCCCTAAAGAGATTCAGAGGTTTTTGct  
cgagctggcgaattcc  
>CD\_NM\_138554.1:77  
CgCctGcgagtctGGtatGACCTCAGAACTGCTCGGTCAGTTCAAGAGACTGACCGAGCAGTTTCTGAGGCTTTTTGct  
cgagctggcgaattcc  
>CD\_NM\_138554.1:250

CgCctGcgagtctGGtatGATGCGTGGAGGTGGTTCCTAATTTCAAGAGAATTAGGAACCACCTCCACGCAGTTTTTGGct  
cgagctggcgaattcc  
>CD\_NM\_138554.1:1798  
CgCctGcgagtctGGtatGATCCCTCCAGGTTCTTGATTACTTCAAGAGAGTAATCAAGAACCTGGAGGGAGTTTTTGGct  
cgagctggcgaattcc  
>CD\_NM\_138554.1:3208  
CgCctGcgagtctGGtatGCAGTGGCTAATTCCTAAGGAAATTCAGAGATTTCTTAGGAATTAGCCACTATTTTTGGct  
cgagctggcgaattcc  
>CD\_NM\_138554.1:474  
CgCctGcgagtctGGtatGCCCTCTCTACCTTAATATTGACTTCAAGAGAGTCAATATTAAGGTAGAGAGGTTTTTGGct  
cgagctggcgaattcc  
>CD\_NM\_138554.1:210  
CgCctGcgagtctGGtatGCGGCCTTCTCTCCTGCGTGAGTTCAAGAGACTCACGCAGGAGAGGAAGGCCATTTTTGGct  
cgagctggcgaattcc  
>CD\_NM\_138554.1:818  
CgCctGcgagtctGGtatGCTCCAACCAGGTGCATTTAAAGTTCAAGAGACTTTAAATGCACCTGGTTGGATTTTTTGGct  
cgagctggcgaattcc  
>CD\_NM\_138554.1:996  
CgCctGcgagtctGGtatGCAGAGGGCCTGTGCAATTTGACTTCAAGAGAGTCAAATTGCACAGGCCCTCTATTTTTGGct  
cgagctggcgaattcc  
>CD\_NM\_138554.1:3715  
CgCctGcgagtctGGtatGCTCAGAACAAGTGATGTTTGATTTCAAGAGAATCAAACATCACTTGTTCTGAATTTTTTGGct  
cgagctggcgaattcc  
>CD\_NM\_138554.1:3347  
CgCctGcgagtctGGtatGCGCCTATAAGCTAATATCATAATTCAGAGATTATGATATTAGCTTATAGGCATTTTTTGGct  
cgagctggcgaattcc  
>CD\_NM\_138554.1:2939  
CgCctGcgagtctGGtatGATCATTTCACCTCTTACCTCATTTCAGAGAAATGAGGTAAGAGTTGAAATGACTTTTTTGGct  
cgagctggcgaattcc  
>CD\_NM\_138554.1:1549  
CgCctGcgagtctGGtatGCGCTTTCAATGGCATCTTCAATTTCAAGAGAATTGAAGATGCCATTGAAAGCATTTTTTGGct  
cgagctggcgaattcc  
>CD\_NM\_138554.1:772  
CgCctGcgagtctGGtatGACTACTCAATCTCTCTTTAGACTTCAAGAGAGTCTAAAGAGAGATTGAGTAGGTTTTTGGct  
cgagctggcgaattcc  
>CD\_NM\_138554.1:2320  
CgCctGcgagtctGGtatGCGCTGCCAACATCATCCATGAATTCAGAGATTCATGGATGATGTTGGCAGCATTTTTTGGct  
cgagctggcgaattcc  
>CD\_NM\_138554.1:3568  
CgCctGcgagtctGGtatGCCCTGGTCTTATCATGGACAATTTCAAGAGAATTGTCCATGATAAGACCAGGATTTTTTGGct  
cgagctggcgaattcc  
>CD\_NM\_138554.1:13  
CgCctGcgagtctGGtatGCGCCCAGAACTGCTTTGAATACTTCAAGAGAGTATTCAAAGCAGTTCTGGGCTTTTTTGGct  
cgagctggcgaattcc  
>CD\_NM\_138554.1:635  
CgCctGcgagtctGGtatGATGGCTCACAATCTTATCCAATTTCAAGAGAATTGGATAAGATTGTGAGCCACTTTTTTGGct  
cgagctggcgaattcc  
>CD\_NM\_138554.1:1110  
CgCctGcgagtctGGtatGCGGTGAGTGTGACTATTGAAAGTTCAAGAGACTTTCAATAGTCACACTCACCATTTTTTGGct  
cgagctggcgaattcc  
>CD\_NM\_138554.1:2398  
CgCctGcgagtctGGtatGACGCTGGTGTATCTTTGAATATTTCAAGAGAATATCAAAGATACACCAGCGTTTTTGGct  
cgagctggcgaattcc  
>CD\_NM\_138554.1:1108

CgCctGcgagtctGGtatGACTGGTGAGTGTGACTATTGAATTCAAGAGATTCAATAGTCACACTCACCAGGTTTTTGct  
cgagctggcgaattcc  
>CD\_NM\_138554.1:2855  
CgCctGcgagtctGGtatGAAGGGAATAAATGCTAGACTAATTCAAGAGATTAGTCTAGCATTATTCCCTCTTTTTGct  
cgagctggcgaattcc  
>CD\_NM\_138554.1:3177  
CgCctGcgagtctGGtatGCTAAGTCTGTCTCCTTACAGAGTTCAAGAGACTCTGTAAGGAGACAGACTTAATTTTTGct  
cgagctggcgaattcc  
>CD\_NM\_138554.1:3457  
CgCctGcgagtctGGtatGATCGATGTCATTCCAAAGTTATTTCAAGAGAATAACTTTGGAATGACATCGAGTTTTTGct  
cgagctggcgaattcc  
>CD\_NM\_138554.1:2077  
CgCctGcgagtctGGtatGAGTCTCAGTGTGCTTGTAGTATTCAAGAGATACTACAAGCACACTGAGGACCTTTTTGct  
cgagctggcgaattcc  
>CD\_NM\_138554.1:1228  
CgCctGcgagtctGGtatGCAGGCTTACTTTCACCTCCAACCTCAAGAGAGTTGGAAGTGAAAGTAAGCCTTTTTTGct  
cgagctggcgaattcc  
>CD\_NM\_138554.1:1875  
CgCctGcgagtctGGtatGATCTAGCTTCTTAAATCTTACTTCAAGAGAGTAAGATTTAAGAAAGCTAGACTTTTTGct  
cgagctggcgaattcc  
>CD\_NM\_138554.1:1294  
CgCctGcgagtctGGtatGATTTCTAGATCTCAGTAGAAATTTCAAGAGAATTTCTACTGAGATCTAGAAACTTTTTGct  
cgagctggcgaattcc  
>CD\_NM\_138554.1:3472  
CgCctGcgagtctGGtatGCAGTTATTGCCACTAAGTAATTTCAAGAGAATTACTTAGTAGGCAATAACTTTTTTGct  
cgagctggcgaattcc  
>CD\_NM\_138554.1:283  
CgCctGcgagtctGGtatGCTGCATGGAGCTGAATTTCTACTTCAAGAGAGTAGAAATTCAGCTCCATGCATTTTTGct  
cgagctggcgaattcc  
>CD\_NM\_138554.1:556  
CgCctGcgagtctGGtatGACTGGTGGCTGTGGAGACAAATTTCAAGAGAATTTGTCTCCACAGCCACCAGCTTTTTGct  
cgagctggcgaattcc  
>CD\_NM\_138554.1:1498  
CgCctGcgagtctGGtatGCTCACTCAGAAACCTCATTTACTTCAAGAGAGTAAATGAGGTTTCTGAGTGATTTTTGct  
cgagctggcgaattcc  
>CD\_NM\_017442.2:1815  
CgCctGcgagtctGGtatGAACTCTGCGTCTGCAGATGAACTTCAAGAGAGTTCATCTGCAGACGCAGAGTCTTTTTGct  
cgagctggcgaattcc  
>CD\_NM\_017442.2:1578  
CgCctGcgagtctGGtatGAAGTGAGAACTTCTCTACAAATTTCAAGAGATTTGTAGAGGAAGTTCTCACTCTTTTTGct  
cgagctggcgaattcc  
>CD\_NM\_017442.2:660  
CgCctGcgagtctGGtatGACCGCTGTCTCTCCTGGTGCAGTTCAAGAGACTGCACCAGGAGAGACAGCGGGTTTTGct  
cgagctggcgaattcc  
>CD\_NM\_017442.2:1154  
CgCctGcgagtctGGtatGCGGACGGCAACTGTTATTACAATTTCAAGAGATTGTAATAACAGTTGCCGTCCATTTTTGct  
cgagctggcgaattcc  
>CD\_NM\_017442.2:3429  
CgCctGcgagtctGGtatGAACGCTGTTTGTGCTGGCCACTTCAAGAGAGTGGCCAGCACAAACAGCGTCTTTTTGct  
cgagctggcgaattcc  
>CD\_NM\_017442.2:2745  
CgCctGcgagtctGGtatGAAGGCTGGATGTCAGCTGCAACTTCAAGAGAGTTGCAGCTGACATCCAGCCTTTTTGct  
cgagctggcgaattcc  
>CD\_NM\_017442.2:1089



CgCtGcgagtctGGtatGCACCAACATCCTGATGCTAGACTTCAAGAGAGTCTAGCATCAGGATGTTGGTATTTTTGct  
cgagctggcgaattcc  
>CD\_NM\_017442.2:1365  
CgCtGcgagtctGGtatGAGCCCTGCGTGTGCTCGATGTGTTCAAGAGACACATCGAGCACACGCAGGGCGTTTTGct  
cgagctggcgaattcc  
>CD\_NM\_017442.2:2058  
CgCtGcgagtctGGtatGAACCTTGATCTGTCACGGAACCTCAAGAGAGTCCGTGACAGATCCAAGGTGTTTTGct  
cgagctggcgaattcc  
>CD\_NM\_017442.2:3282  
CgCtGcgagtctGGtatGAGCAGACTGGGTGTACAACGAGTTCAGAGACTCGTTGTACACCCAGTCTGCCTTTTTGct  
cgagctggcgaattcc  
>CD\_NM\_017442.2:765  
CgCtGcgagtctGGtatGATGCAACTGGCTGTTCTGAAGTTCAGAGACTTCAGGAACAGCCAGTTGCAGTTTTGct  
cgagctggcgaattcc  
>CD\_NM\_017442.2:3024  
CgCtGcgagtctGGtatGAGGCCCTCAGCATCTTGCACAGTTCAGAGACTGTGCAAAGATGCTGAGGCCTTTTGct  
cgagctggcgaattcc  
>CD\_NM\_017442.2:3363  
CgCtGcgagtctGGtatGCCGCGACTGGCTGCCTGGCAAATTCAGAGATTTGCCAGGCAGCCAGTCGCGTTTTGct  
cgagctggcgaattcc  
>CD\_NM\_017442.2:2646  
CgCtGcgagtctGGtatGAAGCCTCCACTTCTGCCCAAATTCAGAGATTTGGGCAGGAAGTGGAGGCTTTTTGct  
cgagctggcgaattcc  
>CD\_NM\_017442.2:2277  
CgCtGcgagtctGGtatGAGCCCTGGACCTCAGCTACAACCTCAAGAGAGTTGTAGCTGAGGTCCAGGGCCTTTTTGct  
cgagctggcgaattcc  
>CD\_NM\_017442.2:1041  
CgCtGcgagtctGGtatGAACTGTGCCCTGCGCTGCCCAAATTCAGAGATTTGGGCAGCGCAGGCACAGTCTTTTTGct  
cgagctggcgaattcc  
>CD\_NM\_017442.2:897  
CgCtGcgagtctGGtatGACTGCGGCATCTCAACCTCAAGTTCAGAGACTTGAGGTTGAGATGCCGCAGTTTTGct  
cgagctggcgaattcc  
>CD\_NM\_017442.2:1314  
CgCtGcgagtctGGtatGATCCTACAACCGCATCGTCAAATTCAGAGATTTGACGATGCGGTTGTAGGACTTTTTGct  
cgagctggcgaattcc  
>CD\_NM\_017442.2:3123  
CgCtGcgagtctGGtatGAGGTGTGCCATGCTGCATCACTTCAAGAGAGTGTGTCAGCATGGGCACACCCTTTTTGct  
cgagctggcgaattcc  
>CD\_NM\_017442.2:1632  
CgCtGcgagtctGGtatGCACACAGCTGCGCAAGCTTAACTTCAAGAGAGTTAAGCTTGCGCAGCTGTGTTTTTTGct  
cgagctggcgaattcc  
>CD\_NM\_017442.2:3090  
CgCtGcgagtctGGtatGAGCCCTCTCGCTGCTGGCTGTGTTCAAGAGACACAGCCAGCAGCGAGAGGGCGTTTTGct  
cgagctggcgaattcc  
>CD\_NM\_017442.2:2673  
CgCtGcgagtctGGtatGCGTCTCGACCTGGCAGGAACTTCAAGAGAGTTTCTGCCAGGTCGAGGACTTTTTGct  
cgagctggcgaattcc  
>CD\_NM\_017442.2:1809  
CgCtGcgagtctGGtatGACTCCAGACTCTGCGTCTGCAGTTCAGAGACTGCAGACGCAGAGTCTGGAGCTTTTTGct  
cgagctggcgaattcc  
>CD\_NM\_017442.2:1374  
CgCtGcgagtctGGtatGCGTGCTCGATGTGGCGGAAATTTCAAGAGAATTTCCGCCACATCGAGCACATTTTTGct  
cgagctggcgaattcc  
>CD\_NM\_017442.2:2196

CgCtGcgagtctGGtatGAGGTCTGCAGGTGCTAGACCTGTTCAAGAGACAGGTCTAGCACCTGCAGACCGTTTTTGct  
cgagctggcgaattcc  
>CD\_NM\_017442.2:903  
CgCtGcgagtctGGtatGACATCTCAACCTCAAGTGGAACTTCAAGAGAGTCCACTTGAGGTTGAGATGTTTTTGct  
cgagctggcgaattcc  
>CD\_NM\_017442.2:1212  
CgCtGcgagtctGGtatGCGCCCTCCTTGGCCTGGGCAACTTCAAGAGAGTTGCCAGGCCAAGGAGGGCATTTTTTGct  
cgagctggcgaattcc  
>CD\_NM\_017442.2:1589  
CgCtGcgagtctGGtatGCCCTCTACAAATGCATCATAATTCAAGAGATTAGTGATGCATTTGTAGAGGATTTTTGct  
cgagctggcgaattcc  
>CD\_NM\_017442.2:1134  
CgCtGcgagtctGGtatGCGCCCTGCGCTTCCTATTTCATGTTCAAGAGACATGAATAGGAAGCGCAGGGCATTTTTTGct  
cgagctggcgaattcc  
>CD\_NM\_017442.2:1566  
CgCtGcgagtctGGtatGCGTGCTGGACCTGAGTGAGAACTTCAAGAGAGTTCCTACTCAGGTCCAGCACTTTTTTGct  
cgagctggcgaattcc  
>CD\_NM\_017442.2:2601  
CgCtGcgagtctGGtatGAGTGCTGCGTCTCCGTGACAATTTCAAGAGAATTGTCACGGAGACGCAGCACTTTTTGct  
cgagctggcgaattcc  
>CD\_NM\_017442.2:1646  
CgCtGcgagtctGGtatGCGCTTAACCTGTCCTTCAATTATTCAAGAGATAATTGAAGGACAGGTTAAGCTTTTTTGct  
cgagctggcgaattcc  
>CD\_NM\_017442.2:3408  
CgCtGcgagtctGGtatGATCGGTCTATGGCAGCCGCAAGTTCAAGAGACTTGCGGCTGCCATAGACCGAGTTTTTGct  
cgagctggcgaattcc  
>CD\_NM\_004329:580  
CgCtGcgagtctGGtatGCGGGAGCCTATTTGTTTCATCATTTCAAGAGAATGATGAACAAATAGGCTCCATTTTTGct  
cgagctggcgaattcc  
>CD\_NM\_004329:1889  
CgCtGcgagtctGGtatGCGGGATCGTGGAAGAATACCAATTCAAGAGATTGGTATTCTTCCACGATCCTTTTTGct  
cgagctggcgaattcc  
>CD\_NM\_004329:757  
CgCtGcgagtctGGtatGCTGCTATTAATAACACATGCATTTCAAGAGAATGCATGTGTTATTAATAGCATTTTTTGct  
cgagctggcgaattcc  
>CD\_NM\_004329:784  
CgCtGcgagtctGGtatGCTGGACATTGCTTTGCCATCATTTCAAGAGAATGATGGCAAAGCAATGTCCATTTTTTGct  
cgagctggcgaattcc  
>CD\_NM\_004329:926  
CgCtGcgagtctGGtatGAACCAATTTATGTAACCAGTATTTCAAGAGAATACTGGTTACATAAATTGGTCTTTTTGct  
cgagctggcgaattcc  
>CD\_NM\_004329:1534  
CgCtGcgagtctGGtatGAAGCCCTGCTTAAATTGGCTTATTCAAGAGATAAGCCAATTTAAGCAGGGCTTTTTGct  
cgagctggcgaattcc  
>CD\_NM\_004329:1957  
CgCtGcgagtctGGtatGCGCGTGAGGTTGTGTGTGTCAATTCAAGAGATTGACACACACAACCTCACGCATTTTTGct  
cgagctggcgaattcc  
>CD\_NM\_004329.2:613  
CgCtGcgagtctGGtatGCGGACAGAATCTGGATAGTATGTTCAAGAGACATACTATCCAGATTCTGTCCTTTTTTGct  
cgagctggcgaattcc  
>CD\_NM\_004329.2:748  
CgCtGcgagtctGGtatGCCAGATGATGCTATTAATAACTTCAAGAGAGTTATTAATAGCATCATCTGGATTTTTGct  
cgagctggcgaattcc  
>CD\_NM\_004329.2:838

CgCctGcgagtctGGtatGCTCAGGGTGTATGAAATATGAATTCAAGAGATTCATATTTTCATACACCTGAATTTTTTGct  
cgagctggcgaattcc  
>CD\_NM\_004329.2:1696  
CgCctGcgagtctGGtatGCGCTGTAAATCAACAGTGACTTCAAGAGAGTCACTGTTGAATTTAACAGCATTTTTTGct  
cgagctggcgaattcc  
>CD\_NM\_004329.2:1690  
CgCctGcgagtctGGtatGAGGCCTTGCTGTAAATCAACTTCAAGAGAGTGAATTTAACAGCAAGGCCCTTTTTGct  
cgagctggcgaattcc  
>CD\_NM\_004329.2:1963  
CgCctGcgagtctGGtatGAGTTGTGTGTGTCAAACGTTTGTTCAGAGACAAACGTTTGACACACACAACCTTTTTGct  
cgagctggcgaattcc  
>CD\_NM\_004329.2:1492  
CgCctGcgagtctGGtatGCTCTCTCTATGACTTCCTGAAATCAAGAGATTCAGGAAGTCATAGAGAGATTTTTGct  
cgagctggcgaattcc  
>CD\_NM\_004329.2:1885  
CgCctGcgagtctGGtatGCGGAGGGATCGTGGAAGAATACTTCAAGAGAGTATTCTTCCACGATCCCTCCTTTTTGct  
cgagctggcgaattcc  
>CD\_NM\_004329.2:743  
CgCctGcgagtctGGtatGAACTGTCCAGATGATGCTATTATTCAAGAGATAATAGCATCATCTGGACAGTGTTTTTGct  
cgagctggcgaattcc  
>CD\_NM\_004329.2:580  
CgCctGcgagtctGGtatGAGGAGCCTATTTGTTTCATCATTTTTCAAGAGAAATGATGAACAAATAGGCTCCCTTTTTGct  
cgagctggcgaattcc  
>CD\_NM\_004329.2:2079  
CgCctGcgagtctGGtatGAACTCACAGCATTGAGAATTAATTCAGAGATTAATTCTCAATGCTGTGAGTCTTTTTGct  
cgagctggcgaattcc  
>CD\_NM\_004329.2:1957  
CgCctGcgagtctGGtatGACGTGAGGTGTGTGTGTCAAATTCAGAGATTTGACACACACAACCTCACGCTTTTTGct  
cgagctggcgaattcc  
>CD\_NM\_004329.2:1456  
CgCctGcgagtctGGtatGCCAGCTCTATTTGATTACTGATTTCAAGAGAATCAGTAATCAAATAGAGCTGATTTTTGct  
cgagctggcgaattcc  
>CD\_NM\_004329.2:1771  
CgCctGcgagtctGGtatGAGCTCCCGAAGTGCTGGACGAATTCAGAGATTCGTCCAGCACTTCGGGAGCCTTTTTGct  
cgagctggcgaattcc  
>CD\_NM\_004329.2:746  
CgCctGcgagtctGGtatGCGTCCAGATGATGCTATTAATATTCAAGAGATATTAATAGCATCATCTGGACATTTTTGct  
cgagctggcgaattcc  
>CD\_NM\_004329.2:1181  
CgCctGcgagtctGGtatGAAGTCACAAAGTTCTGGTAGTGTTCAGAGACACTACCAGAACTTTGTGACTGTTTTGct  
cgagctggcgaattcc  
>CD\_NM\_004329.2:1806  
CgCctGcgagtctGGtatGCCACTTCCAGCCCTACATCATTTCAAGAGAATGATGTAGGGCTGGAAGTGGTTTTTTGct  
cgagctggcgaattcc  
>CD\_NM\_004329.2:2117  
CgCctGcgagtctGGtatGCTGGTTGAATCCCAAGATGTAATTCAGAGATTACATCTTGGGATTCACCATTTTTGct  
cgagctggcgaattcc  
>CD\_NM\_004329.2:1352  
CgCctGcgagtctGGtatGACCAGCTGGTTTCGAGAAACAGTTCAAGAGACTGTTTCTCGAAACCAGCTGGCTTTTTGct  
cgagctggcgaattcc  
>CD\_NM\_004329.2:827  
CgCctGcgagtctGGtatGCCACATTAGCTTCAGGGTGTATTCAAGAGATACACCCTGAAGCTAATGTGGTTTTTTGct  
cgagctggcgaattcc  
>CD\_NM\_004329.2:790

CgCctGcgagtctGGtatGCTGCTTTGCCATCATAGAAGAATTCAAGAGATTCTTCTATGATGGCAAAGCAATTTTTGct  
cgagctggcgaattcc  
>CD\_NM\_004329.2:569  
CgCctGcgagtctGGtatGCTCAGATTATTGGGAGCCTATTTTCAAGAGAAATAGGCTCCAATAATCTGATTTTTTgct  
cgagctggcgaattcc  
>CD\_NM\_004329.2:1416  
CgCctGcgagtctGGtatGATTTTCATAGCGGCAGACATTAATTCAAGAGATTAATGTCTGCCGCTATGAAACTTTTTGct  
cgagctggcgaattcc  
>CD\_NM\_004329.2:2075  
CgCctGcgagtctGGtatGCCAGACTCACAGCATTGAGAATTCAAGAGATTCTCAATGCTGTGAGTCTGGATTTTTGct  
cgagctggcgaattcc  
>CD\_NM\_004329.2:1610  
CgCctGcgagtctGGtatGCAGCCCGCAATTGCTCATCGAGTTCAAGAGACTCGATGAGCAATTGCGGGCTTTTTTgct  
cgagctggcgaattcc  
>CD\_NM\_004329.2:834  
CgCctGcgagtctGGtatGCAGCTTCAGGGTGTATGAAATATTCAAGAGATATTTTCATACACCCCTGAAGCTATTTTTGct  
cgagctggcgaattcc  
>CD\_NM\_001203:422  
CgCctGcgagtctGGtatGCCGGATATTGTTTCACGATGATTTCAAGAGAATCATCGTGAAACAATATCCGTTTTTgct  
cgagctggcgaattcc  
>CD\_NM\_001203:740  
CgCctGcgagtctGGtatGAACCTCGATACAGCATTGGGTTTTTCAAGAGAAACCAATGCTGTATCGAGGTCTTTTTGct  
cgagctggcgaattcc  
>CD\_NM\_001203:788  
CgCctGcgagtctGGtatGATGGAGAATCCCTGAGAGACTTTTTCAAGAGAAAGTCTCTCAGGGATTCTCCAGTTTTTgct  
cgagctggcgaattcc  
>CD\_NM\_001203:1083  
CgCctGcgagtctGGtatGATCCTGGACCCAGTTGTACCTATTCAAGAGATAGGTACAACCTGGGTCCAGGACTTTTTGct  
cgagctggcgaattcc  
>CD\_NM\_001203:1163  
CgCctGcgagtctGGtatGCCGCTAAATCAATGCTGAAGTTTTTCAAGAGAAACTTCAGCATTGATTTAGCGTTTTTgct  
cgagctggcgaattcc  
>CD\_NM\_001203:1420  
CgCctGcgagtctGGtatGCTGGACGAGAGCTTGAACAGAATTCAAGAGATTCTGTTCAAGCTCTCGTCCAATTTTTGct  
cgagctggcgaattcc  
>CD\_NM\_001203:1324  
CgCctGcgagtctGGtatGATGGGCCTGGCTGTTAAATTTATTCAAGAGATAAATTTAACAGCCAGGCCAGTTTTTgct  
cgagctggcgaattcc  
>CD\_NM\_001203:1325  
CgCctGcgagtctGGtatGCGGGCCTGGCTGTTAAATTTATTTCAAGAGAATAAATTTAACAGCCAGGCCATTTTTGct  
cgagctggcgaattcc  
>CD\_NM\_001203.1:1594  
CgCctGcgagtctGGtatGAGGAGATTGTGTGCATCAAGAATTCAAGAGATTCTTGATGCACACAATCTCCCTTTTTGct  
cgagctggcgaattcc  
>CD\_NM\_001203.1:1441  
CgCctGcgagtctGGtatGCTCACTTCCAGTCTTACATCATTTCAGAGAATGATGTAAGACTGGAAGTGATTTTTTgct  
cgagctggcgaattcc  
>CD\_NM\_001203.1:1520  
CgCctGcgagtctGGtatGCGGAGGTATAGTGAAGAATACTTCAAGAGAGTATTCTTCCACTATACCTCCTTTTTTgct  
cgagctggcgaattcc  
>CD\_NM\_001203.1:1193  
CgCctGcgagtctGGtatGCTCTGTCAGTGGCTTATGTCATTTCAAGAGAATGACATAAGCCACTGACAGAATTTTTGct  
cgagctggcgaattcc  
>CD\_NM\_001203.1:662

CgCctGcgagtctGGtatGCTCTGTGACTGTCTGTAGTTTGTTC AAGAGACAACTACAGACAGTCACAGATTTTTTGGct  
cgagctggcgaattcc  
>CD\_NM\_001203.1:519  
CgCctGcgagtctGGtatGAACACTCCCATTCCATCAAATTC AAGAGATTTGATGAGGAATGGGAGTGTCTTTTTGGct  
cgagctggcgaattcc  
>CD\_NM\_001203.1:1325  
CgCctGcgagtctGGtatGAGGCCTGGCTGTTAAATTTATTTT CAAGAGAAATAAATTTAACAGCCAGGCCTTTTTGGct  
cgagctggcgaattcc  
>CD\_NM\_001203.1:535  
CgCctGcgagtctGGtatGCTCAAAGAAGATCAATTGAATGTT CAAGAGACATTCAATTGATCTTCTTTGATTTTTTGGct  
cgagctggcgaattcc  
>CD\_NM\_001203.1:1159  
CgCctGcgagtctGGtatGCAGACGCTAAATCAATGCTGAATT CAAGAGATTCAGCATTGATTTAGCGTCTATTTTTGGct  
cgagctggcgaattcc  
>CD\_NM\_001203.1:842  
CgCctGcgagtctGGtatGCGGCCTCCCTCTGCTGGTCCAATT CAAGAGATTGGACCAGCAGAGGGAGGCCTTTTTGGct  
cgagctggcgaattcc  
>CD\_NM\_001203.1:428  
CgCctGcgagtctGGtatGCTGTTTCACGATGATAGAAGAGTT CAAGAGACTCTTCTATCATCGTGAAACAATTTTTGGct  
cgagctggcgaattcc  
>CD\_NM\_001203.1:515  
CgCctGcgagtctGGtatGCCGGGACACTCCCATTCCATTTCA AGAGAATGAGGAATGGGAGTGTCCCGATTTTTTGGct  
cgagctggcgaattcc  
>CD\_NM\_001203.1:1323  
CgCctGcgagtctGGtatGATGGGCCTGGCTGTTAAATTTATT CAAGAGATAAATTTAACAGCCAGGCCCAGTTTTTGGct  
cgagctggcgaattcc  
>CD\_NM\_001203.1:1592  
CgCctGcgagtctGGtatGAAGGGAGATTGTGTGCATCAAGTT CAAGAGACTTGATGCACACAATCTCCCTCTTTTTGGct  
cgagctggcgaattcc  
>CD\_NM\_001203.1:1195  
CgCctGcgagtctGGtatGATGTCAAGTGGCTTATGTCATTTT CAAGAGAAAATGACATAAGCCACTGACAGTTTTTGGct  
cgagctggcgaattcc  
>CD\_NM\_001203.1:794  
CgCctGcgagtctGGtatGCTCCCTGAGAGACTTAATTGAGTT CAAGAGACTCAATTAAGTCTCTCAGGGATTTTTTGGct  
cgagctggcgaattcc  
>CD\_NM\_001203.1:996  
CgCctGcgagtctGGtatGCTCAGAGAGACAGAAATATATCTT CAAGAGAGATATATTTCTGTCTCTCTGAATTTTTTGGct  
cgagctggcgaattcc  
>CD\_NM\_001203.1:1436  
CgCctGcgagtctGGtatGAAGAAATCACTTCCAGTCTTACTT CAAGAGAGTAAGACTGGAAGTGATTTCTGTTTTTGGct  
cgagctggcgaattcc  
>CD\_NM\_001203.1:1692  
CgCctGcgagtctGGtatGCGGGCTCACAATCCTGCATCAATT CAAGAGATTGATGCAGGATTGTGAGCCATTTTTTGGct  
cgagctggcgaattcc  
>CD\_NM\_001203.1:1127  
CgCctGcgagtctGGtatGCTCCCTTTATGATTATCTGAAGTT CAAGAGACTTCAGATAATCATAAAGGGAATTTTTTGGct  
cgagctggcgaattcc  
>CD\_NM\_001203.1:814  
CgCctGcgagtctGGtatGCGCAGTCTCAGAGCTCAGGAAGTT CAAGAGACTTCTGAGCTCTGAGACTGCTTTTTTGGct  
cgagctggcgaattcc  
>CD\_NM\_001203.1:1152  
CgCctGcgagtctGGtatGCCACCCCTAGACGCTAAATCAATT CAAGAGATTGATTTAGCGTCTAGGGTGGTTTTTGGct  
cgagctggcgaattcc  
>CD\_NM\_001203.1:1754

CgCtGcgagtctGGtatGATCAGAGTCCAGGACATTAATTC AAGAGATTTAATGTCCTGGGACTCTGACTTTTTTGct  
cgagctggcgaattcc  
>CD\_NM\_001203.1:686  
CgCtGcgagtctGGtatGATTGGTCCTTATCATATTATTTTCAAGAGAAAATAATATGATAAGGACCAAGTTTTTGct  
cgagctggcgaattcc  
>CD\_NM\_001203.1:1542  
CgCtGcgagtctGGtatGAAGCTTCTTATCATGACCTAGTTCAAGAGACTAGGTCATGATAAGGAAGCTTTTTTGct  
cgagctggcgaattcc  
>CD\_NM\_004778:644  
CgCtGcgagtctGGtatGAGGCGCATTATGTGCTACTACATTCAAGAGATGTAGTAGCACATAATGCGCCTTTTTGct  
cgagctggcgaattcc  
>CD\_NM\_004778:642  
CgCtGcgagtctGGtatGCCGGGCGCATTATGTGCTACTATTCAAGAGATAGTAGCACATAATGCGCCGTTTTTGct  
cgagctggcgaattcc  
>CD\_NM\_004778.1:644  
CgCtGcgagtctGGtatGAGCGCATTATGTGCTACTACAATTCAAGAGATTGTAGTAGCACATAATGCGCCTTTTTGct  
cgagctggcgaattcc  
>CD\_NM\_004778.1:431  
CgCtGcgagtctGGtatGCCTCCTCCATCTTCTTTCTCAATTCAAGAGATTGAGAAAGAAGATGGAGGAGTTTTTGct  
cgagctggcgaattcc  
>CD\_NM\_004778.1:357  
CgCtGcgagtctGGtatGCTCCCTGCCCTTCTTACCTACTTCAAGAGAGTAGGTGAAGAAGGGCAGGGAATTTTTGct  
cgagctggcgaattcc  
>CD\_NM\_004778.1:1077  
CgCtGcgagtctGGtatGACTGGAGAGCGTGCTGGTGGACTTCAAGAGAGTCCACCAGCACGCTCTCCAGCTTTTTGct  
cgagctggcgaattcc  
>CD\_NM\_004778.1:240  
CgCtGcgagtctGGtatGACTGCTGGGCCCTGGTGGAGAATTTCAAGAGAATTCTCCACCAGGCCAGCAGCTTTTTGct  
cgagctggcgaattcc  
>CD\_NM\_004778.1:792  
CgCtGcgagtctGGtatGAGCCGTGAGCCTGCGGTTGCAGTTCAAGAGACTGCAACCGCAGGCTCACGGCTTTTTGct  
cgagctggcgaattcc  
>CD\_NM\_004778.1:603  
CgCtGcgagtctGGtatGACCCTATTTCTGTTCCTGGGACTTCAAGAGAGTCCCGGAACACGAAATAGGGCTTTTTGct  
cgagctggcgaattcc  
>CD\_NM\_004778.1:432  
CgCtGcgagtctGGtatGATCCTCCATCTTCTTTCTCAACTTCAAGAGAGTTGAGAAAGAAGATGGAGGAGTTTTTGct  
cgagctggcgaattcc  
>CD\_NM\_004778.1:353  
CgCtGcgagtctGGtatGATGCTTCCCTGCCCTTCTTCACTTCAAGAGAGTGAAGAAGGGCAGGGAAGCAGTTTTTGct  
cgagctggcgaattcc  
>CD\_NM\_004778.1:114  
CgCtGcgagtctGGtatGATCGGCCAACGCCACACTGAAGTTCAAGAGACTTCAAGTGTGGCGTTGGCCGACTTTTTGct  
cgagctggcgaattcc  
>CD\_NM\_004778.1:438  
CgCtGcgagtctGGtatGAATCTTCTTTCTCAACATGTTCTTCAAGAGAGAACATGTTGAGAAAGAAGATTTTTTGct  
cgagctggcgaattcc  
>CD\_NM\_004778.1:261  
CgCtGcgagtctGGtatGCGGAGTCATCCTCTTCTGTTGTTCAAGAGACACCACGAAGAGGATGACTCCATTTTTGct  
cgagctggcgaattcc  
>CD\_NM\_004778.1:362  
CgCtGcgagtctGGtatGCGCCCTTCTTACCTACTTCTTTTCAAGAGAAAGAAGTAGGTGAAGAAGGGCATTTTTTGct  
cgagctggcgaattcc  
>CD\_NM\_004778.1:735

CgCtGcgagtctGGtatGAAGCAAGTTCCTGCTGGCCTTCTTCAAGAGAGAAGGCCAGCAGGAAGTCTGCTGTTTTTGct  
cgagctggcgaattcc  
>CD\_NM\_004778.1:165  
CgCtGcgagtctGGtatGACGTCTCCAGAGCCACAGCAACTTCAAGAGAGTTGCTGTGGCTCTGGAGACGGTTTTTGct  
cgagctggcgaattcc  
>CD\_NM\_004778.1:155  
CgCtGcgagtctGGtatGCGCAGATGAGCCGTCTCCAGAGTTCAAGAGACTCTGGAGACGGCTCATCTGCTTTTTTGct  
cgagctggcgaattcc  
>CD\_NM\_004778.1:723  
CgCtGcgagtctGGtatGAGCCCTGGCCGTGAGCAAGTTCCTTCAAGAGAGAAGTCTGCTGACGGCCAGGGCCTTTTTTGct  
cgagctggcgaattcc  
>CD\_NM\_004778.1:326  
CgCtGcgagtctGGtatGCCCTGGCGCTGTCCGACCTGTTTTCAAGAGAAACAGGTCGGACAGCGCCAGGTTTTTGct  
cgagctggcgaattcc  
>CD\_NM\_004778.1:170  
CgCtGcgagtctGGtatGCCAGAGCCACAGCAACACCAGTTCAAGAGACTGGTGTGCTGTGGCTCTGGATTTTTTGct  
cgagctggcgaattcc  
>CD\_NM\_004778.1:642  
CgCtGcgagtctGGtatGAGGGCGCATTATGTGCTACTACTTCAAGAGAGTAGTAGCACATAATGCGCCCGTTTTTGct  
cgagctggcgaattcc  
>CD\_NM\_004778.1:458  
CgCtGcgagtctGGtatGCCGCCAGCGGCTTCCTGCTCAGTTCAAGAGACTGAGCAGGAAGCCGCTGGCGATTTTTTGct  
cgagctggcgaattcc  
>CD\_NM\_004778.1:351  
CgCtGcgagtctGGtatGATCTGCTTCCCTGCCCTTCTTCTTCAAGAGAGAAGAAGGGCAGGGAAGCAGAGTTTTTGct  
cgagctggcgaattcc  
>CD\_NM\_004778.1:434  
CgCtGcgagtctGGtatGACTCCATCTTCTTCTCAACATTTCAAGAGAATGTTGAGAAAGAAGATGGAGGTTTTTGct  
cgagctggcgaattcc  
>CD\_NM\_004778.1:404  
CgCtGcgagtctGGtatGCGCTGGGCACCACCTTCTGCAATTTCAAGAGATTGCAGAAGGTGGTGGCCAGCTTTTTTGct  
cgagctggcgaattcc  
>CD\_NM\_004778.1:180  
CgCtGcgagtctGGtatGAAGCAACACCAGCATCCGCTACTTCAAGAGAGTAGCGGATGCTGGTGTGCTGTTTTTGct  
cgagctggcgaattcc  
>CD\_NM\_004778.1:977  
CgCtGcgagtctGGtatGCCACCAGCCTGGCCTTCTTCAATTTCAAGAGATTGAAGAAGGCCAGGCTGGTGATTTTTTGct  
cgagctggcgaattcc  
>CD\_NM\_004778.1:552  
CgCtGcgagtctGGtatGAGCGCACAAAGTCTGCCTGGTGTTCAGAGACACCAGGCAGACTTTGTGCGCCTTTTTTGct  
cgagctggcgaattcc  
>CD\_NM\_004778.1:516  
CgCtGcgagtctGGtatGACCGGTGTGGGCGCAGAACCCTTCAAGAGAGTGGTCTGCGCCCACACCGGCTTTTTTGct  
cgagctggcgaattcc  
>CD\_NM\_004778.1:1002  
CgCtGcgagtctGGtatGAGTGGCCAACCCGGTGTCTACTTCAAGAGAGTAGAGCACCGGGTTGGCCACGTTTTTGct  
cgagctggcgaattcc  
>CD\_NM\_004778.1:891  
CgCtGcgagtctGGtatGACCCTACCACGTGTTTCAAGAGACAGGCTGAACACGTGGTAGGGCTTTTTTGct  
cgagctggcgaattcc  
>CD\_NM\_004778.1:338  
CgCtGcgagtctGGtatGACGACCTGTTGGCCTCTGCTTCTTCAAGAGAGAAGCAGAGGCCAACAGGTCGGTTTTTGct  
cgagctggcgaattcc  
>CD\_NM\_002303:348

CgCctGcgagtctGGtatGCGCCTGCTGGACTCTCAAAGAATTCAAGAGATTCTTTGAGAGTCCAGCAGGCATTTTTGct  
cgagctggcgaattcc  
>CD\_NM\_002303:399  
CgCctGcgagtctGGtatGAAGCTGTTGAACCTAAGTTTAATTCAAGAGATTAACTTAGGTTCAACAGCTGTTTTGct  
cgagctggcgaattcc  
>CD\_NM\_002303:996  
CgCctGcgagtctGGtatGCTCCACTTCAATATCAAGTGAATTCAAGAGATTCACCTTGATATTGAAGTGAATTTTTGct  
cgagctggcgaattcc  
>CD\_NM\_002303:2621  
CgCctGcgagtctGGtatGCACCAGTTCAGTCTTTACCCAATTCAAGAGATTGGGTAAAGACTGAACTGGTATTTTTGct  
cgagctggcgaattcc  
>CD\_NM\_002303:2708  
CgCctGcgagtctGGtatGAACCAGAGTGATGCAGGTTTATTTCAAGAGAATAAACCTGCATCACTCTGGTGTTTTTGct  
cgagctggcgaattcc  
>CD\_NM\_001003679.1:2683  
CgCctGcgagtctGGtatGCTCACTCAAGATGATATTGAAATTCAAGAGATTTCAATATCATCTTGAGTGAATTTTTGct  
cgagctggcgaattcc  
>CD\_NM\_001003679.1:940  
CgCctGcgagtctGGtatGCTCACAGATGATGGTAATTTAATTCAAGAGATTAAATTACCATCATCTGTGATTTTTGct  
cgagctggcgaattcc  
>CD\_NM\_001003679.1:1292  
CgCctGcgagtctGGtatGCAGAGATTGTTTGGTGGATGAATTCAAGAGATTCATCCACCAAACAATCTTTTTTTGct  
cgagctggcgaattcc  
>CD\_NM\_001003679.1:1351  
CgCctGcgagtctGGtatGATGAGTGATCATGTTAGCAAAGTTCAAGAGACTTTGCTAACATGATCACTCACTTTTTGct  
cgagctggcgaattcc  
>CD\_NM\_001003679.1:1042  
CgCctGcgagtctGGtatGCTCAGAGAAGCTGACAAGATTGTTCAAGAGACAATCTTGTCAGCTTCTCTGATTTTTGct  
cgagctggcgaattcc  
>CD\_NM\_001003679.1:942  
CgCctGcgagtctGGtatGAACAGATGATGGTAATTTAAAGTTCAAGAGACTTTAAATTACCATCATCTGTGTTTTGct  
cgagctggcgaattcc  
>CD\_NM\_001003679.1:350  
CgCctGcgagtctGGtatGATGCTGGACTCTCAAAGAATACTTCAAGAGAGTATTCTTTGAGAGTCCAGCAGTTTTGct  
cgagctggcgaattcc  
>CD\_NM\_001003679.1:507  
CgCctGcgagtctGGtatGCGCAGACAACATTGAAGGAAAGTTCAAGAGACTTTCCTTCAATGTTGTCTGCATTTTTGct  
cgagctggcgaattcc  
>CD\_NM\_001003679.1:1724  
CgCctGcgagtctGGtatGACTACACAATGTGGATTAGGATTTCAAGAGAATCCTAATCCACATTGTGTAGCTTTTTGct  
cgagctggcgaattcc  
>CD\_NM\_001003679.1:1188  
CgCctGcgagtctGGtatGAACACAAGATGTCATATACTTTTTCAAGAGAAAAGTATATGACATCTTGTGTGTTTTGct  
cgagctggcgaattcc  
>CD\_NM\_001003679.1:1381  
CgCctGcgagtctGGtatGCTCAATCTGAATGAAACCAAACCTTCAAGAGAGTTTGGTTTCATTCAGATTGAATTTTTGct  
cgagctggcgaattcc  
>CD\_NM\_001003679.1:485  
CgCctGcgagtctGGtatGCAGATAGAACTGCTCCTTATGTTCAAGAGACATAAGGAGCAGTTTCTATCTTTTTTTGct  
cgagctggcgaattcc  
>CD\_NM\_001003679.1:882  
CgCctGcgagtctGGtatGATCAGTTCAGCCATAAATATGTTCAAGAGACATATTTATGGGCTGAACTGACTTTTTGct  
cgagctggcgaattcc  
>CD\_NM\_001003679.1:2022



CgCctGcgagtctGGtatGCGCTGTTCAAGTGGCGCTGTAAGTTCAAGAGACTTACAGCGCACCTGAACAGCATTGCT  
cgagctggcgaattcc  
>CD\_NM\_001003679.1:1818  
CgCctGcgagtctGGtatGCCATCCAGTGTAAAGCAGAATTCAGAGATTCTGCTTTCACACTGGATGGATGCT  
cgagctggcgaattcc  
>CD\_NM\_001003679.1:1479  
CgCctGcgagtctGGtatGCGTGATTGATGTCAATATCAATTTCAAGAGAATTGATATTGACATCAATCACATGCT  
cgagctggcgaattcc  
>CD\_NM\_001003679.1:2487  
CgCctGcgagtctGGtatGAAGTGATTACAAGCTAATGTATTTCAAGAGAATACATTAGCTTGTAATCACTGCT  
cgagctggcgaattcc  
>CD\_NM\_001003679.1:581  
CgCctGcgagtctGGtatGAGAACATACAGTGTGGCTAAATTCAGAGATTTAGCCAGCACTGTATGCTTCT  
cgagctggcgaattcc  
>CD\_NM\_001003679.1:757  
CgCctGcgagtctGGtatGCGCAATTGCAGTGTTCATGAATTTCAAGAGAATTCATGAACACTGCAATTGCAT  
cgagctggcgaattcc  
>CD\_NM\_001003679.1:1493  
CgCctGcgagtctGGtatGCTATCAATATCTCATGTGAACTTCAAGAGAGTTTCACATGAGATATTGATAT  
cgagctggcgaattcc  
>CD\_NM\_001003679.1:1890  
CgCctGcgagtctGGtatGCCAGAGAATAACCTTCAATTTCAAGAGAGAATTGAAGGTTATTCTCTGGAT  
cgagctggcgaattcc  
>CD\_NM\_001003679.1:1700  
CgCctGcgagtctGGtatGCCAGCCAATCTTCTATTATCTTCAAGAGAGATAATAGGAAGATTGGCTGGAT  
cgagctggcgaattcc  
>CD\_NM\_001003679.1:1632  
CgCctGcgagtctGGtatGCTCTATTTCATCCCATATCTGAGTTCAAGAGACTCAGATATGGGATGAATAGAT  
cgagctggcgaattcc  
>CD\_NM\_001003679.1:1879  
CgCctGcgagtctGGtatGCAGCCAGTCTTCCAGAGAATATTCAGAGATATTCTCTGGAAAGACTGGCT  
cgagctggcgaattcc  
>CD\_NM\_001003679.1:1744  
CgCctGcgagtctGGtatGCTCAATCACTCTCTAGGTTCACTTCAAGAGAGTGAACCTAGAGAGTGATTGAT  
cgagctggcgaattcc  
>CD\_NM\_001003679.1:1609  
CgCctGcgagtctGGtatGCGCCTTTACTGTTCTGATATTCTTCAAGAGAGAATATCAGAACAGTAAAGGCT  
cgagctggcgaattcc  
>CD\_NM\_001003679.1:2249  
CgCctGcgagtctGGtatGCTCATACTTCTGCAATGGAACCTTCAAGAGAGTTCCATTGCAGGAAGTATGAT  
cgagctggcgaattcc  
>CD\_NM\_001003679.1:2761  
CgCctGcgagtctGGtatGCTCTTATTGCTTGGAACATTATTTCAAGAGAATAATGTTCCAAGCAATAAGAT  
cgagctggcgaattcc  
>CD\_NM\_004314:962  
CgCctGcgagtctGGtatGCGGGCCTTGCCATCTGGATAATTTCAAGAGAATTATCCAGATGGCAAGGCCA  
cgagctggcgaattcc  
>CD\_NM\_004314:526  
CgCctGcgagtctGGtatGAGGCCACTACCTCCACCCTTTTCAAGAGAAAGTGGTGGAGGTAGTGGGCC  
cgagctggcgaattcc  
>CD\_NM\_004314:184  
CgCctGcgagtctGGtatGAACGACGAGACCTTCTCTCATTCAGAGATGAGAGAAGAGGTCTCGTCGTG  
cgagctggcgaattcc  
>CD\_NM\_004314:930

CgCctGcgagtctGGtatGCGCGAGTACATCAAAGACAAGATTCAAGAGATCTTGTCTTTGATGTACTCGCATTTTTTGct  
cgagctggcgaattcc  
>CD\_NM\_004314.961  
CgCctGcgagtctGGtatGATGGGCCTTGCCATCTGGATAATTCAAGAGATTATCCAGATGGCAAGGCCAGTTTTTGct  
cgagctggcgaattcc  
>CD\_NM\_004314.1:928  
CgCctGcgagtctGGtatGATGCGAGTACATCAAAGACAAGTTCAAGAGACTTGTCTTTGATGTACTCGCAGTTTTTGct  
cgagctggcgaattcc  
>CD\_NM\_004314.1:559  
CgCctGcgagtctGGtatGCCTCCATTTCTGCTGACTGAGTTCAAGAGACTCAGTCAGCAGGAAATGGAGTTTTTGct  
cgagctggcgaattcc  
>CD\_NM\_004314.1:191  
CgCctGcgagtctGGtatGAACCTCTTCTCTCAAGAGATTCTTCAAGAGAGAATCTCTTGAGAGAAGAGGCTTTTTTGct  
cgagctggcgaattcc  
>CD\_NM\_004314.1:526  
CgCctGcgagtctGGtatGAGCCCACTACCTCCACCCTTCTTCAAGAGAGAAGTGGTGGAGGTAGTGGGCCTTTTTTGct  
cgagctggcgaattcc  
>CD\_NM\_004314.1:537  
CgCctGcgagtctGGtatGCCCACTTCTCCTTCAAGACTTCAAGAGAGTCTTGAAGGAGAAGTGGTGGATTTTTTGct  
cgagctggcgaattcc  
>CD\_NM\_004314.1:189  
CgCctGcgagtctGGtatGAAGACCTCTTCTCTCAAGAGATTTCAAGAGAATCTCTTGAGAGAAGAGGCTCTTTTTTGct  
cgagctggcgaattcc  
>CD\_NM\_004314.1:310  
CgCctGcgagtctGGtatGAGCCAACCAGGTGTATGCAGACTTCAAGAGAGTCTGCATACACCTGGTTGGCCTTTTTTGct  
cgagctggcgaattcc  
>CD\_NM\_004314.1:797  
CgCctGcgagtctGGtatGCCCTTCTTCCCTGGAGAGGAAGTTCAAGAGACTTCTCTCCAGGGAAGAAGGATTTTTTGct  
cgagctggcgaattcc  
>CD\_NM\_004314.1:254  
CgCctGcgagtctGGtatGAGCTGTGCTGCTGCCATGACAGTTCAAGAGACTGTCATGGCAGCAGCACAGCCTTTTTTGct  
cgagctggcgaattcc  
>CD\_NM\_004314.1:115  
CgCctGcgagtctGGtatGCATGATGTCTCTGCTTCTTGTGTTCAAGAGACACAAGAAGCAGAGACATCATATTTTTTGct  
cgagctggcgaattcc  
>CD\_NM\_004314.1:835  
CgCctGcgagtctGGtatGATTTGAGACCTTCCAAGTGATCTTCAAGAGAGATCACTTGGAAAGGTCTCAAAGTTTTTGct  
cgagctggcgaattcc  
>CD\_NM\_004314.1:703  
CgCctGcgagtctGGtatGCTCTGCCTCCCTGAAGCATGTTTTCAAGAGAAACATGCTTCAGGGAGGCAGAATTTTTTGct  
cgagctggcgaattcc  
>CD\_NM\_004314.1:724  
CgCctGcgagtctGGtatGCGCAGCCCAGCAGTTTGGTGAGTTCAAGAGACTCACCAAAGTCTGGGCTGCATTTTTTGct  
cgagctggcgaattcc  
>CD\_NM\_004314.1:121  
CgCctGcgagtctGGtatGATCTCTGCTTCTTGTGTCTGTGTTCAAGAGACACAGACACAAGAAGCAGAGACTTTTTTGct  
cgagctggcgaattcc  
>CD\_NM\_004314.1:119  
CgCctGcgagtctGGtatGCTGTCTCTGCTTCTTGTGTCTGTGTTCAAGAGACAGACACAAGAAGCAGAGACATTTTTTGct  
cgagctggcgaattcc  
>CD\_NM\_004314.1:154  
CgCctGcgagtctGGtatGCGCACTTCAGGCCAGAGCCACTTCAAGAGAGTGGCTCTGGGCCTGAAGTGCTTTTTTGct  
cgagctggcgaattcc  
>CD\_NM\_004314.1:134

CgCtGcgagtctGGtatGATGTCTGTGGGCTCATGGAAGTTCAAGAGACTTCCATGAGGCCACAGACACTTTTTGct  
cgagctggcgaattcc  
>CD\_NM\_004314.1:184  
CgCtGcgagtctGGtatGCCGACGAGACCTTCTCTCAATTCAAGAGATTGAGAGAAGAGGTCTCGTCGTTTTTTGct  
cgagctggcgaattcc  
>CD\_NM\_004314.1:271  
CgCtGcgagtctGGtatGAACAGCTGCTCTCCCGATCTTCAAGAGAGATCCGGGAGAGCAGCTGTCTTTTTGct  
cgagctggcgaattcc  
>CD\_NM\_004314.1:961  
CgCtGcgagtctGGtatGCGGGCTTGCCATCTGGATAATTTCAAGAGAATTATCCAGATGGCAAGGCCATTTTTGct  
cgagctggcgaattcc  
>CD\_NM\_004314.1:294  
CgCtGcgagtctGGtatGCCACACGGAGTCCAGGCCAATTCAAGAGATTGGCCTGGAACCTCCGTGTGGTTTTTTGct  
cgagctggcgaattcc  
>CD\_NM\_004314.1:130  
CgCtGcgagtctGGtatGCCTTGTGTCTGTGGGCTCATGTTCAAGAGACATGAGGCCACAGACACAAGATTTTTGct  
cgagctggcgaattcc  
>CD\_NM\_004314.1:965  
CgCtGcgagtctGGtatGACTTGCCATCTGGATAATTCAGTTCAAGAGACTGAATTATCCAGATGGCAAGTTTTGct  
cgagctggcgaattcc  
>CD\_NM\_004314.1:808  
CgCtGcgagtctGGtatGCGGAGAGGAAGAGGTGCTGATCTTCAAGAGAGATCAGCACCTTCTCTCCATTTTTGct  
cgagctggcgaattcc  
>CD\_NM\_004314.1:223  
CgCtGcgagtctGGtatGAGCCCTGGCCTCCTTTGATGACTTCAAGAGAGTCATCAAAGGAGGCCAGGGCCTTTTTGct  
cgagctggcgaattcc  
>CD\_NM\_004314.1:375  
CgCtGcgagtctGGtatGAGTGGCCAGAGTGGAGTCTCAGTTCAAGAGACTGAGACTCCACTCTGGCCACCTTTTTGct  
cgagctggcgaattcc  
>CD\_NM\_004314.1:707  
CgCtGcgagtctGGtatGACCTCCCTGAAGCATGTTGCAGTTCAAGAGACTGCAACATGCTTCAGGGAGGCTTTTTGct  
cgagctggcgaattcc  
>CD\_NM\_004314.1:962  
CgCtGcgagtctGGtatGAGGCCTTGCCATCTGGATAATTTTCAAGAGAAATTATCCAGATGGCAAGGCCTTTTGct  
cgagctggcgaattcc  
>CD\_NM\_021071:1178  
CgCtGcgagtctGGtatGAAACTGGGAACCTGAGCACATATTTCAAGAGATATGTGCTCAGGTTCCAGTTGTTTTGct  
cgagctggcgaattcc  
>CD\_NM\_021071:498  
CgCtGcgagtctGGtatGCGAGGGTCTGAGGTTGCAATTTTCAAGAGAAATTGCAACCTCAGAACCCTTTTTGct  
cgagctggcgaattcc  
>CD\_NM\_021071:1106  
CgCtGcgagtctGGtatGCCCTCCCTATGAGCTGTTTAATTCAAGAGATTAAACAGCTCATAGGGAGGGATTTTTGct  
cgagctggcgaattcc  
>CD\_NM\_021071:500  
CgCtGcgagtctGGtatGCGGGTCTGAGGTTGCAATTAATTCAAGAGATTAATTGCAACCTCAGAACCCTTTTTGct  
cgagctggcgaattcc  
>CD\_NM\_021071:565  
CgCtGcgagtctGGtatGAAAGGCTGTAGCAAACAGGTTATTCAAGAGATAACCTGTTTGTACAGCCTGTTTTGct  
cgagctggcgaattcc  
>CD\_NM\_021071:815  
CgCtGcgagtctGGtatGCTGAACGTTCACTTCAATTCAAGAGATTGAAGTGAATGAACGTTCATTTTGct  
cgagctggcgaattcc  
>CD\_NM\_021071:499

CgCctGcgagtctGGtatGAAGGGTCTGAGGTTGCAATTATTCAAGAGATAATTGCAACCTCAGAACCCTCTTTTTGct  
cgagctggcgaattcc  
>CD\_NM\_021071:1110  
CgCctGcgagtctGGtatGCCCCTATGAGCTGTTTAAAGTTTTCAAGAGAACTTTAAACAGCTCATAGGGATTTTTGct  
cgagctggcgaattcc  
>CD\_NM\_021071.2:1106  
CgCctGcgagtctGGtatGACCTCCCTATGAGCTGTTTAAATTCAAGAGATTTAAACAGCTCATAGGGAGGGTTTTGct  
cgagctggcgaattcc  
>CD\_NM\_021071.2:929  
CgCctGcgagtctGGtatGAACGAAGGATGTCCACTTTAATTTCAAGAGAATTAAAGTGGACATCCTTCGTCTTTTTGct  
cgagctggcgaattcc  
>CD\_NM\_021071.2:860  
CgCctGcgagtctGGtatGCGCAATCCAGCTGCTGAGGAAATTTCAAGAGATTTCCCTCAGCAGCTGGATTGCTTTTTGct  
cgagctggcgaattcc  
>CD\_NM\_021071.2:1178  
CgCctGcgagtctGGtatGCACTGGGAACCTGAGCACATATTTCAAGAGAATATGTGCTCAGGTTCCAGTTTTTTGct  
cgagctggcgaattcc  
>CD\_NM\_021071.2:1165  
CgCctGcgagtctGGtatGCGCAGTTGAGGTCAACTGGGAATTTCAAGAGATTTCCAGTTGACCTCAACTGCATTTTTGct  
cgagctggcgaattcc  
>CD\_NM\_021071.2:1053  
CgCctGcgagtctGGtatGCCCTGCCCTGGGTGCACCTGTACTTCAAGAGAGTACAGGTGCACCCAGGCAGGTTTTTTGct  
cgagctggcgaattcc  
>CD\_NM\_021071.2:492  
CgCctGcgagtctGGtatGACCACAGAGGGTCTGAGGTTGTTCAAGAGACAACCTCAGAACCCTCTGTGGGTTTTTTGct  
cgagctggcgaattcc  
>CD\_NM\_021071.2:1030  
CgCctGcgagtctGGtatGCCCAGACACTATTTACCATATTTTTCAAGAGAAATATGGTAAATAGTGTCTGGTTTTTTGct  
cgagctggcgaattcc  
>CD\_NM\_021071.2:666  
CgCctGcgagtctGGtatGAACTTAGCCTGGCTTAACCAAGTTCAAGAGACTTGGTTAAGCCAGGCTAAGTTTTTGct  
cgagctggcgaattcc  
>CD\_NM\_021071.2:1109  
CgCctGcgagtctGGtatGCCCCTATGAGCTGTTTAAAGTTTTCAAGAGAACTTTAAACAGCTCATAGGGATTTTTGct  
cgagctggcgaattcc  
>CD\_NM\_021071.2:821  
CgCctGcgagtctGGtatGCTCATTCCACTTCAAATATTTATTCAAGAGATAAATATTTGAAGTGAATGAATTTTTGct  
cgagctggcgaattcc  
>CD\_NM\_021071.2:577  
CgCctGcgagtctGGtatGCACAGGTTATGGAGAACTAACTTCAAGAGAGTTAGTTTCTCCATAACCTGTTTTTTGct  
cgagctggcgaattcc  
>CD\_NM\_021071.2:714  
CgCctGcgagtctGGtatGCCACACACGCTGTGGCTATTTTTCAAGAGAAAATAGCCACAGCGTGTGTGGTTTTTTGct  
cgagctggcgaattcc  
>CD\_NM\_021071.2:878  
CgCctGcgagtctGGtatGAAAAGACAGCATCATGGAGAATTTCAAGAGAATTCTCCATGATGCTGTCTTTCTTTTTGct  
cgagctggcgaattcc  
>CD\_NM\_021071.2:985  
CgCctGcgagtctGGtatGCCCTCTCCACATCCCTCCTGAATTTCAAGAGATTCAGGAGGGATGTGGAGAGGATTTTTGct  
cgagctggcgaattcc  
>CD\_NM\_021071.2:373  
CgCctGcgagtctGGtatGAATTGATCAACAGATGCAAGAATTTCAAGAGATTTCTGCATCTGTTGATCAATGTTTTGct  
cgagctggcgaattcc  
>CD\_NM\_021071.2:1104

CgCctGcgagtctGGtatGCTCCCTCCCTATGAGCTGTTTATTCAAGAGATAAACAGCTCATAGGGAGGGATTTTTTGct  
cgagctggcgaattcc  
>CD\_NM\_021071.2:992  
CgCctGcgagtctGGtatGAACATCCCTCCTGAAAGAAGAGTTCAAGAGACTCTTCTTTCAGGAGGGATGTGTTTTTGct  
cgagctggcgaattcc  
>CD\_NM\_021071.2:865  
CgCctGcgagtctGGtatGCCAGCTGCTGAGGAAAGACAGTTCAAGAGACTGTCTTTCCTCAGCAGCTGGATTTTTTGct  
cgagctggcgaattcc  
>CD\_NM\_021071.2:743  
CgCctGcgagtctGGtatGCACATTGAACAGCAATGTTTCATTTCAAGAGAATGAACATTGCTGTTCAATGTATTTTTGct  
cgagctggcgaattcc  
>CD\_NM\_021071.2:621  
CgCctGcgagtctGGtatGAACATAGAAGCCCAGAAGAATTTTCAAGAGAAATCTTCTGGGCTTCTATGTCTTTTTGct  
cgagctggcgaattcc  
>CD\_NM\_021071.2:500  
CgCctGcgagtctGGtatGAGGTTCTGAGGTTGCAATTAATTTCAAGAGATTTAATTGCAACCTCAGAACCCTTTTTGct  
cgagctggcgaattcc  
>CD\_NM\_021071.2:1070  
CgCctGcgagtctGGtatGCGTACAGTACTTCTCCCTCAAGTTCAAGAGACTTGAGGGAGAAGTACTGTACATTTTTGct  
cgagctggcgaattcc  
>CD\_NM\_021071.2:1072  
CgCctGcgagtctGGtatGCACAGTACTTCTCCCTCAAGAATTTCAAGAGATCTTGAGGGAGAAGTACTGTATTTTTGct  
cgagctggcgaattcc  
>CD\_NM\_021071.2:798  
CgCctGcgagtctGGtatGCGGACTCCACAGCAGTATGAACTTCAAGAGAGTTCATACTGCTGTGGAGTCCTTTTTTGct  
cgagctggcgaattcc  
>CD\_NM\_001679:431  
CgCctGcgagtctGGtatGCACCAGTGACCGCATGGAATATTCAAGAGATATTTCCAATGCGGTCACTGGTTTTTTGct  
cgagctggcgaattcc  
>CD\_NM\_001679:884  
CgCctGcgagtctGGtatGCTGCTCCTAACAACTGGGAATTTCAAGAGATTTCCAGTGTGTTAGGAGCAATTTTTGct  
cgagctggcgaattcc  
>CD\_NM\_001679.2:546  
CgCctGcgagtctGGtatGATCACAGTCTGTCTGATGGAGTTCAAGAGACTCCATCAGGACAGACTGTGAGTTTTTGct  
cgagctggcgaattcc  
>CD\_NM\_001679.2:356  
CgCctGcgagtctGGtatGACTTCAGACTCTCAACGATGAGTTCAAGAGACTCATCGTTGAGAGTCTGAAGCTTTTTGct  
cgagctggcgaattcc  
>CD\_NM\_001679.2:587  
CgCctGcgagtctGGtatGCCAGTTTATGTTGCATGTCAGTTCAAGAGACTGACATGCAACATAAACTGGATTTTTGct  
cgagctggcgaattcc  
>CD\_NM\_001679.2:737  
CgCctGcgagtctGGtatGAATAGATTGTGTTTCAAAGAATTTCAAGAGAATCTTTGAAACACAATCTATCTTTTTGct  
cgagctggcgaattcc  
>CD\_NM\_001679.2:785  
CgCctGcgagtctGGtatGCCCTCATAATGGAATGATAGACTTCAAGAGAGTCTATCATTCCATTATGAGGATTTTTGct  
cgagctggcgaattcc  
>CD\_NM\_001679.2:454  
CgCctGcgagtctGGtatGAATTCAGTAGGTTGATCCAACCTTCAAGAGAGTTGGATCAGACCTACTGAATGTTTTGct  
cgagctggcgaattcc  
>CD\_NM\_001679.2:600  
CgCctGcgagtctGGtatGACATGTCAGTTTCTATTTTCAAGAGAATGAAATAGGAACTGACATGCTTTTTGct  
cgagctggcgaattcc  
>CD\_NM\_001679.2:783

CgCctGcgagtctGGtatGCATCCTCATAATGGAATGATAGTTCAAGAGACTATCATTCCATTATGAGGATATTTTTGct  
cgagctggcgaattcc  
>CD\_NM\_001679.2:435  
CgCctGcgagtctGGtatGATGACCGCATTGGAATATACATTTCAAGAGAATGTATATTCCAATGCGGTCACTTTTTgct  
cgagctggcgaattcc  
>CD\_NM\_001679.2:223  
CgCctGcgagtctGGtatGCGCTCTTCATCTACAACCCGACTTCAAGAGAGTTCGGGTTGTAGATGAAGAGCTTTTTTgct  
cgagctggcgaattcc  
>CD\_NM\_001679.2:602  
CgCctGcgagtctGGtatGCTGTCAGTTTCCTATTTTCAATTATTCAAGAGATAATGAAATAGGAAACTGACATTTTTTgct  
cgagctggcgaattcc  
>CD\_NM\_001679.2:322  
CgCctGcgagtctGGtatGCGGCTGCACTCTTCTCATTCACTTCAAGAGAGTGAATGAGAAGAGTGCAGCCATTTTTGct  
cgagctggcgaattcc  
>CD\_NM\_001679.2:325  
CgCctGcgagtctGGtatGATGCACTCTTCTCATTACGATTTCAAGAGAATCGTGAATGAGAAGAGTGCAGTTTTTgct  
cgagctggcgaattcc  
>CD\_NM\_001679.2:911  
CgCctGcgagtctGGtatGCACAGTTGAGTGCAAGATTGATTTCAAGAGAATCAATCTTGCCTCAACTGTTTTTTgct  
cgagctggcgaattcc  
>CD\_NM\_001679.2:281  
CgCctGcgagtctGGtatGAGGTTTGATCTTGCTCTTCTACTTCAAGAGAGTAGAAGAGCAAGATCAAACCTTTTTGct  
cgagctggcgaattcc  
>CD\_NM\_001679.2:456  
CgCctGcgagtctGGtatGCTCAGTAGGCTGATCCAACCTTTTCAAGAGAAAGTTGGATCAGACCTACTGAATTTTTGct  
cgagctggcgaattcc  
>CD\_NM\_001679.2:341  
CgCctGcgagtctGGtatGAACGATGTGGGTTATGCTTCAGTTCAAGAGACTGAAGCATAACCCACATCGTGTTTTTGct  
cgagctggcgaattcc  
>CD\_NM\_001679.2:433  
CgCctGcgagtctGGtatGAAGTGACCGCATTGGAATATACTTCAAGAGAGTATATTCCAATGCGGTCACGTTTTTGct  
cgagctggcgaattcc  
>CD\_NM\_001679.2:918  
CgCctGcgagtctGGtatGAAGTGCAAGATTGATGGATCAGTTCAAGAGACTGATCCATCAATCTTGCCTTTTTTgct  
cgagctggcgaattcc  
>CD\_NM\_001679.2:743  
CgCctGcgagtctGGtatGCTGTGTTTCAAAGAATGAAGATTTCAAGAGAATCTTCATTCTTTGAAACACAATTTTTGct  
cgagctggcgaattcc  
>CD\_NM\_001679.2:585  
CgCctGcgagtctGGtatGAGTCCAGTTTATGTTGCATGTCTTCAAGAGAGACATGCAACATAAACTGGACCTTTTTGct  
cgagctggcgaattcc  
>CD\_NM\_001679.2:629  
CgCctGcgagtctGGtatGCGCATGCAGTGGTATGAATGATTTCAAGAGAATCATTACATCCACTGCATGCTTTTTTgct  
cgagctggcgaattcc  
>CD\_NM\_001679.2:674  
CgCctGcgagtctGGtatGCAACCTTGTATTCTTGTGAAATTCAAGAGATTTCAACAAGAATACAAGGGTTTTTTTTgct  
cgagctggcgaattcc  
>CD\_NM\_001679.2:202  
CgCctGcgagtctGGtatGCCAGAGCCTGGCCGAGTGAATTCAAGAGATTCCTACTCGGCCAGGCTCTGGTTTTTTGct  
cgagctggcgaattcc  
>CD\_NM\_001679.2:518  
CgCctGcgagtctGGtatGCCATATACTTTAGAAGAACAGTTCAAGAGACTGTTCTTCTAAAGTATATGGTTTTTTGct  
cgagctggcgaattcc  
>CD\_NM\_001679.2:774

CgCctGcgagtctGGtatGATAGCAGTTTATCCTCATAATGTTCAAGAGACATTATGAGGATAAACTGCTACTTTTTGct  
cgagctggcgaattcc  
>CD\_NM\_001679.2:582  
CgCctGcgagtctGGtatGCAGGGTCCAGTTTATGTTGCATTTCAAGAGAATGCAACATAAACTGGACCCTTTTTTTGct  
cgagctggcgaattcc  
>CD\_NM\_001679.2:950  
CgCctGcgagtctGGtatGCAGTCAGGATGATCGTGACAAGTTCAAGAGACTTGTACGATCATCCTGACTTTTTTTGct  
cgagctggcgaattcc  
>CD\_NM\_001679.2:360  
CgCctGcgagtctGGtatGAAGACTCTCAACGATGAGGTTCTTCAAGAGAGAACCCTCATCGTTGAGAGTCTGTTTTTTGct  
cgagctggcgaattcc  
>CD\_NM\_001679.2:218  
CgCctGcgagtctGGtatGATGGAAGCTCTTCATCTACAACCTTCAAGAGAGTTGTAGATGAAGAGCTTCCACTTTTTGct  
cgagctggcgaattcc  
>CD\_NM\_001679.2:496  
CgCctGcgagtctGGtatGCAGACCTTAAGAAGTTTCTAAATTCAAGAGATTTAGAACTTCTTAAGGTCTTTTTTTGct  
cgagctggcgaattcc  
>CD\_NM\_014257:1186  
CgCctGcgagtctGGtatGCGTGCCAGTGGCTGGAACGCACATTTCAAGAGATGTCGTTCCAGCCACTGCCACTTTTTTTGct  
cgagctggcgaattcc  
>CD\_NM\_014257:1051  
CgCctGcgagtctGGtatGCGGATGGGACTTTCAGACCTAATTCAAGAGATTAGGTCTGAAAGTCCCATCCATTTTTTTGct  
cgagctggcgaattcc  
>CD\_NM\_014257:1247  
CgCctGcgagtctGGtatGACGCAGCCTGCTTCAGAGACGATTTCAAGAGATCGTCTCTGAAGCAGGCTGCGGTTTTTTGct  
cgagctggcgaattcc  
>CD\_NM\_014257.3:971  
CgCctGcgagtctGGtatGAGCCCAGCTCGTCGTAATCAAATTTCAAGAGATTTGATTACGACGAGCTGGGCCTTTTTTTGct  
cgagctggcgaattcc  
>CD\_NM\_014257.3:895  
CgCctGcgagtctGGtatGCCCAAGGAACTGTTACTTCAATTTCAAGAGAATGAAGTAACAGTTTCTTGGATTTTTTTGct  
cgagctggcgaattcc  
>CD\_NM\_014257.3:300  
CgCctGcgagtctGGtatGCGCTCCCTAAGTCAGGAACAATTTCAAGAGAATTTGTTCTGACTTAGGGAGCTTTTTTTGct  
cgagctggcgaattcc  
>CD\_NM\_014257.3:1055  
CgCctGcgagtctGGtatGAGGACTTTCAGACCTAATCAGTTCAAGAGACTGATTTAGGTCTGAAAGTCCCTTTTTTTGct  
cgagctggcgaattcc  
>CD\_NM\_014257.3:1186  
CgCctGcgagtctGGtatGATGGCAGTGGCTGGAACGACAATTTCAAGAGATTGTCGTTCCAGCCACTGCCACTTTTTTTGct  
cgagctggcgaattcc  
>CD\_NM\_014257.3:576  
CgCctGcgagtctGGtatGATGGGTGAGTTGCCAGAGAAATTTCAAGAGAATTTCTCTGGCAACTCACCCACTTTTTTTGct  
cgagctggcgaattcc  
>CD\_NM\_014257.3:438  
CgCctGcgagtctGGtatGATGGGTGAGTTGCCAGAGAAATTTCAAGAGAATTTCTCTGGCAACTCACCCACTTTTTTTGct  
cgagctggcgaattcc  
>CD\_NM\_014257.3:507  
CgCctGcgagtctGGtatGATGGGTGAGTTGCCAGAGAAATTTCAAGAGAATTTCTCTGGCAACTCACCCACTTTTTTTGct  
cgagctggcgaattcc  
>CD\_NM\_014257.3:714  
CgCctGcgagtctGGtatGATGGGTGAGTTGCCAGAGAAATTTCAAGAGAATTTCTCTGGCAACTCACCCACTTTTTTTGct  
cgagctggcgaattcc  
>CD\_NM\_014257.3:645

CgCctGcgagtctGGtatGATGGGTGAGTTGCCAGAGAAATTTCAAGAGAATTTCTCTGGCAACTCACCCACTTTTTTGct  
cgagctggcgaattcc  
>CD\_NM\_014257.3:195  
CgCctGcgagtctGGtatGCCTACAGGGTGTCTTGGCCATGTTCAAGAGACATGGCCAAGACACCCCTGTAGATTTTTTGct  
cgagctggcgaattcc  
>CD\_NM\_014257.3:1112  
CgCctGcgagtctGGtatGATCACCCAGCTTCCAGCGGTACTTCAAGAGAGTACCGCTGGAAGCTGGGTGACTTTTTTGct  
cgagctggcgaattcc  
>CD\_NM\_014257.3:883  
CgCctGcgagtctGGtatGCCTGGACATTTCTTCCAAGGAAATTTCAAGAGATTTCTTGGGAAGAATGTCCAGTTTTTTGct  
cgagctggcgaattcc  
>CD\_NM\_014257.3:365  
CgCctGcgagtctGGtatGCGCAGTGGGTGAGCTCTCAGAGTTCAAGAGACTCTGAGAGCTCACCCACTGCATTTTTTGct  
cgagctggcgaattcc  
>CD\_NM\_014257.3:572  
CgCctGcgagtctGGtatGCGCAGTGGGTGAGTTGCCAGAGTTCAAGAGACTCTGGCAACTCACCCACTGCATTTTTTGct  
cgagctggcgaattcc  
>CD\_NM\_014257.3:779  
CgCctGcgagtctGGtatGCGCAGTGGGTGAGTTGCCAGACTTCAAGAGAGTCTGGCAACTCACCCACTGCATTTTTTGct  
cgagctggcgaattcc  
>CD\_NM\_014257.3:503  
CgCctGcgagtctGGtatGCGCAGTGGGTGAGTTGCCAGAGTTCAAGAGACTCTGGCAACTCACCCACTGCATTTTTTGct  
cgagctggcgaattcc  
>CD\_NM\_014257.3:710  
CgCctGcgagtctGGtatGCGCAGTGGGTGAGTTGCCAGAGTTCAAGAGACTCTGGCAACTCACCCACTGCATTTTTTGct  
cgagctggcgaattcc  
>CD\_NM\_014257.3:434  
CgCctGcgagtctGGtatGCGCAGTGGGTGAGTTGCCAGAGTTCAAGAGACTCTGGCAACTCACCCACTGCATTTTTTGct  
cgagctggcgaattcc  
>CD\_NM\_014257.3:641  
CgCctGcgagtctGGtatGCGCAGTGGGTGAGTTGCCAGAGTTCAAGAGACTCTGGCAACTCACCCACTGCATTTTTTGct  
cgagctggcgaattcc  
>CD\_NM\_014257.3:159  
CgCctGcgagtctGGtatGAACTTTCAATTCAGCAGATACTTCAAGAGAGTATCTGCTGGAATTGAAAGTCTTTTTTGct  
cgagctggcgaattcc  
>CD\_NM\_014257.3:968  
CgCctGcgagtctGGtatGAAGGGCCCAGCTCGTCTGTAATCTTCAAGAGAGATTACGACGAGCTGGGCCCTCTTTTTTGct  
cgagctggcgaattcc  
>CD\_NM\_014257.3:157  
CgCctGcgagtctGGtatGAAGACTTTCAATTCAGCAGATTTCAAGAGAATCTGCTGGAATTGAAAGTCTTTTTTGct  
cgagctggcgaattcc  
>CD\_NM\_014257.3:956  
CgCctGcgagtctGGtatGATGCCAGGAAGTGAGGGCCCAGTTCAAGAGACTGGGCCCTCACTTCTTGGCAGTTTTTGct  
cgagctggcgaattcc  
>CD\_NM\_014257.3:449  
CgCctGcgagtctGGtatGACCAGAGAAATCCAAGCTGCAGTTCAAGAGACTGCAGCTTGGATTTCTCTGGCTTTTTTGct  
cgagctggcgaattcc  
>CD\_NM\_014257.3:656  
CgCctGcgagtctGGtatGACCAGAGAAATCCAAGCTGCAGTTCAAGAGACTGCAGCTTGGATTTCTCTGGCTTTTTTGct  
cgagctggcgaattcc  
>CD\_NM\_014257.3:518  
CgCctGcgagtctGGtatGACCAGAGAAATCCAAGCTGCAGTTCAAGAGACTGCAGCTTGGATTTCTCTGGCTTTTTTGct  
cgagctggcgaattcc  
>CD\_NM\_014257.3:725



CgCctGcgagtctGGtatGACCAGAGAAATCCAAGCTGCAGTTCAAGAGACTGCAGCTTGGATTTCTCTGGCTTTTTTGct  
cgagctggcgaattcc  
>CD\_NM\_014257.3:380  
CgCctGcgagtctGGtatGATCAGAGAAATCCAAGCTGCAGTTCAAGAGACTGCAGCTTGGATTTCTCTGAGTTTTTGct  
cgagctggcgaattcc  
>CD\_NM\_014257.3:587  
CgCctGcgagtctGGtatGACCAGAGAAATCCAAGCTGCAGTTCAAGAGACTGCAGCTTGGATTTCTCTGGCTTTTTTGct  
cgagctggcgaattcc  
>CD\_XM\_046925:1061  
CgCctGcgagtctGGtatGAACCAAGGGAGGTGGAGGTGGATTCAAGAGATCCACCTCCACCTCCCTTGGTGTTTTTGct  
cgagctggcgaattcc  
>CD\_XM\_046925:733  
CgCctGcgagtctGGtatGACGGCCAAGACCTCAACAATCATTCAAGAGATGATTGTTGAGGTCTTGGCCGCTTTTTTGct  
cgagctggcgaattcc  
>CD\_XM\_046925:688  
CgCctGcgagtctGGtatGCCC GTTCCCGGCATCAACGTTTCAAGAGAACGTTGATGCCGGGAACACGGATTTTTTGct  
cgagctggcgaattcc  
>CD\_XM\_046925:1193  
CgCctGcgagtctGGtatGAAGATTACAGTGTGATAAGGAATTC AAGAGATTCCTTATCACACTGTAATCTGTTTTTGct  
cgagctggcgaattcc  
>CD\_NM\_007261.2:423  
CgCctGcgagtctGGtatGAAGTGTCCCTATGAGAAGGAAC TCAAGAGAGTTCCTTCTCATAGGGACACTGTTTTTGct  
cgagctggcgaattcc  
>CD\_NM\_007261.2:1193  
CgCctGcgagtctGGtatGCGATTACAGTGTGATAAGGAAGTTCAAGAGACTTCCTTATCACACTGTAATCTTTTTTGct  
cgagctggcgaattcc  
>CD\_NM\_007261.2:587  
CgCctGcgagtctGGtatGACTGGAGAATCTCACAGAGGAGTTCAAGAGACTCCTCTGTGAGATTCTCCAGTTTTTGct  
cgagctggcgaattcc  
>CD\_NM\_007261.2:992  
CgCctGcgagtctGGtatGAACGCAGAGTGAGCTGCACTACTTCAAGAGAGTAGTGCAGCTCACTCTGCGTGTTTTTTGct  
cgagctggcgaattcc  
>CD\_NM\_007261.2:763  
CgCctGcgagtctGGtatGCTCCACCTGTATCATCCACTACTTCAAGAGAGTAGTGGATGATACAGGTGGAATTTTTTGct  
cgagctggcgaattcc  
>CD\_NM\_007261.2:1129  
CgCctGcgagtctGGtatGCGGTGTTTGATTCTAACACCAATTC AAGAGATTGGTGTTAGAATCAAACACCATTTTTTGct  
cgagctggcgaattcc  
>CD\_NM\_007261.2:878  
CgCctGcgagtctGGtatGAGCATTGTTGCTGCTTCTGTTGTTCAAGAGACAACAGAAGCAGCAACAATGCCTTTTTTGct  
cgagctggcgaattcc  
>CD\_NM\_007261.2:863  
CgCctGcgagtctGGtatGACTCCTCTCCCTGCTGGCATTGTTCAAGAGACAATGCCAGCAGGGAGAGGAGCTTTTTTGct  
cgagctggcgaattcc  
>CD\_NM\_007261.2:578  
CgCctGcgagtctGGtatGAACAGTGACCCTGGAGAATCTCTTCAAGAGAGAGATTCTCCAGGGTCACTGTGTTTTTGct  
cgagctggcgaattcc  
>CD\_NM\_007261.2:425  
CgCctGcgagtctGGtatGATGTCCCTATGAGAAGGAACACTTCAAGAGAGTGTTCCTTCTCATAGGGACACTTTTTTGct  
cgagctggcgaattcc  
>CD\_NM\_007261.2:1199  
CgCctGcgagtctGGtatGAAGTGTGATAAGGAAGACATAGTTCAAGAGACTATGTCTTCCTTATCACACTGTTTTTGct  
cgagctggcgaattcc  
>CD\_NM\_007261.2:733

CgCtGcgagtctGGtatGAGGCCAAGACCTCAACAATCACTTCAAGAGAGTGATTGTTGAGGTCTTGCCGTTTTTGct  
cgagctggcgaattcc  
>CD\_NM\_007261.2:917  
CgCtGcgagtctGGtatGCGCCTGGAGGATGTTTCAGAAATTCAGAGATTTCTGAAACATCCTCCAGGCTTTTTTGct  
cgagctggcgaattcc  
>CD\_NM\_007261.2:656  
CgCtGcgagtctGGtatGATTTTCATGATCCCGTTGTGCGAGTTCAAGAGACTCGACAACGGGATCATGAAAGTTTTTGct  
cgagctggcgaattcc  
>CD\_NM\_007261.2:419  
CgCtGcgagtctGGtatGCGTGCAGTGTCCTATGAGAAGTTCAAGAGACTTCTCATAGGGACACTGCACATTTTTTGct  
cgagctggcgaattcc  
>CD\_NM\_007261.2:553  
CgCtGcgagtctGGtatGAGGACAGTCCTGCAAACCTCAGTTCAAGAGACTGAGGTTTGCAGGACTGTCCTTTTTGct  
cgagctggcgaattcc  
>CD\_NM\_007261.2:753  
CgCtGcgagtctGGtatGCCAACTGCATTTCCACCTGTATTTCAAGAGAATACAGGTGGAAATGCAGTTGTTTTTGct  
cgagctggcgaattcc  
>CD\_NM\_007261.2:910  
CgCtGcgagtctGGtatGACCTGCTAGCCTGGAGGATGTTTTCAAGAGAAACATCCTCCAGGCTAGCAGGTTTTTGct  
cgagctggcgaattcc  
>CD\_NM\_007261.2:803  
CgCtGcgagtctGGtatGAACCCACAGTGCCAGCATCCAGTTCAAGAGACTGGATGCTGGCACTGTGGGTGTTTTTGct  
cgagctggcgaattcc  
>CD\_NM\_007261.2:442  
CgCtGcgagtctGGtatGCACACAGGACCCTCAACAAATATTCAAGAGATATTTGTTGAGGGTCTGTGTTTTTTTGct  
cgagctggcgaattcc  
>CD\_NM\_007261.2:919  
CgCtGcgagtctGGtatGACTGGAGGATGTTTCAGAAATGTTCAAGAGACATTTCTGAAACATCCTCCAGGTTTTTGct  
cgagctggcgaattcc  
>CD\_NM\_007261.2:730  
CgCtGcgagtctGGtatGATGCGCCAAGACCTCAACAATTTCAAGAGAATTGTTGAGGTCTTGCCGCAGTTTTTGct  
cgagctggcgaattcc  
>CD\_NM\_007261.2:942  
CgCtGcgagtctGGtatGCTCAAAGCTGGTGACCATTCAGTTCAAGAGACTGAATGGTCACCAGCTTTGATTTTTTGct  
cgagctggcgaattcc  
>CD\_NM\_007261.2:809  
CgCtGcgagtctGGtatGAAGTGCCAGCATCCAGGAGGAATTCAGAGATTCCTCCTGGATGCTGGCACTGTTTTTGct  
cgagctggcgaattcc  
>CD\_NM\_007261.2:1124  
CgCtGcgagtctGGtatGATCGGTGGTGTGTTGATTCTAACTTCAAGAGAGTTAGAATCAAACACCACCGAGTTTTTGct  
cgagctggcgaattcc  
>CD\_NM\_007261.2:776  
CgCtGcgagtctGGtatGCTCCACTACCCTGTTTGCAGTGTTCAAGAGACTGCAAACAGGGTAGTGGATTTTTTGct  
cgagctggcgaattcc  
>CD\_NM\_007261.2:696  
CgCtGcgagtctGGtatGACGGCATCAACGTCAATGACACTTCAAGAGAGTGTCATTGACGTTGATGCCGTTTTTGct  
cgagctggcgaattcc  
>CD\_NM\_007261.2:1195  
CgCtGcgagtctGGtatGCTTACAGTGATAAGGAAGACTTCAAGAGAGTCTTCCTTATCACACTGTAATTTTTTGct  
cgagctggcgaattcc  
>CD\_NM\_007261.2:1180  
CgCtGcgagtctGGtatGCGGAACCAGATTCAGATTACAGTTCAAGAGACTGTAATCTGAATCTGGTTCCTTTTTTGct  
cgagctggcgaattcc  
>CD\_NM\_174892:561

CgCctGcgagtctGGtatGCACCACTACATGCTCCTGGTATTTCAAGAGAATACCAGGAGCATGTAGTGGTTTTTTTTGct  
cgagctggcgaattcc  
>CD\_NM\_174892:667  
CgCctGcgagtctGGtatGCACAGCCTATCTACATGAACCTTTTCAAGAGAAAGTTCATGTAGATAGGCTGTTTTTTTTGct  
cgagctggcgaattcc  
>CD\_NM\_174892:207  
CgCctGcgagtctGGtatGCCCTGACGGTCAATGCCACTTTCAAGAGAAGTGGCATTGAACCGTCAGGGATTTTTTGct  
cgagctggcgaattcc  
>CD\_NM\_174892.1:686  
CgCctGcgagtctGGtatGCTCTCCGAACCTCTGACTAAAGTTCAAGAGACTTTAGTCAGAGGTTCCGAGAATTTTTGct  
cgagctggcgaattcc  
>CD\_NM\_174892.1:147  
CgCctGcgagtctGGtatGACCTCTCAGGCTGTTTCTCCATTTCAAGAGAATGGAGAAACAGCCTGAGAGGCTTTTTGct  
cgagctggcgaattcc  
>CD\_NM\_174892.1:337  
CgCctGcgagtctGGtatGACGTGTGTCCATCAAGGACAATTTCAAGAGAATGTCTTGATGGACACACGGTTTTTGct  
cgagctggcgaattcc  
>CD\_NM\_174892.1:460  
CgCctGcgagtctGGtatGCCAAGTGAAAGTGATCGTTGACTTCAAGAGAGTCAACGATCACTTTCACTTGATTTTTGct  
cgagctggcgaattcc  
>CD\_NM\_174892.1:331  
CgCctGcgagtctGGtatGAAGTGACCGTGTGTCCATCAAGTTCAAGAGACTTGATGGACACACGGTCACTTTTTTGct  
cgagctggcgaattcc  
>CD\_NM\_174892.1:449  
CgCctGcgagtctGGtatGAACCTTGGGACTCAAGTGAAAGTTCAAGAGACTTTCACTTGAGTCCCAAGGCTTTTTTGct  
cgagctggcgaattcc  
>CD\_NM\_174892.1:422  
CgCctGcgagtctGGtatGCGGTGTGGGATTGAAAGAAGAGTTCAAGAGACTCTTCTTTCAATCCCACACCATTTTTGct  
cgagctggcgaattcc  
>CD\_NM\_174892.1:534  
CgCctGcgagtctGGtatGAAGTGTTCATCGGCTCCCACAATTTCAAGAGATTGTGGGAGCCGATGAACACTGTTTTTGct  
cgagctggcgaattcc  
>CD\_NM\_174892.1:283  
CgCctGcgagtctGGtatGCACATGCAAGATCCTCATTGAATTTCAAGAGATTCAATGAGGATCTTGCATGTATTTTTGct  
cgagctggcgaattcc  
>CD\_NM\_174892.1:688  
CgCctGcgagtctGGtatGATCCGAACCTCTGACTAAAGACTTTCAAGAGAGTCTTTAGTCAGAGGTTCCGAGTTTTTGct  
cgagctggcgaattcc  
>CD\_NM\_174892.1:637  
CgCctGcgagtctGGtatGATCTCAGAGGGTCCCTGAGGAGTTCAAGAGACTCCTCAGGGACCTCTGAGACTTTTTTGct  
cgagctggcgaattcc  
>CD\_NM\_174892.1:141  
CgCctGcgagtctGGtatGCTCTCAGCCTCTCAGGCTGTTTTTCAAGAGAAAACAGCCTGAGAGGCTGAGAATTTTTGct  
cgagctggcgaattcc  
>CD\_NM\_174892.1:205  
CgCctGcgagtctGGtatGATCCCTGACGGTCAATGCCACTTTCAAGAGAGTGGCATTGAACCGTCAGGGACTTTTTGct  
cgagctggcgaattcc  
>CD\_NM\_174892.1:547  
CgCctGcgagtctGGtatGATCCACAAGAGGAACCACTACTTCAAGAGAGTAGTGGTTCTCTTGTGGGAGTTTTTGct  
cgagctggcgaattcc  
>CD\_NM\_174892.1:211  
CgCctGcgagtctGGtatGAACGGTCAATGCCACTATAAGTTCAAGAGACTTATAGTGGCATTGAACCGTCTTTTTGct  
cgagctggcgaattcc  
>CD\_NM\_174892.1:370

CgCctGcgagtctGGtatGAACGTTCACTGTGACCATGGAGTTCAAGAGACTCCATGGTCACAGTGAACGTGTTTTTGct  
cgagctggcgaattcc  
>CD\_NM\_174892.1:343  
CgCctGcgagtctGGtatGATCCATCAAGGACAATCAGAAATTCAGAGATTTCTGATTGTCCTTGATGGACTTTTTTGct  
cgagctggcgaattcc  
>CD\_NM\_174892.1:537  
CgCctGcgagtctGGtatGCGTTCATCGGCTCCCACAAGAGTTCAAGAGACTCTTGTGGGAGCCGATGAACATTTTTTGct  
cgagctggcgaattcc  
>CD\_NM\_174892.1:613  
CgCctGcgagtctGGtatGAACTGCCATCCTCTGGTTGAAGTTCAAGAGACTTCAACCAGAGGATGGCAGTGTTTTTTGct  
cgagctggcgaattcc  
>CD\_NM\_174892.1:290  
CgCctGcgagtctGGtatGCAGATCCTCATTGAAACCAGAGTTCAAGAGACTCTGGTTTCAATGAGGATCTTTTTTTGct  
cgagctggcgaattcc  
>CD\_NM\_174892.1:363  
CgCctGcgagtctGGtatGCAGACCGCACGTTCACTGTGACTTCAAGAGAGTCACAGTGAACGTGCGGTCTTTTTTTGct  
cgagctggcgaattcc  
>CD\_NM\_174892.1:454  
CgCctGcgagtctGGtatGCGGGACTCAAGTGAAAGTGATCTTCAAGAGAGATCACTTTCACTTGAGTCCATTTTTTGct  
cgagctggcgaattcc  
>CD\_NM\_174892.1:664  
CgCctGcgagtctGGtatGAGAACAGCCTATCTACATGAACTTCAAGAGAGTTCATGTAGATAGGCTGTTCTTTTTTGct  
cgagctggcgaattcc  
>CD\_NM\_174892.1:305  
CgCctGcgagtctGGtatGCCAGAGGGTCGGAGCAAGGAGTTCAAGAGACTCCTTGCTCCGACCTCTGGTTTTTTTGct  
cgagctggcgaattcc  
>CD\_NM\_174892.1:666  
CgCctGcgagtctGGtatGCACAGCCTATCTACATGAACTTTTCAAGAGAAAGTTCATGTAGATAGGCTGTTTTTTTGct  
cgagctggcgaattcc  
>CD\_NM\_174892.1:483  
CgCctGcgagtctGGtatGAAGAGGGAGCGGCTCCACAACCTTCAAGAGAGTTGTGGAAGCCGCTCCCTCTGTTTTTTGct  
cgagctggcgaattcc  
>CD\_NM\_174892.1:580  
CgCctGcgagtctGGtatGCTTTGTGAAGGTGCCATCTTGTTCAGAGACAAGATGGGCACCTTCACAAATTTTTTTGct  
cgagctggcgaattcc  
>CD\_NM\_174892.1:234  
CgCctGcgagtctGGtatGCAGGATGGGAGACCTACATTAATTCAGAGATTAATGTAGGTCTCCCATCCTTTTTTTGct  
cgagctggcgaattcc  
>CD\_NM\_174892.1:416  
CgCctGcgagtctGGtatGATTTACTGGTGTGGGATTGAAATTCAGAGATTTCAATCCCACACCAGTAAACTTTTTTGct  
cgagctggcgaattcc  
>CD\_NM\_174892.1:641  
CgCctGcgagtctGGtatGAAGAGGGTCCCTGAGGAGCCAGTTCAAGAGACTGGCTCCTCAGGGACCTCTGTTTTTTGct  
cgagctggcgaattcc  
>CD\_NM\_006678:537  
CgCctGcgagtctGGtatGAACCACAGATTCTCCGATGTGATTCAAGAGATCACATCGGAGAATCTGTGGTGTTTTTTGct  
cgagctggcgaattcc  
>CD\_NM\_006678:539  
CgCctGcgagtctGGtatGACACAGATTCTCCGATGTGACATTCAGAGATGTCACATCGGAGAATCTGTGGTTTTTTGct  
cgagctggcgaattcc  
>CD\_NM\_006678.2:537  
CgCctGcgagtctGGtatGCCACAGATTCTCCGATGTGACTTCAAGAGAGTCACATCGGAGAATCTGTGGTTTTTTGct  
cgagctggcgaattcc  
>CD\_NM\_006678.2:539

CgCctGcgagtctGGtatGAACAGATTCTCCGATGTGACAATTCAAGAGATTGTCACATCGGAGAATCTGTGTTTTTGct  
cgagctggcgaattcc  
>CD\_NM\_006678.2:983  
CgCctGcgagtctGGtatGATCAGAGAAGCTCTAGAAGCAGTTCAAGAGACTGCTTCTAGAGCTTCTCTGAGTTTTTGct  
cgagctggcgaattcc  
>CD\_NM\_006678.2:484  
CgCctGcgagtctGGtatGAAGTGTGCTATGAGAAGGAACCTCAAGAGAGTTCCCTTCTCATAGCGACACTGTTTTTGct  
cgagctggcgaattcc  
>CD\_NM\_006678.2:882  
CgCctGcgagtctGGtatGACCTGGCTCCCTGTTTCAGCAATTTCAAGAGAATTGCTGAACAGGGAGCCAGGGTTTTTGct  
cgagctggcgaattcc  
>CD\_NM\_006678.2:648  
CgCctGcgagtctGGtatGACTGGAGAATCTCACAGAGGAGTTCAAGAGACTCCTCTGTGAGATTCTCCAGTTTTTGct  
cgagctggcgaattcc  
>CD\_NM\_006678.2:717  
CgCctGcgagtctGGtatGATTTTCATGATCCCATTTGTCGAGTTCAAGAGACTCGACAATGGGATCATGAAAGTTTTTGct  
cgagctggcgaattcc  
>CD\_NM\_006678.2:837  
CgCctGcgagtctGGtatGATGGCCCAGCGTGACCAGAAAGTTCAAGAGACTTCTGTTTACGCTGGGCCAGTTTTTGct  
cgagctggcgaattcc  
>CD\_NM\_006678.2:878  
CgCctGcgagtctGGtatGAACACCCTGGCTCCCTGTTTCAGTTCAAGAGACTGAACAGGGAGCCAGGGTGTTTTTTGct  
cgagctggcgaattcc  
>CD\_NM\_006678.2:639  
CgCctGcgagtctGGtatGAACAGTGACCCTGGAGAATCTCTTCAAGAGAGAGATTCTCCAGGGTCACTGTGTTTTTGct  
cgagctggcgaattcc  
>CD\_NM\_006678.2:486  
CgCctGcgagtctGGtatGATGTGCTATGAGAAGGAACACTTCAAGAGAGTGTTCCTTCTCATAGCGACACTTTTTTGct  
cgagctggcgaattcc  
>CD\_NM\_006678.2:480  
CgCctGcgagtctGGtatGCGTGCAGTGTGCTATGAGAAGTTCAAGAGACTTCTCATAGCGACACTGCACATTTTTTGct  
cgagctggcgaattcc  
>CD\_NM\_006678.2:405  
CgCctGcgagtctGGtatGACTCCTGCTTGTCCAGGCTATTTCAAGAGAATAGCCTGGGACAAGCAGGAGTTTTTGct  
cgagctggcgaattcc  
>CD\_NM\_006678.2:959  
CgCctGcgagtctGGtatGATGCCGTCTCTGGGTGAACAGTTCAAGAGACTGTTTACCCAGAGGACGGCACTTTTTTGct  
cgagctggcgaattcc  
>CD\_NM\_006678.2:396  
CgCctGcgagtctGGtatGCGCTCTGCTCCTCCTGCTTGTCTTCAAGAGAGACAAGCAGGAGGAGCAGAGCTTTTTTGct  
cgagctggcgaattcc  
>CD\_NM\_006678.2:614  
CgCctGcgagtctGGtatGAGGACAGTCTGCAAACCTCAGTTCAAGAGACTGAGGTTTGCAGGACTGTCCCTTTTTTGct  
cgagctggcgaattcc  
>CD\_NM\_006678.2:699  
CgCctGcgagtctGGtatGCACACCGTGGCTCCGAGACTTTTTCAAGAGAAAAGTCTCGGAGCCACGGTGTATTTTTTGct  
cgagctggcgaattcc  
>CD\_NM\_006678.2:503  
CgCctGcgagtctGGtatGCACACAGGACCCTCAACAAATTTTCAAGAGAAATTTGTTGAGGGTCTGTGTTTTTTTGct  
cgagctggcgaattcc  
>CD\_NM\_006678.2:544  
CgCctGcgagtctGGtatGCTTCTCCGATGTGACAAGATTGTTCAAGAGACAATCTTGTACATCGGAGAATTTTTTGct  
cgagctggcgaattcc  
>CD\_NM\_006678.2:1014

CgCtGcgagtctGGtatGACCCAAGGGTGAGAACCAGTAGTTCAAGAGACTACTGGTTCTCACCTTGGGCTTTTTGct  
cgagctggcgaattcc  
>CD\_NM\_006678.2:407  
CgCtGcgagtctGGtatGCCCTGCTTGTCCCAGGCTATTTTTCAAGAGAAAATAGCCTGGGACAAGCAGATTTTTGct  
cgagctggcgaattcc  
>CD\_NM\_006678.2:512  
CgCtGcgagtctGGtatGACCTCAACAAATCTGGTGCAGTTCAAGAGACTGCACCAGAATTTGTTGAGGGTTTTGct  
cgagctggcgaattcc  
>CD\_NM\_006678.2:635  
CgCtGcgagtctGGtatGACTTACAGTGACCCTGGAGAATTCAGAGATTCTCCAGGGTCACTGTGAAGCTTTTTGct  
cgagctggcgaattcc  
>CD\_NM\_006678.2:637  
CgCtGcgagtctGGtatGCTCACAGTGACCCTGGAGAATCTTCAAGAGAGATTCTCCAGGGTCACTGTGAATTTTTGct  
cgagctggcgaattcc  
>CD\_NM\_006678.2:705  
CgCtGcgagtctGGtatGATGGCTCCGAGACTTTCATGATTTCAAGAGAATCATGAAAGTCTCGGAGCCACTTTTTGct  
cgagctggcgaattcc  
>CD\_NM\_006678.2:555  
CgCtGcgagtctGGtatGCGACAAGATTGTGGAGACCAAATTCAGAGATTTGGTCTCCACAATCTTGTCATTTTGct  
cgagctggcgaattcc  
>CD\_NM\_006678.2:912  
CgCtGcgagtctGGtatGACTGCTCCTGGTCTCTTGGAGTTCAAGAGACTCCAAGAGGACCAGGAGCAGTTTTGct  
cgagctggcgaattcc  
>CD\_NM\_006678.2:633  
CgCtGcgagtctGGtatGAAGCTTACAGTGACCCTGGAGTTCAAGAGACTCCAGGGTCACTGTGAAGCTTTTTGct  
cgagctggcgaattcc  
>CD\_NM\_006678.2:830  
CgCtGcgagtctGGtatGCGCACACCTGGCCCAGCGTGACTTCAAGAGAGTCACGCTGGGCCAGGTGTGCATTTTTGct  
cgagctggcgaattcc  
>CD\_NM\_006678.2:723  
CgCtGcgagtctGGtatGCGATCCCATTGTGCGAGTTGAGTTCAAGAGACTCAACCTCGACAATGGGATCATTTTTGct  
cgagctggcgaattcc  
>CD\_NM\_006678.2:957  
CgCtGcgagtctGGtatGAGGTGCCGTCTCTGGGTGAACTTCAAGAGAGTTCACCCAGAGGACGGCACCTTTTTGct  
cgagctggcgaattcc  
>CD\_XM\_292587:201  
CgCtGcgagtctGGtatGCACGACACGTCATGTGAGAGCATTCAAGAGATGCTCTCACATGACGTGTCGTATTTTTGct  
cgagctggcgaattcc  
>CD\_XM\_292587:225  
CgCtGcgagtctGGtatGATGGAGACCAAGGGAGAAGAGATTCAAGAGATCTTCTCCCTTGGTCTCCACTTTTTGct  
cgagctggcgaattcc  
>CD\_XM\_292587:334  
CgCtGcgagtctGGtatGCTGCTGGATCTTACTGGTGAATTCAGAGATTGCACCAGTAAGATCCAGCATTTTTGct  
cgagctggcgaattcc  
>CD\_XM\_292587:388  
CgCtGcgagtctGGtatGAACGCGATCCCTCGGACCTGGTTTTCAAGAGAACCAGGTCCGAGGGATCGCGTTTTGct  
cgagctggcgaattcc  
>CD\_XM\_292587:389  
CgCtGcgagtctGGtatGCCGCGATCCCTCGGACCTGGTTTTCAAGAGAAACCAGGTCCGAGGGATCGCGTTTTGct  
cgagctggcgaattcc  
>CD\_XM\_292587:561  
CgCtGcgagtctGGtatGCTCCTGCTCGTGGTCTTCTGATTCAAGAGATCAGAAGGACCACGAGCAGGAATTTTTGct  
cgagctggcgaattcc  
>CD\_NM\_181449.1:310

CgCctGcgagtctGGtatGAATGCAGAACCTCAATGAAGATTTCAAGAGAATCTTCATTGAGGTTCTGCATGTTTTTGct  
cgagctggcgaattcc  
>CD\_NM\_181449.1:203  
CgCctGcgagtctGGtatGAACACGTCATGTGAGAGCATTGTTCAAGAGACAATGCTCTCACATGACGTGTCTTTTTTGct  
cgagctggcgaattcc  
>CD\_NM\_181449.1:132  
CgCctGcgagtctGGtatGATCTGACAGTGTGGTGTGTCAGTATTCAAGAGATACTGACACCACACTGTCAGAGTTTTTGct  
cgagctggcgaattcc  
>CD\_NM\_181449.1:320  
CgCctGcgagtctGGtatGATCAATGAAGATGATGCTGGATTTCAAGAGAATCCAGCATCATCTTCATTGAGTTTTTGct  
cgagctggcgaattcc  
>CD\_NM\_181449.1:145  
CgCctGcgagtctGGtatGATGTCAGTATGAGAGCATGTACTTCAAGAGAGTACATGCTCTCATACTGACACTTTTTTGct  
cgagctggcgaattcc  
>CD\_NM\_181449.1:469  
CgCctGcgagtctGGtatGCCCCATCTTCTGGTGGTGAAC TTCAAGAGAGTTCACCACCAGGAAGATGGGATTTTTTGct  
cgagctggcgaattcc  
>CD\_NM\_181449.1:130  
CgCctGcgagtctGGtatGATCTCTGACAGTGTGGTGTGTCAGTTCAAGAGACTGACACCACACTGTCAGAGAGTTTTTGct  
cgagctggcgaattcc  
>CD\_NM\_181449.1:238  
CgCctGcgagtctGGtatGCGAAGAGAAGGTGGAGAGGAATTTCAAGAGAATTCCTCTCCACCTTCTCTTTTTTGct  
cgagctggcgaattcc  
>CD\_NM\_181449.1:562  
CgCctGcgagtctGGtatGACTGCTCGTGGTCTTCTGAAGTTCAAGAGACTTCAGAAGGACCACGAGCAGGTTTTTGct  
cgagctggcgaattcc  
>CD\_NM\_181449.1:66  
CgCctGcgagtctGGtatGCTCTCTGCCCTCAGGCTGTTTTTCAAGAGAAAACAGCCTGAGAGGCAGAGAATTTTTTGct  
cgagctggcgaattcc  
>CD\_NM\_181449.1:225  
CgCctGcgagtctGGtatGCGGAGACCAAGGGAGAAGAGAATTC AAGAGATTCTCTTCTCCCTTGGTCTCCATTTTTTGct  
cgagctggcgaattcc  
>CD\_NM\_181449.1:153  
CgCctGcgagtctGGtatGCTGAGAGCATGTACAAGGGATATTC AAGAGATATCCCTTGTACATGCTCTCATTTTTTGct  
cgagctggcgaattcc  
>CD\_NM\_181449.1:134  
CgCctGcgagtctGGtatGATGACAGTGTGGTGTGTCAGTATGTTCAAGAGACATACTGACACCACACTGTCAGTTTTTGct  
cgagctggcgaattcc  
>CD\_NM\_181449.1:295  
CgCctGcgagtctGGtatGAGCCTTCACTGTGACCATGCAGTTCAAGAGACTGCATGGTCCACAGTGAAGGCGTTTTTGct  
cgagctggcgaattcc  
>CD\_NM\_181449.1:635  
CgCctGcgagtctGGtatGAAGTGGGCTCCTCCTGGAAGATTTCAAGAGAATCTTCCAGGAGGAGCCCACTGTTTTTGct  
cgagctggcgaattcc  
>CD\_NM\_181449.1:553  
CgCctGcgagtctGGtatGACCTCACTTCTGCTCGTGGTCTTCAAGAGAGACCACGAGCAGGAAGTGAGGGTTTTTGct  
cgagctggcgaattcc  
>CD\_NM\_181449.1:297  
CgCctGcgagtctGGtatGACTTCACTGTGACCATGCAGAATTC AAGAGATTCTGCATGGTCCACAGTGAAGGTTTTTGct  
cgagctggcgaattcc  
>CD\_NM\_181449.1:606  
CgCctGcgagtctGGtatGCGGGTGTGCTTCTGGGTGAATTC AAGAGATTCAACCAGAAGACAGCACCCATTTTTTGct  
cgagctggcgaattcc  
>CD\_NM\_181449.1:262

CgCctGcgagtctGGtatGACGCGTGTCCATCAGAGACCACTTCAAGAGAGTGGTCTCTGATGGACACGCGGTTTTTGct  
cgagctggcgaattcc  
>CD\_NM\_181449.1:402  
CgCctGcgagtctGGtatGCCCTGGTTAGGGTGTATGTTTCTTCAAGAGAGAAACATACACCCTAACCAGGTTTTTTGct  
cgagctggcgaattcc  
>CD\_NM\_181449.1:198  
CgCctGcgagtctGGtatGCGTACGACACGTCATGTGAGAGTTCAAGAGACTCTCACATGACGTGTCGTACTTTTTTGct  
cgagctggcgaattcc  
>CD\_NM\_181449.1:301  
CgCctGcgagtctGGtatGAACTGTGACCATGCAGAACCTCTTCAAGAGAGAGGTTCTGCATGGTCACAGTGTTTTTGct  
cgagctggcgaattcc  
>CD\_NM\_181449.1:314  
CgCctGcgagtctGGtatGAAGAACCTCAATGAAGATGATGTTCAAGAGACATCATCTTCATTGAGGTTCTGTTTTTGct  
cgagctggcgaattcc  
>CD\_NM\_181449.1:397  
CgCctGcgagtctGGtatGATCGGACCTGGTTAGGGTGTATTTCAAGAGAATACACCCTAACCAGGTCCGAGTTTTTGct  
cgagctggcgaattcc  
>CD\_NM\_181449.1:361  
CgCctGcgagtctGGtatGAACAGTGTGGGTCCTGGATTCAATTCAAGAGATGAATCCAGGACCCACACTGTCTTTTTGct  
cgagctggcgaattcc  
>CD\_NM\_181449.1:629  
CgCctGcgagtctGGtatGCGGCCTCAGTGGGCTCCTCCTGTTCAAGAGACAGGAGGAGCCCACTGAGGCCTTTTTTGct  
cgagctggcgaattcc  
>CD\_NM\_181449.1:147  
CgCctGcgagtctGGtatGATCAGTATGAGAGCATGTACAATTCAAGAGATTGTACATGCTCTCATACTGACTTTTTTGct  
cgagctggcgaattcc  
>CD\_NM\_139018:144  
CgCctGcgagtctGGtatGAAGGCTACTCCATTGTCACTCATTCAAGAGATGAGTGACAATGGAGTAGCCTGTTTTTGct  
cgagctggcgaattcc  
>CD\_NM\_139018:211  
CgCctGcgagtctGGtatGAACCGTGCAGTGTGTTTACAGATTCAAGAGATCTGTAAACACACTGCACGGTCTTTTTGct  
cgagctggcgaattcc  
>CD\_NM\_139018:336  
CgCctGcgagtctGGtatGCCC GGTGTCCATCAAGGACAATTCAAGAGATTGTCTTTGATGGACACCCGGTTTTTTGct  
cgagctggcgaattcc  
>CD\_NM\_139018.2:410  
CgCctGcgagtctGGtatGATGACACTTACTGGTGTGGAATTTCAAGAGAATTCCACACCAGTAAGTGTGAGTTTTTGct  
cgagctggcgaattcc  
>CD\_NM\_139018.2:459  
CgCctGcgagtctGGtatGAACAGTTCAAGTGACCATTGACTTCAAGAGAGTCAATGGTCACTTGAAGTGTGTTTTTGct  
cgagctggcgaattcc  
>CD\_NM\_139018.2:114  
CgCctGcgagtctGGtatGAACACTCTACCTGCTCCTCTTCTTCAAGAGAGAAGAGGAGCAGGTAGAGTGTCTTTTTGct  
cgagctggcgaattcc  
>CD\_NM\_139018.2:211  
CgCctGcgagtctGGtatGCCC GGTGCAGTGTGTTTACAGATTTCAAGAGAATCTGTAAACACACTGCACGGTTTTTTGct  
cgagctggcgaattcc  
>CD\_NM\_139018.2:856  
CgCctGcgagtctGGtatGATGACCTTGGGTGCTGAGGATCTTCAAGAGAGATCCTCAGCACCCAAGGTCAGTTTTTGct  
cgagctggcgaattcc  
>CD\_NM\_139018.2:630  
CgCctGcgagtctGGtatGAGCTTGGAGGATGATGAAGTACTTCAAGAGAGTACTTCATCATCTCCAAGCCTTTTTGct  
cgagctggcgaattcc  
>CD\_NM\_139018.2:336



CgCctGcgagtctGGtatGACGGGTGCCATCAAGGACAATTTCAAGAGAATTGTCCTTGATGGACACCCGGTTTTTGct  
cgagctggcgaattcc  
>CD\_NM\_139018.2:546  
CgCctGcgagtctGGtatGAAGGCACAAGCTCCTGAAGCTCTTCAAGAGAGAGCTTCAGGAGCTTGTGCCTGTTTTTGct  
cgagctggcgaattcc  
>CD\_NM\_139018.2:412  
CgCctGcgagtctGGtatGAACACTTACTGGTGTGGAATTGTTCAAGAGACAATTCACACCAGTAAGTGTCTTTTTTGct  
cgagctggcgaattcc  
>CD\_NM\_139018.2:786  
CgCctGcgagtctGGtatGAGTTGACCAGGTGGAAGTGAATTCAAGAGATTCCACTTCCACCTGGTCAACCTTTTTTGct  
cgagctggcgaattcc  
>CD\_NM\_139018.2:933  
CgCctGcgagtctGGtatGACCTGAGGAGCCCACGGAATACTTCAAGAGAGTATCCGTGGGCTCCTCAGGGTTTTTGct  
cgagctggcgaattcc  
>CD\_NM\_139018.2:623  
CgCctGcgagtctGGtatGAACTCTTGGCTTGGAGGATGATTTCAAGAGAATCATCCTCCAAGCCAAGAGTGTTTTTTGct  
cgagctggcgaattcc  
>CD\_NM\_139018.2:369  
CgCctGcgagtctGGtatGAACGTTCACTGTGACCATGGAGTTCAAGAGACTCCATGGTCACAGTGAACGTGTTTTTTGct  
cgagctggcgaattcc  
>CD\_NM\_139018.2:342  
CgCctGcgagtctGGtatGATCCATCAAGGACAATCAGAAATTTCAAGAGATTTCTGATTGTCCTTGATGGACTTTTTTGct  
cgagctggcgaattcc  
>CD\_NM\_139018.2:852  
CgCctGcgagtctGGtatGCTCTCTGACCTTGGGTGCTGAGTTCAAGAGACTCAGCACCCAAGGTCAGAGATTTTTTGct  
cgagctggcgaattcc  
>CD\_NM\_139018.2:833  
CgCctGcgagtctGGtatGCGGAGGACATTTCCCTATGCATCTTCAAGAGAGATGCATAGGAAATGTCTCCTTTTTTGct  
cgagctggcgaattcc  
>CD\_NM\_139018.2:122  
CgCctGcgagtctGGtatGCCCTGCTCCTCTTCTGGCTCTCTTCAAGAGAGAGAGCCAGAAGAGGAGCAGGTTTTTGct  
cgagctggcgaattcc  
>CD\_NM\_139018.2:330  
CgCctGcgagtctGGtatGAAGGGACCGGTGTCCATCAAGTTCAAGAGACTTGATGGACACCCGGTCCCTTTTTTGct  
cgagctggcgaattcc  
>CD\_NM\_139018.2:233  
CgCctGcgagtctGGtatGAAGGCTGGGAGACCTACTTGAATTTCAAGAGATTTCAAGTAGGTCTCCCAGCCTGTTTTTGct  
cgagctggcgaattcc  
>CD\_NM\_139018.2:828  
CgCctGcgagtctGGtatGACCGAAGGAGGACATTTCCCTATTTCAAGAGAATAGGAAATGTCTCCTTCGGCTTTTTTGct  
cgagctggcgaattcc  
>CD\_NM\_139018.2:149  
CgCctGcgagtctGGtatGCCTCCATTGTCACCTCAAATCACTTCAAGAGAGTGATTTGAGTGACAAATGGAGTTTTTGct  
cgagctggcgaattcc  
>CD\_NM\_139018.2:282  
CgCctGcgagtctGGtatGCGACTGCAAGATCCTTGTTAAATTTCAAGAGATTTAACAAGGATCTTGCAGTCATTTTTGct  
cgagctggcgaattcc  
>CD\_NM\_139018.2:617  
CgCctGcgagtctGGtatGACGCCTCACTCTTGGCTTGGAGTTCAAGAGACTCCAAGCCAAGAGTGAGGCGTTTTTGct  
cgagctggcgaattcc  
>CD\_NM\_139018.2:375  
CgCctGcgagtctGGtatGAACTGTGACCATGGAGGATCTCTTCAAGAGAGAGATCCTCCATGGTCACAGTGTTTTTTGct  
cgagctggcgaattcc  
>CD\_NM\_139018.2:146

CgCctGcgagtctGGtatGACTACTCCATTGTCACTCAAATTTCAAGAGAATTTGAGTGACAATGGAGTAGCTTTTTTGct  
cgagctggcgaattcc  
>CD\_NM\_139018.2:204  
CgCctGcgagtctGGtatGATCCTTGACCGTGCAGTGTGTTTTCAAGAGAAACACACTGCACGGTCAAGGAGTTTTTGct  
cgagctggcgaattcc  
>CD\_NM\_139018.2:281  
CgCctGcgagtctGGtatGATGACTGCAAGATCCTTGTTAATTCAAGAGATTAACAAGGATCTTGCAGTCACTTTTTTGct  
cgagctggcgaattcc  
>CD\_NM\_139018.2:627  
CgCctGcgagtctGGtatGATTGGCTTGAGGATGATGAAGTTCAAGAGACTTCATCATCCTCCAAGCCAAGTTTTTGct  
cgagctggcgaattcc  
>CD\_NM\_139018.2:931  
CgCctGcgagtctGGtatGAGCCCTGAGGAGCCCACGGAATTTCAAGAGAATTCCTGTTGGCTCCTCAGGGCCTTTTTTGct  
cgagctggcgaattcc  
>CD\_NM\_139018.2:525  
CgCctGcgagtctGGtatGAACCGGCCACCACCTTGACAACCTCAAGAGAGTTGTCCAAGTGGTGGCCGGTCTTTTTTGct  
cgagctggcgaattcc  
>CD\_NM\_145273:885  
CgCctGcgagtctGGtatGCCGGAGACACAGAGGAACGAGATTCAAGAGATCTCGTTCCTCTGTGTCTCCGTTTTTTTGct  
cgagctggcgaattcc  
>CD\_NM\_145273:610  
CgCctGcgagtctGGtatGCCGGGCACGAAAGGACTTCTCATTCAAGAGATGAGAAGTCCTTTCGTGCCCGTTTTTTTGct  
cgagctggcgaattcc  
>CD\_NM\_145273:227  
CgCctGcgagtctGGtatGCGGCACCATCTATGCAGAAGAATTCAAGAGATTCCTTCTGCATAGATGGTGCCATTTTTTGct  
cgagctggcgaattcc  
>CD\_NM\_145273:92  
CgCctGcgagtctGGtatGCGCCCTGGAGGGCCCAGAGGAATTCAAGAGATTCCTTCTGGGCCCTCAGGGCCTTTTTTGct  
cgagctggcgaattcc  
>CD\_NM\_145273:1005  
CgCctGcgagtctGGtatGAAGGAGCTGGGCTTCTCGAAGTTTTCAAGAGAACTTCGAGAAGCCCAGCTCCTTTTTTGct  
cgagctggcgaattcc  
>CD\_NM\_145273.2:312  
CgCctGcgagtctGGtatGCTGTGACCCTGTGGAACCTCACTTCAAGAGAGTGAGGTTCCACAGGGTCACAATTTTTTGct  
cgagctggcgaattcc  
>CD\_NM\_145273.2:753  
CgCctGcgagtctGGtatGCGCCCAGGGTGTCCATCCCGATTTCAAGAGAATCGGGATGGACACCCTGGGCTTTTTTTGct  
cgagctggcgaattcc  
>CD\_NM\_145273.2:227  
CgCctGcgagtctGGtatGAGCACCATCTATGCAGAAGAAGTTCAAGAGACTTCTTCTGCATAGATGGTGCCTTTTTTGct  
cgagctggcgaattcc  
>CD\_NM\_145273.2:67  
CgCctGcgagtctGGtatGCTGCCTGCTGCTCCCAGGTTATTTCAAGAGAATAACCTGGGAGCAGCAGGCAATTTTTTGct  
cgagctggcgaattcc  
>CD\_NM\_145273.2:129  
CgCctGcgagtctGGtatGAGGACACTGTGTCCCTGCAGTGTTCAGAGACACTGCAGGGACACAGTGTCCCTTTTTTGct  
cgagctggcgaattcc  
>CD\_NM\_145273.2:906  
CgCctGcgagtctGGtatGCGTTCCTGCTCTCACGCTTCAAGAGAGTCAAGCGTGAGAGGCAGAACTTTTTTTGct  
cgagctggcgaattcc  
>CD\_NM\_145273.2:1018  
CgCctGcgagtctGGtatGATCGAAGTTTGTCTCAGCGTAGTTCAAGAGACTACGCTGAGACAAACTTCGAGTTTTTTGct  
cgagctggcgaattcc  
>CD\_NM\_145273.2:210

CgCctGcgagtctGGtatGCCTTCTCTCGCTGCTCTGGCACTTCAAGAGAGTGCCAGAGCAGCGAGAGAAGATTTTTGct  
cgagctggcgaattcc  
>CD\_NM\_145273.2:223  
CgCctGcgagtctGGtatGATCTGGCACCATCTATGCAGAATTCAAGAGATTCTGCATAGATGGTGCCAGAGTTTTGct  
cgagctggcgaattcc  
>CD\_NM\_145273.2:825  
CgCctGcgagtctGGtatGAAGGCCTGATCGCCTTCTGCAGTTCAAGAGACTGCAGAAGGCGATCAGGCCTGTTTTGct  
cgagctggcgaattcc  
>CD\_NM\_145273.2:885  
CgCctGcgagtctGGtatGAGGAGACACAGAGGAACGAGAATTCAAGAGATTCTCGTTCCTCTGTGTCTCCGTTTTGct  
cgagctggcgaattcc  
>CD\_NM\_145273.2:306  
CgCctGcgagtctGGtatGAGCTCATTGTGACCCTGTGGAATTCAAGAGATTCACAGGGTCACAATGAGCGTTTTGct  
cgagctggcgaattcc  
>CD\_NM\_145273.2:846  
CgCctGcgagtctGGtatGACCACCTGCTCCTGTGGAGAAATTCAAGAGATTTCTCCACAGGAGCAGGTGGCTTTTTGct  
cgagctggcgaattcc  
>CD\_NM\_145273.2:732  
CgCctGcgagtctGGtatGATCTCAGCAGTGGCAGCTCTAATTCAAGAGATTAGAGCTGCCACTGCTGAGAGTTTTGct  
cgagctggcgaattcc  
>CD\_NM\_145273.2:103  
CgCctGcgagtctGGtatGACCAGAGGAAATCAGCGGGTTCTTCAAGAGAGAACCCGCTGATTTCTCTGGTTTTGct  
cgagctggcgaattcc  
>CD\_NM\_145273.2:722  
CgCctGcgagtctGGtatGCCAGTCCAGCTCTCAGCAGTGTTCAGAGACACTGCTGAGAGCTGGACTGGTTTTGct  
cgagctggcgaattcc  
>CD\_NM\_145273.2:394  
CgCctGcgagtctGGtatGCCTGATCTCTCTGTTTCGTCTTTTTCAAGAGAAAAGACGAACAGAGAGATCAGTTTTGct  
cgagctggcgaattcc  
>CD\_NM\_145273.2:138  
CgCctGcgagtctGGtatGCGTCCCTGCAGTGCACCTACAGTTCAAGAGACTGTAGGTGCACTGCAGGGACATTTTTGct  
cgagctggcgaattcc  
>CD\_NM\_145273.2:471  
CgCctGcgagtctGGtatGAACGCCTGCAGCCCAAGGCAAATTCAAGAGATTTGCCTTGGGCTGCAGGCGTTTTGct  
cgagctggcgaattcc  
>CD\_NM\_145273.2:615  
CgCctGcgagtctGGtatGCCGAAAGGACTTCTCAGTACACTTCAAGAGAGTGTACTGAGAAGTCCTTTCGTTTTGct  
cgagctggcgaattcc  
>CD\_NM\_145273.2:997  
CgCctGcgagtctGGtatGCTCTGAGGAGGAGCTGGGCTTCTTCAAGAGAGAAGCCAGCTCCTCCTCAGATTTTTGct  
cgagctggcgaattcc  
>CD\_NM\_145273.2:174  
CgCctGcgagtctGGtatGCCACCGGAAGTACTGGTGCAGTTCAAGAGACTGCACCAGTACTTCCGGTGGTTTTGct  
cgagctggcgaattcc  
>CD\_NM\_145273.2:292  
CgCctGcgagtctGGtatGACGCCAGGAGCTCTCGCTCATTTCAGAGAAATGAGCGAGAGCTCCTGGCGTTTTGct  
cgagctggcgaattcc  
>CD\_NM\_145273.2:230  
CgCctGcgagtctGGtatGCCATCTATGCAGAAGAAGAAGTTCAAGAGACTTCTTCTTCTGCATAGATGGTTTTGct  
cgagctggcgaattcc  
>CD\_NM\_145273.2:813  
CgCctGcgagtctGGtatGCTCTGTCAGCCGAGGCCTGATTTCAAGAGAATCAGGCCTGCGGCTGACAGAATTTTTGct  
cgagctggcgaattcc  
>CD\_NM\_145273.2:1005

CgCctGcgagtctGGtatGCGGAGCTGGGCTTCTCGAAGTTTTCAAGAGAAACTTCGAGAAGCCCAGCTCCTTTTTTTGct  
cgagctggcgaattcc  
>CD\_NM\_145273.2:71  
CgCctGcgagtctGGtatGATGCTGCTCCCAGGTTATGAAGTTCAAGAGACTTCATAACCTGGGAGCAGCAGTTTTTTGct  
cgagctggcgaattcc  
>CD\_NM\_145273.2:177  
CgCctGcgagtctGGtatGCCCAGGACTGCTGGTGCAGGAATTCAGAGATTCCTGCACCAGTACTTCCGGTTTTTTGct  
cgagctggcgaattcc  
>CD\_NM\_006344:465  
CgCctGcgagtctGGtatGAATCTGTGTGGTTGGATTCCAATTCAGAGATTGGAATCCAACCACACAGATTTTTTTGct  
cgagctggcgaattcc  
>CD\_NM\_006344:941  
CgCctGcgagtctGGtatGCCGCCACCTGGTGGTCATCAATTCAGAGATTGATGACCACCAGGTGGGCGTTTTTTGct  
cgagctggcgaattcc  
>CD\_NM\_006344:595  
CgCctGcgagtctGGtatGAAAGAAACGATAGCATCTCTGATTCAAGAGATCAGAGATGCTATCGTTTCTTTTTTTGct  
cgagctggcgaattcc  
>CD\_NM\_006344:1137  
CgCctGcgagtctGGtatGCGGCGAGGACTGTGCTCACTTCTTCAAGAGAGAAGTGAGCACAGTCCTCGCCTTTTTTTGct  
cgagctggcgaattcc  
>CD\_NM\_006344:327  
CgCctGcgagtctGGtatGACAGTACTTGGAGAATAAGGTGTTCAAGAGACACCTTATTCTCCAAGTACTGGTTTTTTGct  
cgagctggcgaattcc  
>CD\_NM\_006344:300  
CgCctGcgagtctGGtatGCAGCATGACAAGGACGTATGAATTCAGAGATTCATACGTCCTTGTGCATGCTTTTTTTGct  
cgagctggcgaattcc  
>CD\_NM\_182906.2:719  
CgCctGcgagtctGGtatGCTCTGTGTGTGCCAGTTCATTTCAAGAGAATGAACTGGGACACACACAGATTTTTTTGct  
cgagctggcgaattcc  
>CD\_NM\_182906.2:323  
CgCctGcgagtctGGtatGATTCCAGTACTTGGAGAATAAGTTCAAGAGACTTATTCTCCAAGTACTGGAAGTTTTTTGct  
cgagctggcgaattcc  
>CD\_NM\_182906.2:800  
CgCctGcgagtctGGtatGAGTGGCTACTCTCAACAACAATTTCAAGAGAATTGTTGTTGAGAGTAGCCACCTTTTTTTGct  
cgagctggcgaattcc  
>CD\_NM\_182906.2:941  
CgCctGcgagtctGGtatGAGCCCACCTGGTGGTCATCAACTTCAGAGAGTTGATGACCACCAGGTGGGCGTTTTTTGct  
cgagctggcgaattcc  
>CD\_NM\_182906.2:465  
CgCctGcgagtctGGtatGCTCTGTGTGGTTGGATTCCAATTCAGAGATTGGAATCCAACCACACAGATTTTTTTGct  
cgagctggcgaattcc  
>CD\_NM\_182906.2:758  
CgCctGcgagtctGGtatGCGTCCAGCAGCTGGTGCAGACTTCAGAGAGTCTTGCACCAGCTGCTGGACTTTTTTTGct  
cgagctggcgaattcc  
>CD\_NM\_182906.2:580  
CgCctGcgagtctGGtatGCGGGCAGCAGCTTGAAGAAACTTCAGAGAGTTTCTTCCAAGCTGCTGCCCTTTTTTTGct  
cgagctggcgaattcc  
>CD\_NM\_182906.2:602  
CgCctGcgagtctGGtatGAATAGCATCTCTGAAAGCTGAGTTCAAGAGACTCAGCTTTCAGAGATGCTATTTTTTTGct  
cgagctggcgaattcc  
>CD\_NM\_182906.2:461  
CgCctGcgagtctGGtatGAATCATCTGTGTGGTTGGATTCTTCAAGAGAGAATCCAACCACACAGATGATTTTTTTGct  
cgagctggcgaattcc  
>CD\_NM\_182906.2:585

CgCtGcgagtctGGtatGCGCAGCTTGAAGAAACGATAGTTCAAGAGACTATCGTTTCTTCCAAGCTGCTTTTTTgct  
cgagctggcgaattcc  
>CD\_NM\_182906.2:506  
CgCtGcgagtctGGtatGACTGGTGACCTGAGAACAGATTTCAAGAGAATCTGTTCTCAGGGTCACCAGTTTTTgct  
cgagctggcgaattcc  
>CD\_NM\_182906.2:725  
CgCtGcgagtctGGtatGATGTGTCCCAGTTCATTCTGAATTTCAAGAGATTCAGAATGAACTGGGACACACTTTTTGct  
cgagctggcgaattcc  
>CD\_NM\_182906.2:1145  
CgCtGcgagtctGGtatGATGTGCTCACTTCCATCCAGACTTCAAGAGAGTCTGGATGGAAGTGAGCACAGTTTTTgct  
cgagctggcgaattcc  
>CD\_NM\_182906.2:371  
CgCtGcgagtctGGtatGACCACTTCTCTCCAGTCCCTCTTCAAGAGAGAGGGACTGGAGAGGAAGTGGCTTTTTGct  
cgagctggcgaattcc  
>CD\_NM\_182906.2:595  
CgCtGcgagtctGGtatGCAGAAACGATAGCATCTCTGAATTTCAAGAGATTCAGAGATGCTATCGTTCTTTTTTgct  
cgagctggcgaattcc  
>CD\_NM\_182906.2:1017  
CgCtGcgagtctGGtatGCTGGGCCCTCAGTGACCCTGAAGTTCAAGAGACTTCAGGGTCACTGAGGCCATTTTTTgct  
cgagctggcgaattcc  
>CD\_NM\_182906.2:443  
CgCtGcgagtctGGtatGAGGCCTCCTGCTGCTGGTTCATCTTCAAGAGAGATGACCAGCAGCAGGAGGCCGTTTTTgct  
cgagctggcgaattcc  
>CD\_NM\_182906.2:721  
CgCtGcgagtctGGtatGATGTGTGTGTCCCAGTTCATTCTTCAAGAGAGAATGAACTGGGACACACACAGTTTTTgct  
cgagctggcgaattcc  
>CD\_NM\_182906.2:508  
CgCtGcgagtctGGtatGCGGTGACCTGAGAACAGATTTTTTCAAGAGAAAATCTGTTCTCAGGGTCACCATTTTTGct  
cgagctggcgaattcc  
>CD\_NM\_182906.2:542  
CgCtGcgagtctGGtatGATCAAACACTGTGGCGGAGATCTTCAAGAGAGATCTCCGCCACAGTGTGAGTTTTTgct  
cgagctggcgaattcc  
>CD\_NM\_182906.2:1061  
CgCtGcgagtctGGtatGCACAGACTATGCGACCGGCTTCTTCAAGAGAGAAGCCGGTCGCATAGTCTGTTTTTTTTgct  
cgagctggcgaattcc  
>CD\_NM\_182906.2:767  
CgCtGcgagtctGGtatGACTGGTGCAAGACCTGAAGAAATTTCAAGAGATTTCTTCAGGTCTTGCACCAGTTTTTgct  
cgagctggcgaattcc  
>CD\_NM\_182906.2:623  
CgCtGcgagtctGGtatGAGTGGAGGGTTTCAAGCAGGAATTTCAAGAGATTCCTGCTTGAAACCCTCCACCTTTTTGct  
cgagctggcgaattcc  
>CD\_NM\_182906.2:600  
CgCtGcgagtctGGtatGCCGATAGCATCTCTGAAAGCTGTTCAAGAGACAGCTTTCAGAGATGCTATCGTTTTTTTTgct  
cgagctggcgaattcc  
>CD\_NM\_182906.2:845  
CgCtGcgagtctGGtatGACCTGTCAACTGGGTGGAGCACTTCAAGAGAGTCTCCACCCAGTTGACAGGGTTTTTgct  
cgagctggcgaattcc  
>CD\_NM\_182906.2:755  
CgCtGcgagtctGGtatGACGAGTCCAGCAGCTGGTGAATTTCAAGAGATTCACCAGCTGCTGGACTCGTTTTTgct  
cgagctggcgaattcc  
>CD\_NM\_182906.2:726  
CgCtGcgagtctGGtatGCGTGTCCCAGTTCATTCTGAATTTCAAGAGATTTCAAGAATGAACTGGGACACATTTTTGct  
cgagctggcgaattcc  
>CD\_NM\_014880:225

CgCtGcgagtctGGtatGACGGACATGATAAGCATAACATATTCAAGAGATATGTATGCTTATCATGTCCGCTTTTTGct  
cgagctggcgaattcc  
>CD\_NM\_014880.236  
CgCtGcgagtctGGtatGCAGCATAACATAATGAAGAAGAATTCAAGAGATTCTTCTTCATTATGTATGCTTTTTTTGct  
cgagctggcgaattcc  
>CD\_NM\_014880.3:187  
CgCtGcgagtctGGtatGAATAGAGGATGTCAGAAATCAGTTCAAGAGACTGATTTCTGACATCCTCTATGTTTTTTGct  
cgagctggcgaattcc  
>CD\_NM\_014880.3:347  
CgCtGcgagtctGGtatGCTCAAGTGGTTTGATAATTCAATTCAAGAGATTGAATTATCAAACCACTTGAATTTTTGct  
cgagctggcgaattcc  
>CD\_NM\_014880.3:225  
CgCtGcgagtctGGtatGAGGACATGATAAGCATAACATAATTCAAGAGATTATGTATGCTTATCATGTCCGTTTTTTGct  
cgagctggcgaattcc  
>CD\_NM\_014880.3:331  
CgCtGcgagtctGGtatGAACAGATGATGCGAGTTTCAAGTTCAAGAGACTTGAAACTCGCATCATCTGTGTTTTTTGct  
cgagctggcgaattcc  
>CD\_NM\_014880.3:236  
CgCtGcgagtctGGtatGCGCATAACATAATGAAGAAGAATTCAAGAGATTCTTCTTCATTATGTATGCTTTTTTTGct  
cgagctggcgaattcc  
>CD\_NM\_014880.3:104  
CgCtGcgagtctGGtatGATCGCGACTGTCCTTCATCTATTCAAGAGATAGATGAAGGACAGTCCGCGACTTTTTGct  
cgagctggcgaattcc  
>CD\_NM\_014880.3:220  
CgCtGcgagtctGGtatGCGGAGCGGACATGATAAGCATATTCAAGAGATATGCTTATCATGTCCGCTCCATTTTTGct  
cgagctggcgaattcc  
>CD\_NM\_014880.3:343  
CgCtGcgagtctGGtatGAAGTTTCAAGTGGTTTGATAATTTCAAGAGAATTATCAAACCACTTGAAACTCTTTTTGct  
cgagctggcgaattcc  
>CD\_NM\_014880.3:108  
CgCtGcgagtctGGtatGAGGACTGTCCTTCATCTACTTGTTCAGAGACAAGTAGATGAAGGACAGTCCGTTTTTTGct  
cgagctggcgaattcc  
>CD\_NM\_014880.3:137  
CgCtGcgagtctGGtatGCTCCAAGACAGTTGTTACATTTTTCAAGAGAAAATGTAACAACGTCTTGAATTTTTGct  
cgagctggcgaattcc  
>CD\_NM\_014880.3:113  
CgCtGcgagtctGGtatGCGTCCTTCATCTACTTGGATTCTTCAAGAGAGAATCCAAGTAGATGAAGGACATTTTTGct  
cgagctggcgaattcc  
>CD\_NM\_014880.3:470  
CgCtGcgagtctGGtatGCGTGAAGTTTCTTCTGTGGAAGTTCAAGAGACTTCCACAGAAGAACTTACATTTTTGct  
cgagctggcgaattcc  
>CD\_NM\_014880.3:600  
CgCtGcgagtctGGtatGAAGCAATCATTTGGTTCCTGTATTCAAGAGATACAGGAACCAAATGATTGCTCTTTTTGct  
cgagctggcgaattcc  
>CD\_NM\_014880.3:392  
CgCtGcgagtctGGtatGAACCAAGATGATGATGAGGATTTTCAAGAGAAATCCTCATCATCATCTTGGTCTTTTTGct  
cgagctggcgaattcc  
>CD\_NM\_014880.3:604  
CgCtGcgagtctGGtatGCATCATTTGGTTCCTGTACAAATTCAAGAGATTTGTACAGGAACCAAATGATTTTTTTGct  
cgagctggcgaattcc  
>CD\_NM\_014880.3:564  
CgCtGcgagtctGGtatGCGGTGATTGCTAGCACGGTAATTTCAAGAGAATTACCGTGCTAGCAATCACCATTTTTGct  
cgagctggcgaattcc  
>CD\_NM\_014880.3:122

CgCctGcgagtctGGtatGCCTACTTGGATTCAGTTCCAAGTTCAAGAGACTTGGAAGTGAATCCAAGTAGATTTTTTGct  
cgagctggcgaattcc  
>CD\_NM\_014880.3:601  
CgCctGcgagtctGGtatGCGCAATCATTTGGTTCCTGTACTTCAAGAGAGTACAGGAACCAAATGATTGCTTTTTTTGct  
cgagctggcgaattcc  
>CD\_NM\_014880.3:716  
CgCctGcgagtctGGtatGCATGAATATCCTGTTCAATTTGTTCAAGAGACAAATTGAACAGGATATTCATTTTTTTGct  
cgagctggcgaattcc  
>CD\_NM\_014880.3:185  
CgCctGcgagtctGGtatGCGCATAGAGGATGTCAGAAATCTTCAAGAGAGATTTCTGACATCCTCTATGCTTTTTTTGct  
cgagctggcgaattcc  
>CD\_NM\_014880.3:342  
CgCctGcgagtctGGtatGAGAGTTTCAAGTGGTTTGATAATTCAAGAGATTATCAAACCACTTGAAACTCGTTTTTTGct  
cgagctggcgaattcc  
>CD\_NM\_014880.3:215  
CgCctGcgagtctGGtatGAACCATGGAGCGGACATGATAATTCAAGAGATTATCATGTCCGCTCCATGGTCTTTTTTGct  
cgagctggcgaattcc  
>CD\_NM\_014880.3:386  
CgCctGcgagtctGGtatGCGGACAGACCAAGATGATGATGTTCAAGAGACATCATCATCTTGGTCTGTCCATTTTTTGct  
cgagctggcgaattcc  
>CD\_NM\_014880.3:126  
CgCctGcgagtctGGtatGATTGGATTCAGTTCCAAGACAGTTCAAGAGACTGTCTTGGAAGTGAATCCAAGTTTTTTGct  
cgagctggcgaattcc  
>CD\_NM\_014880.3:118  
CgCctGcgagtctGGtatGCTCATCTACTTGGATTCAGTTCTTCAAGAGAGAACTGAATCCAAGTAGATGAATTTTTTGct  
cgagctggcgaattcc  
>CD\_NM\_014880.3:298  
CgCctGcgagtctGGtatGACCAGATGATATCCTACTAGGCTTCAAGAGAGCCTAGTAGGATATCATCTGGGTTTTTTGct  
cgagctggcgaattcc  
>CD\_NM\_014880.3:435  
CgCctGcgagtctGGtatGCGCACATCAAGACAGGTGAATGTTCAAGAGACATTCACCTGTCTTGATGTGCATTTTTTGct  
cgagctggcgaattcc  
>CD\_NM\_014880.3:388  
CgCctGcgagtctGGtatGAACAGACCAAGATGATGATGAGTTCAAGAGACTCATCATCATCTTGGTCTGTCTTTTTTGct  
cgagctggcgaattcc  
>CD\_NM\_014880.3:718  
CgCctGcgagtctGGtatGCGAATATCCTGTTCAATTTGACTTCAAGAGAGTCAAATTGAACAGGATATTCATTTTTTTGct  
cgagctggcgaattcc  
>CD\_NM\_014880.3:293  
CgCctGcgagtctGGtatGCAAGGCCAGATGATATCCTACTTCAAGAGAGTAGGATATCATCTGGGCCTTTTTTTTGct  
cgagctggcgaattcc  
>CD\_NM\_014880.3:627  
CgCctGcgagtctGGtatGCACATTCTGATTCCTCGTTTCACTTCAAGAGAGTGAACGAGAATCAGAATGTTTTTTTTGct  
cgagctggcgaattcc  
>CD\_NM\_130441:992  
CgCctGcgagtctGGtatGATGGCACTCAGGTGAACCAATTTCAAGAGAATTGGGTTACCTGAGTGCCAGTTTTTTGct  
cgagctggcgaattcc  
>CD\_NM\_130441:1063  
CgCctGcgagtctGGtatGAGGGCTGGAATGACATTCAGTTCAAGAGACAGTGAATGTCAATCCAGCCCCTTTTTTGct  
cgagctggcgaattcc  
>CD\_NM\_130441:759  
CgCctGcgagtctGGtatGCTTCAGTCTAGTTGCTACTTTATTCAAGAGATAAAGTAGCAACTAGACTGAAATTTTTTTGct  
cgagctggcgaattcc  
>CD\_NM\_130441:1020

CgCctGcgagtctGGtatGAATGAGCGTTGTGCGATAATAATTCAAGAGATTATTATCGCACAAACGCTCATCTTTTTTGct  
cgagctggcgaattcc  
>CD\_NM\_130441.2:759  
CgCctGcgagtctGGtatGCTCAGTCTAGTTGCTACTTTTATTTCAAGAGAATAAAGTAGCAACTAGACTGAATTTTTTGct  
cgagctggcgaattcc  
>CD\_NM\_130441.2:835  
CgCctGcgagtctGGtatGAGCTGATCTGGTGGTGATCAACTTCAAGAGAGTTGATCACCACCAGATCAGCCTTTTTTGct  
cgagctggcgaattcc  
>CD\_NM\_130441.2:723  
CgCctGcgagtctGGtatGCAGATTGGAGCTGCTGCCCAACTTCAAGAGAGTTGGGCAGCAGCTCCAATCTTTTTTTGct  
cgagctggcgaattcc  
>CD\_NM\_130441.2:1095  
CgCctGcgagtctGGtatGCGAAGTCAATTTGCAAGATGAATTCAAGAGATTCATCTTGCAAATTGACTTCTTTTTTGct  
cgagctggcgaattcc  
>CD\_NM\_130441.2:865  
CgCctGcgagtctGGtatGCGAACAGGATTCATCATTCAAGAGACTGAATGATGAAATCCTGTTCTTTTTTGct  
cgagctggcgaattcc  
>CD\_NM\_130441.2:771  
CgCctGcgagtctGGtatGACTACTTTATTTCTACTGGGATTTCAAGAGAATCCCAGTAGAAATAAAGTAGCTTTTTTGct  
cgagctggcgaattcc  
>CD\_NM\_130441.2:640  
CgCctGcgagtctGGtatGCACTGTCAAGAGGCTGTCCAAGTTCAAGAGACTTGGACAGCCTCTTGACAGTTTTTTTGct  
cgagctggcgaattcc  
>CD\_NM\_130441.2:786  
CgCctGcgagtctGGtatGATGGGATGCAATCTTGGACTAATTCAAGAGATTAGTCCAAGATTGCATCCCAGTTTTTTGct  
cgagctggcgaattcc  
>CD\_NM\_130441.2:1073  
CgCctGcgagtctGGtatGAACATTCACTGTCATGTACCTCTTCAAGAGAGAGGTACATGACAGTGAATGTCTTTTTTGct  
cgagctggcgaattcc  
>CD\_NM\_130441.2:749  
CgCctGcgagtctGGtatGCGGACTTCATTTCAAGTCTAGTTTTTCAAGAGAACTAGACTGAAATGAAGTCCATTTTTGct  
cgagctggcgaattcc  
>CD\_NM\_130441.2:1021  
CgCctGcgagtctGGtatGCGAGCGTTGTGCGATAATAAAATTTCAAGAGAATTTATTATCGCACAAACGCTCATTTTTTGct  
cgagctggcgaattcc  
>CD\_NM\_130441.2:1111  
CgCctGcgagtctGGtatGAATGAAGAAGATCTACATATAATTCAAGAGATTATATGTAGATCTTCTTCATCTTTTTTGct  
cgagctggcgaattcc  
>CD\_NM\_130441.2:506  
CgCctGcgagtctGGtatGAAGCCTCAAGACCGAGAGAAAGTTCAAGAGACTTCTCTCGGTCTTGAGGCTCTTTTTTGct  
cgagctggcgaattcc  
>CD\_NM\_130441.2:590  
CgCctGcgagtctGGtatGATCTGTTTCACTGTGAGTTCTGTTCAAGAGACAGAACTCACAGTGAACAGACTTTTTTGct  
cgagctggcgaattcc  
>CD\_NM\_130441.2:1082  
CgCctGcgagtctGGtatGCGTCATGTACCTCAGAAGTCAATTCAAGAGATTGACTTCTGAGGTACATGACATTTTTTGct  
cgagctggcgaattcc  
>CD\_NM\_130441.2:1099  
CgCctGcgagtctGGtatGATCAATTTGCAAGATGAAGAAGTTCAAGAGACTTCTTCATCTTGCAAATTGACTTTTTTGct  
cgagctggcgaattcc  
>CD\_NM\_130441.2:938  
CgCctGcgagtctGGtatGAGGCGACATTGGCAATGGGTTGTTCAAGAGACAACCCATTGCCAATGTCGCCGTTTTTTGct  
cgagctggcgaattcc  
>CD\_NM\_130441.2:662



CgCtGcgagtctGGtatGCTACGAGAGTATCAACAGTATCTTCAAGAGAGATACTGTTGATACTCTCGTAATTTTTGct  
cgagctggcgaattcc  
>CD\_NM\_130441.2:592  
CgCtGcgagtctGGtatGATGTTTCACTGTGAGTTCTGTGTTCAAGAGACACAGAACTCACAGTGAAACAGTTTTGct  
cgagctggcgaattcc  
>CD\_NM\_130441.2:699  
CgCtGcgagtctGGtatGACGTCATGGAAGGAAAGGACATTTCAAGAGAATGTCTTTTCTTCCATGACGCTTTTTGct  
cgagctggcgaattcc  
>CD\_NM\_130441.2:868  
CgCtGcgagtctGGtatGCCAGGATTTTCATCATTGAGAATTTCAAGAGAATTTCTGAATGATGAAATCCTGTTTTTGGct  
cgagctggcgaattcc  
>CD\_NM\_130441.2:1090  
CgCtGcgagtctGGtatGCCCTCAGAAAGTCAATTTGCAAGTTCAAGAGACTTGCAAATTGACTTCTGAGGTTTTTGGct  
cgagctggcgaattcc  
>CD\_NM\_130441.2:556  
CgCtGcgagtctGGtatGATCCATGGCAGTCGTATCCATCTTCAAGAGAGATGGATACGACTGCCATGGACTTTTTGct  
cgagctggcgaattcc  
>CD\_NM\_130441.2:952  
CgCtGcgagtctGGtatGCTGGGTTGACCAGACACCATACTTCAAGAGAGTATGGTGTCTGGTCAACCCATTTTTGct  
cgagctggcgaattcc  
>CD\_NM\_130441.2:528  
CgCtGcgagtctGGtatGAACTCTGGTGGTTCAGTTGAATTTCAAGAGATTTCAACTGGAACCACCAGAGTCTTTTTGct  
cgagctggcgaattcc  
>CD\_NM\_130441.2:1020  
CgCtGcgagtctGGtatGCTGAGCGTTGTGCGATAATAAATTTCAAGAGATTTATTATCGCACAACGCTCATTTTTGct  
cgagctggcgaattcc  
>CD\_NM\_130441.2:601  
CgCtGcgagtctGGtatGCGTGAGTTCTGTGGTGCCTCACTTCAAGAGAGTGAGGCACCACAGAACTCACATTTTTGct  
cgagctggcgaattcc  
>CD\_NM\_130441.2:582  
CgCtGcgagtctGGtatGCCCTCAGTGTCTGTTTCACTGTTTCAAGAGAACAGTGAAACAGACACTGAGGATTTTTGct  
cgagctggcgaattcc  
>CD\_NM\_130441.2:571  
CgCtGcgagtctGGtatGCTCCATCTTGCTCCTCAGTGTCTTCAAGAGAGACACTGAGGAGCAAGATGGATTTTTGct  
cgagctggcgaattcc  
>CD\_NM\_003873:382  
CgCtGcgagtctGGtatGATCCTGGTTATCCTCATTCTTATTCAAGAGATAAGAATGAGGATAACCAGGAGTTTTGct  
cgagctggcgaattcc  
>CD\_NM\_003873:440  
CgCtGcgagtctGGtatGCCCGGACCCATACCAGAGAATTTTCAAGAGAAATTTCTCTGGTATGGGTCCGGATTTTTGct  
cgagctggcgaattcc  
>CD\_NM\_003873:1563  
CgCtGcgagtctGGtatGCTGGGTATGGTGTCTGGACTTATTCAAGAGATAAGTCCAGACACCATAACCAATTTTTGct  
cgagctggcgaattcc  
>CD\_NM\_003873:1095  
CgCtGcgagtctGGtatGATGGGCATGGAATCAGGAGAAATTTCAAGAGATTTCTCCTGATTCCATGCCAGTTTTGct  
cgagctggcgaattcc  
>CD\_NM\_003873:1525  
CgCtGcgagtctGGtatGCCGGTTGCAAGATAACAGATTATTCAAGAGATAATCTGTTATCTTGAACCGTTTTTGGct  
cgagctggcgaattcc  
>CD\_NM\_001024628.1:805  
CgCtGcgagtctGGtatGATCAGAGATTATCCTGGAATTTTTCAAGAGAAAATTCAGGATAATCTCTGACTTTTTGct  
cgagctggcgaattcc  
>CD\_NM\_001024628.1:2171

CgCctGcgagtctGGtatGCCATACAATCAGGTATCAAATTTCAAGAGAATTTGATACCTGATTGTATGGTTTTTTGct  
cgagctggcgaattcc  
>CD\_NM\_001024628.1:1066  
CgCctGcgagtctGGtatGATCAGAAGATTTCAAATGTATGTTCAAGAGACATACATTTGAAATCTTCTGAGTTTTTTGct  
cgagctggcgaattcc  
>CD\_NM\_001024628.1:382  
CgCctGcgagtctGGtatGCCCTGGTTATCCTCATTCTTATTTCAAGAGAATAAGAATGAGGATAACCAGGATTTTTTTGct  
cgagctggcgaattcc  
>CD\_NM\_001024628.1:1958  
CgCctGcgagtctGGtatGAAGAGAGCCACTCATGGCGGACTTCAAGAGAGTCCGCCATGAGTGGCTCTCTCTTTTTTTGct  
cgagctggcgaattcc  
>CD\_NM\_001024628.1:1420  
CgCctGcgagtctGGtatGAACAGATGTTGTGGTTGCAGTATTCAAGAGATACTGCAACCACAACATCTGTGTTTTTTGct  
cgagctggcgaattcc  
>CD\_NM\_001024628.1:795  
CgCctGcgagtctGGtatGAGCCAAAGATGTCAGAGATTATTTCAAGAGAATAATCTCTGACATCTTTGGCGTTTTTTGct  
cgagctggcgaattcc  
>CD\_NM\_001024628.1:383  
CgCctGcgagtctGGtatGACTGGTTATCCTCATTCTTATCTTCAAGAGAGATAAGAATGAGGATAACCAGTTTTTTGct  
cgagctggcgaattcc  
>CD\_NM\_001024628.1:815  
CgCctGcgagtctGGtatGCTCCTGGAATTTGAAAGCTTTGTTCAAGAGACAAAGCTTTCAAATTCAGGATTTTTTTGct  
cgagctggcgaattcc  
>CD\_NM\_001024628.1:1926  
CgCctGcgagtctGGtatGATCTCTCCACGCGATTTCATCAGTTCAAGAGACTGATGAATCGCGTGGAGAGAGTTTTTTGct  
cgagctggcgaattcc  
>CD\_NM\_001024628.1:1785  
CgCctGcgagtctGGtatGCGGTGTTTCATGAGGAAGTTCAATTCAGAGATTGAACTTCTCATGAACACCTTTTTTTGct  
cgagctggcgaattcc  
>CD\_NM\_001024628.1:1095  
CgCctGcgagtctGGtatGCGGGCATGGAATCAGGAGAAATTTCAAGAGAATTTCTCCTGATTCCATGCCATTTTTTTGct  
cgagctggcgaattcc  
>CD\_NM\_001024628.1:1824  
CgCctGcgagtctGGtatGCCGGCTCGGACTGGAAGATGATTTCAAGAGAATCATCTTCCAGTCCGAGCCGTTTTTTGct  
cgagctggcgaattcc  
>CD\_NM\_001024628.1:1248  
CgCctGcgagtctGGtatGCGGGCCTTCTGCGCTTTGTCACTTCAAGAGAGTGACAAAGCGCAGAAGGCCATTTTTTTGct  
cgagctggcgaattcc  
>CD\_NM\_001024628.1:1504  
CgCctGcgagtctGGtatGCTCTATGAGATTTGAAGTATACTTCAAGAGAGTATACTTCAAATCTCATAGATTTTTTTGct  
cgagctggcgaattcc  
>CD\_NM\_001024628.1:371  
CgCctGcgagtctGGtatGCACCTTACATCTCCTGGTTATCTTCAAGAGAGATAACCAGGAGATGTAAGGTATTTTTTTGct  
cgagctggcgaattcc  
>CD\_NM\_001024628.1:1563  
CgCctGcgagtctGGtatGCGGGTATGGTGTCTGGACTTATTTCAAGAGAATAAGTCCAGACACCATAACCATTTTTTTGct  
cgagctggcgaattcc  
>CD\_NM\_001024628.1:1459  
CgCctGcgagtctGGtatGCACTCGATTTGTCCGAATCAAGTTCAAGAGACTTGATTCGGACAAATCGAGTTTTTTTTGct  
cgagctggcgaattcc  
>CD\_NM\_001024628.1:454  
CgCctGcgagtctGGtatGAAGAATTATGATCAACTTCAACTTCAAGAGAGTTGAAGTTGATCATAATTTCTTTTTTTGct  
cgagctggcgaattcc  
>CD\_NM\_001024628.1:1997

CgCctGcgagtctGGtatGATGCTGGGCTGTGAAGTGAAGTTCAAGAGACTTCCACTTACAGCCCAGCAGTTTTTGct  
cgagctggcgaattcc  
>CD\_NM\_001024628.1:1395  
CgCctGcgagtctGGtatGCTCTCTTTCAGGGAAACACCAATTCAGAGATTGGTGTTCCTGAAAGAGAATTTTTGct  
cgagctggcgaattcc  
>CD\_NM\_001024628.1:1687  
CgCctGcgagtctGGtatGCCCTCATTCTTACATCAATGAGTTCAAGAGACTCATTGATGTAGGAATGAGGTTTTTTGct  
cgagctggcgaattcc  
>CD\_NM\_001024628.1:715  
CgCctGcgagtctGGtatGCACACCTAGTGGAGTGATAAAGTTCAAGAGACTTTATCACTCCACTAGGTGTTTTTTGct  
cgagctggcgaattcc  
>CD\_NM\_001024628.1:389  
CgCctGcgagtctGGtatGCATCCTCATCTTATCACCCAATTCAGAGATTGGGTGATAAGAATGAGGATATTTTTGct  
cgagctggcgaattcc  
>CD\_NM\_001024628.1:1702  
CgCctGcgagtctGGtatGAAATGAGTGGCTCCAAATAGACTTCAAGAGAGTCTATTTGGAGCCACTCATTGTTTTGct  
cgagctggcgaattcc  
>CD\_NM\_001024628.1:629  
CgCctGcgagtctGGtatGATCTCTGACTACGAAACACATGTTCAAGAGACATGTGTTTCGTAGTCAGAGACTTTTTGct  
cgagctggcgaattcc  
>CD\_NM\_001024628.1:1489  
CgCctGcgagtctGGtatGCTGGGAAACTGGCATATCTATGTTCAAGAGACATAGATATGCCAGTTTCCAATTTTTGct  
cgagctggcgaattcc  
>CD\_NM\_001024628.1:1655  
CgCctGcgagtctGGtatGCCCAGTCGCTCTGGCTGGGCACTTCAAGAGAGTGCCAGCCAGAGCGACTGGTTTTTTGct  
cgagctggcgaattcc  
>CD\_NM\_002287:241  
CgCctGcgagtctGGtatGCGGGAGAGTAGATCCACATACATTCAGAGATGTATGTGGATCTACTCTCCCTTTTTGct  
cgagctggcgaattcc  
>CD\_NM\_002287:344  
CgCctGcgagtctGGtatGACGGGCCTTATCGCTGCATCTATTCAAGAGATAGATGCAGCGATAAGGCCCGTTTTGct  
cgagctggcgaattcc  
>CD\_NM\_002287:347  
CgCctGcgagtctGGtatGAGCCTTATCGCTGCATCTATTATTCAAGAGATAATAGATGCAGCGATAAGGCCTTTTGct  
cgagctggcgaattcc  
>CD\_NM\_002287:346  
CgCctGcgagtctGGtatGAGGCCTTATCGCTGCATCTATTTTCAAGAGAAATAGATGCAGCGATAAGGCCTTTTGct  
cgagctggcgaattcc  
>CD\_NM\_002287:343  
CgCctGcgagtctGGtatGACCGGGCCTTATCGCTGCATCTTTTCAAGAGAAGATGCAGCGATAAGGCCCGTTTTGct  
cgagctggcgaattcc  
>CD\_NM\_002287:345  
CgCctGcgagtctGGtatGAGGGCCTTATCGCTGCATCTATTTCAAGAGAATAGATGCAGCGATAAGGCCCGTTTTGct  
cgagctggcgaattcc  
>CD\_NM\_002287.2:252  
CgCctGcgagtctGGtatGCCACATACAATGATACTGAAGTTCAAGAGACTTCAAGATCATTGTATGTGGATTTTTGct  
cgagctggcgaattcc  
>CD\_NM\_002287.2:321  
CgCctGcgagtctGGtatGAACTCAGTAAGTGAAGGAAATGTTCAAGAGACATTTCTTCACTTACTGAGTCTTTTTGct  
cgagctggcgaattcc  
>CD\_NM\_002287.2:617  
CgCctGcgagtctGGtatGCCGCCAGAAATCAGATAAAGCAGTTCAAGAGACTGCTTTATCTGATTCTGGCGATTTTTGct  
cgagctggcgaattcc  
>CD\_NM\_002287.2:536

CgCctGcgagtctGGtatGCGCTGAGCATCTGTATATTCTCTTCAAGAGAGAGAATATACAGATGCTCAGCTTTTTTGct  
cgagctggcgaattcc  
>CD\_NM\_002287.2:241  
CgCctGcgagtctGGtatGAGGAGAGTAGATCCACATACAATTCAAGAGATTGTATGTGGATCTACTCTCCCTTTTTTGct  
cgagctggcgaattcc  
>CD\_NM\_002287.2:507  
CgCctGcgagtctGGtatGAAGCATGCACCTGCTTCCCAAGTTCAAGAGACTTGGGAAGCAGGTGCATGCTCTTTTTTGct  
cgagctggcgaattcc  
>CD\_NM\_002287.2:716  
CgCctGcgagtctGGtatGCGCAGACAAGGCCACAGTCAATTTCAAGAGAATTGACTGTGGCCTTGTCTGCTTTTTTGct  
cgagctggcgaattcc  
>CD\_NM\_002287.2:315  
CgCctGcgagtctGGtatGAGCATTGACTCAGTAAGTGAAGTTCAAGAGACTTCACTTACTGAGTCAATGCGTTTTTGct  
cgagctggcgaattcc  
>CD\_NM\_002287.2:608  
CgCctGcgagtctGGtatGATGCCTCCATCGCCAGAATCAGTTCAAGAGACTGATTCTGGCGATGGAGGCAGTTTTTGct  
cgagctggcgaattcc  
>CD\_NM\_002287.2:264  
CgCctGcgagtctGGtatGAATACTGAAGATGTGTCTCAAGTTCAAGAGACTTGAGACACATCTTCAGTATCTTTTTTGct  
cgagctggcgaattcc  
>CD\_NM\_002287.2:728  
CgCctGcgagtctGGtatGAACAGTCAATGGACTTCTGAGTTCAAGAGACTCAGGAAGTCCATTGACTGTGTTTTTGct  
cgagctggcgaattcc  
>CD\_NM\_002287.2:521  
CgCctGcgagtctGGtatGCTCCCAAGGCCGAAAGCTGAGTTCAAGAGACTCAGCTTTCAGGCCTTGGGAATTTTTTGct  
cgagctggcgaattcc  
>CD\_NM\_002287.2:403  
CgCctGcgagtctGGtatGCGGAGCTGCTGGTGAAGAAACTTCAAGAGAGTTTCTTTACCAGCAGCTCCATTTTTTGct  
cgagctggcgaattcc  
>CD\_NM\_002287.2:495  
CgCctGcgagtctGGtatGCACAGTCACAATGAGCATGCACTTCAAGAGAGTGCATGCTCATTGTGACTGTTTTTTTGct  
cgagctggcgaattcc  
>CD\_NM\_002287.2:101  
CgCctGcgagtctGGtatGAGCCCAGACCATCCACACGCAGTTCAAGAGACTGCGTGTGGATGGTCTGGGCCTTTTTTGct  
cgagctggcgaattcc  
>CD\_NM\_002287.2:478  
CgCctGcgagtctGGtatGAGCAGAGGCCGTCGGACAACAGTTCAAGAGACTGTTGTCCGACGGCCTCTGCGTTTTTGct  
cgagctggcgaattcc  
>CD\_NM\_002287.2:398  
CgCctGcgagtctGGtatGATACCTGGAGCTGCTGGTGAATTTCAAGAGATTTACCAGCAGCTCCAGGTAGTTTTTGct  
cgagctggcgaattcc  
>CD\_NM\_002287.2:319  
CgCctGcgagtctGGtatGCTGACTCAGTAAGTGAAGGAAATTTCAAGAGATTTCTTCACTTACTGAGTCAATTTTTTGct  
cgagctggcgaattcc  
>CD\_NM\_002287.2:401  
CgCctGcgagtctGGtatGACTGGAGCTGCTGGTGAAGAATTTCAAGAGATTTCTTACCAGCAGCTCCAGTTTTTGct  
cgagctggcgaattcc  
>CD\_NM\_002287.2:347  
CgCctGcgagtctGGtatGACCTTATCGCTGCATCTATTATTTCAAGAGAATAATAGATGCAGCGATAAGGCTTTTTTGct  
cgagctggcgaattcc  
>CD\_NM\_002287.2:344  
CgCctGcgagtctGGtatGAGGGCCTTATCGCTGCATCTATTTCAAGAGAATAGATGCAGCGATAAGGCCGTTTTTGct  
cgagctggcgaattcc  
>CD\_NM\_002287.2:392

CgCtGcgagtctGGtatGAAGTACTACCTGGAGCTGCTGTTCAAGAGACAGCAGCTCCAGGTAGTCACTCTTTTTGct  
cgagctggcgaattcc  
>CD\_NM\_002287.2:680  
CgCtGcgagtctGGtatGAAGCCTGACCTGGCTGTTGATTTCAAGAGAATCAACAGCCAGGTCAGGCCTCTTTTTGct  
cgagctggcgaattcc  
>CD\_NM\_002287.2:289  
CgCtGcgagtctGGtatGATCCATCTGAGTCAGAGGCCAGTTCAAGAGACTGGCCTCTGACTCAGATGGACTTTTTGct  
cgagctggcgaattcc  
>CD\_NM\_002287.2:254  
CgCtGcgagtctGGtatGAACATACAATGATACTGAAGATTTCAAGAGAATCTTCAGTATCATTGTATGTGTTTTGct  
cgagctggcgaattcc  
>CD\_NM\_002287.2:304  
CgCtGcgagtctGGtatGCGGCCAGATTCGCATTGACTCTTCAAGAGAGAGTCAATGCGGAATCTGGCCTTTTTGct  
cgagctggcgaattcc  
>CD\_NM\_002287.2:692  
CgCtGcgagtctGGtatGAGCTGTTGATGTTCTAGAGAGGTTCAAGAGACCTCTCTAGAACATCAACAGCCTTTTTGct  
cgagctggcgaattcc  
>CD\_NM\_002288:317  
CgCtGcgagtctGGtatGCGCCAAGTACAAAGATAGTTATTTCAAGAGAATAACTATCTTTGTACTTGGCTTTTTGct  
cgagctggcgaattcc  
>CD\_NM\_002288:408  
CgCtGcgagtctGGtatGACCGGGCTTTATCGCTGCCTCTTTCAAGAGAAGAGGCAGCGATAAAGCCCGCTTTTTGct  
cgagctggcgaattcc  
>CD\_NM\_002288:409  
CgCtGcgagtctGGtatGACGGGCTTTATCGCTGCCTCTATTCAAGAGATAGAGGCAGCGATAAAGCCCGTTTTGct  
cgagctggcgaattcc  
>CD\_NM\_002288:410  
CgCtGcgagtctGGtatGAGGGCTTTATCGCTGCCTCTATTTCAAGAGAATAGAGGCAGCGATAAAGCCCGTTTTGct  
cgagctggcgaattcc  
>CD\_NM\_002288:411  
CgCtGcgagtctGGtatGAGGCTTTATCGCTGCCTCTATTTTCAAGAGAAATAGAGGCAGCGATAAAGCCCTTTTTGct  
cgagctggcgaattcc  
>CD\_NM\_002288:557  
CgCtGcgagtctGGtatGCGCCTCCGGATTTGATGCACCATTCAAGAGATGGTGCATCAAATCCGGAGGCTTTTTGct  
cgagctggcgaattcc  
>CD\_NM\_002288.3:386  
CgCtGcgagtctGGtatGAACTCAGTAAGTGAAGGAAATGTTCAAGAGACATTTCTTCACTTACTGAGTCTTTTTGct  
cgagctggcgaattcc  
>CD\_NM\_002288.3:331  
CgCtGcgagtctGGtatGCAGTTATAATGTGTTTCGACTTTTTCAAGAGAAAGTCGAAACACATTATAACTATTTTTGct  
cgagctggcgaattcc  
>CD\_NM\_002288.3:463  
CgCtGcgagtctGGtatGATTCCTGGAGCTGCTGGTGAATTTCAAGAGATTTACCAGCAGCTCCAGGAAGTTTTGct  
cgagctggcgaattcc  
>CD\_NM\_002288.3:557A  
CgCtGcgagtctGGtatGACCTCCGGATTTGATGCACCATTCAAGAGAATGGTGCATCAAATCCGGAGGCTTTTTGct  
cgagctggcgaattcc  
>CD\_NM\_002288.3:380  
CgCtGcgagtctGGtatGAACATTGACTCAGTAAGTGAAGTTCAAGAGACTTCACTTACTGAGTCAATGTGTTTTGct  
cgagctggcgaattcc  
>CD\_NM\_002288.3:557B  
CgCtGcgagtctGGtatGCCCGGATTTGATGCACCATGAATTTCAAGAGATTCATGGTGCATCAAATCCGGATTTTTGct  
cgagctggcgaattcc  
>CD\_NM\_002288.3:468

CgCtGcgagtctGGtatGCGGAGCTGCTGGTGAAGAAAGTTCAAGAGACTTTCTTTACCAGCAGCTCCATTTTTGct  
cgagctggcgaattcc  
>CD\_NM\_002288.3:166  
CgCtGcgagtctGGtatGAGCCCAGACCATCCACACGCAGTTCAAGAGACTGCGTGTGGATGGTCTGGGCCTTTTTGct  
cgagctggcgaattcc  
>CD\_NM\_002288.3:384  
CgCtGcgagtctGGtatGCTGACTCAGTAAGTGAAGGAAATTCAGAGATTTCTTCACTTACTGAGTCAATTTTTGct  
cgagctggcgaattcc  
>CD\_NM\_002288.3:409  
CgCtGcgagtctGGtatGAGGGCTTTATCGCTGCCTCTATTTCAAGAGAATAGAGGCAGCGATAAAGCCCGTTTTGct  
cgagctggcgaattcc  
>CD\_NM\_002288.3:466  
CgCtGcgagtctGGtatGACTGGAGCTGCTGGTGAAGAATTCAGAGATTTCTTACCAGCAGCTCCAGTTTTGct  
cgagctggcgaattcc  
>CD\_NM\_002288.3:415  
CgCtGcgagtctGGtatGCTATCGCTGCCTCTATTATAAGTTCAAGAGACTTATAATAGAGGCAGCGATAATTTTTGct  
cgagctggcgaattcc  
>CD\_NM\_002288.3:354  
CgCtGcgagtctGGtatGATCCATCTGAGTCAGAGGCCAGTTCAAGAGACTGGCCTCTGACTCAGATGGACTTTTTGct  
cgagctggcgaattcc  
>CD\_NM\_002288.3:317  
CgCtGcgagtctGGtatGACCAAGTACAAAGATAGTTATATTCAAGAGATATAACTATCTTTGTACTTGGCTTTTTGct  
cgagctggcgaattcc  
>CD\_NM\_002288.3:285  
CgCtGcgagtctGGtatGCTCAAACATTCGCTGGAGAGTTCAAGAGACTCTCCAGGCGGAATGTTTGAATTTTTGct  
cgagctggcgaattcc  
>CD\_NM\_002288.3:289  
CgCtGcgagtctGGtatGCACATTCGCTGGAGAGGGAGTTCAAGAGACTCCCTCTCCAGGCGGAATGTTTTTTGct  
cgagctggcgaattcc  
>CD\_NM\_002288.3:536  
CgCtGcgagtctGGtatGAGGACTGTGCCAGGCACTGAAGTTCAAGAGACTTCAGTGCCTGGCACAGTCCCTTTTTGct  
cgagctggcgaattcc  
>CD\_NM\_002288.3:156  
CgCtGcgagtctGGtatGCGCTCTGCCTGGCCAGACCATTTCAAGAGAATGGTCTGGGCCAGGAGCAGCATTTTTTGct  
cgagctggcgaattcc  
>CD\_NM\_002288.3:512  
CgCtGcgagtctGGtatGAACACAGAGCCCGGCTCCTCAGTTCAAGAGACTGAGGAGCCGGGCTCTGTGTCTTTTTGct  
cgagctggcgaattcc  
>CD\_NM\_002288.3:329  
CgCtGcgagtctGGtatGAATAGTTATAATGTGTTTCGACTTCAAGAGAGTCGAAACACATTATAACTATCTTTTTGct  
cgagctggcgaattcc  
>CD\_NM\_002288.3:440  
CgCtGcgagtctGGtatGACTGGATGGTCTGAGCACAGTGTTCAGAGACACTGTGCTCAGACCATCCAGTTTTGct  
cgagctggcgaattcc  
>CD\_NM\_002288.3:206  
CgCtGcgagtctGGtatGACCTCCATCTCGCTGAGCCAGTTCAAGAGACTGGCTCAGCCGAGATGGAGGGTTTTGct  
cgagctggcgaattcc  
>CD\_NM\_002288.3:442  
CgCtGcgagtctGGtatGCGGATGGTCTGAGCACAGTACTTCAAGAGAGTCACTGTGCTCAGACCATCCATTTTTGct  
cgagctggcgaattcc  
>CD\_NM\_002288.3:202  
CgCtGcgagtctGGtatGAAGACCTCCATCTCGCTGAGTTCAAGAGACTCAGCCGAGATGGAGGGTCTTTTTGct  
cgagctggcgaattcc  
>CD\_NM\_002288.3:548

CgCtGcgagtctGGtatGAGCACTGAAGCCTCCGGATTTGTTCAAGAGACAAATCCGGAGGCTTCAGTGCCTTTTTGct  
cgagctggcgaattcc  
>CD\_NM\_002288.3:457  
CgCtGcgagtctGGtatGAAGTGACTTCTGGAGCTGCTGTTCAAGAGACAGCAGCTCCAGGAAGTCACTGTTTTGct  
cgagctggcgaattcc  
>CD\_NM\_002288.3:412  
CgCtGcgagtctGGtatGACTTTATCGCTGCCTCTATTATTTCAAGAGAATAATAGAGGCAGCGATAAAGCTTTTTGct  
cgagctggcgaattcc  
>CD\_NM\_031281:536  
CgCtGcgagtctGGtatGAGCGGAAGTAACACTGAATAATTTCAAGAGAATTATTCAGTGTACTTCCGCCTTTTTGct  
cgagctggcgaattcc  
>CD\_NM\_031281:643  
CgCtGcgagtctGGtatGATGCATATCGCTGTACTGGATATTCAAGAGATATCCAGTACAGCGATATGCACTTTTGct  
cgagctggcgaattcc  
>CD\_NM\_031281:650  
CgCtGcgagtctGGtatGCCGCTGTACTGGATATAAGGAATTCAAGAGATTCCTTATATCCAGTACAGCGATTTTTGct  
cgagctggcgaattcc  
>CD\_NM\_031281:2552  
CgCtGcgagtctGGtatGACCCTCTGGAGGAGCGTCCTTATTCAAGAGATAAGGACGCTCCTCCAGAGGGTTTTGct  
cgagctggcgaattcc  
>CD\_NM\_031281:2877  
CgCtGcgagtctGGtatGAAGCTGCAACCAGTGTACACTATTCAAGAGATAGTGTACACTGGTTGCAGCTTTTTGct  
cgagctggcgaattcc  
>CD\_NM\_031281:2884  
CgCtGcgagtctGGtatGCACCAGTGTACACTAATGCAAATTTCAAGAGATTTGCATTAGTGTACACTGGTTTTTTGct  
cgagctggcgaattcc  
>CD\_NM\_031281:1807  
CgCtGcgagtctGGtatGCGCGCAGTGAAGTGGTGAGCCTTTCAAGAGAAGGCTCACCACCTTCACTGCGCTTTTTGct  
cgagctggcgaattcc  
>CD\_NM\_031281:2081  
CgCtGcgagtctGGtatGAGCCCAGCACAGTGACACAATATTCAAGAGATATTGTGTCACTGTGCTGGGCCTTTTTGct  
cgagctggcgaattcc  
>CD\_NM\_031281:367  
CgCtGcgagtctGGtatGACCAGACAATATCCTTGAGTTTTCAAGAGAACCTCAAGGATATTGTCTGGGTTTTGct  
cgagctggcgaattcc  
>CD\_NM\_031281.1:952  
CgCtGcgagtctGGtatGACCTCACAGCGTCATATCTGACTTCAAGAGAGTCAGATATGACGCTGTGAGGCTTTTTGct  
cgagctggcgaattcc  
>CD\_NM\_031281.1:2644  
CgCtGcgagtctGGtatGAAGTGAGACAGTGACACTTTATTTCAAGAGAATAAAGTGTCACTGTCTCACTGTTTTGct  
cgagctggcgaattcc  
>CD\_NM\_031281.1:1736  
CgCtGcgagtctGGtatGCTCAGCTTCTCTGACTGAAGTTCAAGAGACTTCAGTCAGAGAGAAGCTGAATTTTTGct  
cgagctggcgaattcc  
>CD\_NM\_031281.1:367  
CgCtGcgagtctGGtatGACCAGACAATATCCTTGAGTTTTCAAGAGAAACCTCAAGGATATTGTCTGGGTTTTGct  
cgagctggcgaattcc  
>CD\_NM\_031281.1:1615  
CgCtGcgagtctGGtatGCGGAGCCACTGTGACACTTCAAGAGAGTGAAGTGTACAGTGGCTCCTTTTTGct  
cgagctggcgaattcc  
>CD\_NM\_031281.1:577  
CgCtGcgagtctGGtatGCGTCTGGCATTCTTAATAAATTTCAAGAGATTTATTAAGGAATGCCAGGACATTTTTGct  
cgagctggcgaattcc  
>CD\_NM\_031281.1:2368

CgCtGcgagtctGGtatGAAGTGAGATGGTGACACTGAAATTC AAGAGATTCAGTGT CACCATCTCACTGTTTTTGct  
cgagctggcgaattcc  
>CD\_NM\_031281.1:1009  
CgCtGcgagtctGGtatGCTCTCATCCTGTCTCACTCTCTTCAAGAGAGAGAGTGAGGACAGGATGAGATTTTTTGct  
cgagctggcgaattcc  
>CD\_NM\_031281.1:271  
CgCtGcgagtctGGtatGAAGAGTGACCTCAC TTGCAAGTTCAAGAGACTTGCAAGTGAGGGTCACTCTCTTTTTGct  
cgagctggcgaattcc  
>CD\_NM\_031281.1:1756  
CgCtGcgagtctGGtatGCGGACATTCAGGGAATTACTACTTCAAGAGAGTAGTAATCCCTGAATGTCCTTTTTTGct  
cgagctggcgaattcc  
>CD\_NM\_031281.1:1336  
CgCtGcgagtctGGtatGAGGAGCCAAGGTGACACTTCACTTCAAGAGAGTGAAGTGT CACCTTGGCTCCCTTTTTGct  
cgagctggcgaattcc  
>CD\_NM\_031281.1:2646  
CgCtGcgagtctGGtatGATGAGACAGTGACACTTTATATTTCAAGAGAATATAAAGTGTCACTGTCTCACTTTTTGct  
cgagctggcgaattcc  
>CD\_NM\_031281.1:568  
CgCtGcgagtctGGtatGAAATGATAATGTCCTGGCATTCTTCAAGAGAGAATGCCAGGACATTATCATTCTTTTTGct  
cgagctggcgaattcc  
>CD\_NM\_031281.1:460  
CgCtGcgagtctGGtatGCTCAGCTTCGCTGATCCTGCAATTC AAGAGATTGCAGGATCAGCGAAGCTGAATTTTTGct  
cgagctggcgaattcc  
>CD\_NM\_031281.1:1452  
CgCtGcgagtctGGtatGCGGCCATCAGCTTCTCTGACTTCAAGAGAGTCAGAGAGAAGCTGATGGCCATTTTTGct  
cgagctggcgaattcc  
>CD\_NM\_031281.1:2021  
CgCtGcgagtctGGtatGATCTCTCTGACTGCAGAACATTTTCAAGAGAAATGTTCTGCAGTCAGAGAGAGTTTTGct  
cgagctggcgaattcc  
>CD\_NM\_031281.1:1742  
CgCtGcgagtctGGtatGCTCTCTCTGACTGAAGGACATTTTCAAGAGAAATGTCCTT CAGTCAGAGAGAATTTTTGct  
cgagctggcgaattcc  
>CD\_NM\_031281.1:677  
CgCtGcgagtctGGtatGCGCCCTGTTTCTTCCAATACAGTTCAAGAGACTGTATTGGAAGAAACAGGGCATTTTTGct  
cgagctggcgaattcc  
>CD\_NM\_031281.1:197  
CgCtGcgagtctGGtatGCGTGGACAGTTT GCAAGGACACTTCAAGAGAGTGTCTTGCAA ACTGTCCACTTTTTTGct  
cgagctggcgaattcc  
>CD\_NM\_031281.1:482  
CgCtGcgagtctGGtatGACTCCACTTCTGTGTTTGAAGTTCAAGAGACTTCAAACACAGAAAGTGGAGCTTTTTGct  
cgagctggcgaattcc  
>CD\_NM\_031281.1:772  
CgCtGcgagtctGGtatGACCAGTGACCTGACCTGTGAGTTCAAGAGACTCACAGGT CAGGGTCACTGGGTTTTTGct  
cgagctggcgaattcc  
>CD\_NM\_031281.1:1463  
CgCtGcgagtctGGtatGCTCTCTCTGACTGCAGAGCATTTTCAAGAGAAATGCTCTGCAGTCAGAGAGAATTTTTGct  
cgagctggcgaattcc  
>CD\_NM\_031281.1:1288  
CgCtGcgagtctGGtatGATCTCATCCTGTCTCAACCTCTTCAAGAGAGAGGTTGAGGACAGGATGAGACTTTTTGct  
cgagctggcgaattcc  
>CD\_NM\_031281.1:1457  
CgCtGcgagtctGGtatGCTCAGCTTCTCTGACTGCAGTTCAAGAGACTGCAGTCAGAGAGAAGCTGATTTTTTGct  
cgagctggcgaattcc  
>CD\_NM\_002253:434



CgCtGcgagtctGGtatGCGGCTAATACAACCTTCAAATTTCAAGAGAATTTGAAGAGTTGTATTAGCCTTTTTTgct  
cgagctggcgaattcc  
>CD\_NM\_002253:478  
CgCtGcgagtctGGtatGCTGGACTGGCTTTGGCCCAATATTTCAAGAGATATTGGGCCAAAGCCAGTCCAATTTTTGct  
cgagctggcgaattcc  
>CD\_NM\_002253:1714  
CgCtGcgagtctGGtatGCGCCAAGCTGTCTCAGTGACAATTTCAAGAGATTGTCACTGAGACAGCTTGGCTTTTTTgct  
cgagctggcgaattcc  
>CD\_NM\_002253:3444  
CgCtGcgagtctGGtatGCGGCTTGGCCCGGGATATTTATTTCAAGAGAATAAATATCCCGGGCCAAGCCATTTTTGct  
cgagctggcgaattcc  
>CD\_NM\_002253:3781  
CgCtGcgagtctGGtatGCTGGGAAATCTCTTGCAAGCTATTCAAGAGATAGCTTGAAGAGATTTCCAATTTTTGct  
cgagctggcgaattcc  
>CD\_NM\_002253:4029  
CgCtGcgagtctGGtatGACCGTTAGAAGAACCAGAAGTATTCAAGAGATACTTCTGGTTCTTCTAACGGGTTTTTgct  
cgagctggcgaattcc  
>CD\_NM\_002253:1768  
CgCtGcgagtctGGtatGAAGGACTTCCAGGGAGGAAATATTTCAAGAGATATTTCTCCCTGGAAGTCTTTTTTgct  
cgagctggcgaattcc  
>CD\_NM\_002253.1:3305  
CgCtGcgagtctGGtatGATTGGAGCATCTCATCTGTTACTTCAAGAGAGTAACAGATGAGATGCTCCAAGTTTTTgct  
cgagctggcgaattcc  
>CD\_NM\_002253.1:2140  
CgCtGcgagtctGGtatGCTGCCACCATGTTCTCTAATAGTTCAAGAGACTATTAGAGAACATGGTGGCATTTTTTGct  
cgagctggcgaattcc  
>CD\_NM\_002253.1:984  
CgCtGcgagtctGGtatGATGAGTCCGTCTCATGGAATTGTTCAAGAGACAATTCATGAGACGGACTCAGTTTTTgct  
cgagctggcgaattcc  
>CD\_NM\_002253.1:3243  
CgCtGcgagtctGGtatGCAGTCCCTCAGTGATGTAGAAGTTCAAGAGACTTCTACATCACTGAGGGACTTTTTTgct  
cgagctggcgaattcc  
>CD\_NM\_002253.1:3032  
CgCtGcgagtctGGtatGACCACTCATGGTGATTGTGGAATTTCAAGAGATTCACAATCACCATGAGTGGCTTTTTTgct  
cgagctggcgaattcc  
>CD\_NM\_002253.1:539  
CgCtGcgagtctGGtatGAAGCGATGGCCTCTTCTGTAAGTTCAAGAGACTTACAGAAGAGGCCATCGCTGTTTTTgct  
cgagctggcgaattcc  
>CD\_NM\_002253.1:4319  
CgCtGcgagtctGGtatGCGCCAGATTCTCCAGCCTGACTTCAAGAGAGTCAGGCTGGAGAATCTGGGCTTTTTTgct  
cgagctggcgaattcc  
>CD\_NM\_002253.1:1535  
CgCtGcgagtctGGtatGCGTGGTCTCTCTGGTTGTGTATTTCAAGAGAATACACAACCAGAGAGACCACATTTTTGct  
cgagctggcgaattcc  
>CD\_NM\_002253.1:1734  
CgCtGcgagtctGGtatGCACCCATACCTTGTGAAGAATTTCAAGAGAATTTCTTACAAGGGTATGGGTTTTTTGct  
cgagctggcgaattcc  
>CD\_NM\_002253.1:1027  
CgCtGcgagtctGGtatGCTGTCTTAAATTGTACAGCAAGTTCAAGAGACTTGCTGTACAATTTAAGACAATTTTTGct  
cgagctggcgaattcc  
>CD\_NM\_002253.1:2464  
CgCtGcgagtctGGtatGCCCTCACTATCCGCAGAGTGAGTTCAAGAGACTCACTCTGCGGATAGTGAGGTTTTTTGct  
cgagctggcgaattcc  
>CD\_NM\_002253.1:4353

CgCctGcgagtctGGtatGATGAGCTCTCCTCCTGTTTAAATTCAAGAGATTTAAACAGGAGGAGAGCTCAGTTTTTGct  
cgagctggcgaattcc  
>CD\_NM\_002253.1:1002  
CgCctGcgagtctGGtatGCTTGAACCTATCTGTTGGAGAAATTCAAGAGATTTCTCCAACAGATAGTTCAATTTTTTGct  
cgagctggcgaattcc  
>CD\_NM\_002253.1:754  
CgCctGcgagtctGGtatGCCGGGTCCATTTCAAATCTCAATTTCAAGAGATTGAGATTTGAAATGGACCCGATTTTTTGct  
cgagctggcgaattcc  
>CD\_NM\_002253.1:2033  
CgCctGcgagtctGGtatGATTTGAGAACCCTCACATGGTACTTTCAAGAGAGTACCATGTGAGGTTCTCAAACTTTTTGct  
cgagctggcgaattcc  
>CD\_NM\_002253.1:1142  
CgCctGcgagtctGGtatGATCTGGGAGTGAGATGAAGAAATTCAAGAGATTTCTTCATCTCACTCCCAGACTTTTTTGct  
cgagctggcgaattcc  
>CD\_NM\_002253.1:2119  
CgCctGcgagtctGGtatGCGGATACTCTTTGGAAATTGAATTCAAGAGATTTCAATTTCAAAGAGTATCCATTTTTTGct  
cgagctggcgaattcc  
>CD\_NM\_002253.1:644  
CgCctGcgagtctGGtatGCTATGTCTATGTTCAAGATTACTTTCAAGAGAGTAATCTTGAACATAGACATAATTTTTTGct  
cgagctggcgaattcc  
>CD\_NM\_002253.1:2063  
CgCctGcgagtctGGtatGACCACAGCCTCTGCCAATCCATTTCAAGAGAATGGATTGGCAGAGGCTGTGGTTTTTGct  
cgagctggcgaattcc  
>CD\_NM\_002253.1:3161  
CgCctGcgagtctGGtatGCGCAATCCCTGTGGATCTGAAATTTCAAGAGATTTTCAGATCCACAGGGATTGCTTTTTTGct  
cgagctggcgaattcc  
>CD\_NM\_002253.1:638  
CgCctGcgagtctGGtatGAGTCATTTATGTCCTATGTTCAATTTCAAGAGATTGAACATAGACATAAATGACCTTTTTTGct  
cgagctggcgaattcc  
>CD\_NM\_002253.1:2255  
CgCctGcgagtctGGtatGCAGACATTGCGTGGTCAGGCAGTTCAAGAGACTGCCTGACCACGCAATGCTTTTTTTTGct  
cgagctggcgaattcc  
>CD\_NM\_002253.1:2115  
CgCctGcgagtctGGtatGCACTTGGATACTCTTTGGAAATTTCAAGAGAATTTCAAAGAGTATCCAAGTTTTTTTGct  
cgagctggcgaattcc  
>CD\_NM\_002253.1:982  
CgCctGcgagtctGGtatGCTCTGAGTCCGTCTCATGGAATTTCAAGAGAATTTCCATGAGACGGACTCAGAATTTTTTGct  
cgagctggcgaattcc  
>CD\_NM\_002253.1:2723  
CgCctGcgagtctGGtatGCCAGATGAACTCCCATTTGGATTTCAAGAGAATCCAATGGGAGTTCATCTGGATTTTTTGct  
cgagctggcgaattcc  
>CD\_NM\_002253.1:3761  
CgCctGcgagtctGGtatGCTCAGAGTTGGTGGAAACATTTGTTCAAGAGACAAATGTTCCACCAACTCTGAATTTTTTGct  
cgagctggcgaattcc  
>CD\_NM\_013447:2477  
CgCctGcgagtctGGtatGACCGCTGCTGGCTCCAACCAGATTCAAGAGATCTGGTTGGAGCCAGCAGCGGGTTTTTGct  
cgagctggcgaattcc  
>CD\_NM\_013447:462  
CgCctGcgagtctGGtatGCGGCCGCTCTTTCTCGTCTTTTTTCAAGAGAAAAGACGAGAAAGACGCGGCCTTTTTTTTGct  
cgagctggcgaattcc  
>CD\_NM\_001784:1219  
CgCctGcgagtctGGtatGCAGGACACTGTCTGTGAAGATATTCAAGAGATATCTTCACAGACAGTGTCCTTTTTTTTGct  
cgagctggcgaattcc  
>CD\_NM\_001784:1285

CgCctGcgagtctGGtatGCCGCTTCCCGATTCTTCGACATTCAAGAGATGTCGAAGAATCGGGAAAGCGTTTTTTGct  
cgagctggcgaattcc  
>CD\_NM\_013447.2:1219  
CgCctGcgagtctGGtatGCCGACACTGTCTGTGAAGATATTTCAAGAGAATATCTTCACAGACAGTGCCTTTTTTTGct  
cgagctggcgaattcc  
>CD\_NM\_013447.2:2057  
CgCctGcgagtctGGtatGAGTGCTGACTGTCATCACCTACTTCAAGAGAGTAGGTGATGACAGTCAGCACGTTTTTTGct  
cgagctggcgaattcc  
>CD\_NM\_013447.2:2535  
CgCctGcgagtctGGtatGACCATCTTCTCTGTGAATTTAGTTCAAGAGACTAAATTCACAGAGAAGATGGCTTTTTTTGct  
cgagctggcgaattcc  
>CD\_NM\_013447.2:1129  
CgCctGcgagtctGGtatGACTCCACCGTCTGCTTCAACACTTCAAGAGAGTGTGAAGCAGACGGTGGAGCTTTTTTTGct  
cgagctggcgaattcc  
>CD\_NM\_013447.2:1883  
CgCctGcgagtctGGtatGAAGACAGAAGGTGCTCTGTGTCTTCAAGAGAGACACAGAGCACCTTCTGTCTTTTTTTGct  
cgagctggcgaattcc  
>CD\_NM\_013447.2:676  
CgCctGcgagtctGGtatGCGTCGAAAGTGCATGCGGAAATTCAGAGATTTCCGCATGACACTTTCGACATTTTTTTGct  
cgagctggcgaattcc  
>CD\_NM\_013447.2:902  
CgCctGcgagtctGGtatGCCGCTTCAAGCTCAAACCTGAGTTCAAGAGACTCAGGTTTGAGCTTGAAGCCATTTTTTTGct  
cgagctggcgaattcc  
>CD\_NM\_013447.2:1802  
CgCctGcgagtctGGtatGATCTGCCTTTCTGAGCAACAACCTTCAAGAGAGTTGTTGCTCAGAAAGGCAGAGTTTTTTGct  
cgagctggcgaattcc  
>CD\_NM\_013447.2:1518  
CgCctGcgagtctGGtatGCTCAGTTATCCTGCAGGCACAGTTCAAGAGACTGTGCCTGCAGGATAACTGAATTTTTTTGct  
cgagctggcgaattcc  
>CD\_NM\_013447.2:2717  
CgCctGcgagtctGGtatGAGCTGCCCGGGTCATGGCCTACTTCAAGAGAGTAGGCCATGACCCGGGCAGCCTTTTTTTGct  
cgagctggcgaattcc  
>CD\_NM\_013447.2:1574  
CgCctGcgagtctGGtatGAAGTGTACCTTGAGACAGAATTTCAAGAGAATCTGTCTCAAGGTGACACTTTTTTTGct  
cgagctggcgaattcc  
>CD\_NM\_013447.2:1193  
CgCctGcgagtctGGtatGAAGACACGGAATCCCGAATAACTTCAAGAGAGTTATTCGGGATTCCGTGTCTGTTTTTTGct  
cgagctggcgaattcc  
>CD\_NM\_013447.2:1544  
CgCctGcgagtctGGtatGATCCCTGGAGGTGCAGAAGCAATTCAGAGATTGCTTCTGCACCTCCAGGGACTTTTTTTGct  
cgagctggcgaattcc  
>CD\_NM\_013447.2:2369  
CgCctGcgagtctGGtatGAATCAACAGATTCATGAAGAAGTTCAAGAGACTTCTTCATGAATCTGTTGATGTTTTTTGct  
cgagctggcgaattcc  
>CD\_NM\_013447.2:801  
CgCctGcgagtctGGtatGCCGTGTCAAGATGTGGACGAATTTCAAGAGAATTCGTCCACATCTTGACACGTTTTTTGct  
cgagctggcgaattcc  
>CD\_NM\_013447.2:697  
CgCctGcgagtctGGtatGCATTCTCGGACTGCTGGAACACTTCAAGAGAGTGTCCAGCAGTCCGAGAATTTTTTTGct  
cgagctggcgaattcc  
>CD\_NM\_013447.2:1706  
CgCctGcgagtctGGtatGACCTCTGGTCTGGAACCTGAGTTCAAGAGACTCAGGTTCCAGGACCAGAGGGTTTTTTGct  
cgagctggcgaattcc  
>CD\_NM\_013447.2:1892

CgCctGcgagtctGGtatGAGTGCTCTGTGTCTTCTGGGAGTTCAAGAGACTCCCAGAAGACACAGAGCACCTTTTTGct  
cgagctggcgaattcc  
>CD\_NM\_013447.2:2087  
CgCctGcgagtctGGtatGAAGCGTCTCTCTGCTGTGCCTCTTCAAGAGAGAGGCACAGCAGAGAGACGCTTTTTGct  
cgagctggcgaattcc  
>CD\_NM\_013447.2:464  
CgCctGcgagtctGGtatGACGCGTCTTCTCGTCTTCTCTTCAAGAGAGAGAAAGACGAGAAAGACGCGTTTTGct  
cgagctggcgaattcc  
>CD\_NM\_013447.2:667  
CgCctGcgagtctGGtatGATGCAACACTGTCGAAAGTGTCTTCAAGAGAGACACTTTTCGACAGTGTTCACACTTTTTGct  
cgagctggcgaattcc  
>CD\_NM\_013447.2:2533  
CgCctGcgagtctGGtatGACGCCATCTTCTCTGTGAATTTTTCAAGAGAAAATTCACAGAGAAGATGGCGTTTTGct  
cgagctggcgaattcc  
>CD\_NM\_013447.2:2451  
CgCctGcgagtctGGtatGCGGCCCTCACCTTATGGAACACTTCAAGAGAGTGTCCATAAAGGTGAGGCCTTTTGct  
cgagctggcgaattcc  
>CD\_NM\_013447.2:895  
CgCctGcgagtctGGtatGACCTGCCTGGCTTCAAGCTCAATTCAAGAGATTGAGCTTGAAGCCAGGCAGGTTTTGct  
cgagctggcgaattcc  
>CD\_NM\_013447.2:1067  
CgCctGcgagtctGGtatGACCAAACAATACCGTCTGTGAATTCAAGAGATTCACAGACGGTATTGTTGGTTTTGct  
cgagctggcgaattcc  
>CD\_NM\_013447.2:744  
CgCctGcgagtctGGtatGCGCCCAGGATATGAGCCTGTTTTTCAAGAGAAAACAGGCTCATATCCTGGGCTTTTTGct  
cgagctggcgaattcc  
>CD\_NM\_013447.2:2633  
CgCctGcgagtctGGtatGAACAAGGATGCTGGCATTAAATTCAGAGATTTAAATGCCAGCATCCTTGTTTTTGct  
cgagctggcgaattcc  
>CD\_NM\_013447.2:2555  
CgCctGcgagtctGGtatGCGTTCTCTTCTGGTACTCTCTTCAAGAGAGAGAGTCACCAGAAAGAGAACTTTTTGct  
cgagctggcgaattcc  
>CD\_NM\_013447.2:2131  
CgCctGcgagtctGGtatGCCCTGTGTAAAGCCATCCAGAATTCAGAGATTCCTGGATGGCTTTACACAGGATTTTTGct  
cgagctggcgaattcc  
>CD\_NM\_007360:375  
CgCctGcgagtctGGtatGCGGGAGATGAGTGAATTTTCATATTCAGAGATATGAAATTCACTCATCTCCATTTTTGct  
cgagctggcgaattcc  
>CD\_NM\_007360:707  
CgCctGcgagtctGGtatGACAGGCTTCTTGTATGTCTCAATTCAAGAGATTGAGACATAACAAGAAGCCTGGTTTTGct  
cgagctggcgaattcc  
>CD\_NM\_007360:559  
CgCctGcgagtctGGtatGAGAGTGCTGTATTCCTAAACTCTTCAAGAGAGAGTTTAGGAATACAGCACTCCTTTTTGct  
cgagctggcgaattcc  
>CD\_NM\_007360:763  
CgCctGcgagtctGGtatGCCAGGATTTACTTAAACTGGTTTTCAAGAGAACCAGTTTAAAGTAAATCCTGGTTTTGct  
cgagctggcgaattcc  
>CD\_NM\_007360:444  
CgCctGcgagtctGGtatGCAGCAAAGATGTCCAGTAGTCATTCAAGAGATGACTACTGGACATCTTTGCTTTTTGct  
cgagctggcgaattcc  
>CD\_NM\_007360:920  
CgCctGcgagtctGGtatGAAGCTTTAAAGGCTATATAGAATTCAGAGATTCATATAGCCTTTAAAGCTTTTTGct  
cgagctggcgaattcc  
>CD\_NM\_007360.1:941

CgCctGcgagtctGGtatGCACTGTTCAACTCCAAATACATTTCAAGAGAATGTATTTGGAGTTGAACAGTTTTTTTgct  
cgagctggcgaattcc  
>CD\_NM\_007360.1:567  
CgCctGcgagtctGGtatGCATTCCCTAAACTCATTATTCAATTTCAAGAGATTGAATAATGAGTTTAGGAATTTTTTgct  
cgagctggcgaattcc  
>CD\_NM\_007360.1:777  
CgCctGcgagtctGGtatGCACTGGTGAAGTCATATCATTGTTCAAGAGACAATGATATGACTTCACCAGTTTTTTTgct  
cgagctggcgaattcc  
>CD\_NM\_007360.1:893  
CgCctGcgagtctGGtatGCAGGGAGACTGTGCACTCTATGTTCAAGAGACATAGAGTGCACAGTCTCCCTTTTTTgct  
cgagctggcgaattcc  
>CD\_NM\_007360.1:526  
CgCctGcgagtctGGtatGAGGAATCCGTTTCATTATTATGTTCAAGAGACATAATAATGAAACGGATTCCCTTTTTTgct  
cgagctggcgaattcc  
>CD\_NM\_007360.1:730  
CgCctGcgagtctGGtatGCGCCAGCCTTCTGAAAGTATACTTTCAAGAGAGTATACTTTTCAGAAGGCTGGCATTTTTTgct  
cgagctggcgaattcc  
>CD\_NM\_007360.1:859  
CgCctGcgagtctGGtatGATCACCCAACCTACTAACAATATTCAAGAGATATTGTTAGTAGGTTGGGTGAGTTTTTgct  
cgagctggcgaattcc  
>CD\_NM\_007360.1:597  
CgCctGcgagtctGGtatGCTCAAATTCCTTGACCGAAAGTTCAAGAGACTTTCGGTCAAGGGAATTTGAATTTTTTgct  
cgagctggcgaattcc  
>CD\_NM\_007360.1:530  
CgCctGcgagtctGGtatGCTCCGTTTCATTATTATGGTAGTTCAAGAGACTACCATAATAATGAAACGGATTTTTTTgct  
cgagctggcgaattcc  
>CD\_NM\_007360.1:535  
CgCctGcgagtctGGtatGCTTCATTATTATGGTAGCAATATTCAAGAGATATTGCTACCATAATAATGAAATTTTTTgct  
cgagctggcgaattcc  
>CD\_NM\_007360.1:522  
CgCctGcgagtctGGtatGACATGGGAATCCGTTTCATTATTTCAAGAGAATAATGAAACGGATTCCCATGGTTTTTgct  
cgagctggcgaattcc  
>CD\_NM\_007360.1:699  
CgCctGcgagtctGGtatGCTGAGAGCCAGGCTTCTTGTATTTCAAGAGAATAACAAGAAGCCTGGCTCTCATTTTTTgct  
cgagctggcgaattcc  
>CD\_NM\_007360.1:919  
CgCctGcgagtctGGtatGAAGCTTTAAAGGCTATATAGAATTTCAAGAGATTCTATATAGCCTTTAAAGCTTTTTTgct  
cgagctggcgaattcc  
>CD\_NM\_007360.1:618  
CgCctGcgagtctGGtatGATTACTGTGGCCCATGTCCTAATTCAAGAGATTAGGACATGGGCCACAGTAACTTTTTgct  
cgagctggcgaattcc  
>CD\_NM\_007360.1:560  
CgCctGcgagtctGGtatGCGTGCTGTATTCCCTAAACTCATTTTCAAGAGAATGAGTTTAGGAATACAGCACTTTTTTgct  
cgagctggcgaattcc  
>CD\_NM\_007360.1:736  
CgCctGcgagtctGGtatGACTTCTGAAAGTATACAGCAAATTTCAAGAGATTTGCTGTATACTTTTCAGAAGTTTTTgct  
cgagctggcgaattcc  
>CD\_NM\_007360.1:847  
CgCctGcgagtctGGtatGCGGCTCCATTCTCTCACCCAACTTCAAGAGAGTTGGGTGAGAGAATGGAGCCATTTTTTgct  
cgagctggcgaattcc  
>CD\_NM\_007360.1:525  
CgCctGcgagtctGGtatGCGGGAATCCGTTTCATTATTATTTCAAGAGAATAATAATGAAACGGATTCCCATTTTTTgct  
cgagctggcgaattcc  
>CD\_NM\_007360.1:375

CgCtGcgagtctGGtatGAGGAGATGAGTGAATTCATAATTC AAGAGATTATGAAATTC ACTCATCTCCCTTTTGGct  
cgagctggcgaattcc  
>CD\_NM\_007360.1:851  
CgCtGcgagtctGGtatGCCATTCTCTCACCAACCTACTTCAAGAGAGTAGGTTGGGTGAGAGAATGGATTTTGGct  
cgagctggcgaattcc  
>CD\_NM\_007360.1:810  
CgCtGcgagtctGGtatGCACACATTCCAACAAATGGATCTTCAAGAGAGATCCATTTGTTGGAATGTGTATTTTGGct  
cgagctggcgaattcc  
>CD\_NM\_007360.1:752  
CgCtGcgagtctGGtatGCGCAAAGAGGACCAGGATTTACTTCAAGAGAGTAAATCCTGGTCTCTTTGCTTTTTTGGct  
cgagctggcgaattcc  
>CD\_NM\_007360.1:920  
CgCtGcgagtctGGtatGCGCTTTAAAGGCTATATAGAAATTC AAGAGATTTCTATATAGCCTTTAAAGCTTTTTTGGct  
cgagctggcgaattcc  
>CD\_NM\_007360.1:555  
CgCtGcgagtctGGtatGCATGGAGTGCTGTATTCC TAAATTC AAGAGATTTAGGAATACAGCACTCCATATTTTGGct  
cgagctggcgaattcc  
>CD\_NM\_007360.1:787  
CgCtGcgagtctGGtatGATCATATCATTTGGATGGGACTATTCAAGAGATAGTCCCATCCAATGATATGACTTTTTTGGct  
cgagctggcgaattcc  
>CD\_NM\_007360.1:836  
CgCtGcgagtctGGtatGAAGTGGGAAGATGGCTCCATTCTTCAAGAGAGAATGGAGCCATCTTCCC ACTGTTTTTGGct  
cgagctggcgaattcc  
>CD\_NM\_007360.1:575  
CgCtGcgagtctGGtatGCACTCATTATTCAACCAAGAAGTTCAAGAGACTTCTTGGTTGAATAATGAGTTTTTTTGGct  
cgagctggcgaattcc  
>CD\_XM\_040709:435  
CgCtGcgagtctGGtatGAACGCCGTGGAGCTCCACATAATTC AAGAGATTATGTGGAGCTCCACGGCGCTTTTTTGGct  
cgagctggcgaattcc  
>CD\_XM\_040709:900  
CgCtGcgagtctGGtatGAAGCAGGGCAACTGGCAGGAAATTC AAGAGATTTCTGCCAGTTGCCCTGCTTTTTTGGct  
cgagctggcgaattcc  
>CD\_XM\_040709:973  
CgCtGcgagtctGGtatGCGCGAGCAGCTGTGCCAAGAATTC AAGAGATTTCTTGGGCACAGCTGCTCGCATTTTTTGGct  
cgagctggcgaattcc  
>CD\_XM\_040709:1014  
CgCtGcgagtctGGtatGCAGGAACTGGACCTGACCTGTATTCAAGAGATACAGGTCAGGTCCAGTTCTTTTTTGGct  
cgagctggcgaattcc  
>CD\_XM\_040709:1580  
CgCtGcgagtctGGtatGACGGGCCAGGATGGAGACTTTTTTCAAGAGAAAAGTCTCCATCCTGGGCCCGCTTTTTTGGct  
cgagctggcgaattcc  
>CD\_NM\_020440.2:436  
CgCtGcgagtctGGtatGAGCCGTGGAGCTCCACATAAAGTTCAAGAGACTTTATGTGGAGCTCCACGGCGTTTTTGGct  
cgagctggcgaattcc  
>CD\_NM\_020440.2:1836  
CgCtGcgagtctGGtatGCTGAGATGACTTGCAAAGTATCTTCAAGAGAGATACTTTGCAAGTCATCTCAATTTTTTGGct  
cgagctggcgaattcc  
>CD\_NM\_020440.2:1739  
CgCtGcgagtctGGtatGCTCTCCAAGCTGTTAACATATTTCAAGAGAATATGTTAACAGGCTTGGAGAATTTTTTGGct  
cgagctggcgaattcc  
>CD\_NM\_020440.2:1726  
CgCtGcgagtctGGtatGCAGCAAGGATGCTTCTCCAAGTTCAAGAGACTTGGAGAAGACATCCTTGCTTTTTTTGGct  
cgagctggcgaattcc  
>CD\_NM\_020440.2:2250

CgCctGcgagtctGGtatGCTCTGATCAAATTGTTCTGTATTTCAAGAGAATACAGAACAATTTGATCAGATTTTTTGGct  
cgagctggcgaattcc  
>CD\_NM\_020440.2:1808  
CgCctGcgagtctGGtatGCAGCCTTTCTTTGCTGCCGGAATTTCAAGAGATTCGCGCAGCAAAGAAAGGCTTTTTTTGGct  
cgagctggcgaattcc  
>CD\_NM\_020440.2:1020  
CgCctGcgagtctGGtatGCGGACCTGACCTGTAACATCACTTCAAGAGAGTGATGTTACAGGTCAGGTCATTTTTTGGct  
cgagctggcgaattcc  
>CD\_NM\_020440.2:900  
CgCctGcgagtctGGtatGCGCAGGGCAACTGGCAGGAAATTTCAAGAGAATTTCTGCCAGTTGCCCTGCTTTTTTTGGct  
cgagctggcgaattcc  
>CD\_NM\_020440.2:1847  
CgCctGcgagtctGGtatGCGCAAAGTATCTTCCAAGAATATTCAAGAGATATTCTTGAAGATACTTTGCATTTTTTGGct  
cgagctggcgaattcc  
>CD\_NM\_020440.2:2643  
CgCctGcgagtctGGtatGACGTGCGTCTGTCCACGGTCATTTCAAGAGAATGACCGTGGACAGACCGACGCTTTTTTGGct  
cgagctggcgaattcc  
>CD\_NM\_020440.2:2664  
CgCctGcgagtctGGtatGCCGGGCTCCTGTCTCTCATTTCAAGAGAATGAGACAGGACAGGAGCCCGATTTTTTGGct  
cgagctggcgaattcc  
>CD\_NM\_020440.2:1885  
CgCctGcgagtctGGtatGATCTGTTCTCATCATGGCTGAGTTCAAGAGACTCAGCCATGATGAGAACAGAGTTTTTTGGct  
cgagctggcgaattcc  
>CD\_NM\_020440.2:1068  
CgCctGcgagtctGGtatGACGAGGTGACGTGGTCCTTCAGTTCAAGAGACTGAAGGACCACGTACCTCGGTTTTTTGGct  
cgagctggcgaattcc  
>CD\_NM\_020440.2:405  
CgCctGcgagtctGGtatGACGAGATCCTGTTAAGGCGGACTTCAAGAGAGTCCGCCTTAACAGGATCTCGCTTTTTTTGGct  
cgagctggcgaattcc  
>CD\_NM\_020440.2:989  
CgCctGcgagtctGGtatGCAGAATGTGTCTGTGGCTGAAGTTCAAGAGACTTCAGCCACAGACACATTTTTTTGGct  
cgagctggcgaattcc  
>CD\_NM\_020440.2:2151  
CgCctGcgagtctGGtatGAAACCAGTCTCTCCAATCCTATTTCAAGAGAATAGGATTGGAGAGACTGGTTGTTTTTTGGct  
cgagctggcgaattcc  
>CD\_NM\_020440.2:993  
CgCctGcgagtctGGtatGCTGTGTCTGTGGCTGAAGGAAATTTCAAGAGATTTCTTCAGCCACAGACACATTTTTTTGGct  
cgagctggcgaattcc  
>CD\_NM\_020440.2:176  
CgCctGcgagtctGGtatGATGTGCTGGCTCTTTGCCGAGTTCAAGAGACTCGGCAAAGAGCCAACGACAGTTTTTTGGct  
cgagctggcgaattcc  
>CD\_NM\_020440.2:1071  
CgCctGcgagtctGGtatGCGGTGACGTGGTCCTTCAGCAGTTCAAGAGACTGCTGAAGGACCACGTACCTTTTTTTGGct  
cgagctggcgaattcc  
>CD\_NM\_020440.2:1920  
CgCctGcgagtctGGtatGCCCTCTCCAGTCCCAATGAACTTCAAGAGAGTTTCATTGGGACTGGAGAGGTTTTTTGGct  
cgagctggcgaattcc  
>CD\_NM\_020440.2:469  
CgCctGcgagtctGGtatGCTCAGACCAAGGCCACTACAAATTTCAAGAGATTTGTAGTGGCCTTGGTCTGAATTTTTTTGGct  
cgagctggcgaattcc  
>CD\_NM\_020440.2:1172  
CgCctGcgagtctGGtatGATTGCTTTGAGTCATGTGGATGTTCAAGAGACATCCACATGACTCAAAGCAACTTTTTTTGGct  
cgagctggcgaattcc  
>CD\_NM\_020440.2:508

CgCctGcgagtctGGtatGCGATGCCACTGTCCAGGGAACTTCAAGAGAGTTTCCCTGGACAGTGGCATCTTTTTTGct  
cgagctggcgaattcc  
>CD\_NM\_020440.2:303  
CgCctGcgagtctGGtatGCTGACTGGAGCTTCTCATCTTTTTCAAGAGAAAAGATGAGAAGCTCCAGTCAATTTTTTGct  
cgagctggcgaattcc  
>CD\_NM\_020440.2:2519  
CgCctGcgagtctGGtatGATGACTCCATGGGTGAAGTCACTTCAAGAGAGTGACTTCACCCATGGAGTCACTTTTTTGct  
cgagctggcgaattcc  
>CD\_NM\_020440.2:1211  
CgCctGcgagtctGGtatGATGGTTTCGGGATGTTAGCAAAGTTCAAGAGACTTTGCTAACATCCCGAACCAGTTTTTGct  
cgagctggcgaattcc  
>CD\_NM\_020440.2:2671  
CgCctGcgagtctGGtatGACTGTCTCTCATCGGGTACTTCAAGAGAGTACCCGATGAGACAGGACAGGTTTTTGct  
cgagctggcgaattcc  
>CD\_NM\_020440.2:1831  
CgCctGcgagtctGGtatGCACATTTGAGATGACTTGCAAATTCAAGAGATTTGCAAGTCATCTCAAATGTATTTTTGct  
cgagctggcgaattcc  
>CD\_NM\_052868:510  
CgCctGcgagtctGGtatGCGGCCAGGATGCCGGCATTATTCAAGAGATAAATGCCGGCATCCTGGGCCTTTTTTGct  
cgagctggcgaattcc  
>CD\_NM\_052868:1116  
CgCctGcgagtctGGtatGCGCCCTTGGAAGTGTGTGCAATTCAAGAGATTGCACAGCAGTTCCAAGGGCTTTTTTGct  
cgagctggcgaattcc  
>CD\_NM\_052868:1367  
CgCctGcgagtctGGtatGCACCGCTGCCTCGCCAAAGCCTTTCAAGAGAAGGCTTTGGCGAGGCAGCGGTATTTTTTGct  
cgagctggcgaattcc  
>CD\_NM\_052868.1:1284  
CgCctGcgagtctGGtatGACGACACATGCCATGGAGAAGTTCAAGAGACTTCTCCATGGCAATGTGTTCGGTTTTTGct  
cgagctggcgaattcc  
>CD\_NM\_052868.1:1524  
CgCctGcgagtctGGtatGAACTGCCTCCCTGCTGTGCAACTTCAAGAGAGTTGCACAGCAGGGAGGCAGTCTTTTTTGct  
cgagctggcgaattcc  
>CD\_NM\_052868.1:474  
CgCctGcgagtctGGtatGCGGTGATGCCGTGGTGTCAAGTTCAAGAGACTTGAGCACCACGGCATCACTTTTTTGct  
cgagctggcgaattcc  
>CD\_NM\_052868.1:1116  
CgCctGcgagtctGGtatGACCCTTGGAAGTGTGTGCAATTTCAAGAGAATTGCACAGCAGTTCCAAGGGCTTTTTTGct  
cgagctggcgaattcc  
>CD\_NM\_052868.1:1731  
CgCctGcgagtctGGtatGCAGCCATCGGCTGAGACTACACTTCAAGAGAGTGTAGTCTCAGCCGATGGCTTTTTTTGct  
cgagctggcgaattcc  
>CD\_NM\_052868.1:510  
CgCctGcgagtctGGtatGAGCCCAGGATGCCGGCATTATTTCAGAGAATAAATGCCGGCATCCTGGGCCTTTTTTGct  
cgagctggcgaattcc  
>CD\_NM\_052868.1:1848  
CgCctGcgagtctGGtatGATCAGGGCTGTACAGTCTACTTCAAGAGAGTAGACTGTAACAGGCCCTGAGTTTTTGct  
cgagctggcgaattcc  
>CD\_NM\_052868.1:297  
CgCctGcgagtctGGtatGATCCTGCAATGTGACCGGCTATTTCAAGAGAATAGCCGGTACATTGCAGGAGTTTTTGct  
cgagctggcgaattcc  
>CD\_NM\_052868.1:290  
CgCctGcgagtctGGtatGCCTCCATCTCCTGCAATGTGACTTCAAGAGAGTCAATTGCAGGAGATGGAGATTTTTTGct  
cgagctggcgaattcc  
>CD\_NM\_052868.1:195



CgCtGcgagtctGGtatGACCGCTGCTGCTGCTAATGTTCAAGAGACATTAGCAGCAGCAGCAGCGGCTTTTTGct  
cgagctggcgaattcc  
>CD\_NM\_052868.1:964  
CgCtGcgagtctGGtatGCGCACTGCCGCTGAGTGGATTCTTCAAGAGAGAATCCACTCAGCGGCAGTGCATTTTTGct  
cgagctggcgaattcc  
>CD\_NM\_052868.1:801  
CgCtGcgagtctGGtatGCCTGCAGGAAGTGGTGGGAATCTTCAAGAGAGATTCCCACCACTTCTGCAGATTTTTGct  
cgagctggcgaattcc  
>CD\_NM\_052868.1:1434  
CgCtGcgagtctGGtatGCTCCCGCCTCTCCCTGTACATTTCAAGAGAATGTACAGGGAGAGGCCGGGAATTTTTGct  
cgagctggcgaattcc  
>CD\_NM\_052868.1:1162  
CgCtGcgagtctGGtatGAGCCGTCATGCTGCATACTCTGTTCAAGAGACAGAGTATGCAGCATGACGGCCTTTTTGct  
cgagctggcgaattcc  
>CD\_NM\_052868.1:1695  
CgCtGcgagtctGGtatGCGGAGGCCCTGTCAGCGTAGAGTTCAAGAGACTCTACGCTGACAGGGCCTCTTTTTGct  
cgagctggcgaattcc  
>CD\_NM\_052868.1:1398  
CgCtGcgagtctGGtatGATCTGGGACCCGGCTTCGTGAATTTCAAGAGATTCACGAAGCCGGGTCCCAGACTTTTTGct  
cgagctggcgaattcc  
>CD\_NM\_052868.1:381  
CgCtGcgagtctGGtatGCCTGGGCATTGTCAGTACCAAGTTCAAGAGACTTGGTACTGACAATGCCAGTTTTTTGct  
cgagctggcgaattcc  
>CD\_NM\_052868.1:1298  
CgCtGcgagtctGGtatGCGGAGAAGGTGGCATCCAGAACTTCAAGAGAGTTCTGGATGCCACCTTCTCCATTTTTGct  
cgagctggcgaattcc  
>CD\_NM\_052868.1:555  
CgCtGcgagtctGGtatGCACCCGCTACCTGGGCAGCTACTTCAAGAGAGTAGCTGCCAGGTAGCGGGTATTTTTGct  
cgagctggcgaattcc  
>CD\_NM\_052868.1:790  
CgCtGcgagtctGGtatGAGGCGGTCAACTCTGCAGGAAGTTCAAGAGACTTCTGCAGAGTTGACCGCCTTTTTTGct  
cgagctggcgaattcc  
>CD\_NM\_052868.1:1958  
CgCtGcgagtctGGtatGACATCACTTGCTGCTTCATGAATTTCAAGAGATTCATGAAGCAGCAAGTGATGGTTTTTTGct  
cgagctggcgaattcc  
>CD\_NM\_052868.1:1121  
CgCtGcgagtctGGtatGCGGAACTGCTGTGCAATGTGTCTTCAAGAGAGACACATTGCACAGCAGTTCCATTTTTGct  
cgagctggcgaattcc  
>CD\_NM\_052868.1:444  
CgCtGcgagtctGGtatGAGCGGGTGAGGTGCAGGTGCAGTTCAAGAGACTGCACCTGCACCTCACCCGCCTTTTTGct  
cgagctggcgaattcc  
>CD\_NM\_052868.1:1843  
CgCtGcgagtctGGtatGACCCGCTCAGGGCCTGTTACAGTTCAAGAGACTGTAACAGGCCCTGAGCGGGCTTTTTGct  
cgagctggcgaattcc  
>CD\_NM\_052868.1:1656  
CgCtGcgagtctGGtatGCGGCCAGGATGGTGTGGCAGAGTTCAAGAGACTCTGCCACACCATCTGGCCTTTTTTTGct  
cgagctggcgaattcc  
>CD\_NM\_052868.1:1175  
CgCtGcgagtctGGtatGAATACTCTGTAGTTGGGAGATTTCAAGAGAATCTCCAACCTACAGAGTATTTTTTTGct  
cgagctggcgaattcc  
>CD\_NM\_052868.1:1446  
CgCtGcgagtctGGtatGACCTGTACATGTGCGGGAGGAATTTCAAGAGATTCCTCCCGCACATGTACAGGGTTTTTTGct  
cgagctggcgaattcc  
>CD\_NM\_052868.1:285

CgCtGcgagtctGGtatGCGCTGTCTCCATCTCTGCAATTTCAAGAGAATTGCAGGAGATGGAGACAGCTTTTTTGct  
cgagctggcgaattcc  
>CD\_NM\_052868.1:204  
CgCtGcgagtctGGtatGACTGCTGCTAATGCTAGGAATGTTCAAGAGACATTCCTAGCATTAGCAGCAGCTTTTTTGct  
cgagctggcgaattcc  
>CD\_NM\_052868.1:1267  
CgCtGcgagtctGGtatGAGCCCTGGCTATGAGGGCCGACTTCAAGAGAGTCGGCCCTCATAGCCAGGGCCTTTTTTGct  
cgagctggcgaattcc  
>CD\_NM\_004335:125  
CgCtGcgagtctGGtatGCGCCCTTGATTATCTTCACCATTTCAAGAGAATGGTGAAGATAATCAAGGGCCTTTTTTGct  
cgagctggcgaattcc  
>CD\_NM\_004335:317  
CgCtGcgagtctGGtatGCTGCAGAGAAGGCCAAGGACATTCAAGAGATGTCCTTGGGCCTTCTCTGCATTTTTTGct  
cgagctggcgaattcc  
>CD\_NM\_004335:236  
CgCtGcgagtctGGtatGCGGCCAGAAGGGCTTTCAGGATTCAAGAGATCCTGAAAGCCCTTCTGGGCCTTTTTTGct  
cgagctggcgaattcc  
>CD\_NM\_004335:268  
CgCtGcgagtctGGtatGAAGGCCGCCACCTGCAACCACATTCAAGAGATGTGGTTGCAGGTGGCGGCCTTTTTTGct  
cgagctggcgaattcc  
>CD\_NM\_004335:364  
CgCtGcgagtctGGtatGAAGATCACTACATTAACCATATTCAAGAGATATGGTTTAATGTAGTGATCTTTTTTGct  
cgagctggcgaattcc  
>CD\_NM\_004335:358  
CgCtGcgagtctGGtatGAAGGGAGAGATCACTACATTAATTCAAGAGATTAATGTAGTGATCTCTCCCTTTTTTGct  
cgagctggcgaattcc  
>CD\_NM\_004335:442  
CgCtGcgagtctGGtatGCGCGTGAGAATCGCGGACAAGATTCAAGAGATCTTGTCCGCGATTCTCACGCTTTTTTGct  
cgagctggcgaattcc  
>CD\_NM\_004335:94  
CgCtGcgagtctGGtatGATGGTGCTCCTGATCATCGTGATTCAAGAGATCACGATGATCAGGAGCACCAGTTTTTGct  
cgagctggcgaattcc  
>CD\_NM\_004335:283  
CgCtGcgagtctGGtatGCACCACACTGTGATGGCCCTAATTCAAGAGATTAGGGCCATCACAGTGTGGTTTTTTTTGct  
cgagctggcgaattcc  
>CD\_NM\_004335.2:127  
CgCtGcgagtctGGtatGACTTGATTATCTTCACCATCAATTCAAGAGATTGATGGTGAAGATAATCAAGGTTTTTGct  
cgagctggcgaattcc  
>CD\_NM\_004335.2:206  
CgCtGcgagtctGGtatGAACCCATCTCCTGCAACAAGAGTTCAAGAGACTCTTGTTCAGGAGATGGGTGTTTTTGct  
cgagctggcgaattcc  
>CD\_NM\_004335.2:317  
CgCtGcgagtctGGtatGCGCAGAGAAGGCCAAGGACAATTCAAGAGATTGTCCTTGGGCCTTCTCTGCATTTTTTGct  
cgagctggcgaattcc  
>CD\_NM\_004335.2:442  
CgCtGcgagtctGGtatGACGTGAGAATCGCGGACAAGAATTCAAGAGATTCTTGTCCGCGATTCTCACGCTTTTTTGct  
cgagctggcgaattcc  
>CD\_NM\_004335.2:236  
CgCtGcgagtctGGtatGAGCCCAGAAGGGCTTTCAGGATTTCAAGAGAATCCTGAAAGCCCTTCTGGGCCTTTTTTGct  
cgagctggcgaattcc  
>CD\_NM\_004335.2:268  
CgCtGcgagtctGGtatGCGGCCGCCACCTGCAACCACACTTCAAGAGAGTGTGGTTGCAGGTGGCGGCCTTTTTTGct  
cgagctggcgaattcc  
>CD\_NM\_004335.2:248

CgCctGcgagtctGGtatGATTTCAAGGATGTGGAGGCCAGTTCAAGAGACTGGGCCTCCACATCCTGAAAGTTTTTGct  
cgagctggcgaattcc  
>CD\_NM\_004335.2:369  
CgCctGcgagtctGGtatGCCTACATTAACCATAAGCTTCTTCAAGAGAGAAGCTTATGGTTTAATGTAGTTTTTTGct  
cgagctggcgaattcc  
>CD\_NM\_004335.2:203  
CgCctGcgagtctGGtatGCGTCACCCATCTCCTGCAACAATTCAAGAGATTGTTGCAGGAGATGGGTGACATTTTTTGct  
cgagctggcgaattcc  
>CD\_NM\_004335.2:407  
CgCctGcgagtctGGtatGAGTGGAGCGACTGAGAAGAGAATTCAAGAGATTCTTCTCAGTCGCTCCACCTTTTTTGct  
cgagctggcgaattcc  
>CD\_NM\_004335.2:364  
CgCctGcgagtctGGtatGCGATCACTACATTAACCATAAATTCAAGAGATTATGGTTTAATGTAGTGATCTTTTTTGct  
cgagctggcgaattcc  
>CD\_NM\_004335.2:194  
CgCctGcgagtctGGtatGATGTGCAATGTCACCCATCTCTTCAAGAGAGAGATGGGTGACATTGCGACACTTTTTTGct  
cgagctggcgaattcc  
>CD\_NM\_004335.2:125  
CgCctGcgagtctGGtatGACCCTTGATTATCTTACCATCTTCAAGAGAGATGGTGAAGATAATCAAGGGCTTTTTTGct  
cgagctggcgaattcc  
>CD\_NM\_004335.2:440  
CgCctGcgagtctGGtatGCAGCGTGAGAATCGCGGACAAGTTCAAGAGACTTGTCCGCGATTCTCACGCTTTTTTTGct  
cgagctggcgaattcc  
>CD\_NM\_004335.2:533  
CgCctGcgagtctGGtatGAAGCGCTCTGCTGCAGTGAGATTTCAAGAGAATCTCACTGCAGCAGAGCGCTGTTTTTGct  
cgagctggcgaattcc  
>CD\_NM\_004335.2:89  
CgCctGcgagtctGGtatGCATTCTGGTGCTCCTGATCATCTTCAAGAGAGATGATCAGGAGCACCAGAATTTTTTTGct  
cgagctggcgaattcc  
>CD\_NM\_004335.2:349  
CgCctGcgagtctGGtatGCGGAGCTTGAGGGAGAGATCACTTCAAGAGAGTGATCTCTCCCTCAAGCTCCTTTTTTGct  
cgagctggcgaattcc  
>CD\_NM\_004335.2:302  
CgCctGcgagtctGGtatGCATGGCTTCCCTGGATGCAGAGTTCAAGAGACTCTGCATCCAGGGAAGCCATTTTTTTGct  
cgagctggcgaattcc  
>CD\_NM\_004335.2:11  
CgCctGcgagtctGGtatGAGCATCTACTTCGTATGACTATTTCAAGAGAATAGTCATACGAAGTAGATGCCTTTTTTGct  
cgagctggcgaattcc  
>CD\_NM\_004335.2:283  
CgCctGcgagtctGGtatGCCACACTGTGATGGCCCTAATTTCAAGAGAATTAGGGCCATCACAGTGTGGTTTTTTGct  
cgagctggcgaattcc  
>CD\_NM\_004335.2:10  
CgCctGcgagtctGGtatGCGGCATCTACTTCGTATGACTATTCAAGAGATAGTCATACGAAGTAGATGCCATTTTTTGct  
cgagctggcgaattcc  
>CD\_NM\_004335.2:359  
CgCctGcgagtctGGtatGAGGAGAGATCACTACATTAACCTTCAAGAGAGTTTAATGTAGTGATCTCTCCCTTTTTTGct  
cgagctggcgaattcc  
>CD\_NM\_004335.2:134  
CgCctGcgagtctGGtatGCATCTTACCATCAAGGCCAACTTCAAGAGAGTTGGCCTTGATGGTGAAGATATTTTTGct  
cgagctggcgaattcc  
>CD\_NM\_004335.2:124  
CgCctGcgagtctGGtatGCGCCCTTGATTATCTTACCATTTCAAGAGAATGGTGAAGATAATCAAGGGCATTTTTTGct  
cgagctggcgaattcc  
>CD\_NM\_178181:297

CgCctGcgagtctGGtatGCCCTGTTACATCGTCATTTCTTTCAAGAGAAGAAATGACGATGTAACAGGGTTTTTTGct  
cgagctggcgaattcc  
>CD\_NM\_178181:916  
CgCctGcgagtctGGtatGAGGGCCAGCGTCTCCTTCCCTCATTTCAAGAGATGAGGAAGGAGACGCTGGCCCGTTTTTTGct  
cgagctggcgaattcc  
>CD\_NM\_178181:339  
CgCctGcgagtctGGtatGATCCATCAAGTCTGGAGAAAGATTCAAGAGATCTTTCTCCAGACTTGATGGACTTTTTTGct  
cgagctggcgaattcc  
>CD\_NM\_178181:943  
CgCctGcgagtctGGtatGCACCTCTCCAACCTGTGAGAGGATTCAAGAGATCCTCTCACAGTTGGAGAGGTTTTTTTGct  
cgagctggcgaattcc  
>CD\_NM\_178181:386  
CgCctGcgagtctGGtatGATCCTGAGAATCACTTTGTTCATTTCAAGAGAATGACAAAGTGATTCTCAGGACTTTTTTGct  
cgagctggcgaattcc  
>CD\_NM\_178181:524  
CgCctGcgagtctGGtatGCAGCTCATAAGAGCATCGGTTTTTTCAAGAGAAAACCGATGCTCTTATGAGCTTTTTTTTGct  
cgagctggcgaattcc  
>CD\_NM\_022842.3:2188  
CgCctGcgagtctGGtatGAGCTCATCATTTGCTGTGTGAATTCAAGAGATTCACACAGCAAATGATGAGCCTTTTTTGct  
cgagctggcgaattcc  
>CD\_NM\_022842.3:916  
CgCctGcgagtctGGtatGAGGCCAGCGTCTCCTTCCCTCAATTCAAGAGATTGAGGAAGGAGACGCTGGCCCTTTTTTGct  
cgagctggcgaattcc  
>CD\_NM\_022842.3:299  
CgCctGcgagtctGGtatGATGTTACATCGTCATTTCTAAATTCAAGAGATTTAGAAATGACGATGTAACAGTTTTTTGct  
cgagctggcgaattcc  
>CD\_NM\_022842.3:2594  
CgCctGcgagtctGGtatGAACAGACATTCCTTACTGAACTTCAAGAGAGTTCAGTAAGGGAATGTCTGTGTTTTTTGct  
cgagctggcgaattcc  
>CD\_NM\_022842.3:2526  
CgCctGcgagtctGGtatGACTCCTGAGTCTGAGAGTGAACCTTCAAGAGAGTTCCTCTCAGACTCAGGAGTTTTTTGct  
cgagctggcgaattcc  
>CD\_NM\_022842.3:1892  
CgCctGcgagtctGGtatGATGCCTGACTTTCTTTAAGGAGTTCAGAGACTCCTTAAAGAAAGTCAGGCAGTTTTTTGct  
cgagctggcgaattcc  
>CD\_NM\_022842.3:1392  
CgCctGcgagtctGGtatGAACCGGTACTGCCAAAGGAAATTTCAAGAGAATTTCTTTGGCAGTACCGGTGTTTTTTGct  
cgagctggcgaattcc  
>CD\_NM\_022842.3:1733  
CgCctGcgagtctGGtatGAACGGTGTCTTTTATACCTTATTTCAAGAGAATAAGGTATAAAGGACACCGTCTTTTTTGct  
cgagctggcgaattcc  
>CD\_NM\_022842.3:375  
CgCctGcgagtctGGtatGCGCTGCCAGAGTCTGAGAATCTTCAAGAGAGATTCTCAGGACTCTGGCAGCTTTTTTTGct  
cgagctggcgaattcc  
>CD\_NM\_022842.3:804  
CgCctGcgagtctGGtatGAAGTCTGTGTTGAGGGTGAAGTTCAAGAGACTTCACCCTCAAACACAGACTTTTTTTGct  
cgagctggcgaattcc  
>CD\_NM\_022842.3:1523  
CgCctGcgagtctGGtatGCGCCAGAAGCTGCAGCAGCATTTCAAGAGAATGCTGCTGCAGCTTCTGGGCTTTTTTTGct  
cgagctggcgaattcc  
>CD\_NM\_022842.3:1745  
CgCctGcgagtctGGtatGCATACCTTATTTCAAGAGGAATTCAAGAGATTCCTCTTTGAAATAAGGTATTTTTTTGct  
cgagctggcgaattcc  
>CD\_NM\_022842.3:2240

CgCctGcgagtctGGtatGAGCTGTGGGTATCTACAATGACTTCAAGAGAGTCATTGTAGATACCCACAGCGTTTTTgct  
cgagctggcgaattcc  
>CD\_NM\_022842.3:386  
CgCctGcgagtctGGtatGCCCTGAGAATCACTTTGTTCATATTCAAGAGATATGACAAAGTGATTCTCAGGATTTTTGct  
cgagctggcgaattcc  
>CD\_NM\_022842.3:1888  
CgCctGcgagtctGGtatGCGGCCTGCCTGACTTTCTTTAATTCAAGAGATTAAGAAAGTCAGGCAGGCCATTTTTGct  
cgagctggcgaattcc  
>CD\_NM\_022842.3:1334  
CgCctGcgagtctGGtatGCTGTGATGATCTGACACGTCTGTTCAAGAGACAGACGTGTCAGATCATCACAATTTTTGct  
cgagctggcgaattcc  
>CD\_NM\_022842.3:424  
CgCctGcgagtctGGtatGCTGACTGTATGTCAGGCCATGTTCAAGAGACATGGGCCTGACATACAGTCAATTTTTGct  
cgagctggcgaattcc  
>CD\_NM\_022842.3:2086  
CgCctGcgagtctGGtatGCAGACCTGCTCTTCTCGGTGACTTCAAGAGAGTCACCGAGAAGAGCAGGTCTATTTTTGct  
cgagctggcgaattcc  
>CD\_NM\_022842.3:337  
CgCctGcgagtctGGtatGCGTCCATCAAGTCTGGAGAAAGTTCAAGAGACTTCTCCAGACTTGATGGACATTTTTGct  
cgagctggcgaattcc  
>CD\_NM\_022842.3:1738  
CgCctGcgagtctGGtatGCGTCCTTTATACCTTATTTCAATTCAAGAGATTGAAATAAGGTATAAAGGACATTTTTGct  
cgagctggcgaattcc  
>CD\_NM\_022842.3:1349  
CgCctGcgagtctGGtatGCCGTCTGTGGATGAATGTGGAATTCAAGAGATTCCACATTCATCCACAGACGTTTTTgct  
cgagctggcgaattcc  
>CD\_NM\_022842.3:1451  
CgCctGcgagtctGGtatGACCTGTGGAGCTGCATGACTTCTTCAAGAGAGAAGTCATGCAGCTCCACAGGCTTTTTGct  
cgagctggcgaattcc  
>CD\_NM\_022842.3:673  
CgCctGcgagtctGGtatGCTGGCACTGTGTCCCGGATCAATTCAAGAGATTGATCCGGGACACAGTGCCATTTTTGct  
cgagctggcgaattcc  
>CD\_NM\_022842.3:2032  
CgCctGcgagtctGGtatGCTCACAGCTTCTGGGTCAACATTTCAAGAGAATGTTGACCCAGAAGCTGTGATTTTTGct  
cgagctggcgaattcc  
>CD\_NM\_022842.3:524  
CgCctGcgagtctGGtatGCGCTCATAAGAGCATCGGTTTATTCAAGAGATAAACCGATGCTCTTATGAGCTTTTTTgct  
cgagctggcgaattcc  
>CD\_NM\_022842.3:1418  
CgCctGcgagtctGGtatGATCACTCCAGGTGCCAGTACTTCAAGAGAGTCACTGGGCACCTGGAGTGAGTTTTTgct  
cgagctggcgaattcc  
>CD\_NM\_022842.3:2044  
CgCctGcgagtctGGtatGAGGTCAACATCTCTAACTGCAGTTCAAGAGACTGCAGTTAGAGATGTTGACCCTTTTTGct  
cgagctggcgaattcc  
>CD\_NM\_021181:388  
CgCctGcgagtctGGtatGCACGAGCACCTGTCAAAGCCTATTCAAGAGATAGGCTTTGACAGGTGCTCGTATTTTTGct  
cgagctggcgaattcc  
>CD\_NM\_021181:865  
CgCctGcgagtctGGtatGCACGACACAATCCCTCACACTATTCAAGAGATAGTGTGAGGGATTGTGTCGTATTTTTGct  
cgagctggcgaattcc  
>CD\_NM\_021181.3:816  
CgCctGcgagtctGGtatGCGTCGGGAACTCCTAACATATTTCAAGAGAATATGTTAGGAGTTCCCGACATTTTTGct  
cgagctggcgaattcc  
>CD\_NM\_021181.3:654

CgCctGcgagtctGGtatGATCTGTGAAGGTGCTGCTGATGTTCAAGAGACATCAGCAGCACCTTCACAGAGTTTTTGct  
cgagctggcgaattcc  
>CD\_NM\_021181.3:32  
CgCctGcgagtctGGtatGCTGCCTCACCTCATCTATATCTTCAAGAGAGATATAGATGAGGGTGAGGCATTTTTTGct  
cgagctggcgaattcc  
>CD\_NM\_021181.3:745  
CgCctGcgagtctGGtatGAGCTATTTCTTTGGTTTTCTGAATTC AAGAGATTCAGAAACCAAAGAAATAGCCTTTTTTGct  
cgagctggcgaattcc  
>CD\_NM\_021181.3:413  
CgCctGcgagtctGGtatGAACCATGGGTCTGCAGAGCAATTTCAAGAGAATTGCTCTGCAGACCCATGGTGTTTTTGct  
cgagctggcgaattcc  
>CD\_NM\_021181.3:166  
CgCctGcgagtctGGtatGCTGTCTGGACCTTCAACACAACCTTCAAGAGAGTTGTGTTGAAGGTCCAGACAATTTTTGct  
cgagctggcgaattcc  
>CD\_NM\_021181.3:394  
CgCctGcgagtctGGtatGCCCTGTCAAAGCCTAAAGTCACTTCAAGAGAGTGACTTTAGGCTTTGACAGGTTTTTGct  
cgagctggcgaattcc  
>CD\_NM\_021181.3:865  
CgCctGcgagtctGGtatGCCGACACAATCCCTCACACTAATTCAAGAGATTAGTGTGAGGGATTGTGTCGTTTTTGct  
cgagctggcgaattcc  
>CD\_NM\_021181.3:873  
CgCctGcgagtctGGtatGCTCCCTCACACTAATAGAACAATTC AAGAGATTGTTCTATTAGTGTGAGGGATTTTTTGct  
cgagctggcgaattcc  
>CD\_NM\_021181.3:605  
CgCctGcgagtctGGtatGAAGGAACCTGTGTCAGCAGAACTTCAAGAGAGTTTCTGCTGACAGGGTTCTGTTTTTGct  
cgagctggcgaattcc  
>CD\_NM\_021181.3:388  
CgCctGcgagtctGGtatGCCGAGCACCTGTCAAAGCCTAATTCAAGAGATTAGGCTTTGACAGGTGCTCGTTTTTGct  
cgagctggcgaattcc  
>CD\_NM\_021181.3:287  
CgCctGcgagtctGGtatGACTCAGCAAACCTGAAGAAGAATTTCAAGAGAATTCTTCTTTCAGTTTGCTGAGCTTTTTGct  
cgagctggcgaattcc  
>CD\_NM\_021181.3:41  
CgCctGcgagtctGGtatGACTCATCTATATCCTTTGGCAGTTCAAGAGACTGCCAAAGGATATAGATGAGTTTTTGct  
cgagctggcgaattcc  
>CD\_NM\_021181.3:722  
CgCctGcgagtctGGtatGACTGCTCAGTCTCTTTGTACTGTTCAAGAGACAGTACAAAGAGACTGAGCAGGTTTTTGct  
cgagctggcgaattcc  
>CD\_NM\_021181.3:419  
CgCctGcgagtctGGtatGAGGTCTGCAGAGCAATAAGAATTTCAAGAGAATTCTTATTGCTCTGCAGACCTTTTTGct  
cgagctggcgaattcc  
>CD\_NM\_021181.3:521  
CgCctGcgagtctGGtatGCGCAGCCAATGAGTCCCATAATTTCAAGAGAATTATGGGACTCATTGGCTGCTTTTTTGct  
cgagctggcgaattcc  
>CD\_NM\_021181.3:978  
CgCctGcgagtctGGtatGCTGCCAGACACACCAAGGCTATTTCAAGAGAATAGCCTTGGTGTGTCTGGCATTTTTTGct  
cgagctggcgaattcc  
>CD\_NM\_021181.3:160  
CgCctGcgagtctGGtatGCCTCTATTGTCTGGACCTTCAATTC AAGAGATTGAAGGTCCAGACAATAGAGTTTTTGct  
cgagctggcgaattcc  
>CD\_NM\_021181.3:695  
CgCctGcgagtctGGtatGACTCCTGTGTCCTGTTGGTGTTC AAGAGACACCAACAGGAGACACAGGAGTTTTTGct  
cgagctggcgaattcc  
>CD\_NM\_021181.3:278

CgCctGcgagtctGGtatGATCCCTGAAGCTCAGCAAACGTTC AAGAGACAGTTTGCTGAGCTTCAGGGAGTTTTTGct  
cgagctggcgaattcc  
>CD\_NM\_021181.3:867  
CgCctGcgagtctGGtatGAACACAATCCCTCACACTAATATTCAAGAGATATTAGTGTGAGGGATTGTGTCTTTTTTGct  
cgagctggcgaattcc  
>CD\_NM\_021181.3:998  
CgCctGcgagtctGGtatGCTTTGCCTATGAGAATGTTATCTTCAAGAGAGATAACATTCTCATAGGCAAATTTTTTGct  
cgagctggcgaattcc  
>CD\_NM\_021181.3:752  
CgCctGcgagtctGGtatGCCTTTGGTTTCTGAAGAGAGAGTTCAAGAGACTCTCTCTTCAGAAACCAAAGATTTTTTGct  
cgagctggcgaattcc  
>CD\_NM\_021181.3:374  
CgCctGcgagtctGGtatGAGTGCTGCATGTCCTACGAGCACTTCAAGAGAGTGCTCGTAGACATGCAGCACGTTTTTGct  
cgagctggcgaattcc  
>CD\_NM\_021181.3:409  
CgCctGcgagtctGGtatGCAGTCACCATGGGTCTGCAGAGTTCAAGAGACTCTGCAGACCCATGGTGACTTTTTTTGct  
cgagctggcgaattcc  
>CD\_NM\_021181.3:280  
CgCctGcgagtctGGtatGACCTGAAGCTCAGCAAACGTTC AAGAGATTCAAGAGATTGCTGAGCTTCAGGGTTTTTGct  
cgagctggcgaattcc  
>CD\_NM\_021181.3:779  
CgCctGcgagtctGGtatGCGAAGAGTACATTGAAGAGAAGTTCAAGAGACTTCTCTTCAATGTACTCTTCTTTTTTGct  
cgagctggcgaattcc  
>CD\_NM\_021181.3:805  
CgCctGcgagtctGGtatGAAGTGGACATTTGTCTGGGAAACTTCAAGAGAGTTTCCCGACAAATGTCCACTTTTTTTGct  
cgagctggcgaattcc  
>CD\_NM\_021181.3:720  
CgCctGcgagtctGGtatGATCCTGCTCAGTCTCTTTGTACTTCAAGAGAGTACAAAGAGACTGAGCAGGAGTTTTTTGct  
cgagctggcgaattcc  
>CD\_NM\_021181.3:771  
CgCctGcgagtctGGtatGAAGAGACAAGAAGAGTACATTGTTCAAGAGACAATGTACTCTTCTTGTCTCTTTTTTGct  
cgagctggcgaattcc  
>CD\_NM\_021181.3:875  
CgCctGcgagtctGGtatGACCTCACACTAATAGAACAATCTTCAAGAGAGATTGTTCTATTAGTGTGAGGGTTTTTTGct  
cgagctggcgaattcc  
>CD\_NM\_016579:340  
CgCctGcgagtctGGtatGCGCCATGTACCCAGAAAGGGCATTCAAGAGATGCCCTTTCTGGGTACATGGCTTTTTTTGct  
cgagctggcgaattcc  
>CD\_NM\_016579:552  
CgCctGcgagtctGGtatGAACGAGCTCGGCTGTGGAACCATTCAAGAGATGGTTCACAGCCGAGCTCGTCTTTTTTGct  
cgagctggcgaattcc  
>CD\_NM\_016579:635  
CgCctGcgagtctGGtatGAACCTCTCTCAGGAATGCCACATTCAAGAGATGTGGCATTCTGAGAGAGGTGTTTTTTGct  
cgagctggcgaattcc  
>CD\_NM\_016579:689  
CgCctGcgagtctGGtatGACCTCTGTCTGGGAATGCCACATTCAAGAGATGTGGCATTCCCGACAGAGGGTTTTTTGct  
cgagctggcgaattcc  
>CD\_NM\_016579:876  
CgCctGcgagtctGGtatGCCCTGCTGCTGTCAGAACAGATTCAAGAGATCTGTTCTGACAGCAGCAGGGATTTTTTTGct  
cgagctggcgaattcc  
>CD\_NM\_016579.2:876  
CgCctGcgagtctGGtatGACCTGCTGCTGTCAGAACAGAATTCAAGAGATTCTGTTCTGACAGCAGCAGGGTTTTTTGct  
cgagctggcgaattcc  
>CD\_NM\_016579.2:624

CgCctGcgagtctGGtatGCGGAGAGTGTACCTCTCTCAGTTCAAGAGACTGAGAGAGGTGACACTCTCCATTTTTGct  
cgagctggcgaattcc  
>CD\_NM\_016579.2:613  
CgCctGcgagtctGGtatGACCTGTGACCTGGAGAGTGTCTTCAAGAGAGACTCTCCAGGGTCACAGGGTTTTTGct  
cgagctggcgaattcc  
>CD\_NM\_016579.2:667  
CgCctGcgagtctGGtatGACCTGTGACCTGGAGAGTGTCTTCAAGAGAGACTCTCCAGGGTCACAGGGTTTTTGct  
cgagctggcgaattcc  
>CD\_NM\_016579.2:874  
CgCctGcgagtctGGtatGATCCCTGCTGCTGTCAGAACAGTTCAAGAGACTGTTCTGACAGCAGCAGGGACTTTTTGct  
cgagctggcgaattcc  
>CD\_NM\_016579.2:568  
CgCctGcgagtctGGtatGCACCAATGAGATCCTCCCGGAATTCAAGAGATTCCGGGAGGATCTCATTTGGTTTTTTGct  
cgagctggcgaattcc  
>CD\_NM\_016579.2:704  
CgCctGcgagtctGGtatGACCACATCCTCCTCTGCCGGAGTTCAAGAGACTCCGGCAGAGGAGGATGTGGCTTTTTGct  
cgagctggcgaattcc  
>CD\_NM\_016579.2:554  
CgCctGcgagtctGGtatGAAGCTCGGCTGTGGAACCAATGTTCAAGAGACATTGGTTCCACAGCCGAGCTTTTTGct  
cgagctggcgaattcc  
>CD\_NM\_016579.2:468  
CgCctGcgagtctGGtatGACGAGCTCCGTTGCACGCTGAGTTCAAGAGACTCAGCGTGCAACGGAGCTCGTTTTGct  
cgagctggcgaattcc  
>CD\_NM\_016579.2:84  
CgCctGcgagtctGGtatGAGCAGGTTGGAGCGTGGCGAACTTCAAGAGAGTTCCGCACGCTCCAACCTGCGTTTTGct  
cgagctggcgaattcc  
>CD\_NM\_016579.2:270  
CgCctGcgagtctGGtatGACCTCACCTGGCGCTGCGACAGTTCAAGAGACTGTGCGCAGCGCCAGGTGAGGGTTTTGct  
cgagctggcgaattcc  
>CD\_NM\_016579.2:628  
CgCctGcgagtctGGtatGAAGTGTACCTCTCTCAGGAATTTCAAGAGAATTCCTGAGAGAGGTGACACTTTTTGct  
cgagctggcgaattcc  
>CD\_NM\_016579.2:549  
CgCctGcgagtctGGtatGACGACGAGCTCGGCTGTGGAACCTTCAAGAGAGTTCCACAGCCGAGCTCGTCGTTTTGct  
cgagctggcgaattcc  
>CD\_NM\_016579.2:622  
CgCctGcgagtctGGtatGACTGGAGAGTGTACCTCTCTCTTCAAGAGAGAGAGAGGTGACACTCTCCAGGTTTTGct  
cgagctggcgaattcc  
>CD\_NM\_016579.2:475  
CgCctGcgagtctGGtatGACGTTGCACGCTGAGCGATGACTTCAAGAGAGTCATCGCTCAGCGTGCAACGGTTTTGct  
cgagctggcgaattcc  
>CD\_NM\_016579.2:285  
CgCctGcgagtctGGtatGACGACAGGGACTTGGACTGCAGTTCAAGAGACTGCAGTCCAAGTCCCTGTCGTTTTGct  
cgagctggcgaattcc  
>CD\_NM\_016579.2:639  
CgCctGcgagtctGGtatGATCTCAGGAATGCCACAACCATTTCAAGAGAATGGTTGTGGCATTCTGAGAGTTTTGct  
cgagctggcgaattcc  
>CD\_NM\_016579.2:395  
CgCctGcgagtctGGtatGCCCGGCGTCAGTGACTGCTCTGTTCAAGAGACAGAGCAGTCACTGACGCCGTTTTGct  
cgagctggcgaattcc  
>CD\_NM\_016579.2:552  
CgCctGcgagtctGGtatGCCGAGCTCGGCTGTGGAACCAATTCAAGAGATTGGTTCCACAGCCGAGCTCGTTTTGct  
cgagctggcgaattcc  
>CD\_NM\_016579.2:487



CgCctGcgagtctGGtatGAAGCGATGACTGCATTCCACTCTTCAAGAGAGAGTGAATGCAGTCATCGCTCTTTTTGct  
cgagctggcgaattcc  
>CD\_NM\_016579.2:558  
CgCctGcgagtctGGtatGCCGGCTGTGGAACCAATGAGATTTCAAGAGAATCTCATTGGTTCCACAGCCGATTTTTGct  
cgagctggcgaattcc  
>CD\_NM\_016579.2:853  
CgCctGcgagtctGGtatGATTACTGGTGGCCATGAAGGAGTTCAAGAGACTCCTTCATGGCCACCAGTAACTTTTGct  
cgagctggcgaattcc  
>CD\_NM\_016579.2:421  
CgCctGcgagtctGGtatGCACTGACAAGAACTGCGCAACTTCAAGAGAGTTGCGCAGTTTCTTGTGTCAGTTTTTTTTGct  
cgagctggcgaattcc  
>CD\_NM\_016579.2:635  
CgCctGcgagtctGGtatGCCCTCTCTCAGGAATGCCACAATTCAAGAGATTGTGGCATTCTGAGAGAGGTTTTTTGct  
cgagctggcgaattcc  
>CD\_NM\_016579.2:774  
CgCctGcgagtctGGtatGCGCTCAGTGCAAGCCTGGTCACTTCAAGAGAGTGACCAGGCTTGCCTGAGCATTTTTTGct  
cgagctggcgaattcc  
>CD\_NM\_016579.2:525  
CgCctGcgagtctGGtatGACCACCAGACTGTCCCGACTCTTCAAGAGAGAGTCGGGACAGTCTGGGTGGCTTTTTGct  
cgagctggcgaattcc  
>CD\_NM\_016579.2:689  
CgCctGcgagtctGGtatGACCTCTGTCGGGAATGCCACATTTCAAGAGAATGTGGCATTCCCGACAGAGGGTTTTTTGct  
cgagctggcgaattcc  
>CD\_NM\_016579.2:340  
CgCctGcgagtctGGtatGACCATGTACCCAGAAAGGGCAATTCAAGAGATTGCCCTTTCTGGGTACATGGCTTTTTTTGct  
cgagctggcgaattcc  
>CD\_AF172398:428  
CgCctGcgagtctGGtatGAGGGAGGTCAAGGTCAAGCTCATTCAAGAGATGAGCTTGACCTTGACCTCCCCTTTTTGct  
cgagctggcgaattcc  
>CD\_AF172398:449  
CgCctGcgagtctGGtatGCTCGTGCTTGTGCCTCCATCCATTCAAGAGATGGATGGAGGCACAAGCACGATTTTTTTGct  
cgagctggcgaattcc  
>CD\_AF172398:576  
CgCctGcgagtctGGtatGCTGGGATAGTGATGCCTACGAATTTCAAGAGATTCGTAGGCATCACTATCCCATTTTTTTGct  
cgagctggcgaattcc  
>CD\_AF172398:853  
CgCctGcgagtctGGtatGCAGCCGAGGCCACTTTGACAGATTCAAGAGATCTGTCAAAGTGGCCTCGGCTATTTTTTTGct  
cgagctggcgaattcc  
>CD\_AF172398:860  
CgCctGcgagtctGGtatGAGCCACTTTGACAGAACAAGATTCAAGAGATCTTTGTTCTGTCAAAGTGGCCTTTTTTTGct  
cgagctggcgaattcc  
>CD\_NM\_144504:853  
CgCctGcgagtctGGtatGCAGCCGAGGCCACTTTGACAGATTCAAGAGATCTGTCAAAGTGGCCTCGGCTATTTTTTTGct  
cgagctggcgaattcc  
>CD\_NM\_144504:628  
CgCctGcgagtctGGtatGCTCCTATGTCTGAATCCCACATTCAAGAGATGTGGGATTGAGGACATAGGAATTTTTTTGct  
cgagctggcgaattcc  
>CD\_NM\_144504:860  
CgCctGcgagtctGGtatGAGCCACTTTGACAGAACAAGATTCAAGAGATCTTTGTTCTGTCAAAGTGGCCTTTTTTTGct  
cgagctggcgaattcc  
>CD\_NM\_144504:449  
CgCctGcgagtctGGtatGCTCGTGCTTGTGCCTCCATCCATTCAAGAGATGGATGGAGGCACAAGCACGATTTTTTTGct  
cgagctggcgaattcc  
>CD\_NM\_144504:576

CgCctGcgagtctGGtatGCTGGGATAGTGATGCCTACGAATTCAAGAGATTCGTAGGCATCACTATCCCATTTTTTGct  
cgagctggcgaattcc  
>CD\_NM\_016946.3:673  
CgCctGcgagtctGGtatGATGTCAGCCTCTGATACTGGAGTTCAAGAGACTCCAGTATCAGAGGCTGACAGTTTTTGct  
cgagctggcgaattcc  
>CD\_NM\_016946.3:804  
CgCctGcgagtctGGtatGCACCCTGATTCTCCTGGGAATCTTCAAGAGAGATTCACAGGAGAATCAGGGTTTTTTTGct  
cgagctggcgaattcc  
>CD\_NM\_016946.3:166  
CgCctGcgagtctGGtatGCCTTCTGAACCTGAAGTCAGAATTCAAGAGATTCCTGACTTCAGGTTTCAAGATTTTTTTGct  
cgagctggcgaattcc  
>CD\_NM\_016946.3:858  
CgCctGcgagtctGGtatGCGGCCACTTTGACAGAACAAAGTTCAAGAGACTTTGTTCTGTCAAAGTGGCCTTTTTTGct  
cgagctggcgaattcc  
>CD\_NM\_016946.3:137  
CgCctGcgagtctGGtatGACCTGGCATTGGGCAGTGTTACTTCAAGAGAGTAACACTGCCCAATGCCAGGGTTTTTGct  
cgagctggcgaattcc  
>CD\_NM\_016946.3:323  
CgCctGcgagtctGGtatGCCC GGTTGACCTTCTTGCCAACCTTCAAGAGAGTTGGCAAGAAGGTCACCCGGTTTTTTTGct  
cgagctggcgaattcc  
>CD\_NM\_016946.3:273  
CgCctGcgagtctGGtatGAACCACCAGACTCGTTTTGCTATTTCAAGAGAATAGCAAACGAGTCTGGTGGTTTTTTGct  
cgagctggcgaattcc  
>CD\_NM\_016946.3:279  
CgCctGcgagtctGGtatGAAGACTCGTTTGCTATAATAACTTCAAGAGAGTTATTATAGCAAACGAGTCTGTTTTTGct  
cgagctggcgaattcc  
>CD\_NM\_016946.3:860  
CgCctGcgagtctGGtatGACCACTTTGACAGAACAAAGAATTCAAGAGATTCCTTTGTTCTGTCAAAGTGGCCTTTTTTGct  
cgagctggcgaattcc  
>CD\_NM\_016946.3:455  
CgCctGcgagtctGGtatGCTGTGCCTCCATCCAAGCCTACTTCAAGAGAGTAGGCTTGGATGGAGGCACAATTTTTTGct  
cgagctggcgaattcc  
>CD\_NM\_016946.3:160  
CgCctGcgagtctGGtatGATGCACTCTTCTGAACCTGAAGTTCAAGAGACTTCAGGTTTCAAGAGAGTGCACTTTTTGct  
cgagctggcgaattcc  
>CD\_NM\_016946.3:702  
CgCctGcgagtctGGtatGATGTGAGGCACGGAATGGGTATTTCAAGAGAATACCATTCCGTGCCTCACAGTTTTTTGct  
cgagctggcgaattcc  
>CD\_NM\_016946.3:919  
CgCctGcgagtctGGtatGCGTGCCCGAAGTGAAGGAGAATTTCAAGAGAATTCCTTCACTTCGGGCACTTTTTTGct  
cgagctggcgaattcc  
>CD\_NM\_016946.3:562  
CgCctGcgagtctGGtatGCCCTGGTTCAAAGATGGGATAGTTCAAGAGACTATCCCATCTTTGAACCAGGTTTTTTGct  
cgagctggcgaattcc  
>CD\_NM\_016946.3:738  
CgCctGcgagtctGGtatGCTCAAATGCTGTGCGCATGGAATTCAAGAGATTCATGCGCACAGCATTTGAATTTTTGct  
cgagctggcgaattcc  
>CD\_NM\_016946.3:622  
CgCctGcgagtctGGtatGCACTCTTCTATGTCTTGAATCTTCAAGAGAGATTCAGGACATAGGAAGAGTTTTTTGct  
cgagctggcgaattcc  
>CD\_NM\_016946.3:189  
CgCctGcgagtctGGtatGCCCTGAGAATAATCCTGTGAAGTTCAAGAGACTTCACAGGATTATTCTCAGGATTTTTTGct  
cgagctggcgaattcc  
>CD\_NM\_016946.3:520

CgCctGcgagtctGGtatGATGACATGCTCAGAACAAGATGTTCAAGAGACATCTTGTTCTGAGCATGTCAGTTTTTgct  
cgagctggcgaattcc  
>CD\_NM\_016946.3:374  
CgCctGcgagtctGGtatGCAGACACTGGGACATACACTTGTTCAAGAGACAAGTGTATGTCCCAGTGTCTTTTTTgct  
cgagctggcgaattcc  
>CD\_NM\_016946.3:648  
CgCctGcgagtctGGtatGCACAGGAGAGCTGGTCTTTGATTTCAAGAGAATCAAAGACCAGCTCTCCTGTTTTTgct  
cgagctggcgaattcc  
>CD\_NM\_016946.3:339  
CgCctGcgagtctGGtatGACCAACTGGTATCACCTTCAAGTTCAAGAGACTTGAAGGTGATACCAGTTGGCTTTTTGct  
cgagctggcgaattcc  
>CD\_NM\_016946.3:461  
CgCctGcgagtctGGtatGATCCATCCAAGCCTACAGTTAATTCAAGAGATTAAGTGTAGGCTTGGATGGAGTTTTGct  
cgagctggcgaattcc  
>CD\_NM\_016946.3:243  
CgCctGcgagtctGGtatGACGTGTGGAGTGGAAAGTTGACTTCAAGAGAGTCAAACCTCCACTCCACACGGTTTTGct  
cgagctggcgaattcc  
>CD\_NM\_021219:916  
CgCctGcgagtctGGtatGCTACAGTCACTCTGGAAGTATTTTCAAGAGAAATACTTCCAGAGTACTGTATTTTTGct  
cgagctggcgaattcc  
>CD\_NM\_021219:597  
CgCctGcgagtctGGtatGATGGTCGCCCTGGGCTATCATATTTCAAGAGATATGATAGCCCAGGGCGACCATTTTTGct  
cgagctggcgaattcc  
>CD\_NM\_021219:1232  
CgCctGcgagtctGGtatGCATGCAAGTAGATGATCTCAACTTCAAGAGAGTTGAGATCATCTACTTGCATTTTTTgct  
cgagctggcgaattcc  
>CD\_NM\_021219:1189  
CgCctGcgagtctGGtatGCAGCCCGCAATTCGTGTGGATATTTCAAGAGATATCCAACAGAATTGCGGGCTTTTTTgct  
cgagctggcgaattcc  
>CD\_NM\_021219.2:916  
CgCctGcgagtctGGtatGCACAGTCACTCTGGAAGTATTATTCAAGAGATAATACTTCCAGAGTACTGTATTTTTGct  
cgagctggcgaattcc  
>CD\_NM\_021219.2:998  
CgCctGcgagtctGGtatGAAGCTACGATGTCAAGACAAAGTTCAAGAGACTTTGTCTTGACATCGTAGCTTTTTTgct  
cgagctggcgaattcc  
>CD\_NM\_021219.2:1129  
CgCctGcgagtctGGtatGCACTGGAACCTGCAATTTAATTTCAAGAGAATTAATTTGCAGAGTTCCAGTTTTTgct  
cgagctggcgaattcc  
>CD\_NM\_021219.2:744  
CgCctGcgagtctGGtatGATCGGAGTGTCTCCTTTGTCTATTCAAGAGATAGACAAAGGAGACACTCCGACTTTTTGct  
cgagctggcgaattcc  
>CD\_NM\_021219.2:799  
CgCctGcgagtctGGtatGCCGAGCTGAGATGATAGATTTCTTCAAGAGAGAAATCTATCATCTCAGCTCGATTTTTGct  
cgagctggcgaattcc  
>CD\_NM\_021219.2:1077  
CgCctGcgagtctGGtatGCTCCCAGACTTGGCTCCCAAAGTTCAAGAGACTTTGGGAGCCAAGTCTGGGATTTTTGct  
cgagctggcgaattcc  
>CD\_NM\_021219.2:1367  
CgCctGcgagtctGGtatGCAGAGTAATCTTCATCTAAAGTTCAAGAGACTTTAGATGAAGAATTACTTTTTTgct  
cgagctggcgaattcc  
>CD\_NM\_021219.2:597  
CgCctGcgagtctGGtatGCGGTGCCCCGGGCTATCATAATTTCAAGAGATTATGATAGCCCAGGGCGACCATTTTTGct  
cgagctggcgaattcc  
>CD\_NM\_021219.2:1297

CgCctGcgagtctGGtatGCTCCGTTTGTGGCCTTGGTGTATTCAAGAGATACACCAAGGCCACAAACGGAATTTTTTGct  
cgagctggcgaattcc  
>CD\_NM\_021219.2:914  
CgCctGcgagtctGGtatGAATACAGTCACTCTGGAAGTATTTCAAGAGAATACTTCCAGAGTACTGTATCTTTTTTGct  
cgagctggcgaattcc  
>CD\_NM\_021219.2:1169  
CgCctGcgagtctGGtatGCCTGGAGAATATTCCTGTGAAGTTCAAGAGACTTCCACAGGAATATTCTCCAGTTTTTTTGct  
cgagctggcgaattcc  
>CD\_NM\_021219.2:1190  
CgCctGcgagtctGGtatGACCCGCAATTCTGTTGGATATCTTCAAGAGAGATATCCAACAGAATTGCGGGCTTTTTTGct  
cgagctggcgaattcc  
>CD\_NM\_021219.2:1275  
CgCctGcgagtctGGtatGCAGTAGTTGTGGCCTTAGTGATTTCAAGAGAATCACTAAGGCCACAACACTACTATTTTTTGct  
cgagctggcgaattcc  
>CD\_NM\_021219.2:1189  
CgCctGcgagtctGGtatGCGCCCAGCAATTCTGTTGGATATTTCAAGAGAATATCCAACAGAATTGCGGGCTTTTTTGct  
cgagctggcgaattcc  
>CD\_NM\_021219.2:769  
CgCctGcgagtctGGtatGCCAACAGACTCTTCAAGGTGATTTCAAGAGAATCACCTTGAAGAGTCTGTTGATTTTTTGct  
cgagctggcgaattcc  
>CD\_NM\_021219.2:1365  
CgCctGcgagtctGGtatGCGAAGAGTAATTCCTCATCTAATTTCAAGAGATTAGATGAAGAATTACTCTTCTTTTTTGct  
cgagctggcgaattcc  
>CD\_NM\_021219.2:1025  
CgCctGcgagtctGGtatGCATCCAGCTCCTGAATACACATTTCAAGAGAATGTGTATTCAGGAGCTGGATTTTTTTTGct  
cgagctggcgaattcc  
>CD\_NM\_021219.2:1208  
CgCctGcgagtctGGtatGCATCGCAGGTGTCCTGGGAACTTCAAGAGAGTTTCCCAGGACACCTGCGATATTTTTTGct  
cgagctggcgaattcc  
>CD\_NM\_021219.2:707  
CgCctGcgagtctGGtatGCAGACTGTTTCCCTCCAGATTAGTTCAAGAGACTAATCTGGAGGAAACAGTCTTTTTTTTGct  
cgagctggcgaattcc  
>CD\_NM\_021219.2:804  
CgCctGcgagtctGGtatGATGAGATGATAGATTTCAATATTTCAAGAGAATATTGAAATCTATCATCTCAGTTTTTTTGct  
cgagctggcgaattcc  
>CD\_NM\_021219.2:571  
CgCctGcgagtctGGtatGACTCCTGCTGCTGCTGCGCTACTTCAAGAGAGTAGCGCAGCAGCAGCAGGAGTTTTTTTGct  
cgagctggcgaattcc  
>CD\_NM\_021219.2:719  
CgCctGcgagtctGGtatGCCAGATTAGAGTGAAGAACTTCAAGAGAGTTTCTTCCACTCTAATCTGGATTTTTTTTGct  
cgagctggcgaattcc  
>CD\_NM\_021219.2:996  
CgCctGcgagtctGGtatGCAGAGCTACGATGTCAAGACAATTTCAAGAGATTGTCTTGACATCGTAGCTCTATTTTTTGct  
cgagctggcgaattcc  
>CD\_NM\_021219.2:748  
CgCctGcgagtctGGtatGAAGTGTCTCCTTTGTCTACTATTTCAAGAGAATAGTAGACAAAGGAGACACTCTTTTTTGct  
cgagctggcgaattcc  
>CD\_NM\_021219.2:1135  
CgCctGcgagtctGGtatGCACTCTGCAATTTAATACTGTTTTCAAGAGAAACAGTATTAAATTGCAGAGTTTTTTTGct  
cgagctggcgaattcc  
>CD\_NM\_021219.2:1271  
CgCctGcgagtctGGtatGACCGTAGTAGTTGTGGCCTTAGTTCAAGAGACTAAGGCCACAACACTACTACGGCTTTTTTTTGct  
cgagctggcgaattcc  
>CD\_NM\_021219.2:968

CgCtGcgagtctGGtatGACCTCTTCTGCTCTGAGTGGAAATCAAGAGATCCACTCAGAGCAGAAGAGGGTTTTTGct  
cgagctggcgaattcc  
>CD\_NM\_021219.2:1098  
CgCtGcgagtctGGtatGACACCAACAGCTCATAACAATTTCAAGAGAATTGTGTATGAGCTGTTGGTGTTTTTGct  
cgagctggcgaattcc  
>CD\_NM\_021219.2:1247  
CgCtGcgagtctGGtatGATCAACATAAGTGGCATCATAGTTCAAGAGACTATGATGCCACTTATGTTGAGTTTTTGct  
cgagctggcgaattcc  
>CD\_NM\_004360:723  
CgCtGcgagtctGGtatGACCCTGTTGGTGTCTTTATTATTTCAAGAGAATAATAAAGACACCAACAGGGTTTTTGct  
cgagctggcgaattcc  
>CD\_NM\_004360:1868  
CgCtGcgagtctGGtatGATGCTGATCCTGTCTGATGTGATTCAAGAGATCACATCAGACAGGATCAGCAGTTTTTGct  
cgagctggcgaattcc  
>CD\_NM\_004360:2521  
CgCtGcgagtctGGtatGACGCCCTGCCAATCCCGATGAATCAAGAGATTCATCGGGATTGGCAGGGCGTTTTTGct  
cgagctggcgaattcc  
>CD\_NM\_004360:1710  
CgCtGcgagtctGGtatGATGCCAACTGGCTGGAGATTAATCAAGAGATTAATCTCCAGCCAGTTGGCAGTTTTTGct  
cgagctggcgaattcc  
>CD\_NM\_004360:1292  
CgCtGcgagtctGGtatGCACGTCGTAATCACCACACTGATTCAAGAGATCAGTGTGGTGATTACGACGTTTTTTTGct  
cgagctggcgaattcc  
>CD\_NM\_004360:1811  
CgCtGcgagtctGGtatGACCCTAATCATAGCTACAGACATTCAAGAGATGTCTGTAGCTATGATTAGGGCTTTTTTGct  
cgagctggcgaattcc  
>CD\_NM\_004360:1125  
CgCtGcgagtctGGtatGCCCAGAGAGATTTCCCTACGTATTCAAGAGATACGTAGGGAAACTCTCTCGGTTTTTTGct  
cgagctggcgaattcc  
>CD\_NM\_004360.2:723  
CgCtGcgagtctGGtatGACCTGTTGGTGTCTTTATTATTTTCAAGAGAAATAATAAAGACACCAACAGGGTTTTTGct  
cgagctggcgaattcc  
>CD\_NM\_004360.2:357  
CgCtGcgagtctGGtatGAACAGATGGTGTGATTACAGTCTTCAAGAGAGACTGTAATCACACCATCTGTGTTTTTGct  
cgagctggcgaattcc  
>CD\_NM\_004360.2:771  
CgCtGcgagtctGGtatGAACAGAGCCTCTGGATAGAGAATCAAGAGATCTCTATCCAGAGGCTCTGTCTTTTTTGct  
cgagctggcgaattcc  
>CD\_NM\_004360.2:2170  
CgCtGcgagtctGGtatGATCAGCGTGTGTGACTGTGAAGTTCAAGAGACTTCACAGTCACACACGCTGACTTTTTTGct  
cgagctggcgaattcc  
>CD\_NM\_004360.2:511  
CgCtGcgagtctGGtatGACCTCCGTTTCTGGAATCCAAGTTCAAGAGACTTGGATTCCAGAAACGGAGGCTTTTTTGct  
cgagctggcgaattcc  
>CD\_NM\_004360.2:801  
CgCtGcgagtctGGtatGAACATACTCTCTTCTCTCACTTCAAGAGAGTGAGAGAAGAGAGTGTATGTGTTTTTGct  
cgagctggcgaattcc  
>CD\_NM\_004360.2:2118  
CgCtGcgagtctGGtatGAAATCTCAAGCTCATGGATAACTTCAAGAGAGTTATCCATGAGCTTGAGATTGTTTTTGct  
cgagctggcgaattcc  
>CD\_NM\_004360.2:1125  
CgCtGcgagtctGGtatGACGAGAGAGTTCCCTACGTATTTCAAGAGAATACGTAGGGAAACTCTCTCGGTTTTTTGct  
cgagctggcgaattcc  
>CD\_NM\_004360.2:1542

CgCctGcgagtctGGtatGAACCGTGGATGTGCTGGATGTGTTCAAGAGACACATCCAGCACATCCACGGTGTTTTTGct  
cgagctggcgaattcc  
>CD\_NM\_004360.2:1868  
CgCctGcgagtctGGtatGCGCTGATCCTGTCTGATGTGAATTC AAGAGATTCACATCAGACAGGATCAGCATTTTTGct  
cgagctggcgaattcc  
>CD\_NM\_004360.2:1710  
CgCctGcgagtctGGtatGCGCCAACCTGGCTGGAGATTAATTTCAAGAGAATTAATCTCCAGCCAGTTGGCATTTTTTGct  
cgagctggcgaattcc  
>CD\_NM\_004360.2:816  
CgCctGcgagtctGGtatGATCTCACGCTGTGTCATCCAACCTTCAAGAGAGTTGGATGACACAGCGTGAGAGTTTTGct  
cgagctggcgaattcc  
>CD\_NM\_004360.2:2607  
CgCctGcgagtctGGtatGCTCTCTGCTCGTGTGTTGACTATTTCAAGAGAATAGTCAAACACGAGCAGAGAATTTTTGct  
cgagctggcgaattcc  
>CD\_NM\_004360.2:1870  
CgCctGcgagtctGGtatGATGATCCTGTCTGATGTGAATGTTCAAGAGACATTCACATCAGACAGGATCAGTTTTGct  
cgagctggcgaattcc  
>CD\_NM\_004360.2:1659  
CgCctGcgagtctGGtatGACCAGACACATTTATGGAACAGTTCAAGAGACTGTTCCATAAATGTGTCTGGCTTTTTGct  
cgagctggcgaattcc  
>CD\_NM\_004360.2:2457  
CgCctGcgagtctGGtatGCCGGCCTGAAGTGACTCGTAACCTTCAAGAGAGTTACGAGTCACTTCAGGCCGATTTTTGct  
cgagctggcgaattcc  
>CD\_NM\_004360.2:2367  
CgCctGcgagtctGGtatGACGGGACAACGTTTATTACTATTTCAAGAGAATAGTAATAAACGTTGTCCCGTTTTGct  
cgagctggcgaattcc  
>CD\_NM\_004360.2:1127  
CgCctGcgagtctGGtatGAAGAGAGTTTCCCTACGTATACTTCAAGAGAGTATACGTAGGGAACTCTCTTTTTGct  
cgagctggcgaattcc  
>CD\_NM\_004360.2:355  
CgCctGcgagtctGGtatGAGCACAGATGGTGTGATTACAGTTCAAGAGACTGTAATCACACCATCTGTGCCTTTTTGct  
cgagctggcgaattcc  
>CD\_NM\_004360.2:2286  
CgCctGcgagtctGGtatGCATTCTGATTCTGCTGCTCTTGTTC AAGAGACAAGAGCAGCAGAATCAGAATTTTTTTGct  
cgagctggcgaattcc  
>CD\_NM\_004360.2:1903  
CgCctGcgagtctGGtatGCTACCAGAACCTCGAACTATATTTCAAGAGAATATAGTTTCGAGGTTCTGGTATTTTTGct  
cgagctggcgaattcc  
>CD\_NM\_004360.2:1309  
CgCctGcgagtctGGtatGATGAAAGTGACTGATGCTGATGTTCAAGAGACATCAGCATCAGTCACTTTCAGTTTTGct  
cgagctggcgaattcc  
>CD\_NM\_004360.2:1214  
CgCctGcgagtctGGtatGAAGTCACTGACACCAACGATAATTCAAGAGATTATCGTTGGTGTGTCAGTGACTGTTTTGct  
cgagctggcgaattcc  
>CD\_NM\_004360.2:769  
CgCctGcgagtctGGtatGATGACAGAGCCTCTGGATAGAGTTCAAGAGACTCTATCCAGAGGCTCTGTCACTTTTTGct  
cgagctggcgaattcc  
>CD\_NM\_004360.2:990  
CgCctGcgagtctGGtatGAGACGATGATGTGAACACCTACTTCAAGAGAGTAGGTGTTACATCATCGTCCTTTTTGct  
cgagctggcgaattcc  
>CD\_NM\_004360.2:1161  
CgCctGcgagtctGGtatGCGCTGCTGACCTTCAAGGTGAGTTCAAGAGACTCACCTTGAAGGTCAGCAGCTTTTTGct  
cgagctggcgaattcc  
>CD\_NM\_001792:910

CgCctGcgagtctGGtatGAAGGGCACATGCAGTAGATATTTTCAAGAGAAATATCTACTGCATGTGCCCTCTTTTTGct  
cgagctggcgaattcc  
>CD\_NM\_001792:1388  
CgCctGcgagtctGGtatGCGGGTAGACATCATAGTAGCTATTTCAAGAGATAGCTACTATGATGTCTACCCTTTTTTgct  
cgagctggcgaattcc  
>CD\_NM\_001792:1548  
CgCctGcgagtctGGtatGCACCAATCGACTTTGAAACAAATTCAAGAGATTTGTTTCAAAGTCGATTGGTTTTTTTTGct  
cgagctggcgaattcc  
>CD\_NM\_001792:1976  
CgCctGcgagtctGGtatGATGCAGATCTATTTACTTGTATATTCAAGAGATATCAAGTAAATAGATCTGCAGTTTTTgct  
cgagctggcgaattcc  
>CD\_NM\_001792:2136  
CgCctGcgagtctGGtatGATCCAGTGACTATTAAGAGAAATTCAAGAGATTTCTCTTAATAGTCACTGGAGTTTTTgct  
cgagctggcgaattcc  
>CD\_NM\_001792:2259  
CgCctGcgagtctGGtatGAGGGTAATCCTCCCAAATCAAATTCAAGAGATTTGATTTGGGAGGATTACCCGTTTTTgct  
cgagctggcgaattcc  
>CD\_NM\_001792.2:2136  
CgCctGcgagtctGGtatGCCCAGTGACTATTAAGAGAAATTTCAAGAGAATTTCTCTTAATAGTCACTGGATTTTTGct  
cgagctggcgaattcc  
>CD\_NM\_001792.2:2763  
CgCctGcgagtctGGtatGATCCCTGTAGTGTGGACTATTTCAAGAGAATAGTCAAACACTAACAGGGAGTTTTTgct  
cgagctggcgaattcc  
>CD\_NM\_001792.2:2580  
CgCctGcgagtctGGtatGACCTGACACTGTGGAGCCTGATTTCAAGAGAATCAGGCTCCACAGTGTGAGGCTTTTTGct  
cgagctggcgaattcc  
>CD\_NM\_001792.2:1839  
CgCctGcgagtctGGtatGCATAGATCCTGTGAATGGACAATTCAAGAGATTGTCCATTCACAGGATCTATTTTTTgct  
cgagctggcgaattcc  
>CD\_NM\_001792.2:822  
CgCctGcgagtctGGtatGCACTGGTATCTTCATTATCAACTTCAAGAGAGTTGATAATGAAGATACCAGTTTTTgct  
cgagctggcgaattcc  
>CD\_NM\_001792.2:1662  
CgCctGcgagtctGGtatGCACAGTTATTGACGTAAATGAATTCAAGAGATTCATTTACGTCAATAACTGTATTTTTgct  
cgagctggcgaattcc  
>CD\_NM\_001792.2:301  
CgCctGcgagtctGGtatGCAGACTGGATTTCCCTGAAGATGTTCAAGAGACATCTTCAGGAAATCCAGTCTTTTTTgct  
cgagctggcgaattcc  
>CD\_NM\_001792.2:1152  
CgCctGcgagtctGGtatGCTCACCAACATGTTTACAATCTTCAAGAGAGATTGTAAACATGTTGGGTGAATTTTTgct  
cgagctggcgaattcc  
>CD\_NM\_001792.2:2485  
CgCctGcgagtctGGtatGAATCCAGAAGATGATGTAAGAGTTCAAGAGACTTTACATCATCTTCTGGATCTTTTTgct  
cgagctggcgaattcc  
>CD\_NM\_001792.2:956  
CgCctGcgagtctGGtatGCTGACATTGTCATCAATGTTATTTCAAGAGAATAACATTGATGACAATGTCAATTTTTgct  
cgagctggcgaattcc  
>CD\_NM\_001792.2:918  
CgCctGcgagtctGGtatGCGCAGTAGATATTAATGGAAATTTCAAGAGAATTTCCATTAATATCTACTGCATTTTTgct  
cgagctggcgaattcc  
>CD\_NM\_001792.2:743  
CgCctGcgagtctGGtatGCTGTCAGGATCAGGTCTGATAGTTCAAGAGACTATCAGACCTGATCCTGACAATTTTTgct  
cgagctggcgaattcc  
>CD\_NM\_001792.2:2767

CgCctGcgagtctGGtatGATGTTAGTGTGTTGACTATGAAGTTCAAGAGACTTCATAGTCAAACACTAACAGTTTTTGGct  
cgagctggcgaattcc  
>CD\_NM\_001792.2:1650  
CgCctGcgagtctGGtatGCACCGTGTCTGTTACAGTTATTTTCAAGAGAAATAACTGTAACAGACACGGTTTTTTTGGct  
cgagctggcgaattcc  
>CD\_NM\_001792.2:954  
CgCctGcgagtctGGtatGAATTGACATTGTCATCAATGTTTTCAAGAGAAACATTGATGACAATGTCAATGTTTTTGGct  
cgagctggcgaattcc  
>CD\_NM\_001792.2:2816  
CgCctGcgagtctGGtatGACTCCCTTAATTCCTCAAGTAGTTCAAGAGACTACTTGAGGAATTAAGGGAGCTTTTTTGGct  
cgagctggcgaattcc  
>CD\_NM\_001792.2:2905  
CgCctGcgagtctGGtatGCATGGTGGAGGTGATGACTGAATTCAAGAGATTCAGTCATCACCTCCACCATATTTTTGGct  
cgagctggcgaattcc  
>CD\_NM\_001792.2:1631  
CgCctGcgagtctGGtatGCCCCGCTCAGTCAACTGCAACTTCAAGAGAGTTGCAGTTGACTGAGGCGGGTTTTTTGGct  
cgagctggcgaattcc  
>CD\_NM\_001792.2:2259  
CgCctGcgagtctGGtatGAGGTAATCCTCCCAAATCAAATTTCAAGAGAATTTGATTTGGGAGGATTACCCTTTTTGGct  
cgagctggcgaattcc  
>CD\_NM\_001792.2:912  
CgCctGcgagtctGGtatGAGCACATGCAGTAGATATTAATTTCAAGAGAATTAATATCTACTGCATGTGCCTTTTTTGGct  
cgagctggcgaattcc  
>CD\_NM\_001792.2:380  
CgCctGcgagtctGGtatGCGTTTTAGCAACTGCAATGGAAATTTCAAGAGATTTCCATTGCAGTTGCTAAACTTTTTTGGct  
cgagctggcgaattcc  
>CD\_NM\_001792.2:2227  
CgCctGcgagtctGGtatGCTCTATGAAGTCCCATCATAATTTCAAGAGATTATGATGGGAACTTCATAGATTTTTTGGct  
cgagctggcgaattcc  
>CD\_NM\_001792.2:357  
CgCctGcgagtctGGtatGCGGACAGCCTCTTCTCAATGTGTTCAAGAGACACATTGAGAAGAGGCTGTCCTTTTTTGGct  
cgagctggcgaattcc  
>CD\_NM\_001792.2:2125  
CgCctGcgagtctGGtatGATTCCCTTTATCTCCAGTGACTATTTCAAGAGATAGTCACTGGAGATAAAGGAAGTTTTTGGct  
cgagctggcgaattcc  
>CD\_NM\_001792.2:1843  
CgCctGcgagtctGGtatGAATCCTGTGAATGGACAAATAATTTCAAGAGATTATTTGTCCATTACAGGATCTTTTTTGGct  
cgagctggcgaattcc  
>CD\_NM\_001792.2:2212  
CgCctGcgagtctGGtatGCTTCTTGAAGCTGGTATCTATGTTCAAGAGACATAGATACCAGCTTCAAGAAATTTTTGGct  
cgagctggcgaattcc  
>CD\_NM\_001792.2:1024  
CgCctGcgagtctGGtatGAGGACAGTTCCTGAGGGATCAATTTCAAGAGATTGATCCCTCAGGAACTGTCCCTTTTTTGGct  
cgagctggcgaattcc  
>CD\_NM\_002354:278  
CgCctGcgagtctGGtatGATGGCCGTAAACTGCTTTGTGATTCAAGAGATCACAAAGCAGTTTACGGCCAGTTTTTGGct  
cgagctggcgaattcc  
>CD\_NM\_002354:281  
CgCctGcgagtctGGtatGACCGTAAACTGCTTTGTGAATATTTCAAGAGATATTCACAAAGCAGTTTACGGCTTTTTTGGct  
cgagctggcgaattcc  
>CD\_NM\_002354:906  
CgCctGcgagtctGGtatGCTCCTGGTCAAACTTTAATTTATTCAAGAGATAAATTAAGTTTGACCAGGATTTTTTGGct  
cgagctggcgaattcc  
>CD\_NM\_002354:280



CgCctGcgagtctGGtatGAGCCGTAAACTGCTTTGTGAATTTCAAGAGAATTCACAAAGCAGTTTACGGCCTTTTTGct  
cgagctggcgaattcc  
>CD\_NM\_002354.279  
CgCctGcgagtctGGtatGCGGCCGTAAACTGCTTTGTGAATTTCAAGAGATTCACAAAGCAGTTTACGGCCTTTTTGct  
cgagctggcgaattcc  
>CD\_NM\_002354.1:278  
CgCctGcgagtctGGtatGCGGCCGTAAACTGCTTTGTGAATTTCAAGAGATTCACAAAGCAGTTTACGGCCTTTTTGct  
cgagctggcgaattcc  
>CD\_NM\_002354.1:1031  
CgCctGcgagtctGGtatGCGCTGGTTATTTCCAGAAAGAATTTCAAGAGATTCCTTTCTGGAAATAACCAGCCTTTTTGct  
cgagctggcgaattcc  
>CD\_NM\_002354.1:582  
CgCctGcgagtctGGtatGATCTGAGCGAGTGAGAACCTACTTCAAGAGAGTAGGTTCTCACTCGCTCAGAGTTTTGct  
cgagctggcgaattcc  
>CD\_NM\_002354.1:247  
CgCctGcgagtctGGtatGAAGGAAGAATGTGTCTGTGAAATTTCAAGAGATTTACAGACACATTTCTCCTGTTTTGct  
cgagctggcgaattcc  
>CD\_NM\_002354.1:801  
CgCctGcgagtctGGtatGAATAGCTGATGTGGCTTATTATTTCAAGAGAATAATAAGCCACATCAGCTATGTTTTGct  
cgagctggcgaattcc  
>CD\_NM\_002354.1:984  
CgCctGcgagtctGGtatGCGCTGTTATTGTGGTTGTGGTGTTC AAGAGACACCACAACCACAATAACAGCCTTTTTGct  
cgagctggcgaattcc  
>CD\_NM\_002354.1:1020  
CgCctGcgagtctGGtatGCGGAATTGTTGTGCTGGTTATTTTTCAAGAGAAATAACCAGCACAACAATTCCTTTTTGct  
cgagctggcgaattcc  
>CD\_NM\_002354.1:597  
CgCctGcgagtctGGtatGCACCTACTGGATCATCATTGAATTTCAAGAGATTC AATGATGATCCAGTAGGTTTTTTGct  
cgagctggcgaattcc  
>CD\_NM\_002354.1:590  
CgCctGcgagtctGGtatGAAGTGAGAACCTACTGGATCATTTCAAGAGAATGATCCAGTAGGTTCTCACTTTTTGct  
cgagctggcgaattcc  
>CD\_NM\_002354.1:319  
CgCctGcgagtctGGtatGCGTACTTCAGTTGGTGCACAAATTTCAAGAGATTTGTGCACCAACTGAAGTACATTTTTGct  
cgagctggcgaattcc  
>CD\_NM\_002354.1:1059  
CgCctGcgagtctGGtatGAGCAAAGTATGAGAAGGCTGAGTTCAAGAGACTCAGCCTTCTCATACTTTGCCTTTTTGct  
cgagctggcgaattcc  
>CD\_NM\_002354.1:366  
CgCctGcgagtctGGtatGCGCCAAATGTTTGGTGATGAAGTTCAAGAGACTTCATCACCAAACATTTGGCCTTTTTGct  
cgagctggcgaattcc  
>CD\_NM\_002354.1:1090  
CgCctGcgagtctGGtatGCTGGGTGAGATGCATAGGGAACCTCAAGAGAGTTCCCTATGCATCTCACCCATTTTTGct  
cgagctggcgaattcc  
>CD\_NM\_002354.1:377  
CgCctGcgagtctGGtatGCGGTGATGAAGGCAGAAATGAATTTCAAGAGATTCATTTCTGCCTTCATCACCATTTTTGct  
cgagctggcgaattcc  
>CD\_NM\_002354.1:906  
CgCctGcgagtctGGtatGCCCTGGTCAAACCTTTAATTTATTTCAAGAGAATAAATTAAGTTTGACCAGGATTTTTGct  
cgagctggcgaattcc  
>CD\_NM\_002354.1:1063  
CgCctGcgagtctGGtatGCAGTATGAGAAGGCTGAGATAATTTCAAGAGATTATCTCAGCCTTCTCATACTTTTTTTGct  
cgagctggcgaattcc  
>CD\_NM\_002354.1:485

CgCctGcgagtctGGtatGAGCTCTTTAAGGCCAAGCAGTGTTC AAGAGACACTGCTTGGCCTTAAAGAGCCTTTTTTGct  
cgagctggcgaattcc  
>CD\_NM\_002354.1:279A  
CgCctGcgagtctGGtatGAGTAAACTGCTTTGTGAATAATTTCAAGAGAATTATTCACAAAGCAGTTTACGTTTTTTGct  
cgagctggcgaattcc  
>CD\_NM\_002354.1:285  
CgCctGcgagtctGGtatGCAACTGCTTTGTGAATAATAATTTCAAGAGAATTATTATTCACAAAGCAGTTTTTTTTGct  
cgagctggcgaattcc  
>CD\_NM\_002354.1:555  
CgCctGcgagtctGGtatGCACAGACAAGGACACTGAAATATTTCAAGAGATATTTTCAGTGTCTTGTCTGTTTTTTTTGct  
cgagctggcgaattcc  
>CD\_NM\_002354.1:783  
CgCctGcgagtctGGtatGCACTCAGAAATGATGTGGACATATTTCAAGAGATATGTCCACATCATTCTGAGTTTTTTTTGct  
cgagctggcgaattcc  
>CD\_NM\_002354.1:515  
CgCctGcgagtctGGtatGACTCCACGTGCTGGTGTGTGAATTTCAAGAGATTCACACACCAGCACGTGGAGTTTTTTGct  
cgagctggcgaattcc  
>CD\_NM\_002354.1:1003  
CgCctGcgagtctGGtatGATGATAGCAGTTGTTGCTGGAATTTCAAGAGATTCAGCAACAACACTGCTATCACTTTTTTTGct  
cgagctggcgaattcc  
>CD\_NM\_002354.1:362  
CgCctGcgagtctGGtatGCGGCTGCCAAATGTTTGGTGATTTCAAGAGAATCACCAAACATTTGGCAGCCATTTTTTTGct  
cgagctggcgaattcc  
>CD\_NM\_002354.1:279B  
CgCctGcgagtctGGtatGAGCCGTAAACTGCTTTGTGAATTTCAAGAGAATTCACAAAGCAGTTTACGGCCTTTTTTTGct  
cgagctggcgaattcc  
>CD\_NM\_002354.1:973  
CgCctGcgagtctGGtatGACTGGTGTTATTGCTGTTATTGTTCAAGAGACAATAACAGCAATAACACCAGCTTTTTTTGct  
cgagctggcgaattcc  
>CD\_NM\_002354.1:461  
CgCctGcgagtctGGtatGCTGATCCTGACTGCGATGAGAGTTCAAGAGACTCTCATCGCAGTCAGGATCATTTTTTTGct  
cgagctggcgaattcc  
>CD\_NM\_002354.1:352  
CgCctGcgagtctGGtatGCGCTCAAAGCTGGCTGCCAAATTTCAAGAGAATTTGGCAGCCAGCTTTGAGCATTTTTTTGct  
cgagctggcgaattcc  
>CD\_NM\_014385:110  
CgCctGcgagtctGGtatGAAGAAGAGTAACCGGAAGGATTTTTCAAGAGAAATCCTTCCGGTTACTCTTCTGTTTTTTGct  
cgagctggcgaattcc  
>CD\_NM\_014385:876  
CgCctGcgagtctGGtatGCCTCCTTCTGTGTCATCTTCATTTCAAGAGAATGAAGATGACACAGAAGGAGATTTTTTTGct  
cgagctggcgaattcc  
>CD\_NM\_014385:730  
CgCctGcgagtctGGtatGAACCTGTGAGCTCAGAACTCTTTCAAGAGAAGAGTTCTGAGCTCGACAGGTGTTTTTTGct  
cgagctggcgaattcc  
>CD\_NM\_014385:811  
CgCctGcgagtctGGtatGAAGGCCTGTATCAGGAGTGTGTTCAAGAGACAACACTCCTGATACAGGCCTCTTTTTTTGct  
cgagctggcgaattcc  
>CD\_NM\_014385:933  
CgCctGcgagtctGGtatGAAGCAGCGGACGTGGGAGACATTTCAAGAGAATGTCTCCACGTCCGCTGCTGTTTTTTGct  
cgagctggcgaattcc  
>CD\_NM\_014385:681  
CgCctGcgagtctGGtatGCCCTCTGGTACTGGAGCTGCATTCAAGAGATGCAGCTCCAGTACCAGAGGGTTTTTTTTGct  
cgagctggcgaattcc  
>CD\_NM\_014385:303

CgCctGcgagtctGGtatGAAGCTTGGGCAGTGCAGGAGGATTCAAGAGATCCTCCTGCACTGCCCAAGCTGTTTTTGct  
cgagctggcgaattcc  
>CD\_NM\_014385:247  
CgCctGcgagtctGGtatGATGGTTCCGGGCAGGAATGATTTCAAGAGAATCATTCCTGCCCGGAACCAGTTTTTGct  
cgagctggcgaattcc  
>CD\_NM\_016543.1:675  
CgCctGcgagtctGGtatGATCAAACCTCTGGTACTGGAGTTCAAGAGACTCCAGTACCAGAGGGTTTGAGTTTTTGct  
cgagctggcgaattcc  
>CD\_NM\_016543.1:876  
CgCctGcgagtctGGtatGATCCTTCTGTGTCATCTTCATTTTTCAAGAGAAATGAAGATGACACAGAAGGAGTTTTTGct  
cgagctggcgaattcc  
>CD\_NM\_016543.1:502  
CgCctGcgagtctGGtatGCTGACTGTGACTGTCTTCCAAGTTCAAGAGACTTGGAAGACAGTCACAGTCAATTTTTGct  
cgagctggcgaattcc  
>CD\_NM\_016543.1:90  
CgCctGcgagtctGGtatGAAGGGAGAGGGTGAAGGACAGTTCAAGAGACTGTCCTTCCACCTCTCCCTTTTTTGct  
cgagctggcgaattcc  
>CD\_NM\_016543.1:225  
CgCctGcgagtctGGtatGATCTGACCCAGTTCATGGCTACTTCAAGAGAGTAGCCATGAACTGGGTCAGAGTTTTTGct  
cgagctggcgaattcc  
>CD\_NM\_016543.1:217  
CgCctGcgagtctGGtatGAAGACTGACTCTGACCCAGTTCCTTCAAGAGAGAACTGGGTGTCAGAGTCAGTCTTTTTTGct  
cgagctggcgaattcc  
>CD\_NM\_016543.1:687  
CgCctGcgagtctGGtatGAGTACTGGAGCTGCAAGTGCACCTTCAAGAGAGTGCACCTTGCAGCTCCAGTACTTTTTGct  
cgagctggcgaattcc  
>CD\_NM\_016543.1:508  
CgCctGcgagtctGGtatGATGACTGTCTTCCAAGGAGAAGTTCAAGAGACTTCTCCTTGGAAGACAGTCACTTTTTTGct  
cgagctggcgaattcc  
>CD\_NM\_016543.1:899  
CgCctGcgagtctGGtatGCAGTGAGGTCTGCAGGAAGAATTCAAGAGATTCCTCCTGCAGGACCTCACTATTTTTGct  
cgagctggcgaattcc  
>CD\_NM\_016543.1:581  
CgCctGcgagtctGGtatGACCAGTCTCTGCGCTTGGTCTGTTCAAGAGACAGACCAAGCGCAGAGACTGGCTTTTTTGct  
cgagctggcgaattcc  
>CD\_NM\_016543.1:945  
CgCctGcgagtctGGtatGAGGAGACATAGGCATGAAGGATTTCAAGAGAATCCTTCATGCCTATGTCTCCCTTTTTTGct  
cgagctggcgaattcc  
>CD\_NM\_016543.1:882  
CgCctGcgagtctGGtatGATGTGTCATCTTCATTTGTAGTGTTCAAGAGACACTACAATGAAGATGACACAGTTTTTGct  
cgagctggcgaattcc  
>CD\_NM\_016543.1:219  
CgCctGcgagtctGGtatGAACTGACTCTGACCCAGTTCATTTCAAGAGAATGAACTGGGTGTCAGAGTCAGTCTTTTTTGct  
cgagctggcgaattcc  
>CD\_NM\_016543.1:730  
CgCctGcgagtctGGtatGCCCTGTGAGCTCAGAACTCTCTTCAAGAGAGAGAGTTCTGAGCTCGACAGGTTTTTGct  
cgagctggcgaattcc  
>CD\_NM\_016543.1:768  
CgCctGcgagtctGGtatGCTCCCTGAACCTCTCCCTGCAATTCAAGAGATTGCAGGGAGAGGTTTCAGGAATTTTTGct  
cgagctggcgaattcc  
>CD\_NM\_016543.1:374  
CgCctGcgagtctGGtatGACCTGAGCATCAGAGATGCCAGTTCAAGAGACTGGCATCTCTGATGCTCAGGGTTTTTGct  
cgagctggcgaattcc  
>CD\_NM\_016543.1:231

CgCctGcgagtctGGtatGACCAGTTCATGGCTACTGGTTCTTCAAGAGAGAACCAGTAGCCATGAACTGGGTTTTTgct  
cgagctggcgaattcc  
>CD\_NM\_016543.1:642  
CgCctGcgagtctGGtatGATGGAGGAGTCTGACCCTGTACTTCAAGAGAGTACAGGGTCAGACTCCTCCAGTTTTTgct  
cgagctggcgaattcc  
>CD\_NM\_016543.1:756  
CgCctGcgagtctGGtatGCTCCCAGCACGTTCCCTGAACTTCAAGAGAGTTCAGGGAAACGTGCTGGGAATTTTTGct  
cgagctggcgaattcc  
>CD\_NM\_016543.1:105  
CgCctGcgagtctGGtatGCGGACAGAAGAGTAACCGGAAGTTCAGAGACTTCCGGTTACTCTTCTGTCCTTTTTTgct  
cgagctggcgaattcc  
>CD\_NM\_016543.1:896  
CgCctGcgagtctGGtatGCTGTAGTGAGGTCCTGCAGGAATTCAGAGATTCCTGCAGGACCTCACTACAATTTTTGct  
cgagctggcgaattcc  
>CD\_NM\_016543.1:420  
CgCctGcgagtctGGtatGATTTTCGTATGGAGAAAGGAAATTTCAAGAGAATTTCTTTCTCCATACGAAAGTTTTTgct  
cgagctggcgaattcc  
>CD\_NM\_016543.1:681  
CgCctGcgagtctGGtatGACCTCTGGTACTGGAGCTGCAATTCAGAGATTGCAGCTCCAGTACCAGAGGGTTTTTgct  
cgagctggcgaattcc  
>CD\_NM\_016543.1:579  
CgCctGcgagtctGGtatGAGGCCAGTCTCTGCGCTTGGTCTTCAAGAGAGACCAAGCGCAGAGACTGGCCTTTTTgct  
cgagctggcgaattcc  
>CD\_NM\_016543.1:204  
CgCctGcgagtctGGtatGACCAGTGGACAGCCAGACTGACTTCAAGAGAGTCAGTCTGGCTGTCCACTGGGTTTTTgct  
cgagctggcgaattcc  
>CD\_NM\_014441:106  
CgCctGcgagtctGGtatGAAGGGCGGAAGGACAGACAAGTTTTCAAGAGAACTTGTCTGTCCTTCCGCCCTTTTTTgct  
cgagctggcgaattcc  
>CD\_NM\_014441:806  
CgCctGcgagtctGGtatGAACGGCACAGTATCCACAGTCTTTCAAGAGAAGACTGTGGATACTGTGCCGTCTTTTTTgct  
cgagctggcgaattcc  
>CD\_NM\_014441:1218  
CgCctGcgagtctGGtatGCGGGAGATACGGGCATAGAGGATTCAGAGATCCTCTATGCCCGTATCTCCATTTTTTgct  
cgagctggcgaattcc  
>CD\_NM\_014441.1:471  
CgCctGcgagtctGGtatGATCTGTGAATGTGACAGCCTTGTTCAAGAGACAAGGCTGTACATTCACAGAGTTTTTgct  
cgagctggcgaattcc  
>CD\_NM\_014441.1:1047  
CgCctGcgagtctGGtatGATCTCAGCAGGTCCTACCTGAACTTCAAGAGAGTTCAGGTAGACCTGCTGAGAGTTTTTgct  
cgagctggcgaattcc  
>CD\_NM\_014441.1:1218  
CgCctGcgagtctGGtatGAGGAGATACGGGCATAGAGGATTTCAAGAGAATCCTCTATGCCCGTATCTCCCTTTTTTgct  
cgagctggcgaattcc  
>CD\_NM\_014441.1:120  
CgCctGcgagtctGGtatGAACAAGTAACTGCTGACGATGTTCAAGAGACATCGTCAGCAGTTTACTTGTCTTTTTTgct  
cgagctggcgaattcc  
>CD\_NM\_014441.1:877  
CgCctGcgagtctGGtatGATCTGTGCAGTTGATGCAGTTGTTCAAGAGACAACGTCATCAACTGCACAGACTTTTTTgct  
cgagctggcgaattcc  
>CD\_NM\_014441.1:813  
CgCctGcgagtctGGtatGCGTATCCACAGTCTTGGGAAATTTCAAGAGAATTTCCAAGACTGTGGATACTTTTTTgct  
cgagctggcgaattcc  
>CD\_NM\_014441.1:1172

CgCctGcgagtctGGtatGCAGTGAGGTCTGCAGGAAGAATTCAAGAGATTCTTCCTGCAGGACCTCACTATTTTTTGct  
cgagctggcgaattcc  
>CD\_NM\_014441.1:305  
CgCctGcgagtctGGtatGATCGGGCAGTGTGGGAGGAGACTTCAAGAGAGTCTCCTCCCACACTGCCCGAGTTTTTGct  
cgagctggcgaattcc  
>CD\_NM\_014441.1:654  
CgCctGcgagtctGGtatGAGTGCTCACCCTCATCCCACAGTTCAAGAGACTGTGGGATGAGGGTGAGCACCTTTTTTGct  
cgagctggcgaattcc  
>CD\_NM\_014441.1:1276  
CgCctGcgagtctGGtatGATGACTGAACCTTGGGCAGAAGTTCAAGAGACTTCTGCCAAGGTTTCAGTCAGTTTTTGct  
cgagctggcgaattcc  
>CD\_NM\_014441.1:806  
CgCctGcgagtctGGtatGCCGGCACAGTATCCACAGTCTTTTCAAGAGAAAGACTGTGGATACTGTGCCGTTTTTGct  
cgagctggcgaattcc  
>CD\_NM\_014441.1:1061  
CgCctGcgagtctGGtatGCCCTGAACGTCTCCCTGCAGAGTTCAAGAGACTCTGCAGGGAGACGTTTCAGTTTTTGct  
cgagctggcgaattcc  
>CD\_NM\_014441.1:1425  
CgCctGcgagtctGGtatGAACCGAGTACTCGGAGATCAAGTTCAAGAGACTTGATCTCCGAGTACTCGGTGTTTTTGct  
cgagctggcgaattcc  
>CD\_NM\_014441.1:871  
CgCctGcgagtctGGtatGAGCCTGGTCTGTGCAGTTGATGTTCAAGAGACATCAACTGCACAGACCAGGCGTTTTTGct  
cgagctggcgaattcc  
>CD\_NM\_014441.1:374  
CgCctGcgagtctGGtatGACCTGAGCATCAGAGATGCCAGTTCAAGAGACTGGCATCTCTGATGCTCAGGGTTTTTGct  
cgagctggcgaattcc  
>CD\_NM\_014441.1:479  
CgCctGcgagtctGGtatGCTGTGACAGCCTTGACCCACAGTTCAAGAGACTGTGGGTCAAGGCTGTCACATTTTTTGct  
cgagctggcgaattcc  
>CD\_NM\_014441.1:1169  
CgCctGcgagtctGGtatGCTGTAGTGAGGTCTGCAGGAATTCAAGAGATTCTTCCTGCAGGACCTCACTACAATTTTTTGct  
cgagctggcgaattcc  
>CD\_NM\_014441.1:1145  
CgCctGcgagtctGGtatGCCCTGTCTCTGCGTCATCTTTTCAAGAGAAAGATGACGCAGAAGGACAGGATTTTTTGct  
cgagctggcgaattcc  
>CD\_NM\_014441.1:885  
CgCctGcgagtctGGtatGCGTTGATGCAGTTGACAGCAATTTCAAGAGAATTGCTGTCAACTGCATCAACTTTTTTGct  
cgagctggcgaattcc  
>CD\_NM\_014441.1:214  
CgCctGcgagtctGGtatGCGGATTTACCCCTGGCCAGTAGTTCAAGAGACTACTGGGCCAGGGTAAATCCATTTTTTGct  
cgagctggcgaattcc  
>CD\_NM\_014441.1:1421  
CgCctGcgagtctGGtatGATGACACCGAGTACTCGGAGATTTCAAGAGAATCTCCGAGTACTCGGTGTCAGTTTTTGct  
cgagctggcgaattcc  
>CD\_NM\_014441.1:1065  
CgCctGcgagtctGGtatGAAACGTCTCCCTGCAGAGCAAATTTCAAGAGATTTGCTCTGCAGGGAGACGTTCTTTTTTGct  
cgagctggcgaattcc  
>CD\_NM\_014441.1:1155  
CgCctGcgagtctGGtatGATGCGTCATCTTCGTTGTAGTGTTCAAGAGACACTACAACGAAGATGACGCAGTTTTTGct  
cgagctggcgaattcc  
>CD\_NM\_014441.1:858  
CgCctGcgagtctGGtatGAGGCCAGTCTCTGCGCCTGGTCTTCAAGAGAGACCAGGCGCAGAGACTGGCCCTTTTTTGct  
cgagctggcgaattcc  
>CD\_NM\_014441.1:722

CgCctGcgagtctGGtatGAGGCCAGCGTGACCACGAACAATTCAAGAGATTGTTTCGTGGTCACGCTGGCCCTTTTTGct  
cgagctggcgaattcc  
>CD\_NM\_014441.1:99  
CgCctGcgagtctGGtatGAAGGGAGAGGGCGGAAGGACAGTTCAAGAGACTGTCTTCCGCCCTCTCCCTTTTTGct  
cgagctggcgaattcc  
>CD\_NM\_014441.1:1364  
CgCctGcgagtctGGtatGCTGCATCCCTCAGCTTCCAGATTTCAAGAGAATCTGGAAGCTGAGGGATGCATTTTTGct  
cgagctggcgaattcc  
>CD\_NM\_014441.1:1368  
CgCctGcgagtctGGtatGCTCCCTCAGCTTCCAGATGGTGTTC AAGAGACACCATCTGGAAGCTGAGGGATTTTTGct  
cgagctggcgaattcc  
>CD\_NM\_014441.1:1228  
CgCctGcgagtctGGtatGAGCATAGAGGATGCAAACGCTGTTCAAGAGACAGCGTTTGCATCCTCTATGCCTTTTTGct  
cgagctggcgaattcc  
>CD\_NM\_014441.1:781  
CgCctGcgagtctGGtatGCTGACCATGACTGTCTTCCAAGTTCAAGAGACTTGG AAGACAGTCATGGTCAATTTTTGct  
cgagctggcgaattcc  
>CD\_NM\_000604.2:769  
CgCctGcgagtctGGtatGAAGCCACACTCTGCACCGCTAGTTCAAGAGACTAGCGGTGCAGAGTGTGGCTTTTTGct  
cgagctggcgaattcc  
>CD\_NM\_000604.2:2390  
CgCctGcgagtctGGtatGCCCTTGTATGTCATCGTGGAGTTCAAGAGACTCCACGATGACATAACAAGGATTTTTGct  
cgagctggcgaattcc  
>CD\_NM\_000604.2:1145  
CgCctGcgagtctGGtatGCACAGATAACACCAAACCAAACCTTCAAGAGAGTTTGGTTTGGTGTATCTGTTTTTTTTGct  
cgagctggcgaattcc  
>CD\_NM\_000604.2:1011  
CgCctGcgagtctGGtatGCCCGCCTCTATGCTTGCCTAATTCAAGAGATTACGCAAGCATAGAGCCGGATTTTTGct  
cgagctggcgaattcc  
>CD\_NM\_000604.2:1543  
CgCctGcgagtctGGtatGCGGAGTTCATGTGTAAGGTGTATTCAAGAGATACACCTTACACATGAACTCCATTTTTGct  
cgagctggcgaattcc  
>CD\_NM\_000604.2:1235  
CgCctGcgagtctGGtatGCGCCAAGACAGTGAAGTTCAAATTTCAAGAGATTTGAACTTCACTGTCTTGGCATTTTTGct  
cgagctggcgaattcc  
>CD\_NM\_000604.2:2105  
CgCctGcgagtctGGtatGATCTGAGTATGAGCTTCCCGAATTTCAAGAGATTCGGAAGCTCATACTCAGAGTTTTGct  
cgagctggcgaattcc  
>CD\_NM\_000604.2:2705  
CgCctGcgagtctGGtatGACGACTGCCTGTGAAGTGGATGTTCAAGAGACATCCACTTACAGGCAGTCGGTTTTGct  
cgagctggcgaattcc  
>CD\_NM\_000604.2:896  
CgCctGcgagtctGGtatGACGGGACGATGTGCAGAGCATCTTCAAGAGAGATGCTCTGCACATCGTCCCGCTTTTTGct  
cgagctggcgaattcc  
>CD\_NM\_000604.2:2076  
CgCctGcgagtctGGtatGCCAGTGGGACTCCCATGCTAGTTCAAGAGACTAGCATGGGAGTCCCACTGGATTTTTGct  
cgagctggcgaattcc  
>CD\_NM\_000604.2:2621  
CgCctGcgagtctGGtatGCGAGGACAATGTGATGAAGATATTCAAGAGATATCTTCATCACATTGTCTTTTTGct  
cgagctggcgaattcc  
>CD\_NM\_000604.2:2285  
CgCctGcgagtctGGtatGCACAGAGAAAGACTTGTGACTTCAAGAGAGTCTGACAAGTCTTCTCTGTTTTTTTTGct  
cgagctggcgaattcc  
>CD\_NM\_000604.2:1903

CgCctGcgagtctGGtatGAGGTCATCGTCTACAAGATGAATTCAAGAGATTCATCTTGTAGACGATGACCGTTTTTGct  
cgagctggcgaattcc  
>CD\_NM\_000604.2:1628  
CgCctGcgagtctGGtatGACCAGACAACCTGCCTTATGTCTTCAAGAGAGACATAAGGCAGGTTGTCTGGGTTTTTGct  
cgagctggcgaattcc  
>CD\_NM\_000604.2:1095  
CgCctGcgagtctGGtatGCCCTCGGAGGATGATGATGATGTTCAAGAGACATCATCATCATCTCCGAGGATTTTTTGct  
cgagctggcgaattcc  
>CD\_NM\_000604.2:2149  
CgCctGcgagtctGGtatGAGGACAGACTGGTCTTAGGCAATTCAAGAGATTGCCTAAGACCAGTCTGTCCCTTTTTTGct  
cgagctggcgaattcc  
>CD\_NM\_000604.2:1520  
CgCctGcgagtctGGtatGCACAGTGGCCCTGGGTAGCAACTTCAAGAGAGTTGCTACCCAGGGCCACTGTTTTTTTTGct  
cgagctggcgaattcc  
>CD\_NM\_000604.2:1849  
CgCctGcgagtctGGtatGCGGAGATCATCATCTATTGCACTTCAAGAGAGTGCAATAGATGATGATCTCCATTTTTTGct  
cgagctggcgaattcc  
>CD\_NM\_000604.2:2555  
CgCctGcgagtctGGtatGAATGGAGTATCTGGCCTCCAAGTTCAAGAGACTTGGAGGCCAGATACTCCATGTTTTTGct  
cgagctggcgaattcc  
>CD\_NM\_000604.2:1667  
CgCctGcgagtctGGtatGCGGAGTTAATACCACCGACAAATTCAAGAGATTTGTTCGGTGGTATTAACCTCCATTTTTTGct  
cgagctggcgaattcc  
>CD\_NM\_000604.2:2829  
CgCctGcgagtctGGtatGACCGGTGTGCCGTGGAGGAACTTCAAGAGAGTTCCTCCACAGGCACACCGGGTTTTTGct  
cgagctggcgaattcc  
>CD\_NM\_000604.2:1637  
CgCctGcgagtctGGtatGACTGCCTTATGTCCAGATCTTGTTCAGAGACAAGATCTGGACATAAGGCAGGTTTTTGct  
cgagctggcgaattcc  
>CD\_NM\_000604.2:1324  
CgCctGcgagtctGGtatGCCACAGAAATGGAGGCTACAATTCAAGAGATTGTAGCCTCCAATTCTGTGGTTTTTTGct  
cgagctggcgaattcc  
>CD\_NM\_000604.2:2324  
CgCctGcgagtctGGtatGAATGATGAAGATGATCGGGAAGTTCAAGAGACTTCCCGATCATCTTCATCATCTTTTTTGct  
cgagctggcgaattcc  
>CD\_NM\_000604.2:1065  
CgCctGcgagtctGGtatGCTCTCCGTCAATGTTTCAGATGTTCAAGAGACATCTGAAACATTGACGGAGAATTTTTTGct  
cgagctggcgaattcc  
>CD\_NM\_000604.2:1125  
CgCctGcgagtctGGtatGCCCTCTTCAGAGGAGAAAGAAATTCAAGAGATTTCTTTCTCCTCTGAAGAGGATTTTTTGct  
cgagctggcgaattcc  
>CD\_NM\_000604.2:1358  
CgCctGcgagtctGGtatGAACCTGGAGCATCATAATGGACTTCAAGAGAGTCCATTATGATGCTCCAGGTGTTTTTGct  
cgagctggcgaattcc  
>CD\_NM\_000604.2:1409  
CgCctGcgagtctGGtatGAACCTGCATTGTGGAGAATGAGTTCAAGAGACTCATTCTCCACAATGCAGGTGTTTTTGct  
cgagctggcgaattcc  
>CD\_NM\_000604.2:1538  
CgCctGcgagtctGGtatGAAACGTGGAGTTCATGTGTAAGTTCAAGAGACTTACACATGAACTCCACGTTGTTTTTGct  
cgagctggcgaattcc  
>CD\_NM\_000604.2:2192  
CgCctGcgagtctGGtatGCGGGCAGGTGGTGTGGCAGAGTTCAAGAGACTCTGCCAACACCACCTGCCCATTTTTTGct  
cgagctggcgaattcc  
>CD\_NM\_000604.2:833

CgCtGcgagtctGGtatGACCTGTGGAAGTGGAGTCCTTCTTCAAGAGAGAAGGACTCCACTTCCACAGGGTTTTTGct  
cgagctggcgaattcc  
>CD\_NM\_000604.2:2948  
CgCtGcgagtctGGtatGATCACAGAGACCCACCTTCAAGTTCAAGAGACTTGAAGGTGGGTCTCTGTGAGTTTTTGct  
cgagctggcgaattcc  
>CD\_NM\_000604.2:2329  
CgCtGcgagtctGGtatGCGAAGATGATCGGAAGCATAATTCAAGAGATTATGCTTCCCGATCATCTTCATTTTTTGct  
cgagctggcgaattcc  
>CD\_NM\_000141:2265  
CgCtGcgagtctGGtatGAGCCTCTCTATGTCATAGTTGATTCAAGAGATCAACTATGACATAGAGAGGCCTTTTTTGct  
cgagctggcgaattcc  
>CD\_NM\_000141:1412  
CgCtGcgagtctGGtatGATAGAGTTTGTCTGCAAGGTTTTTCAAGAGAAAACCTTGCAGACAAACTCTACTTTTTTGct  
cgagctggcgaattcc  
>CD\_NM\_000141:2263  
CgCtGcgagtctGGtatGCGGGCCTCTCTATGTCATAGTTTTTCAAGAGAACTATGACATAGAGAGGCCATTTTTTGct  
cgagctggcgaattcc  
>CD\_NM\_000141:2660  
CgCtGcgagtctGGtatGAGGGTGTAAATGTGGGAGATCTTTCAAGAGAAGATCTCCACATTAACACCCCTTTTTTGct  
cgagctggcgaattcc  
>CD\_NM\_000141:1227  
CgCtGcgagtctGGtatGCGCACTGGAGCCTCATTATGGATTCAAGAGATCCATAATGAGGCTCCAGTGCTTTTTTGct  
cgagctggcgaattcc  
>CD\_NM\_000141:2215  
CgCtGcgagtctGGtatGCGGGAAACACAAGAATATCATATTTCAAGAGATATGATATTCTTGTGTTTCCATTTTTTGct  
cgagctggcgaattcc  
>CD\_NM\_022972:2215  
CgCtGcgagtctGGtatGCGGGAAACACAAGAATATCATATTTCAAGAGATATGATATTCTTGTGTTTCCATTTTTTGct  
cgagctggcgaattcc  
>CD\_NM\_022972:1279  
CgCtGcgagtctGGtatGCACCTGTGTGGTGGAGAATGAATTTCAAGAGATTCATTCTCCACCACACAGGTATTTTTGct  
cgagctggcgaattcc  
>CD\_NM\_022972:1620  
CgCtGcgagtctGGtatGCGGCGGGTAATTTCTATTGGGATTTCAAGAGAATCCAATAGAATTACCCGCCATTTTTGct  
cgagctggcgaattcc  
>CD\_NM\_022972:791  
CgCtGcgagtctGGtatGACCGCCGTGATCAGTTGGACTATTCAAGAGATAGTCCAAGTATGATCACGGCGGCTTTTTGct  
cgagctggcgaattcc  
>CD\_NM\_022972:701  
CgCtGcgagtctGGtatGAAGCCACCAACCAATACCAATTTCAAGAGATTTGGTATTTGGTTGGTGGCTTTTTTGct  
cgagctggcgaattcc  
>CD\_NM\_022972:693  
CgCtGcgagtctGGtatGCGCCAGAAGAGCCACCAACCAATTTCAAGAGATTTGGTGGTGGCTCTTCTGGCTTTTTTGct  
cgagctggcgaattcc  
>CD\_NM\_000141.2:2265  
CgCtGcgagtctGGtatGACCTCTCTATGTCATAGTTGAGTTCAAGAGACTCAACTATGACATAGAGAGGCCTTTTTGct  
cgagctggcgaattcc  
>CD\_NM\_000141.2:1412  
CgCtGcgagtctGGtatGCAGAGTTTGTCTGCAAGGTTTATTCAAGAGATAAACCTTGCAGACAAACTCTATTTTTGct  
cgagctggcgaattcc  
>CD\_NM\_000141.2:3029  
CgCtGcgagtctGGtatGAACACATAAACGGCAGTGTAAATTTCAAGAGATTAACACTGCCGTTTATGTGTGTTTTGct  
cgagctggcgaattcc  
>CD\_NM\_000141.2:2133



CgCctGcgagtctGGtatGAGCCGTGAAGATGTTGAAAGATTTCAAGAGAATCTTTCAACATCTTCACGGCCTTTTTGct  
cgagctggcgaattcc  
>CD\_NM\_000141.2:2868  
CgCctGcgagtctGGtatGCATTCTCACTCTCACAACCAATTTCAAGAGAATTGGTTGTGAGAGTGAGAATTTTTTTGct  
cgagctggcgaattcc  
>CD\_NM\_000141.2:1886  
CgCctGcgagtctGGtatGATGAGTCCAGCTCCTCCATGAATTTCAAGAGATTCATGGAGGAGCTGGACTCAGTTTTTTGct  
cgagctggcgaattcc  
>CD\_NM\_000141.2:3016  
CgCctGcgagtctGGtatGATTCTCAGTATCCACACATAAATTTCAAGAGATTATGTGTGGATACTGAGGAAGTTTTTTGct  
cgagctggcgaattcc  
>CD\_NM\_000141.2:2160  
CgCctGcgagtctGGtatGAACAGAGAAAGACCTTTCTGATTTCAAGAGAATCAGAAAGGTCTTTCTCTGTGTTTTTTGct  
cgagctggcgaattcc  
>CD\_NM\_000141.2:1772  
CgCctGcgagtctGGtatGAAGTCATCCTGTGCCGAATGAATTTCAAGAGATTCATTCGGCACAGGATGACTGTTTTTTGct  
cgagctggcgaattcc  
>CD\_NM\_000141.2:1669  
CgCctGcgagtctGGtatGATGCCAGCGCCTGGAAGAGAAATTTCAAGAGATTTCTCTTCCAGGCGCTGGCAGTTTTTTGct  
cgagctggcgaattcc  
>CD\_NM\_000141.2:2187  
CgCctGcgagtctGGtatGATCAGAGATGGAGATGATGAAGTTCAAGAGACTTCATCATCTCCATCTCTGACTTTTTTTGct  
cgagctggcgaattcc  
>CD\_NM\_000141.2:2660  
CgCctGcgagtctGGtatGAGGTGTTAATGTGGGAGATCTTTTTCAAGAGAAAGATCTCCCACATTAACACCCTTTTTTTGct  
cgagctggcgaattcc  
>CD\_NM\_000141.2:939  
CgCctGcgagtctGGtatGCACTTGGTACTTCATGGTGAATTTCAAGAGAATTCACCATGAAGTACCAAGTTTTTTTTGct  
cgagctggcgaattcc  
>CD\_NM\_000141.2:2932  
CgCctGcgagtctGGtatGACTAGTTACCTGACACAAGAATTTCAAGAGATTCCTGTGTGTCAGGGTAACTAGGTTTTTTGct  
cgagctggcgaattcc  
>CD\_NM\_000141.2:2199  
CgCctGcgagtctGGtatGAATGATGAAGATGATTGGGAAATTTCAAGAGATTTCCCAATCATCTTCATCATCTTTTTTTGct  
cgagctggcgaattcc  
>CD\_NM\_000141.2:1978  
CgCctGcgagtctGGtatGATCTCCGAGTATGAACCTCCAGTTCAAGAGACTGGAAGTTCATACTCGGAGACTTTTTTTGct  
cgagctggcgaattcc  
>CD\_NM\_000141.2:3018  
CgCctGcgagtctGGtatGCCCTCAGTATCCACACATAAACTTTCAAGAGAGTTTATGTGTGGATACTGAGGATTTTTTTGct  
cgagctggcgaattcc  
>CD\_NM\_000141.2:2253  
CgCctGcgagtctGGtatGAACACAGGATGGGCCTCTCTATTTCAAGAGAATAGAGAGGCCCATCCTGTGTGTTTTTTGct  
cgagctggcgaattcc  
>CD\_NM\_000141.2:2907  
CgCctGcgagtctGGtatGAAGCCAACCTCTCGAACAGTATTTCAAGAGAATACTGTTTCGAGAGGTTGGCTGTTTTTTGct  
cgagctggcgaattcc  
>CD\_NM\_000141.2:1568  
CgCctGcgagtctGGtatGCTCTCTATATTCGGAATGTAACCTTTCAAGAGAGTTACATTCCGAATATAGAGAATTTTTTTGct  
cgagctggcgaattcc  
>CD\_NM\_000141.2:2393  
CgCctGcgagtctGGtatGCGGACTTGGTGTGCATGCACCTATTCAAGAGATAGGTGCATGACACCAAGTCCTTTTTTTGct  
cgagctggcgaattcc  
>CD\_NM\_000141:1916

CgCtGcgagtctGGtatGAGCCTCTCTATGTCATAGTTGATTCAAGAGATCAACTATGACATAGAGAGGCCTTTTTGct  
cgagctggcgaattcc  
>CD\_NM\_000141:1060  
CgCtGcgagtctGGtatGATAGAGTTTGTCTGCAAGTTTTTCAAGAGAAAACCTTGCAGACAAACTCTACTTTTTTGct  
cgagctggcgaattcc  
>CD\_NM\_000141:1914  
CgCtGcgagtctGGtatGCGGGCCTCTCTATGTCATAGTTTTTCAAGAGAACTATGACATAGAGAGGCCATTTTTTGct  
cgagctggcgaattcc  
>CD\_NM\_000141:2311  
CgCtGcgagtctGGtatGAGGGTGTAAATGTGGGAGATCTTTCAAGAGAAGATCTCCACATTAACACCCCTTTTTTGct  
cgagctggcgaattcc  
>CD\_NM\_000141:875  
CgCtGcgagtctGGtatGCGCACTGGAGCCTCATTATGGATTCAAGAGATCCATAATGAGGCTCCAGTGCTTTTTTGct  
cgagctggcgaattcc  
>CD\_NM\_000141:1866  
CgCtGcgagtctGGtatGCGGGAACACAAGAATATCATATTCAAGAGATATGATATTCTTGTGTTCCATTTTTTGct  
cgagctggcgaattcc  
>CD\_NM\_022972:1866  
CgCtGcgagtctGGtatGCGGGAACACAAGAATATCATATTCAAGAGATATGATATTCTTGTGTTCCATTTTTTGct  
cgagctggcgaattcc  
>CD\_NM\_023030.1:1916  
CgCtGcgagtctGGtatGACCTCTCTATGTCATAGTTGAGTTCAAGAGACTCAACTATGACATAGAGAGGCCTTTTTGct  
cgagctggcgaattcc  
>CD\_NM\_023030.1:1060  
CgCtGcgagtctGGtatGCAGAGTTTGTCTGCAAGTTTTATTCAAGAGATAAACCTTGCAGACAAACTCTATTTTTTGct  
cgagctggcgaattcc  
>CD\_NM\_023030.1:2680  
CgCtGcgagtctGGtatGAACACATAAACGGCAGTGTTAATTCAAGAGATTAACACTGCCGTTTATGTGTGTTTTTGct  
cgagctggcgaattcc  
>CD\_NM\_023030.1:1784  
CgCtGcgagtctGGtatGAGCCGTGAAGATGTTGAAAGATTTCAAGAGAATCTTTCAACATCTTCACGGCCTTTTTTGct  
cgagctggcgaattcc  
>CD\_NM\_023030.1:2519  
CgCtGcgagtctGGtatGCATTCTCACTCTCACAACCAATTTCAAGAGAATTGGTTGTGAGAGTGAGAATTTTTTTGct  
cgagctggcgaattcc  
>CD\_NM\_023030.1:1537  
CgCtGcgagtctGGtatGATGAGTCCAGCTCCTCCATGAATTTCAAGAGATTCATGGAGGAGCTGGACTCAGTTTTTGct  
cgagctggcgaattcc  
>CD\_NM\_023030.1:2667  
CgCtGcgagtctGGtatGATTCTCAGTATCCACACATAAATTCAAGAGATTATGTGTGGATACTGAGGAAGTTTTTGct  
cgagctggcgaattcc  
>CD\_NM\_023030.1:1811  
CgCtGcgagtctGGtatGAACAGAGAAAGACCTTTCTGATTTCAAGAGAATCAGAAAGGTCTTTCTCTGTGTTTTTGct  
cgagctggcgaattcc  
>CD\_NM\_023030.1:1423  
CgCtGcgagtctGGtatGAAGTCATCCTGTGCCGAATGAATTTCAAGAGATTCATTCGGCACAGGATGACTGTTTTTGct  
cgagctggcgaattcc  
>CD\_NM\_023030.1:1210  
CgCtGcgagtctGGtatGCGCTGGCTCTGTTCAATGTGACTTTCAAGAGAGTACATTGAACAGAGCCAGCATTTTTTGct  
cgagctggcgaattcc  
>CD\_NM\_023030.1:1838  
CgCtGcgagtctGGtatGATCAGAGATGGAGATGATGAAGTTCAAGAGACTTCATCATCTCCATCTCTGACTTTTTTGct  
cgagctggcgaattcc  
>CD\_NM\_023030.1:2311

CgCtGcgagtctGGtatGAGGTGTTAATGTGGGAGATCTTTTCAAGAGAAAGATCTCCACATTAACACCCTTTTTGct  
cgagctggcgaattcc  
>CD\_NM\_023030.1:2583  
CgCtGcgagtctGGtatGACTAGTTACCTGACACAAGAATTC AAGAGATCTTGTGTCAGGGTAACTAGGTTTTGct  
cgagctggcgaattcc  
>CD\_NM\_023030.1:1850  
CgCtGcgagtctGGtatGAATGATGAAGATGATTGGGAAATTC AAGAGATTTCCCAATCATCTTCATCATCTTTTTGct  
cgagctggcgaattcc  
>CD\_NM\_023030.1:1629  
CgCtGcgagtctGGtatGATCTCCGAGTATGAACTTCCAGTTCAAGAGACTGGAAGTTCATACTCGGAGACTTTTTGct  
cgagctggcgaattcc  
>CD\_NM\_023030.1:2669  
CgCtGcgagtctGGtatGCCCTCAGTATCCACACATAAACTTCAAGAGAGTTTATGTGTGGATACTGAGGATTTTTGct  
cgagctggcgaattcc  
>CD\_NM\_023030.1:1904  
CgCtGcgagtctGGtatGAACACAGGATGGGCCTCTCTATTTCAAGAGAATAGAGAGGCCATCCTGTGTGTTTTTGct  
cgagctggcgaattcc  
>CD\_NM\_023030.1:2558  
CgCtGcgagtctGGtatGAAGCCAACCTCTCGAACAGTATTTCAAGAGAATACTGTTTCGAGAGGTTGGCTTTTTGct  
cgagctggcgaattcc  
>CD\_NM\_023030.1:2044  
CgCtGcgagtctGGtatGCGGACTTGGTGTGCATGCACCTATTCAAGAGATAGGTGCATGACACCAAGTCCTTTTTGct  
cgagctggcgaattcc  
>CD\_NM\_023030.1:927  
CgCtGcgagtctGGtatGCCCTGTGTAGTGGAGAATGAATTTCAAGAGAATTCATTCTCCACTACACAGGTTTTGct  
cgagctggcgaattcc  
>CD\_NM\_023030.1:2613  
CgCtGcgagtctGGtatGCCTTCAGGAGATGATTCTGTTTTTCAAGAGAAAACAGAATCATCTCCTGAAGATTTTTGct  
cgagctggcgaattcc  
>CD\_NM\_023030.1:881  
CgCtGcgagtctGGtatGAAGCCTCATTTATGGAAAGTGTGTTCAAGAGACACACTTTCATAATGAGGCTTTTTGct  
cgagctggcgaattcc  
>CD\_NM\_023030.1:1320  
CgCtGcgagtctGGtatGAAGCAAGCGCTGGAAGAGAAATTC AAGAGATTTCTCTTCCAGGCGCTTGCTTTTTGct  
cgagctggcgaattcc  
>CD\_NM\_023030.1:1778  
CgCtGcgagtctGGtatGAACCGTGGCCGTGAAGATGTTGTTCAAGAGACAACATCTTCACGGCCACGGTGTTTTTGct  
cgagctggcgaattcc  
>CD\_NM\_023030.1:2029  
CgCtGcgagtctGGtatGCGCAGATGACCTTCAAGGACTTTTTCAAGAGAAAGTCCTTGAAGGTCATCTGCTTTTTGct  
cgagctggcgaattcc  
>CD\_NM\_023030.1:851  
CgCtGcgagtctGGtatGCGGAGGCTACAAGGTACGAACTTCAAGAGAGTTTCGTACCTTGTAGCTCCATTTTTGct  
cgagctggcgaattcc  
>CD\_NM\_000142:382  
CgCtGcgagtctGGtatGAAGCGCGTACTGTGCCACTTCATTCAAGAGATGAAGTGGCACAGTACGCGCTTTTTGct  
cgagctggcgaattcc  
>CD\_NM\_000142:499  
CgCtGcgagtctGGtatGCCACGGCCCCGAGCGGATGGACATTC AAGAGATGTCCATCCGCTCGGGCCGTTTTTGct  
cgagctggcgaattcc  
>CD\_NM\_000142:2056  
CgCtGcgagtctGGtatGAACCAGAGTGACGTCTGGTCTTTTCAAGAGAAGGACCAGACGTCACTCTGGTGTTTTTGct  
cgagctggcgaattcc  
>CD\_NM\_000142.2:586

CgCtGcgagtctGGtatGATCCCTCCATCTCCTGGCTGAATTCAAGAGATTCAGCCAGGAGATGGAGGGAGTTTTTGct  
cgagctggcgaattcc  
>CD\_NM\_000142.2:1000  
CgCtGcgagtctGGtatGCAGAGTTCTCTCCTTGCACAATTCAAGAGATTGTGCAAGGAGAGAACCTCTATTTTTGct  
cgagctggcgaattcc  
>CD\_NM\_000142.2:1553  
CgCtGcgagtctGGtatGCGCCGTGAAGATGCTGAAAGACTTCAAGAGAGTCTTTCAGCATCTTCACGGCTTTTTTGct  
cgagctggcgaattcc  
>CD\_NM\_000142.2:382  
CgCtGcgagtctGGtatGCGCGCTACTGTGCCACTTCAAGAGACTGAAGTGGCACAGTACGCGCTTTTTTGct  
cgagctggcgaattcc  
>CD\_NM\_000142.2:1607  
CgCtGcgagtctGGtatGATCTGAGATGGAGATGATGAAGTTCAAGAGACTTCATCATCTCCATCTCAGACTTTTTGct  
cgagctggcgaattcc  
>CD\_NM\_000142.2:2195  
CgCtGcgagtctGGtatGAACACACGACCTGTACATGATCTTCAAGAGAGATCATGTACAGGTCGTGTGTTTTTGct  
cgagctggcgaattcc  
>CD\_NM\_000142.2:850  
CgCtGcgagtctGGtatGCGGAGTTCCACTGCAAGGTGTATTCAAGAGATACACCTTGCAGTGGAATCCATTTTTGct  
cgagctggcgaattcc  
>CD\_NM\_000142.2:1961  
CgCtGcgagtctGGtatGAGTGCACAACCTCGACTACTTCAAGAGAGTAGTAGTCGAGGTTGTGCACGTTTTTGct  
cgagctggcgaattcc  
>CD\_NM\_000142.2:503  
CgCtGcgagtctGGtatGACCCGAGCGGATGGACAAGAAGTTCAAGAGACTTCTTGTCCATCCGCTCGGGCTTTTTGct  
cgagctggcgaattcc  
>CD\_NM\_000142.2:2144  
CgCtGcgagtctGGtatGACTCTTCAAGCTGCTGAAGGAGTTCAAGAGACTCCTTCAGCAGCTTGAAGAGCTTTTTGct  
cgagctggcgaattcc  
>CD\_NM\_000142.2:2132  
CgCtGcgagtctGGtatGACCTGTGGAGGAGCTTCAAGTTCAAGAGACTTGAAGAGCTCCTCCACAGGGTTTTGct  
cgagctggcgaattcc  
>CD\_NM\_000142.2:1619  
CgCtGcgagtctGGtatGAATGATGAAGATGATCGGGAAATTCAGAGATTTCCCGATCATCTTCATCATTTTTGct  
cgagctggcgaattcc  
>CD\_NM\_000142.2:1487  
CgCtGcgagtctGGtatGAGGCCAGGTGGTCATGGCGGAGTTCAAGAGACTCCGCCATGACCACCTGGCCGTTTTTGct  
cgagctggcgaattcc  
>CD\_NM\_000142.2:937  
CgCtGcgagtctGGtatGAGGACGGCACACCCTACGTTACTTCAAGAGAGTAACGTAGGGTGTGCCGTCGTTTTTGct  
cgagctggcgaattcc  
>CD\_NM\_000142.2:1321  
CgCtGcgagtctGGtatGCCGCTCCATGAGCTCCAACACTTCAAGAGAGTGTGGAGCTCATGGACGCGTTTTTGct  
cgagctggcgaattcc  
>CD\_NM\_000142.2:1013  
CgCtGcgagtctGGtatGATTGCACAACGTCACCTTTGAGTTCAAGAGACTCAAAGGTGACGTTGTGCAAGTTTTGct  
cgagctggcgaattcc  
>CD\_NM\_000142.2:1504  
CgCtGcgagtctGGtatGAGGAGCCATCGGCATTGACAATTCAAGAGATTGTCAATGCCGATGGCCTCCGTTTTTGct  
cgagctggcgaattcc  
>CD\_NM\_000142.2:1580  
CgCtGcgagtctGGtatGAACTGACAAGGACCTGTGCGACTTCAAGAGAGTCCGACAGGTCCTTGTGTCAGTTTTTGct  
cgagctggcgaattcc  
>CD\_NM\_000142.2:1312

CgCtGcgagtctGGtatGCGGAGTCCAACGCGTCCATGAGTTCAAGAGACTCATGGACGCGTTGGACTCCATTTTTGct  
cgagctggcgaattcc  
>CD\_NM\_000142.2:2036  
CgCtGcgagtctGGtatGATTTGACCGAGTCTACACTCACTTCAAGAGAGTGTAGACTCGGTCAAACTTTTGct  
cgagctggcgaattcc  
>CD\_NM\_000142.2:1916  
CgCtGcgagtctGGtatGAGAGGACAACGTGATGAAGATCTTCAAGAGAGATCTTCATCACGTTGTCCCTCGTTTTGct  
cgagctggcgaattcc  
>CD\_NM\_000142.2:644  
CgCtGcgagtctGGtatGCGGCATCAAGCTGCGGCATCAGTTCAAGAGACTGATGCCGCAGCTTGATGCCTTTTTGct  
cgagctggcgaattcc  
>CD\_NM\_000142.2:2327  
CgCtGcgagtctGGtatGATCGGCGCTTTCGAGCAGTACTTCAAGAGAGTACTGCTCGAAAGGCGCCGACTTTTTGct  
cgagctggcgaattcc  
>CD\_NM\_000142.2:249  
CgCtGcgagtctGGtatGACCACTGTCTGGGTCAAGGATGTTCAAGAGACATCCTTGACCCAGACAGTGGTTTTGct  
cgagctggcgaattcc  
>CD\_NM\_000142.2:1913  
CgCtGcgagtctGGtatGAACCGAGGACAACGTGATGAAGTTCAAGAGACTTCATCACGTTGTCCCTCGTCTTTTTGct  
cgagctggcgaattcc  
>CD\_NM\_000142.2:1813  
CgCtGcgagtctGGtatGCGGACCTGGTGTCTGTGCCTATTCAAGAGATAGGCACAGGACACCAGGTCCTTTTTGct  
cgagctggcgaattcc  
>CD\_NM\_000142.2:500  
CgCtGcgagtctGGtatGCCGGCCCCGAGCGGATGGACAAGTTCAAGAGACTTGTCCATCCGCTCGGGCCGTTTTGct  
cgagctggcgaattcc  
>CD\_NM\_000142.2:899  
CgCtGcgagtctGGtatGACTCAAGCACGTGGAGGTGAACTTCAAGAGAGTTCACCTCCACGTGCTTGAGCTTTTTGct  
cgagctggcgaattcc  
>CD\_NM\_000142.2:2279  
CgCtGcgagtctGGtatGACTGGACCGTGTCTTACCGTGTTCAGAGACACGGTAAGGACACGGTCCAGTTTTGct  
cgagctggcgaattcc  
>CD\_NM\_000142.2:1112  
CgCtGcgagtctGGtatGCGCCGAGGAGGAGCTGGTGGAGTTCAAGAGACTCCACCAGCTCCTCCTCGGTTTTGct  
cgagctggcgaattcc  
>CD\_NM\_002011:702  
CgCtGcgagtctGGtatGCCGCCCACCATCCGCTGGCTTATTCAAGAGATAAGCCAGCGGATGGTGGGCGTTTTGct  
cgagctggcgaattcc  
>CD\_NM\_002011:850  
CgCtGcgagtctGGtatGCCGCTGTGGGCAGCATCCGCTATTCAAGAGATAGCGGATGCTGCCACAGCGTTTTGct  
cgagctggcgaattcc  
>CD\_NM\_002011:855  
CgCtGcgagtctGGtatGATGGGCAGCATCCGCTATAACTTTCAAGAGAAGTTATAGCGGATGCTGCCACTTTTTGct  
cgagctggcgaattcc  
>CD\_NM\_002011:2406  
CgCtGcgagtctGGtatGATGCTGGCCGTCTCTGAGGAGTTTCAAGAGAACCTCAGAGACGGCCAGCAGTTTTGct  
cgagctggcgaattcc  
>CD\_NM\_002011:2437  
CgCtGcgagtctGGtatGCCGCTGACCTTCGACCTTATTCAAGAGATAGGGTCCGAAGGTCAGGCGGATTTTTGct  
cgagctggcgaattcc  
>CD\_NM\_002011:2079  
CgCtGcgagtctGGtatGAACCACATTGACTACTATAAGATTCAAGAGATCTTATAGTAGTCAATGTGGTGTTTTTGct  
cgagctggcgaattcc  
>CD\_NM\_002011.3:1666

CgCctGcgagtctGGtatGAGCCGTCAAGATGCTCAAAGACTTCAAGAGAGTCTTTGAGCATCTTGACGGCCTTTTTGct  
cgagctggcgaattcc  
>CD\_NM\_002011.3:702  
CgCctGcgagtctGGtatGAGCCCACCATCCGCTGGCTTAATTC AAGAGATTAAGCCAGCGGATGGTGGGCGTTTTTGct  
cgagctggcgaattcc  
>CD\_NM\_002011.3:2497  
CgCctGcgagtctGGtatGAAGCGATTCTGTCTTCAGCCACTTCAAGAGAGTGGCTGAAGACAGAATCGCTGTTTTTGct  
cgagctggcgaattcc  
>CD\_NM\_002011.3:2079  
CgCctGcgagtctGGtatGCCACATTGACTACTATAAGAATTCAAGAGATTCTTATAGTAGTCAATGTGGTTTTTTGct  
cgagctggcgaattcc  
>CD\_NM\_002011.3:238  
CgCctGcgagtctGGtatGATCTGAGGAAGTGGAGCTTGAGTTCAAGAGACTCAAGCTCCACTTCCTCAGAGTTTTTGct  
cgagctggcgaattcc  
>CD\_NM\_002011.3:495  
CgCctGcgagtctGGtatGCGCAGAATCTCACCTTGATTACTTCAAGAGAGTAATCAAGGTGAGATTCTGCATTTTTGct  
cgagctggcgaattcc  
>CD\_NM\_002011.3:1204  
CgCctGcgagtctGGtatGATGGCTCACGGTGCTGCCAGAGTTCAAGAGACTCTGGCAGCACCGTGAGCCAGTTTTTGct  
cgagctggcgaattcc  
>CD\_NM\_002011.3:1750  
CgCctGcgagtctGGtatGACGACACAAGAACATCATCAACTTCAAGAGAGTTGATGATGTTCTTGTGTCGGTTTTTGct  
cgagctggcgaattcc  
>CD\_NM\_002011.3:481  
CgCctGcgagtctGGtatGATCCATGATCGTCCTGCAGAATTTCAAGAGAATTCTGCAGGACGATCATGGAGTTTTTGct  
cgagctggcgaattcc  
>CD\_NM\_002011.3:2113  
CgCctGcgagtctGGtatGACGCCTGCCTGTGAAGTGGATGTTCAAGAGACATCCACTTCACAGGCAGGCGTTTTTGct  
cgagctggcgaattcc  
>CD\_NM\_002011.3:2029  
CgCctGcgagtctGGtatGCGAGGACAATGTGATGAAGATTTTCAAGAGAAATCTTCATCACATTGTCCTCATTTTTGct  
cgagctggcgaattcc  
>CD\_NM\_002011.3:1425  
CgCctGcgagtctGGtatGCGGAGTCAGGCTCTTCCGGCAATTC AAGAGATTGCCGGAAGAGCCTGACTCCATTTTTGct  
cgagctggcgaattcc  
>CD\_NM\_002011.3:966  
CgCctGcgagtctGGtatGCGGAGCTGCTGTGCAAGGTGTATTCAAGAGATACACCTTGACAGCAGCTCCATTTTTGct  
cgagctggcgaattcc  
>CD\_NM\_002011.3:1669  
CgCctGcgagtctGGtatGAGTCAAGATGCTCAAAGACA ACTTCAAGAGAGTGTCTTTGAGCATCTTGACGTTTTTGct  
cgagctggcgaattcc  
>CD\_NM\_002011.3:2071  
CgCctGcgagtctGGtatGAGGCGTCCACCACATTGACTACTTCAAGAGAGTAGTCAATGTGGTGGACGCCGTTTTTGct  
cgagctggcgaattcc  
>CD\_NM\_002011.3:493  
CgCctGcgagtctGGtatGACTGCAGAATCTCACCTTGATTTTCAAGAGAAATCAAGGTGAGATTCTGCAGTTTTTGct  
cgagctggcgaattcc  
>CD\_NM\_002011.3:427  
CgCctGcgagtctGGtatGAATTGCCAGCTTCCTACCTGAGTTCAAGAGACTCAGGTAGGAAGCTGGCAATTTTTTGct  
cgagctggcgaattcc  
>CD\_NM\_002011.3:855  
CgCctGcgagtctGGtatGCGGGCAGCATCCGCTATAACTATTCAAGAGATAGTTATAGCGGATGCTGCCCATTTTTGct  
cgagctggcgaattcc  
>CD\_NM\_002011.3:1508

CgCctGcgagtctGGtatGAGCCTCGTGAGTCTAGATCTACTTCAAGAGAGTAGATCTAGACTCACGAGGCCTTTTTGct  
cgagctggcgaattcc  
>CD\_NM\_002011.3:1815  
CgCctGcgagtctGGtatGCGGAGTGCGCCGCAAGGGAAATTC AAGAGATTTCCCTTGGCGGGCGACTCCATTTTTTGct  
cgagctggcgaattcc  
>CD\_NM\_002011.3:1372  
CgCctGcgagtctGGtatGACCCGCCACTGTGCAGAAGCTCTTCAAGAGAGAGCTTCTGCACAGTGGCGGGCTTTTTTGct  
cgagctggcgaattcc  
>CD\_NM\_002011.3:2011  
CgCctGcgagtctGGtatGACGCAATGTGCTGGTGACTGAGTTCAAGAGACTCAGTCACCAGCACATTGCGGTTTTTGct  
cgagctggcgaattcc  
>CD\_NM\_002011.3:1693  
CgCctGcgagtctGGtatGATCTGACAAGGACCTGGCCGACTTCAAGAGAGTCGGCCAGGTCTTGTGTCAGAGTTTTTGct  
cgagctggcgaattcc  
>CD\_NM\_002011.3:1720  
CgCctGcgagtctGGtatGATCGGAGATGGAGGTGATGAAGTTCAAGAGACTTCATCACCTCCATCTCCGAGTTTTTGct  
cgagctggcgaattcc  
>CD\_NM\_002011.3:1006  
CgCctGcgagtctGGtatGAATCCAGTGGCTGAAGCACATCTTCAAGAGAGATGTGCTTCCAGCCACTGGATGTTTTTGct  
cgagctggcgaattcc  
>CD\_NM\_002011.3:961  
CgCctGcgagtctGGtatGAGACGTGGAGCTGCTGTGCAAGTTCAAGAGACTTGCACAGCAGCTCCACGTCGTTTTTGct  
cgagctggcgaattcc  
>CD\_NM\_002011.3:1762  
CgCctGcgagtctGGtatGAATCATCAACCTGCTTGGTGTCTTCAAGAGAGACACCAAGCAGGTTGATGATGTTTTTGct  
cgagctggcgaattcc  
>CD\_NM\_004829:446  
CgCctGcgagtctGGtatGAGGGAGAGAAGGTGACCTTCTATTCAAGAGATAGAAGGTCACCTTCTCTCCCGTTTTTGct  
cgagctggcgaattcc  
>CD\_NM\_004829:708  
CgCctGcgagtctGGtatGACCCACCTTTCCTGCAGACACTTTC AAGAGAAGTGTCTGCAGGAAAGGTGGGGTTTTTGct  
cgagctggcgaattcc  
>CD\_NM\_004829:376  
CgCctGcgagtctGGtatGATGGATCTGGTGGTAACAGAAATTC AAGAGATTTCTGTTACCACCAGATCCAGTTTTTGct  
cgagctggcgaattcc  
>CD\_NM\_004829:174  
CgCctGcgagtctGGtatGAACCATCTGTTGCCAGGGAAATTTCAAGAGAATTTCCCTGGCAACAGATGGTCTTTTTTGct  
cgagctggcgaattcc  
>CD\_NM\_004829.3:794  
CgCctGcgagtctGGtatGCGCCAGAAATCTCCTTCGGATGTTCAAGAGACATCCGAAGGAGATTCTGGGCATTTTTTGct  
cgagctggcgaattcc  
>CD\_NM\_004829.3:446  
CgCctGcgagtctGGtatGAGGAGAGAAGGTGACCTTCTACTTCAAGAGAGTAGAAGGTCACCTTCTCTCCCTTTTTTGct  
cgagctggcgaattcc  
>CD\_NM\_004829.3:842  
CgCctGcgagtctGGtatGCCTAGTGTGGTTCCTGGTTGAATTC AAGAGATTC AACCAGGAACCACACTAGATTTTTTGct  
cgagctggcgaattcc  
>CD\_NM\_004829.3:374  
CgCctGcgagtctGGtatGACTGGATCTGGTGGTAACAGAATTC AAGAGATTC TGTACCACCAGATCCAGTTTTTGct  
cgagctggcgaattcc  
>CD\_NM\_004829.3:211  
CgCctGcgagtctGGtatGCCAGCTGCACTTTGAAGGAAGTTCAAGAGACTTCCTTCAAAGTGCAGCTGGTTTTTGct  
cgagctggcgaattcc  
>CD\_NM\_004829.3:173

CgCtGcgagtctGGtatGAACCATCTGTTGCCAGGGAAATTTCAAGAGAATTTCCCTGGCAACAGATGGTCTTTTTGct  
cgagctggcgaattcc  
>CD\_NM\_004829.3:862  
CgCtGcgagtctGGtatGCAGACTGGCTCAGCAGGAAGAGTTCAAGAGACTTTCCTGCTGAGCCAGTCTTTTTTTGct  
cgagctggcgaattcc  
>CD\_NM\_004829.3:404  
CgCtGcgagtctGGtatGAACACCCACCTCTCGGTTTCATTTCAAGAGAATGAACCGAGAGGGTGGGTGTGTTTTGct  
cgagctggcgaattcc  
>CD\_NM\_004829.3:433  
CgCtGcgagtctGGtatGACGAAGTGATCTCGGGAGAGAATTTCAAGAGATTCTCTCCCGAGATCACTTCGGTTTTGct  
cgagctggcgaattcc  
>CD\_NM\_004829.3:708  
CgCtGcgagtctGGtatGACCACCTTTCCTGCAGACACTTTTTCAAGAGAAAGTGTCTGCAGGAAAGTGGGTTTTTGct  
cgagctggcgaattcc  
>CD\_NM\_004829.3:900  
CgCtGcgagtctGGtatGCGCAGAGCTTCCACTTGGGAAGTTCAAGAGACTTCCCAAGTGAAGCTCTGCTTTTTGct  
cgagctggcgaattcc  
>CD\_NM\_004829.3:586  
CgCtGcgagtctGGtatGACCACCGAGGGACATACCGATGTTCAAGAGACATCGGTATGTCCCTCGGTGGTTTTGct  
cgagctggcgaattcc  
>CD\_NM\_004829.3:73  
CgCtGcgagtctGGtatGAGCTGTGCTGAGTCAGAGGATTTCAAGAGAATCCTCTGACTCAGACACAGCCTTTTTGct  
cgagctggcgaattcc  
>CD\_NM\_004829.3:174  
CgCtGcgagtctGGtatGCTCTGTTGCCAGGGAAATTTATGTTCAAGAGACATAATTTCCCTGGCAACAGATTTTTGct  
cgagctggcgaattcc  
>CD\_NM\_004829.3:860  
CgCtGcgagtctGGtatGCGAAGACTGGCTCAGCAGGAAGTTCAAGAGACTTTCCTGCTGAGCCAGTCTTCATTTTTGct  
cgagctggcgaattcc  
>CD\_NM\_004829.3:376  
CgCtGcgagtctGGtatGCGGATCTGGTGGTAACAGAAATTTCAAGAGAATTTCTGTTACCACCAGATCCATTTTTGct  
cgagctggcgaattcc  
>CD\_NM\_004829.3:772  
CgCtGcgagtctGGtatGCCATGCCCTCTGGGATCACACTTCAAGAGAGTGTGATCCCAGAGGGCATGGTTTTTTGct  
cgagctggcgaattcc  
>CD\_NM\_004829.3:644  
CgCtGcgagtctGGtatGAAGTGAGCCAGTGAAGCTCCTGTTCAAGAGACAGGAGCTTCACTGGCTCACTGTTTTGct  
cgagctggcgaattcc  
>CD\_NM\_004829.3:83  
CgCtGcgagtctGGtatGAAGTCAGAGGATCAGCGCCAGTTCAAGAGACTGGGCGCTGATCCTCTGACTCTTTTTGct  
cgagctggcgaattcc  
>CD\_NM\_004829.3:749  
CgCtGcgagtctGGtatGAACAGAGACGGGACTCCAGAAATTTCAAGAGATTTCTGGAGTCCCGTCTCTGTGTTTTGct  
cgagctggcgaattcc  
>CD\_NM\_004829.3:650  
CgCtGcgagtctGGtatGACCAGTGAAGCTCCTGGTCACATTCAAGAGATGTGACCAGGAGCTTCACTGGCTTTTTGct  
cgagctggcgaattcc  
>CD\_NM\_004829.3:417  
CgCtGcgagtctGGtatGCCGGTTCATCCTGGACCCGAAGTTCAAGAGACTTCCGGTCCAGGATGAACCGATTTTTGct  
cgagctggcgaattcc  
>CD\_NM\_004829.3:491  
CgCtGcgagtctGGtatGAATGTTCTTACTGCTCAAGGAGTTCAAGAGACTCCTTGAGCAGTAAGAACATGTTTTGct  
cgagctggcgaattcc  
>CD\_NM\_004829.3:783



CgCtGcgagtctGGtatGCGGGATCACACTGCCAGAATCTTCAAGAGAGATTCTGGGCAGTGTGATCCATTTTTGct  
cgagctggcgaattcc  
>CD\_NM\_004829.3:346  
CgCtGcgagtctGGtatGAGGAGCTCTGGTCAGAGCCCAGTTCAAGAGACTGGGCTCTGACCAGAGCTCCTTTTGct  
cgagctggcgaattcc  
>CD\_NM\_004829.3:362  
CgCtGcgagtctGGtatGACCCAGCAACTTGCTGGATCTGTTCAAGAGACAGATCCAGCAAGTTGCTGGGCTTTTTGct  
cgagctggcgaattcc  
>CD\_NM\_004829.3:408  
CgCtGcgagtctGGtatGACCACCTCTCGGTTTCATCTGTTCAAGAGACAGGATGAACCGAGAGGGTGGGTTTTGct  
cgagctggcgaattcc  
>CD\_NM\_004829.3:260  
CgCtGcgagtctGGtatGACCTGAGCGGATTAACAAAGTCTTCAAGAGAGACTTTGTTAATCCGCTCAGGGTTTTGct  
cgagctggcgaattcc  
>CD\_NM\_004829.3:411  
CgCtGcgagtctGGtatGCCCTCTCGGTTTCATCTGGACTTCAAGAGAGTCCAGGATGAACCGAGAGGGTTTTGct  
cgagctggcgaattcc  
>CD\_NM\_004828:399  
CgCtGcgagtctGGtatGAAGGACATTACTGGTGTAGAATTTCAAGAGAATTCTACACCAGTAATGTCTTTTTGct  
cgagctggcgaattcc  
>CD\_NM\_004828:440  
CgCtGcgagtctGGtatGCCTGTCTCTAAGTCCGTCAGATTTCAAGAGAATCTGACGGACTTAGAGACAGATTTTTGct  
cgagctggcgaattcc  
>CD\_NM\_004828:763  
CgCtGcgagtctGGtatGACTCAGGAGCCTGGATACCCAATTTCAAGAGATTGGGTATCCAGGCTCCTGAGCTTTTTGct  
cgagctggcgaattcc  
>CD\_NM\_004828:221  
CgCtGcgagtctGGtatGCCGGGCAGTCTCTACGAGAAGATTTCAAGAGATCTTCTCGTAGAGACTGCCGTTTTGct  
cgagctggcgaattcc  
>CD\_NM\_004828:423  
CgCtGcgagtctGGtatGCCCGCCCTCTGACAACCTCTGTTTCAAGAGAACAGAGTTGTGAGAAGGGCGTTTTGct  
cgagctggcgaattcc  
>CD\_NM\_004828:513  
CgCtGcgagtctGGtatGACCGCGACCTGGTCTCTTACATTTCAAGAGATGTGAAGAGACCAGGTCGCGGTTTTGct  
cgagctggcgaattcc  
>CD\_NM\_004828:257  
CgCtGcgagtctGGtatGAAGGCTTCAGCACTTGTGTGCATTTCAAGAGATGCACACAAGTGCTGAAGCCTTTTTGct  
cgagctggcgaattcc  
>CD\_NM\_004828.2:515  
CgCtGcgagtctGGtatGACGACCTGGTCTCTTACAGACTTCAAGAGAGTCTGTGAAGAGACCAGGTCGTTTTGct  
cgagctggcgaattcc  
>CD\_NM\_004828.2:454  
CgCtGcgagtctGGtatGATCAGATTCTATCTGGTGGTATTTCAAGAGAATACCACCAGATAGAATCTGACTTTTTGct  
cgagctggcgaattcc  
>CD\_NM\_004828.2:223  
CgCtGcgagtctGGtatGAGCAGTCTCTACGAGAAGAAAGTTCAAGAGACTTCTTCTCGTAGAGACTGCTTTTGct  
cgagctggcgaattcc  
>CD\_NM\_004828.2:133  
CgCtGcgagtctGGtatGCTCCCAGGCTCTCAGGCACAATTTCAAGAGAATTGTGCCTGAGAGCCTGGGAATTTTTGct  
cgagctggcgaattcc  
>CD\_NM\_004828.2:219  
CgCtGcgagtctGGtatGAACGGGCAGTCTCTACGAGAAGTTCAAGAGACTTCTCGTAGAGACTGCCGTTTTGct  
cgagctggcgaattcc  
>CD\_NM\_004828.2:269

CgCtGcgagtctGGtatGCTGTGTGCATCAGGTTAGTCACTTCAAGAGAGTGACTAACCTGATGCACACAATTTTTGct  
cgagctggcgaattcc  
>CD\_NM\_004828.2:284  
CgCtGcgagtctGGtatGCAGTCACCAGCTCCAAGCCCAGTTCAAGAGACTGGGCTTGGAGCTGGTACTATTTTTGct  
cgagctggcgaattcc  
>CD\_NM\_004828.2:444  
CgCtGcgagtctGGtatGATCTAAGTCCGTCAGATTCTATTTCAAGAGAATAGAATCTGACGGACTTAGAGTTTTTGct  
cgagctggcgaattcc  
>CD\_NM\_004828.2:479  
CgCtGcgagtctGGtatGAAGCCTCTGCCTCCACACAGACTTCAAGAGAGTCTGTGTGGAGGCAGAGGCTGTTTTTGct  
cgagctggcgaattcc  
>CD\_NM\_004828.2:863  
CgCtGcgagtctGGtatGCTCACACTGTTGCAAGGACTAATTCAAGAGATTAGTCCTTGCAACAGTGTGATTTTTTGct  
cgagctggcgaattcc  
>CD\_NM\_004828.2:367  
CgCtGcgagtctGGtatGATCACCATGACTGATCTGAGAGTTCAAGAGACTCTCAGATCAGTCATGGTACTTTTTGct  
cgagctggcgaattcc  
>CD\_NM\_004828.2:440  
CgCtGcgagtctGGtatGATGTCTCTAAGTCCGTCAGATTTTTCAAGAGAAATCTGACGGACTTAGAGACAGTTTTTGct  
cgagctggcgaattcc  
>CD\_NM\_004828.2:547  
CgCtGcgagtctGGtatGCGTGTGTGCCCTCCACTGCAGTTCAAGAGACTGCAGTGGGAGGCACACAGCTTTTTTGct  
cgagctggcgaattcc  
>CD\_NM\_004828.2:832  
CgCtGcgagtctGGtatGATTTCCCTCACCTGTAGAGAGAGTTCAAGAGACTCTCTCTACAGGTGAGGAAACTTTTTGct  
cgagctggcgaattcc  
>CD\_NM\_004828.2:429  
CgCtGcgagtctGGtatGCTCTGACAACTCTGTCTCTAAGTTCAAGAGACTTAGAGACAGAGTTGTCAGAATTTTTGct  
cgagctggcgaattcc  
>CD\_NM\_004828.2:475  
CgCtGcgagtctGGtatGCCTCCAGCCTCTGCCTCCACACTTCAAGAGAGTGTGGAGGCAGAGGCTGGAGATTTTTGct  
cgagctggcgaattcc  
>CD\_NM\_004828.2:826  
CgCtGcgagtctGGtatGCCCTCAGTTTCCCTCACCTGTAGTTCAAGAGACTACAGGTGAGGAACTGAGTTTTTTGct  
cgagctggcgaattcc  
>CD\_NM\_004828.2:597  
CgCtGcgagtctGGtatGCACCATCCCTGTCCCTTACAGTTCAAGAGACTGTGAAGGGACAGGGATGGTATTTTTGct  
cgagctggcgaattcc  
>CD\_NM\_004828.2:153  
CgCtGcgagtctGGtatGCTCCAAGGCTCAGGTACTTCAAATTCAAGAGATTGAAGTACCTGAGCCTTGGATTTTTTGct  
cgagctggcgaattcc  
>CD\_NM\_004828.2:159  
CgCtGcgagtctGGtatGAGCTCAGGTACTTCAAAGTGTGTTCAAGAGACACACTTTGAAGTACCTGAGCCTTTTTGct  
cgagctggcgaattcc  
>CD\_NM\_004828.2:365  
CgCtGcgagtctGGtatGATGTCACCATGACTGATCTGAGTTCAAGAGACTCAGATCAGTCATGGTACTTTTTGct  
cgagctggcgaattcc  
>CD\_NM\_004828.2:601  
CgCtGcgagtctGGtatGCTCCCTGTCCCTTACAGCCACTTCAAGAGAGTGGCTGTGAAGGGACAGGGATTTTTTGct  
cgagctggcgaattcc  
>CD\_NM\_004828.2:102  
CgCtGcgagtctGGtatGACTACACCCACTGCTACTGCTGTTCAAGAGACAGCAGTAGCAGTGGGTGTAGTTTTTGct  
cgagctggcgaattcc  
>CD\_NM\_004828.2:221

CgCtGcgagtctGGtatGAGGGCAGTCTCTACGAGAAGAATTCAAGAGATTCTTCTCGTAGAGACTGCCCGTTTTTGct  
cgagctggcgaattcc  
>CD\_NM\_004828.2:559  
CgCtGcgagtctGGtatGACCACTGCAGGAGCCAGACAAGTTCAAGAGACTTGTCTGGCTCCTGCAGTGGTTTTTGct  
cgagctggcgaattcc  
>CD\_NM\_004828.2:869  
CgCtGcgagtctGGtatGATGTTGCAAGGACTAAGATAAGTTCAAGAGACTTATCTTAGTCCTTGCAACAGTTTTTGct  
cgagctggcgaattcc  
>CD\_NM\_147130:738  
CgCtGcgagtctGGtatGAACCGTCTATTACCAGGGCAAATTCAAGAGATTTGCCCTGGTAATAGACGGTGTTTTTTGct  
cgagctggcgaattcc  
>CD\_NM\_147130:265  
CgCtGcgagtctGGtatGCTGGCCTGGATGCTGTTGCTCATTCAAGAGATGAGCAACAGCATCCAGGCCATTTTTTGct  
cgagctggcgaattcc  
>CD\_NM\_147130:725  
CgCtGcgagtctGGtatGCGGCCGTGGGCAGCACCGTCTATTCAAGAGATAGACGGTGTGCCACGGCCATTTTTTGct  
cgagctggcgaattcc  
>CD\_NM\_147130.1:645  
CgCtGcgagtctGGtatGAAGAAAGAACATCCTCAGCTAGTTCAAGAGACTAGCTGAGGATGTTCTTTCTTTTTTGct  
cgagctggcgaattcc  
>CD\_NM\_147130.1:378  
CgCtGcgagtctGGtatGCGCTCCTTCAATGCCAGCCAAGTTCAAGAGACTTGGCTGGCATTGAAGGAGCATTTTTTGct  
cgagctggcgaattcc  
>CD\_NM\_147130.1:629  
CgCtGcgagtctGGtatGAACTCGGCTGGTGGTGGAGAAATTCAAGAGATTTCTCCACCACCAGCCGAGTCTTTTTTGct  
cgagctggcgaattcc  
>CD\_NM\_147130.1:446  
CgCtGcgagtctGGtatGCCAGGGAAGGAGGTGAGGAATTTCAAGAGAATTCCTCACCTCCTTCCCTGGATTTTTTGct  
cgagctggcgaattcc  
>CD\_NM\_147130.1:737  
CgCtGcgagtctGGtatGAACCGTCTATTACCAGGGCAAATTCAAGAGATTTGCCCTGGTAATAGACGGTGTTTTTTGct  
cgagctggcgaattcc  
>CD\_NM\_147130.1:274  
CgCtGcgagtctGGtatGCGCTGTTGCTCATCTTGATCATTTCAAGAGAATGATCAAGATGAGCAACAGCATTTTTTGct  
cgagctggcgaattcc  
>CD\_NM\_147130.1:367  
CgCtGcgagtctGGtatGACTTCCTGCCCTGCTCCTTCAATTCAAGAGATTGAAGGAGCAGGGCAGGAAGTTTTTGct  
cgagctggcgaattcc  
>CD\_NM\_147130.1:509  
CgCtGcgagtctGGtatGCTCCCGTTTCTCCATGACCACTTCAAGAGAGTGGTCATGGAGGAAACGGGAATTTTTTGct  
cgagctggcgaattcc  
>CD\_NM\_147130.1:506  
CgCtGcgagtctGGtatGCTCTTCCCGTTTCTCCATGACTTCAAGAGAGTCATGGAGGAAACGGGAAGAATTTTTTGct  
cgagctggcgaattcc  
>CD\_NM\_147130.1:265  
CgCtGcgagtctGGtatGCGGCCCTGGATGCTGTTGCTCATTTCAGAGAATGAGCAACAGCATCCAGGCCATTTTTTGct  
cgagctggcgaattcc  
>CD\_NM\_147130.1:587  
CgCtGcgagtctGGtatGAAGAGTGGAGGTGCTGGGCCTTTTCAAGAGAAAGGCCAGCACCTCCACTCTGTTTTTGct  
cgagctggcgaattcc  
>CD\_NM\_147130.1:272  
CgCtGcgagtctGGtatGAATGCTGTTGCTCATCTTGATCTTCAAGAGAGATCAAGATGAGCAACAGCATTTTTTGct  
cgagctggcgaattcc  
>CD\_NM\_147130.1:632

CgCctGcgagtctGGtatGCCGGCTGGTGGTGGAGAAAGAATTCAAGAGATTCTTTCTCCACCACCAGCCGATTTTTTGct  
cgagctggcgaattcc  
>CD\_NM\_147130.1:752  
CgCctGcgagtctGGtatGAGGCAAATGTCTGACCTGGAAATTCAGAGATTCCAGGTGACACATTTGCCCTTTTTTGct  
cgagctggcgaattcc  
>CD\_NM\_147130.1:403  
CgCctGcgagtctGGtatGAACTGGCCATTGGCTCCGTCACCTCAAGAGAGTGACGGAGCCAATGGCCAGTCTTTTTTGct  
cgagctggcgaattcc  
>CD\_NM\_147130.1:668  
CgCctGcgagtctGGtatGAGCTGGTACAGTCTCCTCCTTTTTCAAGAGAAAGGAGGAGGACTGTACCAGCCTTTTTTGct  
cgagctggcgaattcc  
>CD\_NM\_147130.1:560  
CgCctGcgagtctGGtatGCGGCCATGACGCCAGCATCTACTTCAAGAGAGTAGATGCTGGCGTCATGGCCTTTTTTGct  
cgagctggcgaattcc  
>CD\_NM\_147130.1:715  
CgCctGcgagtctGGtatGCTCTCTCTGTGGCCGTGGGCAGTTCAAGAGACTGCCACGGCCACAGAGAGAATTTTTGct  
cgagctggcgaattcc  
>CD\_NM\_147130.1:684  
CgCctGcgagtctGGtatGATCCTTCGGGCTGGATTCTATGTTCAAGAGACATAGAATCCAGCCGAAGAGTTTTTTGct  
cgagctggcgaattcc  
>CD\_NM\_147130.1:373  
CgCctGcgagtctGGtatGCGCCCTGCTCCTTCAATGCCAGTTCAAGAGACTGGCATTGAAGGAGCAGGGCATTTTTGct  
cgagctggcgaattcc  
>CD\_NM\_147130.1:816  
CgCctGcgagtctGGtatGACACCACCATGTGGGAGCTCAGTTCAAGAGACTGAGCTCCCACATGGTGGTGGTTTTTTGct  
cgagctggcgaattcc  
>CD\_NM\_147130.1:568  
CgCctGcgagtctGGtatGCCGCCAGCATCTACGTGTGCAGTTCAAGAGACTGCACACGTAGATGCTGGCGTTTTTTGct  
cgagctggcgaattcc  
>CD\_NM\_147130.1:704  
CgCctGcgagtctGGtatGCGCTGTCAGTTTTCTCTCTGTGTTCAAGAGACACAGAGAGAAAGCTGACAGCATTTTTGct  
cgagctggcgaattcc  
>CD\_NM\_147130.1:416  
CgCctGcgagtctGGtatGATCCGTCACGTGGTTCCGAGATTTCAAGAGAATCTCGGAACCACGTGACGGAGTTTTTTGct  
cgagctggcgaattcc  
>CD\_NM\_147130.1:406  
CgCctGcgagtctGGtatGCGGCCATTGGCTCCGTCACGTGTTCAAGAGACACGTGACGGAGCCAATGGCCATTTTTGct  
cgagctggcgaattcc  
>CD\_NM\_147130.1:266  
CgCctGcgagtctGGtatGAGCCTGGATGCTGTTGCTCATCTTCAAGAGAGATGAGCAACAGCATCCAGGCCTTTTTGct  
cgagctggcgaattcc  
>CD\_NM\_147130.1:811  
CgCctGcgagtctGGtatGACCTCCCACCACCATGTGGGAGTTCAAGAGACTCCCACATGGTGGTGGGAGGGTTTTTTGct  
cgagctggcgaattcc  
>CD\_NM\_147130.1:397  
CgCctGcgagtctGGtatGCAGGGAGACTGGCCATTGGCTCTTCAAGAGAGAGCCAATGGCCAGTCTCCCTTTTTTTGct  
cgagctggcgaattcc  
>CD\_NM\_147130.1:731  
CgCctGcgagtctGGtatGAGGCAGCACCGTCTATTACCAGTTCAAGAGACTGGTAATAGACGGTGCTGCCCTTTTTGct  
cgagctggcgaattcc  
>CD\_NM\_147130.1:533  
CgCctGcgagtctGGtatGAGCTGAGCTGCACATCCGGGACTTCAAGAGAGTCCCGGATGTGCAGCTCAGCCTTTTTGct  
cgagctggcgaattcc  
>CD\_NM\_004827:2227

CgCtGcgagtctGGtatGCACGGCTTGCAGCATAATGAATTCAAGAGATTCATTATGCTGCAAAGCCGTATTTTTGct  
cgagctggcgaattcc  
>CD\_NM\_004827:1670  
CgCtGcgagtctGGtatGAAGGCCTCTATAGCTCAGATCATTCAAGAGATGATCTGAGCTATAGAGGCCTGTTTTGct  
cgagctggcgaattcc  
>CD\_NM\_004827:2079  
CgCtGcgagtctGGtatGAAGGTCAGAGTGTGGTTTCTGTTTCAAGAGAACAGAAACCACACTCTGACCTGTTTTGct  
cgagctggcgaattcc  
>CD\_NM\_004827:886  
CgCtGcgagtctGGtatGAGGCACTCTGACGGTGAGAGAATTCAAGAGATTCCTCACCCTCAGAGTGCCCTTTTTGct  
cgagctggcgaattcc  
>CD\_NM\_004827:2381  
CgCtGcgagtctGGtatGAACGTGGCCTTGGCTTGTATGATTCAAGAGATCATAACAAGCCAAGGCCACGTGTTTTGct  
cgagctggcgaattcc  
>CD\_NM\_004827:2411  
CgCtGcgagtctGGtatGCTCCTCACAATTGCCTACCTGATTCAAGAGATCAGGTAGGCAATTGTGAGGAATTTTTGct  
cgagctggcgaattcc  
>CD\_NM\_004827:1997  
CgCtGcgagtctGGtatGCAGGCAGATGCCTTCTTCGTTATTCAAGAGATAACGAAGAAGGCATCTGCCTTTTTGct  
cgagctggcgaattcc  
>CD\_NM\_004827:2012  
CgCtGcgagtctGGtatGCTCGTTATGATGTTTACCCTTATTCAAGAGATAAGGGTAAACATCATAACGAATTTTTGct  
cgagctggcgaattcc  
>CD\_NM\_004827.2:831  
CgCtGcgagtctGGtatGCCCTGCCAATTTCAAATGTAATTTCAAGAGAAATTACATTTGAAATTGGCAGGTTTTGct  
cgagctggcgaattcc  
>CD\_NM\_004827.2:1880  
CgCtGcgagtctGGtatGCCTACAGAGTGTCTATTATTTTTCAAGAGAAAATAAGATGACACTCTGTAGTTTTGct  
cgagctggcgaattcc  
>CD\_NM\_004827.2:852  
CgCtGcgagtctGGtatGCTCAGGTTACGTGGTACAAGATTTCAAGAGAACTTGTACCACGTAACCTGAATTTTTGct  
cgagctggcgaattcc  
>CD\_NM\_004827.2:1337  
CgCtGcgagtctGGtatGCTCACTGTGAGGCCTATAATAATTTCAAGAGATTATTATAGGCCTCACAGTATTTTTGct  
cgagctggcgaattcc  
>CD\_NM\_004827.2:2411  
CgCtGcgagtctGGtatGCCCTCACAATTGCCTACCTGAATTTCAAGAGATTCAGGTAGGCAATTGTGAGGATTTTTGct  
cgagctggcgaattcc  
>CD\_NM\_004827.2:2079  
CgCtGcgagtctGGtatGCGGTCAGAGTGTGGTTTCTGTATTCAAGAGATACAGAAACCACACTCTGACCTTTTTGct  
cgagctggcgaattcc  
>CD\_NM\_004827.2:2025  
CgCtGcgagtctGGtatGCACCCTTATGATGGTGGCTTATTTCAAGAGAAATAAGCCACCATCATAAGGGTATTTTTGct  
cgagctggcgaattcc  
>CD\_NM\_004827.2:976  
CgCtGcgagtctGGtatGCACAGGGTCATTCAAGAGTTAGTTCAAGAGACTAACTCTTGAATGACCCTGTTTTGct  
cgagctggcgaattcc  
>CD\_NM\_004827.2:798  
CgCtGcgagtctGGtatGCTCTGGAGATGTTCTGATAAATTTCAAGAGAAATTATCAGAACATCTCCAGATTTTTGct  
cgagctggcgaattcc  
>CD\_NM\_004827.2:2388  
CgCtGcgagtctGGtatGATTGGCTTGTATGATTGTTATTTTTCAAGAGAAATAACAATCATAACAAGCAAGTTTTGct  
cgagctggcgaattcc  
>CD\_NM\_004827.2:1827

CgCctGcgagtctGGtatGAGAACTCTTTGTGGTAGAGAAGTTCAAGAGACTTCTCTACCACAAAGAGTTCCTTTTTTGct  
cgagctggcgaattcc  
>CD\_NM\_004827.2:1042  
CgCctGcgagtctGGtatGAGTGGTGTCTGGAGGAGAAATTCAGAGATTTCTCCTCCAGACACACCACGTTTTTTGct  
cgagctggcgaattcc  
>CD\_NM\_004827.2:2012  
CgCctGcgagtctGGtatGCCGTTATGATGTTTACCCTTATTTCAAGAGAATAAGGGTAAACATCATAACGATTTTTTGct  
cgagctggcgaattcc  
>CD\_NM\_004827.2:790  
CgCctGcgagtctGGtatGCGTGGATTATCTGGAGATGTTCTTCAAGAGAGAACATCTCCAGATAATCCACTTTTTTTGct  
cgagctggcgaattcc  
>CD\_NM\_004827.2:1299  
CgCctGcgagtctGGtatGCGCTCAGGAGGCCCTGGGATACTTCAAGAGAGTATCCCAAGGCCTCCTGAGCATTTTTTGct  
cgagctggcgaattcc  
>CD\_NM\_004827.2:2227  
CgCctGcgagtctGGtatGCCGGCTTTCAGCATAATGAATTTCAAGAGAATTCATTATGCTGCAAAGCCGTTTTTTGct  
cgagctggcgaattcc  
>CD\_NM\_004827.2:583  
CgCctGcgagtctGGtatGCTTACTGAAGGAGCTGTGTTAATTCAGAGATTAACACAGCTCCTTCAGTAAATTTTTGct  
cgagctggcgaattcc  
>CD\_NM\_004827.2:972  
CgCctGcgagtctGGtatGAATTAACAGGGTCATTCAGAGTTCAAGAGACTCTTGAATGACCCTGTTAATTTTTTGct  
cgagctggcgaattcc  
>CD\_NM\_004827.2:1970  
CgCctGcgagtctGGtatGCGTACTTCATGTTAGGATTGAATTCAGAGATTCATCCTAACATGAAGTACATTTTTTGct  
cgagctggcgaattcc  
>CD\_NM\_004827.2:1865  
CgCctGcgagtctGGtatGCATACATCAGCGATACTACAGTTCAAGAGACTGTAGTATCCGCTGATGTATTTTTTTGct  
cgagctggcgaattcc  
>CD\_NM\_004827.2:1697  
CgCctGcgagtctGGtatGAAGTCGTACTGGGACTGGTTATTTCAAGAGAATAACCAGTCCCAGTACGACTGTTTTTTGct  
cgagctggcgaattcc  
>CD\_NM\_004827.2:1147  
CgCctGcgagtctGGtatGCGCACAGCAAATGCTGTCTTTTTTCAAGAGAAAAGGACAGCATTTGCTGTGCTTTTTTTGct  
cgagctggcgaattcc  
>CD\_NM\_004827.2:763  
CgCctGcgagtctGGtatGAATGTCTTAGCTGCAAGGAAAGTTCAAGAGACTTTCCTTGCAGCTAAGACATTTTTTTGct  
cgagctggcgaattcc  
>CD\_NM\_004827.2:1414  
CgCctGcgagtctGGtatGCACAGAGAAGAAGACTTTAAAGTTCAAGAGACTTTAAAGTCTTCTTCTGTTTTTTTGct  
cgagctggcgaattcc  
>CD\_NM\_004827.2:1318  
CgCctGcgagtctGGtatGCACTTTGAATCAGCTGGTTATCTTCAAGAGAGATAACCAGCTGATTCAAAGTATTTTTTGct  
cgagctggcgaattcc  
>CD\_NM\_000214:845  
CgCctGcgagtctGGtatGAACCGTTCAACCTGACAGTATTTTCAAGAGAAATACTGTCAGGTTGAACGGTGTTTTTGct  
cgagctggcgaattcc  
>CD\_NM\_000214:1796  
CgCctGcgagtctGGtatGAGCCTCCTGTCGGGATTTGGTTTTTCAAGAGAAACCAAATCCCGACAGGAGCGTTTTTTGct  
cgagctggcgaattcc  
>CD\_NM\_000214:3454  
CgCctGcgagtctGGtatGCGGCCATTTCTGCTGAAGATATTTCAAGAGAATATCTTCAGCAGAAATGGCCATTTTTTGct  
cgagctggcgaattcc  
>CD\_NM\_000214:1276

CgCctGcgagtctGGtatGAGGGCGGCCAGCTCTGTGACAATTCAAGAGATTGTCACAGAGCTGGCCGCCCTTTTTGct  
cgagctggcgaattcc  
>CD\_NM\_000214:2738  
CgCctGcgagtctGGtatGAGGGCCCATCTGTGCTCAGAATTTCAAGAGAATTCTGAGCACAGATGGGCCCTTTTTGct  
cgagctggcgaattcc  
>CD\_NM\_000214:1637  
CgCctGcgagtctGGtatGATGCCAGTTAGATGCAAATGAATTCAAGAGATTCATTTGCATCTAACTGGCCTTTTTGct  
cgagctggcgaattcc  
>CD\_NM\_000214.1:522  
CgCctGcgagtctGGtatGCGGAGATCCTGTCCATGCAGAATTCAAGAGATTCTGCATGGACAGGATCTCCATTTTTGct  
cgagctggcgaattcc  
>CD\_NM\_000214.1:3109  
CgCctGcgagtctGGtatGCCGACCTTGCTGCTCCACAAATTCAAGAGATTTGTGGAGCAGGCAAGGTCGATTTTTGct  
cgagctggcgaattcc  
>CD\_NM\_000214.1:910  
CgCctGcgagtctGGtatGATGGCAGACGCTGAAGCAGAACTTCAAGAGAGTTCTGCTTCAGCGTCTGCCACTTTTTGct  
cgagctggcgaattcc  
>CD\_NM\_000214.1:3514  
CgCctGcgagtctGGtatGCATAATCGATCTTGTTAGTAAATTCAAGAGATTTACTAACAAGATCGATTATTTTTTTGct  
cgagctggcgaattcc  
>CD\_NM\_000214.1:3860  
CgCctGcgagtctGGtatGCGGACACACAATTCTGAAGTAGTTCAAGAGACTACTTCAGAATTGTGTGTCCTTTTTTTGct  
cgagctggcgaattcc  
>CD\_NM\_000214.1:1018  
CgCctGcgagtctGGtatGAAGAGATGACTTCTTTGGACACTTCAAGAGAGTGTCCAAAGAAGTCATCTCTGTTTTTTGct  
cgagctggcgaattcc  
>CD\_NM\_000214.1:1804  
CgCctGcgagtctGGtatGCCGGGATTTGGTTAATGGTTATTTCAAGAGAATAACCATTAACCAAATCCCGATTTTTGct  
cgagctggcgaattcc  
>CD\_NM\_000214.1:3987  
CgCctGcgagtctGGtatGCACACCCAACTGGACAAACAATTCAAGAGATTTGTTTGTCCAGTTTGGGTGTTTTTTTTGct  
cgagctggcgaattcc  
>CD\_NM\_000214.1:3455  
CgCctGcgagtctGGtatGACCATTTCTGCTGAAGATATACTTCAAGAGAGTATATCTTCAGCAGAAATGGCTTTTTGct  
cgagctggcgaattcc  
>CD\_NM\_000214.1:877  
CgCctGcgagtctGGtatGCTCTCACTCGGGCATGATCAACTTCAAGAGAGTTGATCATGCCCGAGTGAGAATTTTTGct  
cgagctggcgaattcc  
>CD\_NM\_000214.1:3232  
CgCctGcgagtctGGtatGCCTCCAGCCGGTGAAGACAAAGTTCAAGAGACTTTGTCTTACCGGCTGGAGATTTTTGct  
cgagctggcgaattcc  
>CD\_NM\_000214.1:1352  
CgCctGcgagtctGGtatGCACACAGGCCCTGACAAATATCTTCAAGAGAGATATTTGTCAGGGCCTGTGTTTTTTTTGct  
cgagctggcgaattcc  
>CD\_NM\_000214.1:2344  
CgCctGcgagtctGGtatGAATCGATGGTGTCAACTCCTACTTCAAGAGAGTAGGAGTTGACACCATCGATGTTTTTTGct  
cgagctggcgaattcc  
>CD\_NM\_000214.1:2228  
CgCctGcgagtctGGtatGCAGAGTCAGTCGGGAGGCAAATTTCAAGAGAATTTGCCTCCCGACTGACTCTTTTTTTGct  
cgagctggcgaattcc  
>CD\_NM\_000214.1:1637  
CgCctGcgagtctGGtatGCGCCAGTTAGATGCAAATGAATTTCAAGAGAATTCATTTGCATCTAACTGGCCTTTTTGct  
cgagctggcgaattcc  
>CD\_NM\_000214.1:1288

CgCtGcgagtctGGtatGATGTGACAAAGATCTCAATTACTTCAAGAGAGTAATTGAGATCTTTGTCACAGTTTTTGct  
cgagctggcgaattcc  
>CD\_NM\_000214.1:1427  
CgCtGcgagtctGGtatGACCTGCCTCTCTGATCCCTGTCTTCAAGAGAGACAGGGATCAGAGAGGCAGGCTTTTTTGct  
cgagctggcgaattcc  
>CD\_NM\_000214.1:1222  
CgCtGcgagtctGGtatGCTGCGTCCACGGCATCTGTAATTTCAAGAGAATTACAGATGCCGTGGACGCATTTTTTGct  
cgagctggcgaattcc  
>CD\_NM\_000214.1:2850  
CgCtGcgagtctGGtatGATGGGCCCGACTGCAGAATAAATTTCAAGAGATTTATTCTGCAGTCGGGCCAGTTTTTGct  
cgagctggcgaattcc  
>CD\_NM\_000214.1:618  
CgCtGcgagtctGGtatGCCGAGTGTGACACATACTTCAATTCAAGAGATTGAAGTATGTGTCACACTCGTTTTTGct  
cgagctggcgaattcc  
>CD\_NM\_000214.1:2455  
CgCtGcgagtctGGtatGATGTGCGGACCTGGTCAATGACTTCAAGAGAGTCATTGACCAGGTCGCGACACTTTTTTGct  
cgagctggcgaattcc  
>CD\_NM\_000214.1:1909  
CgCtGcgagtctGGtatGAGGTCACTGTCAGAATGAAATCTTCAAGAGAGATTTTATTCTGACAGTGACCCTTTTTTGct  
cgagctggcgaattcc  
>CD\_NM\_000214.1:2310  
CgCtGcgagtctGGtatGATGAGAGCAACCCTTGTAGAAATTTCAAGAGATTTCTACAAGGGTTGCTCTCACTTTTTTGct  
cgagctggcgaattcc  
>CD\_NM\_000214.1:3720  
CgCtGcgagtctGGtatGAACACTCAGCCTCTGAGGACAATTTCAAGAGATTGTCCTCAGAGGCTGAGTGTGTTTTTGct  
cgagctggcgaattcc  
>CD\_NM\_000214.1:1741  
CgCtGcgagtctGGtatGAGGTCAGAATTGTGACATAAATTTCAAGAGAATTTATGTCACAATTCTGACCCTTTTTTGct  
cgagctggcgaattcc  
>CD\_NM\_000214.1:1517  
CgCtGcgagtctGGtatGACCACATGCTCTACAAACATTGTTCAAGAGACAATGTTTGTAGAGCATGTGGGTTTTTGct  
cgagctggcgaattcc  
>CD\_NM\_000214.1:1739  
CgCtGcgagtctGGtatGCTGGGTCAGAATTGTGACATAATTTCAAGAGATTATGTCACAATTCTGACCATTTTTTGct  
cgagctggcgaattcc
